# Supplementary material for: Identification of Human Cell Cycle Phase Markers Based on Single‐Cell RNA‐Seq Data by Using Machine Learning Methods
Source: Hindawi journal article supplement (doi:10.1155/2022/2516653), 2022-01-01
Supplement: f1 [file 2516653.f1.pdf]

**Table S1.** The feature list filtered by Boruta and ordered by three feature ranking algorithms

(1) Feature list yielded by mRMR method

| <b>Rank</b> | <b>Ensembl ID</b> | <b>Gene symbol</b> |
|-------------|-------------------|--------------------|
| 1           | ENSG00000170312   | CDK1               |
| 2           | ENSG00000189057   | FAM111B            |
| 3           | ENSG00000112029   | FBXO5              |
| 4           | ENSG00000131747   | TOP2A              |
| 5           | ENSG00000166801   | FAM111A            |
| 6           | ENSG00000115641   | FHL2               |
| 7           | ENSG00000123485   | HJURP              |
| 8           | ENSG00000171320   | ESCO2              |
| 9           | ENSG00000131475   | VPS25              |
| 10          | ENSG00000175063   | UBE2C              |
| 11          | ENSG00000051341   | POLQ               |
| 12          | ENSG00000112118   | MCM3               |
| 13          | ENSG00000178999   | AURKB              |
| 14          | ENSG00000198331   | HYLS1              |
| 15          | ENSG00000171848   | RRM2               |
| 16          | ENSG00000085999   | RAD54L             |
| 17          | ENSG00000184661   | CDCA2              |
| 18          | ENSG00000177943   | MAMDC4             |
| 19          | ENSG00000156802   | ATAD2              |
| 20          | ENSG00000093009   | CDC45              |
| 21          | ENSG00000140451   | PIF1               |
| 22          | ENSG00000165304   | MELK               |
| 23          | ENSG00000197061   | H4C3               |
| 24          | ENSG00000186185   | KIF18B             |
| 25          | ENSG00000076003   | MCM6               |
| 26          | ENSG00000076248   | UNG                |
| 27          | ENSG00000146670   | CDCA5              |
| 28          | ENSG00000173207   | CKS1B              |
| 29          | ENSG00000102384   | CENPI              |
| 30          | ENSG00000274997   | H2AC12             |
| 31          | ENSG00000137807   | KIF23              |
| 32          | ENSG00000105011   | ASF1B              |
| 33          | ENSG00000101447   | FAM83D             |
| 34          | ENSG00000121152   | NCAPH              |
| 35          | ENSG00000259848   | LOC442028          |
| 36          | ENSG00000182481   | KPNA2              |
| 37          | ENSG00000012048   | BRCA1              |
| 38          | ENSG00000229089   | ANKRD20A8P         |

|    |                 |          |
|----|-----------------|----------|
| 39 | ENSG00000198056 | PRIM1    |
| 40 | ENSG00000162063 | CCNF     |
| 41 | ENSG00000101104 | PABPC1L  |
| 42 | ENSG00000178719 | GRINA    |
| 43 | ENSG00000166803 | PCLAF    |
| 44 | ENSG00000135451 | TROAP    |
| 45 | ENSG00000094804 | CDC6     |
| 46 | ENSG00000077152 | UBE2T    |
| 47 | ENSG00000276368 | H2AC14   |
| 48 | ENSG00000121716 | PILRB    |
| 49 | ENSG00000169607 | CKAP2L   |
| 50 | ENSG00000175305 | CCNE2    |
| 51 | ENSG00000164104 | HMGB2    |
| 52 | ENSG00000123473 | STIL     |
| 53 | ENSG00000176890 | TYMS     |
| 54 | ENSG00000145386 | CCNA2    |
| 55 | ENSG00000100297 | MCM5     |
| 56 | ENSG00000149636 | DSN1     |
| 57 | ENSG00000168298 | H1-4     |
| 58 | ENSG00000122952 | ZWINT    |
| 59 | ENSG00000171793 | CTPS1    |
| 60 | ENSG00000111247 | RAD51AP1 |
| 61 | ENSG00000106367 | AP1S1    |
| 62 | ENSG00000196230 | TUBB     |
| 63 | ENSG00000178966 | RMI1     |
| 64 | ENSG00000075218 | GTSE1    |
| 65 | ENSG00000146278 | PNRC1    |
| 66 | ENSG00000132646 | PCNA     |
| 67 | ENSG00000134057 | CCNB1    |
| 68 | ENSG00000105173 | CCNE1    |
| 69 | ENSG00000100097 | LGALS1   |
| 70 | ENSG00000104738 | MCM4     |
| 71 | ENSG00000134690 | CDCA8    |
| 72 | ENSG00000137310 | TCF19    |
| 73 | ENSG00000127483 | HP1BP3   |
| 74 | ENSG00000148773 | MKI67    |
| 75 | ENSG00000077514 | POLD3    |
| 76 | ENSG00000183856 | IQGAP3   |
| 77 | ENSG00000031691 | CENPQ    |
| 78 | ENSG00000101412 | E2F1     |
| 79 | ENSG00000111665 | CDCA3    |
| 80 | ENSG00000213853 | EMP2     |

|     |                 |           |
|-----|-----------------|-----------|
| 81  | ENSG00000007968 | E2F2      |
| 82  | ENSG00000065328 | MCM10     |
| 83  | ENSG00000118193 | KIF14     |
| 84  | ENSG00000088986 | DYNLL1    |
| 85  | ENSG00000119801 | YPEL5     |
| 86  | ENSG00000101773 | RBBP8     |
| 87  | ENSG00000142945 | KIF2C     |
| 88  | ENSG00000106211 | HSPB1     |
| 89  | ENSG00000130299 | GTPBP3    |
| 90  | ENSG00000163808 | KIF15     |
| 91  | ENSG00000123975 | CKS2      |
| 92  | ENSG00000128510 | CPA4      |
| 93  | ENSG00000013573 | DDX11     |
| 94  | ENSG00000121211 | MND1      |
| 95  | ENSG00000127922 | SEM1      |
| 96  | ENSG00000006327 | TNFRSF12A |
| 97  | ENSG00000178074 | C2orf69   |
| 98  | ENSG00000139211 | AMIGO2    |
| 99  | ENSG00000135476 | ESPL1     |
| 100 | ENSG00000165480 | SKA3      |
| 101 | ENSG00000205352 | PRR13     |
| 102 | ENSG00000126368 | NR1D1     |
| 103 | ENSG00000163535 | SGO2      |
| 104 | ENSG00000178607 | ERN1      |
| 105 | ENSG00000119669 | IRF2BPL   |
| 106 | ENSG00000129810 | SGO1      |
| 107 | ENSG00000170889 | RPS9      |
| 108 | ENSG00000137804 | NUSAP1    |
| 109 | ENSG00000070950 | RAD18     |
| 110 | ENSG00000124610 | H1-1      |
| 111 | ENSG00000138182 | KIF20B    |
| 112 | ENSG00000117724 | CENPF     |
| 113 | ENSG00000136982 | DSCC1     |
| 114 | ENSG00000091164 | TXNL1     |
| 115 | ENSG00000112742 | TTK       |
| 116 | ENSG00000278259 | MYO19     |
| 117 | ENSG00000105355 | PLIN3     |
| 118 | ENSG00000115163 | CENPA     |
| 119 | ENSG00000118655 | DCLRE1B   |
| 120 | ENSG00000235571 | SNX18P14  |
| 121 | ENSG00000163918 | RFC4      |
| 122 | ENSG00000164611 | PTTG1     |

|     |                 |          |
|-----|-----------------|----------|
| 123 | ENSG00000151725 | CENPU    |
| 124 | ENSG00000128951 | DUT      |
| 125 | ENSG00000120802 | TMPO     |
| 126 | ENSG00000134291 | TMEM106C |
| 127 | ENSG00000100714 | MTHFD1   |
| 128 | ENSG00000198763 | ND2      |
| 129 | ENSG00000133119 | RFC3     |
| 130 | ENSG00000213024 | NUP62    |
| 131 | ENSG00000142731 | PLK4     |
| 132 | ENSG00000025770 | NCAPH2   |
| 133 | ENSG00000103995 | CEP152   |
| 134 | ENSG00000141232 | TOB1     |
| 135 | ENSG00000166508 | MCM7     |
| 136 | ENSG00000167553 | TUBA1C   |
| 137 | ENSG00000102362 | SYTL4    |
| 138 | ENSG00000091651 | ORC6     |
| 139 | ENSG00000118263 | KLF7     |
| 140 | ENSG00000178974 | FBXO34   |
| 141 | ENSG00000152253 | SPC25    |
| 142 | ENSG00000221829 | FANCG    |
| 143 | ENSG00000170734 | POLH     |
| 144 | ENSG00000088325 | TPX2     |
| 145 | ENSG00000132823 | OSER1    |
| 146 | ENSG00000175573 | C11orf68 |
| 147 | ENSG00000178913 | TAF7     |
| 148 | ENSG00000161800 | RACGAP1  |
| 149 | ENSG00000129484 | PARP2    |
| 150 | ENSG00000198033 | TUBA3C   |
| 151 | ENSG00000263513 | FAM72C   |
| 152 | ENSG00000130816 | DNMT1    |
| 153 | ENSG00000175130 | MARCKSL1 |
| 154 | ENSG00000162607 | USP1     |
| 155 | ENSG00000168078 | PBK      |
| 156 | ENSG00000169242 | EFNA1    |
| 157 | ENSG00000154473 | BUB3     |
| 158 | ENSG00000100100 | PIK3IP1  |
| 159 | ENSG00000111206 | FOXM1    |
| 160 | ENSG00000183864 | TOB2     |
| 161 | ENSG00000101608 | MYL12A   |
| 162 | ENSG00000074266 | EED      |
| 163 | ENSG00000149257 | SERPINH1 |
| 164 | ENSG00000175606 | TMEM70   |

|     |                 |            |
|-----|-----------------|------------|
| 165 | ENSG00000123737 | EXOSC9     |
| 166 | ENSG00000165490 | DDIAS      |
| 167 | ENSG00000143933 | CALM2      |
| 168 | ENSG00000054654 | SYNE2      |
| 169 | ENSG00000122483 | CCDC18     |
| 170 | ENSG00000033030 | ZCCHC8     |
| 171 | ENSG00000101945 | SUV39H1    |
| 172 | ENSG00000121388 | Pseudogene |
| 173 | ENSG00000170779 | CDCA4      |
| 174 | ENSG00000146425 | DYNLT1     |
| 175 | ENSG00000087586 | AURKA      |
| 176 | ENSG00000112576 | CCND3      |
| 177 | ENSG00000049541 | RFC2       |
| 178 | ENSG00000080986 | NDC80      |
| 179 | ENSG00000091436 | MAP3K20    |
| 180 | ENSG00000131470 | PSMC3IP    |
| 181 | ENSG00000117399 | CDC20      |
| 182 | ENSG00000180304 | OAZ2       |
| 183 | ENSG00000165501 | LRR1       |
| 184 | ENSG00000169679 | BUB1       |
| 185 | ENSG00000116717 | GADD45A    |
| 186 | ENSG00000154640 | BTG3       |
| 187 | ENSG00000079482 | OPHN1      |
| 188 | ENSG00000100479 | POLE2      |
| 189 | ENSG00000188985 | DHFRP1     |
| 190 | ENSG00000171241 | SHCBP1     |
| 191 | ENSG00000156970 | BUB1B      |
| 192 | ENSG00000184678 | H2BC21     |
| 193 | ENSG00000051180 | RAD51      |
| 194 | ENSG00000198826 | ARHGAP11A  |
| 195 | ENSG00000188529 | SRSF10     |
| 196 | ENSG00000185787 | MORF4L1    |
| 197 | ENSG00000108106 | UBE2S      |
| 198 | ENSG00000078900 | TP73       |
| 199 | ENSG00000101003 | GINS1      |
| 200 | ENSG00000126226 | PCID2      |
| 201 | ENSG00000117069 | ST6GALNAC5 |
| 202 | ENSG00000137812 | KNL1       |
| 203 | ENSG00000166483 | WEE1       |
| 204 | ENSG00000171223 | JUNB       |
| 205 | ENSG00000204382 | XAGE1B     |
| 206 | ENSG00000090889 | KIF4A      |

|     |                 |           |
|-----|-----------------|-----------|
| 207 | ENSG00000070761 | CFAP20    |
| 208 | ENSG00000114315 | HES1      |
| 209 | ENSG00000077684 | JADE1     |
| 210 | ENSG00000162073 | PAQR4     |
| 211 | ENSG00000165891 | E2F7      |
| 212 | ENSG00000144554 | FANCD2    |
| 213 | ENSG00000049192 | ADAMTS6   |
| 214 | ENSG00000166851 | PLK1      |
| 215 | ENSG00000165502 | RPL36AL   |
| 216 | ENSG00000131153 | GINS2     |
| 217 | ENSG00000284906 | ARHGAP11B |
| 218 | ENSG00000109971 | HSPA8     |
| 219 | ENSG00000120334 | CENPL     |
| 220 | ENSG00000166965 | RCCD1     |
| 221 | ENSG00000235109 | ZSCAN31   |
| 222 | ENSG00000072571 | HMMR      |
| 223 | ENSG00000170425 | ADORA2B   |
| 224 | ENSG00000116830 | TTF2      |
| 225 | ENSG00000104064 | GABPB1    |
| 226 | ENSG00000130202 | NECTIN2   |
| 227 | ENSG00000183963 | SMTN      |
| 228 | ENSG00000105516 | DBP       |
| 229 | ENSG00000118971 | CCND2     |
| 230 | ENSG00000213551 | DNAJC9    |
| 231 | ENSG00000126787 | DLGAP5    |
| 232 | ENSG00000075618 | FSCN1     |
| 233 | ENSG00000206625 | RNU6-1    |
| 234 | ENSG00000152359 | POC5      |
| 235 | ENSG00000176222 | ZNF404    |
| 236 | ENSG00000131462 | TUBG1     |
| 237 | ENSG00000150991 | UBC       |
| 238 | ENSG00000113456 | RAD1      |
| 239 | ENSG00000158373 | H2BC5     |
| 240 | ENSG00000148019 | CEP78     |
| 241 | ENSG00000167601 | AXL       |
| 242 | ENSG00000013810 | TACC3     |
| 243 | ENSG00000144227 | NXPH2     |
| 244 | ENSG00000075702 | WDR62     |
| 245 | ENSG00000177426 | TGIF1     |
| 246 | ENSG00000011426 | ANLN      |
| 247 | ENSG00000196866 | H2AC7     |
| 248 | ENSG00000136492 | BRIP1     |

|     |                 |            |
|-----|-----------------|------------|
| 249 | ENSG00000282988 | Pseudogene |
| 250 | ENSG00000163507 | CIP2A      |
| 251 | ENSG00000129534 | MIS18BP1   |
| 252 | ENSG00000102804 | TSC22D1    |
| 253 | ENSG00000104147 | OIP5       |
| 254 | ENSG00000184047 | DIABLO     |
| 255 | ENSG00000162614 | NEXN       |
| 256 | ENSG00000112759 | SLC29A1    |
| 257 | ENSG00000198901 | PRC1       |
| 258 | ENSG00000168140 | VASN       |
| 259 | ENSG00000223564 | CYP4F32P   |
| 260 | ENSG00000176974 | SHMT1      |
| 261 | ENSG00000117616 | RSRP1      |
| 262 | ENSG00000136108 | CKAP2      |
| 263 | ENSG00000105270 | CLIP3      |
| 264 | ENSG00000147813 | NAPRT      |
| 265 | ENSG00000119969 | HELLS      |
| 266 | ENSG00000006625 | GGCT       |
| 267 | ENSG00000182197 | EXT1       |
| 268 | ENSG00000100162 | CENPM      |
| 269 | ENSG00000213347 | MXD3       |
| 270 | ENSG00000142871 | CCN1       |
| 271 | ENSG00000179958 | DCTPP1     |
| 272 | ENSG00000065548 | ZC3H15     |
| 273 | ENSG00000109805 | NCAPG      |
| 274 | ENSG00000166002 | SMCO4      |
| 275 | ENSG00000164087 | POC1A      |
| 276 | ENSG00000123933 | MXD4       |
| 277 | ENSG00000143367 | TUFT1      |
| 278 | ENSG00000101639 | CEP192     |
| 279 | ENSG00000159335 | PTMS       |
| 280 | ENSG00000101138 | CSTF1      |
| 281 | ENSG00000169490 | TM2D2      |
| 282 | ENSG00000164251 | F2RL1      |
| 283 | ENSG00000128965 | CHAC1      |
| 284 | ENSG00000177917 | ARL6IP6    |
| 285 | ENSG00000040275 | SPDL1      |
| 286 | ENSG00000146410 | MTFR2      |
| 287 | ENSG00000126945 | HNRNPH2    |
| 288 | ENSG00000149483 | TMEM138    |
| 289 | ENSG00000121621 | KIF18A     |
| 290 | ENSG00000122644 | ARL4A      |

|     |                 |            |
|-----|-----------------|------------|
| 291 | ENSG00000182378 | PLCXD1     |
| 292 | ENSG00000130695 | CEP85      |
| 293 | ENSG00000188229 | TUBB4B     |
| 294 | ENSG00000232502 | Pseudogene |
| 295 | ENSG00000147155 | EBP        |
| 296 | ENSG00000140332 | TLE3       |
| 297 | ENSG00000142541 | RPL13A     |
| 298 | ENSG00000101057 | MYBL2      |
| 299 | ENSG00000130921 | MTRFR      |
| 300 | ENSG00000088305 | DNMT3B     |
| 301 | ENSG00000164754 | RAD21      |
| 302 | ENSG00000101574 | METTL4     |
| 303 | ENSG00000117318 | ID3        |
| 304 | ENSG00000065911 | MTHFD2     |
| 305 | ENSG00000128016 | ZFP36      |
| 306 | ENSG00000163655 | GMPS       |
| 307 | ENSG00000042088 | TDP1       |
| 308 | ENSG00000143761 | ARF1       |
| 309 | ENSG00000085840 | ORC1       |
| 310 | ENSG00000249859 | PVT1       |
| 311 | ENSG00000125898 | FAM110A    |
| 312 | ENSG00000135211 | TMEM60     |
| 313 | ENSG00000205212 | CCDC144NL  |
| 314 | ENSG00000123416 | TUBA1B     |
| 315 | ENSG00000198680 | TUSC1      |
| 316 | ENSG00000123146 | ADGRE5     |
| 317 | ENSG00000136699 | SMPD4      |
| 318 | ENSG00000186472 | PCLO       |
| 319 | ENSG00000225630 | MTND2P28   |
| 320 | ENSG00000113810 | SMC4       |
| 321 | ENSG00000111321 | LTBR       |
| 322 | ENSG00000113369 | ARRDC3     |
| 323 | ENSG00000149548 | CCDC15     |
| 324 | ENSG00000109255 | NMU        |
| 325 | ENSG00000129195 | PIMREG     |
| 326 | ENSG00000124216 | SNAI1      |
| 327 | ENSG00000175592 | FOSL1      |
| 328 | ENSG00000214756 | CSKMT      |
| 329 | ENSG00000132485 | ZRANB2     |
| 330 | ENSG00000009954 | BAZ1B      |
| 331 | ENSG00000134802 | SLC43A3    |
| 332 | ENSG00000176105 | YES1       |



|     |                 |          |
|-----|-----------------|----------|
| 333 | ENSG00000113569 | NUP155   |
| 334 | ENSG00000188610 | FAM72B   |
| 335 | ENSG00000131446 | MGAT1    |
| 336 | ENSG00000138385 | SSB      |
| 337 | ENSG00000188486 | H2AX     |
| 338 | ENSG00000162231 | NXF1     |
| 339 | ENSG00000117450 | PRDX1    |
| 340 | ENSG00000117650 | NEK2     |
| 341 | ENSG00000164649 | CDCA7L   |
| 342 | ENSG00000183255 | PTTG1IP  |
| 343 | ENSG00000120694 | HSPH1    |
| 344 | ENSG00000174371 | EXO1     |
| 345 | ENSG00000109674 | NEIL3    |
| 346 | ENSG00000204580 | DDR1     |
| 347 | ENSG00000105856 | HBP1     |
| 348 | ENSG00000138346 | DNA2     |
| 349 | ENSG00000145779 | TNFAIP8  |
| 350 | ENSG00000006634 | DBF4     |
| 351 | ENSG00000132341 | RAN      |
| 352 | ENSG00000118680 | MYL12B   |
| 353 | ENSG00000140319 | SRP14    |
| 354 | ENSG00000024526 | DEPDC1   |
| 355 | ENSG00000105821 | DNAJC2   |
| 356 | ENSG00000100526 | CDKN3    |
| 357 | ENSG00000103121 | CMC2     |
| 358 | ENSG00000186283 | TOR3A    |
| 359 | ENSG00000092140 | G2E3     |
| 360 | ENSG00000179094 | PER1     |
| 361 | ENSG00000196787 | H2AC11   |
| 362 | ENSG00000256618 | MTRNR2L1 |
| 363 | ENSG00000116133 | DHCR24   |
| 364 | ENSG00000163950 | SLBP     |
| 365 | ENSG00000152518 | ZFP36L2  |
| 366 | ENSG00000118181 | RPS25    |
| 367 | ENSG00000165886 | UBTD1    |
| 368 | ENSG00000145526 | CDH18    |
| 369 | ENSG00000115946 | PNO1     |
| 370 | ENSG00000170540 | ARL6IP1  |
| 371 | ENSG00000104267 | CA2      |
| 372 | ENSG00000130429 | ARPC1B   |
| 373 | ENSG00000158402 | CDC25C   |
| 374 | ENSG00000168916 | ZNF608   |

|     |                  |           |
|-----|------------------|-----------|
| 375 | ENSG00000010292  | NCAPD2    |
| 376 | ENSG000000162433 | AK4       |
| 377 | ENSG000000127337 | YEATS4    |
| 378 | ENSG000000101868 | POLA1     |
| 379 | ENSG000000143621 | ILF2      |
| 380 | ENSG000000187231 | SESTD1    |
| 381 | ENSG000000178105 | DDX10     |
| 382 | ENSG000000164211 | STARD4    |
| 383 | ENSG000000204899 | MZT1      |
| 384 | ENSG000000127948 | POR       |
| 385 | ENSG000000087077 | TRIP6     |
| 386 | ENSG000000164924 | YWHAZ     |
| 387 | ENSG000000167978 | SRRM2     |
| 388 | ENSG000000173848 | NET1      |
| 389 | ENSG000000108055 | SMC3      |
| 390 | ENSG000000095777 | MYO3A     |
| 391 | ENSG000000096093 | EFHC1     |
| 392 | ENSG000000161980 | POLR3K    |
| 393 | ENSG000000075426 | FOSL2     |
| 394 | ENSG000000139697 | SBNO1     |
| 395 | ENSG000000140350 | ANP32A    |
| 396 | ENSG000000089685 | BIRC5     |
| 397 | ENSG000000265790 | RNASEH1P1 |
| 398 | ENSG000000143476 | DTL       |
| 399 | ENSG000000184260 | H2AC20    |
| 400 | ENSG000000135046 | ANXA1     |
| 401 | ENSG000000115306 | SPTBN1    |
| 402 | ENSG000000100242 | SUN2      |
| 403 | ENSG000000172893 | DHCR7     |
| 404 | ENSG000000122565 | CBX3      |
| 405 | ENSG000000146834 | MEPCE     |
| 406 | ENSG000000232388 | SMIM26    |
| 407 | ENSG000000138160 | KIF11     |
| 408 | ENSG000000112984 | KIF20A    |
| 409 | ENSG000000163002 | NUP35     |
| 410 | ENSG000000146263 | MMS22L    |
| 411 | ENSG000000158246 | TENT5B    |
| 412 | ENSG000000173456 | RNF26     |
| 413 | ENSG000000109321 | AREG      |
| 414 | ENSG000000207507 | RNU6-9    |
| 415 | ENSG000000109861 | CTSC      |
| 416 | ENSG000000198890 | PRMT6     |

|     |                 |           |
|-----|-----------------|-----------|
| 417 | ENSG00000057019 | DCBLD2    |
| 418 | ENSG00000136122 | BORA      |
| 419 | ENSG00000129474 | AJUBA     |
| 420 | ENSG00000106462 | EZH2      |
| 421 | ENSG00000134375 | TIMM17A   |
| 422 | ENSG00000105372 | RPS19     |
| 423 | ENSG00000276180 | H4C9      |
| 424 | ENSG00000104671 | DCTN6     |
| 425 | ENSG00000109099 | PMP22     |
| 426 | ENSG00000198554 | WDHD1     |
| 427 | ENSG00000100401 | RANGAP1   |
| 428 | ENSG00000100941 | PNN       |
| 429 | ENSG00000096433 | ITPR3     |
| 430 | ENSG00000121957 | GPSM2     |
| 431 | ENSG00000138175 | ARL3      |
| 432 | ENSG00000176014 | TUBB6     |
| 433 | ENSG00000092969 | TGFB2     |
| 434 | ENSG00000137135 | ARHGGEF39 |
| 435 | ENSG00000165181 | SHOC1     |
| 436 | ENSG00000160789 | LMNA      |
| 437 | ENSG00000100632 | ERH       |
| 438 | ENSG00000013588 | GPRC5A    |
| 439 | ENSG00000173068 | BNC2      |
| 440 | ENSG00000129173 | E2F8      |
| 441 | ENSG00000128245 | YWHAH     |
| 442 | ENSG00000136997 | MYC       |
| 443 | ENSG00000124172 | ATP5F1E   |
| 444 | ENSG00000117139 | KDM5B     |
| 445 | ENSG00000102977 | ACD       |
| 446 | ENSG00000197956 | S100A6    |
| 447 | ENSG00000138180 | CEP55     |
| 448 | ENSG00000061337 | LZTS1     |
| 449 | ENSG00000166949 | SMAD3     |
| 450 | ENSG00000197256 | KANK2     |
| 451 | ENSG00000115875 | SRSF7     |
| 452 | ENSG00000148677 | ANKRD1    |
| 453 | ENSG00000078401 | EDN1      |
| 454 | ENSG00000172432 | GTPBP2    |
| 455 | ENSG00000128708 | HAT1      |
| 456 | ENSG00000171490 | RSL1D1    |
| 457 | ENSG00000121741 | ZMYM2     |
| 458 | ENSG00000198088 | NUP62CL   |

|     |                 |          |
|-----|-----------------|----------|
| 459 | ENSG00000143815 | LBR      |
| 460 | ENSG00000104635 | SLC39A14 |
| 461 | ENSG00000161888 | SPC24    |
| 462 | ENSG00000197299 | BLM      |
| 463 | ENSG00000171552 | BCL2L1   |
| 464 | ENSG00000144136 | SLC20A1  |
| 465 | ENSG00000100519 | PSMC6    |
| 466 | ENSG00000164985 | PSIP1    |
| 467 | ENSG00000173559 | NABP1    |
| 468 | ENSG00000204370 | SDHD     |
| 469 | ENSG00000167552 | TUBA1A   |
| 470 | ENSG00000196550 | FAM72A   |
| 471 | ENSG00000114346 | ECT2     |
| 472 | ENSG00000171867 | PRNP     |
| 473 | ENSG00000068489 | PRR11    |
| 474 | ENSG00000183337 | BCOR     |
| 475 | ENSG00000157191 | NECAP2   |
| 476 | ENSG00000185650 | ZFP36L1  |
| 477 | ENSG00000133121 | STARD13  |
| 478 | ENSG00000189241 | TSPYL1   |
| 479 | ENSG00000170264 | FAM161A  |
| 480 | ENSG00000136436 | CALCOCO2 |
| 481 | ENSG00000072864 | NDE1     |
| 482 | ENSG00000087086 | FTL      |
| 483 | ENSG00000167325 | RRM1     |
| 484 | ENSG00000207041 | RNU6-3P  |
| 485 | ENSG00000131737 | KRT34    |
| 486 | ENSG00000197172 | MAGEA6   |
| 487 | ENSG00000166140 | ZFYVE19  |
| 488 | ENSG00000196531 | NACA     |
| 489 | ENSG00000180573 | H2AC6    |
| 490 | ENSG00000170545 | SMAGP    |
| 491 | ENSG00000115738 | ID2      |
| 492 | ENSG00000182541 | LIMK2    |
| 493 | ENSG00000166441 | RPL27A   |
| 494 | ENSG00000187051 | RPS19BP1 |
| 495 | ENSG00000132475 | H3-3B    |
| 496 | ENSG00000231007 | CDC20P1  |
| 497 | ENSG00000270882 | H4C14    |
| 498 | ENSG00000124766 | SOX4     |
| 499 | ENSG00000153233 | PTPRR    |
| 500 | ENSG00000034510 | TMSB10   |

|     |                 |           |
|-----|-----------------|-----------|
| 501 | ENSG00000120129 | DUSP1     |
| 502 | ENSG00000101224 | CDC25B    |
| 503 | ENSG00000186193 | SAPCD2    |
| 504 | ENSG00000276043 | UHRF1     |
| 505 | ENSG00000149798 | CDC42EP2  |
| 506 | ENSG00000168061 | SAC3D1    |
| 507 | ENSG00000106305 | AIMP2     |
| 508 | ENSG00000188312 | CENPP     |
| 509 | ENSG00000120539 | MASTL     |
| 510 | ENSG00000056097 | ZFR       |
| 511 | ENSG00000151466 | SCLT1     |
| 512 | ENSG00000140443 | IGF1R     |
| 513 | ENSG00000103540 | CCP110    |
| 514 | ENSG00000112972 | HMGCS1    |
| 515 | ENSG00000204389 | HSPA1A    |
| 516 | ENSG00000162062 | TEDC2     |
| 517 | ENSG00000117143 | UAP1      |
| 518 | ENSG00000116667 | C1orf21   |
| 519 | ENSG00000105991 | HOXA1     |
| 520 | ENSG00000073111 | MCM2      |
| 521 | ENSG00000068028 | RASSF1    |
| 522 | ENSG00000124635 | H2BC11    |
| 523 | ENSG00000125319 | HROB      |
| 524 | ENSG00000186638 | KIF24     |
| 525 | ENSG00000160753 | RUSC1     |
| 526 | ENSG00000176225 | RTTN      |
| 527 | ENSG00000115687 | PASK      |
| 528 | ENSG00000185567 | AHNAK2    |
| 529 | ENSG00000115392 | FANCL     |
| 530 | ENSG00000183741 | CBX6      |
| 531 | ENSG00000104783 | KCNN4     |
| 532 | ENSG00000178343 | SHISA3    |
| 533 | ENSG00000122566 | HNRNPA2B1 |
| 534 | ENSG00000146592 | CREB5     |
| 535 | ENSG00000187741 | FANCA     |
| 536 | ENSG00000161011 | SQSTM1    |
| 537 | ENSG00000151692 | RNF144A   |
| 538 | ENSG00000105325 | FZR1      |
| 539 | ENSG00000096384 | HSP90AB1  |
| 540 | ENSG00000153395 | LPCAT1    |
| 541 | ENSG00000138658 | ZGRF1     |
| 542 | ENSG00000116062 | MSH6      |

|     |                 |              |
|-----|-----------------|--------------|
| 543 | ENSG00000207357 | RNU6-2       |
| 544 | ENSG00000119397 | CNTRL        |
| 545 | ENSG00000125871 | MGME1        |
| 546 | ENSG00000168496 | FEN1         |
| 547 | ENSG00000108518 | PFN1         |
| 548 | ENSG00000104047 | DTWD1        |
| 549 | ENSG00000184349 | EFNA5        |
| 550 | ENSG00000182010 | RTKN2        |
| 551 | ENSG00000167565 | SERTAD3      |
| 552 | ENSG00000119333 | DYNC2I2      |
| 553 | ENSG00000130844 | ZNF331       |
| 554 | ENSG00000109062 | SLC9A3R1     |
| 555 | ENSG00000143878 | RHOB         |
| 556 | ENSG00000131652 | THOC6        |
| 557 | ENSG00000198900 | TOP1         |
| 558 | ENSG00000167670 | CHAF1A       |
| 559 | ENSG00000137727 | ARHGAP20     |
| 560 | ENSG00000165732 | DDX21        |
| 561 | ENSG00000081320 | STK17B       |
| 562 | ENSG00000099194 | SCD          |
| 563 | ENSG00000116679 | IVNS1ABP     |
| 564 | ENSG00000099810 | MTAP         |
| 565 | ENSG00000277778 | PGM5P2       |
| 566 | ENSG00000143228 | NUF2         |
| 567 | ENSG00000213186 | TRIM59       |
| 568 | ENSG00000189060 | H1-0         |
| 569 | ENSG00000128944 | KNSTRN       |
| 570 | ENSG00000177084 | POLE         |
| 571 | ENSG00000014138 | POLA2        |
| 572 | ENSG00000144381 | HSPD1        |
| 573 | ENSG00000084733 | RAB10        |
| 574 | ENSG00000277161 | PIGW         |
| 575 | ENSG00000275616 | LOC124904135 |
| 576 | ENSG00000198355 | PIM3         |
| 577 | ENSG00000274862 | LOC124904141 |
| 578 | ENSG00000130669 | PAK4         |
| 579 | ENSG00000185803 | SLC52A2      |
| 580 | ENSG00000081019 | RSBN1        |
| 581 | ENSG00000228716 | DHFR         |
| 582 | ENSG00000157456 | CCNB2        |
| 583 | ENSG00000274585 | RNU2-1       |
| 584 | ENSG00000144395 | CCDC150      |

|     |                 |              |
|-----|-----------------|--------------|
| 585 | ENSG00000115159 | GPD2         |
| 586 | ENSG00000111859 | NEDD9        |
| 587 | ENSG00000124422 | USP22        |
| 588 | ENSG00000142149 | HUNK         |
| 589 | ENSG00000092853 | CLSPN        |
| 590 | ENSG00000129355 | CDKN2D       |
| 591 | ENSG00000120053 | GOT1         |
| 592 | ENSG00000181544 | FANCB        |
| 593 | ENSG00000119771 | KLHL29       |
| 594 | ENSG00000139354 | GAS2L3       |
| 595 | ENSG00000176208 | ATAD5        |
| 596 | ENSG00000166004 | CEP295       |
| 597 | ENSG00000186871 | ERCC6L       |
| 598 | ENSG00000158201 | ABHD3        |
| 599 | ENSG00000274432 | LOC124904137 |
| 600 | ENSG00000131351 | HAUS8        |
| 601 | ENSG00000168010 | ATG16L2      |
| 602 | ENSG00000183763 | TRAIIP       |
| 603 | ENSG00000278048 | LOC124904138 |
| 604 | ENSG00000172667 | ZMAT3        |
| 605 | ENSG00000139734 | DIAPH3       |
| 606 | ENSG00000112081 | SRSF3        |
| 607 | ENSG00000107816 | LZTS2        |
| 608 | ENSG00000076382 | SPAG5        |
| 609 | ENSG00000175455 | CCDC14       |
| 610 | ENSG00000115541 | HSPE1        |
| 611 | ENSG00000277903 | LOC124904140 |
| 612 | ENSG00000206899 | RNU6-36P     |
| 613 | ENSG00000118523 | CCN2         |
| 614 | ENSG00000173846 | PLK3         |
| 615 | ENSG00000149503 | INCENP       |
| 616 | ENSG00000092470 | WDR76        |
| 617 | ENSG00000183150 | GPR19        |
| 618 | ENSG00000122641 | INHBA        |
| 619 | ENSG00000167011 | NAT16        |
| 620 | ENSG00000162772 | ATF3         |
| 621 | ENSG00000123219 | CENPK        |
| 622 | ENSG00000128340 | RAC2         |
| 623 | ENSG00000285730 | Pseudogene   |
| 624 | ENSG00000140400 | MAN2C1       |
| 625 | ENSG00000278591 | LOC124904144 |
| 626 | ENSG00000138092 | CENPO        |

|     |                 |                 |
|-----|-----------------|-----------------|
| 627 | ENSG00000186834 | HEXIM1          |
| 628 | ENSG00000145241 | CENPC           |
| 629 | ENSG00000132780 | NASP            |
| 630 | ENSG00000112414 | ADGRG6          |
| 631 | ENSG00000177879 | AP3S1           |
| 632 | ENSG00000138496 | PARP9           |
| 633 | ENSG00000274062 | LOC124904142    |
| 634 | ENSG00000138376 | BARD1           |
| 635 | ENSG00000217555 | CKLF            |
| 636 | ENSG00000214944 | ARHGEF28        |
| 637 | ENSG00000162783 | IER5            |
| 638 | ENSG00000273709 | LOC124904136    |
| 639 | ENSG00000095002 | MSH2            |
| 640 | ENSG00000171421 | MRPL36          |
| 641 | ENSG00000203811 | H3C14           |
| 642 | ENSG00000255152 | MSH5-<br>SAPCD1 |
| 643 | ENSG00000117713 | ARID1A          |
| 644 | ENSG00000206932 | RNU6-4P         |
| 645 | ENSG00000155506 | LARP1           |
| 646 | ENSG00000276966 | H4C5            |
| 647 | ENSG00000137936 | BCAR3           |
| 648 | ENSG00000143942 | CHAC2           |
| 649 | ENSG00000160113 | NR2F6           |
| 650 | ENSG00000152117 | SMPD4BP         |
| 651 | ENSG00000140534 | TICRR           |
| 652 | ENSG00000082438 | COBLL1          |
| 653 | ENSG00000095383 | TBC1D2          |
| 654 | ENSG00000237649 | KIFC1           |
| 655 | ENSG00000139618 | BRCA2           |
| 656 | ENSG00000172244 | C5orf34         |
| 657 | ENSG00000131435 | PDLIM4          |
| 658 | ENSG00000206965 | RNU6-5P         |
| 659 | ENSG00000189337 | KAZN            |
| 660 | ENSG00000174738 | NR1D2           |
| 661 | ENSG00000151503 | NCAPD3          |
| 662 | ENSG00000135334 | AKIRIN2         |
| 663 | ENSG00000144354 | CDCA7           |
| 664 | ENSG00000154920 | EME1            |
| 665 | ENSG00000137497 | NUMA1           |
| 666 | ENSG00000275219 | LOC124904143    |
| 667 | ENSG00000214826 | DDX12P          |



|     |                 |              |
|-----|-----------------|--------------|
| 668 | ENSG00000214776 | Pseudogene   |
| 669 | ENSG00000148248 | SURF4        |
| 670 | ENSG00000172765 | TMCC1        |
| 671 | ENSG00000068885 | IFT80        |
| 672 | ENSG00000221978 | CCNL2        |
| 673 | ENSG00000175265 | GOLGA8A      |
| 674 | ENSG00000066279 | ASPM         |
| 675 | ENSG00000214357 | NEURL1B      |
| 676 | ENSG00000163072 | NOSTRIN      |
| 677 | ENSG00000177602 | HASPIN       |
| 678 | ENSG00000276596 | LOC124904139 |
| 679 | ENSG00000169252 | ADRB2        |
| 680 | ENSG00000128294 | TPST2        |
| 681 | ENSG00000181722 | ZBTB20       |
| 682 | ENSG00000178295 | GEN1         |
| 683 | ENSG00000204388 | HSPA1B       |
| 684 | ENSG00000001460 | STPG1        |
| 685 | ENSG00000111276 | CDKN1B       |
| 686 | ENSG00000111788 | Pseudogene   |
| 687 | ENSG00000111696 | NT5DC3       |
| 688 | ENSG00000134222 | PSRC1        |
| 689 | ENSG00000149639 | SOGA1        |
| 690 | ENSG00000156463 | SH3RF2       |
| 691 | ENSG00000154839 | SKA1         |
| 692 | ENSG00000161692 | DBF4B        |
| 693 | ENSG00000160949 | TONSL        |
| 694 | ENSG00000160298 | C21orf58     |
| 695 | ENSG00000162419 | GMEB1        |
| 696 | ENSG00000164796 | CSMD3        |
| 697 | ENSG00000165494 | PCF11        |
| 698 | ENSG00000167513 | CDT1         |
| 699 | ENSG00000168282 | MGAT2        |
| 700 | ENSG00000169188 | APEX2        |
| 701 | ENSG00000171105 | INSR         |
| 702 | ENSG00000172167 | MTBP         |
| 703 | ENSG00000089693 | MLF2         |
| 704 | ENSG00000177595 | PIDD1        |
| 705 | ENSG00000180611 | MB21D2       |
| 706 | ENSG00000184445 | KNTC1        |
| 707 | ENSG00000184992 | BRI3BP       |
| 708 | ENSG00000187266 | EPOR         |
| 709 | ENSG00000186767 | SPIN4        |

|     |                 |            |
|-----|-----------------|------------|
| 710 | ENSG00000283269 | Pseudogene |
| 711 | ENSG00000070882 | OSBPL3     |
| 712 | ENSG00000146555 | SDK1       |
| 713 | ENSG00000153048 | CARHSP1    |
| 714 | ENSG00000144048 | DUSP11     |
| 715 | ENSG00000215252 | GOLGA8B    |
| 716 | ENSG00000125885 | MCM8       |
| 717 | ENSG00000182752 | PAPPA      |
| 718 | ENSG00000250067 | YJEFN3     |
| 719 | ENSG00000168476 | REEP4      |
| 720 | ENSG00000127564 | PKMYT1     |
| 721 | ENSG00000160957 | RECQL4     |
| 722 | ENSG00000135185 | TMEM243    |
| 723 | ENSG00000162222 | TTC9C      |
| 724 | ENSG00000079616 | KIF22      |
| 725 | ENSG00000170852 | KBTBD2     |
| 726 | ENSG00000174136 | RGMB       |
| 727 | ENSG00000142765 | SYTL1      |
| 728 | ENSG00000196235 | SUPT5H     |
| 729 | ENSG00000171792 | RHNO1      |
| 730 | ENSG00000169683 | LRRC45     |
| 731 | ENSG00000166925 | TSC22D4    |
| 732 | ENSG00000026103 | FAS        |
| 733 | ENSG00000162929 | SANBR      |
| 734 | ENSG00000183955 | KMT5A      |
| 735 | ENSG00000075131 | TIPIN      |
| 736 | ENSG00000127586 | CHTF18     |
| 737 | ENSG00000205560 | CPT1B      |
| 738 | ENSG00000134030 | CTIF       |
| 739 | ENSG00000187837 | H1-2       |
| 740 | ENSG00000151276 | MAGI1      |
| 741 | ENSG00000143631 | FLG        |
| 742 | ENSG00000184602 | SNN        |
| 743 | ENSG00000170160 | CCDC144A   |
| 744 | ENSG00000284946 | Pseudogene |
| 745 | ENSG00000004897 | CDC27      |
| 746 | ENSG00000100629 | CEP128     |
| 747 | ENSG00000067082 | KLF6       |
| 748 | ENSG00000175216 | CKAP5      |
| 749 | ENSG00000181467 | RAP2B      |
| 750 | ENSG00000183726 | TMEM50A    |
| 751 | ENSG00000183814 | LIN9       |

|     |                 |           |
|-----|-----------------|-----------|
| 752 | ENSG00000143322 | ABL2      |
| 753 | ENSG00000165244 | ZNF367    |
| 754 | ENSG00000138778 | CENPE     |
| 755 | ENSG00000167747 | C19orf48  |
| 756 | ENSG00000171940 | ZNF217    |
| 757 | ENSG00000169689 | CENPX     |
| 758 | ENSG00000114861 | FOXP1     |
| 759 | ENSG00000143217 | NECTIN4   |
| 760 | ENSG00000137818 | RPLP1     |
| 761 | ENSG00000142102 | PGGHG     |
| 762 | ENSG00000185361 | TNFAIP8L1 |
| 763 | ENSG00000176148 | TCP11L1   |
| 764 | ENSG00000184156 | KCNQ3     |
| 765 | ENSG00000170759 | KIF5B     |
| 766 | ENSG00000124762 | CDKN1A    |
| 767 | ENSG00000185324 | CDK10     |
| 768 | ENSG00000164109 | MAD2L1    |
| 769 | ENSG00000167900 | TK1       |
| 770 | ENSG00000169813 | HNRNPF    |
| 771 | ENSG00000162521 | RBBP4     |
| 772 | ENSG00000198258 | UBL5      |
| 773 | ENSG00000075391 | RASAL2    |
| 774 | ENSG00000111445 | RFC5      |
| 775 | ENSG00000133454 | MYO18B    |
| 776 | ENSG00000124207 | CSE1L     |
| 777 | ENSG00000145604 | SKP2      |
| 778 | ENSG00000074696 | HACD3     |
| 779 | ENSG00000112312 | GMNN      |
| 780 | ENSG00000145495 | MARCHF6   |
| 781 | ENSG00000145425 | RPS3A     |
| 782 | ENSG00000188549 | CCDC9B    |
| 783 | ENSG00000169021 | UQCRFS1   |
| 784 | ENSG00000066322 | ELOVL1    |
| 785 | ENSG00000140264 | SERF2     |
| 786 | ENSG00000204435 | CSNK2B    |
| 787 | ENSG00000110108 | TMEM109   |
| 788 | ENSG00000077549 | CAPZB     |

(2) Feature list yielded by MCFS method

| Rank | Ensembl ID      | Gene symbol |
|------|-----------------|-------------|
| 1    | ENSG00000170312 | CDK1        |
| 2    | ENSG00000175063 | UBE2C       |
| 3    | ENSG00000197061 | H4C3        |

|    |                 |            |
|----|-----------------|------------|
| 4  | ENSG00000123485 | HJURP      |
| 5  | ENSG00000131747 | TOP2A      |
| 6  | ENSG00000112029 | FBXO5      |
| 7  | ENSG00000186185 | KIF18B     |
| 8  | ENSG00000101447 | FAM83D     |
| 9  | ENSG00000146670 | CDCA5      |
| 10 | ENSG00000166801 | FAM111A    |
| 11 | ENSG00000140451 | PIF1       |
| 12 | ENSG00000182481 | KPNA2      |
| 13 | ENSG00000274997 | H2AC12     |
| 14 | ENSG00000169607 | CKAP2L     |
| 15 | ENSG00000189057 | FAM111B    |
| 16 | ENSG00000171320 | ESCO2      |
| 17 | ENSG00000276368 | H2AC14     |
| 18 | ENSG00000137807 | KIF23      |
| 19 | ENSG00000122952 | ZWINT      |
| 20 | ENSG00000134057 | CCNB1      |
| 21 | ENSG00000178999 | AURKB      |
| 22 | ENSG00000184661 | CDCA2      |
| 23 | ENSG00000162063 | CCNF       |
| 24 | ENSG00000171848 | RRM2       |
| 25 | ENSG00000117399 | CDC20      |
| 26 | ENSG00000115641 | FHL2       |
| 27 | ENSG00000173207 | CKS1B      |
| 28 | ENSG00000132646 | PCNA       |
| 29 | ENSG00000051341 | POLQ       |
| 30 | ENSG00000156802 | ATAD2      |
| 31 | ENSG00000134690 | CDCA8      |
| 32 | ENSG00000168298 | H1-4       |
| 33 | ENSG00000145386 | CCNA2      |
| 34 | ENSG00000121152 | NCAPH      |
| 35 | ENSG00000131475 | VPS25      |
| 36 | ENSG00000174371 | EXO1       |
| 37 | ENSG00000165304 | MELK       |
| 38 | ENSG00000229089 | ANKRD20A8P |
| 39 | ENSG00000175305 | CCNE2      |
| 40 | ENSG00000164104 | HMGB2      |
| 41 | ENSG00000168496 | FEN1       |
| 42 | ENSG00000123975 | CKS2       |
| 43 | ENSG00000157456 | CCNB2      |
| 44 | ENSG00000170540 | ARL6IP1    |
| 45 | ENSG00000077152 | UBE2T      |

|    |                 |           |
|----|-----------------|-----------|
| 46 | ENSG00000148773 | MKI67     |
| 47 | ENSG00000214357 | NEURL1B   |
| 48 | ENSG00000166851 | PLK1      |
| 49 | ENSG00000105173 | CCNE1     |
| 50 | ENSG00000112118 | MCM3      |
| 51 | ENSG00000123473 | STIL      |
| 52 | ENSG00000100297 | MCM5      |
| 53 | ENSG00000076248 | UNG       |
| 54 | ENSG00000080986 | NDC80     |
| 55 | ENSG00000085999 | RAD54L    |
| 56 | ENSG00000112984 | KIF20A    |
| 57 | ENSG00000087586 | AURKA     |
| 58 | ENSG00000075218 | GTSE1     |
| 59 | ENSG00000185361 | TNFAIP8L1 |
| 60 | ENSG00000093009 | CDC45     |
| 61 | ENSG00000183856 | IQGAP3    |
| 62 | ENSG00000198331 | HYLS1     |
| 63 | ENSG00000088325 | TPX2      |
| 64 | ENSG00000124610 | H1-1      |
| 65 | ENSG00000128944 | KNSTRN    |
| 66 | ENSG00000118193 | KIF14     |
| 67 | ENSG00000102384 | CENPI     |
| 68 | ENSG00000136982 | DSCC1     |
| 69 | ENSG00000259848 | LOC442028 |
| 70 | ENSG00000094804 | CDC6      |
| 71 | ENSG00000121716 | PILRB     |
| 72 | ENSG00000111665 | CDCA3     |
| 73 | ENSG00000177943 | MAMDC4    |
| 74 | ENSG00000134222 | PSRC1     |
| 75 | ENSG00000164611 | PTTG1     |
| 76 | ENSG00000076003 | MCM6      |
| 77 | ENSG00000100100 | PIK3IP1   |
| 78 | ENSG00000143228 | NUF2      |
| 79 | ENSG00000104738 | MCM4      |
| 80 | ENSG00000138160 | KIF11     |
| 81 | ENSG00000137310 | TCF19     |
| 82 | ENSG00000109674 | NEIL3     |
| 83 | ENSG00000105011 | ASF1B     |
| 84 | ENSG00000116062 | MSH6      |
| 85 | ENSG00000117650 | NEK2      |
| 86 | ENSG00000146410 | MTFR2     |
| 87 | ENSG00000088986 | DYNLL1    |

|     |                 |          |
|-----|-----------------|----------|
| 88  | ENSG00000175265 | GOLGA8A  |
| 89  | ENSG00000125319 | HROB     |
| 90  | ENSG00000142945 | KIF2C    |
| 91  | ENSG00000139734 | DIAPH3   |
| 92  | ENSG00000149503 | INCENP   |
| 93  | ENSG00000196787 | H2AC11   |
| 94  | ENSG00000135451 | TROAP    |
| 95  | ENSG00000117724 | CENPF    |
| 96  | ENSG00000111247 | RAD51AP1 |
| 97  | ENSG00000223564 | CYP4F32P |
| 98  | ENSG00000092853 | CLSPN    |
| 99  | ENSG00000166803 | PCLAF    |
| 100 | ENSG00000012048 | BRCA1    |
| 101 | ENSG00000184678 | H2BC21   |
| 102 | ENSG00000167553 | TUBA1C   |
| 103 | ENSG00000130844 | ZNF331   |
| 104 | ENSG00000144048 | DUSP11   |
| 105 | ENSG00000237649 | KIFC1    |
| 106 | ENSG00000235571 | SNX18P14 |
| 107 | ENSG00000163918 | RFC4     |
| 108 | ENSG00000127564 | PKMYT1   |
| 109 | ENSG00000007968 | E2F2     |
| 110 | ENSG00000198056 | PRIM1    |
| 111 | ENSG00000177426 | TGIF1    |
| 112 | ENSG00000169679 | BUB1     |
| 113 | ENSG00000165490 | DDIAS    |
| 114 | ENSG00000131153 | GINS2    |
| 115 | ENSG00000231007 | CDC20P1  |
| 116 | ENSG00000168078 | PBK      |
| 117 | ENSG00000137804 | NUSAP1   |
| 118 | ENSG00000196230 | TUBB     |
| 119 | ENSG00000073111 | MCM2     |
| 120 | ENSG00000101104 | PABPC1L  |
| 121 | ENSG00000173848 | NET1     |
| 122 | ENSG00000091651 | ORC6     |
| 123 | ENSG00000276966 | H4C5     |
| 124 | ENSG00000014138 | POLA2    |
| 125 | ENSG00000156970 | BUB1B    |
| 126 | ENSG00000140534 | TICRR    |
| 127 | ENSG00000161888 | SPC24    |
| 128 | ENSG00000101224 | CDC25B   |
| 129 | ENSG00000108106 | UBE2S    |

|     |                 |            |
|-----|-----------------|------------|
| 130 | ENSG00000135476 | ESPL1      |
| 131 | ENSG00000143933 | CALM2      |
| 132 | ENSG00000146278 | PNRC1      |
| 133 | ENSG00000176890 | TYMS       |
| 134 | ENSG00000125871 | MGME1      |
| 135 | ENSG00000282988 | Pseudogene |
| 136 | ENSG00000116717 | GADD45A    |
| 137 | ENSG00000125885 | MCM8       |
| 138 | ENSG00000138376 | BARD1      |
| 139 | ENSG00000152253 | SPC25      |
| 140 | ENSG00000109971 | HSPA8      |
| 141 | ENSG00000124216 | SNAI1      |
| 142 | ENSG00000164109 | MAD2L1     |
| 143 | ENSG00000095383 | TBC1D2     |
| 144 | ENSG00000173456 | RNF26      |
| 145 | ENSG00000154839 | SKA1       |
| 146 | ENSG00000163950 | SLBP       |
| 147 | ENSG00000160298 | C21orf58   |
| 148 | ENSG00000092470 | WDR76      |
| 149 | ENSG00000116830 | TTF2       |
| 150 | ENSG00000112742 | TTK        |
| 151 | ENSG00000142102 | PGGHG      |
| 152 | ENSG00000188486 | H2AX       |
| 153 | ENSG00000113369 | ARRDC3     |
| 154 | ENSG00000136492 | BRIP1      |
| 155 | ENSG00000066279 | ASPM       |
| 156 | ENSG00000125898 | FAM110A    |
| 157 | ENSG00000072571 | HMMR       |
| 158 | ENSG00000101412 | E2F1       |
| 159 | ENSG00000126787 | DLGAP5     |
| 160 | ENSG00000183150 | GPR19      |
| 161 | ENSG00000115163 | CENPA      |
| 162 | ENSG00000188229 | TUBB4B     |
| 163 | ENSG00000213347 | MXD3       |
| 164 | ENSG00000169188 | APEX2      |
| 165 | ENSG00000143217 | NECTIN4    |
| 166 | ENSG00000065328 | MCM10      |
| 167 | ENSG00000120802 | TMPO       |
| 168 | ENSG00000198033 | TUBA3C     |
| 169 | ENSG00000081320 | STK17B     |
| 170 | ENSG00000165480 | SKA3       |
| 171 | ENSG00000167513 | CDT1       |

|     |                 |          |
|-----|-----------------|----------|
| 172 | ENSG00000185324 | CDK10    |
| 173 | ENSG00000100526 | CDKN3    |
| 174 | ENSG00000138180 | CEP55    |
| 175 | ENSG00000049192 | ADAMTS6  |
| 176 | ENSG00000138658 | ZGRF1    |
| 177 | ENSG00000120539 | MASTL    |
| 178 | ENSG00000171241 | SHCBP1   |
| 179 | ENSG00000100097 | LGALS1   |
| 180 | ENSG00000175130 | MARCKSL1 |
| 181 | ENSG00000175455 | CCDC14   |
| 182 | ENSG00000118523 | CCN2     |
| 183 | ENSG00000138346 | DNA2     |
| 184 | ENSG00000171793 | CTPS1    |
| 185 | ENSG00000122483 | CCDC18   |
| 186 | ENSG00000129534 | MIS18BP1 |
| 187 | ENSG00000136122 | BORA     |
| 188 | ENSG00000167978 | SRRM2    |
| 189 | ENSG00000091164 | TXNL1    |
| 190 | ENSG00000084733 | RAB10    |
| 191 | ENSG00000144354 | CDCA7    |
| 192 | ENSG00000127483 | HP1BP3   |
| 193 | ENSG00000121621 | KIF18A   |
| 194 | ENSG00000188985 | DHFRP1   |
| 195 | ENSG00000150991 | UBC      |
| 196 | ENSG00000106367 | AP1S1    |
| 197 | ENSG00000128016 | ZFP36    |
| 198 | ENSG00000051180 | RAD51    |
| 199 | ENSG00000249859 | PVT1     |
| 200 | ENSG00000137135 | ARHGEF39 |
| 201 | ENSG00000152518 | ZFP36L2  |
| 202 | ENSG00000149636 | DSN1     |
| 203 | ENSG00000170734 | POLH     |
| 204 | ENSG00000141232 | TOB1     |
| 205 | ENSG00000090889 | KIF4A    |
| 206 | ENSG00000138778 | CENPE    |
| 207 | ENSG00000126368 | NR1D1    |
| 208 | ENSG00000129810 | SGO1     |
| 209 | ENSG00000121957 | GPSM2    |
| 210 | ENSG00000128340 | RAC2     |
| 211 | ENSG00000196866 | H2AC7    |
| 212 | ENSG00000205352 | PRR13    |
| 213 | ENSG00000178719 | GRINA    |



|     |                 |            |
|-----|-----------------|------------|
| 214 | ENSG00000167900 | TK1        |
| 215 | ENSG00000078900 | TP73       |
| 216 | ENSG00000089685 | BIRC5      |
| 217 | ENSG00000232502 | Pseudogene |
| 218 | ENSG00000168476 | REEP4      |
| 219 | ENSG00000163072 | NOSTRIN    |
| 220 | ENSG00000162073 | PAQR4      |
| 221 | ENSG00000143476 | DTL        |
| 222 | ENSG00000077514 | POLD3      |
| 223 | ENSG00000123219 | CENPK      |
| 224 | ENSG00000105355 | PLIN3      |
| 225 | ENSG00000144554 | FANCD2     |
| 226 | ENSG00000136108 | CKAP2      |
| 227 | ENSG00000183864 | TOB2       |
| 228 | ENSG00000139211 | AMIGO2     |
| 229 | ENSG00000115392 | FANCL      |
| 230 | ENSG00000013573 | DDX11      |
| 231 | ENSG00000163535 | SGO2       |
| 232 | ENSG00000277778 | PGM5P2     |
| 233 | ENSG00000165891 | E2F7       |
| 234 | ENSG00000166483 | WEE1       |
| 235 | ENSG00000067082 | KLF6       |
| 236 | ENSG00000165244 | ZNF367     |
| 237 | ENSG00000117139 | KDM5B      |
| 238 | ENSG00000118263 | KLF7       |
| 239 | ENSG00000102362 | SYTL4      |
| 240 | ENSG00000146592 | CREB5      |
| 241 | ENSG00000123416 | TUBA1B     |
| 242 | ENSG00000186767 | SPIN4      |
| 243 | ENSG00000167601 | AXL        |
| 244 | ENSG00000164754 | RAD21      |
| 245 | ENSG00000138182 | KIF20B     |
| 246 | ENSG00000115738 | ID2        |
| 247 | ENSG00000111859 | NEDD9      |
| 248 | ENSG00000175573 | C11orf68   |
| 249 | ENSG00000137812 | KNL1       |
| 250 | ENSG00000132475 | H3-3B      |
| 251 | ENSG00000096093 | EFHC1      |
| 252 | ENSG00000159335 | PTMS       |
| 253 | ENSG00000144227 | NXPH2      |
| 254 | ENSG00000145241 | CENPC      |
| 255 | ENSG00000198900 | TOP1       |

|     |                 |            |
|-----|-----------------|------------|
| 256 | ENSG00000221829 | FANCG      |
| 257 | ENSG00000178607 | ERN1       |
| 258 | ENSG00000263513 | FAM72C     |
| 259 | ENSG00000165502 | RPL36AL    |
| 260 | ENSG00000187051 | RPS19BP1   |
| 261 | ENSG00000119801 | YPEL5      |
| 262 | ENSG00000143322 | ABL2       |
| 263 | ENSG00000070950 | RAD18      |
| 264 | ENSG00000166002 | SMCO4      |
| 265 | ENSG00000284906 | ARHGAP11B  |
| 266 | ENSG00000138092 | CENPO      |
| 267 | ENSG00000129195 | PIMREG     |
| 268 | ENSG00000203811 | H3C14      |
| 269 | ENSG00000169242 | EFNA1      |
| 270 | ENSG00000198901 | PRC1       |
| 271 | ENSG00000040275 | SPDL1      |
| 272 | ENSG00000187741 | FANCA      |
| 273 | ENSG00000156463 | SH3RF2     |
| 274 | ENSG00000013810 | TACC3      |
| 275 | ENSG00000088305 | DNMT3B     |
| 276 | ENSG00000140264 | SERF2      |
| 277 | ENSG00000121211 | MND1       |
| 278 | ENSG00000100242 | SUN2       |
| 279 | ENSG00000100629 | CEP128     |
| 280 | ENSG00000120694 | HSPH1      |
| 281 | ENSG00000170779 | CDCA4      |
| 282 | ENSG00000169683 | LRRC45     |
| 283 | ENSG00000171223 | JUNB       |
| 284 | ENSG00000184445 | KNTC1      |
| 285 | ENSG00000106462 | EZH2       |
| 286 | ENSG00000117069 | ST6GALNAC5 |
| 287 | ENSG00000126945 | HNRNPH2    |
| 288 | ENSG00000213853 | EMP2       |
| 289 | ENSG00000170425 | ADORA2B    |
| 290 | ENSG00000131470 | PSMC3IP    |
| 291 | ENSG00000101773 | RBBP8      |
| 292 | ENSG00000122641 | INHBA      |
| 293 | ENSG00000188549 | CCDC9B     |
| 294 | ENSG00000076382 | SPAG5      |
| 295 | ENSG00000167325 | RRM1       |
| 296 | ENSG00000160957 | RECQL4     |
| 297 | ENSG00000075391 | RASAL2     |

|     |                 |           |
|-----|-----------------|-----------|
| 298 | ENSG00000133121 | STARD13   |
| 299 | ENSG00000181722 | ZBTB20    |
| 300 | ENSG00000128294 | TPST2     |
| 301 | ENSG00000198826 | ARHGAP11A |
| 302 | ENSG00000154473 | BUB3      |
| 303 | ENSG00000115946 | PNO1      |
| 304 | ENSG00000024526 | DEPDC1    |
| 305 | ENSG00000104267 | CA2       |
| 306 | ENSG00000103995 | CEP152    |
| 307 | ENSG00000119969 | HELLS     |
| 308 | ENSG00000162231 | NXF1      |
| 309 | ENSG00000172765 | TMCC1     |
| 310 | ENSG00000011426 | ANLN      |
| 311 | ENSG00000139697 | SBNO1     |
| 312 | ENSG00000133454 | MYO18B    |
| 313 | ENSG00000124766 | SOX4      |
| 314 | ENSG00000130299 | GTPBP3    |
| 315 | ENSG00000205212 | CCDC144NL |
| 316 | ENSG00000117713 | ARID1A    |
| 317 | ENSG00000054654 | SYNE2     |
| 318 | ENSG00000180304 | OAZ2      |
| 319 | ENSG00000106211 | HSPB1     |
| 320 | ENSG00000115541 | HSPE1     |
| 321 | ENSG00000250067 | YJEFN3    |
| 322 | ENSG00000177602 | HASPIN    |
| 323 | ENSG00000123146 | ADGRE5    |
| 324 | ENSG00000176222 | ZNF404    |
| 325 | ENSG00000162783 | IER5      |
| 326 | ENSG00000182010 | RTKN2     |
| 327 | ENSG00000075618 | FSCN1     |
| 328 | ENSG00000178913 | TAF7      |
| 329 | ENSG00000160949 | TONSL     |
| 330 | ENSG00000095777 | MYO3A     |
| 331 | ENSG00000101608 | MYL12A    |
| 332 | ENSG00000183741 | CBX6      |
| 333 | ENSG00000111445 | RFC5      |
| 334 | ENSG00000111696 | NT5DC3    |
| 335 | ENSG00000185803 | SLC52A2   |
| 336 | ENSG00000111206 | FOXMI     |
| 337 | ENSG00000186193 | SAPCD2    |
| 338 | ENSG00000198763 | ND2       |
| 339 | ENSG00000134291 | TMEM106C  |

|     |                 |           |
|-----|-----------------|-----------|
| 340 | ENSG00000101003 | GIN51     |
| 341 | ENSG00000197172 | MAGEA6    |
| 342 | ENSG00000100941 | PNN       |
| 343 | ENSG00000204382 | XAGE1B    |
| 344 | ENSG00000143631 | FLG       |
| 345 | ENSG00000180573 | H2AC6     |
| 346 | ENSG00000013588 | GPRC5A    |
| 347 | ENSG00000122565 | CBX3      |
| 348 | ENSG00000006327 | TNFRSF12A |
| 349 | ENSG00000099194 | SCD       |
| 350 | ENSG00000178343 | SHISA3    |
| 351 | ENSG00000114315 | HES1      |
| 352 | ENSG00000135334 | AKIRIN2   |
| 353 | ENSG00000175216 | CKAP5     |
| 354 | ENSG00000154640 | BTG3      |
| 355 | ENSG00000169490 | TM2D2     |
| 356 | ENSG00000109805 | NCAPG     |
| 357 | ENSG00000184602 | SNN       |
| 358 | ENSG00000119333 | DYNC2I2   |
| 359 | ENSG00000101057 | MYBL2     |
| 360 | ENSG00000120334 | CENPL     |
| 361 | ENSG00000232388 | SMIM26    |
| 362 | ENSG00000130429 | ARPC1B    |
| 363 | ENSG00000256618 | MTRNR2L1  |
| 364 | ENSG00000170889 | RPS9      |
| 365 | ENSG00000213024 | NUP62     |
| 366 | ENSG00000221978 | CCNL2     |
| 367 | ENSG00000128951 | DUT       |
| 368 | ENSG00000167011 | NAT16     |
| 369 | ENSG00000161800 | RACGAP1   |
| 370 | ENSG00000168140 | VASN      |
| 371 | ENSG00000101945 | SUV39H1   |
| 372 | ENSG00000185787 | MORF4L1   |
| 373 | ENSG00000148677 | ANKRD1    |
| 374 | ENSG00000214756 | CSKMT     |
| 375 | ENSG00000184349 | EFNA5     |
| 376 | ENSG00000170264 | FAM161A   |
| 377 | ENSG00000171421 | MRPL36    |
| 378 | ENSG00000184992 | BRI3BP    |
| 379 | ENSG00000228716 | DHFR      |
| 380 | ENSG00000163808 | KIF15     |
| 381 | ENSG00000117450 | PRDX1     |

|     |                 |              |
|-----|-----------------|--------------|
| 382 | ENSG00000214776 | Pseudogene   |
| 383 | ENSG00000278591 | LOC124904144 |
| 384 | ENSG00000133119 | RFC3         |
| 385 | ENSG00000127922 | SEM1         |
| 386 | ENSG00000168010 | ATG16L2      |
| 387 | ENSG00000104147 | OIP5         |
| 388 | ENSG00000149548 | CCDC15       |
| 389 | ENSG00000131652 | THOC6        |
| 390 | ENSG00000134375 | TIMM17A      |
| 391 | ENSG00000145604 | SKP2         |
| 392 | ENSG00000129474 | AJUBA        |
| 393 | ENSG00000181467 | RAP2B        |
| 394 | ENSG00000114346 | ECT2         |
| 395 | ENSG00000025770 | NCAPH2       |
| 396 | ENSG00000166508 | MCM7         |
| 397 | ENSG00000119669 | IRF2BPL      |
| 398 | ENSG00000164796 | CSMD3        |
| 399 | ENSG00000235109 | ZSCAN31      |
| 400 | ENSG00000171792 | RHNO1        |
| 401 | ENSG00000140319 | SRP14        |
| 402 | ENSG00000066322 | ELOVL1       |
| 403 | ENSG00000184260 | H2AC20       |
| 404 | ENSG00000056097 | ZFR          |
| 405 | ENSG00000276596 | LOC124904139 |
| 406 | ENSG00000162419 | GMEB1        |
| 407 | ENSG00000176148 | TCP11L1      |
| 408 | ENSG00000154920 | EME1         |
| 409 | ENSG00000113810 | SMC4         |
| 410 | ENSG00000135185 | TMEM243      |
| 411 | ENSG00000140443 | IGF1R        |
| 412 | ENSG00000128510 | CPA4         |
| 413 | ENSG00000124762 | CDKN1A       |
| 414 | ENSG00000275219 | LOC124904143 |
| 415 | ENSG00000149257 | SERPINH1     |
| 416 | ENSG00000124422 | USP22        |
| 417 | ENSG00000178074 | C2orf69      |
| 418 | ENSG00000006634 | DBF4         |
| 419 | ENSG00000178966 | RMI1         |
| 420 | ENSG00000139618 | BRCA2        |
| 421 | ENSG00000151466 | SCLT1        |
| 422 | ENSG00000100714 | MTHFD1       |
| 423 | ENSG00000117318 | ID3          |

|     |                 |              |
|-----|-----------------|--------------|
| 424 | ENSG00000274062 | LOC124904142 |
| 425 | ENSG00000034510 | TMSB10       |
| 426 | ENSG00000142731 | PLK4         |
| 427 | ENSG00000160113 | NR2F6        |
| 428 | ENSG00000274862 | LOC124904141 |
| 429 | ENSG00000275616 | LOC124904135 |
| 430 | ENSG00000197956 | S100A6       |
| 431 | ENSG00000182541 | LIMK2        |
| 432 | ENSG00000075702 | WDR62        |
| 433 | ENSG00000204899 | MZT1         |
| 434 | ENSG00000158373 | H2BC5        |
| 435 | ENSG00000172667 | ZMAT3        |
| 436 | ENSG00000118655 | DCLRE1B      |
| 437 | ENSG00000278259 | MYO19        |
| 438 | ENSG00000108518 | PFN1         |
| 439 | ENSG00000130202 | NECTIN2      |
| 440 | ENSG00000170545 | SMAGP        |
| 441 | ENSG00000102804 | TSC22D1      |
| 442 | ENSG00000278048 | LOC124904138 |
| 443 | ENSG00000130669 | PAK4         |
| 444 | ENSG00000145495 | MARCHF6      |
| 445 | ENSG00000132341 | RAN          |
| 446 | ENSG00000204435 | CSNK2B       |
| 447 | ENSG00000169813 | HNRNPF       |
| 448 | ENSG00000170759 | KIF5B        |
| 449 | ENSG00000168282 | MGAT2        |
| 450 | ENSG00000213551 | DNAJC9       |
| 451 | ENSG00000129173 | E2F8         |
| 452 | ENSG00000151503 | NCAPD3       |
| 453 | ENSG00000146263 | MMS22L       |
| 454 | ENSG00000089693 | MLF2         |
| 455 | ENSG00000010292 | NCAPD2       |
| 456 | ENSG00000186871 | ERCC6L       |
| 457 | ENSG00000107816 | LZTS2        |
| 458 | ENSG00000198554 | WDHD1        |
| 459 | ENSG00000145779 | TNFAIP8      |
| 460 | ENSG00000273709 | LOC124904136 |
| 461 | ENSG00000106305 | AIMP2        |
| 462 | ENSG00000183726 | TMEM50A      |
| 463 | ENSG00000079616 | KIF22        |
| 464 | ENSG00000132780 | NASP         |
| 465 | ENSG00000065548 | ZC3H15       |

|     |                 |              |
|-----|-----------------|--------------|
| 466 | ENSG00000178974 | FBXO34       |
| 467 | ENSG00000187266 | EPOR         |
| 468 | ENSG00000049541 | RFC2         |
| 469 | ENSG00000186834 | HEXIM1       |
| 470 | ENSG00000176208 | ATAD5        |
| 471 | ENSG00000124207 | CSE1L        |
| 472 | ENSG00000274432 | LOC124904137 |
| 473 | ENSG00000215252 | GOLGA8B      |
| 474 | ENSG00000136997 | MYC          |
| 475 | ENSG00000185650 | ZFP36L1      |
| 476 | ENSG00000196550 | FAM72A       |
| 477 | ENSG00000255152 | MSH5-SAPCD1  |
| 478 | ENSG00000139354 | GAS2L3       |
| 479 | ENSG00000111321 | LTBR         |
| 480 | ENSG00000146555 | SDK1         |
| 481 | ENSG00000162607 | USP1         |
| 482 | ENSG00000117143 | UAP1         |
| 483 | ENSG00000122644 | ARL4A        |
| 484 | ENSG00000171867 | PRNP         |
| 485 | ENSG00000151725 | CENPU        |
| 486 | ENSG00000274585 | RNU2-1       |
| 487 | ENSG00000162772 | ATF3         |
| 488 | ENSG00000285730 | Pseudogene   |
| 489 | ENSG00000171490 | RSL1D1       |
| 490 | ENSG00000198258 | UBL5         |
| 491 | ENSG00000112312 | GMNN         |
| 492 | ENSG00000109099 | PMP22        |
| 493 | ENSG00000143621 | ILF2         |
| 494 | ENSG00000026103 | FAS          |
| 495 | ENSG00000265790 | RNASEH1P1    |
| 496 | ENSG00000164211 | STARD4       |
| 497 | ENSG00000167747 | C19orf48     |
| 498 | ENSG00000135046 | ANXA1        |
| 499 | ENSG00000131446 | MGAT1        |
| 500 | ENSG00000111788 | Pseudogene   |
| 501 | ENSG00000277903 | LOC124904140 |
| 502 | ENSG00000042088 | TDP1         |
| 503 | ENSG00000172432 | GTPBP2       |
| 504 | ENSG00000183337 | BCOR         |
| 505 | ENSG00000175606 | TMEM70       |
| 506 | ENSG00000144395 | CCDC150      |
| 507 | ENSG00000153048 | CARHSP1      |

|     |                 |          |
|-----|-----------------|----------|
| 508 | ENSG00000115875 | SRSF7    |
| 509 | ENSG00000149798 | CDC42EP2 |
| 510 | ENSG00000198890 | PRMT6    |
| 511 | ENSG00000276043 | UHRF1    |
| 512 | ENSG00000197299 | BLM      |
| 513 | ENSG00000180611 | MB21D2   |
| 514 | ENSG00000138385 | SSB      |
| 515 | ENSG00000128965 | CHAC1    |
| 516 | ENSG00000124172 | ATP5F1E  |
| 517 | ENSG00000091436 | MAP3K20  |
| 518 | ENSG00000196235 | SUPT5H   |
| 519 | ENSG00000142765 | SYTL1    |
| 520 | ENSG00000102977 | ACD      |
| 521 | ENSG00000031691 | CENPQ    |
| 522 | ENSG00000138175 | ARL3     |
| 523 | ENSG00000179958 | DCTPP1   |
| 524 | ENSG00000158402 | CDC25C   |
| 525 | ENSG00000131435 | PDLIM4   |
| 526 | ENSG00000168061 | SAC3D1   |
| 527 | ENSG00000174136 | RGMB     |
| 528 | ENSG00000166004 | CEP295   |
| 529 | ENSG00000078401 | EDN1     |
| 530 | ENSG00000143761 | ARF1     |
| 531 | ENSG00000149639 | SOGA1    |
| 532 | ENSG00000137727 | ARHGAP20 |
| 533 | ENSG00000075131 | TIPIN    |
| 534 | ENSG00000162222 | TTC9C    |
| 535 | ENSG00000214944 | ARHGEF28 |
| 536 | ENSG00000105821 | DNAJC2   |
| 537 | ENSG00000077684 | JADE1    |
| 538 | ENSG00000112972 | HMGCS1   |
| 539 | ENSG00000164251 | F2RL1    |
| 540 | ENSG00000198680 | TUSC1    |
| 541 | ENSG00000196531 | NACA     |
| 542 | ENSG00000162614 | NEXN     |
| 543 | ENSG00000177084 | POLE     |
| 544 | ENSG00000109255 | NMU      |
| 545 | ENSG00000144381 | HSPD1    |
| 546 | ENSG00000164924 | YWHAZ    |
| 547 | ENSG00000198088 | NUP62CL  |
| 548 | ENSG00000198355 | PIM3     |
| 549 | ENSG00000171552 | BCL2L1   |



|     |                 |          |
|-----|-----------------|----------|
| 550 | ENSG00000186638 | KIF24    |
| 551 | ENSG00000153395 | LPCAT1   |
| 552 | ENSG00000100632 | ERH      |
| 553 | ENSG00000120129 | DUSP1    |
| 554 | ENSG00000204389 | HSPA1A   |
| 555 | ENSG00000173846 | PLK3     |
| 556 | ENSG00000129484 | PARP2    |
| 557 | ENSG00000165886 | UBTD1    |
| 558 | ENSG00000165501 | LRR1     |
| 559 | ENSG00000169021 | UQCRFS1  |
| 560 | ENSG00000172893 | DHCR7    |
| 561 | ENSG00000214826 | DDX12P   |
| 562 | ENSG00000105372 | RPS19    |
| 563 | ENSG00000068028 | RASSF1   |
| 564 | ENSG00000189241 | TSPYL1   |
| 565 | ENSG00000126226 | PCID2    |
| 566 | ENSG00000033030 | ZCCHC8   |
| 567 | ENSG00000109321 | AREG     |
| 568 | ENSG00000134030 | CTIF     |
| 569 | ENSG00000166925 | TSC22D4  |
| 570 | ENSG00000132823 | OSER1    |
| 571 | ENSG00000183255 | PTTG1IP  |
| 572 | ENSG00000206625 | RNU6-1   |
| 573 | ENSG00000065911 | MTHFD2   |
| 574 | ENSG00000118971 | CCND2    |
| 575 | ENSG00000167552 | TUBA1A   |
| 576 | ENSG00000169689 | CENPX    |
| 577 | ENSG00000182752 | PAPPA    |
| 578 | ENSG00000074266 | EED      |
| 579 | ENSG00000127948 | POR      |
| 580 | ENSG00000137936 | BCAR3    |
| 581 | ENSG00000123737 | EXOSC9   |
| 582 | ENSG00000207357 | RNU6-2   |
| 583 | ENSG00000144136 | SLC20A1  |
| 584 | ENSG00000075426 | FOSL2    |
| 585 | ENSG00000166441 | RPL27A   |
| 586 | ENSG00000163507 | CIP2A    |
| 587 | ENSG00000109062 | SLC9A3R1 |
| 588 | ENSG00000123933 | MXD4     |
| 589 | ENSG00000183963 | SMTN     |
| 590 | ENSG00000145425 | RPS3A    |
| 591 | ENSG00000115687 | PASK     |

|     |                 |            |
|-----|-----------------|------------|
| 592 | ENSG00000072864 | NDE1       |
| 593 | ENSG00000177595 | PIDD1      |
| 594 | ENSG00000206899 | RNU6-36P   |
| 595 | ENSG00000165181 | SHOC1      |
| 596 | ENSG00000120053 | GOT1       |
| 597 | ENSG00000140400 | MAN2C1     |
| 598 | ENSG00000101639 | CEP192     |
| 599 | ENSG00000158246 | TENT5B     |
| 600 | ENSG00000077549 | CAPZB      |
| 601 | ENSG00000079482 | OPHN1      |
| 602 | ENSG00000009954 | BAZ1B      |
| 603 | ENSG00000082438 | COBLL1     |
| 604 | ENSG00000105516 | DBP        |
| 605 | ENSG00000174738 | NR1D2      |
| 606 | ENSG00000176225 | RTTN       |
| 607 | ENSG00000173559 | NABP1      |
| 608 | ENSG00000188610 | FAM72B     |
| 609 | ENSG00000131462 | TUBG1      |
| 610 | ENSG00000184047 | DIABLO     |
| 611 | ENSG00000001460 | STPG1      |
| 612 | ENSG00000104635 | SLC39A14   |
| 613 | ENSG00000160789 | LMNA       |
| 614 | ENSG00000121388 | Pseudogene |
| 615 | ENSG00000155506 | LARP1      |
| 616 | ENSG00000137497 | NUMA1      |
| 617 | ENSG00000166965 | RCCD1      |
| 618 | ENSG00000116679 | IVNS1ABP   |
| 619 | ENSG00000057019 | DCBLD2     |
| 620 | ENSG00000177879 | AP3S1      |
| 621 | ENSG00000176105 | YES1       |
| 622 | ENSG00000143878 | RHOB       |
| 623 | ENSG00000117616 | RSRP1      |
| 624 | ENSG00000115306 | SPTBN1     |
| 625 | ENSG00000112576 | CCND3      |
| 626 | ENSG00000104783 | KCNN4      |
| 627 | ENSG00000225630 | MTND2P28   |
| 628 | ENSG00000087077 | TRIP6      |
| 629 | ENSG00000153233 | PTPRR      |
| 630 | ENSG00000173068 | BNC2       |
| 631 | ENSG00000085840 | ORC1       |
| 632 | ENSG00000179094 | PER1       |
| 633 | ENSG00000276180 | H4C9       |

|     |                 |            |
|-----|-----------------|------------|
| 634 | ENSG00000101868 | POLA1      |
| 635 | ENSG00000170160 | CCDC144A   |
| 636 | ENSG00000284946 | Pseudogene |
| 637 | ENSG00000105325 | FZR1       |
| 638 | ENSG00000206965 | RNU6-5P    |
| 639 | ENSG00000104671 | DCTN6      |
| 640 | ENSG00000096384 | HSP90AB1   |
| 641 | ENSG00000116133 | DHCR24     |
| 642 | ENSG00000183814 | LIN9       |
| 643 | ENSG00000146425 | DYNLT1     |
| 644 | ENSG00000197256 | KANK2      |
| 645 | ENSG00000152117 | SMPD4BP    |
| 646 | ENSG00000118680 | MYL12B     |
| 647 | ENSG00000188529 | SRSF10     |
| 648 | ENSG00000182197 | EXT1       |
| 649 | ENSG00000140350 | ANP32A     |
| 650 | ENSG00000130816 | DNMT1      |
| 651 | ENSG00000092140 | G2E3       |
| 652 | ENSG00000112759 | SLC29A1    |
| 653 | ENSG00000124635 | H2BC11     |
| 654 | ENSG00000147155 | EBP        |
| 655 | ENSG00000172244 | C5orf34    |
| 656 | ENSG00000140332 | TLE3       |
| 657 | ENSG00000129355 | CDKN2D     |
| 658 | ENSG00000169252 | ADRB2      |
| 659 | ENSG00000189337 | KAZN       |
| 660 | ENSG00000183763 | TRAIIP     |
| 661 | ENSG00000183955 | KMT5A      |
| 662 | ENSG00000112081 | SRSF3      |
| 663 | ENSG00000104064 | GABPB1     |
| 664 | ENSG00000207507 | RNU6-9     |
| 665 | ENSG00000168916 | ZNF608     |
| 666 | ENSG00000270882 | H4C14      |
| 667 | ENSG00000111276 | CDKN1B     |
| 668 | ENSG00000119771 | KLHL29     |
| 669 | ENSG00000070882 | OSBPL3     |
| 670 | ENSG00000162521 | RBBP4      |
| 671 | ENSG00000137818 | RPLP1      |
| 672 | ENSG00000165732 | DDX21      |
| 673 | ENSG00000283269 | Pseudogene |
| 674 | ENSG00000161011 | SQSTM1     |
| 675 | ENSG00000142541 | RPL13A     |

|     |                 |          |
|-----|-----------------|----------|
| 676 | ENSG00000186283 | TOR3A    |
| 677 | ENSG00000206932 | RNU6-4P  |
| 678 | ENSG00000100479 | POLE2    |
| 679 | ENSG00000146834 | MEPCE    |
| 680 | ENSG00000207041 | RNU6-3P  |
| 681 | ENSG00000162062 | TEDC2    |
| 682 | ENSG00000142871 | CCN1     |
| 683 | ENSG00000167565 | SERTAD3  |
| 684 | ENSG00000171940 | ZNF217   |
| 685 | ENSG00000162929 | SANBR    |
| 686 | ENSG00000148248 | SURF4    |
| 687 | ENSG00000100401 | RANGAP1  |
| 688 | ENSG00000136436 | CALCOCO2 |
| 689 | ENSG00000147813 | NAPRT    |
| 690 | ENSG00000189060 | H1-0     |
| 691 | ENSG00000277161 | PIGW     |
| 692 | ENSG00000187837 | H1-2     |
| 693 | ENSG00000149483 | TMEM138  |
| 694 | ENSG00000004897 | CDC27    |
| 695 | ENSG00000152359 | POC5     |
| 696 | ENSG00000157191 | NECAP2   |
| 697 | ENSG00000204370 | SDHD     |
| 698 | ENSG00000163655 | GMPS     |
| 699 | ENSG00000160753 | RUSC1    |
| 700 | ENSG00000142149 | HUNK     |
| 701 | ENSG00000130695 | CEP85    |
| 702 | ENSG00000170852 | KBTBD2   |
| 703 | ENSG00000132485 | ZRANB2   |
| 704 | ENSG00000135211 | TMEM60   |
| 705 | ENSG00000108055 | SMC3     |
| 706 | ENSG00000100519 | PSMC6    |
| 707 | ENSG00000116667 | C1orf21  |
| 708 | ENSG00000115159 | GPD2     |
| 709 | ENSG00000167670 | CHAF1A   |
| 710 | ENSG00000087086 | FTL      |
| 711 | ENSG00000127586 | CHTF18   |
| 712 | ENSG00000101574 | METTL4   |
| 713 | ENSG00000176974 | SHMT1    |
| 714 | ENSG00000121741 | ZMYM2    |
| 715 | ENSG00000166949 | SMAD3    |
| 716 | ENSG00000105856 | HBP1     |
| 717 | ENSG00000145526 | CDH18    |

|     |                 |           |
|-----|-----------------|-----------|
| 718 | ENSG00000164087 | POC1A     |
| 719 | ENSG00000095002 | MSH2      |
| 720 | ENSG00000130921 | MTRFR     |
| 721 | ENSG00000204580 | DDR1      |
| 722 | ENSG00000068489 | PRR11     |
| 723 | ENSG00000185567 | AHNAK2    |
| 724 | ENSG00000006625 | GGCT      |
| 725 | ENSG00000162433 | AK4       |
| 726 | ENSG00000061337 | LZTS1     |
| 727 | ENSG00000070761 | CFAP20    |
| 728 | ENSG00000163002 | NUP35     |
| 729 | ENSG00000175592 | FOSL1     |
| 730 | ENSG00000187231 | SESTD1    |
| 731 | ENSG00000113456 | RAD1      |
| 732 | ENSG00000131737 | KRT34     |
| 733 | ENSG00000136699 | SMPD4     |
| 734 | ENSG00000161692 | DBF4B     |
| 735 | ENSG00000092969 | TGFB2     |
| 736 | ENSG00000114861 | FOXP1     |
| 737 | ENSG00000186472 | PCLO      |
| 738 | ENSG00000118181 | RPS25     |
| 739 | ENSG00000113569 | NUP155    |
| 740 | ENSG00000205560 | CPT1B     |
| 741 | ENSG00000143942 | CHAC2     |
| 742 | ENSG00000176014 | TUBB6     |
| 743 | ENSG00000158201 | ABHD3     |
| 744 | ENSG00000103540 | CCP110    |
| 745 | ENSG00000112414 | ADGRG6    |
| 746 | ENSG00000110108 | TMEM109   |
| 747 | ENSG00000122566 | HNRNPA2B1 |
| 748 | ENSG00000096433 | ITPR3     |
| 749 | ENSG00000138496 | PARP9     |
| 750 | ENSG00000166140 | ZFYVE19   |
| 751 | ENSG00000119397 | CNTRL     |
| 752 | ENSG00000177917 | ARL6IP6   |
| 753 | ENSG00000148019 | CEP78     |
| 754 | ENSG00000104047 | DTWD1     |
| 755 | ENSG00000161980 | POLR3K    |
| 756 | ENSG00000182378 | PLCXD1    |
| 757 | ENSG00000128245 | YWHAH     |
| 758 | ENSG00000143367 | TUFT1     |
| 759 | ENSG00000143815 | LBR       |

|     |                 |         |
|-----|-----------------|---------|
| 760 | ENSG00000171105 | INSR    |
| 761 | ENSG00000074696 | HACD3   |
| 762 | ENSG00000101138 | CSTF1   |
| 763 | ENSG00000204388 | HSPA1B  |
| 764 | ENSG00000172167 | MTBP    |
| 765 | ENSG00000164985 | PSIP1   |
| 766 | ENSG00000213186 | TRIM59  |
| 767 | ENSG00000134802 | SLC43A3 |
| 768 | ENSG00000181544 | FANCB   |
| 769 | ENSG00000164649 | CDCA7L  |
| 770 | ENSG00000099810 | MTAP    |
| 771 | ENSG00000100162 | CENPM   |
| 772 | ENSG00000103121 | CMC2    |
| 773 | ENSG00000127337 | YEATS4  |
| 774 | ENSG00000165494 | PCF11   |
| 775 | ENSG00000131351 | HAUS8   |
| 776 | ENSG00000105270 | CLIP3   |
| 777 | ENSG00000178295 | GEN1    |
| 778 | ENSG00000151692 | RNF144A |
| 779 | ENSG00000081019 | RSBN1   |
| 780 | ENSG00000188312 | CENPP   |
| 781 | ENSG00000105991 | HOXA1   |
| 782 | ENSG00000068885 | IFT80   |
| 783 | ENSG00000128708 | HAT1    |
| 784 | ENSG00000178105 | DDX10   |
| 785 | ENSG00000184156 | KCNQ3   |
| 786 | ENSG00000151276 | MAGI1   |
| 787 | ENSG00000217555 | CKLF    |
| 788 | ENSG00000109861 | CTSC    |

(3) Feature list yielded by SHAP by lightGBM

| Rank | Ensembl ID      | Gene symbol |
|------|-----------------|-------------|
| 1    | ENSG00000170312 | CDK1        |
| 2    | ENSG00000197061 | H4C3        |
| 3    | ENSG00000131652 | THOC6       |
| 4    | ENSG00000140451 | PIF1        |
| 5    | ENSG00000175063 | UBE2C       |
| 6    | ENSG00000229089 | ANKRD20A8P  |
| 7    | ENSG00000150991 | UBC         |
| 8    | ENSG00000189057 | FAM111B     |
| 9    | ENSG00000105173 | CCNE1       |
| 10   | ENSG00000132646 | PCNA        |

|    |                 |           |
|----|-----------------|-----------|
| 11 | ENSG00000101447 | FAM83D    |
| 12 | ENSG00000182481 | KPNA2     |
| 13 | ENSG00000012048 | BRCA1     |
| 14 | ENSG00000259848 | LOC442028 |
| 15 | ENSG00000274997 | H2AC12    |
| 16 | ENSG00000075426 | FOSL2     |
| 17 | ENSG00000118680 | MYL12B    |
| 18 | ENSG00000014138 | POLA2     |
| 19 | ENSG00000112029 | FBXO5     |
| 20 | ENSG00000131747 | TOP2A     |
| 21 | ENSG00000116830 | TTF2      |
| 22 | ENSG00000117399 | CDC20     |
| 23 | ENSG00000170425 | ADORA2B   |
| 24 | ENSG00000140319 | SRP14     |
| 25 | ENSG00000134057 | CCNB1     |
| 26 | ENSG00000119801 | YPEL5     |
| 27 | ENSG00000223564 | CYP4F32P  |
| 28 | ENSG00000173207 | CKS1B     |
| 29 | ENSG00000100297 | MCM5      |
| 30 | ENSG00000276368 | H2AC14    |
| 31 | ENSG00000167601 | AXL       |
| 32 | ENSG00000155506 | LARP1     |
| 33 | ENSG00000189241 | TSPYL1    |
| 34 | ENSG00000117450 | PRDX1     |
| 35 | ENSG00000080986 | NDC80     |
| 36 | ENSG00000175305 | CCNE2     |
| 37 | ENSG00000115641 | FHL2      |
| 38 | ENSG00000177426 | TGIF1     |
| 39 | ENSG00000169021 | UQCRFS1   |
| 40 | ENSG00000127948 | POR       |
| 41 | ENSG00000186472 | PCLO      |
| 42 | ENSG00000171552 | BCL2L1    |
| 43 | ENSG00000104267 | CA2       |
| 44 | ENSG00000143933 | CALM2     |
| 45 | ENSG00000277161 | PIGW      |
| 46 | ENSG00000171848 | RRM2      |
| 47 | ENSG00000145425 | RPS3A     |
| 48 | ENSG00000087586 | AURKA     |
| 49 | ENSG00000167978 | SRRM2     |
| 50 | ENSG00000131351 | HAUS8     |
| 51 | ENSG00000115946 | PNO1      |
| 52 | ENSG00000105355 | PLIN3     |

|    |                 |          |
|----|-----------------|----------|
| 53 | ENSG00000167552 | TUBA1A   |
| 54 | ENSG00000126368 | NR1D1    |
| 55 | ENSG00000122952 | ZWINT    |
| 56 | ENSG00000105011 | ASF1B    |
| 57 | ENSG00000054654 | SYNE2    |
| 58 | ENSG00000170540 | ARL6IP1  |
| 59 | ENSG00000164924 | YWHAZ    |
| 60 | ENSG00000144354 | CDCA7    |
| 61 | ENSG00000140264 | SERF2    |
| 62 | ENSG00000117724 | CENPF    |
| 63 | ENSG00000197956 | S100A6   |
| 64 | ENSG00000158246 | TENT5B   |
| 65 | ENSG00000129474 | AJUBA    |
| 66 | ENSG00000101003 | GIN51    |
| 67 | ENSG00000146670 | CDCA5    |
| 68 | ENSG00000145386 | CCNA2    |
| 69 | ENSG00000007968 | E2F2     |
| 70 | ENSG00000188229 | TUBB4B   |
| 71 | ENSG00000171421 | MRPL36   |
| 72 | ENSG00000087077 | TRIP6    |
| 73 | ENSG00000076248 | UNG      |
| 74 | ENSG00000167513 | CDT1     |
| 75 | ENSG00000114346 | ECT2     |
| 76 | ENSG00000092853 | CLSPN    |
| 77 | ENSG00000178913 | TAF7     |
| 78 | ENSG00000160957 | RECQL4   |
| 79 | ENSG00000078401 | EDN1     |
| 80 | ENSG00000187051 | RPS19BP1 |
| 81 | ENSG00000176890 | TYMS     |
| 82 | ENSG00000168476 | REEP4    |
| 83 | ENSG00000161980 | POLR3K   |
| 84 | ENSG00000149548 | CCDC15   |
| 85 | ENSG00000146263 | MMS22L   |
| 86 | ENSG00000128340 | RAC2     |
| 87 | ENSG00000127564 | PKMYT1   |
| 88 | ENSG00000087086 | FTL      |
| 89 | ENSG00000205352 | PRR13    |
| 90 | ENSG00000186767 | SPIN4    |
| 91 | ENSG00000183726 | TMEM50A  |
| 92 | ENSG00000174738 | NR1D2    |
| 93 | ENSG00000169683 | LRRC45   |
| 94 | ENSG00000130429 | ARPC1B   |



|     |                 |           |
|-----|-----------------|-----------|
| 95  | ENSG00000124610 | H1-1      |
| 96  | ENSG00000124172 | ATP5F1E   |
| 97  | ENSG00000196866 | H2AC7     |
| 98  | ENSG00000185361 | TNFAIP8L1 |
| 99  | ENSG00000175265 | GOLGA8A   |
| 100 | ENSG00000166002 | SMCO4     |
| 101 | ENSG00000163918 | RFC4      |
| 102 | ENSG00000138385 | SSB       |
| 103 | ENSG00000123485 | HJURP     |
| 104 | ENSG00000024526 | DEPDC1    |
| 105 | ENSG00000013573 | DDX11     |
| 106 | ENSG00000011426 | ANLN      |
| 107 | ENSG00000177943 | MAMDC4    |
| 108 | ENSG00000173456 | RNF26     |
| 109 | ENSG00000152117 | SMPD4BP   |
| 110 | ENSG00000108518 | PFN1      |
| 111 | ENSG00000092969 | TGFB2     |
| 112 | ENSG00000051180 | RAD51     |
| 113 | ENSG00000232388 | SMIM26    |
| 114 | ENSG00000178719 | GRINA     |
| 115 | ENSG00000166965 | RCCD1     |
| 116 | ENSG00000136997 | MYC       |
| 117 | ENSG00000136982 | DSCC1     |
| 118 | ENSG00000129534 | MIS18BP1  |
| 119 | ENSG00000120129 | DUSP1     |
| 120 | ENSG00000109062 | SLC9A3R1  |
| 121 | ENSG00000221829 | FANCG     |
| 122 | ENSG00000214826 | DDX12P    |
| 123 | ENSG00000204370 | SDHD      |
| 124 | ENSG00000196531 | NACA      |
| 125 | ENSG00000184992 | BRI3BP    |
| 126 | ENSG00000184349 | EFNA5     |
| 127 | ENSG00000175573 | C11orf68  |
| 128 | ENSG00000175455 | CCDC14    |
| 129 | ENSG00000165480 | SKA3      |
| 130 | ENSG00000116717 | GADD45A   |
| 131 | ENSG00000116133 | DHCR24    |
| 132 | ENSG00000112972 | HMGCS1    |
| 133 | ENSG00000104783 | KCNN4     |
| 134 | ENSG00000091651 | ORC6      |
| 135 | ENSG00000076003 | MCM6      |
| 136 | ENSG00000263513 | FAM72C    |

|     |                 |          |
|-----|-----------------|----------|
| 137 | ENSG00000198033 | TUBA3C   |
| 138 | ENSG00000186283 | TOR3A    |
| 139 | ENSG00000179958 | DCTPP1   |
| 140 | ENSG00000172893 | DHCR7    |
| 141 | ENSG00000166801 | FAM111A  |
| 142 | ENSG00000166140 | ZFYVE19  |
| 143 | ENSG00000156802 | ATAD2    |
| 144 | ENSG00000148773 | MKI67    |
| 145 | ENSG00000143815 | LBR      |
| 146 | ENSG00000137807 | KIF23    |
| 147 | ENSG00000131470 | PSMC3IP  |
| 148 | ENSG00000124766 | SOX4     |
| 149 | ENSG00000122641 | INHBA    |
| 150 | ENSG00000103995 | CEP152   |
| 151 | ENSG00000095002 | MSH2     |
| 152 | ENSG00000231007 | CDC20P1  |
| 153 | ENSG00000213024 | NUP62    |
| 154 | ENSG00000205560 | CPT1B    |
| 155 | ENSG00000198258 | UBL5     |
| 156 | ENSG00000185567 | AHNAK2   |
| 157 | ENSG00000183963 | SMTN     |
| 158 | ENSG00000175216 | CKAP5    |
| 159 | ENSG00000168298 | H1-4     |
| 160 | ENSG00000168282 | MGAT2    |
| 161 | ENSG00000166949 | SMAD3    |
| 162 | ENSG00000166851 | PLK1     |
| 163 | ENSG00000166803 | PCLAF    |
| 164 | ENSG00000135185 | TMEM243  |
| 165 | ENSG00000134690 | CDCA8    |
| 166 | ENSG00000104635 | SLC39A14 |
| 167 | ENSG00000100526 | CDKN3    |
| 168 | ENSG00000001460 | STPG1    |
| 169 | ENSG00000183814 | LIN9     |
| 170 | ENSG00000182541 | LIMK2    |
| 171 | ENSG00000180573 | H2AC6    |
| 172 | ENSG00000176105 | YES1     |
| 173 | ENSG00000168496 | FEN1     |
| 174 | ENSG00000166483 | WEE1     |
| 175 | ENSG00000153048 | CARHSP1  |
| 176 | ENSG00000145779 | TNFAIP8  |
| 177 | ENSG00000132823 | OSER1    |
| 178 | ENSG00000128965 | CHAC1    |

|     |                 |            |
|-----|-----------------|------------|
| 179 | ENSG00000121716 | PILRB      |
| 180 | ENSG00000117143 | UAP1       |
| 181 | ENSG00000115541 | HSPE1      |
| 182 | ENSG00000096093 | EFHC1      |
| 183 | ENSG00000065328 | MCM10      |
| 184 | ENSG00000282988 | Pseudogene |
| 185 | ENSG00000232502 | Pseudogene |
| 186 | ENSG00000214944 | ARHGEF28   |
| 187 | ENSG00000214776 | Pseudogene |
| 188 | ENSG00000184047 | DIABLO     |
| 189 | ENSG00000176222 | ZNF404     |
| 190 | ENSG00000169813 | HNRNPF     |
| 191 | ENSG00000169689 | CENPX      |
| 192 | ENSG00000169188 | APEX2      |
| 193 | ENSG00000163655 | GMPS       |
| 194 | ENSG00000149798 | CDC42EP2   |
| 195 | ENSG00000136436 | CALCOCO2   |
| 196 | ENSG00000135046 | ANXA1      |
| 197 | ENSG00000128016 | ZFP36      |
| 198 | ENSG00000123416 | TUBA1B     |
| 199 | ENSG00000120053 | GOT1       |
| 200 | ENSG00000109861 | CTSC       |
| 201 | ENSG00000109099 | PMP22      |
| 202 | ENSG00000106367 | AP1S1      |
| 203 | ENSG00000101608 | MYL12A     |
| 204 | ENSG00000100629 | CEP128     |
| 205 | ENSG00000100401 | RANGAP1    |
| 206 | ENSG00000085999 | RAD54L     |
| 207 | ENSG00000196235 | SUPT5H     |
| 208 | ENSG00000187266 | EPOR       |
| 209 | ENSG00000186871 | ERCC6L     |
| 210 | ENSG00000171490 | RSL1D1     |
| 211 | ENSG00000162419 | GMEB1      |
| 212 | ENSG00000162073 | PAQR4      |
| 213 | ENSG00000157456 | CCNB2      |
| 214 | ENSG00000152253 | SPC25      |
| 215 | ENSG00000149636 | DSN1       |
| 216 | ENSG00000146592 | CREB5      |
| 217 | ENSG00000143878 | RHOB       |
| 218 | ENSG00000126226 | PCID2      |
| 219 | ENSG00000125898 | FAM110A    |
| 220 | ENSG00000123975 | CKS2       |

|     |                 |              |
|-----|-----------------|--------------|
| 221 | ENSG00000123146 | ADGRE5       |
| 222 | ENSG00000121388 | Pseudogene   |
| 223 | ENSG00000117616 | RSRP1        |
| 224 | ENSG00000115306 | SPTBN1       |
| 225 | ENSG00000112312 | GMNN         |
| 226 | ENSG00000110108 | TMEM109      |
| 227 | ENSG00000106462 | EZH2         |
| 228 | ENSG00000101773 | RBBP8        |
| 229 | ENSG00000100941 | PNN          |
| 230 | ENSG00000100100 | PIK3IP1      |
| 231 | ENSG00000093009 | CDC45        |
| 232 | ENSG00000075131 | TIPIN        |
| 233 | ENSG00000049192 | ADAMTS6      |
| 234 | ENSG00000034510 | TMSB10       |
| 235 | ENSG00000025770 | NCAPH2       |
| 236 | ENSG00000010292 | NCAPD2       |
| 237 | ENSG00000006327 | TNFRSF12A    |
| 238 | ENSG00000273709 | LOC124904136 |
| 239 | ENSG00000213186 | TRIM59       |
| 240 | ENSG00000204389 | HSPA1A       |
| 241 | ENSG00000198331 | HYLS1        |
| 242 | ENSG00000197256 | KANK2        |
| 243 | ENSG00000196787 | H2AC11       |
| 244 | ENSG00000186834 | HEXIM1       |
| 245 | ENSG00000181467 | RAP2B        |
| 246 | ENSG00000178607 | ERN1         |
| 247 | ENSG00000171105 | INSR         |
| 248 | ENSG00000167900 | TK1          |
| 249 | ENSG00000167670 | CHAF1A       |
| 250 | ENSG00000164251 | F2RL1        |
| 251 | ENSG00000152359 | POC5         |
| 252 | ENSG00000143476 | DTL          |
| 253 | ENSG00000142945 | KIF2C        |
| 254 | ENSG00000141232 | TOB1         |
| 255 | ENSG00000137310 | TCF19        |
| 256 | ENSG00000135451 | TROAP        |
| 257 | ENSG00000135334 | AKIRIN2      |
| 258 | ENSG00000131737 | KRT34        |
| 259 | ENSG00000128944 | KNSTRN       |
| 260 | ENSG00000124635 | H2BC11       |
| 261 | ENSG00000124422 | USP22        |
| 262 | ENSG00000124207 | CSE1L        |

|     |                 |          |
|-----|-----------------|----------|
| 263 | ENSG00000122565 | CBX3     |
| 264 | ENSG00000121211 | MND1     |
| 265 | ENSG00000119969 | HELLS    |
| 266 | ENSG00000117713 | ARID1A   |
| 267 | ENSG00000117139 | KDM5B    |
| 268 | ENSG00000114861 | FOXP1    |
| 269 | ENSG00000112742 | TTK      |
| 270 | ENSG00000112081 | SRSF3    |
| 271 | ENSG00000104738 | MCM4     |
| 272 | ENSG00000077514 | POLD3    |
| 273 | ENSG00000073111 | MCM2     |
| 274 | ENSG00000049541 | RFC2     |
| 275 | ENSG00000276043 | UHRF1    |
| 276 | ENSG00000206625 | RNU6-1   |
| 277 | ENSG00000196230 | TUBB     |
| 278 | ENSG00000188549 | CCDC9B   |
| 279 | ENSG00000183955 | KMT5A    |
| 280 | ENSG00000183150 | GPR19    |
| 281 | ENSG00000176148 | TCP11L1  |
| 282 | ENSG00000171223 | JUNB     |
| 283 | ENSG00000170779 | CDCA4    |
| 284 | ENSG00000170160 | CCDC144A |
| 285 | ENSG00000169242 | EFNA1    |
| 286 | ENSG00000167565 | SERTAD3  |
| 287 | ENSG00000165501 | LRR1     |
| 288 | ENSG00000165304 | MELK     |
| 289 | ENSG00000165244 | ZNF367   |
| 290 | ENSG00000164611 | PTTG1    |
| 291 | ENSG00000162062 | TEDC2    |
| 292 | ENSG00000160789 | LMNA     |
| 293 | ENSG00000159335 | PTMS     |
| 294 | ENSG00000156970 | BUB1B    |
| 295 | ENSG00000152518 | ZFP36L2  |
| 296 | ENSG00000148248 | SURF4    |
| 297 | ENSG00000144554 | FANCD2   |
| 298 | ENSG00000144136 | SLC20A1  |
| 299 | ENSG00000143217 | NECTIN4  |
| 300 | ENSG00000139618 | BRCA2    |
| 301 | ENSG00000134375 | TIMM17A  |
| 302 | ENSG00000131475 | VPS25    |
| 303 | ENSG00000130816 | DNMT1    |
| 304 | ENSG00000129173 | E2F8     |

|     |                 |          |
|-----|-----------------|----------|
| 305 | ENSG00000126945 | HNRNPH2  |
| 306 | ENSG00000120539 | MASTL    |
| 307 | ENSG00000116679 | IVNS1ABP |
| 308 | ENSG00000116667 | C1orf21  |
| 309 | ENSG00000115687 | PASK     |
| 310 | ENSG00000113456 | RAD1     |
| 311 | ENSG00000113369 | ARRDC3   |
| 312 | ENSG00000112118 | MCM3     |
| 313 | ENSG00000109971 | HSPA8    |
| 314 | ENSG00000109255 | NMU      |
| 315 | ENSG00000105516 | DBP      |
| 316 | ENSG00000104064 | GABPB1   |
| 317 | ENSG00000101224 | CDC25B   |
| 318 | ENSG00000099194 | SCD      |
| 319 | ENSG00000088986 | DYNLL1   |
| 320 | ENSG00000085840 | ORC1     |
| 321 | ENSG00000070761 | CFAP20   |
| 322 | ENSG00000013588 | GPRC5A   |
| 323 | ENSG00000228716 | DHFR     |
| 324 | ENSG00000198763 | ND2      |
| 325 | ENSG00000198680 | TUSC1    |
| 326 | ENSG00000198056 | PRIM1    |
| 327 | ENSG00000188985 | DHFRP1   |
| 328 | ENSG00000187741 | FANCA    |
| 329 | ENSG00000186185 | KIF18B   |
| 330 | ENSG00000183255 | PTTG1IP  |
| 331 | ENSG00000182752 | PAPPA    |
| 332 | ENSG00000180304 | OAZ2     |
| 333 | ENSG00000175130 | MARCKSL1 |
| 334 | ENSG00000172244 | C5orf34  |
| 335 | ENSG00000171867 | PRNP     |
| 336 | ENSG00000170545 | SMAGP    |
| 337 | ENSG00000164754 | RAD21    |
| 338 | ENSG00000162614 | NEXN     |
| 339 | ENSG00000162607 | USP1     |
| 340 | ENSG00000162433 | AK4      |
| 341 | ENSG00000158201 | ABHD3    |
| 342 | ENSG00000149257 | SERPINH1 |
| 343 | ENSG00000147155 | EBP      |
| 344 | ENSG00000146425 | DYNLT1   |
| 345 | ENSG00000144381 | HSPD1    |
| 346 | ENSG00000142765 | SYTL1    |

|     |                 |           |
|-----|-----------------|-----------|
| 347 | ENSG00000142541 | RPL13A    |
| 348 | ENSG00000139211 | AMIGO2    |
| 349 | ENSG00000138496 | PARP9     |
| 350 | ENSG00000137936 | BCAR3     |
| 351 | ENSG00000137727 | ARHGAP20  |
| 352 | ENSG00000135211 | TMEM60    |
| 353 | ENSG00000131153 | GINS2     |
| 354 | ENSG00000129195 | PIMREG    |
| 355 | ENSG00000128951 | DUT       |
| 356 | ENSG00000118971 | CCND2     |
| 357 | ENSG00000116062 | MSH6      |
| 358 | ENSG00000113810 | SMC4      |
| 359 | ENSG00000111665 | CDCA3     |
| 360 | ENSG00000111276 | CDKN1B    |
| 361 | ENSG00000111247 | RAD51AP1  |
| 362 | ENSG00000109674 | NEIL3     |
| 363 | ENSG00000109321 | AREG      |
| 364 | ENSG00000104047 | DTWD1     |
| 365 | ENSG00000102804 | TSC22D1   |
| 366 | ENSG00000079482 | OPHN1     |
| 367 | ENSG00000075391 | RASAL2    |
| 368 | ENSG00000265790 | RNASEH1P1 |
| 369 | ENSG00000256618 | MTRNR2L1  |
| 370 | ENSG00000249859 | PVT1      |
| 371 | ENSG00000197299 | BLM       |
| 372 | ENSG00000185787 | MORF4L1   |
| 373 | ENSG00000185324 | CDK10     |
| 374 | ENSG00000184678 | H2BC21    |
| 375 | ENSG00000182197 | EXT1      |
| 376 | ENSG00000181722 | ZBTB20    |
| 377 | ENSG00000178074 | C2orf69   |
| 378 | ENSG00000177595 | PIDD1     |
| 379 | ENSG00000173846 | PLK3      |
| 380 | ENSG00000171320 | ESCO2     |
| 381 | ENSG00000170759 | KIF5B     |
| 382 | ENSG00000165181 | SHOC1     |
| 383 | ENSG00000164796 | CSMD3     |
| 384 | ENSG00000163002 | NUP35     |
| 385 | ENSG00000162222 | TTC9C     |
| 386 | ENSG00000160949 | TONSL     |
| 387 | ENSG00000157191 | NECAP2    |
| 388 | ENSG00000148019 | CEP78     |

|     |                 |          |
|-----|-----------------|----------|
| 389 | ENSG00000147813 | NAPRT    |
| 390 | ENSG00000146410 | MTFR2    |
| 391 | ENSG00000140534 | TICRR    |
| 392 | ENSG00000140400 | MAN2C1   |
| 393 | ENSG00000138180 | CEP55    |
| 394 | ENSG00000138175 | ARL3     |
| 395 | ENSG00000138092 | CENPO    |
| 396 | ENSG00000134802 | SLC43A3  |
| 397 | ENSG00000134030 | CTIF     |
| 398 | ENSG00000132475 | H3-3B    |
| 399 | ENSG00000131435 | PDLIM4   |
| 400 | ENSG00000130921 | MTRFR    |
| 401 | ENSG00000130844 | ZNF331   |
| 402 | ENSG00000130695 | CEP85    |
| 403 | ENSG00000130669 | PAK4     |
| 404 | ENSG00000130202 | NECTIN2  |
| 405 | ENSG00000128708 | HAT1     |
| 406 | ENSG00000128294 | TPST2    |
| 407 | ENSG00000119669 | IRF2BPL  |
| 408 | ENSG00000119397 | CNTRL    |
| 409 | ENSG00000118523 | CCN2     |
| 410 | ENSG00000111859 | NEDD9    |
| 411 | ENSG00000107816 | LZTS2    |
| 412 | ENSG00000102977 | ACD      |
| 413 | ENSG00000101057 | MYBL2    |
| 414 | ENSG00000100632 | ERH      |
| 415 | ENSG00000095383 | TBC1D2   |
| 416 | ENSG00000092470 | WDR76    |
| 417 | ENSG00000089685 | BIRC5    |
| 418 | ENSG00000081320 | STK17B   |
| 419 | ENSG00000077152 | UBE2T    |
| 420 | ENSG00000074696 | HACD3    |
| 421 | ENSG00000026103 | FAS      |
| 422 | ENSG00000277778 | PGM5P2   |
| 423 | ENSG00000225630 | MTND2P28 |
| 424 | ENSG00000215252 | GOLGA8B  |
| 425 | ENSG00000214756 | CSKMT    |
| 426 | ENSG00000213347 | MXD3     |
| 427 | ENSG00000204382 | XAGE1B   |
| 428 | ENSG00000198901 | PRC1     |
| 429 | ENSG00000198890 | PRMT6    |
| 430 | ENSG00000188486 | H2AX     |



|     |                 |         |
|-----|-----------------|---------|
| 431 | ENSG00000185803 | SLC52A2 |
| 432 | ENSG00000184661 | CDCA2   |
| 433 | ENSG00000184445 | KNTC1   |
| 434 | ENSG00000183763 | TRAIP   |
| 435 | ENSG00000183337 | BCOR    |
| 436 | ENSG00000179094 | PER1    |
| 437 | ENSG00000177602 | HASPIN  |
| 438 | ENSG00000177084 | POLE    |
| 439 | ENSG00000174136 | RGMB    |
| 440 | ENSG00000172432 | GTPBP2  |
| 441 | ENSG00000170889 | RPS9    |
| 442 | ENSG00000170264 | FAM161A |
| 443 | ENSG00000169607 | CKAP2L  |
| 444 | ENSG00000168140 | VASN    |
| 445 | ENSG00000167553 | TUBA1C  |
| 446 | ENSG00000167325 | RRM1    |
| 447 | ENSG00000166508 | MCM7    |
| 448 | ENSG00000164649 | CDCA7L  |
| 449 | ENSG00000162063 | CCNF    |
| 450 | ENSG00000160113 | NR2F6   |
| 451 | ENSG00000151503 | NCAPD3  |
| 452 | ENSG00000148677 | ANKRD1  |
| 453 | ENSG00000146555 | SDK1    |
| 454 | ENSG00000145241 | CENPC   |
| 455 | ENSG00000144227 | NXPH2   |
| 456 | ENSG00000143631 | FLG     |
| 457 | ENSG00000143621 | ILF2    |
| 458 | ENSG00000143367 | TUFT1   |
| 459 | ENSG00000142871 | CCN1    |
| 460 | ENSG00000140350 | ANP32A  |
| 461 | ENSG00000138778 | CENPE   |
| 462 | ENSG00000137804 | NUSAP1  |
| 463 | ENSG00000136699 | SMPD4   |
| 464 | ENSG00000136122 | BORA    |
| 465 | ENSG00000132341 | RAN     |
| 466 | ENSG00000128245 | YWHAH   |
| 467 | ENSG00000127922 | SEM1    |
| 468 | ENSG00000127483 | HP1BP3  |
| 469 | ENSG00000125885 | MCM8    |
| 470 | ENSG00000123473 | STIL    |
| 471 | ENSG00000123219 | CENPK   |
| 472 | ENSG00000122483 | CCDC18  |

|     |                 |          |
|-----|-----------------|----------|
| 473 | ENSG00000121152 | NCAPH    |
| 474 | ENSG00000120802 | TMPO     |
| 475 | ENSG00000120334 | CENPL    |
| 476 | ENSG00000117650 | NEK2     |
| 477 | ENSG00000115875 | SRSF7    |
| 478 | ENSG00000115392 | FANCL    |
| 479 | ENSG00000111445 | RFC5     |
| 480 | ENSG00000111321 | LTBR     |
| 481 | ENSG00000108106 | UBE2S    |
| 482 | ENSG00000108055 | SMC3     |
| 483 | ENSG00000106305 | AIMP2    |
| 484 | ENSG00000102384 | CENPI    |
| 485 | ENSG00000100162 | CENPM    |
| 486 | ENSG00000096433 | ITPR3    |
| 487 | ENSG00000091436 | MAP3K20  |
| 488 | ENSG00000091164 | TXNL1    |
| 489 | ENSG00000090889 | KIF4A    |
| 490 | ENSG00000084733 | RAB10    |
| 491 | ENSG00000082438 | COBLL1   |
| 492 | ENSG00000079616 | KIF22    |
| 493 | ENSG00000072571 | HMMR     |
| 494 | ENSG00000056097 | ZFR      |
| 495 | ENSG00000009954 | BAZ1B    |
| 496 | ENSG00000276180 | H4C9     |
| 497 | ENSG00000270882 | H4C14    |
| 498 | ENSG00000250067 | YJEFN3   |
| 499 | ENSG00000217555 | CKLF     |
| 500 | ENSG00000213853 | EMP2     |
| 501 | ENSG00000204899 | MZT1     |
| 502 | ENSG00000204388 | HSPA1B   |
| 503 | ENSG00000185650 | ZFP36L1  |
| 504 | ENSG00000182378 | PLCXD1   |
| 505 | ENSG00000182010 | RTKN2    |
| 506 | ENSG00000176974 | SHMT1    |
| 507 | ENSG00000176014 | TUBB6    |
| 508 | ENSG00000173068 | BNC2     |
| 509 | ENSG00000172167 | MTBP     |
| 510 | ENSG00000171241 | SHCBP1   |
| 511 | ENSG00000169679 | BUB1     |
| 512 | ENSG00000169252 | ADRB2    |
| 513 | ENSG00000167747 | C19orf48 |
| 514 | ENSG00000165732 | DDX21    |

|     |                 |            |
|-----|-----------------|------------|
| 515 | ENSG00000164104 | HMGB2      |
| 516 | ENSG00000163950 | SLBP       |
| 517 | ENSG00000162772 | ATF3       |
| 518 | ENSG00000162231 | NXF1       |
| 519 | ENSG00000160753 | RUSC1      |
| 520 | ENSG00000154839 | SKA1       |
| 521 | ENSG00000153395 | LPCAT1     |
| 522 | ENSG00000153233 | PTPRR      |
| 523 | ENSG00000149483 | TMEM138    |
| 524 | ENSG00000145604 | SKP2       |
| 525 | ENSG00000145495 | MARCHF6    |
| 526 | ENSG00000143761 | ARF1       |
| 527 | ENSG00000142102 | PGGHG      |
| 528 | ENSG00000139734 | DIAPH3     |
| 529 | ENSG00000139697 | SBNO1      |
| 530 | ENSG00000138346 | DNA2       |
| 531 | ENSG00000137818 | RPLP1      |
| 532 | ENSG00000137497 | NUMA1      |
| 533 | ENSG00000135476 | ESPL1      |
| 534 | ENSG00000131446 | MGAT1      |
| 535 | ENSG00000129484 | PARP2      |
| 536 | ENSG00000129355 | CDKN2D     |
| 537 | ENSG00000126787 | DLGAP5     |
| 538 | ENSG00000117318 | ID3        |
| 539 | ENSG00000115738 | ID2        |
| 540 | ENSG00000114315 | HES1       |
| 541 | ENSG00000112984 | KIF20A     |
| 542 | ENSG00000112576 | CCND3      |
| 543 | ENSG00000112414 | ADGRG6     |
| 544 | ENSG00000111788 | Pseudogene |
| 545 | ENSG00000105372 | RPS19      |
| 546 | ENSG00000103121 | CMC2       |
| 547 | ENSG00000102362 | SYTL4      |
| 548 | ENSG00000101639 | CEP192     |
| 549 | ENSG00000101412 | E2F1       |
| 550 | ENSG00000100479 | POLE2      |
| 551 | ENSG00000100097 | LGALS1     |
| 552 | ENSG00000096384 | HSP90AB1   |
| 553 | ENSG00000094804 | CDC6       |
| 554 | ENSG00000077684 | JADE1      |
| 555 | ENSG00000075218 | GTSE1      |
| 556 | ENSG00000068489 | PRR11      |

|     |                 |           |
|-----|-----------------|-----------|
| 557 | ENSG00000065911 | MTHFD2    |
| 558 | ENSG00000065548 | ZC3H15    |
| 559 | ENSG00000057019 | DCBLD2    |
| 560 | ENSG00000013810 | TACC3     |
| 561 | ENSG00000006625 | GGCT      |
| 562 | ENSG00000235571 | SNX18P14  |
| 563 | ENSG00000235109 | ZSCAN31   |
| 564 | ENSG00000214357 | NEURL1B   |
| 565 | ENSG00000198900 | TOP1      |
| 566 | ENSG00000198826 | ARHGAP11A |
| 567 | ENSG00000198554 | WDHD1     |
| 568 | ENSG00000189337 | KAZN      |
| 569 | ENSG00000187837 | H1-2      |
| 570 | ENSG00000183741 | CBX6      |
| 571 | ENSG00000173848 | NET1      |
| 572 | ENSG00000171792 | RHNO1     |
| 573 | ENSG00000170734 | POLH      |
| 574 | ENSG00000168916 | ZNF608    |
| 575 | ENSG00000168078 | PBK       |
| 576 | ENSG00000166004 | CEP295    |
| 577 | ENSG00000164211 | STARD4    |
| 578 | ENSG00000163072 | NOSTRIN   |
| 579 | ENSG00000162783 | IER5      |
| 580 | ENSG00000161888 | SPC24     |
| 581 | ENSG00000161800 | RACGAP1   |
| 582 | ENSG00000160298 | C21orf58  |
| 583 | ENSG00000156463 | SH3RF2    |
| 584 | ENSG00000154640 | BTG3      |
| 585 | ENSG00000151276 | MAGI1     |
| 586 | ENSG00000149503 | INCENP    |
| 587 | ENSG00000146278 | PNRC1     |
| 588 | ENSG00000143322 | ABL2      |
| 589 | ENSG00000142149 | HUNK      |
| 590 | ENSG00000140332 | TLE3      |
| 591 | ENSG00000138658 | ZGRF1     |
| 592 | ENSG00000138376 | BARD1     |
| 593 | ENSG00000136108 | CKAP2     |
| 594 | ENSG00000134222 | PSRC1     |
| 595 | ENSG00000132780 | NASP      |
| 596 | ENSG00000128510 | CPA4      |
| 597 | ENSG00000127586 | CHTF18    |
| 598 | ENSG00000124216 | SNAI1     |

|     |                 |            |
|-----|-----------------|------------|
| 599 | ENSG00000123933 | MXD4       |
| 600 | ENSG00000122644 | ARL4A      |
| 601 | ENSG00000122566 | HNRNPA2B1  |
| 602 | ENSG00000118263 | KLF7       |
| 603 | ENSG00000118193 | KIF14      |
| 604 | ENSG00000112759 | SLC29A1    |
| 605 | ENSG00000105991 | HOXA1      |
| 606 | ENSG00000105325 | FZR1       |
| 607 | ENSG00000105270 | CLIP3      |
| 608 | ENSG00000104147 | OIP5       |
| 609 | ENSG00000103540 | CCP110     |
| 610 | ENSG00000101104 | PABPC1L    |
| 611 | ENSG00000100714 | MTHFD1     |
| 612 | ENSG00000099810 | MTAP       |
| 613 | ENSG00000095777 | MYO3A      |
| 614 | ENSG00000092140 | G2E3       |
| 615 | ENSG00000089693 | MLF2       |
| 616 | ENSG00000088325 | TPX2       |
| 617 | ENSG00000081019 | RSBN1      |
| 618 | ENSG00000077549 | CAPZB      |
| 619 | ENSG00000076382 | SPAG5      |
| 620 | ENSG00000075702 | WDR62      |
| 621 | ENSG00000070882 | OSBPL3     |
| 622 | ENSG00000068028 | RASSF1     |
| 623 | ENSG00000066279 | ASPM       |
| 624 | ENSG00000004897 | CDC27      |
| 625 | ENSG00000285730 | Pseudogene |
| 626 | ENSG00000283269 | Pseudogene |
| 627 | ENSG00000278259 | MYO19      |
| 628 | ENSG00000221978 | CCNL2      |
| 629 | ENSG00000213551 | DNAJC9     |
| 630 | ENSG00000196550 | FAM72A     |
| 631 | ENSG00000188610 | FAM72B     |
| 632 | ENSG00000186638 | KIF24      |
| 633 | ENSG00000183856 | IQGAP3     |
| 634 | ENSG00000181544 | FANCB      |
| 635 | ENSG00000180611 | MB21D2     |
| 636 | ENSG00000178999 | AURKB      |
| 637 | ENSG00000178343 | SHISA3     |
| 638 | ENSG00000178295 | GEN1       |
| 639 | ENSG00000178105 | DDX10      |
| 640 | ENSG00000176225 | RTTN       |

|     |                 |         |
|-----|-----------------|---------|
| 641 | ENSG00000175606 | TMEM70  |
| 642 | ENSG00000174371 | EXO1    |
| 643 | ENSG00000172667 | ZMAT3   |
| 644 | ENSG00000171940 | ZNF217  |
| 645 | ENSG00000170852 | KBTBD2  |
| 646 | ENSG00000169490 | TM2D2   |
| 647 | ENSG00000168061 | SAC3D1  |
| 648 | ENSG00000168010 | ATG16L2 |
| 649 | ENSG00000166925 | TSC22D4 |
| 650 | ENSG00000165886 | UBTD1   |
| 651 | ENSG00000165494 | PCF11   |
| 652 | ENSG00000165490 | DDIAS   |
| 653 | ENSG00000164985 | PSIP1   |
| 654 | ENSG00000164109 | MAD2L1  |
| 655 | ENSG00000164087 | POC1A   |
| 656 | ENSG00000162929 | SANBR   |
| 657 | ENSG00000162521 | RBBP4   |
| 658 | ENSG00000161011 | SQSTM1  |
| 659 | ENSG00000154473 | BUB3    |
| 660 | ENSG00000151725 | CENPU   |
| 661 | ENSG00000151692 | RNF144A |
| 662 | ENSG00000146834 | MEPCE   |
| 663 | ENSG00000145526 | CDH18   |
| 664 | ENSG00000144395 | CCDC150 |
| 665 | ENSG00000144048 | DUSP11  |
| 666 | ENSG00000143228 | NUF2    |
| 667 | ENSG00000140443 | IGF1R   |
| 668 | ENSG00000138160 | KIF11   |
| 669 | ENSG00000136492 | BRIP1   |
| 670 | ENSG00000133454 | MYO18B  |
| 671 | ENSG00000133121 | STARD13 |
| 672 | ENSG00000133119 | RFC3    |
| 673 | ENSG00000130299 | GTPBP3  |
| 674 | ENSG00000124762 | CDKN1A  |
| 675 | ENSG00000123737 | EXOSC9  |
| 676 | ENSG00000121957 | GPSM2   |
| 677 | ENSG00000121741 | ZMYM2   |
| 678 | ENSG00000119333 | DYNC2I2 |
| 679 | ENSG00000111696 | NT5DC3  |
| 680 | ENSG00000106211 | HSPB1   |
| 681 | ENSG00000105856 | HBP1    |
| 682 | ENSG00000104671 | DCTN6   |

|     |                 |                 |
|-----|-----------------|-----------------|
| 683 | ENSG00000101868 | POLA1           |
| 684 | ENSG00000101574 | METTL4          |
| 685 | ENSG00000101138 | CSTF1           |
| 686 | ENSG00000078900 | TP73            |
| 687 | ENSG00000075618 | FSCN1           |
| 688 | ENSG00000074266 | EED             |
| 689 | ENSG00000067082 | KLF6            |
| 690 | ENSG00000042088 | TDP1            |
| 691 | ENSG00000006634 | DBF4            |
| 692 | ENSG00000284946 | Pseudogene      |
| 693 | ENSG00000276966 | H4C5            |
| 694 | ENSG00000255152 | MSH5-<br>SAPCD1 |
| 695 | ENSG00000237649 | KIFC1           |
| 696 | ENSG00000205212 | CCDC144NL       |
| 697 | ENSG00000204580 | DDR1            |
| 698 | ENSG00000204435 | CSNK2B          |
| 699 | ENSG00000197172 | MAGEA6          |
| 700 | ENSG00000186193 | SAPCD2          |
| 701 | ENSG00000184156 | KCNQ3           |
| 702 | ENSG00000178966 | RMI1            |
| 703 | ENSG00000177917 | ARL6IP6         |
| 704 | ENSG00000175592 | FOSL1           |
| 705 | ENSG00000173559 | NABP1           |
| 706 | ENSG00000171793 | CTPS1           |
| 707 | ENSG00000165891 | E2F7            |
| 708 | ENSG00000165502 | RPL36AL         |
| 709 | ENSG00000163808 | KIF15           |
| 710 | ENSG00000163535 | SGO2            |
| 711 | ENSG00000163507 | CIP2A           |
| 712 | ENSG00000151466 | SCLT1           |
| 713 | ENSG00000149639 | SOGA1           |
| 714 | ENSG00000142731 | PLK4            |
| 715 | ENSG00000139354 | GAS2L3          |
| 716 | ENSG00000137812 | KNL1            |
| 717 | ENSG00000137135 | ARHGEF39        |
| 718 | ENSG00000132485 | ZRANB2          |
| 719 | ENSG00000131462 | TUBG1           |
| 720 | ENSG00000129810 | SGO1            |
| 721 | ENSG00000125319 | HROB            |
| 722 | ENSG00000120694 | HSPH1           |
| 723 | ENSG00000119771 | KLHL29          |

|     |                 |              |
|-----|-----------------|--------------|
| 724 | ENSG00000118655 | DCLRE1B      |
| 725 | ENSG00000118181 | RPS25        |
| 726 | ENSG00000115159 | GPD2         |
| 727 | ENSG00000113569 | NUP155       |
| 728 | ENSG00000109805 | NCAPG        |
| 729 | ENSG00000101945 | SUV39H1      |
| 730 | ENSG00000100242 | SUN2         |
| 731 | ENSG00000072864 | NDE1         |
| 732 | ENSG00000068885 | IFT80        |
| 733 | ENSG00000066322 | ELOVL1       |
| 734 | ENSG00000040275 | SPDL1        |
| 735 | ENSG00000033030 | ZCCHC8       |
| 736 | ENSG00000284906 | ARHGAP11B    |
| 737 | ENSG00000203811 | H3C14        |
| 738 | ENSG00000198355 | PIM3         |
| 739 | ENSG00000198088 | NUP62CL      |
| 740 | ENSG00000189060 | H1-0         |
| 741 | ENSG00000188529 | SRSF10       |
| 742 | ENSG00000188312 | CENPP        |
| 743 | ENSG00000187231 | SESTD1       |
| 744 | ENSG00000183864 | TOB2         |
| 745 | ENSG00000178974 | FBXO34       |
| 746 | ENSG00000177879 | AP3S1        |
| 747 | ENSG00000172765 | TMCC1        |
| 748 | ENSG00000166441 | RPL27A       |
| 749 | ENSG00000161692 | DBF4B        |
| 750 | ENSG00000158402 | CDC25C       |
| 751 | ENSG00000158373 | H2BC5        |
| 752 | ENSG00000154920 | EME1         |
| 753 | ENSG00000143942 | CHAC2        |
| 754 | ENSG00000138182 | KIF20B       |
| 755 | ENSG00000134291 | TMEM106C     |
| 756 | ENSG00000127337 | YEATS4       |
| 757 | ENSG00000125871 | MGME1        |
| 758 | ENSG00000121621 | KIF18A       |
| 759 | ENSG00000117069 | ST6GALNAC5   |
| 760 | ENSG00000115163 | CENPA        |
| 761 | ENSG00000111206 | FOXM1        |
| 762 | ENSG00000100519 | PSMC6        |
| 763 | ENSG00000070950 | RAD18        |
| 764 | ENSG00000051341 | POLQ         |
| 765 | ENSG00000278591 | LOC124904144 |



|     |                 |              |
|-----|-----------------|--------------|
| 766 | ENSG00000278048 | LOC124904138 |
| 767 | ENSG00000277903 | LOC124904140 |
| 768 | ENSG00000276596 | LOC124904139 |
| 769 | ENSG00000275616 | LOC124904135 |
| 770 | ENSG00000275219 | LOC124904143 |
| 771 | ENSG00000274862 | LOC124904141 |
| 772 | ENSG00000274585 | RNU2-1       |
| 773 | ENSG00000274432 | LOC124904137 |
| 774 | ENSG00000274062 | LOC124904142 |
| 775 | ENSG00000207507 | RNU6-9       |
| 776 | ENSG00000207357 | RNU6-2       |
| 777 | ENSG00000207041 | RNU6-3P      |
| 778 | ENSG00000206965 | RNU6-5P      |
| 779 | ENSG00000206932 | RNU6-4P      |
| 780 | ENSG00000206899 | RNU6-36P     |
| 781 | ENSG00000184602 | SNN          |
| 782 | ENSG00000184260 | H2AC20       |
| 783 | ENSG00000176208 | ATAD5        |
| 784 | ENSG00000167011 | NAT16        |
| 785 | ENSG00000105821 | DNAJC2       |
| 786 | ENSG00000088305 | DNMT3B       |
| 787 | ENSG00000061337 | LZTS1        |
| 788 | ENSG00000031691 | CENPQ        |
