# Supplementary material for: Identification of Human Cell Cycle Phase Markers Based on Single‐Cell RNA‐Seq Data by Using Machine Learning Methods
Source: Hindawi journal article supplement (doi:10.1155/2022/2516653), 2022-01-01
Supplement: f2 [file 2516653.f2.pdf]

**Table S2.** Performance of IFS with different classification algorithms

(1) Performance of DT on top features yielded by three feature selection methods

| <b>mRMR</b>                |           |             |          |            |            |
|----------------------------|-----------|-------------|----------|------------|------------|
| <b>Numbers of features</b> | <b>G1</b> | <b>G2/M</b> | <b>S</b> | <b>ACC</b> | <b>MCC</b> |
| 1                          | 0.913     | 0.643       | 0.557    | 0.704      | 0.555      |
| 2                          | 0.922     | 0.762       | 0.677    | 0.787      | 0.680      |
| 3                          | 0.919     | 0.716       | 0.671    | 0.768      | 0.651      |
| 4                          | 0.925     | 0.762       | 0.704    | 0.797      | 0.695      |
| 5                          | 0.899     | 0.765       | 0.695    | 0.786      | 0.679      |
| 6                          | 0.902     | 0.734       | 0.665    | 0.767      | 0.649      |
| 7                          | 0.890     | 0.739       | 0.701    | 0.776      | 0.664      |
| 8                          | 0.893     | 0.739       | 0.695    | 0.775      | 0.662      |
| 9                          | 0.896     | 0.705       | 0.686    | 0.761      | 0.642      |
| 10                         | 0.905     | 0.760       | 0.692    | 0.785      | 0.678      |
| 11                         | 0.902     | 0.749       | 0.680    | 0.777      | 0.665      |
| 12                         | 0.910     | 0.783       | 0.692    | 0.796      | 0.693      |
| 13                         | 0.913     | 0.726       | 0.692    | 0.776      | 0.664      |
| 14                         | 0.928     | 0.680       | 0.701    | 0.767      | 0.651      |
| 15                         | 0.882     | 0.739       | 0.698    | 0.772      | 0.659      |
| 16                         | 0.908     | 0.744       | 0.680    | 0.777      | 0.665      |
| 17                         | 0.916     | 0.749       | 0.674    | 0.780      | 0.669      |
| 18                         | 0.919     | 0.755       | 0.656    | 0.777      | 0.665      |
| 19                         | 0.899     | 0.793       | 0.701    | 0.799      | 0.697      |
| 20                         | 0.913     | 0.775       | 0.695    | 0.795      | 0.692      |
| 21                         | 0.899     | 0.744       | 0.683    | 0.775      | 0.662      |
| 22                         | 0.919     | 0.755       | 0.707    | 0.793      | 0.689      |
| 23                         | 0.925     | 0.780       | 0.698    | 0.801      | 0.701      |
| 24                         | 0.928     | 0.742       | 0.716    | 0.794      | 0.691      |
| 25                         | 0.893     | 0.755       | 0.751    | 0.799      | 0.698      |
| 26                         | 0.934     | 0.783       | 0.704    | 0.807      | 0.710      |
| 27                         | 0.948     | 0.770       | 0.719    | 0.812      | 0.717      |
| 28                         | 0.910     | 0.731       | 0.731    | 0.789      | 0.684      |
| 29                         | 0.919     | 0.765       | 0.722    | 0.801      | 0.702      |
| 30                         | 0.931     | 0.783       | 0.710    | 0.808      | 0.711      |
| 31                         | 0.916     | 0.778       | 0.716    | 0.803      | 0.704      |
| 32                         | 0.913     | 0.791       | 0.746    | 0.816      | 0.724      |
| 33                         | 0.913     | 0.755       | 0.671    | 0.780      | 0.669      |
| 34                         | 0.934     | 0.755       | 0.707    | 0.798      | 0.696      |
| 35                         | 0.925     | 0.770       | 0.734    | 0.809      | 0.713      |
| 36                         | 0.922     | 0.793       | 0.743    | 0.819      | 0.728      |
| 37                         | 0.899     | 0.780       | 0.737    | 0.805      | 0.707      |

|    |       |       |       |       |       |
|----|-------|-------|-------|-------|-------|
| 38 | 0.910 | 0.762 | 0.707 | 0.793 | 0.689 |
| 39 | 0.896 | 0.775 | 0.686 | 0.786 | 0.679 |
| 40 | 0.936 | 0.775 | 0.707 | 0.806 | 0.709 |
| 41 | 0.913 | 0.773 | 0.713 | 0.799 | 0.699 |
| 42 | 0.910 | 0.791 | 0.716 | 0.806 | 0.708 |
| 43 | 0.916 | 0.811 | 0.713 | 0.814 | 0.721 |
| 44 | 0.925 | 0.765 | 0.749 | 0.812 | 0.718 |
| 45 | 0.905 | 0.778 | 0.725 | 0.802 | 0.703 |
| 46 | 0.919 | 0.762 | 0.734 | 0.804 | 0.706 |
| 47 | 0.922 | 0.765 | 0.749 | 0.811 | 0.716 |
| 48 | 0.925 | 0.780 | 0.734 | 0.813 | 0.719 |
| 49 | 0.905 | 0.767 | 0.731 | 0.800 | 0.700 |
| 50 | 0.931 | 0.778 | 0.731 | 0.813 | 0.718 |
| 51 | 0.922 | 0.780 | 0.734 | 0.812 | 0.717 |
| 52 | 0.910 | 0.788 | 0.710 | 0.803 | 0.704 |
| 53 | 0.913 | 0.783 | 0.737 | 0.811 | 0.716 |
| 54 | 0.919 | 0.806 | 0.749 | 0.825 | 0.737 |
| 55 | 0.902 | 0.798 | 0.740 | 0.813 | 0.720 |
| 56 | 0.902 | 0.760 | 0.746 | 0.801 | 0.702 |
| 57 | 0.910 | 0.798 | 0.766 | 0.825 | 0.737 |
| 58 | 0.893 | 0.793 | 0.749 | 0.812 | 0.717 |
| 59 | 0.902 | 0.801 | 0.749 | 0.817 | 0.726 |
| 60 | 0.908 | 0.824 | 0.722 | 0.819 | 0.728 |
| 61 | 0.910 | 0.791 | 0.749 | 0.816 | 0.724 |
| 62 | 0.922 | 0.814 | 0.719 | 0.819 | 0.728 |
| 63 | 0.922 | 0.796 | 0.707 | 0.809 | 0.713 |
| 64 | 0.910 | 0.780 | 0.722 | 0.804 | 0.706 |
| 65 | 0.916 | 0.773 | 0.737 | 0.808 | 0.712 |
| 66 | 0.919 | 0.824 | 0.751 | 0.832 | 0.748 |
| 67 | 0.899 | 0.765 | 0.754 | 0.805 | 0.708 |
| 68 | 0.916 | 0.804 | 0.728 | 0.816 | 0.724 |
| 69 | 0.925 | 0.778 | 0.728 | 0.810 | 0.714 |
| 70 | 0.902 | 0.773 | 0.775 | 0.815 | 0.724 |
| 71 | 0.925 | 0.809 | 0.754 | 0.829 | 0.744 |
| 72 | 0.908 | 0.806 | 0.760 | 0.825 | 0.737 |
| 73 | 0.919 | 0.780 | 0.737 | 0.812 | 0.717 |
| 74 | 0.913 | 0.780 | 0.751 | 0.814 | 0.722 |
| 75 | 0.925 | 0.775 | 0.737 | 0.812 | 0.717 |
| 76 | 0.919 | 0.806 | 0.740 | 0.822 | 0.732 |
| 77 | 0.908 | 0.791 | 0.734 | 0.811 | 0.716 |
| 78 | 0.908 | 0.783 | 0.754 | 0.814 | 0.722 |
| 79 | 0.905 | 0.804 | 0.751 | 0.820 | 0.730 |

|     |       |       |       |       |       |
|-----|-------|-------|-------|-------|-------|
| 80  | 0.913 | 0.786 | 0.743 | 0.813 | 0.720 |
| 81  | 0.913 | 0.786 | 0.754 | 0.817 | 0.726 |
| 82  | 0.902 | 0.796 | 0.716 | 0.805 | 0.707 |
| 83  | 0.913 | 0.798 | 0.731 | 0.814 | 0.721 |
| 84  | 0.873 | 0.791 | 0.749 | 0.804 | 0.706 |
| 85  | 0.916 | 0.791 | 0.731 | 0.813 | 0.718 |
| 86  | 0.905 | 0.814 | 0.763 | 0.828 | 0.741 |
| 87  | 0.916 | 0.806 | 0.754 | 0.826 | 0.738 |
| 88  | 0.922 | 0.793 | 0.751 | 0.822 | 0.733 |
| 89  | 0.916 | 0.806 | 0.743 | 0.822 | 0.732 |
| 90  | 0.908 | 0.793 | 0.737 | 0.813 | 0.718 |
| 91  | 0.908 | 0.783 | 0.713 | 0.801 | 0.701 |
| 92  | 0.916 | 0.762 | 0.749 | 0.808 | 0.712 |
| 93  | 0.902 | 0.762 | 0.734 | 0.799 | 0.698 |
| 94  | 0.925 | 0.775 | 0.731 | 0.810 | 0.714 |
| 95  | 0.919 | 0.786 | 0.710 | 0.805 | 0.707 |
| 96  | 0.905 | 0.780 | 0.731 | 0.805 | 0.707 |
| 97  | 0.913 | 0.817 | 0.710 | 0.814 | 0.721 |
| 98  | 0.896 | 0.773 | 0.749 | 0.805 | 0.708 |
| 99  | 0.925 | 0.809 | 0.728 | 0.821 | 0.731 |
| 100 | 0.902 | 0.793 | 0.743 | 0.813 | 0.719 |
| 101 | 0.899 | 0.770 | 0.737 | 0.801 | 0.702 |
| 102 | 0.902 | 0.798 | 0.728 | 0.810 | 0.714 |
| 103 | 0.916 | 0.798 | 0.698 | 0.805 | 0.707 |
| 104 | 0.925 | 0.786 | 0.746 | 0.818 | 0.727 |
| 105 | 0.908 | 0.791 | 0.713 | 0.804 | 0.706 |
| 106 | 0.916 | 0.783 | 0.734 | 0.811 | 0.716 |
| 107 | 0.905 | 0.796 | 0.704 | 0.802 | 0.703 |
| 108 | 0.919 | 0.793 | 0.746 | 0.819 | 0.728 |
| 109 | 0.925 | 0.809 | 0.760 | 0.831 | 0.747 |
| 110 | 0.902 | 0.752 | 0.740 | 0.797 | 0.695 |
| 111 | 0.934 | 0.788 | 0.743 | 0.821 | 0.731 |
| 112 | 0.905 | 0.811 | 0.743 | 0.820 | 0.730 |
| 113 | 0.910 | 0.780 | 0.749 | 0.813 | 0.719 |
| 114 | 0.905 | 0.788 | 0.737 | 0.810 | 0.714 |
| 115 | 0.925 | 0.811 | 0.737 | 0.825 | 0.737 |
| 116 | 0.913 | 0.770 | 0.746 | 0.809 | 0.713 |
| 117 | 0.913 | 0.796 | 0.734 | 0.814 | 0.721 |
| 118 | 0.887 | 0.780 | 0.731 | 0.799 | 0.699 |
| 119 | 0.910 | 0.814 | 0.751 | 0.826 | 0.738 |
| 120 | 0.905 | 0.796 | 0.692 | 0.799 | 0.697 |
| 121 | 0.884 | 0.773 | 0.751 | 0.802 | 0.704 |

|     |       |       |       |       |       |
|-----|-------|-------|-------|-------|-------|
| 122 | 0.899 | 0.778 | 0.734 | 0.803 | 0.705 |
| 123 | 0.910 | 0.809 | 0.740 | 0.820 | 0.730 |
| 124 | 0.913 | 0.778 | 0.763 | 0.817 | 0.726 |
| 125 | 0.922 | 0.773 | 0.707 | 0.800 | 0.700 |
| 126 | 0.893 | 0.801 | 0.710 | 0.802 | 0.703 |
| 127 | 0.896 | 0.793 | 0.728 | 0.806 | 0.708 |
| 128 | 0.899 | 0.817 | 0.749 | 0.822 | 0.732 |
| 129 | 0.902 | 0.783 | 0.763 | 0.815 | 0.723 |
| 130 | 0.910 | 0.801 | 0.728 | 0.813 | 0.720 |
| 131 | 0.913 | 0.788 | 0.713 | 0.805 | 0.707 |
| 132 | 0.919 | 0.780 | 0.731 | 0.810 | 0.714 |
| 133 | 0.916 | 0.780 | 0.710 | 0.802 | 0.703 |
| 134 | 0.916 | 0.760 | 0.719 | 0.798 | 0.696 |
| 135 | 0.928 | 0.788 | 0.743 | 0.819 | 0.728 |
| 136 | 0.922 | 0.817 | 0.710 | 0.817 | 0.725 |
| 137 | 0.873 | 0.739 | 0.704 | 0.771 | 0.657 |
| 138 | 0.902 | 0.770 | 0.746 | 0.805 | 0.708 |
| 139 | 0.928 | 0.762 | 0.734 | 0.807 | 0.711 |
| 140 | 0.931 | 0.791 | 0.734 | 0.818 | 0.727 |
| 141 | 0.913 | 0.780 | 0.716 | 0.803 | 0.704 |
| 142 | 0.910 | 0.806 | 0.737 | 0.818 | 0.727 |
| 143 | 0.905 | 0.770 | 0.743 | 0.805 | 0.708 |
| 144 | 0.910 | 0.798 | 0.689 | 0.800 | 0.700 |
| 145 | 0.919 | 0.788 | 0.734 | 0.813 | 0.720 |
| 146 | 0.905 | 0.755 | 0.737 | 0.798 | 0.697 |
| 147 | 0.919 | 0.760 | 0.704 | 0.794 | 0.690 |
| 148 | 0.916 | 0.786 | 0.734 | 0.812 | 0.717 |
| 149 | 0.910 | 0.798 | 0.698 | 0.803 | 0.704 |
| 150 | 0.931 | 0.804 | 0.683 | 0.807 | 0.710 |
| 151 | 0.910 | 0.814 | 0.695 | 0.808 | 0.711 |
| 152 | 0.931 | 0.775 | 0.734 | 0.813 | 0.718 |
| 153 | 0.916 | 0.806 | 0.704 | 0.810 | 0.714 |
| 154 | 0.910 | 0.770 | 0.740 | 0.806 | 0.709 |
| 155 | 0.919 | 0.788 | 0.757 | 0.821 | 0.731 |
| 156 | 0.908 | 0.796 | 0.743 | 0.815 | 0.723 |
| 157 | 0.908 | 0.747 | 0.746 | 0.799 | 0.698 |
| 158 | 0.916 | 0.829 | 0.760 | 0.836 | 0.753 |
| 159 | 0.916 | 0.786 | 0.743 | 0.814 | 0.721 |
| 160 | 0.919 | 0.806 | 0.725 | 0.817 | 0.725 |
| 161 | 0.916 | 0.749 | 0.719 | 0.794 | 0.691 |
| 162 | 0.896 | 0.788 | 0.728 | 0.804 | 0.706 |
| 163 | 0.913 | 0.786 | 0.722 | 0.807 | 0.710 |

|     |       |       |       |       |       |
|-----|-------|-------|-------|-------|-------|
| 164 | 0.910 | 0.783 | 0.731 | 0.808 | 0.711 |
| 165 | 0.916 | 0.783 | 0.746 | 0.814 | 0.721 |
| 166 | 0.899 | 0.793 | 0.746 | 0.813 | 0.719 |
| 167 | 0.922 | 0.796 | 0.743 | 0.820 | 0.730 |
| 168 | 0.910 | 0.773 | 0.722 | 0.801 | 0.701 |
| 169 | 0.910 | 0.747 | 0.746 | 0.799 | 0.700 |
| 170 | 0.925 | 0.809 | 0.710 | 0.815 | 0.722 |
| 171 | 0.925 | 0.762 | 0.722 | 0.802 | 0.703 |
| 172 | 0.905 | 0.773 | 0.719 | 0.799 | 0.697 |
| 173 | 0.908 | 0.793 | 0.734 | 0.812 | 0.717 |
| 174 | 0.902 | 0.796 | 0.719 | 0.806 | 0.708 |
| 175 | 0.916 | 0.783 | 0.716 | 0.805 | 0.707 |
| 176 | 0.925 | 0.783 | 0.781 | 0.828 | 0.743 |
| 177 | 0.916 | 0.739 | 0.740 | 0.797 | 0.696 |
| 178 | 0.899 | 0.796 | 0.716 | 0.804 | 0.706 |
| 179 | 0.902 | 0.819 | 0.740 | 0.821 | 0.731 |
| 180 | 0.908 | 0.793 | 0.707 | 0.803 | 0.704 |
| 181 | 0.916 | 0.765 | 0.740 | 0.806 | 0.709 |
| 182 | 0.922 | 0.775 | 0.719 | 0.805 | 0.707 |
| 183 | 0.934 | 0.793 | 0.734 | 0.820 | 0.730 |
| 184 | 0.913 | 0.749 | 0.734 | 0.798 | 0.696 |
| 185 | 0.925 | 0.770 | 0.701 | 0.799 | 0.697 |
| 186 | 0.916 | 0.775 | 0.725 | 0.805 | 0.707 |
| 187 | 0.916 | 0.775 | 0.704 | 0.799 | 0.697 |
| 188 | 0.925 | 0.811 | 0.728 | 0.822 | 0.732 |
| 189 | 0.899 | 0.778 | 0.728 | 0.801 | 0.702 |
| 190 | 0.922 | 0.760 | 0.689 | 0.790 | 0.684 |
| 191 | 0.916 | 0.793 | 0.725 | 0.812 | 0.717 |
| 192 | 0.913 | 0.783 | 0.722 | 0.806 | 0.709 |
| 193 | 0.931 | 0.786 | 0.734 | 0.816 | 0.724 |
| 194 | 0.934 | 0.747 | 0.695 | 0.791 | 0.686 |
| 195 | 0.905 | 0.752 | 0.725 | 0.793 | 0.689 |
| 196 | 0.919 | 0.793 | 0.754 | 0.822 | 0.733 |
| 197 | 0.928 | 0.788 | 0.719 | 0.812 | 0.717 |
| 198 | 0.905 | 0.760 | 0.680 | 0.782 | 0.672 |
| 199 | 0.936 | 0.752 | 0.695 | 0.794 | 0.690 |
| 200 | 0.931 | 0.773 | 0.716 | 0.806 | 0.709 |
| 201 | 0.925 | 0.796 | 0.743 | 0.821 | 0.731 |
| 202 | 0.910 | 0.775 | 0.716 | 0.800 | 0.700 |
| 203 | 0.910 | 0.767 | 0.719 | 0.799 | 0.697 |
| 204 | 0.919 | 0.765 | 0.746 | 0.809 | 0.713 |
| 205 | 0.931 | 0.809 | 0.707 | 0.816 | 0.724 |

|     |       |       |       |       |       |
|-----|-------|-------|-------|-------|-------|
| 206 | 0.913 | 0.739 | 0.737 | 0.795 | 0.692 |
| 207 | 0.931 | 0.775 | 0.713 | 0.806 | 0.709 |
| 208 | 0.939 | 0.783 | 0.734 | 0.818 | 0.727 |
| 209 | 0.922 | 0.770 | 0.707 | 0.799 | 0.699 |
| 210 | 0.925 | 0.793 | 0.722 | 0.813 | 0.720 |
| 211 | 0.905 | 0.814 | 0.692 | 0.805 | 0.707 |
| 212 | 0.942 | 0.773 | 0.734 | 0.815 | 0.723 |
| 213 | 0.916 | 0.788 | 0.719 | 0.808 | 0.711 |
| 214 | 0.934 | 0.793 | 0.713 | 0.813 | 0.720 |
| 215 | 0.908 | 0.755 | 0.719 | 0.793 | 0.689 |
| 216 | 0.934 | 0.788 | 0.754 | 0.825 | 0.737 |
| 217 | 0.913 | 0.778 | 0.710 | 0.800 | 0.700 |
| 218 | 0.928 | 0.783 | 0.722 | 0.811 | 0.716 |
| 219 | 0.913 | 0.770 | 0.707 | 0.797 | 0.694 |
| 220 | 0.919 | 0.786 | 0.728 | 0.811 | 0.716 |
| 221 | 0.934 | 0.778 | 0.722 | 0.811 | 0.716 |
| 222 | 0.928 | 0.788 | 0.731 | 0.815 | 0.722 |
| 223 | 0.913 | 0.817 | 0.740 | 0.824 | 0.735 |
| 224 | 0.902 | 0.757 | 0.754 | 0.803 | 0.706 |
| 225 | 0.916 | 0.783 | 0.722 | 0.807 | 0.710 |
| 226 | 0.931 | 0.786 | 0.725 | 0.813 | 0.720 |
| 227 | 0.936 | 0.783 | 0.743 | 0.820 | 0.730 |
| 228 | 0.910 | 0.793 | 0.728 | 0.811 | 0.715 |
| 229 | 0.913 | 0.762 | 0.743 | 0.805 | 0.708 |
| 230 | 0.925 | 0.778 | 0.716 | 0.806 | 0.709 |
| 231 | 0.936 | 0.809 | 0.704 | 0.817 | 0.725 |
| 232 | 0.919 | 0.765 | 0.740 | 0.807 | 0.710 |
| 233 | 0.939 | 0.736 | 0.722 | 0.798 | 0.696 |
| 234 | 0.913 | 0.778 | 0.707 | 0.799 | 0.699 |
| 235 | 0.913 | 0.775 | 0.707 | 0.799 | 0.697 |
| 236 | 0.936 | 0.788 | 0.707 | 0.811 | 0.716 |
| 237 | 0.905 | 0.760 | 0.734 | 0.799 | 0.698 |
| 238 | 0.896 | 0.778 | 0.722 | 0.799 | 0.698 |
| 239 | 0.919 | 0.775 | 0.677 | 0.791 | 0.686 |
| 240 | 0.922 | 0.778 | 0.725 | 0.808 | 0.711 |
| 241 | 0.910 | 0.773 | 0.749 | 0.810 | 0.715 |
| 242 | 0.916 | 0.804 | 0.704 | 0.809 | 0.713 |
| 243 | 0.905 | 0.780 | 0.728 | 0.804 | 0.706 |
| 244 | 0.893 | 0.744 | 0.689 | 0.775 | 0.662 |
| 245 | 0.919 | 0.796 | 0.740 | 0.818 | 0.727 |
| 246 | 0.910 | 0.762 | 0.719 | 0.797 | 0.695 |
| 247 | 0.931 | 0.786 | 0.728 | 0.814 | 0.721 |

|     |       |       |       |       |       |
|-----|-------|-------|-------|-------|-------|
| 248 | 0.916 | 0.747 | 0.728 | 0.796 | 0.693 |
| 249 | 0.916 | 0.788 | 0.680 | 0.796 | 0.693 |
| 250 | 0.905 | 0.814 | 0.731 | 0.817 | 0.725 |
| 251 | 0.931 | 0.798 | 0.754 | 0.828 | 0.741 |
| 252 | 0.908 | 0.770 | 0.760 | 0.812 | 0.718 |
| 253 | 0.925 | 0.770 | 0.725 | 0.806 | 0.709 |
| 254 | 0.910 | 0.798 | 0.731 | 0.813 | 0.720 |
| 255 | 0.893 | 0.798 | 0.725 | 0.806 | 0.709 |
| 256 | 0.922 | 0.765 | 0.698 | 0.795 | 0.692 |
| 257 | 0.934 | 0.755 | 0.710 | 0.799 | 0.697 |
| 258 | 0.913 | 0.760 | 0.722 | 0.798 | 0.696 |
| 259 | 0.913 | 0.775 | 0.689 | 0.793 | 0.689 |
| 260 | 0.931 | 0.747 | 0.710 | 0.795 | 0.692 |
| 261 | 0.908 | 0.791 | 0.707 | 0.802 | 0.703 |
| 262 | 0.890 | 0.791 | 0.737 | 0.806 | 0.709 |
| 263 | 0.934 | 0.752 | 0.749 | 0.810 | 0.715 |
| 264 | 0.939 | 0.791 | 0.713 | 0.814 | 0.721 |
| 265 | 0.925 | 0.806 | 0.707 | 0.813 | 0.720 |
| 266 | 0.928 | 0.775 | 0.710 | 0.804 | 0.706 |
| 267 | 0.916 | 0.742 | 0.689 | 0.782 | 0.672 |
| 268 | 0.919 | 0.752 | 0.728 | 0.799 | 0.698 |
| 269 | 0.899 | 0.783 | 0.760 | 0.813 | 0.720 |
| 270 | 0.922 | 0.796 | 0.713 | 0.811 | 0.715 |
| 271 | 0.925 | 0.773 | 0.737 | 0.811 | 0.716 |
| 272 | 0.928 | 0.778 | 0.698 | 0.801 | 0.702 |
| 273 | 0.919 | 0.747 | 0.737 | 0.799 | 0.699 |
| 274 | 0.922 | 0.819 | 0.734 | 0.826 | 0.738 |
| 275 | 0.919 | 0.775 | 0.728 | 0.807 | 0.710 |
| 276 | 0.916 | 0.786 | 0.722 | 0.808 | 0.711 |
| 277 | 0.913 | 0.798 | 0.743 | 0.818 | 0.727 |
| 278 | 0.928 | 0.770 | 0.704 | 0.800 | 0.700 |
| 279 | 0.908 | 0.780 | 0.751 | 0.813 | 0.719 |
| 280 | 0.913 | 0.788 | 0.710 | 0.804 | 0.706 |
| 281 | 0.908 | 0.775 | 0.734 | 0.805 | 0.707 |
| 282 | 0.934 | 0.801 | 0.740 | 0.825 | 0.737 |
| 283 | 0.916 | 0.788 | 0.740 | 0.814 | 0.721 |
| 284 | 0.905 | 0.778 | 0.707 | 0.797 | 0.694 |
| 285 | 0.899 | 0.788 | 0.698 | 0.796 | 0.693 |
| 286 | 0.916 | 0.731 | 0.754 | 0.799 | 0.699 |
| 287 | 0.928 | 0.767 | 0.710 | 0.801 | 0.702 |
| 288 | 0.908 | 0.791 | 0.728 | 0.809 | 0.713 |
| 289 | 0.910 | 0.783 | 0.731 | 0.808 | 0.712 |

|     |       |       |       |       |       |
|-----|-------|-------|-------|-------|-------|
| 290 | 0.913 | 0.798 | 0.698 | 0.804 | 0.705 |
| 291 | 0.899 | 0.793 | 0.707 | 0.800 | 0.700 |
| 292 | 0.908 | 0.793 | 0.701 | 0.801 | 0.701 |
| 293 | 0.905 | 0.798 | 0.698 | 0.801 | 0.701 |
| 294 | 0.919 | 0.809 | 0.728 | 0.819 | 0.728 |
| 295 | 0.908 | 0.798 | 0.737 | 0.814 | 0.721 |
| 296 | 0.925 | 0.752 | 0.725 | 0.799 | 0.699 |
| 297 | 0.922 | 0.773 | 0.728 | 0.807 | 0.710 |
| 298 | 0.922 | 0.793 | 0.749 | 0.821 | 0.731 |
| 299 | 0.910 | 0.773 | 0.737 | 0.806 | 0.709 |
| 300 | 0.925 | 0.773 | 0.701 | 0.799 | 0.699 |
| 301 | 0.931 | 0.780 | 0.704 | 0.805 | 0.707 |
| 302 | 0.905 | 0.760 | 0.719 | 0.794 | 0.691 |
| 303 | 0.913 | 0.744 | 0.722 | 0.792 | 0.688 |
| 304 | 0.913 | 0.798 | 0.719 | 0.811 | 0.715 |
| 305 | 0.905 | 0.778 | 0.737 | 0.806 | 0.709 |
| 306 | 0.934 | 0.757 | 0.722 | 0.803 | 0.705 |
| 307 | 0.931 | 0.770 | 0.719 | 0.806 | 0.709 |
| 308 | 0.905 | 0.757 | 0.740 | 0.799 | 0.699 |
| 309 | 0.908 | 0.775 | 0.719 | 0.800 | 0.700 |
| 310 | 0.899 | 0.775 | 0.719 | 0.798 | 0.696 |
| 311 | 0.925 | 0.786 | 0.689 | 0.800 | 0.700 |
| 312 | 0.908 | 0.775 | 0.772 | 0.817 | 0.726 |
| 313 | 0.910 | 0.801 | 0.731 | 0.814 | 0.721 |
| 314 | 0.910 | 0.767 | 0.743 | 0.806 | 0.709 |
| 315 | 0.925 | 0.809 | 0.728 | 0.821 | 0.731 |
| 316 | 0.916 | 0.755 | 0.701 | 0.790 | 0.685 |
| 317 | 0.913 | 0.804 | 0.728 | 0.815 | 0.722 |
| 318 | 0.922 | 0.791 | 0.728 | 0.813 | 0.720 |
| 319 | 0.939 | 0.778 | 0.704 | 0.807 | 0.710 |
| 320 | 0.896 | 0.788 | 0.746 | 0.810 | 0.714 |
| 321 | 0.902 | 0.778 | 0.707 | 0.796 | 0.693 |
| 322 | 0.916 | 0.793 | 0.704 | 0.805 | 0.707 |
| 323 | 0.902 | 0.793 | 0.749 | 0.814 | 0.721 |
| 324 | 0.922 | 0.798 | 0.713 | 0.812 | 0.717 |
| 325 | 0.925 | 0.780 | 0.719 | 0.808 | 0.711 |
| 326 | 0.916 | 0.798 | 0.731 | 0.815 | 0.722 |
| 327 | 0.916 | 0.780 | 0.725 | 0.807 | 0.710 |
| 328 | 0.916 | 0.791 | 0.751 | 0.819 | 0.728 |
| 329 | 0.922 | 0.788 | 0.695 | 0.802 | 0.703 |
| 330 | 0.925 | 0.801 | 0.716 | 0.814 | 0.721 |
| 331 | 0.896 | 0.775 | 0.740 | 0.803 | 0.704 |



|     |       |       |       |       |       |
|-----|-------|-------|-------|-------|-------|
| 332 | 0.913 | 0.736 | 0.734 | 0.793 | 0.690 |
| 333 | 0.922 | 0.765 | 0.719 | 0.801 | 0.702 |
| 334 | 0.910 | 0.752 | 0.734 | 0.798 | 0.696 |
| 335 | 0.931 | 0.770 | 0.722 | 0.807 | 0.710 |
| 336 | 0.910 | 0.783 | 0.746 | 0.813 | 0.719 |
| 337 | 0.905 | 0.770 | 0.710 | 0.795 | 0.692 |
| 338 | 0.916 | 0.773 | 0.722 | 0.803 | 0.704 |
| 339 | 0.922 | 0.770 | 0.737 | 0.809 | 0.713 |
| 340 | 0.925 | 0.793 | 0.734 | 0.817 | 0.725 |
| 341 | 0.916 | 0.783 | 0.710 | 0.803 | 0.704 |
| 342 | 0.928 | 0.762 | 0.710 | 0.799 | 0.699 |
| 343 | 0.913 | 0.755 | 0.743 | 0.802 | 0.704 |
| 344 | 0.919 | 0.783 | 0.746 | 0.815 | 0.723 |
| 345 | 0.902 | 0.773 | 0.719 | 0.798 | 0.696 |
| 346 | 0.931 | 0.783 | 0.710 | 0.808 | 0.711 |
| 347 | 0.934 | 0.765 | 0.719 | 0.805 | 0.707 |
| 348 | 0.908 | 0.775 | 0.728 | 0.803 | 0.705 |
| 349 | 0.919 | 0.755 | 0.704 | 0.792 | 0.687 |
| 350 | 0.922 | 0.791 | 0.722 | 0.812 | 0.717 |
| 351 | 0.936 | 0.778 | 0.719 | 0.811 | 0.715 |
| 352 | 0.896 | 0.729 | 0.734 | 0.784 | 0.678 |
| 353 | 0.913 | 0.749 | 0.707 | 0.789 | 0.683 |
| 354 | 0.916 | 0.747 | 0.725 | 0.795 | 0.692 |
| 355 | 0.908 | 0.760 | 0.713 | 0.793 | 0.689 |
| 356 | 0.931 | 0.804 | 0.710 | 0.815 | 0.722 |
| 357 | 0.916 | 0.783 | 0.707 | 0.802 | 0.703 |
| 358 | 0.925 | 0.788 | 0.728 | 0.813 | 0.720 |
| 359 | 0.899 | 0.770 | 0.725 | 0.798 | 0.696 |
| 360 | 0.905 | 0.783 | 0.763 | 0.816 | 0.725 |
| 361 | 0.919 | 0.793 | 0.746 | 0.819 | 0.728 |
| 362 | 0.910 | 0.801 | 0.719 | 0.811 | 0.715 |
| 363 | 0.913 | 0.765 | 0.731 | 0.802 | 0.703 |
| 364 | 0.902 | 0.773 | 0.716 | 0.797 | 0.695 |
| 365 | 0.919 | 0.783 | 0.740 | 0.813 | 0.720 |
| 366 | 0.916 | 0.793 | 0.665 | 0.793 | 0.689 |
| 367 | 0.919 | 0.770 | 0.740 | 0.809 | 0.713 |
| 368 | 0.931 | 0.780 | 0.704 | 0.805 | 0.707 |
| 369 | 0.910 | 0.749 | 0.713 | 0.790 | 0.685 |
| 370 | 0.908 | 0.791 | 0.725 | 0.808 | 0.711 |
| 371 | 0.899 | 0.760 | 0.698 | 0.785 | 0.678 |
| 372 | 0.913 | 0.773 | 0.728 | 0.804 | 0.706 |
| 373 | 0.905 | 0.788 | 0.749 | 0.813 | 0.720 |

|     |       |       |       |       |       |
|-----|-------|-------|-------|-------|-------|
| 374 | 0.942 | 0.778 | 0.784 | 0.833 | 0.750 |
| 375 | 0.919 | 0.773 | 0.731 | 0.807 | 0.710 |
| 376 | 0.910 | 0.804 | 0.749 | 0.821 | 0.731 |
| 377 | 0.905 | 0.778 | 0.722 | 0.801 | 0.702 |
| 378 | 0.928 | 0.791 | 0.722 | 0.813 | 0.720 |
| 379 | 0.910 | 0.775 | 0.701 | 0.796 | 0.693 |
| 380 | 0.928 | 0.770 | 0.695 | 0.798 | 0.696 |
| 381 | 0.882 | 0.796 | 0.749 | 0.809 | 0.713 |
| 382 | 0.896 | 0.788 | 0.692 | 0.793 | 0.689 |
| 383 | 0.922 | 0.798 | 0.716 | 0.813 | 0.718 |
| 384 | 0.908 | 0.775 | 0.707 | 0.797 | 0.694 |
| 385 | 0.916 | 0.765 | 0.725 | 0.801 | 0.702 |
| 386 | 0.922 | 0.780 | 0.749 | 0.816 | 0.724 |
| 387 | 0.916 | 0.796 | 0.710 | 0.808 | 0.711 |
| 388 | 0.919 | 0.814 | 0.743 | 0.826 | 0.738 |
| 389 | 0.925 | 0.780 | 0.722 | 0.809 | 0.713 |
| 390 | 0.913 | 0.801 | 0.701 | 0.806 | 0.708 |
| 391 | 0.899 | 0.806 | 0.743 | 0.816 | 0.724 |
| 392 | 0.902 | 0.806 | 0.743 | 0.817 | 0.725 |
| 393 | 0.902 | 0.775 | 0.743 | 0.806 | 0.709 |
| 394 | 0.919 | 0.788 | 0.734 | 0.813 | 0.720 |
| 395 | 0.928 | 0.780 | 0.713 | 0.807 | 0.710 |
| 396 | 0.905 | 0.817 | 0.737 | 0.820 | 0.730 |
| 397 | 0.916 | 0.786 | 0.713 | 0.805 | 0.707 |
| 398 | 0.905 | 0.780 | 0.713 | 0.799 | 0.699 |
| 399 | 0.919 | 0.824 | 0.728 | 0.825 | 0.737 |
| 400 | 0.902 | 0.788 | 0.710 | 0.800 | 0.700 |
| 401 | 0.919 | 0.783 | 0.725 | 0.809 | 0.713 |
| 402 | 0.910 | 0.755 | 0.749 | 0.803 | 0.705 |
| 403 | 0.922 | 0.819 | 0.749 | 0.830 | 0.745 |
| 404 | 0.899 | 0.780 | 0.757 | 0.812 | 0.717 |
| 405 | 0.905 | 0.817 | 0.763 | 0.828 | 0.742 |
| 406 | 0.908 | 0.783 | 0.713 | 0.801 | 0.701 |
| 407 | 0.905 | 0.804 | 0.728 | 0.813 | 0.718 |
| 408 | 0.893 | 0.791 | 0.731 | 0.805 | 0.707 |
| 409 | 0.910 | 0.780 | 0.734 | 0.808 | 0.711 |
| 410 | 0.902 | 0.773 | 0.749 | 0.807 | 0.711 |
| 411 | 0.902 | 0.770 | 0.701 | 0.791 | 0.686 |
| 412 | 0.908 | 0.780 | 0.749 | 0.812 | 0.717 |
| 413 | 0.913 | 0.806 | 0.734 | 0.818 | 0.727 |
| 414 | 0.896 | 0.770 | 0.760 | 0.808 | 0.712 |
| 415 | 0.893 | 0.791 | 0.743 | 0.809 | 0.713 |

|     |       |       |       |       |       |
|-----|-------|-------|-------|-------|-------|
| 416 | 0.916 | 0.804 | 0.746 | 0.822 | 0.732 |
| 417 | 0.916 | 0.804 | 0.740 | 0.820 | 0.730 |
| 418 | 0.913 | 0.806 | 0.766 | 0.828 | 0.743 |
| 419 | 0.910 | 0.806 | 0.728 | 0.815 | 0.722 |
| 420 | 0.919 | 0.749 | 0.746 | 0.803 | 0.705 |
| 421 | 0.899 | 0.806 | 0.719 | 0.809 | 0.713 |
| 422 | 0.908 | 0.786 | 0.731 | 0.808 | 0.712 |
| 423 | 0.913 | 0.809 | 0.737 | 0.820 | 0.729 |
| 424 | 0.913 | 0.791 | 0.751 | 0.818 | 0.727 |
| 425 | 0.890 | 0.796 | 0.728 | 0.805 | 0.707 |
| 426 | 0.919 | 0.775 | 0.719 | 0.804 | 0.706 |
| 427 | 0.893 | 0.819 | 0.740 | 0.818 | 0.727 |
| 428 | 0.925 | 0.827 | 0.734 | 0.829 | 0.744 |
| 429 | 0.908 | 0.775 | 0.751 | 0.811 | 0.716 |
| 430 | 0.879 | 0.775 | 0.746 | 0.799 | 0.699 |
| 431 | 0.896 | 0.770 | 0.716 | 0.794 | 0.690 |
| 432 | 0.913 | 0.798 | 0.740 | 0.817 | 0.725 |
| 433 | 0.939 | 0.791 | 0.751 | 0.827 | 0.740 |
| 434 | 0.905 | 0.786 | 0.725 | 0.805 | 0.707 |
| 435 | 0.905 | 0.791 | 0.701 | 0.799 | 0.698 |
| 436 | 0.899 | 0.814 | 0.722 | 0.813 | 0.718 |
| 437 | 0.922 | 0.791 | 0.737 | 0.816 | 0.724 |
| 438 | 0.910 | 0.793 | 0.731 | 0.812 | 0.717 |
| 439 | 0.913 | 0.804 | 0.713 | 0.811 | 0.715 |
| 440 | 0.896 | 0.778 | 0.766 | 0.813 | 0.719 |
| 441 | 0.896 | 0.806 | 0.740 | 0.814 | 0.721 |
| 442 | 0.908 | 0.786 | 0.722 | 0.805 | 0.707 |
| 443 | 0.910 | 0.783 | 0.754 | 0.815 | 0.723 |
| 444 | 0.899 | 0.796 | 0.731 | 0.809 | 0.713 |
| 445 | 0.910 | 0.765 | 0.766 | 0.813 | 0.719 |
| 446 | 0.905 | 0.791 | 0.737 | 0.811 | 0.716 |
| 447 | 0.905 | 0.819 | 0.725 | 0.817 | 0.725 |
| 448 | 0.908 | 0.786 | 0.757 | 0.816 | 0.724 |
| 449 | 0.905 | 0.806 | 0.743 | 0.818 | 0.727 |
| 450 | 0.922 | 0.765 | 0.734 | 0.806 | 0.709 |
| 451 | 0.922 | 0.801 | 0.743 | 0.822 | 0.732 |
| 452 | 0.890 | 0.786 | 0.746 | 0.807 | 0.710 |
| 453 | 0.896 | 0.804 | 0.725 | 0.809 | 0.713 |
| 454 | 0.896 | 0.811 | 0.763 | 0.824 | 0.735 |
| 455 | 0.934 | 0.786 | 0.757 | 0.825 | 0.737 |
| 456 | 0.910 | 0.814 | 0.719 | 0.815 | 0.722 |
| 457 | 0.905 | 0.804 | 0.731 | 0.813 | 0.720 |

|     |       |       |       |       |       |
|-----|-------|-------|-------|-------|-------|
| 458 | 0.922 | 0.765 | 0.769 | 0.817 | 0.726 |
| 459 | 0.913 | 0.786 | 0.740 | 0.813 | 0.718 |
| 460 | 0.916 | 0.801 | 0.766 | 0.828 | 0.741 |
| 461 | 0.913 | 0.811 | 0.716 | 0.814 | 0.721 |
| 462 | 0.905 | 0.804 | 0.740 | 0.816 | 0.724 |
| 463 | 0.908 | 0.804 | 0.728 | 0.813 | 0.720 |
| 464 | 0.919 | 0.809 | 0.725 | 0.818 | 0.727 |
| 465 | 0.899 | 0.809 | 0.722 | 0.811 | 0.715 |
| 466 | 0.899 | 0.783 | 0.719 | 0.800 | 0.700 |
| 467 | 0.890 | 0.804 | 0.734 | 0.810 | 0.714 |
| 468 | 0.916 | 0.780 | 0.760 | 0.818 | 0.727 |
| 469 | 0.908 | 0.811 | 0.763 | 0.828 | 0.741 |
| 470 | 0.905 | 0.770 | 0.734 | 0.802 | 0.703 |
| 471 | 0.908 | 0.796 | 0.701 | 0.802 | 0.703 |
| 472 | 0.910 | 0.721 | 0.707 | 0.778 | 0.667 |
| 473 | 0.905 | 0.770 | 0.754 | 0.809 | 0.713 |
| 474 | 0.919 | 0.775 | 0.722 | 0.805 | 0.707 |
| 475 | 0.928 | 0.796 | 0.728 | 0.817 | 0.725 |
| 476 | 0.890 | 0.742 | 0.716 | 0.782 | 0.673 |
| 477 | 0.899 | 0.796 | 0.731 | 0.809 | 0.713 |
| 478 | 0.890 | 0.775 | 0.763 | 0.809 | 0.714 |
| 479 | 0.905 | 0.786 | 0.728 | 0.806 | 0.708 |
| 480 | 0.913 | 0.798 | 0.772 | 0.828 | 0.741 |
| 481 | 0.910 | 0.778 | 0.754 | 0.813 | 0.720 |
| 482 | 0.910 | 0.755 | 0.746 | 0.802 | 0.704 |
| 483 | 0.908 | 0.801 | 0.760 | 0.823 | 0.734 |
| 484 | 0.905 | 0.778 | 0.728 | 0.803 | 0.704 |
| 485 | 0.922 | 0.757 | 0.766 | 0.813 | 0.721 |
| 486 | 0.913 | 0.798 | 0.728 | 0.813 | 0.720 |
| 487 | 0.922 | 0.804 | 0.754 | 0.827 | 0.740 |
| 488 | 0.899 | 0.806 | 0.734 | 0.813 | 0.720 |
| 489 | 0.910 | 0.778 | 0.757 | 0.814 | 0.722 |
| 490 | 0.913 | 0.829 | 0.731 | 0.826 | 0.738 |
| 491 | 0.902 | 0.783 | 0.731 | 0.805 | 0.707 |
| 492 | 0.931 | 0.793 | 0.728 | 0.817 | 0.725 |
| 493 | 0.925 | 0.773 | 0.713 | 0.803 | 0.704 |
| 494 | 0.913 | 0.819 | 0.772 | 0.835 | 0.752 |
| 495 | 0.908 | 0.786 | 0.722 | 0.805 | 0.707 |
| 496 | 0.910 | 0.770 | 0.710 | 0.797 | 0.695 |
| 497 | 0.913 | 0.757 | 0.734 | 0.800 | 0.701 |
| 498 | 0.919 | 0.780 | 0.757 | 0.818 | 0.727 |
| 499 | 0.913 | 0.770 | 0.760 | 0.813 | 0.721 |

|     |       |       |       |       |       |
|-----|-------|-------|-------|-------|-------|
| 500 | 0.910 | 0.786 | 0.722 | 0.806 | 0.709 |
| 501 | 0.910 | 0.783 | 0.778 | 0.823 | 0.735 |
| 502 | 0.916 | 0.767 | 0.731 | 0.804 | 0.706 |
| 503 | 0.922 | 0.786 | 0.737 | 0.814 | 0.721 |
| 504 | 0.905 | 0.801 | 0.746 | 0.817 | 0.725 |
| 505 | 0.916 | 0.783 | 0.731 | 0.810 | 0.714 |
| 506 | 0.902 | 0.752 | 0.716 | 0.789 | 0.684 |
| 507 | 0.916 | 0.783 | 0.716 | 0.805 | 0.707 |
| 508 | 0.905 | 0.775 | 0.754 | 0.811 | 0.716 |
| 509 | 0.922 | 0.804 | 0.728 | 0.818 | 0.727 |
| 510 | 0.896 | 0.793 | 0.749 | 0.813 | 0.718 |
| 511 | 0.902 | 0.762 | 0.740 | 0.800 | 0.701 |
| 512 | 0.908 | 0.778 | 0.698 | 0.795 | 0.692 |
| 513 | 0.905 | 0.796 | 0.722 | 0.808 | 0.711 |
| 514 | 0.931 | 0.762 | 0.751 | 0.813 | 0.720 |
| 515 | 0.905 | 0.801 | 0.743 | 0.816 | 0.724 |
| 516 | 0.905 | 0.767 | 0.713 | 0.795 | 0.692 |
| 517 | 0.908 | 0.775 | 0.746 | 0.809 | 0.713 |
| 518 | 0.908 | 0.770 | 0.728 | 0.801 | 0.702 |
| 519 | 0.916 | 0.765 | 0.719 | 0.799 | 0.699 |
| 520 | 0.910 | 0.773 | 0.683 | 0.789 | 0.683 |
| 521 | 0.902 | 0.778 | 0.704 | 0.795 | 0.692 |
| 522 | 0.910 | 0.773 | 0.725 | 0.802 | 0.703 |
| 523 | 0.905 | 0.752 | 0.701 | 0.785 | 0.678 |
| 524 | 0.913 | 0.773 | 0.731 | 0.805 | 0.707 |
| 525 | 0.896 | 0.757 | 0.695 | 0.783 | 0.673 |
| 526 | 0.899 | 0.770 | 0.746 | 0.804 | 0.706 |
| 527 | 0.913 | 0.773 | 0.731 | 0.805 | 0.707 |
| 528 | 0.913 | 0.801 | 0.728 | 0.814 | 0.721 |
| 529 | 0.905 | 0.760 | 0.737 | 0.799 | 0.699 |
| 530 | 0.908 | 0.767 | 0.743 | 0.805 | 0.707 |
| 531 | 0.908 | 0.783 | 0.725 | 0.805 | 0.707 |
| 532 | 0.919 | 0.793 | 0.731 | 0.814 | 0.721 |
| 533 | 0.934 | 0.783 | 0.716 | 0.811 | 0.716 |
| 534 | 0.905 | 0.806 | 0.757 | 0.823 | 0.734 |
| 535 | 0.919 | 0.796 | 0.710 | 0.809 | 0.713 |
| 536 | 0.913 | 0.767 | 0.713 | 0.798 | 0.696 |
| 537 | 0.925 | 0.767 | 0.731 | 0.807 | 0.710 |
| 538 | 0.908 | 0.729 | 0.710 | 0.781 | 0.671 |
| 539 | 0.902 | 0.793 | 0.722 | 0.806 | 0.708 |
| 540 | 0.916 | 0.780 | 0.766 | 0.820 | 0.730 |
| 541 | 0.919 | 0.783 | 0.731 | 0.811 | 0.716 |

|     |       |       |       |       |       |
|-----|-------|-------|-------|-------|-------|
| 542 | 0.916 | 0.778 | 0.695 | 0.797 | 0.694 |
| 543 | 0.908 | 0.773 | 0.754 | 0.811 | 0.716 |
| 544 | 0.910 | 0.747 | 0.704 | 0.786 | 0.679 |
| 545 | 0.908 | 0.760 | 0.728 | 0.798 | 0.696 |
| 546 | 0.908 | 0.747 | 0.766 | 0.805 | 0.709 |
| 547 | 0.916 | 0.783 | 0.704 | 0.801 | 0.701 |
| 548 | 0.919 | 0.775 | 0.725 | 0.806 | 0.709 |
| 549 | 0.913 | 0.796 | 0.716 | 0.809 | 0.713 |
| 550 | 0.910 | 0.778 | 0.740 | 0.809 | 0.713 |
| 551 | 0.899 | 0.801 | 0.760 | 0.820 | 0.730 |
| 552 | 0.916 | 0.798 | 0.734 | 0.816 | 0.724 |
| 553 | 0.913 | 0.778 | 0.754 | 0.814 | 0.722 |
| 554 | 0.919 | 0.778 | 0.716 | 0.804 | 0.706 |
| 555 | 0.908 | 0.788 | 0.728 | 0.808 | 0.711 |
| 556 | 0.919 | 0.801 | 0.749 | 0.823 | 0.734 |
| 557 | 0.910 | 0.780 | 0.766 | 0.818 | 0.727 |
| 558 | 0.905 | 0.811 | 0.734 | 0.817 | 0.725 |
| 559 | 0.916 | 0.775 | 0.725 | 0.805 | 0.707 |
| 560 | 0.925 | 0.793 | 0.749 | 0.822 | 0.733 |
| 561 | 0.910 | 0.780 | 0.704 | 0.799 | 0.697 |
| 562 | 0.910 | 0.788 | 0.704 | 0.801 | 0.701 |
| 563 | 0.902 | 0.775 | 0.722 | 0.799 | 0.699 |
| 564 | 0.893 | 0.775 | 0.719 | 0.796 | 0.693 |
| 565 | 0.908 | 0.765 | 0.701 | 0.791 | 0.686 |
| 566 | 0.922 | 0.783 | 0.710 | 0.805 | 0.707 |
| 567 | 0.913 | 0.796 | 0.734 | 0.814 | 0.721 |
| 568 | 0.919 | 0.796 | 0.707 | 0.808 | 0.711 |
| 569 | 0.902 | 0.806 | 0.722 | 0.811 | 0.715 |
| 570 | 0.902 | 0.811 | 0.734 | 0.816 | 0.724 |
| 571 | 0.922 | 0.793 | 0.704 | 0.807 | 0.710 |
| 572 | 0.908 | 0.770 | 0.740 | 0.805 | 0.708 |
| 573 | 0.902 | 0.783 | 0.740 | 0.808 | 0.712 |
| 574 | 0.913 | 0.809 | 0.704 | 0.810 | 0.714 |
| 575 | 0.902 | 0.773 | 0.743 | 0.805 | 0.708 |
| 576 | 0.928 | 0.791 | 0.722 | 0.813 | 0.720 |
| 577 | 0.922 | 0.796 | 0.713 | 0.811 | 0.715 |
| 578 | 0.922 | 0.757 | 0.716 | 0.798 | 0.696 |
| 579 | 0.910 | 0.767 | 0.707 | 0.795 | 0.692 |
| 580 | 0.905 | 0.757 | 0.719 | 0.793 | 0.689 |
| 581 | 0.899 | 0.747 | 0.695 | 0.780 | 0.669 |
| 582 | 0.908 | 0.798 | 0.707 | 0.805 | 0.707 |
| 583 | 0.913 | 0.796 | 0.731 | 0.813 | 0.720 |

|     |       |       |       |       |       |
|-----|-------|-------|-------|-------|-------|
| 584 | 0.913 | 0.773 | 0.728 | 0.804 | 0.706 |
| 585 | 0.905 | 0.780 | 0.737 | 0.807 | 0.710 |
| 586 | 0.919 | 0.788 | 0.746 | 0.817 | 0.726 |
| 587 | 0.899 | 0.809 | 0.734 | 0.814 | 0.721 |
| 588 | 0.908 | 0.755 | 0.701 | 0.787 | 0.681 |
| 589 | 0.925 | 0.793 | 0.707 | 0.809 | 0.713 |
| 590 | 0.908 | 0.780 | 0.731 | 0.806 | 0.709 |
| 591 | 0.916 | 0.775 | 0.686 | 0.793 | 0.689 |
| 592 | 0.905 | 0.793 | 0.737 | 0.812 | 0.717 |
| 593 | 0.905 | 0.809 | 0.775 | 0.829 | 0.744 |
| 594 | 0.922 | 0.796 | 0.728 | 0.815 | 0.723 |
| 595 | 0.931 | 0.780 | 0.725 | 0.812 | 0.717 |
| 596 | 0.913 | 0.804 | 0.728 | 0.815 | 0.722 |
| 597 | 0.919 | 0.786 | 0.731 | 0.812 | 0.717 |
| 598 | 0.916 | 0.778 | 0.728 | 0.807 | 0.710 |
| 599 | 0.919 | 0.770 | 0.760 | 0.815 | 0.723 |
| 600 | 0.908 | 0.770 | 0.743 | 0.806 | 0.709 |
| 601 | 0.902 | 0.786 | 0.763 | 0.816 | 0.724 |
| 602 | 0.905 | 0.793 | 0.692 | 0.798 | 0.696 |
| 603 | 0.913 | 0.786 | 0.769 | 0.822 | 0.733 |
| 604 | 0.916 | 0.788 | 0.737 | 0.813 | 0.720 |
| 605 | 0.905 | 0.775 | 0.698 | 0.793 | 0.689 |
| 606 | 0.902 | 0.791 | 0.740 | 0.811 | 0.716 |
| 607 | 0.916 | 0.765 | 0.701 | 0.794 | 0.690 |
| 608 | 0.913 | 0.783 | 0.716 | 0.804 | 0.706 |
| 609 | 0.908 | 0.765 | 0.713 | 0.795 | 0.692 |
| 610 | 0.908 | 0.793 | 0.740 | 0.813 | 0.720 |
| 611 | 0.916 | 0.762 | 0.734 | 0.803 | 0.705 |
| 612 | 0.910 | 0.762 | 0.754 | 0.808 | 0.712 |
| 613 | 0.910 | 0.780 | 0.722 | 0.804 | 0.706 |
| 614 | 0.902 | 0.786 | 0.737 | 0.808 | 0.711 |
| 615 | 0.896 | 0.783 | 0.710 | 0.797 | 0.694 |
| 616 | 0.908 | 0.791 | 0.737 | 0.812 | 0.717 |
| 617 | 0.916 | 0.767 | 0.728 | 0.803 | 0.705 |
| 618 | 0.902 | 0.796 | 0.743 | 0.813 | 0.720 |
| 619 | 0.910 | 0.793 | 0.719 | 0.808 | 0.711 |
| 620 | 0.902 | 0.749 | 0.734 | 0.794 | 0.691 |
| 621 | 0.908 | 0.788 | 0.743 | 0.813 | 0.718 |
| 622 | 0.913 | 0.775 | 0.731 | 0.806 | 0.709 |
| 623 | 0.908 | 0.801 | 0.737 | 0.815 | 0.722 |
| 624 | 0.922 | 0.788 | 0.734 | 0.814 | 0.721 |
| 625 | 0.916 | 0.767 | 0.686 | 0.790 | 0.684 |

|     |       |       |       |       |       |
|-----|-------|-------|-------|-------|-------|
| 626 | 0.919 | 0.778 | 0.740 | 0.812 | 0.717 |
| 627 | 0.905 | 0.780 | 0.734 | 0.806 | 0.709 |
| 628 | 0.910 | 0.778 | 0.740 | 0.809 | 0.713 |
| 629 | 0.910 | 0.806 | 0.710 | 0.810 | 0.714 |
| 630 | 0.905 | 0.798 | 0.740 | 0.814 | 0.721 |
| 631 | 0.905 | 0.767 | 0.746 | 0.805 | 0.708 |
| 632 | 0.908 | 0.791 | 0.725 | 0.808 | 0.711 |
| 633 | 0.925 | 0.783 | 0.749 | 0.818 | 0.727 |
| 634 | 0.908 | 0.786 | 0.722 | 0.805 | 0.707 |
| 635 | 0.905 | 0.762 | 0.728 | 0.798 | 0.696 |
| 636 | 0.908 | 0.788 | 0.728 | 0.808 | 0.711 |
| 637 | 0.931 | 0.752 | 0.737 | 0.805 | 0.708 |
| 638 | 0.910 | 0.786 | 0.689 | 0.796 | 0.693 |
| 639 | 0.905 | 0.775 | 0.740 | 0.806 | 0.709 |
| 640 | 0.928 | 0.793 | 0.722 | 0.814 | 0.721 |
| 641 | 0.936 | 0.762 | 0.710 | 0.802 | 0.703 |
| 642 | 0.925 | 0.762 | 0.766 | 0.816 | 0.725 |
| 643 | 0.905 | 0.773 | 0.722 | 0.799 | 0.699 |
| 644 | 0.913 | 0.809 | 0.740 | 0.821 | 0.731 |
| 645 | 0.928 | 0.778 | 0.725 | 0.810 | 0.714 |
| 646 | 0.919 | 0.817 | 0.698 | 0.813 | 0.718 |
| 647 | 0.899 | 0.778 | 0.737 | 0.804 | 0.706 |
| 648 | 0.905 | 0.778 | 0.737 | 0.806 | 0.709 |
| 649 | 0.913 | 0.778 | 0.710 | 0.800 | 0.700 |
| 650 | 0.928 | 0.798 | 0.701 | 0.810 | 0.714 |
| 651 | 0.916 | 0.814 | 0.728 | 0.820 | 0.730 |
| 652 | 0.902 | 0.760 | 0.737 | 0.799 | 0.698 |
| 653 | 0.916 | 0.773 | 0.737 | 0.808 | 0.711 |
| 654 | 0.908 | 0.811 | 0.716 | 0.813 | 0.718 |
| 655 | 0.905 | 0.798 | 0.707 | 0.804 | 0.705 |
| 656 | 0.913 | 0.798 | 0.766 | 0.826 | 0.739 |
| 657 | 0.908 | 0.783 | 0.722 | 0.804 | 0.706 |
| 658 | 0.902 | 0.804 | 0.760 | 0.822 | 0.733 |
| 659 | 0.890 | 0.806 | 0.737 | 0.812 | 0.717 |
| 660 | 0.899 | 0.793 | 0.716 | 0.803 | 0.704 |
| 661 | 0.913 | 0.786 | 0.731 | 0.810 | 0.714 |
| 662 | 0.913 | 0.798 | 0.740 | 0.817 | 0.725 |
| 663 | 0.910 | 0.762 | 0.743 | 0.804 | 0.706 |
| 664 | 0.913 | 0.780 | 0.734 | 0.809 | 0.713 |
| 665 | 0.899 | 0.798 | 0.749 | 0.815 | 0.723 |
| 666 | 0.919 | 0.775 | 0.725 | 0.806 | 0.709 |
| 667 | 0.916 | 0.804 | 0.710 | 0.811 | 0.715 |



|     |       |       |       |       |       |
|-----|-------|-------|-------|-------|-------|
| 668 | 0.908 | 0.822 | 0.695 | 0.810 | 0.714 |
| 669 | 0.934 | 0.788 | 0.704 | 0.809 | 0.713 |
| 670 | 0.905 | 0.791 | 0.716 | 0.804 | 0.706 |
| 671 | 0.902 | 0.791 | 0.737 | 0.810 | 0.714 |
| 672 | 0.916 | 0.780 | 0.731 | 0.809 | 0.713 |
| 673 | 0.910 | 0.809 | 0.716 | 0.813 | 0.718 |
| 674 | 0.916 | 0.798 | 0.754 | 0.823 | 0.734 |
| 675 | 0.899 | 0.798 | 0.692 | 0.798 | 0.696 |
| 676 | 0.896 | 0.780 | 0.722 | 0.799 | 0.699 |
| 677 | 0.916 | 0.806 | 0.719 | 0.814 | 0.721 |
| 678 | 0.899 | 0.791 | 0.740 | 0.810 | 0.715 |
| 679 | 0.913 | 0.786 | 0.734 | 0.811 | 0.716 |
| 680 | 0.922 | 0.786 | 0.719 | 0.809 | 0.713 |
| 681 | 0.910 | 0.788 | 0.751 | 0.816 | 0.724 |
| 682 | 0.931 | 0.801 | 0.740 | 0.824 | 0.735 |
| 683 | 0.913 | 0.762 | 0.725 | 0.799 | 0.699 |
| 684 | 0.899 | 0.824 | 0.737 | 0.821 | 0.731 |
| 685 | 0.905 | 0.773 | 0.713 | 0.797 | 0.695 |
| 686 | 0.902 | 0.767 | 0.719 | 0.796 | 0.693 |
| 687 | 0.902 | 0.760 | 0.749 | 0.802 | 0.704 |
| 688 | 0.916 | 0.773 | 0.749 | 0.812 | 0.717 |
| 689 | 0.899 | 0.809 | 0.716 | 0.809 | 0.713 |
| 690 | 0.908 | 0.806 | 0.749 | 0.821 | 0.731 |
| 691 | 0.902 | 0.775 | 0.689 | 0.789 | 0.683 |
| 692 | 0.916 | 0.770 | 0.731 | 0.805 | 0.707 |
| 693 | 0.902 | 0.793 | 0.719 | 0.805 | 0.707 |
| 694 | 0.887 | 0.817 | 0.713 | 0.807 | 0.710 |
| 695 | 0.902 | 0.762 | 0.695 | 0.786 | 0.679 |
| 696 | 0.913 | 0.775 | 0.728 | 0.805 | 0.707 |
| 697 | 0.890 | 0.798 | 0.719 | 0.803 | 0.704 |
| 698 | 0.919 | 0.822 | 0.754 | 0.832 | 0.748 |
| 699 | 0.908 | 0.811 | 0.734 | 0.818 | 0.727 |
| 700 | 0.916 | 0.726 | 0.722 | 0.786 | 0.680 |
| 701 | 0.934 | 0.798 | 0.740 | 0.824 | 0.735 |
| 702 | 0.908 | 0.744 | 0.695 | 0.782 | 0.672 |
| 703 | 0.928 | 0.819 | 0.725 | 0.825 | 0.737 |
| 704 | 0.902 | 0.791 | 0.740 | 0.811 | 0.716 |
| 705 | 0.910 | 0.788 | 0.737 | 0.812 | 0.717 |
| 706 | 0.922 | 0.796 | 0.734 | 0.817 | 0.725 |
| 707 | 0.925 | 0.783 | 0.710 | 0.806 | 0.708 |
| 708 | 0.922 | 0.804 | 0.722 | 0.816 | 0.724 |
| 709 | 0.908 | 0.796 | 0.731 | 0.812 | 0.717 |

|     |       |       |       |       |       |
|-----|-------|-------|-------|-------|-------|
| 710 | 0.910 | 0.775 | 0.719 | 0.801 | 0.701 |
| 711 | 0.925 | 0.747 | 0.671 | 0.781 | 0.671 |
| 712 | 0.908 | 0.824 | 0.704 | 0.813 | 0.720 |
| 713 | 0.910 | 0.822 | 0.707 | 0.814 | 0.721 |
| 714 | 0.905 | 0.798 | 0.713 | 0.806 | 0.708 |
| 715 | 0.910 | 0.767 | 0.749 | 0.808 | 0.712 |
| 716 | 0.916 | 0.773 | 0.728 | 0.805 | 0.708 |
| 717 | 0.902 | 0.734 | 0.695 | 0.776 | 0.664 |
| 718 | 0.919 | 0.749 | 0.722 | 0.796 | 0.693 |
| 719 | 0.902 | 0.788 | 0.737 | 0.809 | 0.713 |
| 720 | 0.896 | 0.778 | 0.731 | 0.801 | 0.702 |
| 721 | 0.922 | 0.783 | 0.704 | 0.803 | 0.704 |
| 722 | 0.913 | 0.786 | 0.740 | 0.813 | 0.719 |
| 723 | 0.902 | 0.786 | 0.737 | 0.808 | 0.711 |
| 724 | 0.905 | 0.767 | 0.731 | 0.800 | 0.700 |
| 725 | 0.905 | 0.780 | 0.719 | 0.801 | 0.701 |
| 726 | 0.908 | 0.760 | 0.743 | 0.802 | 0.703 |
| 727 | 0.893 | 0.780 | 0.716 | 0.797 | 0.695 |
| 728 | 0.899 | 0.778 | 0.731 | 0.802 | 0.703 |
| 729 | 0.910 | 0.765 | 0.713 | 0.796 | 0.693 |
| 730 | 0.893 | 0.804 | 0.695 | 0.799 | 0.697 |
| 731 | 0.905 | 0.796 | 0.757 | 0.819 | 0.728 |
| 732 | 0.908 | 0.765 | 0.749 | 0.806 | 0.709 |
| 733 | 0.910 | 0.752 | 0.731 | 0.797 | 0.695 |
| 734 | 0.908 | 0.749 | 0.737 | 0.797 | 0.695 |
| 735 | 0.922 | 0.798 | 0.734 | 0.818 | 0.727 |
| 736 | 0.913 | 0.786 | 0.760 | 0.819 | 0.729 |
| 737 | 0.908 | 0.747 | 0.731 | 0.794 | 0.691 |
| 738 | 0.913 | 0.814 | 0.725 | 0.818 | 0.727 |
| 739 | 0.919 | 0.793 | 0.751 | 0.821 | 0.731 |
| 740 | 0.902 | 0.780 | 0.734 | 0.805 | 0.707 |
| 741 | 0.919 | 0.765 | 0.728 | 0.803 | 0.704 |
| 742 | 0.922 | 0.762 | 0.763 | 0.814 | 0.722 |
| 743 | 0.902 | 0.806 | 0.743 | 0.817 | 0.726 |
| 744 | 0.922 | 0.773 | 0.716 | 0.803 | 0.704 |
| 745 | 0.919 | 0.793 | 0.728 | 0.813 | 0.720 |
| 746 | 0.919 | 0.806 | 0.740 | 0.822 | 0.732 |
| 747 | 0.916 | 0.798 | 0.766 | 0.827 | 0.740 |
| 748 | 0.925 | 0.739 | 0.734 | 0.798 | 0.697 |
| 749 | 0.916 | 0.778 | 0.719 | 0.804 | 0.706 |
| 750 | 0.919 | 0.767 | 0.731 | 0.805 | 0.707 |
| 751 | 0.910 | 0.814 | 0.725 | 0.817 | 0.725 |

|                            |           |             |          |            |            |
|----------------------------|-----------|-------------|----------|------------|------------|
| 752                        | 0.902     | 0.770       | 0.719    | 0.797      | 0.695      |
| 753                        | 0.931     | 0.801       | 0.731    | 0.821      | 0.731      |
| 754                        | 0.910     | 0.793       | 0.710    | 0.805      | 0.707      |
| 755                        | 0.925     | 0.793       | 0.728    | 0.815      | 0.722      |
| 756                        | 0.934     | 0.762       | 0.710    | 0.801      | 0.702      |
| 757                        | 0.899     | 0.755       | 0.713    | 0.788      | 0.682      |
| 758                        | 0.916     | 0.796       | 0.725    | 0.813      | 0.718      |
| 759                        | 0.902     | 0.809       | 0.772    | 0.828      | 0.741      |
| 760                        | 0.905     | 0.783       | 0.754    | 0.813      | 0.720      |
| 761                        | 0.936     | 0.806       | 0.749    | 0.830      | 0.745      |
| 762                        | 0.908     | 0.783       | 0.731    | 0.807      | 0.710      |
| 763                        | 0.905     | 0.786       | 0.749    | 0.813      | 0.719      |
| 764                        | 0.922     | 0.801       | 0.757    | 0.827      | 0.740      |
| 765                        | 0.919     | 0.773       | 0.737    | 0.809      | 0.713      |
| 766                        | 0.910     | 0.793       | 0.731    | 0.812      | 0.717      |
| 767                        | 0.919     | 0.786       | 0.701    | 0.802      | 0.703      |
| 768                        | 0.922     | 0.783       | 0.760    | 0.821      | 0.731      |
| 769                        | 0.908     | 0.778       | 0.754    | 0.813      | 0.719      |
| 770                        | 0.922     | 0.796       | 0.713    | 0.811      | 0.715      |
| 771                        | 0.905     | 0.798       | 0.719    | 0.808      | 0.711      |
| 772                        | 0.910     | 0.739       | 0.722    | 0.789      | 0.684      |
| 773                        | 0.922     | 0.806       | 0.746    | 0.825      | 0.737      |
| 774                        | 0.893     | 0.762       | 0.772    | 0.808      | 0.712      |
| 775                        | 0.925     | 0.793       | 0.749    | 0.822      | 0.733      |
| 776                        | 0.919     | 0.796       | 0.754    | 0.823      | 0.734      |
| 777                        | 0.905     | 0.786       | 0.728    | 0.806      | 0.709      |
| 778                        | 0.922     | 0.811       | 0.740    | 0.825      | 0.737      |
| 779                        | 0.925     | 0.798       | 0.716    | 0.813      | 0.720      |
| 780                        | 0.905     | 0.783       | 0.734    | 0.807      | 0.710      |
| 781                        | 0.910     | 0.783       | 0.713    | 0.802      | 0.703      |
| 782                        | 0.902     | 0.742       | 0.737    | 0.792      | 0.688      |
| 783                        | 0.928     | 0.793       | 0.731    | 0.817      | 0.725      |
| 784                        | 0.902     | 0.786       | 0.751    | 0.813      | 0.719      |
| 785                        | 0.899     | 0.788       | 0.749    | 0.812      | 0.717      |
| 786                        | 0.910     | 0.749       | 0.722    | 0.793      | 0.689      |
| 787                        | 0.913     | 0.811       | 0.731    | 0.819      | 0.728      |
| 788                        | 0.913     | 0.770       | 0.737    | 0.806      | 0.709      |
| <b>MCFS</b>                |           |             |          |            |            |
| <b>Numbers of features</b> | <b>G1</b> | <b>G2/M</b> | <b>S</b> | <b>ACC</b> | <b>MCC</b> |
| 1                          | 0.919     | 0.654       | 0.560    | 0.710      | 0.565      |
| 2                          | 0.916     | 0.700       | 0.593    | 0.737      | 0.604      |
| 3                          | 0.948     | 0.703       | 0.653    | 0.767      | 0.650      |

|    |       |       |       |       |       |
|----|-------|-------|-------|-------|-------|
| 4  | 0.934 | 0.698 | 0.641 | 0.756 | 0.634 |
| 5  | 0.951 | 0.726 | 0.695 | 0.789 | 0.684 |
| 6  | 0.934 | 0.726 | 0.674 | 0.777 | 0.665 |
| 7  | 0.931 | 0.736 | 0.662 | 0.776 | 0.663 |
| 8  | 0.936 | 0.716 | 0.680 | 0.776 | 0.664 |
| 9  | 0.951 | 0.736 | 0.689 | 0.791 | 0.686 |
| 10 | 0.934 | 0.718 | 0.701 | 0.783 | 0.674 |
| 11 | 0.922 | 0.736 | 0.728 | 0.794 | 0.691 |
| 12 | 0.925 | 0.744 | 0.740 | 0.801 | 0.702 |
| 13 | 0.916 | 0.752 | 0.731 | 0.799 | 0.698 |
| 14 | 0.934 | 0.739 | 0.686 | 0.785 | 0.677 |
| 15 | 0.928 | 0.760 | 0.704 | 0.797 | 0.694 |
| 16 | 0.928 | 0.757 | 0.740 | 0.807 | 0.710 |
| 17 | 0.896 | 0.791 | 0.763 | 0.816 | 0.725 |
| 18 | 0.925 | 0.783 | 0.763 | 0.823 | 0.734 |
| 19 | 0.919 | 0.770 | 0.749 | 0.812 | 0.717 |
| 20 | 0.925 | 0.747 | 0.757 | 0.808 | 0.712 |
| 21 | 0.919 | 0.786 | 0.749 | 0.817 | 0.726 |
| 22 | 0.919 | 0.778 | 0.722 | 0.806 | 0.709 |
| 23 | 0.925 | 0.762 | 0.740 | 0.808 | 0.712 |
| 24 | 0.934 | 0.780 | 0.754 | 0.822 | 0.733 |
| 25 | 0.925 | 0.760 | 0.731 | 0.804 | 0.706 |
| 26 | 0.916 | 0.767 | 0.725 | 0.802 | 0.703 |
| 27 | 0.908 | 0.744 | 0.716 | 0.788 | 0.682 |
| 28 | 0.910 | 0.742 | 0.710 | 0.786 | 0.679 |
| 29 | 0.913 | 0.793 | 0.749 | 0.818 | 0.727 |
| 30 | 0.922 | 0.775 | 0.719 | 0.805 | 0.707 |
| 31 | 0.916 | 0.775 | 0.734 | 0.808 | 0.711 |
| 32 | 0.910 | 0.775 | 0.766 | 0.816 | 0.724 |
| 33 | 0.928 | 0.770 | 0.754 | 0.816 | 0.724 |
| 34 | 0.902 | 0.819 | 0.781 | 0.834 | 0.751 |
| 35 | 0.919 | 0.796 | 0.740 | 0.818 | 0.727 |
| 36 | 0.916 | 0.747 | 0.751 | 0.803 | 0.705 |
| 37 | 0.919 | 0.765 | 0.737 | 0.806 | 0.709 |
| 38 | 0.916 | 0.767 | 0.778 | 0.819 | 0.729 |
| 39 | 0.928 | 0.788 | 0.725 | 0.813 | 0.720 |
| 40 | 0.919 | 0.757 | 0.740 | 0.804 | 0.706 |
| 41 | 0.913 | 0.780 | 0.731 | 0.808 | 0.711 |
| 42 | 0.922 | 0.749 | 0.719 | 0.796 | 0.693 |
| 43 | 0.925 | 0.806 | 0.731 | 0.821 | 0.731 |
| 44 | 0.919 | 0.767 | 0.757 | 0.813 | 0.720 |
| 45 | 0.913 | 0.780 | 0.757 | 0.816 | 0.724 |

|    |       |       |       |       |       |
|----|-------|-------|-------|-------|-------|
| 46 | 0.931 | 0.742 | 0.787 | 0.817 | 0.727 |
| 47 | 0.913 | 0.788 | 0.763 | 0.821 | 0.732 |
| 48 | 0.922 | 0.762 | 0.746 | 0.809 | 0.713 |
| 49 | 0.934 | 0.798 | 0.734 | 0.822 | 0.732 |
| 50 | 0.942 | 0.791 | 0.743 | 0.825 | 0.737 |
| 51 | 0.939 | 0.793 | 0.769 | 0.833 | 0.750 |
| 52 | 0.910 | 0.786 | 0.757 | 0.817 | 0.726 |
| 53 | 0.896 | 0.778 | 0.734 | 0.802 | 0.703 |
| 54 | 0.934 | 0.793 | 0.772 | 0.832 | 0.748 |
| 55 | 0.922 | 0.762 | 0.746 | 0.809 | 0.713 |
| 56 | 0.916 | 0.796 | 0.760 | 0.824 | 0.736 |
| 57 | 0.919 | 0.793 | 0.737 | 0.816 | 0.724 |
| 58 | 0.925 | 0.786 | 0.740 | 0.816 | 0.724 |
| 59 | 0.919 | 0.793 | 0.743 | 0.818 | 0.727 |
| 60 | 0.913 | 0.765 | 0.737 | 0.804 | 0.706 |
| 61 | 0.925 | 0.798 | 0.757 | 0.827 | 0.740 |
| 62 | 0.931 | 0.767 | 0.728 | 0.808 | 0.712 |
| 63 | 0.913 | 0.804 | 0.751 | 0.823 | 0.734 |
| 64 | 0.905 | 0.786 | 0.769 | 0.819 | 0.729 |
| 65 | 0.925 | 0.814 | 0.734 | 0.825 | 0.737 |
| 66 | 0.922 | 0.767 | 0.754 | 0.813 | 0.721 |
| 67 | 0.905 | 0.791 | 0.746 | 0.813 | 0.720 |
| 68 | 0.902 | 0.798 | 0.757 | 0.819 | 0.728 |
| 69 | 0.916 | 0.770 | 0.763 | 0.815 | 0.723 |
| 70 | 0.916 | 0.806 | 0.778 | 0.833 | 0.750 |
| 71 | 0.913 | 0.796 | 0.740 | 0.816 | 0.724 |
| 72 | 0.902 | 0.778 | 0.749 | 0.809 | 0.713 |
| 73 | 0.942 | 0.786 | 0.740 | 0.822 | 0.733 |
| 74 | 0.934 | 0.793 | 0.751 | 0.826 | 0.738 |
| 75 | 0.916 | 0.811 | 0.751 | 0.827 | 0.739 |
| 76 | 0.908 | 0.775 | 0.769 | 0.816 | 0.725 |
| 77 | 0.919 | 0.798 | 0.734 | 0.817 | 0.725 |
| 78 | 0.916 | 0.770 | 0.737 | 0.807 | 0.710 |
| 79 | 0.905 | 0.824 | 0.716 | 0.816 | 0.724 |
| 80 | 0.916 | 0.780 | 0.757 | 0.817 | 0.726 |
| 81 | 0.916 | 0.773 | 0.790 | 0.825 | 0.738 |
| 82 | 0.910 | 0.775 | 0.746 | 0.810 | 0.715 |
| 83 | 0.896 | 0.775 | 0.737 | 0.802 | 0.703 |
| 84 | 0.913 | 0.755 | 0.734 | 0.799 | 0.699 |
| 85 | 0.913 | 0.773 | 0.754 | 0.813 | 0.719 |
| 86 | 0.908 | 0.760 | 0.766 | 0.810 | 0.715 |
| 87 | 0.916 | 0.786 | 0.757 | 0.819 | 0.728 |

|     |       |       |       |       |       |
|-----|-------|-------|-------|-------|-------|
| 88  | 0.919 | 0.788 | 0.751 | 0.819 | 0.728 |
| 89  | 0.902 | 0.798 | 0.737 | 0.813 | 0.718 |
| 90  | 0.902 | 0.765 | 0.737 | 0.800 | 0.701 |
| 91  | 0.928 | 0.767 | 0.725 | 0.806 | 0.709 |
| 92  | 0.919 | 0.780 | 0.701 | 0.800 | 0.700 |
| 93  | 0.905 | 0.755 | 0.740 | 0.799 | 0.698 |
| 94  | 0.908 | 0.780 | 0.746 | 0.811 | 0.716 |
| 95  | 0.910 | 0.793 | 0.751 | 0.818 | 0.727 |
| 96  | 0.913 | 0.780 | 0.746 | 0.813 | 0.719 |
| 97  | 0.902 | 0.793 | 0.740 | 0.812 | 0.717 |
| 98  | 0.934 | 0.796 | 0.751 | 0.827 | 0.740 |
| 99  | 0.936 | 0.786 | 0.769 | 0.829 | 0.744 |
| 100 | 0.919 | 0.780 | 0.749 | 0.815 | 0.723 |
| 101 | 0.893 | 0.780 | 0.710 | 0.795 | 0.692 |
| 102 | 0.939 | 0.778 | 0.713 | 0.810 | 0.714 |
| 103 | 0.919 | 0.786 | 0.775 | 0.826 | 0.739 |
| 104 | 0.899 | 0.765 | 0.751 | 0.804 | 0.707 |
| 105 | 0.928 | 0.775 | 0.746 | 0.815 | 0.723 |
| 106 | 0.919 | 0.801 | 0.749 | 0.823 | 0.734 |
| 107 | 0.916 | 0.749 | 0.713 | 0.792 | 0.688 |
| 108 | 0.916 | 0.780 | 0.740 | 0.812 | 0.717 |
| 109 | 0.896 | 0.796 | 0.754 | 0.815 | 0.723 |
| 110 | 0.931 | 0.778 | 0.746 | 0.817 | 0.726 |
| 111 | 0.916 | 0.780 | 0.731 | 0.809 | 0.713 |
| 112 | 0.939 | 0.788 | 0.743 | 0.823 | 0.734 |
| 113 | 0.908 | 0.804 | 0.713 | 0.809 | 0.713 |
| 114 | 0.919 | 0.760 | 0.749 | 0.808 | 0.712 |
| 115 | 0.893 | 0.747 | 0.737 | 0.791 | 0.687 |
| 116 | 0.890 | 0.752 | 0.743 | 0.794 | 0.691 |
| 117 | 0.902 | 0.755 | 0.737 | 0.797 | 0.695 |
| 118 | 0.922 | 0.757 | 0.760 | 0.812 | 0.718 |
| 119 | 0.931 | 0.798 | 0.754 | 0.828 | 0.741 |
| 120 | 0.934 | 0.778 | 0.734 | 0.814 | 0.721 |
| 121 | 0.919 | 0.765 | 0.728 | 0.803 | 0.705 |
| 122 | 0.925 | 0.770 | 0.754 | 0.815 | 0.723 |
| 123 | 0.908 | 0.736 | 0.763 | 0.800 | 0.702 |
| 124 | 0.934 | 0.773 | 0.749 | 0.817 | 0.726 |
| 125 | 0.905 | 0.767 | 0.751 | 0.807 | 0.711 |
| 126 | 0.905 | 0.791 | 0.754 | 0.816 | 0.724 |
| 127 | 0.934 | 0.729 | 0.740 | 0.799 | 0.698 |
| 128 | 0.916 | 0.770 | 0.760 | 0.814 | 0.722 |
| 129 | 0.893 | 0.752 | 0.754 | 0.799 | 0.698 |

|     |       |       |       |       |       |
|-----|-------|-------|-------|-------|-------|
| 130 | 0.925 | 0.760 | 0.728 | 0.803 | 0.705 |
| 131 | 0.896 | 0.752 | 0.716 | 0.787 | 0.681 |
| 132 | 0.928 | 0.765 | 0.763 | 0.817 | 0.726 |
| 133 | 0.925 | 0.788 | 0.704 | 0.806 | 0.708 |
| 134 | 0.919 | 0.747 | 0.775 | 0.812 | 0.719 |
| 135 | 0.910 | 0.762 | 0.763 | 0.811 | 0.716 |
| 136 | 0.910 | 0.760 | 0.769 | 0.812 | 0.718 |
| 137 | 0.925 | 0.778 | 0.751 | 0.817 | 0.726 |
| 138 | 0.916 | 0.765 | 0.725 | 0.801 | 0.702 |
| 139 | 0.922 | 0.773 | 0.740 | 0.811 | 0.716 |
| 140 | 0.925 | 0.786 | 0.737 | 0.815 | 0.723 |
| 141 | 0.934 | 0.760 | 0.722 | 0.804 | 0.706 |
| 142 | 0.922 | 0.755 | 0.740 | 0.804 | 0.706 |
| 143 | 0.890 | 0.721 | 0.707 | 0.771 | 0.657 |
| 144 | 0.931 | 0.749 | 0.749 | 0.808 | 0.712 |
| 145 | 0.925 | 0.778 | 0.728 | 0.810 | 0.714 |
| 146 | 0.913 | 0.755 | 0.737 | 0.800 | 0.700 |
| 147 | 0.910 | 0.749 | 0.728 | 0.795 | 0.692 |
| 148 | 0.893 | 0.796 | 0.754 | 0.814 | 0.721 |
| 149 | 0.910 | 0.780 | 0.743 | 0.811 | 0.716 |
| 150 | 0.919 | 0.773 | 0.728 | 0.806 | 0.709 |
| 151 | 0.916 | 0.762 | 0.719 | 0.799 | 0.697 |
| 152 | 0.922 | 0.775 | 0.746 | 0.813 | 0.720 |
| 153 | 0.908 | 0.780 | 0.737 | 0.808 | 0.712 |
| 154 | 0.931 | 0.757 | 0.740 | 0.808 | 0.712 |
| 155 | 0.928 | 0.755 | 0.749 | 0.809 | 0.714 |
| 156 | 0.916 | 0.749 | 0.728 | 0.797 | 0.695 |
| 157 | 0.902 | 0.770 | 0.740 | 0.803 | 0.705 |
| 158 | 0.939 | 0.755 | 0.754 | 0.814 | 0.722 |
| 159 | 0.922 | 0.773 | 0.746 | 0.813 | 0.719 |
| 160 | 0.916 | 0.791 | 0.707 | 0.805 | 0.707 |
| 161 | 0.902 | 0.786 | 0.746 | 0.811 | 0.716 |
| 162 | 0.908 | 0.773 | 0.746 | 0.808 | 0.712 |
| 163 | 0.910 | 0.762 | 0.710 | 0.794 | 0.690 |
| 164 | 0.916 | 0.798 | 0.737 | 0.817 | 0.725 |
| 165 | 0.916 | 0.752 | 0.728 | 0.798 | 0.696 |
| 166 | 0.931 | 0.767 | 0.737 | 0.811 | 0.716 |
| 167 | 0.922 | 0.786 | 0.707 | 0.805 | 0.707 |
| 168 | 0.916 | 0.770 | 0.722 | 0.802 | 0.703 |
| 169 | 0.910 | 0.775 | 0.734 | 0.806 | 0.709 |
| 170 | 0.925 | 0.783 | 0.737 | 0.814 | 0.721 |
| 171 | 0.925 | 0.793 | 0.716 | 0.812 | 0.717 |

|     |       |       |       |       |       |
|-----|-------|-------|-------|-------|-------|
| 172 | 0.908 | 0.806 | 0.716 | 0.811 | 0.715 |
| 173 | 0.931 | 0.775 | 0.760 | 0.821 | 0.732 |
| 174 | 0.896 | 0.780 | 0.737 | 0.804 | 0.706 |
| 175 | 0.922 | 0.773 | 0.716 | 0.803 | 0.704 |
| 176 | 0.905 | 0.767 | 0.734 | 0.801 | 0.702 |
| 177 | 0.928 | 0.760 | 0.722 | 0.802 | 0.703 |
| 178 | 0.908 | 0.770 | 0.719 | 0.799 | 0.697 |
| 179 | 0.913 | 0.770 | 0.701 | 0.795 | 0.691 |
| 180 | 0.913 | 0.726 | 0.701 | 0.779 | 0.668 |
| 181 | 0.913 | 0.783 | 0.698 | 0.799 | 0.697 |
| 182 | 0.928 | 0.757 | 0.743 | 0.808 | 0.712 |
| 183 | 0.928 | 0.780 | 0.707 | 0.805 | 0.707 |
| 184 | 0.913 | 0.755 | 0.728 | 0.798 | 0.697 |
| 185 | 0.939 | 0.822 | 0.731 | 0.831 | 0.746 |
| 186 | 0.910 | 0.793 | 0.734 | 0.813 | 0.718 |
| 187 | 0.905 | 0.765 | 0.737 | 0.801 | 0.702 |
| 188 | 0.910 | 0.778 | 0.746 | 0.811 | 0.716 |
| 189 | 0.936 | 0.798 | 0.757 | 0.830 | 0.745 |
| 190 | 0.916 | 0.837 | 0.698 | 0.819 | 0.728 |
| 191 | 0.908 | 0.780 | 0.722 | 0.803 | 0.704 |
| 192 | 0.919 | 0.786 | 0.743 | 0.815 | 0.723 |
| 193 | 0.925 | 0.773 | 0.734 | 0.810 | 0.714 |
| 194 | 0.913 | 0.788 | 0.746 | 0.815 | 0.723 |
| 195 | 0.905 | 0.806 | 0.734 | 0.815 | 0.723 |
| 196 | 0.908 | 0.775 | 0.743 | 0.808 | 0.712 |
| 197 | 0.916 | 0.762 | 0.743 | 0.806 | 0.709 |
| 198 | 0.916 | 0.809 | 0.743 | 0.823 | 0.734 |
| 199 | 0.922 | 0.791 | 0.746 | 0.819 | 0.728 |
| 200 | 0.931 | 0.798 | 0.763 | 0.830 | 0.745 |
| 201 | 0.916 | 0.773 | 0.781 | 0.822 | 0.734 |
| 202 | 0.913 | 0.811 | 0.751 | 0.826 | 0.738 |
| 203 | 0.910 | 0.798 | 0.740 | 0.816 | 0.724 |
| 204 | 0.916 | 0.791 | 0.751 | 0.819 | 0.729 |
| 205 | 0.925 | 0.793 | 0.751 | 0.823 | 0.734 |
| 206 | 0.919 | 0.809 | 0.731 | 0.820 | 0.730 |
| 207 | 0.910 | 0.801 | 0.757 | 0.823 | 0.734 |
| 208 | 0.908 | 0.798 | 0.731 | 0.813 | 0.718 |
| 209 | 0.913 | 0.752 | 0.749 | 0.803 | 0.705 |
| 210 | 0.934 | 0.783 | 0.746 | 0.820 | 0.730 |
| 211 | 0.919 | 0.783 | 0.772 | 0.824 | 0.736 |
| 212 | 0.896 | 0.791 | 0.734 | 0.807 | 0.710 |
| 213 | 0.919 | 0.755 | 0.757 | 0.809 | 0.714 |



|     |       |       |       |       |       |
|-----|-------|-------|-------|-------|-------|
| 214 | 0.910 | 0.786 | 0.737 | 0.811 | 0.716 |
| 215 | 0.922 | 0.765 | 0.746 | 0.810 | 0.715 |
| 216 | 0.928 | 0.798 | 0.734 | 0.820 | 0.730 |
| 217 | 0.922 | 0.806 | 0.743 | 0.824 | 0.735 |
| 218 | 0.913 | 0.762 | 0.740 | 0.804 | 0.706 |
| 219 | 0.908 | 0.796 | 0.760 | 0.821 | 0.731 |
| 220 | 0.916 | 0.796 | 0.740 | 0.817 | 0.725 |
| 221 | 0.913 | 0.786 | 0.722 | 0.807 | 0.710 |
| 222 | 0.905 | 0.778 | 0.716 | 0.799 | 0.699 |
| 223 | 0.922 | 0.783 | 0.743 | 0.815 | 0.723 |
| 224 | 0.919 | 0.796 | 0.737 | 0.817 | 0.725 |
| 225 | 0.919 | 0.770 | 0.751 | 0.813 | 0.719 |
| 226 | 0.910 | 0.804 | 0.757 | 0.824 | 0.735 |
| 227 | 0.910 | 0.765 | 0.749 | 0.807 | 0.710 |
| 228 | 0.910 | 0.770 | 0.743 | 0.807 | 0.711 |
| 229 | 0.922 | 0.801 | 0.749 | 0.824 | 0.735 |
| 230 | 0.936 | 0.760 | 0.746 | 0.813 | 0.719 |
| 231 | 0.931 | 0.796 | 0.769 | 0.831 | 0.747 |
| 232 | 0.910 | 0.780 | 0.728 | 0.806 | 0.709 |
| 233 | 0.913 | 0.788 | 0.740 | 0.813 | 0.720 |
| 234 | 0.913 | 0.811 | 0.743 | 0.823 | 0.734 |
| 235 | 0.899 | 0.788 | 0.725 | 0.804 | 0.706 |
| 236 | 0.902 | 0.798 | 0.737 | 0.813 | 0.718 |
| 237 | 0.908 | 0.783 | 0.746 | 0.812 | 0.717 |
| 238 | 0.908 | 0.757 | 0.763 | 0.808 | 0.713 |
| 239 | 0.910 | 0.801 | 0.740 | 0.817 | 0.725 |
| 240 | 0.916 | 0.780 | 0.725 | 0.807 | 0.710 |
| 241 | 0.908 | 0.793 | 0.737 | 0.813 | 0.718 |
| 242 | 0.922 | 0.767 | 0.749 | 0.812 | 0.718 |
| 243 | 0.916 | 0.788 | 0.746 | 0.816 | 0.724 |
| 244 | 0.925 | 0.760 | 0.743 | 0.808 | 0.712 |
| 245 | 0.922 | 0.791 | 0.746 | 0.819 | 0.728 |
| 246 | 0.919 | 0.767 | 0.754 | 0.813 | 0.719 |
| 247 | 0.913 | 0.796 | 0.716 | 0.809 | 0.713 |
| 248 | 0.913 | 0.760 | 0.757 | 0.809 | 0.714 |
| 249 | 0.913 | 0.822 | 0.725 | 0.821 | 0.731 |
| 250 | 0.925 | 0.791 | 0.749 | 0.821 | 0.731 |
| 251 | 0.925 | 0.773 | 0.716 | 0.804 | 0.706 |
| 252 | 0.893 | 0.773 | 0.722 | 0.796 | 0.693 |
| 253 | 0.936 | 0.796 | 0.725 | 0.819 | 0.728 |
| 254 | 0.910 | 0.767 | 0.754 | 0.810 | 0.715 |
| 255 | 0.916 | 0.749 | 0.728 | 0.797 | 0.695 |

|     |       |       |       |       |       |
|-----|-------|-------|-------|-------|-------|
| 256 | 0.908 | 0.788 | 0.722 | 0.806 | 0.709 |
| 257 | 0.902 | 0.773 | 0.757 | 0.810 | 0.715 |
| 258 | 0.908 | 0.791 | 0.746 | 0.814 | 0.721 |
| 259 | 0.913 | 0.786 | 0.731 | 0.810 | 0.714 |
| 260 | 0.908 | 0.770 | 0.760 | 0.812 | 0.718 |
| 261 | 0.910 | 0.770 | 0.772 | 0.816 | 0.725 |
| 262 | 0.910 | 0.806 | 0.751 | 0.823 | 0.734 |
| 263 | 0.899 | 0.809 | 0.751 | 0.820 | 0.730 |
| 264 | 0.931 | 0.760 | 0.746 | 0.811 | 0.716 |
| 265 | 0.916 | 0.798 | 0.734 | 0.816 | 0.724 |
| 266 | 0.922 | 0.780 | 0.754 | 0.818 | 0.727 |
| 267 | 0.936 | 0.796 | 0.731 | 0.821 | 0.731 |
| 268 | 0.919 | 0.791 | 0.757 | 0.822 | 0.733 |
| 269 | 0.902 | 0.788 | 0.692 | 0.795 | 0.691 |
| 270 | 0.913 | 0.775 | 0.707 | 0.799 | 0.697 |
| 271 | 0.916 | 0.770 | 0.746 | 0.810 | 0.715 |
| 272 | 0.919 | 0.786 | 0.757 | 0.820 | 0.730 |
| 273 | 0.931 | 0.775 | 0.749 | 0.817 | 0.726 |
| 274 | 0.910 | 0.796 | 0.704 | 0.804 | 0.706 |
| 275 | 0.925 | 0.811 | 0.763 | 0.833 | 0.749 |
| 276 | 0.916 | 0.786 | 0.763 | 0.821 | 0.732 |
| 277 | 0.902 | 0.814 | 0.737 | 0.818 | 0.727 |
| 278 | 0.919 | 0.801 | 0.728 | 0.816 | 0.724 |
| 279 | 0.905 | 0.806 | 0.763 | 0.825 | 0.737 |
| 280 | 0.928 | 0.780 | 0.760 | 0.822 | 0.733 |
| 281 | 0.922 | 0.829 | 0.734 | 0.829 | 0.744 |
| 282 | 0.905 | 0.788 | 0.754 | 0.815 | 0.723 |
| 283 | 0.913 | 0.770 | 0.749 | 0.810 | 0.715 |
| 284 | 0.899 | 0.801 | 0.731 | 0.811 | 0.716 |
| 285 | 0.919 | 0.786 | 0.713 | 0.806 | 0.708 |
| 286 | 0.908 | 0.770 | 0.746 | 0.807 | 0.711 |
| 287 | 0.905 | 0.788 | 0.707 | 0.800 | 0.700 |
| 288 | 0.887 | 0.773 | 0.763 | 0.807 | 0.711 |
| 289 | 0.913 | 0.786 | 0.775 | 0.824 | 0.736 |
| 290 | 0.893 | 0.822 | 0.716 | 0.812 | 0.717 |
| 291 | 0.887 | 0.783 | 0.740 | 0.803 | 0.705 |
| 292 | 0.919 | 0.791 | 0.754 | 0.821 | 0.731 |
| 293 | 0.899 | 0.791 | 0.746 | 0.812 | 0.717 |
| 294 | 0.922 | 0.775 | 0.731 | 0.809 | 0.713 |
| 295 | 0.916 | 0.780 | 0.766 | 0.820 | 0.730 |
| 296 | 0.902 | 0.811 | 0.731 | 0.815 | 0.723 |
| 297 | 0.928 | 0.767 | 0.734 | 0.809 | 0.713 |

|     |       |       |       |       |       |
|-----|-------|-------|-------|-------|-------|
| 298 | 0.913 | 0.804 | 0.734 | 0.817 | 0.725 |
| 299 | 0.928 | 0.804 | 0.754 | 0.828 | 0.742 |
| 300 | 0.913 | 0.822 | 0.778 | 0.838 | 0.756 |
| 301 | 0.922 | 0.804 | 0.766 | 0.830 | 0.745 |
| 302 | 0.916 | 0.806 | 0.734 | 0.819 | 0.728 |
| 303 | 0.919 | 0.822 | 0.719 | 0.821 | 0.731 |
| 304 | 0.905 | 0.755 | 0.731 | 0.796 | 0.694 |
| 305 | 0.896 | 0.819 | 0.734 | 0.817 | 0.725 |
| 306 | 0.913 | 0.783 | 0.728 | 0.808 | 0.711 |
| 307 | 0.887 | 0.796 | 0.772 | 0.818 | 0.727 |
| 308 | 0.913 | 0.804 | 0.754 | 0.824 | 0.735 |
| 309 | 0.910 | 0.775 | 0.740 | 0.808 | 0.712 |
| 310 | 0.928 | 0.778 | 0.760 | 0.821 | 0.732 |
| 311 | 0.922 | 0.804 | 0.746 | 0.824 | 0.735 |
| 312 | 0.916 | 0.791 | 0.719 | 0.809 | 0.713 |
| 313 | 0.925 | 0.783 | 0.710 | 0.806 | 0.708 |
| 314 | 0.919 | 0.767 | 0.722 | 0.802 | 0.703 |
| 315 | 0.905 | 0.783 | 0.731 | 0.806 | 0.709 |
| 316 | 0.919 | 0.791 | 0.731 | 0.813 | 0.720 |
| 317 | 0.893 | 0.793 | 0.772 | 0.819 | 0.729 |
| 318 | 0.908 | 0.809 | 0.784 | 0.833 | 0.750 |
| 319 | 0.913 | 0.817 | 0.751 | 0.828 | 0.741 |
| 320 | 0.919 | 0.796 | 0.760 | 0.825 | 0.737 |
| 321 | 0.908 | 0.788 | 0.743 | 0.813 | 0.719 |
| 322 | 0.931 | 0.767 | 0.737 | 0.811 | 0.716 |
| 323 | 0.910 | 0.814 | 0.746 | 0.824 | 0.735 |
| 324 | 0.928 | 0.770 | 0.743 | 0.813 | 0.719 |
| 325 | 0.899 | 0.770 | 0.716 | 0.795 | 0.692 |
| 326 | 0.910 | 0.778 | 0.713 | 0.800 | 0.700 |
| 327 | 0.934 | 0.801 | 0.766 | 0.833 | 0.749 |
| 328 | 0.919 | 0.765 | 0.763 | 0.814 | 0.722 |
| 329 | 0.910 | 0.788 | 0.731 | 0.810 | 0.714 |
| 330 | 0.905 | 0.796 | 0.734 | 0.812 | 0.717 |
| 331 | 0.922 | 0.791 | 0.737 | 0.816 | 0.724 |
| 332 | 0.919 | 0.822 | 0.760 | 0.834 | 0.751 |
| 333 | 0.913 | 0.786 | 0.749 | 0.815 | 0.723 |
| 334 | 0.913 | 0.760 | 0.754 | 0.808 | 0.712 |
| 335 | 0.931 | 0.804 | 0.757 | 0.830 | 0.745 |
| 336 | 0.916 | 0.806 | 0.740 | 0.821 | 0.731 |
| 337 | 0.882 | 0.824 | 0.743 | 0.817 | 0.726 |
| 338 | 0.928 | 0.804 | 0.725 | 0.819 | 0.728 |
| 339 | 0.893 | 0.786 | 0.743 | 0.807 | 0.710 |

|     |       |       |       |       |       |
|-----|-------|-------|-------|-------|-------|
| 340 | 0.896 | 0.788 | 0.751 | 0.812 | 0.717 |
| 341 | 0.919 | 0.780 | 0.740 | 0.813 | 0.719 |
| 342 | 0.919 | 0.762 | 0.746 | 0.808 | 0.712 |
| 343 | 0.910 | 0.804 | 0.737 | 0.817 | 0.725 |
| 344 | 0.902 | 0.798 | 0.766 | 0.822 | 0.733 |
| 345 | 0.916 | 0.809 | 0.737 | 0.821 | 0.731 |
| 346 | 0.902 | 0.806 | 0.763 | 0.824 | 0.735 |
| 347 | 0.899 | 0.788 | 0.757 | 0.814 | 0.722 |
| 348 | 0.922 | 0.811 | 0.734 | 0.823 | 0.734 |
| 349 | 0.893 | 0.767 | 0.734 | 0.798 | 0.696 |
| 350 | 0.908 | 0.788 | 0.740 | 0.812 | 0.717 |
| 351 | 0.905 | 0.788 | 0.766 | 0.819 | 0.729 |
| 352 | 0.916 | 0.786 | 0.751 | 0.817 | 0.726 |
| 353 | 0.893 | 0.780 | 0.731 | 0.801 | 0.702 |
| 354 | 0.925 | 0.801 | 0.725 | 0.817 | 0.725 |
| 355 | 0.908 | 0.765 | 0.754 | 0.808 | 0.712 |
| 356 | 0.908 | 0.798 | 0.740 | 0.815 | 0.723 |
| 357 | 0.922 | 0.775 | 0.751 | 0.815 | 0.723 |
| 358 | 0.922 | 0.778 | 0.740 | 0.813 | 0.719 |
| 359 | 0.922 | 0.811 | 0.728 | 0.821 | 0.731 |
| 360 | 0.899 | 0.757 | 0.781 | 0.811 | 0.717 |
| 361 | 0.910 | 0.819 | 0.728 | 0.820 | 0.729 |
| 362 | 0.908 | 0.809 | 0.763 | 0.827 | 0.740 |
| 363 | 0.905 | 0.809 | 0.728 | 0.814 | 0.721 |
| 364 | 0.916 | 0.788 | 0.746 | 0.816 | 0.724 |
| 365 | 0.890 | 0.814 | 0.784 | 0.829 | 0.744 |
| 366 | 0.913 | 0.791 | 0.719 | 0.808 | 0.711 |
| 367 | 0.910 | 0.811 | 0.743 | 0.822 | 0.732 |
| 368 | 0.910 | 0.801 | 0.743 | 0.818 | 0.727 |
| 369 | 0.916 | 0.783 | 0.772 | 0.823 | 0.734 |
| 370 | 0.913 | 0.801 | 0.740 | 0.818 | 0.727 |
| 371 | 0.905 | 0.796 | 0.734 | 0.812 | 0.717 |
| 372 | 0.910 | 0.817 | 0.754 | 0.828 | 0.741 |
| 373 | 0.910 | 0.783 | 0.746 | 0.813 | 0.718 |
| 374 | 0.905 | 0.773 | 0.754 | 0.810 | 0.715 |
| 375 | 0.902 | 0.773 | 0.749 | 0.807 | 0.710 |
| 376 | 0.905 | 0.798 | 0.746 | 0.816 | 0.724 |
| 377 | 0.922 | 0.767 | 0.749 | 0.812 | 0.718 |
| 378 | 0.905 | 0.767 | 0.740 | 0.803 | 0.705 |
| 379 | 0.913 | 0.793 | 0.734 | 0.813 | 0.720 |
| 380 | 0.905 | 0.796 | 0.725 | 0.809 | 0.713 |
| 381 | 0.936 | 0.780 | 0.751 | 0.822 | 0.733 |

|     |       |       |       |       |       |
|-----|-------|-------|-------|-------|-------|
| 382 | 0.919 | 0.788 | 0.734 | 0.813 | 0.720 |
| 383 | 0.890 | 0.775 | 0.737 | 0.800 | 0.700 |
| 384 | 0.925 | 0.788 | 0.766 | 0.826 | 0.738 |
| 385 | 0.908 | 0.783 | 0.737 | 0.809 | 0.713 |
| 386 | 0.902 | 0.793 | 0.746 | 0.813 | 0.720 |
| 387 | 0.905 | 0.780 | 0.754 | 0.813 | 0.719 |
| 388 | 0.908 | 0.809 | 0.740 | 0.819 | 0.728 |
| 389 | 0.934 | 0.786 | 0.751 | 0.823 | 0.734 |
| 390 | 0.913 | 0.796 | 0.731 | 0.813 | 0.720 |
| 391 | 0.890 | 0.780 | 0.781 | 0.816 | 0.725 |
| 392 | 0.902 | 0.796 | 0.749 | 0.815 | 0.723 |
| 393 | 0.910 | 0.809 | 0.725 | 0.815 | 0.722 |
| 394 | 0.928 | 0.783 | 0.716 | 0.809 | 0.713 |
| 395 | 0.902 | 0.783 | 0.751 | 0.812 | 0.717 |
| 396 | 0.913 | 0.801 | 0.731 | 0.815 | 0.723 |
| 397 | 0.913 | 0.824 | 0.713 | 0.818 | 0.727 |
| 398 | 0.899 | 0.778 | 0.769 | 0.814 | 0.722 |
| 399 | 0.908 | 0.806 | 0.740 | 0.818 | 0.727 |
| 400 | 0.910 | 0.749 | 0.737 | 0.798 | 0.697 |
| 401 | 0.893 | 0.801 | 0.751 | 0.815 | 0.723 |
| 402 | 0.913 | 0.793 | 0.731 | 0.813 | 0.718 |
| 403 | 0.902 | 0.796 | 0.749 | 0.815 | 0.723 |
| 404 | 0.922 | 0.819 | 0.746 | 0.829 | 0.744 |
| 405 | 0.899 | 0.796 | 0.781 | 0.825 | 0.737 |
| 406 | 0.910 | 0.817 | 0.769 | 0.832 | 0.748 |
| 407 | 0.908 | 0.791 | 0.737 | 0.812 | 0.717 |
| 408 | 0.890 | 0.775 | 0.746 | 0.803 | 0.705 |
| 409 | 0.908 | 0.786 | 0.737 | 0.810 | 0.714 |
| 410 | 0.916 | 0.793 | 0.737 | 0.815 | 0.723 |
| 411 | 0.916 | 0.801 | 0.754 | 0.824 | 0.735 |
| 412 | 0.896 | 0.783 | 0.743 | 0.807 | 0.710 |
| 413 | 0.908 | 0.804 | 0.737 | 0.816 | 0.724 |
| 414 | 0.910 | 0.778 | 0.757 | 0.814 | 0.721 |
| 415 | 0.925 | 0.780 | 0.749 | 0.817 | 0.726 |
| 416 | 0.919 | 0.793 | 0.716 | 0.810 | 0.714 |
| 417 | 0.908 | 0.806 | 0.740 | 0.818 | 0.727 |
| 418 | 0.902 | 0.786 | 0.778 | 0.821 | 0.732 |
| 419 | 0.902 | 0.796 | 0.757 | 0.818 | 0.727 |
| 420 | 0.899 | 0.762 | 0.754 | 0.804 | 0.707 |
| 421 | 0.916 | 0.780 | 0.766 | 0.820 | 0.730 |
| 422 | 0.925 | 0.788 | 0.757 | 0.823 | 0.734 |
| 423 | 0.913 | 0.814 | 0.731 | 0.820 | 0.729 |

|     |       |       |       |       |       |
|-----|-------|-------|-------|-------|-------|
| 424 | 0.925 | 0.767 | 0.757 | 0.815 | 0.723 |
| 425 | 0.913 | 0.791 | 0.760 | 0.821 | 0.731 |
| 426 | 0.908 | 0.796 | 0.781 | 0.828 | 0.741 |
| 427 | 0.902 | 0.778 | 0.740 | 0.806 | 0.709 |
| 428 | 0.905 | 0.791 | 0.731 | 0.809 | 0.713 |
| 429 | 0.913 | 0.801 | 0.754 | 0.823 | 0.734 |
| 430 | 0.910 | 0.775 | 0.781 | 0.821 | 0.732 |
| 431 | 0.908 | 0.824 | 0.737 | 0.824 | 0.735 |
| 432 | 0.910 | 0.783 | 0.763 | 0.818 | 0.727 |
| 433 | 0.908 | 0.783 | 0.757 | 0.815 | 0.723 |
| 434 | 0.910 | 0.804 | 0.737 | 0.817 | 0.725 |
| 435 | 0.899 | 0.793 | 0.760 | 0.817 | 0.726 |
| 436 | 0.902 | 0.778 | 0.722 | 0.800 | 0.700 |
| 437 | 0.913 | 0.770 | 0.725 | 0.802 | 0.703 |
| 438 | 0.925 | 0.773 | 0.719 | 0.805 | 0.707 |
| 439 | 0.905 | 0.809 | 0.704 | 0.807 | 0.710 |
| 440 | 0.896 | 0.796 | 0.749 | 0.813 | 0.720 |
| 441 | 0.913 | 0.760 | 0.754 | 0.808 | 0.712 |
| 442 | 0.922 | 0.798 | 0.701 | 0.808 | 0.711 |
| 443 | 0.925 | 0.788 | 0.737 | 0.816 | 0.724 |
| 444 | 0.916 | 0.773 | 0.707 | 0.799 | 0.697 |
| 445 | 0.922 | 0.775 | 0.746 | 0.813 | 0.720 |
| 446 | 0.870 | 0.796 | 0.757 | 0.808 | 0.712 |
| 447 | 0.925 | 0.786 | 0.725 | 0.812 | 0.717 |
| 448 | 0.899 | 0.829 | 0.731 | 0.821 | 0.731 |
| 449 | 0.908 | 0.783 | 0.754 | 0.814 | 0.722 |
| 450 | 0.910 | 0.773 | 0.760 | 0.813 | 0.721 |
| 451 | 0.916 | 0.767 | 0.769 | 0.816 | 0.725 |
| 452 | 0.896 | 0.809 | 0.740 | 0.815 | 0.723 |
| 453 | 0.902 | 0.778 | 0.737 | 0.805 | 0.707 |
| 454 | 0.910 | 0.804 | 0.775 | 0.829 | 0.744 |
| 455 | 0.910 | 0.793 | 0.725 | 0.810 | 0.714 |
| 456 | 0.919 | 0.793 | 0.740 | 0.817 | 0.726 |
| 457 | 0.922 | 0.783 | 0.743 | 0.815 | 0.723 |
| 458 | 0.916 | 0.814 | 0.722 | 0.818 | 0.727 |
| 459 | 0.919 | 0.780 | 0.754 | 0.817 | 0.726 |
| 460 | 0.905 | 0.793 | 0.740 | 0.813 | 0.718 |
| 461 | 0.919 | 0.770 | 0.710 | 0.799 | 0.699 |
| 462 | 0.910 | 0.809 | 0.746 | 0.822 | 0.732 |
| 463 | 0.910 | 0.806 | 0.728 | 0.815 | 0.722 |
| 464 | 0.908 | 0.829 | 0.772 | 0.837 | 0.755 |
| 465 | 0.910 | 0.804 | 0.757 | 0.824 | 0.735 |

|     |       |       |       |       |       |
|-----|-------|-------|-------|-------|-------|
| 466 | 0.896 | 0.780 | 0.772 | 0.815 | 0.723 |
| 467 | 0.916 | 0.811 | 0.722 | 0.817 | 0.725 |
| 468 | 0.919 | 0.783 | 0.769 | 0.823 | 0.734 |
| 469 | 0.896 | 0.786 | 0.751 | 0.811 | 0.716 |
| 470 | 0.919 | 0.791 | 0.737 | 0.815 | 0.723 |
| 471 | 0.913 | 0.780 | 0.749 | 0.813 | 0.720 |
| 472 | 0.922 | 0.773 | 0.734 | 0.809 | 0.713 |
| 473 | 0.922 | 0.801 | 0.746 | 0.823 | 0.734 |
| 474 | 0.916 | 0.775 | 0.728 | 0.806 | 0.709 |
| 475 | 0.928 | 0.804 | 0.781 | 0.837 | 0.755 |
| 476 | 0.925 | 0.767 | 0.769 | 0.819 | 0.729 |
| 477 | 0.905 | 0.817 | 0.707 | 0.811 | 0.715 |
| 478 | 0.893 | 0.814 | 0.760 | 0.823 | 0.734 |
| 479 | 0.908 | 0.850 | 0.763 | 0.842 | 0.762 |
| 480 | 0.908 | 0.788 | 0.737 | 0.811 | 0.716 |
| 481 | 0.916 | 0.819 | 0.740 | 0.826 | 0.738 |
| 482 | 0.910 | 0.770 | 0.725 | 0.801 | 0.702 |
| 483 | 0.910 | 0.798 | 0.743 | 0.817 | 0.726 |
| 484 | 0.922 | 0.793 | 0.772 | 0.828 | 0.743 |
| 485 | 0.916 | 0.798 | 0.781 | 0.831 | 0.747 |
| 486 | 0.908 | 0.762 | 0.734 | 0.800 | 0.701 |
| 487 | 0.916 | 0.801 | 0.766 | 0.828 | 0.741 |
| 488 | 0.925 | 0.798 | 0.754 | 0.826 | 0.738 |
| 489 | 0.910 | 0.773 | 0.743 | 0.808 | 0.712 |
| 490 | 0.916 | 0.817 | 0.725 | 0.820 | 0.729 |
| 491 | 0.928 | 0.786 | 0.740 | 0.817 | 0.726 |
| 492 | 0.928 | 0.801 | 0.746 | 0.825 | 0.737 |
| 493 | 0.922 | 0.793 | 0.710 | 0.809 | 0.713 |
| 494 | 0.908 | 0.786 | 0.754 | 0.815 | 0.723 |
| 495 | 0.908 | 0.806 | 0.778 | 0.830 | 0.746 |
| 496 | 0.913 | 0.791 | 0.704 | 0.803 | 0.704 |
| 497 | 0.913 | 0.801 | 0.746 | 0.820 | 0.730 |
| 498 | 0.893 | 0.811 | 0.746 | 0.817 | 0.725 |
| 499 | 0.928 | 0.796 | 0.725 | 0.816 | 0.724 |
| 500 | 0.922 | 0.798 | 0.746 | 0.822 | 0.732 |
| 501 | 0.902 | 0.806 | 0.781 | 0.829 | 0.744 |
| 502 | 0.908 | 0.788 | 0.734 | 0.810 | 0.714 |
| 503 | 0.905 | 0.811 | 0.743 | 0.820 | 0.730 |
| 504 | 0.928 | 0.757 | 0.781 | 0.820 | 0.731 |
| 505 | 0.922 | 0.804 | 0.760 | 0.828 | 0.742 |
| 506 | 0.919 | 0.786 | 0.722 | 0.809 | 0.713 |
| 507 | 0.931 | 0.765 | 0.751 | 0.814 | 0.722 |

|     |       |       |       |       |       |
|-----|-------|-------|-------|-------|-------|
| 508 | 0.913 | 0.798 | 0.749 | 0.820 | 0.730 |
| 509 | 0.908 | 0.801 | 0.781 | 0.829 | 0.744 |
| 510 | 0.919 | 0.786 | 0.746 | 0.816 | 0.724 |
| 511 | 0.902 | 0.832 | 0.719 | 0.819 | 0.728 |
| 512 | 0.899 | 0.793 | 0.716 | 0.803 | 0.704 |
| 513 | 0.922 | 0.814 | 0.740 | 0.826 | 0.738 |
| 514 | 0.908 | 0.806 | 0.746 | 0.820 | 0.730 |
| 515 | 0.902 | 0.796 | 0.734 | 0.811 | 0.716 |
| 516 | 0.902 | 0.806 | 0.746 | 0.818 | 0.727 |
| 517 | 0.905 | 0.819 | 0.710 | 0.813 | 0.718 |
| 518 | 0.922 | 0.804 | 0.722 | 0.816 | 0.724 |
| 519 | 0.913 | 0.786 | 0.766 | 0.821 | 0.731 |
| 520 | 0.913 | 0.786 | 0.728 | 0.809 | 0.713 |
| 521 | 0.910 | 0.811 | 0.746 | 0.823 | 0.734 |
| 522 | 0.899 | 0.775 | 0.769 | 0.813 | 0.721 |
| 523 | 0.928 | 0.773 | 0.772 | 0.823 | 0.735 |
| 524 | 0.910 | 0.809 | 0.731 | 0.817 | 0.725 |
| 525 | 0.908 | 0.783 | 0.722 | 0.804 | 0.706 |
| 526 | 0.931 | 0.811 | 0.716 | 0.820 | 0.729 |
| 527 | 0.908 | 0.767 | 0.769 | 0.813 | 0.721 |
| 528 | 0.913 | 0.765 | 0.749 | 0.808 | 0.712 |
| 529 | 0.913 | 0.770 | 0.722 | 0.801 | 0.702 |
| 530 | 0.902 | 0.832 | 0.731 | 0.823 | 0.734 |
| 531 | 0.905 | 0.817 | 0.722 | 0.815 | 0.722 |
| 532 | 0.908 | 0.788 | 0.743 | 0.813 | 0.719 |
| 533 | 0.913 | 0.822 | 0.734 | 0.824 | 0.735 |
| 534 | 0.902 | 0.804 | 0.763 | 0.823 | 0.734 |
| 535 | 0.902 | 0.804 | 0.740 | 0.815 | 0.722 |
| 536 | 0.893 | 0.801 | 0.740 | 0.812 | 0.717 |
| 537 | 0.916 | 0.801 | 0.740 | 0.819 | 0.728 |
| 538 | 0.905 | 0.773 | 0.766 | 0.813 | 0.721 |
| 539 | 0.913 | 0.773 | 0.734 | 0.806 | 0.709 |
| 540 | 0.896 | 0.767 | 0.781 | 0.813 | 0.721 |
| 541 | 0.922 | 0.752 | 0.775 | 0.814 | 0.723 |
| 542 | 0.899 | 0.791 | 0.728 | 0.806 | 0.709 |
| 543 | 0.910 | 0.809 | 0.749 | 0.823 | 0.734 |
| 544 | 0.919 | 0.788 | 0.757 | 0.821 | 0.731 |
| 545 | 0.902 | 0.791 | 0.731 | 0.808 | 0.711 |
| 546 | 0.905 | 0.765 | 0.772 | 0.813 | 0.720 |
| 547 | 0.910 | 0.791 | 0.725 | 0.809 | 0.713 |
| 548 | 0.916 | 0.798 | 0.737 | 0.817 | 0.725 |
| 549 | 0.899 | 0.765 | 0.781 | 0.813 | 0.721 |



|     |       |       |       |       |       |
|-----|-------|-------|-------|-------|-------|
| 550 | 0.913 | 0.806 | 0.749 | 0.823 | 0.734 |
| 551 | 0.910 | 0.780 | 0.763 | 0.817 | 0.726 |
| 552 | 0.908 | 0.773 | 0.731 | 0.803 | 0.705 |
| 553 | 0.919 | 0.791 | 0.757 | 0.822 | 0.733 |
| 554 | 0.899 | 0.801 | 0.746 | 0.815 | 0.723 |
| 555 | 0.908 | 0.767 | 0.769 | 0.813 | 0.721 |
| 556 | 0.919 | 0.791 | 0.757 | 0.822 | 0.733 |
| 557 | 0.916 | 0.786 | 0.746 | 0.815 | 0.723 |
| 558 | 0.931 | 0.806 | 0.754 | 0.830 | 0.745 |
| 559 | 0.910 | 0.780 | 0.760 | 0.816 | 0.724 |
| 560 | 0.919 | 0.783 | 0.787 | 0.828 | 0.744 |
| 561 | 0.899 | 0.760 | 0.725 | 0.794 | 0.690 |
| 562 | 0.919 | 0.760 | 0.731 | 0.802 | 0.703 |
| 563 | 0.919 | 0.819 | 0.766 | 0.835 | 0.752 |
| 564 | 0.916 | 0.786 | 0.737 | 0.813 | 0.718 |
| 565 | 0.913 | 0.786 | 0.716 | 0.805 | 0.707 |
| 566 | 0.925 | 0.796 | 0.749 | 0.823 | 0.734 |
| 567 | 0.908 | 0.796 | 0.722 | 0.809 | 0.713 |
| 568 | 0.905 | 0.786 | 0.728 | 0.806 | 0.708 |
| 569 | 0.902 | 0.809 | 0.743 | 0.818 | 0.727 |
| 570 | 0.922 | 0.793 | 0.772 | 0.828 | 0.743 |
| 571 | 0.919 | 0.780 | 0.781 | 0.826 | 0.739 |
| 572 | 0.905 | 0.806 | 0.731 | 0.814 | 0.721 |
| 573 | 0.908 | 0.788 | 0.746 | 0.813 | 0.720 |
| 574 | 0.919 | 0.767 | 0.731 | 0.805 | 0.707 |
| 575 | 0.916 | 0.780 | 0.707 | 0.801 | 0.701 |
| 576 | 0.922 | 0.814 | 0.775 | 0.837 | 0.755 |
| 577 | 0.913 | 0.791 | 0.749 | 0.817 | 0.726 |
| 578 | 0.913 | 0.783 | 0.760 | 0.818 | 0.727 |
| 579 | 0.908 | 0.804 | 0.743 | 0.818 | 0.727 |
| 580 | 0.882 | 0.804 | 0.781 | 0.822 | 0.733 |
| 581 | 0.919 | 0.804 | 0.772 | 0.831 | 0.747 |
| 582 | 0.925 | 0.755 | 0.763 | 0.813 | 0.719 |
| 583 | 0.896 | 0.773 | 0.728 | 0.799 | 0.697 |
| 584 | 0.916 | 0.804 | 0.757 | 0.826 | 0.738 |
| 585 | 0.902 | 0.760 | 0.725 | 0.795 | 0.692 |
| 586 | 0.916 | 0.780 | 0.746 | 0.813 | 0.720 |
| 587 | 0.922 | 0.796 | 0.751 | 0.823 | 0.734 |
| 588 | 0.910 | 0.798 | 0.749 | 0.819 | 0.728 |
| 589 | 0.908 | 0.791 | 0.751 | 0.816 | 0.724 |
| 590 | 0.913 | 0.767 | 0.754 | 0.811 | 0.716 |
| 591 | 0.910 | 0.783 | 0.722 | 0.805 | 0.707 |

|     |       |       |       |       |       |
|-----|-------|-------|-------|-------|-------|
| 592 | 0.928 | 0.809 | 0.751 | 0.829 | 0.744 |
| 593 | 0.896 | 0.783 | 0.746 | 0.808 | 0.712 |
| 594 | 0.928 | 0.773 | 0.746 | 0.814 | 0.722 |
| 595 | 0.919 | 0.822 | 0.751 | 0.831 | 0.746 |
| 596 | 0.916 | 0.767 | 0.722 | 0.801 | 0.702 |
| 597 | 0.916 | 0.793 | 0.775 | 0.828 | 0.741 |
| 598 | 0.922 | 0.806 | 0.740 | 0.823 | 0.734 |
| 599 | 0.913 | 0.809 | 0.743 | 0.822 | 0.732 |
| 600 | 0.925 | 0.778 | 0.734 | 0.812 | 0.717 |
| 601 | 0.928 | 0.804 | 0.734 | 0.822 | 0.732 |
| 602 | 0.928 | 0.796 | 0.787 | 0.836 | 0.754 |
| 603 | 0.919 | 0.806 | 0.749 | 0.825 | 0.737 |
| 604 | 0.916 | 0.786 | 0.728 | 0.810 | 0.714 |
| 605 | 0.902 | 0.757 | 0.799 | 0.817 | 0.728 |
| 606 | 0.922 | 0.786 | 0.719 | 0.809 | 0.713 |
| 607 | 0.928 | 0.760 | 0.728 | 0.804 | 0.706 |
| 608 | 0.922 | 0.762 | 0.757 | 0.813 | 0.719 |
| 609 | 0.913 | 0.796 | 0.719 | 0.810 | 0.714 |
| 610 | 0.916 | 0.780 | 0.737 | 0.811 | 0.716 |
| 611 | 0.910 | 0.817 | 0.722 | 0.817 | 0.725 |
| 612 | 0.919 | 0.760 | 0.740 | 0.805 | 0.708 |
| 613 | 0.928 | 0.773 | 0.728 | 0.809 | 0.713 |
| 614 | 0.922 | 0.832 | 0.749 | 0.835 | 0.752 |
| 615 | 0.928 | 0.791 | 0.722 | 0.813 | 0.720 |
| 616 | 0.928 | 0.817 | 0.743 | 0.829 | 0.744 |
| 617 | 0.913 | 0.786 | 0.740 | 0.813 | 0.719 |
| 618 | 0.908 | 0.811 | 0.749 | 0.823 | 0.734 |
| 619 | 0.913 | 0.773 | 0.728 | 0.804 | 0.706 |
| 620 | 0.919 | 0.796 | 0.763 | 0.826 | 0.738 |
| 621 | 0.910 | 0.780 | 0.707 | 0.799 | 0.699 |
| 622 | 0.916 | 0.788 | 0.746 | 0.816 | 0.724 |
| 623 | 0.934 | 0.793 | 0.749 | 0.825 | 0.737 |
| 624 | 0.925 | 0.765 | 0.751 | 0.813 | 0.719 |
| 625 | 0.910 | 0.793 | 0.746 | 0.816 | 0.724 |
| 626 | 0.916 | 0.780 | 0.781 | 0.825 | 0.737 |
| 627 | 0.925 | 0.762 | 0.760 | 0.814 | 0.722 |
| 628 | 0.928 | 0.778 | 0.769 | 0.824 | 0.736 |
| 629 | 0.910 | 0.762 | 0.725 | 0.799 | 0.698 |
| 630 | 0.913 | 0.806 | 0.728 | 0.816 | 0.724 |
| 631 | 0.916 | 0.767 | 0.731 | 0.804 | 0.706 |
| 632 | 0.925 | 0.804 | 0.737 | 0.822 | 0.733 |
| 633 | 0.908 | 0.780 | 0.746 | 0.811 | 0.716 |

|     |       |       |       |       |       |
|-----|-------|-------|-------|-------|-------|
| 634 | 0.908 | 0.770 | 0.737 | 0.804 | 0.706 |
| 635 | 0.908 | 0.786 | 0.734 | 0.809 | 0.713 |
| 636 | 0.910 | 0.778 | 0.728 | 0.805 | 0.707 |
| 637 | 0.910 | 0.793 | 0.731 | 0.812 | 0.717 |
| 638 | 0.925 | 0.770 | 0.728 | 0.807 | 0.710 |
| 639 | 0.890 | 0.773 | 0.754 | 0.805 | 0.708 |
| 640 | 0.910 | 0.814 | 0.740 | 0.822 | 0.732 |
| 641 | 0.905 | 0.788 | 0.769 | 0.820 | 0.730 |
| 642 | 0.899 | 0.827 | 0.751 | 0.827 | 0.739 |
| 643 | 0.896 | 0.778 | 0.737 | 0.803 | 0.704 |
| 644 | 0.913 | 0.762 | 0.746 | 0.806 | 0.709 |
| 645 | 0.919 | 0.791 | 0.746 | 0.818 | 0.727 |
| 646 | 0.913 | 0.798 | 0.757 | 0.823 | 0.734 |
| 647 | 0.913 | 0.773 | 0.746 | 0.810 | 0.715 |
| 648 | 0.916 | 0.791 | 0.769 | 0.825 | 0.737 |
| 649 | 0.919 | 0.773 | 0.725 | 0.805 | 0.707 |
| 650 | 0.922 | 0.796 | 0.751 | 0.823 | 0.734 |
| 651 | 0.916 | 0.786 | 0.740 | 0.813 | 0.720 |
| 652 | 0.936 | 0.806 | 0.734 | 0.826 | 0.738 |
| 653 | 0.931 | 0.783 | 0.731 | 0.814 | 0.721 |
| 654 | 0.919 | 0.762 | 0.707 | 0.796 | 0.693 |
| 655 | 0.899 | 0.793 | 0.734 | 0.809 | 0.713 |
| 656 | 0.910 | 0.788 | 0.725 | 0.808 | 0.711 |
| 657 | 0.942 | 0.835 | 0.731 | 0.837 | 0.755 |
| 658 | 0.910 | 0.793 | 0.763 | 0.822 | 0.733 |
| 659 | 0.908 | 0.791 | 0.751 | 0.816 | 0.724 |
| 660 | 0.902 | 0.796 | 0.757 | 0.818 | 0.727 |
| 661 | 0.910 | 0.783 | 0.746 | 0.813 | 0.719 |
| 662 | 0.922 | 0.773 | 0.731 | 0.808 | 0.711 |
| 663 | 0.910 | 0.783 | 0.707 | 0.800 | 0.700 |
| 664 | 0.905 | 0.798 | 0.754 | 0.819 | 0.728 |
| 665 | 0.899 | 0.780 | 0.734 | 0.804 | 0.706 |
| 666 | 0.931 | 0.783 | 0.760 | 0.824 | 0.736 |
| 667 | 0.919 | 0.783 | 0.737 | 0.813 | 0.719 |
| 668 | 0.905 | 0.791 | 0.760 | 0.818 | 0.727 |
| 669 | 0.919 | 0.762 | 0.749 | 0.809 | 0.714 |
| 670 | 0.922 | 0.775 | 0.751 | 0.815 | 0.723 |
| 671 | 0.922 | 0.775 | 0.731 | 0.809 | 0.713 |
| 672 | 0.922 | 0.811 | 0.713 | 0.816 | 0.724 |
| 673 | 0.910 | 0.791 | 0.763 | 0.821 | 0.731 |
| 674 | 0.913 | 0.793 | 0.728 | 0.812 | 0.717 |
| 675 | 0.919 | 0.749 | 0.751 | 0.805 | 0.708 |

|     |       |       |       |       |       |
|-----|-------|-------|-------|-------|-------|
| 676 | 0.948 | 0.811 | 0.719 | 0.827 | 0.739 |
| 677 | 0.910 | 0.780 | 0.754 | 0.814 | 0.722 |
| 678 | 0.931 | 0.783 | 0.763 | 0.825 | 0.737 |
| 679 | 0.934 | 0.778 | 0.734 | 0.814 | 0.721 |
| 680 | 0.916 | 0.770 | 0.751 | 0.812 | 0.718 |
| 681 | 0.899 | 0.783 | 0.716 | 0.799 | 0.699 |
| 682 | 0.905 | 0.804 | 0.740 | 0.816 | 0.724 |
| 683 | 0.910 | 0.817 | 0.725 | 0.818 | 0.727 |
| 684 | 0.934 | 0.811 | 0.751 | 0.832 | 0.748 |
| 685 | 0.928 | 0.780 | 0.725 | 0.811 | 0.716 |
| 686 | 0.925 | 0.809 | 0.754 | 0.829 | 0.744 |
| 687 | 0.931 | 0.752 | 0.734 | 0.804 | 0.707 |
| 688 | 0.919 | 0.811 | 0.751 | 0.828 | 0.741 |
| 689 | 0.919 | 0.788 | 0.743 | 0.816 | 0.724 |
| 690 | 0.934 | 0.788 | 0.737 | 0.819 | 0.728 |
| 691 | 0.913 | 0.780 | 0.743 | 0.812 | 0.717 |
| 692 | 0.896 | 0.786 | 0.757 | 0.813 | 0.719 |
| 693 | 0.922 | 0.798 | 0.787 | 0.835 | 0.753 |
| 694 | 0.922 | 0.770 | 0.737 | 0.809 | 0.713 |
| 695 | 0.925 | 0.793 | 0.772 | 0.829 | 0.744 |
| 696 | 0.913 | 0.775 | 0.713 | 0.800 | 0.700 |
| 697 | 0.931 | 0.778 | 0.725 | 0.811 | 0.716 |
| 698 | 0.928 | 0.819 | 0.743 | 0.830 | 0.745 |
| 699 | 0.913 | 0.788 | 0.754 | 0.818 | 0.727 |
| 700 | 0.913 | 0.788 | 0.743 | 0.814 | 0.721 |
| 701 | 0.916 | 0.822 | 0.743 | 0.828 | 0.741 |
| 702 | 0.913 | 0.767 | 0.754 | 0.811 | 0.716 |
| 703 | 0.919 | 0.801 | 0.737 | 0.819 | 0.728 |
| 704 | 0.910 | 0.822 | 0.713 | 0.816 | 0.724 |
| 705 | 0.919 | 0.778 | 0.754 | 0.816 | 0.725 |
| 706 | 0.928 | 0.788 | 0.737 | 0.817 | 0.726 |
| 707 | 0.919 | 0.757 | 0.772 | 0.814 | 0.722 |
| 708 | 0.922 | 0.762 | 0.746 | 0.809 | 0.713 |
| 709 | 0.916 | 0.775 | 0.737 | 0.809 | 0.713 |
| 710 | 0.916 | 0.775 | 0.766 | 0.818 | 0.727 |
| 711 | 0.919 | 0.773 | 0.725 | 0.805 | 0.707 |
| 712 | 0.931 | 0.806 | 0.749 | 0.828 | 0.742 |
| 713 | 0.925 | 0.811 | 0.760 | 0.832 | 0.748 |
| 714 | 0.908 | 0.806 | 0.731 | 0.815 | 0.723 |
| 715 | 0.922 | 0.788 | 0.716 | 0.809 | 0.713 |
| 716 | 0.919 | 0.798 | 0.719 | 0.813 | 0.718 |
| 717 | 0.916 | 0.788 | 0.710 | 0.805 | 0.707 |

|     |       |       |       |       |       |
|-----|-------|-------|-------|-------|-------|
| 718 | 0.922 | 0.791 | 0.713 | 0.809 | 0.713 |
| 719 | 0.925 | 0.760 | 0.725 | 0.802 | 0.703 |
| 720 | 0.910 | 0.788 | 0.713 | 0.804 | 0.706 |
| 721 | 0.910 | 0.765 | 0.760 | 0.811 | 0.716 |
| 722 | 0.919 | 0.804 | 0.728 | 0.817 | 0.725 |
| 723 | 0.936 | 0.793 | 0.766 | 0.831 | 0.747 |
| 724 | 0.910 | 0.786 | 0.740 | 0.812 | 0.717 |
| 725 | 0.928 | 0.783 | 0.746 | 0.818 | 0.727 |
| 726 | 0.934 | 0.804 | 0.746 | 0.828 | 0.741 |
| 727 | 0.908 | 0.767 | 0.769 | 0.813 | 0.721 |
| 728 | 0.908 | 0.804 | 0.743 | 0.818 | 0.727 |
| 729 | 0.922 | 0.814 | 0.754 | 0.830 | 0.745 |
| 730 | 0.916 | 0.786 | 0.754 | 0.818 | 0.727 |
| 731 | 0.913 | 0.752 | 0.769 | 0.810 | 0.716 |
| 732 | 0.910 | 0.819 | 0.749 | 0.827 | 0.739 |
| 733 | 0.919 | 0.806 | 0.751 | 0.826 | 0.738 |
| 734 | 0.919 | 0.786 | 0.728 | 0.811 | 0.716 |
| 735 | 0.908 | 0.817 | 0.763 | 0.829 | 0.744 |
| 736 | 0.908 | 0.806 | 0.751 | 0.822 | 0.733 |
| 737 | 0.913 | 0.752 | 0.740 | 0.800 | 0.701 |
| 738 | 0.896 | 0.783 | 0.731 | 0.803 | 0.705 |
| 739 | 0.925 | 0.786 | 0.704 | 0.805 | 0.707 |
| 740 | 0.905 | 0.798 | 0.734 | 0.813 | 0.718 |
| 741 | 0.928 | 0.767 | 0.754 | 0.815 | 0.723 |
| 742 | 0.910 | 0.767 | 0.740 | 0.805 | 0.708 |
| 743 | 0.905 | 0.778 | 0.737 | 0.806 | 0.709 |
| 744 | 0.913 | 0.752 | 0.751 | 0.804 | 0.707 |
| 745 | 0.916 | 0.793 | 0.731 | 0.813 | 0.720 |
| 746 | 0.913 | 0.780 | 0.713 | 0.802 | 0.703 |
| 747 | 0.905 | 0.796 | 0.722 | 0.808 | 0.711 |
| 748 | 0.899 | 0.793 | 0.734 | 0.809 | 0.713 |
| 749 | 0.922 | 0.778 | 0.713 | 0.804 | 0.706 |
| 750 | 0.925 | 0.780 | 0.746 | 0.816 | 0.724 |
| 751 | 0.928 | 0.783 | 0.740 | 0.816 | 0.724 |
| 752 | 0.908 | 0.775 | 0.740 | 0.807 | 0.710 |
| 753 | 0.922 | 0.778 | 0.722 | 0.807 | 0.710 |
| 754 | 0.934 | 0.796 | 0.754 | 0.828 | 0.741 |
| 755 | 0.922 | 0.783 | 0.749 | 0.817 | 0.726 |
| 756 | 0.942 | 0.804 | 0.763 | 0.836 | 0.754 |
| 757 | 0.908 | 0.804 | 0.763 | 0.825 | 0.737 |
| 758 | 0.913 | 0.775 | 0.763 | 0.816 | 0.725 |
| 759 | 0.916 | 0.778 | 0.728 | 0.807 | 0.710 |

|     |       |       |       |       |       |
|-----|-------|-------|-------|-------|-------|
| 760 | 0.934 | 0.757 | 0.751 | 0.813 | 0.719 |
| 761 | 0.902 | 0.780 | 0.722 | 0.801 | 0.702 |
| 762 | 0.925 | 0.793 | 0.731 | 0.816 | 0.724 |
| 763 | 0.919 | 0.783 | 0.757 | 0.819 | 0.729 |
| 764 | 0.919 | 0.752 | 0.725 | 0.798 | 0.696 |
| 765 | 0.922 | 0.796 | 0.728 | 0.815 | 0.722 |
| 766 | 0.916 | 0.755 | 0.725 | 0.798 | 0.696 |
| 767 | 0.928 | 0.798 | 0.731 | 0.819 | 0.728 |
| 768 | 0.922 | 0.796 | 0.760 | 0.826 | 0.738 |
| 769 | 0.922 | 0.801 | 0.716 | 0.813 | 0.720 |
| 770 | 0.916 | 0.783 | 0.737 | 0.812 | 0.717 |
| 771 | 0.908 | 0.809 | 0.716 | 0.812 | 0.717 |
| 772 | 0.913 | 0.775 | 0.731 | 0.806 | 0.709 |
| 773 | 0.925 | 0.767 | 0.778 | 0.822 | 0.734 |
| 774 | 0.910 | 0.778 | 0.743 | 0.810 | 0.714 |
| 775 | 0.925 | 0.775 | 0.731 | 0.810 | 0.714 |
| 776 | 0.925 | 0.796 | 0.743 | 0.821 | 0.731 |
| 777 | 0.916 | 0.809 | 0.737 | 0.821 | 0.731 |
| 778 | 0.922 | 0.778 | 0.722 | 0.807 | 0.710 |
| 779 | 0.934 | 0.780 | 0.769 | 0.827 | 0.740 |
| 780 | 0.910 | 0.786 | 0.725 | 0.807 | 0.710 |
| 781 | 0.916 | 0.778 | 0.760 | 0.817 | 0.726 |
| 782 | 0.899 | 0.773 | 0.751 | 0.807 | 0.711 |
| 783 | 0.928 | 0.801 | 0.713 | 0.814 | 0.721 |
| 784 | 0.913 | 0.793 | 0.760 | 0.822 | 0.733 |
| 785 | 0.919 | 0.791 | 0.725 | 0.812 | 0.717 |
| 786 | 0.916 | 0.783 | 0.740 | 0.813 | 0.719 |
| 787 | 0.913 | 0.822 | 0.749 | 0.828 | 0.742 |
| 788 | 0.905 | 0.767 | 0.734 | 0.801 | 0.702 |

**SHAP by lightGBM**

| <b>Numbers of features</b> | <b>G1</b> | <b>G2/M</b> | <b>S</b> | <b>ACC</b> | <b>MCC</b> |
|----------------------------|-----------|-------------|----------|------------|------------|
| 1                          | 0.913     | 0.638       | 0.554    | 0.701      | 0.551      |
| 2                          | 0.942     | 0.698       | 0.635    | 0.757      | 0.635      |
| 3                          | 0.928     | 0.721       | 0.611    | 0.754      | 0.629      |
| 4                          | 0.931     | 0.752       | 0.689    | 0.790      | 0.685      |
| 5                          | 0.931     | 0.718       | 0.704    | 0.783      | 0.674      |
| 6                          | 0.942     | 0.770       | 0.728    | 0.813      | 0.719      |
| 7                          | 0.919     | 0.827       | 0.763    | 0.837      | 0.755      |
| 8                          | 0.908     | 0.832       | 0.763    | 0.835      | 0.752      |
| 9                          | 0.931     | 0.801       | 0.790    | 0.840      | 0.760      |
| 10                         | 0.922     | 0.788       | 0.751    | 0.820      | 0.730      |
| 11                         | 0.922     | 0.796       | 0.751    | 0.823      | 0.734      |

|    |       |       |       |       |       |
|----|-------|-------|-------|-------|-------|
| 12 | 0.913 | 0.798 | 0.775 | 0.828 | 0.743 |
| 13 | 0.908 | 0.793 | 0.754 | 0.818 | 0.727 |
| 14 | 0.931 | 0.801 | 0.746 | 0.826 | 0.738 |
| 15 | 0.913 | 0.791 | 0.790 | 0.830 | 0.746 |
| 16 | 0.902 | 0.814 | 0.769 | 0.828 | 0.743 |
| 17 | 0.919 | 0.809 | 0.763 | 0.830 | 0.745 |
| 18 | 0.925 | 0.814 | 0.760 | 0.833 | 0.749 |
| 19 | 0.934 | 0.775 | 0.772 | 0.826 | 0.739 |
| 20 | 0.919 | 0.765 | 0.728 | 0.803 | 0.705 |
| 21 | 0.925 | 0.786 | 0.749 | 0.819 | 0.729 |
| 22 | 0.931 | 0.801 | 0.772 | 0.834 | 0.751 |
| 23 | 0.939 | 0.755 | 0.766 | 0.818 | 0.728 |
| 24 | 0.931 | 0.773 | 0.778 | 0.826 | 0.739 |
| 25 | 0.934 | 0.822 | 0.737 | 0.831 | 0.746 |
| 26 | 0.928 | 0.811 | 0.790 | 0.843 | 0.764 |
| 27 | 0.951 | 0.788 | 0.760 | 0.832 | 0.748 |
| 28 | 0.928 | 0.827 | 0.781 | 0.845 | 0.768 |
| 29 | 0.905 | 0.809 | 0.757 | 0.824 | 0.735 |
| 30 | 0.919 | 0.786 | 0.793 | 0.831 | 0.748 |
| 31 | 0.925 | 0.791 | 0.746 | 0.820 | 0.730 |
| 32 | 0.919 | 0.817 | 0.766 | 0.834 | 0.751 |
| 33 | 0.922 | 0.778 | 0.749 | 0.815 | 0.723 |
| 34 | 0.934 | 0.783 | 0.757 | 0.824 | 0.736 |
| 35 | 0.931 | 0.840 | 0.743 | 0.839 | 0.758 |
| 36 | 0.936 | 0.824 | 0.746 | 0.836 | 0.753 |
| 37 | 0.919 | 0.806 | 0.766 | 0.830 | 0.745 |
| 38 | 0.922 | 0.835 | 0.731 | 0.830 | 0.745 |
| 39 | 0.936 | 0.827 | 0.769 | 0.844 | 0.766 |
| 40 | 0.908 | 0.814 | 0.749 | 0.824 | 0.735 |
| 41 | 0.916 | 0.835 | 0.763 | 0.839 | 0.758 |
| 42 | 0.939 | 0.819 | 0.749 | 0.836 | 0.753 |
| 43 | 0.925 | 0.829 | 0.784 | 0.846 | 0.769 |
| 44 | 0.925 | 0.793 | 0.737 | 0.818 | 0.727 |
| 45 | 0.928 | 0.824 | 0.746 | 0.833 | 0.749 |
| 46 | 0.925 | 0.822 | 0.769 | 0.839 | 0.758 |
| 47 | 0.919 | 0.817 | 0.746 | 0.828 | 0.741 |
| 48 | 0.931 | 0.806 | 0.754 | 0.830 | 0.745 |
| 49 | 0.913 | 0.814 | 0.754 | 0.828 | 0.741 |
| 50 | 0.934 | 0.791 | 0.728 | 0.817 | 0.725 |
| 51 | 0.936 | 0.827 | 0.760 | 0.842 | 0.762 |
| 52 | 0.919 | 0.845 | 0.746 | 0.838 | 0.756 |
| 53 | 0.925 | 0.809 | 0.769 | 0.834 | 0.751 |

|    |       |       |       |       |       |
|----|-------|-------|-------|-------|-------|
| 54 | 0.922 | 0.809 | 0.763 | 0.831 | 0.747 |
| 55 | 0.934 | 0.811 | 0.760 | 0.835 | 0.752 |
| 56 | 0.922 | 0.809 | 0.719 | 0.817 | 0.725 |
| 57 | 0.925 | 0.824 | 0.737 | 0.829 | 0.744 |
| 58 | 0.919 | 0.804 | 0.737 | 0.820 | 0.730 |
| 59 | 0.908 | 0.829 | 0.734 | 0.825 | 0.736 |
| 60 | 0.919 | 0.824 | 0.763 | 0.836 | 0.754 |
| 61 | 0.908 | 0.804 | 0.760 | 0.824 | 0.736 |
| 62 | 0.928 | 0.814 | 0.775 | 0.839 | 0.758 |
| 63 | 0.916 | 0.817 | 0.754 | 0.829 | 0.744 |
| 64 | 0.908 | 0.822 | 0.763 | 0.831 | 0.747 |
| 65 | 0.910 | 0.824 | 0.769 | 0.835 | 0.752 |
| 66 | 0.928 | 0.824 | 0.766 | 0.840 | 0.759 |
| 67 | 0.913 | 0.827 | 0.787 | 0.843 | 0.764 |
| 68 | 0.925 | 0.829 | 0.772 | 0.843 | 0.763 |
| 69 | 0.916 | 0.809 | 0.749 | 0.825 | 0.737 |
| 70 | 0.925 | 0.824 | 0.731 | 0.828 | 0.741 |
| 71 | 0.908 | 0.809 | 0.769 | 0.828 | 0.742 |
| 72 | 0.934 | 0.842 | 0.740 | 0.840 | 0.759 |
| 73 | 0.908 | 0.798 | 0.754 | 0.820 | 0.730 |
| 74 | 0.908 | 0.775 | 0.751 | 0.811 | 0.716 |
| 75 | 0.928 | 0.840 | 0.781 | 0.850 | 0.775 |
| 76 | 0.922 | 0.848 | 0.796 | 0.856 | 0.783 |
| 77 | 0.916 | 0.791 | 0.751 | 0.819 | 0.728 |
| 78 | 0.913 | 0.819 | 0.781 | 0.838 | 0.757 |
| 79 | 0.910 | 0.814 | 0.772 | 0.832 | 0.748 |
| 80 | 0.922 | 0.788 | 0.760 | 0.823 | 0.734 |
| 81 | 0.916 | 0.811 | 0.763 | 0.830 | 0.745 |
| 82 | 0.934 | 0.827 | 0.784 | 0.848 | 0.772 |
| 83 | 0.931 | 0.814 | 0.778 | 0.841 | 0.761 |
| 84 | 0.931 | 0.817 | 0.749 | 0.832 | 0.748 |
| 85 | 0.905 | 0.814 | 0.775 | 0.831 | 0.747 |
| 86 | 0.919 | 0.827 | 0.778 | 0.842 | 0.762 |
| 87 | 0.934 | 0.809 | 0.778 | 0.840 | 0.760 |
| 88 | 0.908 | 0.835 | 0.754 | 0.833 | 0.749 |
| 89 | 0.908 | 0.804 | 0.781 | 0.830 | 0.746 |
| 90 | 0.908 | 0.827 | 0.766 | 0.834 | 0.751 |
| 91 | 0.908 | 0.822 | 0.781 | 0.837 | 0.755 |
| 92 | 0.913 | 0.822 | 0.784 | 0.840 | 0.759 |
| 93 | 0.908 | 0.832 | 0.763 | 0.835 | 0.752 |
| 94 | 0.928 | 0.796 | 0.754 | 0.826 | 0.738 |
| 95 | 0.931 | 0.780 | 0.749 | 0.819 | 0.729 |



|     |       |       |       |       |       |
|-----|-------|-------|-------|-------|-------|
| 96  | 0.905 | 0.804 | 0.754 | 0.821 | 0.731 |
| 97  | 0.919 | 0.822 | 0.763 | 0.835 | 0.752 |
| 98  | 0.919 | 0.796 | 0.766 | 0.827 | 0.740 |
| 99  | 0.896 | 0.809 | 0.743 | 0.816 | 0.724 |
| 100 | 0.902 | 0.837 | 0.784 | 0.842 | 0.762 |
| 101 | 0.919 | 0.809 | 0.751 | 0.827 | 0.740 |
| 102 | 0.910 | 0.837 | 0.793 | 0.847 | 0.771 |
| 103 | 0.913 | 0.822 | 0.835 | 0.856 | 0.784 |
| 104 | 0.934 | 0.811 | 0.772 | 0.839 | 0.758 |
| 105 | 0.922 | 0.832 | 0.796 | 0.850 | 0.775 |
| 106 | 0.913 | 0.791 | 0.740 | 0.814 | 0.721 |
| 107 | 0.913 | 0.845 | 0.793 | 0.851 | 0.776 |
| 108 | 0.916 | 0.822 | 0.775 | 0.838 | 0.756 |
| 109 | 0.922 | 0.801 | 0.775 | 0.832 | 0.748 |
| 110 | 0.934 | 0.817 | 0.760 | 0.837 | 0.755 |
| 111 | 0.922 | 0.814 | 0.757 | 0.831 | 0.747 |
| 112 | 0.922 | 0.773 | 0.796 | 0.828 | 0.744 |
| 113 | 0.910 | 0.817 | 0.751 | 0.827 | 0.739 |
| 114 | 0.913 | 0.765 | 0.781 | 0.818 | 0.728 |
| 115 | 0.913 | 0.827 | 0.760 | 0.834 | 0.751 |
| 116 | 0.908 | 0.832 | 0.784 | 0.842 | 0.762 |
| 117 | 0.910 | 0.814 | 0.784 | 0.836 | 0.754 |
| 118 | 0.916 | 0.837 | 0.784 | 0.846 | 0.769 |
| 119 | 0.896 | 0.811 | 0.731 | 0.813 | 0.720 |
| 120 | 0.910 | 0.835 | 0.760 | 0.836 | 0.753 |
| 121 | 0.908 | 0.804 | 0.802 | 0.837 | 0.756 |
| 122 | 0.922 | 0.780 | 0.749 | 0.816 | 0.724 |
| 123 | 0.905 | 0.793 | 0.763 | 0.820 | 0.730 |
| 124 | 0.899 | 0.801 | 0.796 | 0.831 | 0.747 |
| 125 | 0.910 | 0.829 | 0.775 | 0.839 | 0.758 |
| 126 | 0.905 | 0.801 | 0.781 | 0.828 | 0.743 |
| 127 | 0.910 | 0.832 | 0.772 | 0.839 | 0.758 |
| 128 | 0.934 | 0.804 | 0.784 | 0.840 | 0.760 |
| 129 | 0.916 | 0.824 | 0.787 | 0.843 | 0.764 |
| 130 | 0.922 | 0.780 | 0.757 | 0.819 | 0.729 |
| 131 | 0.922 | 0.824 | 0.769 | 0.839 | 0.758 |
| 132 | 0.928 | 0.798 | 0.728 | 0.818 | 0.727 |
| 133 | 0.925 | 0.778 | 0.757 | 0.819 | 0.729 |
| 134 | 0.910 | 0.822 | 0.766 | 0.833 | 0.749 |
| 135 | 0.896 | 0.832 | 0.731 | 0.821 | 0.731 |
| 136 | 0.896 | 0.822 | 0.781 | 0.833 | 0.750 |
| 137 | 0.916 | 0.837 | 0.793 | 0.849 | 0.773 |

|     |       |       |       |       |       |
|-----|-------|-------|-------|-------|-------|
| 138 | 0.913 | 0.814 | 0.760 | 0.829 | 0.744 |
| 139 | 0.899 | 0.796 | 0.746 | 0.813 | 0.720 |
| 140 | 0.931 | 0.814 | 0.778 | 0.841 | 0.761 |
| 141 | 0.908 | 0.827 | 0.766 | 0.834 | 0.751 |
| 142 | 0.913 | 0.837 | 0.772 | 0.842 | 0.762 |
| 143 | 0.916 | 0.829 | 0.757 | 0.835 | 0.752 |
| 144 | 0.928 | 0.837 | 0.769 | 0.845 | 0.768 |
| 145 | 0.913 | 0.845 | 0.784 | 0.848 | 0.772 |
| 146 | 0.922 | 0.829 | 0.772 | 0.842 | 0.762 |
| 147 | 0.902 | 0.806 | 0.754 | 0.821 | 0.731 |
| 148 | 0.893 | 0.824 | 0.757 | 0.826 | 0.738 |
| 149 | 0.908 | 0.806 | 0.784 | 0.832 | 0.748 |
| 150 | 0.928 | 0.835 | 0.760 | 0.842 | 0.762 |
| 151 | 0.919 | 0.848 | 0.763 | 0.844 | 0.766 |
| 152 | 0.931 | 0.809 | 0.737 | 0.826 | 0.738 |
| 153 | 0.910 | 0.829 | 0.787 | 0.843 | 0.764 |
| 154 | 0.925 | 0.832 | 0.772 | 0.843 | 0.765 |
| 155 | 0.922 | 0.798 | 0.754 | 0.825 | 0.737 |
| 156 | 0.908 | 0.819 | 0.763 | 0.830 | 0.745 |
| 157 | 0.902 | 0.814 | 0.769 | 0.828 | 0.743 |
| 158 | 0.908 | 0.835 | 0.734 | 0.827 | 0.739 |
| 159 | 0.913 | 0.832 | 0.743 | 0.830 | 0.745 |
| 160 | 0.916 | 0.819 | 0.760 | 0.832 | 0.748 |
| 161 | 0.916 | 0.814 | 0.775 | 0.835 | 0.752 |
| 162 | 0.902 | 0.804 | 0.743 | 0.816 | 0.724 |
| 163 | 0.899 | 0.832 | 0.760 | 0.831 | 0.746 |
| 164 | 0.902 | 0.822 | 0.731 | 0.819 | 0.728 |
| 165 | 0.905 | 0.804 | 0.760 | 0.823 | 0.734 |
| 166 | 0.919 | 0.796 | 0.769 | 0.828 | 0.741 |
| 167 | 0.913 | 0.824 | 0.763 | 0.834 | 0.751 |
| 168 | 0.908 | 0.796 | 0.751 | 0.818 | 0.727 |
| 169 | 0.922 | 0.824 | 0.754 | 0.834 | 0.751 |
| 170 | 0.905 | 0.829 | 0.751 | 0.829 | 0.744 |
| 171 | 0.916 | 0.827 | 0.760 | 0.835 | 0.752 |
| 172 | 0.919 | 0.804 | 0.766 | 0.829 | 0.744 |
| 173 | 0.910 | 0.845 | 0.772 | 0.843 | 0.765 |
| 174 | 0.905 | 0.827 | 0.766 | 0.833 | 0.749 |
| 175 | 0.916 | 0.842 | 0.772 | 0.844 | 0.766 |
| 176 | 0.925 | 0.817 | 0.757 | 0.833 | 0.749 |
| 177 | 0.925 | 0.804 | 0.743 | 0.824 | 0.735 |
| 178 | 0.902 | 0.806 | 0.740 | 0.816 | 0.724 |
| 179 | 0.908 | 0.804 | 0.760 | 0.824 | 0.736 |

|     |       |       |       |       |       |
|-----|-------|-------|-------|-------|-------|
| 180 | 0.908 | 0.832 | 0.743 | 0.828 | 0.742 |
| 181 | 0.905 | 0.817 | 0.763 | 0.828 | 0.742 |
| 182 | 0.925 | 0.832 | 0.766 | 0.842 | 0.762 |
| 183 | 0.913 | 0.814 | 0.775 | 0.834 | 0.751 |
| 184 | 0.919 | 0.809 | 0.796 | 0.841 | 0.761 |
| 185 | 0.916 | 0.811 | 0.778 | 0.835 | 0.752 |
| 186 | 0.902 | 0.832 | 0.778 | 0.838 | 0.756 |
| 187 | 0.905 | 0.804 | 0.772 | 0.827 | 0.740 |
| 188 | 0.893 | 0.819 | 0.749 | 0.821 | 0.731 |
| 189 | 0.882 | 0.822 | 0.796 | 0.833 | 0.750 |
| 190 | 0.913 | 0.814 | 0.716 | 0.815 | 0.722 |
| 191 | 0.913 | 0.801 | 0.731 | 0.815 | 0.723 |
| 192 | 0.905 | 0.798 | 0.778 | 0.827 | 0.740 |
| 193 | 0.919 | 0.829 | 0.760 | 0.837 | 0.755 |
| 194 | 0.908 | 0.832 | 0.746 | 0.829 | 0.744 |
| 195 | 0.899 | 0.791 | 0.757 | 0.815 | 0.723 |
| 196 | 0.913 | 0.780 | 0.746 | 0.813 | 0.719 |
| 197 | 0.922 | 0.837 | 0.790 | 0.850 | 0.775 |
| 198 | 0.902 | 0.819 | 0.778 | 0.833 | 0.750 |
| 199 | 0.902 | 0.783 | 0.746 | 0.810 | 0.714 |
| 200 | 0.916 | 0.817 | 0.769 | 0.834 | 0.751 |
| 201 | 0.936 | 0.752 | 0.743 | 0.809 | 0.713 |
| 202 | 0.916 | 0.829 | 0.760 | 0.836 | 0.754 |
| 203 | 0.899 | 0.817 | 0.749 | 0.822 | 0.732 |
| 204 | 0.896 | 0.801 | 0.737 | 0.812 | 0.717 |
| 205 | 0.902 | 0.819 | 0.760 | 0.828 | 0.741 |
| 206 | 0.910 | 0.819 | 0.743 | 0.825 | 0.737 |
| 207 | 0.910 | 0.824 | 0.787 | 0.841 | 0.761 |
| 208 | 0.916 | 0.783 | 0.728 | 0.809 | 0.713 |
| 209 | 0.919 | 0.829 | 0.754 | 0.835 | 0.752 |
| 210 | 0.913 | 0.814 | 0.760 | 0.829 | 0.744 |
| 211 | 0.890 | 0.796 | 0.754 | 0.813 | 0.720 |
| 212 | 0.890 | 0.804 | 0.760 | 0.818 | 0.727 |
| 213 | 0.899 | 0.806 | 0.766 | 0.824 | 0.736 |
| 214 | 0.899 | 0.786 | 0.763 | 0.815 | 0.723 |
| 215 | 0.910 | 0.804 | 0.743 | 0.819 | 0.728 |
| 216 | 0.928 | 0.798 | 0.754 | 0.827 | 0.740 |
| 217 | 0.905 | 0.822 | 0.757 | 0.828 | 0.742 |
| 218 | 0.913 | 0.829 | 0.772 | 0.839 | 0.758 |
| 219 | 0.908 | 0.793 | 0.763 | 0.821 | 0.731 |
| 220 | 0.913 | 0.829 | 0.740 | 0.828 | 0.742 |
| 221 | 0.928 | 0.801 | 0.775 | 0.834 | 0.751 |

|     |       |       |       |       |       |
|-----|-------|-------|-------|-------|-------|
| 222 | 0.908 | 0.804 | 0.722 | 0.812 | 0.717 |
| 223 | 0.910 | 0.806 | 0.787 | 0.834 | 0.751 |
| 224 | 0.908 | 0.835 | 0.749 | 0.831 | 0.746 |
| 225 | 0.916 | 0.817 | 0.757 | 0.830 | 0.745 |
| 226 | 0.902 | 0.775 | 0.772 | 0.815 | 0.724 |
| 227 | 0.922 | 0.835 | 0.743 | 0.834 | 0.751 |
| 228 | 0.922 | 0.783 | 0.775 | 0.826 | 0.739 |
| 229 | 0.916 | 0.811 | 0.778 | 0.835 | 0.753 |
| 230 | 0.919 | 0.788 | 0.731 | 0.813 | 0.718 |
| 231 | 0.893 | 0.801 | 0.754 | 0.816 | 0.724 |
| 232 | 0.908 | 0.842 | 0.763 | 0.839 | 0.758 |
| 233 | 0.922 | 0.822 | 0.775 | 0.840 | 0.759 |
| 234 | 0.902 | 0.801 | 0.754 | 0.819 | 0.728 |
| 235 | 0.910 | 0.798 | 0.740 | 0.816 | 0.724 |
| 236 | 0.908 | 0.837 | 0.760 | 0.836 | 0.753 |
| 237 | 0.908 | 0.796 | 0.766 | 0.823 | 0.735 |
| 238 | 0.913 | 0.817 | 0.781 | 0.837 | 0.755 |
| 239 | 0.913 | 0.804 | 0.763 | 0.827 | 0.740 |
| 240 | 0.919 | 0.809 | 0.763 | 0.830 | 0.745 |
| 241 | 0.916 | 0.824 | 0.737 | 0.827 | 0.739 |
| 242 | 0.896 | 0.796 | 0.769 | 0.820 | 0.730 |
| 243 | 0.905 | 0.811 | 0.760 | 0.826 | 0.738 |
| 244 | 0.916 | 0.811 | 0.722 | 0.817 | 0.725 |
| 245 | 0.916 | 0.788 | 0.751 | 0.818 | 0.727 |
| 246 | 0.919 | 0.842 | 0.754 | 0.840 | 0.759 |
| 247 | 0.910 | 0.804 | 0.769 | 0.828 | 0.741 |
| 248 | 0.905 | 0.806 | 0.757 | 0.823 | 0.734 |
| 249 | 0.931 | 0.786 | 0.751 | 0.822 | 0.733 |
| 250 | 0.928 | 0.801 | 0.743 | 0.824 | 0.735 |
| 251 | 0.919 | 0.817 | 0.766 | 0.834 | 0.751 |
| 252 | 0.919 | 0.796 | 0.737 | 0.817 | 0.726 |
| 253 | 0.905 | 0.806 | 0.787 | 0.832 | 0.748 |
| 254 | 0.913 | 0.798 | 0.757 | 0.823 | 0.734 |
| 255 | 0.893 | 0.798 | 0.760 | 0.817 | 0.726 |
| 256 | 0.905 | 0.793 | 0.775 | 0.824 | 0.736 |
| 257 | 0.884 | 0.786 | 0.746 | 0.805 | 0.708 |
| 258 | 0.922 | 0.783 | 0.775 | 0.826 | 0.739 |
| 259 | 0.910 | 0.811 | 0.740 | 0.821 | 0.731 |
| 260 | 0.916 | 0.780 | 0.743 | 0.813 | 0.719 |
| 261 | 0.905 | 0.809 | 0.784 | 0.832 | 0.748 |
| 262 | 0.908 | 0.798 | 0.760 | 0.822 | 0.733 |
| 263 | 0.919 | 0.811 | 0.737 | 0.823 | 0.734 |

|     |       |       |       |       |       |
|-----|-------|-------|-------|-------|-------|
| 264 | 0.908 | 0.801 | 0.781 | 0.829 | 0.744 |
| 265 | 0.913 | 0.798 | 0.743 | 0.818 | 0.727 |
| 266 | 0.887 | 0.804 | 0.778 | 0.823 | 0.734 |
| 267 | 0.913 | 0.850 | 0.778 | 0.848 | 0.772 |
| 268 | 0.887 | 0.788 | 0.731 | 0.802 | 0.703 |
| 269 | 0.919 | 0.801 | 0.772 | 0.830 | 0.745 |
| 270 | 0.887 | 0.788 | 0.769 | 0.814 | 0.722 |
| 271 | 0.913 | 0.817 | 0.760 | 0.830 | 0.745 |
| 272 | 0.908 | 0.773 | 0.769 | 0.815 | 0.724 |
| 273 | 0.896 | 0.814 | 0.713 | 0.809 | 0.713 |
| 274 | 0.934 | 0.817 | 0.760 | 0.837 | 0.755 |
| 275 | 0.916 | 0.798 | 0.740 | 0.818 | 0.727 |
| 276 | 0.905 | 0.780 | 0.716 | 0.800 | 0.700 |
| 277 | 0.910 | 0.780 | 0.769 | 0.819 | 0.729 |
| 278 | 0.913 | 0.814 | 0.784 | 0.837 | 0.755 |
| 279 | 0.916 | 0.801 | 0.749 | 0.822 | 0.733 |
| 280 | 0.919 | 0.817 | 0.754 | 0.830 | 0.745 |
| 281 | 0.890 | 0.809 | 0.731 | 0.811 | 0.716 |
| 282 | 0.922 | 0.814 | 0.760 | 0.832 | 0.748 |
| 283 | 0.910 | 0.822 | 0.743 | 0.826 | 0.738 |
| 284 | 0.913 | 0.806 | 0.784 | 0.834 | 0.751 |
| 285 | 0.896 | 0.824 | 0.757 | 0.827 | 0.740 |
| 286 | 0.928 | 0.804 | 0.760 | 0.830 | 0.745 |
| 287 | 0.910 | 0.791 | 0.763 | 0.821 | 0.731 |
| 288 | 0.916 | 0.804 | 0.760 | 0.827 | 0.740 |
| 289 | 0.913 | 0.827 | 0.769 | 0.837 | 0.755 |
| 290 | 0.928 | 0.783 | 0.749 | 0.819 | 0.729 |
| 291 | 0.896 | 0.770 | 0.728 | 0.798 | 0.696 |
| 292 | 0.925 | 0.773 | 0.746 | 0.813 | 0.720 |
| 293 | 0.908 | 0.824 | 0.769 | 0.834 | 0.751 |
| 294 | 0.902 | 0.775 | 0.754 | 0.810 | 0.715 |
| 295 | 0.908 | 0.796 | 0.737 | 0.813 | 0.720 |
| 296 | 0.879 | 0.827 | 0.754 | 0.821 | 0.731 |
| 297 | 0.916 | 0.824 | 0.731 | 0.825 | 0.736 |
| 298 | 0.905 | 0.778 | 0.757 | 0.813 | 0.719 |
| 299 | 0.902 | 0.814 | 0.781 | 0.832 | 0.749 |
| 300 | 0.925 | 0.809 | 0.754 | 0.829 | 0.744 |
| 301 | 0.899 | 0.786 | 0.746 | 0.810 | 0.714 |
| 302 | 0.910 | 0.798 | 0.763 | 0.824 | 0.735 |
| 303 | 0.925 | 0.811 | 0.757 | 0.831 | 0.747 |
| 304 | 0.887 | 0.801 | 0.769 | 0.819 | 0.729 |
| 305 | 0.913 | 0.822 | 0.769 | 0.835 | 0.752 |

|     |       |       |       |       |       |
|-----|-------|-------|-------|-------|-------|
| 306 | 0.913 | 0.806 | 0.778 | 0.832 | 0.748 |
| 307 | 0.902 | 0.801 | 0.763 | 0.822 | 0.733 |
| 308 | 0.910 | 0.814 | 0.751 | 0.826 | 0.738 |
| 309 | 0.902 | 0.796 | 0.754 | 0.817 | 0.726 |
| 310 | 0.905 | 0.786 | 0.746 | 0.812 | 0.717 |
| 311 | 0.922 | 0.811 | 0.781 | 0.838 | 0.757 |
| 312 | 0.910 | 0.767 | 0.766 | 0.813 | 0.721 |
| 313 | 0.913 | 0.842 | 0.766 | 0.842 | 0.762 |
| 314 | 0.910 | 0.804 | 0.769 | 0.828 | 0.741 |
| 315 | 0.910 | 0.817 | 0.769 | 0.832 | 0.748 |
| 316 | 0.908 | 0.775 | 0.740 | 0.807 | 0.710 |
| 317 | 0.910 | 0.811 | 0.790 | 0.837 | 0.755 |
| 318 | 0.896 | 0.806 | 0.769 | 0.824 | 0.736 |
| 319 | 0.913 | 0.817 | 0.775 | 0.835 | 0.752 |
| 320 | 0.913 | 0.796 | 0.743 | 0.817 | 0.725 |
| 321 | 0.919 | 0.809 | 0.751 | 0.827 | 0.740 |
| 322 | 0.910 | 0.796 | 0.751 | 0.819 | 0.729 |
| 323 | 0.905 | 0.804 | 0.740 | 0.816 | 0.724 |
| 324 | 0.902 | 0.780 | 0.749 | 0.810 | 0.714 |
| 325 | 0.922 | 0.778 | 0.754 | 0.817 | 0.726 |
| 326 | 0.922 | 0.809 | 0.772 | 0.834 | 0.751 |
| 327 | 0.890 | 0.786 | 0.722 | 0.799 | 0.699 |
| 328 | 0.916 | 0.749 | 0.772 | 0.811 | 0.717 |
| 329 | 0.899 | 0.801 | 0.749 | 0.816 | 0.724 |
| 330 | 0.899 | 0.762 | 0.743 | 0.800 | 0.701 |
| 331 | 0.913 | 0.801 | 0.775 | 0.829 | 0.744 |
| 332 | 0.905 | 0.793 | 0.757 | 0.818 | 0.727 |
| 333 | 0.913 | 0.788 | 0.746 | 0.815 | 0.723 |
| 334 | 0.908 | 0.827 | 0.740 | 0.826 | 0.738 |
| 335 | 0.916 | 0.814 | 0.766 | 0.832 | 0.748 |
| 336 | 0.916 | 0.757 | 0.757 | 0.809 | 0.713 |
| 337 | 0.916 | 0.775 | 0.731 | 0.807 | 0.710 |
| 338 | 0.925 | 0.804 | 0.757 | 0.828 | 0.742 |
| 339 | 0.908 | 0.822 | 0.734 | 0.822 | 0.732 |
| 340 | 0.896 | 0.809 | 0.754 | 0.820 | 0.730 |
| 341 | 0.913 | 0.809 | 0.757 | 0.827 | 0.740 |
| 342 | 0.919 | 0.806 | 0.760 | 0.828 | 0.743 |
| 343 | 0.899 | 0.819 | 0.746 | 0.822 | 0.732 |
| 344 | 0.908 | 0.793 | 0.746 | 0.815 | 0.723 |
| 345 | 0.910 | 0.801 | 0.731 | 0.814 | 0.721 |
| 346 | 0.910 | 0.811 | 0.707 | 0.811 | 0.715 |
| 347 | 0.913 | 0.811 | 0.754 | 0.827 | 0.740 |

|     |       |       |       |       |       |
|-----|-------|-------|-------|-------|-------|
| 348 | 0.925 | 0.780 | 0.769 | 0.824 | 0.736 |
| 349 | 0.890 | 0.793 | 0.746 | 0.810 | 0.714 |
| 350 | 0.899 | 0.796 | 0.737 | 0.811 | 0.716 |
| 351 | 0.910 | 0.783 | 0.737 | 0.810 | 0.714 |
| 352 | 0.910 | 0.817 | 0.749 | 0.826 | 0.738 |
| 353 | 0.916 | 0.775 | 0.719 | 0.803 | 0.705 |
| 354 | 0.908 | 0.793 | 0.710 | 0.804 | 0.706 |
| 355 | 0.916 | 0.817 | 0.746 | 0.827 | 0.739 |
| 356 | 0.913 | 0.804 | 0.766 | 0.828 | 0.741 |
| 357 | 0.905 | 0.811 | 0.743 | 0.820 | 0.730 |
| 358 | 0.908 | 0.749 | 0.734 | 0.796 | 0.694 |
| 359 | 0.893 | 0.755 | 0.763 | 0.802 | 0.704 |
| 360 | 0.913 | 0.819 | 0.751 | 0.828 | 0.742 |
| 361 | 0.925 | 0.798 | 0.766 | 0.829 | 0.744 |
| 362 | 0.899 | 0.811 | 0.781 | 0.830 | 0.746 |
| 363 | 0.908 | 0.798 | 0.775 | 0.827 | 0.740 |
| 364 | 0.925 | 0.798 | 0.772 | 0.831 | 0.747 |
| 365 | 0.910 | 0.786 | 0.740 | 0.812 | 0.717 |
| 366 | 0.908 | 0.798 | 0.728 | 0.812 | 0.717 |
| 367 | 0.905 | 0.798 | 0.754 | 0.819 | 0.728 |
| 368 | 0.919 | 0.788 | 0.737 | 0.814 | 0.721 |
| 369 | 0.910 | 0.817 | 0.740 | 0.823 | 0.734 |
| 370 | 0.916 | 0.788 | 0.757 | 0.820 | 0.730 |
| 371 | 0.899 | 0.783 | 0.749 | 0.810 | 0.714 |
| 372 | 0.919 | 0.801 | 0.740 | 0.820 | 0.730 |
| 373 | 0.905 | 0.775 | 0.746 | 0.808 | 0.712 |
| 374 | 0.925 | 0.796 | 0.725 | 0.815 | 0.723 |
| 375 | 0.908 | 0.796 | 0.746 | 0.816 | 0.724 |
| 376 | 0.928 | 0.827 | 0.725 | 0.828 | 0.741 |
| 377 | 0.936 | 0.788 | 0.749 | 0.824 | 0.736 |
| 378 | 0.910 | 0.788 | 0.751 | 0.816 | 0.724 |
| 379 | 0.908 | 0.801 | 0.746 | 0.818 | 0.727 |
| 380 | 0.913 | 0.788 | 0.749 | 0.816 | 0.724 |
| 381 | 0.913 | 0.801 | 0.778 | 0.830 | 0.745 |
| 382 | 0.908 | 0.783 | 0.757 | 0.815 | 0.723 |
| 383 | 0.908 | 0.814 | 0.716 | 0.813 | 0.720 |
| 384 | 0.910 | 0.788 | 0.757 | 0.818 | 0.727 |
| 385 | 0.919 | 0.801 | 0.757 | 0.826 | 0.738 |
| 386 | 0.893 | 0.767 | 0.704 | 0.788 | 0.682 |
| 387 | 0.916 | 0.809 | 0.766 | 0.830 | 0.745 |
| 388 | 0.916 | 0.814 | 0.757 | 0.829 | 0.744 |
| 389 | 0.908 | 0.793 | 0.740 | 0.813 | 0.720 |

|     |       |       |       |       |       |
|-----|-------|-------|-------|-------|-------|
| 390 | 0.902 | 0.798 | 0.740 | 0.813 | 0.720 |
| 391 | 0.896 | 0.770 | 0.754 | 0.806 | 0.709 |
| 392 | 0.910 | 0.798 | 0.743 | 0.817 | 0.725 |
| 393 | 0.931 | 0.791 | 0.731 | 0.817 | 0.725 |
| 394 | 0.913 | 0.788 | 0.763 | 0.821 | 0.731 |
| 395 | 0.913 | 0.822 | 0.743 | 0.827 | 0.739 |
| 396 | 0.919 | 0.778 | 0.737 | 0.811 | 0.716 |
| 397 | 0.896 | 0.765 | 0.746 | 0.801 | 0.702 |
| 398 | 0.931 | 0.819 | 0.749 | 0.833 | 0.749 |
| 399 | 0.908 | 0.796 | 0.716 | 0.807 | 0.710 |
| 400 | 0.913 | 0.780 | 0.751 | 0.814 | 0.722 |
| 401 | 0.934 | 0.788 | 0.757 | 0.826 | 0.738 |
| 402 | 0.934 | 0.783 | 0.740 | 0.818 | 0.727 |
| 403 | 0.910 | 0.791 | 0.749 | 0.816 | 0.724 |
| 404 | 0.919 | 0.804 | 0.740 | 0.821 | 0.731 |
| 405 | 0.908 | 0.783 | 0.757 | 0.815 | 0.723 |
| 406 | 0.908 | 0.780 | 0.713 | 0.800 | 0.700 |
| 407 | 0.910 | 0.736 | 0.731 | 0.791 | 0.687 |
| 408 | 0.905 | 0.786 | 0.778 | 0.822 | 0.733 |
| 409 | 0.910 | 0.778 | 0.734 | 0.807 | 0.710 |
| 410 | 0.905 | 0.817 | 0.754 | 0.826 | 0.738 |
| 411 | 0.916 | 0.819 | 0.766 | 0.834 | 0.751 |
| 412 | 0.922 | 0.778 | 0.751 | 0.816 | 0.724 |
| 413 | 0.922 | 0.775 | 0.743 | 0.813 | 0.719 |
| 414 | 0.913 | 0.806 | 0.757 | 0.826 | 0.738 |
| 415 | 0.913 | 0.832 | 0.743 | 0.830 | 0.745 |
| 416 | 0.910 | 0.809 | 0.766 | 0.828 | 0.743 |
| 417 | 0.908 | 0.804 | 0.751 | 0.821 | 0.731 |
| 418 | 0.919 | 0.793 | 0.734 | 0.815 | 0.723 |
| 419 | 0.893 | 0.778 | 0.731 | 0.800 | 0.701 |
| 420 | 0.916 | 0.809 | 0.757 | 0.828 | 0.741 |
| 421 | 0.913 | 0.793 | 0.725 | 0.811 | 0.716 |
| 422 | 0.896 | 0.801 | 0.710 | 0.803 | 0.704 |
| 423 | 0.910 | 0.806 | 0.737 | 0.818 | 0.727 |
| 424 | 0.934 | 0.806 | 0.763 | 0.834 | 0.751 |
| 425 | 0.899 | 0.827 | 0.743 | 0.824 | 0.735 |
| 426 | 0.922 | 0.804 | 0.731 | 0.819 | 0.728 |
| 427 | 0.902 | 0.804 | 0.766 | 0.824 | 0.736 |
| 428 | 0.908 | 0.757 | 0.772 | 0.811 | 0.717 |
| 429 | 0.919 | 0.791 | 0.749 | 0.819 | 0.729 |
| 430 | 0.925 | 0.804 | 0.734 | 0.821 | 0.731 |
| 431 | 0.899 | 0.775 | 0.740 | 0.804 | 0.706 |



|     |       |       |       |       |       |
|-----|-------|-------|-------|-------|-------|
| 432 | 0.902 | 0.811 | 0.728 | 0.814 | 0.721 |
| 433 | 0.908 | 0.817 | 0.731 | 0.819 | 0.728 |
| 434 | 0.899 | 0.783 | 0.749 | 0.810 | 0.715 |
| 435 | 0.899 | 0.786 | 0.757 | 0.813 | 0.720 |
| 436 | 0.902 | 0.804 | 0.743 | 0.816 | 0.724 |
| 437 | 0.916 | 0.765 | 0.746 | 0.808 | 0.712 |
| 438 | 0.913 | 0.773 | 0.740 | 0.808 | 0.712 |
| 439 | 0.922 | 0.819 | 0.737 | 0.827 | 0.739 |
| 440 | 0.905 | 0.804 | 0.769 | 0.826 | 0.739 |
| 441 | 0.910 | 0.798 | 0.737 | 0.815 | 0.723 |
| 442 | 0.928 | 0.801 | 0.760 | 0.829 | 0.744 |
| 443 | 0.931 | 0.798 | 0.749 | 0.826 | 0.738 |
| 444 | 0.887 | 0.767 | 0.760 | 0.804 | 0.706 |
| 445 | 0.910 | 0.757 | 0.737 | 0.800 | 0.701 |
| 446 | 0.916 | 0.778 | 0.749 | 0.813 | 0.720 |
| 447 | 0.913 | 0.806 | 0.734 | 0.818 | 0.727 |
| 448 | 0.916 | 0.804 | 0.722 | 0.814 | 0.721 |
| 449 | 0.916 | 0.801 | 0.751 | 0.823 | 0.734 |
| 450 | 0.893 | 0.796 | 0.751 | 0.813 | 0.720 |
| 451 | 0.913 | 0.801 | 0.719 | 0.812 | 0.717 |
| 452 | 0.913 | 0.788 | 0.769 | 0.823 | 0.735 |
| 453 | 0.896 | 0.767 | 0.740 | 0.800 | 0.701 |
| 454 | 0.913 | 0.811 | 0.751 | 0.826 | 0.738 |
| 455 | 0.919 | 0.809 | 0.766 | 0.831 | 0.747 |
| 456 | 0.934 | 0.788 | 0.757 | 0.826 | 0.738 |
| 457 | 0.916 | 0.814 | 0.763 | 0.831 | 0.747 |
| 458 | 0.919 | 0.788 | 0.763 | 0.823 | 0.734 |
| 459 | 0.908 | 0.780 | 0.722 | 0.803 | 0.704 |
| 460 | 0.913 | 0.809 | 0.749 | 0.824 | 0.735 |
| 461 | 0.919 | 0.786 | 0.766 | 0.823 | 0.735 |
| 462 | 0.916 | 0.801 | 0.737 | 0.818 | 0.727 |
| 463 | 0.899 | 0.775 | 0.763 | 0.812 | 0.718 |
| 464 | 0.905 | 0.773 | 0.757 | 0.811 | 0.716 |
| 465 | 0.925 | 0.770 | 0.749 | 0.813 | 0.720 |
| 466 | 0.936 | 0.786 | 0.719 | 0.813 | 0.720 |
| 467 | 0.919 | 0.775 | 0.757 | 0.816 | 0.724 |
| 468 | 0.916 | 0.788 | 0.734 | 0.813 | 0.718 |
| 469 | 0.913 | 0.780 | 0.746 | 0.813 | 0.719 |
| 470 | 0.913 | 0.765 | 0.754 | 0.810 | 0.715 |
| 471 | 0.908 | 0.809 | 0.737 | 0.818 | 0.727 |
| 472 | 0.902 | 0.783 | 0.754 | 0.813 | 0.719 |
| 473 | 0.928 | 0.780 | 0.740 | 0.815 | 0.723 |

|     |       |       |       |       |       |
|-----|-------|-------|-------|-------|-------|
| 474 | 0.905 | 0.793 | 0.778 | 0.825 | 0.737 |
| 475 | 0.916 | 0.780 | 0.775 | 0.823 | 0.735 |
| 476 | 0.925 | 0.801 | 0.751 | 0.826 | 0.738 |
| 477 | 0.905 | 0.793 | 0.766 | 0.821 | 0.732 |
| 478 | 0.910 | 0.773 | 0.746 | 0.809 | 0.713 |
| 479 | 0.902 | 0.786 | 0.769 | 0.818 | 0.728 |
| 480 | 0.922 | 0.804 | 0.749 | 0.825 | 0.737 |
| 481 | 0.913 | 0.778 | 0.772 | 0.820 | 0.731 |
| 482 | 0.896 | 0.819 | 0.757 | 0.825 | 0.737 |
| 483 | 0.908 | 0.806 | 0.772 | 0.828 | 0.743 |
| 484 | 0.905 | 0.801 | 0.743 | 0.816 | 0.724 |
| 485 | 0.916 | 0.760 | 0.772 | 0.814 | 0.723 |
| 486 | 0.908 | 0.778 | 0.743 | 0.809 | 0.713 |
| 487 | 0.916 | 0.793 | 0.746 | 0.818 | 0.727 |
| 488 | 0.922 | 0.819 | 0.772 | 0.838 | 0.757 |
| 489 | 0.925 | 0.832 | 0.725 | 0.828 | 0.742 |
| 490 | 0.913 | 0.767 | 0.725 | 0.801 | 0.702 |
| 491 | 0.910 | 0.801 | 0.760 | 0.824 | 0.735 |
| 492 | 0.910 | 0.809 | 0.743 | 0.821 | 0.731 |
| 493 | 0.925 | 0.783 | 0.760 | 0.822 | 0.733 |
| 494 | 0.905 | 0.765 | 0.766 | 0.811 | 0.717 |
| 495 | 0.913 | 0.788 | 0.740 | 0.813 | 0.720 |
| 496 | 0.905 | 0.780 | 0.778 | 0.820 | 0.731 |
| 497 | 0.896 | 0.801 | 0.775 | 0.824 | 0.736 |
| 498 | 0.916 | 0.796 | 0.749 | 0.820 | 0.730 |
| 499 | 0.916 | 0.796 | 0.740 | 0.817 | 0.725 |
| 500 | 0.919 | 0.801 | 0.766 | 0.828 | 0.743 |
| 501 | 0.922 | 0.788 | 0.760 | 0.823 | 0.734 |
| 502 | 0.925 | 0.804 | 0.746 | 0.825 | 0.737 |
| 503 | 0.922 | 0.798 | 0.680 | 0.801 | 0.701 |
| 504 | 0.916 | 0.791 | 0.772 | 0.826 | 0.739 |
| 505 | 0.910 | 0.778 | 0.763 | 0.816 | 0.725 |
| 506 | 0.905 | 0.832 | 0.751 | 0.830 | 0.745 |
| 507 | 0.910 | 0.798 | 0.746 | 0.818 | 0.727 |
| 508 | 0.899 | 0.804 | 0.760 | 0.821 | 0.731 |
| 509 | 0.928 | 0.804 | 0.775 | 0.835 | 0.753 |
| 510 | 0.919 | 0.752 | 0.722 | 0.797 | 0.695 |
| 511 | 0.916 | 0.806 | 0.751 | 0.825 | 0.737 |
| 512 | 0.899 | 0.791 | 0.757 | 0.815 | 0.723 |
| 513 | 0.913 | 0.801 | 0.763 | 0.826 | 0.738 |
| 514 | 0.902 | 0.809 | 0.743 | 0.818 | 0.727 |
| 515 | 0.908 | 0.832 | 0.751 | 0.831 | 0.747 |

|     |       |       |       |       |       |
|-----|-------|-------|-------|-------|-------|
| 516 | 0.913 | 0.827 | 0.725 | 0.823 | 0.734 |
| 517 | 0.902 | 0.793 | 0.778 | 0.824 | 0.736 |
| 518 | 0.908 | 0.762 | 0.763 | 0.810 | 0.715 |
| 519 | 0.899 | 0.832 | 0.746 | 0.827 | 0.739 |
| 520 | 0.913 | 0.822 | 0.757 | 0.831 | 0.747 |
| 521 | 0.916 | 0.770 | 0.766 | 0.816 | 0.725 |
| 522 | 0.910 | 0.778 | 0.743 | 0.810 | 0.714 |
| 523 | 0.902 | 0.835 | 0.749 | 0.829 | 0.744 |
| 524 | 0.919 | 0.801 | 0.749 | 0.823 | 0.734 |
| 525 | 0.925 | 0.806 | 0.728 | 0.820 | 0.730 |
| 526 | 0.925 | 0.786 | 0.760 | 0.823 | 0.734 |
| 527 | 0.916 | 0.786 | 0.757 | 0.819 | 0.729 |
| 528 | 0.908 | 0.773 | 0.746 | 0.808 | 0.712 |
| 529 | 0.902 | 0.765 | 0.769 | 0.811 | 0.716 |
| 530 | 0.919 | 0.801 | 0.766 | 0.828 | 0.743 |
| 531 | 0.919 | 0.762 | 0.746 | 0.808 | 0.712 |
| 532 | 0.896 | 0.801 | 0.743 | 0.813 | 0.720 |
| 533 | 0.919 | 0.806 | 0.728 | 0.818 | 0.727 |
| 534 | 0.910 | 0.801 | 0.754 | 0.822 | 0.733 |
| 535 | 0.908 | 0.765 | 0.725 | 0.799 | 0.697 |
| 536 | 0.896 | 0.765 | 0.722 | 0.794 | 0.691 |
| 537 | 0.902 | 0.780 | 0.772 | 0.817 | 0.726 |
| 538 | 0.916 | 0.796 | 0.737 | 0.816 | 0.724 |
| 539 | 0.919 | 0.765 | 0.763 | 0.814 | 0.722 |
| 540 | 0.916 | 0.752 | 0.740 | 0.801 | 0.702 |
| 541 | 0.925 | 0.798 | 0.743 | 0.822 | 0.733 |
| 542 | 0.931 | 0.793 | 0.763 | 0.828 | 0.743 |
| 543 | 0.910 | 0.767 | 0.766 | 0.813 | 0.721 |
| 544 | 0.908 | 0.793 | 0.751 | 0.817 | 0.726 |
| 545 | 0.896 | 0.801 | 0.749 | 0.815 | 0.723 |
| 546 | 0.934 | 0.804 | 0.757 | 0.831 | 0.747 |
| 547 | 0.910 | 0.780 | 0.737 | 0.809 | 0.713 |
| 548 | 0.893 | 0.783 | 0.760 | 0.812 | 0.718 |
| 549 | 0.913 | 0.793 | 0.754 | 0.820 | 0.730 |
| 550 | 0.916 | 0.778 | 0.731 | 0.808 | 0.711 |
| 551 | 0.919 | 0.775 | 0.743 | 0.812 | 0.717 |
| 552 | 0.939 | 0.742 | 0.716 | 0.798 | 0.697 |
| 553 | 0.913 | 0.778 | 0.746 | 0.812 | 0.717 |
| 554 | 0.922 | 0.806 | 0.680 | 0.804 | 0.706 |
| 555 | 0.902 | 0.811 | 0.713 | 0.810 | 0.714 |
| 556 | 0.908 | 0.718 | 0.710 | 0.777 | 0.666 |
| 557 | 0.905 | 0.788 | 0.710 | 0.801 | 0.701 |

|     |       |       |       |       |       |
|-----|-------|-------|-------|-------|-------|
| 558 | 0.905 | 0.791 | 0.757 | 0.817 | 0.726 |
| 559 | 0.919 | 0.765 | 0.725 | 0.802 | 0.704 |
| 560 | 0.928 | 0.780 | 0.719 | 0.809 | 0.713 |
| 561 | 0.890 | 0.801 | 0.707 | 0.800 | 0.700 |
| 562 | 0.908 | 0.762 | 0.763 | 0.810 | 0.715 |
| 563 | 0.925 | 0.783 | 0.749 | 0.818 | 0.727 |
| 564 | 0.905 | 0.798 | 0.751 | 0.818 | 0.727 |
| 565 | 0.908 | 0.806 | 0.737 | 0.817 | 0.725 |
| 566 | 0.922 | 0.796 | 0.746 | 0.821 | 0.731 |
| 567 | 0.902 | 0.783 | 0.737 | 0.807 | 0.710 |
| 568 | 0.922 | 0.778 | 0.737 | 0.812 | 0.717 |
| 569 | 0.925 | 0.796 | 0.778 | 0.832 | 0.749 |
| 570 | 0.908 | 0.783 | 0.719 | 0.803 | 0.704 |
| 571 | 0.913 | 0.773 | 0.754 | 0.813 | 0.719 |
| 572 | 0.919 | 0.801 | 0.740 | 0.820 | 0.730 |
| 573 | 0.910 | 0.817 | 0.763 | 0.830 | 0.745 |
| 574 | 0.957 | 0.783 | 0.737 | 0.825 | 0.737 |
| 575 | 0.922 | 0.806 | 0.763 | 0.830 | 0.745 |
| 576 | 0.919 | 0.796 | 0.725 | 0.813 | 0.720 |
| 577 | 0.908 | 0.752 | 0.749 | 0.801 | 0.703 |
| 578 | 0.908 | 0.798 | 0.731 | 0.813 | 0.718 |
| 579 | 0.910 | 0.783 | 0.749 | 0.813 | 0.720 |
| 580 | 0.910 | 0.801 | 0.760 | 0.824 | 0.736 |
| 581 | 0.916 | 0.788 | 0.731 | 0.812 | 0.717 |
| 582 | 0.902 | 0.788 | 0.763 | 0.817 | 0.726 |
| 583 | 0.896 | 0.809 | 0.746 | 0.817 | 0.726 |
| 584 | 0.916 | 0.819 | 0.743 | 0.827 | 0.739 |
| 585 | 0.919 | 0.811 | 0.751 | 0.828 | 0.741 |
| 586 | 0.919 | 0.773 | 0.743 | 0.811 | 0.716 |
| 587 | 0.922 | 0.822 | 0.790 | 0.844 | 0.766 |
| 588 | 0.919 | 0.796 | 0.740 | 0.818 | 0.727 |
| 589 | 0.928 | 0.817 | 0.749 | 0.831 | 0.747 |
| 590 | 0.916 | 0.804 | 0.728 | 0.816 | 0.724 |
| 591 | 0.905 | 0.806 | 0.754 | 0.822 | 0.733 |
| 592 | 0.910 | 0.817 | 0.775 | 0.834 | 0.751 |
| 593 | 0.913 | 0.767 | 0.778 | 0.818 | 0.728 |
| 594 | 0.908 | 0.780 | 0.772 | 0.819 | 0.729 |
| 595 | 0.925 | 0.801 | 0.728 | 0.818 | 0.727 |
| 596 | 0.919 | 0.775 | 0.737 | 0.810 | 0.715 |
| 597 | 0.899 | 0.786 | 0.734 | 0.806 | 0.709 |
| 598 | 0.910 | 0.775 | 0.713 | 0.799 | 0.699 |
| 599 | 0.908 | 0.801 | 0.740 | 0.816 | 0.724 |

|     |       |       |       |       |       |
|-----|-------|-------|-------|-------|-------|
| 600 | 0.919 | 0.773 | 0.760 | 0.816 | 0.725 |
| 601 | 0.916 | 0.786 | 0.728 | 0.810 | 0.714 |
| 602 | 0.922 | 0.791 | 0.769 | 0.827 | 0.740 |
| 603 | 0.902 | 0.796 | 0.757 | 0.818 | 0.727 |
| 604 | 0.919 | 0.780 | 0.728 | 0.809 | 0.713 |
| 605 | 0.905 | 0.783 | 0.719 | 0.802 | 0.703 |
| 606 | 0.922 | 0.811 | 0.737 | 0.824 | 0.735 |
| 607 | 0.905 | 0.796 | 0.740 | 0.813 | 0.720 |
| 608 | 0.916 | 0.791 | 0.734 | 0.813 | 0.720 |
| 609 | 0.925 | 0.765 | 0.737 | 0.808 | 0.712 |
| 610 | 0.922 | 0.786 | 0.769 | 0.825 | 0.737 |
| 611 | 0.931 | 0.809 | 0.796 | 0.844 | 0.767 |
| 612 | 0.893 | 0.780 | 0.731 | 0.801 | 0.702 |
| 613 | 0.893 | 0.798 | 0.760 | 0.817 | 0.726 |
| 614 | 0.913 | 0.762 | 0.749 | 0.807 | 0.711 |
| 615 | 0.913 | 0.744 | 0.743 | 0.799 | 0.698 |
| 616 | 0.910 | 0.775 | 0.713 | 0.799 | 0.699 |
| 617 | 0.908 | 0.765 | 0.769 | 0.813 | 0.719 |
| 618 | 0.905 | 0.791 | 0.722 | 0.806 | 0.708 |
| 619 | 0.919 | 0.783 | 0.707 | 0.803 | 0.704 |
| 620 | 0.916 | 0.806 | 0.757 | 0.827 | 0.740 |
| 621 | 0.919 | 0.783 | 0.757 | 0.819 | 0.729 |
| 622 | 0.913 | 0.809 | 0.719 | 0.814 | 0.721 |
| 623 | 0.922 | 0.811 | 0.731 | 0.822 | 0.732 |
| 624 | 0.919 | 0.819 | 0.737 | 0.826 | 0.738 |
| 625 | 0.928 | 0.765 | 0.746 | 0.812 | 0.718 |
| 626 | 0.910 | 0.775 | 0.781 | 0.821 | 0.732 |
| 627 | 0.913 | 0.752 | 0.743 | 0.801 | 0.702 |
| 628 | 0.928 | 0.791 | 0.766 | 0.828 | 0.741 |
| 629 | 0.916 | 0.780 | 0.757 | 0.817 | 0.726 |
| 630 | 0.916 | 0.801 | 0.754 | 0.824 | 0.735 |
| 631 | 0.916 | 0.767 | 0.722 | 0.801 | 0.702 |
| 632 | 0.925 | 0.783 | 0.734 | 0.813 | 0.720 |
| 633 | 0.910 | 0.775 | 0.760 | 0.814 | 0.722 |
| 634 | 0.910 | 0.757 | 0.743 | 0.802 | 0.703 |
| 635 | 0.905 | 0.798 | 0.725 | 0.810 | 0.714 |
| 636 | 0.925 | 0.801 | 0.751 | 0.826 | 0.738 |
| 637 | 0.922 | 0.793 | 0.740 | 0.818 | 0.727 |
| 638 | 0.908 | 0.770 | 0.725 | 0.800 | 0.700 |
| 639 | 0.916 | 0.762 | 0.725 | 0.800 | 0.701 |
| 640 | 0.910 | 0.811 | 0.734 | 0.819 | 0.728 |
| 641 | 0.925 | 0.804 | 0.722 | 0.817 | 0.725 |

|     |       |       |       |       |       |
|-----|-------|-------|-------|-------|-------|
| 642 | 0.919 | 0.801 | 0.731 | 0.817 | 0.725 |
| 643 | 0.934 | 0.793 | 0.754 | 0.827 | 0.740 |
| 644 | 0.931 | 0.811 | 0.731 | 0.825 | 0.737 |
| 645 | 0.919 | 0.757 | 0.701 | 0.792 | 0.687 |
| 646 | 0.916 | 0.809 | 0.728 | 0.818 | 0.727 |
| 647 | 0.908 | 0.760 | 0.719 | 0.795 | 0.692 |
| 648 | 0.922 | 0.809 | 0.737 | 0.823 | 0.734 |
| 649 | 0.893 | 0.786 | 0.769 | 0.815 | 0.723 |
| 650 | 0.896 | 0.804 | 0.719 | 0.807 | 0.710 |
| 651 | 0.908 | 0.786 | 0.731 | 0.808 | 0.711 |
| 652 | 0.916 | 0.814 | 0.716 | 0.816 | 0.724 |
| 653 | 0.922 | 0.788 | 0.737 | 0.815 | 0.723 |
| 654 | 0.925 | 0.773 | 0.713 | 0.803 | 0.704 |
| 655 | 0.922 | 0.806 | 0.760 | 0.829 | 0.744 |
| 656 | 0.913 | 0.817 | 0.722 | 0.818 | 0.727 |
| 657 | 0.934 | 0.780 | 0.746 | 0.819 | 0.729 |
| 658 | 0.922 | 0.757 | 0.719 | 0.799 | 0.698 |
| 659 | 0.910 | 0.767 | 0.731 | 0.802 | 0.703 |
| 660 | 0.908 | 0.760 | 0.725 | 0.797 | 0.695 |
| 661 | 0.899 | 0.798 | 0.754 | 0.817 | 0.726 |
| 662 | 0.890 | 0.806 | 0.716 | 0.805 | 0.707 |
| 663 | 0.896 | 0.780 | 0.743 | 0.806 | 0.709 |
| 664 | 0.934 | 0.796 | 0.754 | 0.828 | 0.741 |
| 665 | 0.899 | 0.788 | 0.775 | 0.820 | 0.730 |
| 666 | 0.922 | 0.778 | 0.719 | 0.806 | 0.709 |
| 667 | 0.931 | 0.788 | 0.754 | 0.824 | 0.736 |
| 668 | 0.902 | 0.767 | 0.731 | 0.799 | 0.699 |
| 669 | 0.916 | 0.773 | 0.728 | 0.805 | 0.707 |
| 670 | 0.919 | 0.791 | 0.743 | 0.817 | 0.725 |
| 671 | 0.910 | 0.783 | 0.751 | 0.814 | 0.721 |
| 672 | 0.910 | 0.780 | 0.743 | 0.811 | 0.716 |
| 673 | 0.916 | 0.773 | 0.757 | 0.814 | 0.722 |
| 674 | 0.908 | 0.796 | 0.707 | 0.804 | 0.706 |
| 675 | 0.893 | 0.762 | 0.716 | 0.790 | 0.685 |
| 676 | 0.913 | 0.788 | 0.769 | 0.823 | 0.735 |
| 677 | 0.931 | 0.793 | 0.719 | 0.814 | 0.721 |
| 678 | 0.908 | 0.804 | 0.728 | 0.813 | 0.720 |
| 679 | 0.922 | 0.801 | 0.737 | 0.820 | 0.730 |
| 680 | 0.910 | 0.801 | 0.766 | 0.826 | 0.738 |
| 681 | 0.922 | 0.778 | 0.740 | 0.813 | 0.719 |
| 682 | 0.928 | 0.765 | 0.740 | 0.810 | 0.715 |
| 683 | 0.905 | 0.804 | 0.757 | 0.822 | 0.733 |

|     |       |       |       |       |       |
|-----|-------|-------|-------|-------|-------|
| 684 | 0.913 | 0.811 | 0.749 | 0.825 | 0.737 |
| 685 | 0.905 | 0.770 | 0.728 | 0.800 | 0.701 |
| 686 | 0.919 | 0.770 | 0.751 | 0.813 | 0.719 |
| 687 | 0.910 | 0.791 | 0.766 | 0.822 | 0.733 |
| 688 | 0.905 | 0.798 | 0.743 | 0.815 | 0.723 |
| 689 | 0.913 | 0.791 | 0.704 | 0.803 | 0.704 |
| 690 | 0.925 | 0.801 | 0.749 | 0.825 | 0.737 |
| 691 | 0.928 | 0.767 | 0.713 | 0.802 | 0.703 |
| 692 | 0.902 | 0.801 | 0.749 | 0.817 | 0.726 |
| 693 | 0.916 | 0.786 | 0.740 | 0.813 | 0.720 |
| 694 | 0.913 | 0.804 | 0.737 | 0.818 | 0.727 |
| 695 | 0.919 | 0.786 | 0.692 | 0.799 | 0.698 |
| 696 | 0.913 | 0.780 | 0.722 | 0.805 | 0.707 |
| 697 | 0.905 | 0.788 | 0.710 | 0.801 | 0.701 |
| 698 | 0.910 | 0.791 | 0.751 | 0.817 | 0.726 |
| 699 | 0.916 | 0.796 | 0.749 | 0.820 | 0.730 |
| 700 | 0.902 | 0.760 | 0.743 | 0.800 | 0.701 |
| 701 | 0.910 | 0.736 | 0.731 | 0.791 | 0.687 |
| 702 | 0.913 | 0.775 | 0.754 | 0.813 | 0.721 |
| 703 | 0.922 | 0.786 | 0.734 | 0.813 | 0.720 |
| 704 | 0.922 | 0.783 | 0.737 | 0.813 | 0.720 |
| 705 | 0.916 | 0.755 | 0.740 | 0.802 | 0.704 |
| 706 | 0.913 | 0.749 | 0.763 | 0.807 | 0.711 |
| 707 | 0.913 | 0.770 | 0.749 | 0.810 | 0.715 |
| 708 | 0.893 | 0.765 | 0.710 | 0.789 | 0.683 |
| 709 | 0.922 | 0.765 | 0.731 | 0.805 | 0.708 |
| 710 | 0.910 | 0.817 | 0.719 | 0.816 | 0.724 |
| 711 | 0.913 | 0.770 | 0.746 | 0.809 | 0.713 |
| 712 | 0.916 | 0.749 | 0.763 | 0.808 | 0.713 |
| 713 | 0.910 | 0.755 | 0.766 | 0.809 | 0.714 |
| 714 | 0.908 | 0.809 | 0.763 | 0.827 | 0.740 |
| 715 | 0.910 | 0.835 | 0.769 | 0.839 | 0.758 |
| 716 | 0.910 | 0.775 | 0.737 | 0.807 | 0.710 |
| 717 | 0.916 | 0.780 | 0.763 | 0.819 | 0.729 |
| 718 | 0.931 | 0.801 | 0.740 | 0.824 | 0.735 |
| 719 | 0.934 | 0.793 | 0.746 | 0.824 | 0.735 |
| 720 | 0.908 | 0.806 | 0.737 | 0.817 | 0.725 |
| 721 | 0.922 | 0.778 | 0.734 | 0.811 | 0.716 |
| 722 | 0.939 | 0.793 | 0.749 | 0.827 | 0.740 |
| 723 | 0.910 | 0.734 | 0.754 | 0.798 | 0.697 |
| 724 | 0.913 | 0.809 | 0.719 | 0.814 | 0.721 |
| 725 | 0.916 | 0.791 | 0.722 | 0.810 | 0.714 |

|     |       |       |       |       |       |
|-----|-------|-------|-------|-------|-------|
| 726 | 0.913 | 0.786 | 0.731 | 0.810 | 0.714 |
| 727 | 0.899 | 0.811 | 0.737 | 0.816 | 0.724 |
| 728 | 0.913 | 0.770 | 0.731 | 0.804 | 0.706 |
| 729 | 0.913 | 0.791 | 0.766 | 0.823 | 0.734 |
| 730 | 0.928 | 0.796 | 0.754 | 0.826 | 0.738 |
| 731 | 0.910 | 0.775 | 0.760 | 0.814 | 0.722 |
| 732 | 0.913 | 0.801 | 0.766 | 0.827 | 0.740 |
| 733 | 0.913 | 0.814 | 0.749 | 0.826 | 0.738 |
| 734 | 0.925 | 0.775 | 0.731 | 0.810 | 0.714 |
| 735 | 0.919 | 0.786 | 0.707 | 0.804 | 0.706 |
| 736 | 0.925 | 0.791 | 0.743 | 0.819 | 0.728 |
| 737 | 0.916 | 0.786 | 0.754 | 0.818 | 0.727 |
| 738 | 0.916 | 0.780 | 0.760 | 0.818 | 0.727 |
| 739 | 0.890 | 0.780 | 0.763 | 0.811 | 0.716 |
| 740 | 0.922 | 0.793 | 0.769 | 0.828 | 0.741 |
| 741 | 0.905 | 0.793 | 0.707 | 0.802 | 0.703 |
| 742 | 0.916 | 0.801 | 0.734 | 0.817 | 0.725 |
| 743 | 0.919 | 0.801 | 0.728 | 0.816 | 0.724 |
| 744 | 0.925 | 0.762 | 0.749 | 0.811 | 0.716 |
| 745 | 0.905 | 0.760 | 0.743 | 0.801 | 0.702 |
| 746 | 0.916 | 0.780 | 0.743 | 0.813 | 0.719 |
| 747 | 0.925 | 0.788 | 0.716 | 0.810 | 0.714 |
| 748 | 0.928 | 0.767 | 0.754 | 0.815 | 0.723 |
| 749 | 0.896 | 0.744 | 0.751 | 0.796 | 0.694 |
| 750 | 0.919 | 0.809 | 0.722 | 0.817 | 0.725 |
| 751 | 0.910 | 0.721 | 0.760 | 0.795 | 0.694 |
| 752 | 0.922 | 0.775 | 0.763 | 0.819 | 0.729 |
| 753 | 0.902 | 0.809 | 0.754 | 0.822 | 0.733 |
| 754 | 0.910 | 0.788 | 0.731 | 0.810 | 0.714 |
| 755 | 0.908 | 0.788 | 0.763 | 0.819 | 0.729 |
| 756 | 0.913 | 0.786 | 0.713 | 0.804 | 0.706 |
| 757 | 0.919 | 0.773 | 0.716 | 0.802 | 0.703 |
| 758 | 0.913 | 0.788 | 0.775 | 0.825 | 0.738 |
| 759 | 0.910 | 0.786 | 0.728 | 0.808 | 0.711 |
| 760 | 0.902 | 0.793 | 0.743 | 0.813 | 0.719 |
| 761 | 0.910 | 0.788 | 0.719 | 0.806 | 0.709 |
| 762 | 0.922 | 0.796 | 0.763 | 0.827 | 0.740 |
| 763 | 0.896 | 0.775 | 0.722 | 0.798 | 0.696 |
| 764 | 0.908 | 0.767 | 0.722 | 0.799 | 0.698 |
| 765 | 0.913 | 0.775 | 0.713 | 0.800 | 0.700 |
| 766 | 0.916 | 0.811 | 0.719 | 0.816 | 0.724 |
| 767 | 0.919 | 0.806 | 0.716 | 0.814 | 0.721 |



|     |       |       |       |       |       |
|-----|-------|-------|-------|-------|-------|
| 768 | 0.916 | 0.775 | 0.746 | 0.812 | 0.717 |
| 769 | 0.919 | 0.788 | 0.728 | 0.812 | 0.717 |
| 770 | 0.916 | 0.786 | 0.746 | 0.815 | 0.723 |
| 771 | 0.910 | 0.786 | 0.746 | 0.813 | 0.720 |
| 772 | 0.922 | 0.793 | 0.707 | 0.808 | 0.711 |
| 773 | 0.916 | 0.798 | 0.740 | 0.818 | 0.727 |
| 774 | 0.925 | 0.809 | 0.731 | 0.822 | 0.732 |
| 775 | 0.928 | 0.798 | 0.746 | 0.824 | 0.735 |
| 776 | 0.905 | 0.788 | 0.740 | 0.811 | 0.716 |
| 777 | 0.913 | 0.791 | 0.766 | 0.823 | 0.735 |
| 778 | 0.910 | 0.783 | 0.754 | 0.815 | 0.723 |
| 779 | 0.916 | 0.786 | 0.713 | 0.805 | 0.707 |
| 780 | 0.899 | 0.778 | 0.737 | 0.804 | 0.706 |
| 781 | 0.928 | 0.804 | 0.751 | 0.828 | 0.741 |
| 782 | 0.922 | 0.796 | 0.740 | 0.819 | 0.728 |
| 783 | 0.934 | 0.775 | 0.725 | 0.811 | 0.716 |
| 784 | 0.910 | 0.786 | 0.737 | 0.811 | 0.716 |
| 785 | 0.913 | 0.757 | 0.766 | 0.811 | 0.717 |
| 786 | 0.908 | 0.793 | 0.746 | 0.815 | 0.723 |
| 787 | 0.916 | 0.770 | 0.751 | 0.812 | 0.718 |
| 788 | 0.936 | 0.773 | 0.701 | 0.803 | 0.704 |

(2) Performance of KNN on top features yielded by three feature selection methods

| <b>mRMR</b>                |           |             |          |            |            |
|----------------------------|-----------|-------------|----------|------------|------------|
| <b>Numbers of features</b> | <b>G1</b> | <b>G2/M</b> | <b>S</b> | <b>ACC</b> | <b>MCC</b> |
| 1                          | 0.902     | 0.643       | 0.554    | 0.699      | 0.549      |
| 2                          | 0.916     | 0.755       | 0.674    | 0.782      | 0.672      |
| 3                          | 0.870     | 0.752       | 0.716    | 0.779      | 0.669      |
| 4                          | 0.899     | 0.767       | 0.749    | 0.804      | 0.707      |
| 5                          | 0.925     | 0.798       | 0.731    | 0.818      | 0.727      |
| 6                          | 0.936     | 0.765       | 0.692    | 0.798      | 0.696      |
| 7                          | 0.925     | 0.757       | 0.722    | 0.800      | 0.701      |
| 8                          | 0.939     | 0.757       | 0.674    | 0.790      | 0.685      |
| 9                          | 0.948     | 0.778       | 0.686    | 0.804      | 0.706      |
| 10                         | 0.939     | 0.747       | 0.692    | 0.792      | 0.688      |
| 11                         | 0.945     | 0.749       | 0.677    | 0.790      | 0.685      |
| 12                         | 0.957     | 0.778       | 0.707    | 0.813      | 0.720      |
| 13                         | 0.957     | 0.770       | 0.710    | 0.812      | 0.717      |
| 14                         | 0.960     | 0.755       | 0.737    | 0.815      | 0.723      |
| 15                         | 0.954     | 0.780       | 0.728    | 0.820      | 0.730      |
| 16                         | 0.957     | 0.773       | 0.751    | 0.826      | 0.738      |
| 17                         | 0.945     | 0.770       | 0.746    | 0.819      | 0.729      |
| 18                         | 0.951     | 0.778       | 0.734    | 0.820      | 0.730      |

|    |       |       |       |       |       |
|----|-------|-------|-------|-------|-------|
| 19 | 0.957 | 0.770 | 0.751 | 0.825 | 0.737 |
| 20 | 0.945 | 0.744 | 0.751 | 0.812 | 0.718 |
| 21 | 0.939 | 0.752 | 0.743 | 0.810 | 0.715 |
| 22 | 0.951 | 0.757 | 0.749 | 0.817 | 0.726 |
| 23 | 0.962 | 0.780 | 0.737 | 0.826 | 0.738 |
| 24 | 0.960 | 0.791 | 0.754 | 0.834 | 0.751 |
| 25 | 0.962 | 0.786 | 0.734 | 0.827 | 0.739 |
| 26 | 0.960 | 0.783 | 0.757 | 0.832 | 0.748 |
| 27 | 0.957 | 0.793 | 0.754 | 0.834 | 0.751 |
| 28 | 0.954 | 0.804 | 0.737 | 0.831 | 0.746 |
| 29 | 0.954 | 0.814 | 0.719 | 0.829 | 0.744 |
| 30 | 0.954 | 0.819 | 0.746 | 0.840 | 0.759 |
| 31 | 0.954 | 0.819 | 0.757 | 0.843 | 0.765 |
| 32 | 0.948 | 0.829 | 0.749 | 0.843 | 0.763 |
| 33 | 0.962 | 0.827 | 0.731 | 0.841 | 0.761 |
| 34 | 0.957 | 0.827 | 0.754 | 0.846 | 0.769 |
| 35 | 0.954 | 0.840 | 0.781 | 0.858 | 0.787 |
| 36 | 0.971 | 0.832 | 0.784 | 0.862 | 0.793 |
| 37 | 0.971 | 0.840 | 0.796 | 0.869 | 0.803 |
| 38 | 0.974 | 0.827 | 0.769 | 0.857 | 0.784 |
| 39 | 0.962 | 0.842 | 0.790 | 0.865 | 0.797 |
| 40 | 0.960 | 0.840 | 0.784 | 0.861 | 0.792 |
| 41 | 0.960 | 0.837 | 0.784 | 0.860 | 0.790 |
| 42 | 0.968 | 0.848 | 0.790 | 0.869 | 0.803 |
| 43 | 0.957 | 0.832 | 0.772 | 0.854 | 0.780 |
| 44 | 0.951 | 0.835 | 0.772 | 0.853 | 0.779 |
| 45 | 0.957 | 0.829 | 0.784 | 0.857 | 0.785 |
| 46 | 0.951 | 0.853 | 0.787 | 0.864 | 0.796 |
| 47 | 0.962 | 0.835 | 0.784 | 0.860 | 0.790 |
| 48 | 0.962 | 0.829 | 0.778 | 0.857 | 0.784 |
| 49 | 0.962 | 0.835 | 0.760 | 0.853 | 0.779 |
| 50 | 0.960 | 0.832 | 0.763 | 0.852 | 0.777 |
| 51 | 0.957 | 0.832 | 0.793 | 0.860 | 0.790 |
| 52 | 0.957 | 0.835 | 0.784 | 0.858 | 0.787 |
| 53 | 0.962 | 0.804 | 0.796 | 0.853 | 0.779 |
| 54 | 0.957 | 0.793 | 0.802 | 0.849 | 0.774 |
| 55 | 0.954 | 0.788 | 0.826 | 0.854 | 0.782 |
| 56 | 0.954 | 0.798 | 0.805 | 0.851 | 0.777 |
| 57 | 0.960 | 0.801 | 0.811 | 0.856 | 0.784 |
| 58 | 0.962 | 0.791 | 0.799 | 0.849 | 0.774 |
| 59 | 0.962 | 0.791 | 0.817 | 0.855 | 0.783 |
| 60 | 0.962 | 0.798 | 0.796 | 0.851 | 0.777 |

|     |       |       |       |       |       |
|-----|-------|-------|-------|-------|-------|
| 61  | 0.960 | 0.798 | 0.790 | 0.848 | 0.772 |
| 62  | 0.957 | 0.788 | 0.811 | 0.850 | 0.776 |
| 63  | 0.951 | 0.783 | 0.778 | 0.836 | 0.754 |
| 64  | 0.948 | 0.778 | 0.802 | 0.841 | 0.762 |
| 65  | 0.948 | 0.775 | 0.793 | 0.837 | 0.756 |
| 66  | 0.968 | 0.791 | 0.796 | 0.850 | 0.775 |
| 67  | 0.965 | 0.811 | 0.781 | 0.852 | 0.778 |
| 68  | 0.965 | 0.811 | 0.805 | 0.859 | 0.789 |
| 69  | 0.971 | 0.765 | 0.778 | 0.836 | 0.755 |
| 70  | 0.974 | 0.767 | 0.763 | 0.833 | 0.750 |
| 71  | 0.968 | 0.757 | 0.778 | 0.832 | 0.749 |
| 72  | 0.977 | 0.757 | 0.760 | 0.829 | 0.745 |
| 73  | 0.974 | 0.744 | 0.763 | 0.825 | 0.738 |
| 74  | 0.974 | 0.749 | 0.781 | 0.832 | 0.750 |
| 75  | 0.974 | 0.757 | 0.778 | 0.834 | 0.752 |
| 76  | 0.971 | 0.762 | 0.751 | 0.827 | 0.740 |
| 77  | 0.977 | 0.767 | 0.772 | 0.837 | 0.756 |
| 78  | 0.971 | 0.760 | 0.793 | 0.839 | 0.759 |
| 79  | 0.977 | 0.762 | 0.769 | 0.834 | 0.752 |
| 80  | 0.977 | 0.752 | 0.769 | 0.830 | 0.746 |
| 81  | 0.974 | 0.762 | 0.784 | 0.838 | 0.758 |
| 82  | 0.974 | 0.757 | 0.766 | 0.830 | 0.746 |
| 83  | 0.965 | 0.757 | 0.754 | 0.824 | 0.736 |
| 84  | 0.983 | 0.749 | 0.772 | 0.832 | 0.749 |
| 85  | 0.980 | 0.752 | 0.757 | 0.828 | 0.742 |
| 86  | 0.977 | 0.749 | 0.760 | 0.827 | 0.740 |
| 87  | 0.983 | 0.755 | 0.766 | 0.832 | 0.749 |
| 88  | 0.971 | 0.757 | 0.775 | 0.832 | 0.749 |
| 89  | 0.977 | 0.752 | 0.784 | 0.835 | 0.754 |
| 90  | 0.980 | 0.749 | 0.775 | 0.832 | 0.749 |
| 91  | 0.977 | 0.765 | 0.757 | 0.831 | 0.747 |
| 92  | 0.977 | 0.739 | 0.781 | 0.829 | 0.746 |
| 93  | 0.974 | 0.742 | 0.766 | 0.825 | 0.738 |
| 94  | 0.977 | 0.752 | 0.760 | 0.828 | 0.742 |
| 95  | 0.974 | 0.752 | 0.790 | 0.836 | 0.755 |
| 96  | 0.980 | 0.749 | 0.784 | 0.835 | 0.754 |
| 97  | 0.983 | 0.734 | 0.749 | 0.819 | 0.730 |
| 98  | 0.974 | 0.752 | 0.754 | 0.825 | 0.737 |
| 99  | 0.971 | 0.747 | 0.763 | 0.825 | 0.738 |
| 100 | 0.977 | 0.752 | 0.757 | 0.827 | 0.740 |
| 101 | 0.980 | 0.744 | 0.772 | 0.829 | 0.745 |
| 102 | 0.968 | 0.752 | 0.754 | 0.823 | 0.735 |

|     |       |       |       |       |       |
|-----|-------|-------|-------|-------|-------|
| 103 | 0.980 | 0.752 | 0.793 | 0.839 | 0.759 |
| 104 | 0.968 | 0.755 | 0.775 | 0.830 | 0.746 |
| 105 | 0.977 | 0.755 | 0.778 | 0.834 | 0.752 |
| 106 | 0.977 | 0.744 | 0.766 | 0.827 | 0.741 |
| 107 | 0.977 | 0.760 | 0.743 | 0.825 | 0.737 |
| 108 | 0.983 | 0.760 | 0.766 | 0.834 | 0.752 |
| 109 | 0.977 | 0.762 | 0.772 | 0.835 | 0.753 |
| 110 | 0.968 | 0.757 | 0.763 | 0.828 | 0.742 |
| 111 | 0.974 | 0.749 | 0.757 | 0.825 | 0.738 |
| 112 | 0.977 | 0.762 | 0.769 | 0.834 | 0.752 |
| 113 | 0.986 | 0.752 | 0.787 | 0.839 | 0.759 |
| 114 | 0.974 | 0.744 | 0.772 | 0.828 | 0.742 |
| 115 | 0.965 | 0.747 | 0.784 | 0.829 | 0.745 |
| 116 | 0.974 | 0.762 | 0.802 | 0.843 | 0.767 |
| 117 | 0.971 | 0.760 | 0.784 | 0.836 | 0.755 |
| 118 | 0.977 | 0.762 | 0.775 | 0.836 | 0.754 |
| 119 | 0.971 | 0.765 | 0.775 | 0.835 | 0.753 |
| 120 | 0.971 | 0.757 | 0.769 | 0.830 | 0.746 |
| 121 | 0.965 | 0.757 | 0.757 | 0.825 | 0.738 |
| 122 | 0.974 | 0.744 | 0.760 | 0.824 | 0.737 |
| 123 | 0.980 | 0.752 | 0.754 | 0.827 | 0.740 |
| 124 | 0.977 | 0.739 | 0.760 | 0.823 | 0.735 |
| 125 | 0.986 | 0.739 | 0.799 | 0.838 | 0.759 |
| 126 | 0.977 | 0.752 | 0.781 | 0.834 | 0.752 |
| 127 | 0.971 | 0.752 | 0.790 | 0.835 | 0.754 |
| 128 | 0.962 | 0.718 | 0.787 | 0.819 | 0.731 |
| 129 | 0.960 | 0.716 | 0.763 | 0.810 | 0.716 |
| 130 | 0.965 | 0.718 | 0.787 | 0.820 | 0.732 |
| 131 | 0.960 | 0.718 | 0.751 | 0.807 | 0.712 |
| 132 | 0.951 | 0.718 | 0.781 | 0.813 | 0.723 |
| 133 | 0.965 | 0.721 | 0.766 | 0.814 | 0.723 |
| 134 | 0.957 | 0.724 | 0.757 | 0.810 | 0.716 |
| 135 | 0.957 | 0.724 | 0.766 | 0.813 | 0.720 |
| 136 | 0.965 | 0.744 | 0.763 | 0.822 | 0.734 |
| 137 | 0.960 | 0.747 | 0.778 | 0.826 | 0.740 |
| 138 | 0.960 | 0.734 | 0.802 | 0.828 | 0.745 |
| 139 | 0.960 | 0.742 | 0.799 | 0.830 | 0.747 |
| 140 | 0.960 | 0.749 | 0.778 | 0.827 | 0.741 |
| 141 | 0.965 | 0.744 | 0.775 | 0.826 | 0.740 |
| 142 | 0.968 | 0.742 | 0.787 | 0.829 | 0.746 |
| 143 | 0.962 | 0.742 | 0.781 | 0.826 | 0.740 |
| 144 | 0.962 | 0.739 | 0.772 | 0.822 | 0.734 |

|     |       |       |       |       |       |
|-----|-------|-------|-------|-------|-------|
| 145 | 0.960 | 0.749 | 0.802 | 0.834 | 0.753 |
| 146 | 0.962 | 0.747 | 0.802 | 0.834 | 0.753 |
| 147 | 0.957 | 0.749 | 0.784 | 0.828 | 0.743 |
| 148 | 0.960 | 0.760 | 0.766 | 0.827 | 0.740 |
| 149 | 0.968 | 0.749 | 0.775 | 0.828 | 0.744 |
| 150 | 0.960 | 0.749 | 0.790 | 0.830 | 0.747 |
| 151 | 0.960 | 0.749 | 0.793 | 0.831 | 0.748 |
| 152 | 0.965 | 0.742 | 0.787 | 0.828 | 0.744 |
| 153 | 0.968 | 0.744 | 0.781 | 0.828 | 0.744 |
| 154 | 0.960 | 0.742 | 0.796 | 0.829 | 0.746 |
| 155 | 0.957 | 0.739 | 0.781 | 0.823 | 0.736 |
| 156 | 0.962 | 0.734 | 0.784 | 0.824 | 0.737 |
| 157 | 0.968 | 0.744 | 0.760 | 0.822 | 0.734 |
| 158 | 0.960 | 0.729 | 0.793 | 0.824 | 0.738 |
| 159 | 0.957 | 0.734 | 0.772 | 0.818 | 0.729 |
| 160 | 0.965 | 0.742 | 0.760 | 0.820 | 0.731 |
| 161 | 0.951 | 0.744 | 0.790 | 0.826 | 0.740 |
| 162 | 0.948 | 0.736 | 0.790 | 0.822 | 0.735 |
| 163 | 0.945 | 0.726 | 0.793 | 0.818 | 0.730 |
| 164 | 0.954 | 0.744 | 0.784 | 0.825 | 0.738 |
| 165 | 0.960 | 0.739 | 0.781 | 0.824 | 0.737 |
| 166 | 0.962 | 0.747 | 0.775 | 0.826 | 0.739 |
| 167 | 0.962 | 0.760 | 0.760 | 0.826 | 0.739 |
| 168 | 0.960 | 0.734 | 0.799 | 0.828 | 0.743 |
| 169 | 0.951 | 0.755 | 0.784 | 0.828 | 0.742 |
| 170 | 0.957 | 0.760 | 0.778 | 0.829 | 0.745 |
| 171 | 0.954 | 0.744 | 0.763 | 0.818 | 0.728 |
| 172 | 0.960 | 0.749 | 0.793 | 0.831 | 0.748 |
| 173 | 0.971 | 0.765 | 0.772 | 0.834 | 0.752 |
| 174 | 0.948 | 0.739 | 0.775 | 0.818 | 0.729 |
| 175 | 0.954 | 0.742 | 0.769 | 0.819 | 0.730 |
| 176 | 0.948 | 0.752 | 0.781 | 0.825 | 0.738 |
| 177 | 0.957 | 0.739 | 0.793 | 0.827 | 0.742 |
| 178 | 0.957 | 0.752 | 0.775 | 0.826 | 0.739 |
| 179 | 0.960 | 0.757 | 0.757 | 0.823 | 0.735 |
| 180 | 0.945 | 0.744 | 0.778 | 0.820 | 0.731 |
| 181 | 0.951 | 0.744 | 0.793 | 0.827 | 0.742 |
| 182 | 0.957 | 0.757 | 0.793 | 0.833 | 0.751 |
| 183 | 0.948 | 0.747 | 0.793 | 0.827 | 0.742 |
| 184 | 0.954 | 0.762 | 0.796 | 0.835 | 0.754 |
| 185 | 0.968 | 0.744 | 0.784 | 0.829 | 0.745 |
| 186 | 0.954 | 0.755 | 0.787 | 0.829 | 0.745 |

|     |       |       |       |       |       |
|-----|-------|-------|-------|-------|-------|
| 187 | 0.945 | 0.744 | 0.784 | 0.822 | 0.734 |
| 188 | 0.948 | 0.731 | 0.784 | 0.818 | 0.729 |
| 189 | 0.954 | 0.747 | 0.790 | 0.828 | 0.743 |
| 190 | 0.962 | 0.749 | 0.775 | 0.827 | 0.741 |
| 191 | 0.951 | 0.752 | 0.781 | 0.826 | 0.740 |
| 192 | 0.951 | 0.726 | 0.787 | 0.818 | 0.730 |
| 193 | 0.965 | 0.752 | 0.799 | 0.836 | 0.755 |
| 194 | 0.965 | 0.749 | 0.769 | 0.826 | 0.739 |
| 195 | 0.951 | 0.749 | 0.772 | 0.822 | 0.734 |
| 196 | 0.960 | 0.744 | 0.784 | 0.827 | 0.741 |
| 197 | 0.954 | 0.736 | 0.799 | 0.827 | 0.742 |
| 198 | 0.960 | 0.765 | 0.769 | 0.829 | 0.744 |
| 199 | 0.945 | 0.755 | 0.781 | 0.825 | 0.738 |
| 200 | 0.962 | 0.742 | 0.790 | 0.828 | 0.744 |
| 201 | 0.954 | 0.749 | 0.775 | 0.824 | 0.737 |
| 202 | 0.960 | 0.747 | 0.766 | 0.822 | 0.734 |
| 203 | 0.957 | 0.755 | 0.781 | 0.828 | 0.744 |
| 204 | 0.957 | 0.749 | 0.772 | 0.824 | 0.737 |
| 205 | 0.962 | 0.742 | 0.766 | 0.821 | 0.733 |
| 206 | 0.957 | 0.752 | 0.763 | 0.822 | 0.734 |
| 207 | 0.954 | 0.755 | 0.760 | 0.821 | 0.732 |
| 208 | 0.954 | 0.744 | 0.781 | 0.824 | 0.737 |
| 209 | 0.957 | 0.747 | 0.760 | 0.819 | 0.729 |
| 210 | 0.951 | 0.747 | 0.760 | 0.817 | 0.727 |
| 211 | 0.960 | 0.760 | 0.766 | 0.827 | 0.740 |
| 212 | 0.960 | 0.757 | 0.772 | 0.828 | 0.742 |
| 213 | 0.948 | 0.744 | 0.784 | 0.823 | 0.736 |
| 214 | 0.951 | 0.760 | 0.757 | 0.821 | 0.732 |
| 215 | 0.954 | 0.747 | 0.772 | 0.822 | 0.734 |
| 216 | 0.954 | 0.742 | 0.781 | 0.823 | 0.736 |
| 217 | 0.945 | 0.744 | 0.778 | 0.820 | 0.731 |
| 218 | 0.962 | 0.749 | 0.769 | 0.825 | 0.738 |
| 219 | 0.968 | 0.749 | 0.754 | 0.822 | 0.733 |
| 220 | 0.968 | 0.742 | 0.775 | 0.826 | 0.740 |
| 221 | 0.960 | 0.744 | 0.772 | 0.823 | 0.735 |
| 222 | 0.960 | 0.744 | 0.784 | 0.827 | 0.741 |
| 223 | 0.957 | 0.747 | 0.766 | 0.821 | 0.732 |
| 224 | 0.957 | 0.749 | 0.751 | 0.817 | 0.726 |
| 225 | 0.962 | 0.742 | 0.751 | 0.816 | 0.725 |
| 226 | 0.962 | 0.752 | 0.754 | 0.821 | 0.732 |
| 227 | 0.965 | 0.755 | 0.760 | 0.825 | 0.737 |
| 228 | 0.957 | 0.742 | 0.793 | 0.828 | 0.743 |

|     |       |       |       |       |       |
|-----|-------|-------|-------|-------|-------|
| 229 | 0.968 | 0.749 | 0.754 | 0.822 | 0.733 |
| 230 | 0.960 | 0.752 | 0.778 | 0.828 | 0.742 |
| 231 | 0.962 | 0.747 | 0.757 | 0.820 | 0.731 |
| 232 | 0.968 | 0.749 | 0.763 | 0.825 | 0.738 |
| 233 | 0.957 | 0.752 | 0.766 | 0.823 | 0.735 |
| 234 | 0.962 | 0.749 | 0.769 | 0.825 | 0.738 |
| 235 | 0.962 | 0.721 | 0.775 | 0.816 | 0.726 |
| 236 | 0.962 | 0.736 | 0.766 | 0.819 | 0.730 |
| 237 | 0.960 | 0.773 | 0.772 | 0.833 | 0.750 |
| 238 | 0.965 | 0.767 | 0.763 | 0.830 | 0.746 |
| 239 | 0.960 | 0.775 | 0.772 | 0.834 | 0.751 |
| 240 | 0.965 | 0.773 | 0.763 | 0.832 | 0.748 |
| 241 | 0.968 | 0.775 | 0.775 | 0.838 | 0.757 |
| 242 | 0.968 | 0.767 | 0.778 | 0.836 | 0.754 |
| 243 | 0.965 | 0.788 | 0.772 | 0.841 | 0.761 |
| 244 | 0.960 | 0.760 | 0.784 | 0.832 | 0.749 |
| 245 | 0.957 | 0.765 | 0.769 | 0.828 | 0.743 |
| 246 | 0.962 | 0.767 | 0.778 | 0.834 | 0.752 |
| 247 | 0.965 | 0.775 | 0.778 | 0.838 | 0.757 |
| 248 | 0.968 | 0.780 | 0.769 | 0.838 | 0.757 |
| 249 | 0.971 | 0.767 | 0.746 | 0.827 | 0.740 |
| 250 | 0.962 | 0.775 | 0.760 | 0.831 | 0.747 |
| 251 | 0.957 | 0.765 | 0.784 | 0.833 | 0.750 |
| 252 | 0.957 | 0.773 | 0.781 | 0.835 | 0.753 |
| 253 | 0.968 | 0.773 | 0.763 | 0.833 | 0.750 |
| 254 | 0.957 | 0.765 | 0.772 | 0.829 | 0.744 |
| 255 | 0.960 | 0.783 | 0.796 | 0.844 | 0.767 |
| 256 | 0.962 | 0.775 | 0.769 | 0.834 | 0.751 |
| 257 | 0.960 | 0.767 | 0.766 | 0.829 | 0.744 |
| 258 | 0.962 | 0.775 | 0.751 | 0.828 | 0.743 |
| 259 | 0.962 | 0.767 | 0.781 | 0.835 | 0.753 |
| 260 | 0.962 | 0.778 | 0.760 | 0.832 | 0.748 |
| 261 | 0.971 | 0.762 | 0.766 | 0.831 | 0.747 |
| 262 | 0.957 | 0.755 | 0.802 | 0.835 | 0.754 |
| 263 | 0.962 | 0.775 | 0.775 | 0.836 | 0.754 |
| 264 | 0.962 | 0.778 | 0.766 | 0.834 | 0.751 |
| 265 | 0.971 | 0.780 | 0.766 | 0.838 | 0.757 |
| 266 | 0.968 | 0.773 | 0.760 | 0.832 | 0.748 |
| 267 | 0.960 | 0.773 | 0.763 | 0.830 | 0.746 |
| 268 | 0.965 | 0.775 | 0.784 | 0.840 | 0.760 |
| 269 | 0.965 | 0.755 | 0.781 | 0.831 | 0.748 |
| 270 | 0.962 | 0.786 | 0.778 | 0.841 | 0.761 |

|     |       |       |       |       |       |
|-----|-------|-------|-------|-------|-------|
| 271 | 0.965 | 0.775 | 0.772 | 0.836 | 0.754 |
| 272 | 0.965 | 0.783 | 0.760 | 0.835 | 0.752 |
| 273 | 0.962 | 0.775 | 0.784 | 0.839 | 0.759 |
| 274 | 0.954 | 0.773 | 0.763 | 0.828 | 0.743 |
| 275 | 0.960 | 0.757 | 0.790 | 0.833 | 0.751 |
| 276 | 0.968 | 0.770 | 0.772 | 0.835 | 0.753 |
| 277 | 0.957 | 0.757 | 0.778 | 0.828 | 0.743 |
| 278 | 0.965 | 0.770 | 0.757 | 0.829 | 0.744 |
| 279 | 0.957 | 0.767 | 0.751 | 0.824 | 0.736 |
| 280 | 0.957 | 0.773 | 0.772 | 0.832 | 0.749 |
| 281 | 0.960 | 0.755 | 0.772 | 0.827 | 0.741 |
| 282 | 0.968 | 0.770 | 0.763 | 0.832 | 0.748 |
| 283 | 0.962 | 0.778 | 0.772 | 0.836 | 0.754 |
| 284 | 0.968 | 0.773 | 0.760 | 0.832 | 0.748 |
| 285 | 0.968 | 0.775 | 0.781 | 0.840 | 0.760 |
| 286 | 0.960 | 0.778 | 0.754 | 0.829 | 0.744 |
| 287 | 0.957 | 0.755 | 0.778 | 0.828 | 0.742 |
| 288 | 0.971 | 0.773 | 0.763 | 0.834 | 0.751 |
| 289 | 0.965 | 0.770 | 0.763 | 0.831 | 0.747 |
| 290 | 0.965 | 0.755 | 0.775 | 0.829 | 0.745 |
| 291 | 0.962 | 0.757 | 0.778 | 0.830 | 0.746 |
| 292 | 0.957 | 0.783 | 0.749 | 0.828 | 0.742 |
| 293 | 0.965 | 0.778 | 0.760 | 0.833 | 0.750 |
| 294 | 0.974 | 0.767 | 0.757 | 0.831 | 0.747 |
| 295 | 0.960 | 0.775 | 0.740 | 0.824 | 0.735 |
| 296 | 0.965 | 0.755 | 0.775 | 0.829 | 0.745 |
| 297 | 0.965 | 0.747 | 0.787 | 0.830 | 0.747 |
| 298 | 0.957 | 0.778 | 0.775 | 0.835 | 0.753 |
| 299 | 0.960 | 0.780 | 0.760 | 0.832 | 0.748 |
| 300 | 0.960 | 0.765 | 0.784 | 0.834 | 0.752 |
| 301 | 0.954 | 0.786 | 0.760 | 0.832 | 0.748 |
| 302 | 0.965 | 0.780 | 0.775 | 0.839 | 0.758 |
| 303 | 0.960 | 0.773 | 0.781 | 0.836 | 0.754 |
| 304 | 0.962 | 0.752 | 0.790 | 0.832 | 0.749 |
| 305 | 0.960 | 0.767 | 0.751 | 0.825 | 0.737 |
| 306 | 0.962 | 0.744 | 0.781 | 0.827 | 0.741 |
| 307 | 0.960 | 0.773 | 0.772 | 0.833 | 0.750 |
| 308 | 0.957 | 0.773 | 0.781 | 0.835 | 0.753 |
| 309 | 0.960 | 0.736 | 0.796 | 0.828 | 0.743 |
| 310 | 0.965 | 0.762 | 0.790 | 0.837 | 0.756 |
| 311 | 0.968 | 0.760 | 0.793 | 0.838 | 0.758 |
| 312 | 0.962 | 0.744 | 0.790 | 0.829 | 0.746 |



|     |       |       |       |       |       |
|-----|-------|-------|-------|-------|-------|
| 313 | 0.968 | 0.762 | 0.763 | 0.829 | 0.744 |
| 314 | 0.960 | 0.755 | 0.784 | 0.830 | 0.746 |
| 315 | 0.962 | 0.765 | 0.760 | 0.828 | 0.741 |
| 316 | 0.960 | 0.760 | 0.790 | 0.834 | 0.752 |
| 317 | 0.965 | 0.757 | 0.775 | 0.830 | 0.746 |
| 318 | 0.960 | 0.762 | 0.769 | 0.828 | 0.743 |
| 319 | 0.954 | 0.757 | 0.760 | 0.822 | 0.733 |
| 320 | 0.965 | 0.767 | 0.775 | 0.834 | 0.751 |
| 321 | 0.968 | 0.760 | 0.743 | 0.822 | 0.733 |
| 322 | 0.957 | 0.755 | 0.799 | 0.834 | 0.752 |
| 323 | 0.965 | 0.767 | 0.781 | 0.836 | 0.754 |
| 324 | 0.948 | 0.762 | 0.787 | 0.830 | 0.746 |
| 325 | 0.965 | 0.762 | 0.766 | 0.829 | 0.744 |
| 326 | 0.965 | 0.749 | 0.778 | 0.828 | 0.744 |
| 327 | 0.954 | 0.757 | 0.760 | 0.822 | 0.733 |
| 328 | 0.948 | 0.780 | 0.749 | 0.825 | 0.737 |
| 329 | 0.960 | 0.752 | 0.796 | 0.833 | 0.751 |
| 330 | 0.957 | 0.770 | 0.787 | 0.836 | 0.754 |
| 331 | 0.957 | 0.767 | 0.784 | 0.834 | 0.752 |
| 332 | 0.960 | 0.770 | 0.784 | 0.836 | 0.754 |
| 333 | 0.965 | 0.767 | 0.781 | 0.836 | 0.754 |
| 334 | 0.954 | 0.752 | 0.754 | 0.818 | 0.727 |
| 335 | 0.965 | 0.765 | 0.778 | 0.834 | 0.752 |
| 336 | 0.962 | 0.770 | 0.763 | 0.830 | 0.746 |
| 337 | 0.951 | 0.770 | 0.775 | 0.830 | 0.746 |
| 338 | 0.960 | 0.778 | 0.778 | 0.837 | 0.755 |
| 339 | 0.962 | 0.757 | 0.763 | 0.826 | 0.739 |
| 340 | 0.965 | 0.724 | 0.790 | 0.823 | 0.736 |
| 341 | 0.965 | 0.757 | 0.808 | 0.841 | 0.762 |
| 342 | 0.962 | 0.752 | 0.772 | 0.827 | 0.741 |
| 343 | 0.960 | 0.755 | 0.790 | 0.832 | 0.750 |
| 344 | 0.954 | 0.739 | 0.778 | 0.821 | 0.733 |
| 345 | 0.962 | 0.760 | 0.784 | 0.833 | 0.750 |
| 346 | 0.951 | 0.760 | 0.772 | 0.826 | 0.739 |
| 347 | 0.965 | 0.760 | 0.793 | 0.837 | 0.756 |
| 348 | 0.960 | 0.749 | 0.799 | 0.833 | 0.751 |
| 349 | 0.951 | 0.770 | 0.787 | 0.834 | 0.752 |
| 350 | 0.957 | 0.762 | 0.778 | 0.830 | 0.746 |
| 351 | 0.968 | 0.760 | 0.772 | 0.831 | 0.747 |
| 352 | 0.962 | 0.767 | 0.778 | 0.834 | 0.752 |
| 353 | 0.962 | 0.770 | 0.746 | 0.825 | 0.737 |
| 354 | 0.948 | 0.765 | 0.772 | 0.827 | 0.740 |

|     |       |       |       |       |       |
|-----|-------|-------|-------|-------|-------|
| 355 | 0.962 | 0.770 | 0.772 | 0.833 | 0.750 |
| 356 | 0.968 | 0.786 | 0.754 | 0.835 | 0.752 |
| 357 | 0.957 | 0.752 | 0.760 | 0.821 | 0.732 |
| 358 | 0.954 | 0.770 | 0.763 | 0.828 | 0.741 |
| 359 | 0.951 | 0.770 | 0.772 | 0.829 | 0.744 |
| 360 | 0.957 | 0.773 | 0.760 | 0.828 | 0.743 |
| 361 | 0.962 | 0.765 | 0.769 | 0.830 | 0.746 |
| 362 | 0.954 | 0.752 | 0.769 | 0.823 | 0.735 |
| 363 | 0.960 | 0.757 | 0.766 | 0.826 | 0.739 |
| 364 | 0.974 | 0.744 | 0.760 | 0.824 | 0.736 |
| 365 | 0.957 | 0.760 | 0.760 | 0.824 | 0.736 |
| 366 | 0.962 | 0.755 | 0.769 | 0.827 | 0.741 |
| 367 | 0.965 | 0.749 | 0.784 | 0.830 | 0.747 |
| 368 | 0.957 | 0.739 | 0.769 | 0.819 | 0.730 |
| 369 | 0.945 | 0.778 | 0.763 | 0.828 | 0.741 |
| 370 | 0.974 | 0.734 | 0.802 | 0.833 | 0.752 |
| 371 | 0.948 | 0.762 | 0.784 | 0.829 | 0.745 |
| 372 | 0.962 | 0.778 | 0.778 | 0.838 | 0.757 |
| 373 | 0.954 | 0.757 | 0.769 | 0.825 | 0.738 |
| 374 | 0.962 | 0.760 | 0.781 | 0.832 | 0.749 |
| 375 | 0.951 | 0.755 | 0.775 | 0.825 | 0.738 |
| 376 | 0.960 | 0.742 | 0.760 | 0.818 | 0.728 |
| 377 | 0.954 | 0.755 | 0.766 | 0.823 | 0.735 |
| 378 | 0.954 | 0.762 | 0.772 | 0.828 | 0.742 |
| 379 | 0.951 | 0.762 | 0.772 | 0.827 | 0.740 |
| 380 | 0.951 | 0.755 | 0.746 | 0.815 | 0.723 |
| 381 | 0.965 | 0.767 | 0.760 | 0.829 | 0.744 |
| 382 | 0.951 | 0.765 | 0.769 | 0.827 | 0.740 |
| 383 | 0.957 | 0.775 | 0.763 | 0.830 | 0.746 |
| 384 | 0.962 | 0.760 | 0.778 | 0.831 | 0.748 |
| 385 | 0.951 | 0.773 | 0.784 | 0.834 | 0.752 |
| 386 | 0.962 | 0.755 | 0.772 | 0.828 | 0.742 |
| 387 | 0.962 | 0.767 | 0.778 | 0.834 | 0.752 |
| 388 | 0.951 | 0.765 | 0.787 | 0.832 | 0.749 |
| 389 | 0.957 | 0.757 | 0.766 | 0.825 | 0.738 |
| 390 | 0.948 | 0.762 | 0.778 | 0.828 | 0.742 |
| 391 | 0.954 | 0.749 | 0.772 | 0.823 | 0.735 |
| 392 | 0.960 | 0.767 | 0.763 | 0.828 | 0.743 |
| 393 | 0.954 | 0.762 | 0.793 | 0.834 | 0.752 |
| 394 | 0.960 | 0.752 | 0.778 | 0.828 | 0.742 |
| 395 | 0.971 | 0.775 | 0.775 | 0.839 | 0.759 |
| 396 | 0.954 | 0.767 | 0.760 | 0.826 | 0.739 |

|     |       |       |       |       |       |
|-----|-------|-------|-------|-------|-------|
| 397 | 0.960 | 0.760 | 0.769 | 0.828 | 0.742 |
| 398 | 0.957 | 0.760 | 0.778 | 0.829 | 0.745 |
| 399 | 0.957 | 0.742 | 0.790 | 0.827 | 0.742 |
| 400 | 0.954 | 0.757 | 0.793 | 0.832 | 0.749 |
| 401 | 0.962 | 0.775 | 0.763 | 0.832 | 0.748 |
| 402 | 0.965 | 0.783 | 0.763 | 0.836 | 0.754 |
| 403 | 0.957 | 0.760 | 0.790 | 0.833 | 0.751 |
| 404 | 0.971 | 0.744 | 0.769 | 0.826 | 0.739 |
| 405 | 0.948 | 0.765 | 0.787 | 0.831 | 0.748 |
| 406 | 0.960 | 0.749 | 0.802 | 0.834 | 0.753 |
| 407 | 0.960 | 0.765 | 0.781 | 0.833 | 0.750 |
| 408 | 0.968 | 0.765 | 0.778 | 0.835 | 0.753 |
| 409 | 0.962 | 0.744 | 0.775 | 0.825 | 0.738 |
| 410 | 0.962 | 0.770 | 0.778 | 0.835 | 0.753 |
| 411 | 0.957 | 0.773 | 0.775 | 0.833 | 0.750 |
| 412 | 0.951 | 0.773 | 0.790 | 0.836 | 0.755 |
| 413 | 0.957 | 0.765 | 0.775 | 0.830 | 0.746 |
| 414 | 0.954 | 0.773 | 0.802 | 0.841 | 0.762 |
| 415 | 0.948 | 0.755 | 0.772 | 0.823 | 0.735 |
| 416 | 0.948 | 0.739 | 0.778 | 0.819 | 0.730 |
| 417 | 0.951 | 0.755 | 0.784 | 0.828 | 0.742 |
| 418 | 0.954 | 0.749 | 0.787 | 0.828 | 0.743 |
| 419 | 0.939 | 0.762 | 0.787 | 0.828 | 0.742 |
| 420 | 0.942 | 0.767 | 0.749 | 0.818 | 0.727 |
| 421 | 0.939 | 0.721 | 0.799 | 0.816 | 0.727 |
| 422 | 0.948 | 0.775 | 0.766 | 0.828 | 0.743 |
| 423 | 0.957 | 0.783 | 0.769 | 0.835 | 0.753 |
| 424 | 0.954 | 0.773 | 0.766 | 0.829 | 0.744 |
| 425 | 0.931 | 0.773 | 0.775 | 0.825 | 0.738 |
| 426 | 0.957 | 0.770 | 0.763 | 0.828 | 0.743 |
| 427 | 0.931 | 0.775 | 0.775 | 0.826 | 0.739 |
| 428 | 0.951 | 0.780 | 0.760 | 0.829 | 0.744 |
| 429 | 0.945 | 0.757 | 0.778 | 0.825 | 0.738 |
| 430 | 0.945 | 0.775 | 0.781 | 0.832 | 0.749 |
| 431 | 0.945 | 0.755 | 0.775 | 0.823 | 0.735 |
| 432 | 0.954 | 0.770 | 0.778 | 0.832 | 0.749 |
| 433 | 0.948 | 0.770 | 0.757 | 0.824 | 0.736 |
| 434 | 0.957 | 0.783 | 0.754 | 0.830 | 0.745 |
| 435 | 0.965 | 0.765 | 0.766 | 0.830 | 0.746 |
| 436 | 0.942 | 0.762 | 0.769 | 0.823 | 0.735 |
| 437 | 0.945 | 0.760 | 0.787 | 0.828 | 0.744 |
| 438 | 0.948 | 0.757 | 0.775 | 0.825 | 0.738 |

|     |       |       |       |       |       |
|-----|-------|-------|-------|-------|-------|
| 439 | 0.948 | 0.755 | 0.769 | 0.822 | 0.734 |
| 440 | 0.957 | 0.773 | 0.793 | 0.839 | 0.759 |
| 441 | 0.942 | 0.762 | 0.772 | 0.824 | 0.736 |
| 442 | 0.960 | 0.773 | 0.757 | 0.828 | 0.743 |
| 443 | 0.971 | 0.767 | 0.754 | 0.829 | 0.744 |
| 444 | 0.954 | 0.739 | 0.790 | 0.825 | 0.739 |
| 445 | 0.951 | 0.749 | 0.796 | 0.829 | 0.746 |
| 446 | 0.948 | 0.770 | 0.775 | 0.829 | 0.745 |
| 447 | 0.962 | 0.765 | 0.790 | 0.837 | 0.756 |
| 448 | 0.954 | 0.762 | 0.781 | 0.830 | 0.746 |
| 449 | 0.942 | 0.773 | 0.749 | 0.820 | 0.730 |
| 450 | 0.954 | 0.783 | 0.751 | 0.828 | 0.743 |
| 451 | 0.954 | 0.765 | 0.751 | 0.822 | 0.733 |
| 452 | 0.957 | 0.773 | 0.793 | 0.839 | 0.759 |
| 453 | 0.957 | 0.762 | 0.775 | 0.829 | 0.745 |
| 454 | 0.948 | 0.773 | 0.754 | 0.824 | 0.736 |
| 455 | 0.957 | 0.765 | 0.766 | 0.828 | 0.742 |
| 456 | 0.945 | 0.744 | 0.781 | 0.821 | 0.733 |
| 457 | 0.951 | 0.757 | 0.766 | 0.823 | 0.735 |
| 458 | 0.948 | 0.747 | 0.769 | 0.819 | 0.730 |
| 459 | 0.960 | 0.749 | 0.754 | 0.819 | 0.729 |
| 460 | 0.954 | 0.765 | 0.781 | 0.831 | 0.748 |
| 461 | 0.954 | 0.760 | 0.754 | 0.821 | 0.732 |
| 462 | 0.957 | 0.755 | 0.749 | 0.818 | 0.727 |
| 463 | 0.954 | 0.755 | 0.784 | 0.828 | 0.744 |
| 464 | 0.960 | 0.767 | 0.766 | 0.829 | 0.744 |
| 465 | 0.957 | 0.757 | 0.769 | 0.826 | 0.739 |
| 466 | 0.951 | 0.773 | 0.778 | 0.832 | 0.749 |
| 467 | 0.954 | 0.755 | 0.757 | 0.820 | 0.730 |
| 468 | 0.942 | 0.773 | 0.772 | 0.828 | 0.742 |
| 469 | 0.945 | 0.762 | 0.751 | 0.818 | 0.728 |
| 470 | 0.960 | 0.742 | 0.778 | 0.824 | 0.737 |
| 471 | 0.954 | 0.762 | 0.763 | 0.825 | 0.737 |
| 472 | 0.954 | 0.755 | 0.772 | 0.825 | 0.738 |
| 473 | 0.948 | 0.747 | 0.793 | 0.827 | 0.742 |
| 474 | 0.962 | 0.744 | 0.781 | 0.827 | 0.741 |
| 475 | 0.945 | 0.760 | 0.802 | 0.833 | 0.751 |
| 476 | 0.939 | 0.713 | 0.793 | 0.812 | 0.720 |
| 477 | 0.957 | 0.744 | 0.769 | 0.821 | 0.732 |
| 478 | 0.960 | 0.765 | 0.775 | 0.831 | 0.747 |
| 479 | 0.962 | 0.749 | 0.760 | 0.822 | 0.733 |
| 480 | 0.942 | 0.755 | 0.760 | 0.817 | 0.726 |

|     |       |       |       |       |       |
|-----|-------|-------|-------|-------|-------|
| 481 | 0.948 | 0.762 | 0.778 | 0.828 | 0.742 |
| 482 | 0.936 | 0.760 | 0.754 | 0.815 | 0.723 |
| 483 | 0.936 | 0.752 | 0.751 | 0.812 | 0.718 |
| 484 | 0.942 | 0.778 | 0.757 | 0.825 | 0.737 |
| 485 | 0.934 | 0.742 | 0.749 | 0.806 | 0.709 |
| 486 | 0.954 | 0.780 | 0.778 | 0.836 | 0.754 |
| 487 | 0.942 | 0.773 | 0.778 | 0.829 | 0.744 |
| 488 | 0.934 | 0.755 | 0.757 | 0.813 | 0.721 |
| 489 | 0.931 | 0.762 | 0.772 | 0.820 | 0.731 |
| 490 | 0.934 | 0.744 | 0.746 | 0.806 | 0.709 |
| 491 | 0.939 | 0.760 | 0.740 | 0.812 | 0.717 |
| 492 | 0.919 | 0.762 | 0.754 | 0.811 | 0.716 |
| 493 | 0.942 | 0.739 | 0.769 | 0.814 | 0.723 |
| 494 | 0.934 | 0.757 | 0.775 | 0.820 | 0.731 |
| 495 | 0.957 | 0.762 | 0.766 | 0.827 | 0.740 |
| 496 | 0.939 | 0.762 | 0.772 | 0.823 | 0.735 |
| 497 | 0.939 | 0.780 | 0.766 | 0.828 | 0.741 |
| 498 | 0.934 | 0.760 | 0.749 | 0.813 | 0.719 |
| 499 | 0.928 | 0.760 | 0.772 | 0.818 | 0.728 |
| 500 | 0.925 | 0.767 | 0.769 | 0.819 | 0.729 |
| 501 | 0.931 | 0.765 | 0.784 | 0.825 | 0.738 |
| 502 | 0.948 | 0.762 | 0.793 | 0.832 | 0.749 |
| 503 | 0.942 | 0.752 | 0.766 | 0.818 | 0.728 |
| 504 | 0.928 | 0.736 | 0.787 | 0.814 | 0.723 |
| 505 | 0.942 | 0.770 | 0.769 | 0.826 | 0.739 |
| 506 | 0.939 | 0.760 | 0.766 | 0.820 | 0.730 |
| 507 | 0.934 | 0.765 | 0.793 | 0.828 | 0.744 |
| 508 | 0.934 | 0.757 | 0.787 | 0.824 | 0.737 |
| 509 | 0.905 | 0.760 | 0.784 | 0.814 | 0.723 |
| 510 | 0.922 | 0.760 | 0.772 | 0.816 | 0.725 |
| 511 | 0.925 | 0.762 | 0.787 | 0.823 | 0.735 |
| 512 | 0.922 | 0.760 | 0.775 | 0.817 | 0.727 |
| 513 | 0.928 | 0.767 | 0.772 | 0.821 | 0.732 |
| 514 | 0.934 | 0.778 | 0.796 | 0.834 | 0.752 |
| 515 | 0.931 | 0.760 | 0.763 | 0.816 | 0.725 |
| 516 | 0.928 | 0.773 | 0.763 | 0.820 | 0.730 |
| 517 | 0.928 | 0.760 | 0.781 | 0.821 | 0.732 |
| 518 | 0.922 | 0.767 | 0.787 | 0.824 | 0.737 |
| 519 | 0.936 | 0.739 | 0.793 | 0.820 | 0.732 |
| 520 | 0.919 | 0.770 | 0.787 | 0.824 | 0.737 |
| 521 | 0.928 | 0.775 | 0.751 | 0.817 | 0.726 |
| 522 | 0.939 | 0.749 | 0.763 | 0.815 | 0.724 |

|     |       |       |       |       |       |
|-----|-------|-------|-------|-------|-------|
| 523 | 0.928 | 0.775 | 0.796 | 0.831 | 0.748 |
| 524 | 0.939 | 0.767 | 0.763 | 0.822 | 0.733 |
| 525 | 0.936 | 0.770 | 0.787 | 0.829 | 0.745 |
| 526 | 0.939 | 0.773 | 0.778 | 0.828 | 0.743 |
| 527 | 0.919 | 0.749 | 0.784 | 0.815 | 0.725 |
| 528 | 0.939 | 0.765 | 0.772 | 0.824 | 0.736 |
| 529 | 0.942 | 0.765 | 0.805 | 0.835 | 0.754 |
| 530 | 0.919 | 0.760 | 0.787 | 0.820 | 0.731 |
| 531 | 0.916 | 0.734 | 0.796 | 0.813 | 0.721 |
| 532 | 0.936 | 0.744 | 0.793 | 0.822 | 0.734 |
| 533 | 0.928 | 0.778 | 0.763 | 0.822 | 0.733 |
| 534 | 0.922 | 0.767 | 0.778 | 0.821 | 0.732 |
| 535 | 0.931 | 0.778 | 0.775 | 0.827 | 0.740 |
| 536 | 0.916 | 0.765 | 0.757 | 0.812 | 0.718 |
| 537 | 0.928 | 0.757 | 0.781 | 0.820 | 0.731 |
| 538 | 0.925 | 0.760 | 0.796 | 0.825 | 0.738 |
| 539 | 0.931 | 0.762 | 0.766 | 0.818 | 0.728 |
| 540 | 0.919 | 0.755 | 0.760 | 0.810 | 0.716 |
| 541 | 0.931 | 0.752 | 0.778 | 0.818 | 0.728 |
| 542 | 0.939 | 0.739 | 0.754 | 0.809 | 0.714 |
| 543 | 0.905 | 0.734 | 0.772 | 0.801 | 0.704 |
| 544 | 0.913 | 0.752 | 0.787 | 0.815 | 0.725 |
| 545 | 0.922 | 0.747 | 0.802 | 0.821 | 0.734 |
| 546 | 0.913 | 0.773 | 0.766 | 0.816 | 0.725 |
| 547 | 0.934 | 0.762 | 0.757 | 0.816 | 0.725 |
| 548 | 0.925 | 0.747 | 0.784 | 0.816 | 0.726 |
| 549 | 0.939 | 0.747 | 0.784 | 0.821 | 0.733 |
| 550 | 0.919 | 0.736 | 0.802 | 0.816 | 0.727 |
| 551 | 0.925 | 0.770 | 0.763 | 0.818 | 0.728 |
| 552 | 0.928 | 0.770 | 0.769 | 0.821 | 0.732 |
| 553 | 0.913 | 0.757 | 0.749 | 0.805 | 0.708 |
| 554 | 0.919 | 0.757 | 0.799 | 0.823 | 0.736 |
| 555 | 0.931 | 0.747 | 0.778 | 0.816 | 0.726 |
| 556 | 0.931 | 0.724 | 0.766 | 0.804 | 0.708 |
| 557 | 0.925 | 0.747 | 0.769 | 0.812 | 0.719 |
| 558 | 0.945 | 0.742 | 0.760 | 0.813 | 0.721 |
| 559 | 0.928 | 0.736 | 0.802 | 0.819 | 0.731 |
| 560 | 0.913 | 0.765 | 0.787 | 0.820 | 0.731 |
| 561 | 0.916 | 0.739 | 0.784 | 0.811 | 0.718 |
| 562 | 0.928 | 0.739 | 0.757 | 0.806 | 0.710 |
| 563 | 0.905 | 0.770 | 0.754 | 0.809 | 0.714 |
| 564 | 0.913 | 0.749 | 0.808 | 0.821 | 0.734 |

|     |       |       |       |       |       |
|-----|-------|-------|-------|-------|-------|
| 565 | 0.922 | 0.752 | 0.775 | 0.814 | 0.723 |
| 566 | 0.928 | 0.734 | 0.778 | 0.811 | 0.718 |
| 567 | 0.925 | 0.770 | 0.751 | 0.814 | 0.722 |
| 568 | 0.925 | 0.749 | 0.760 | 0.810 | 0.715 |
| 569 | 0.925 | 0.729 | 0.781 | 0.809 | 0.715 |
| 570 | 0.925 | 0.742 | 0.796 | 0.818 | 0.729 |
| 571 | 0.919 | 0.760 | 0.751 | 0.809 | 0.714 |
| 572 | 0.931 | 0.739 | 0.793 | 0.818 | 0.729 |
| 573 | 0.925 | 0.749 | 0.769 | 0.813 | 0.720 |
| 574 | 0.939 | 0.757 | 0.763 | 0.818 | 0.728 |
| 575 | 0.931 | 0.734 | 0.790 | 0.815 | 0.725 |
| 576 | 0.934 | 0.757 | 0.772 | 0.819 | 0.729 |
| 577 | 0.925 | 0.731 | 0.781 | 0.810 | 0.717 |
| 578 | 0.934 | 0.770 | 0.769 | 0.823 | 0.735 |
| 579 | 0.931 | 0.760 | 0.784 | 0.823 | 0.735 |
| 580 | 0.936 | 0.724 | 0.763 | 0.805 | 0.709 |
| 581 | 0.936 | 0.752 | 0.760 | 0.814 | 0.722 |
| 582 | 0.931 | 0.742 | 0.763 | 0.810 | 0.716 |
| 583 | 0.931 | 0.747 | 0.754 | 0.809 | 0.714 |
| 584 | 0.928 | 0.757 | 0.760 | 0.813 | 0.721 |
| 585 | 0.931 | 0.770 | 0.775 | 0.824 | 0.736 |
| 586 | 0.931 | 0.742 | 0.790 | 0.818 | 0.729 |
| 587 | 0.928 | 0.742 | 0.778 | 0.813 | 0.722 |
| 588 | 0.931 | 0.742 | 0.769 | 0.812 | 0.719 |
| 589 | 0.919 | 0.757 | 0.775 | 0.815 | 0.724 |
| 590 | 0.919 | 0.739 | 0.790 | 0.813 | 0.722 |
| 591 | 0.919 | 0.755 | 0.740 | 0.803 | 0.705 |
| 592 | 0.934 | 0.705 | 0.766 | 0.799 | 0.700 |
| 593 | 0.945 | 0.744 | 0.772 | 0.818 | 0.728 |
| 594 | 0.922 | 0.742 | 0.787 | 0.814 | 0.723 |
| 595 | 0.934 | 0.757 | 0.772 | 0.819 | 0.729 |
| 596 | 0.922 | 0.744 | 0.769 | 0.810 | 0.716 |
| 597 | 0.928 | 0.736 | 0.763 | 0.807 | 0.712 |
| 598 | 0.919 | 0.734 | 0.781 | 0.809 | 0.715 |
| 599 | 0.934 | 0.752 | 0.784 | 0.821 | 0.733 |
| 600 | 0.925 | 0.734 | 0.772 | 0.808 | 0.714 |
| 601 | 0.936 | 0.770 | 0.743 | 0.815 | 0.723 |
| 602 | 0.919 | 0.747 | 0.769 | 0.810 | 0.716 |
| 603 | 0.931 | 0.721 | 0.781 | 0.808 | 0.714 |
| 604 | 0.919 | 0.755 | 0.757 | 0.809 | 0.714 |
| 605 | 0.928 | 0.747 | 0.775 | 0.814 | 0.723 |
| 606 | 0.931 | 0.747 | 0.757 | 0.810 | 0.715 |

|     |       |       |       |       |       |
|-----|-------|-------|-------|-------|-------|
| 607 | 0.925 | 0.734 | 0.760 | 0.804 | 0.707 |
| 608 | 0.922 | 0.739 | 0.757 | 0.804 | 0.707 |
| 609 | 0.939 | 0.752 | 0.769 | 0.818 | 0.728 |
| 610 | 0.902 | 0.744 | 0.772 | 0.804 | 0.708 |
| 611 | 0.928 | 0.731 | 0.790 | 0.813 | 0.722 |
| 612 | 0.928 | 0.747 | 0.772 | 0.813 | 0.721 |
| 613 | 0.913 | 0.760 | 0.760 | 0.810 | 0.715 |
| 614 | 0.916 | 0.742 | 0.775 | 0.809 | 0.715 |
| 615 | 0.916 | 0.744 | 0.772 | 0.809 | 0.715 |
| 616 | 0.913 | 0.734 | 0.769 | 0.803 | 0.706 |
| 617 | 0.905 | 0.731 | 0.775 | 0.801 | 0.704 |
| 618 | 0.919 | 0.770 | 0.769 | 0.818 | 0.728 |
| 619 | 0.922 | 0.749 | 0.766 | 0.811 | 0.717 |
| 620 | 0.936 | 0.747 | 0.769 | 0.815 | 0.724 |
| 621 | 0.916 | 0.747 | 0.763 | 0.807 | 0.711 |
| 622 | 0.910 | 0.760 | 0.766 | 0.811 | 0.717 |
| 623 | 0.902 | 0.726 | 0.757 | 0.793 | 0.691 |
| 624 | 0.925 | 0.731 | 0.754 | 0.801 | 0.703 |
| 625 | 0.916 | 0.742 | 0.775 | 0.809 | 0.715 |
| 626 | 0.908 | 0.755 | 0.778 | 0.812 | 0.719 |
| 627 | 0.919 | 0.744 | 0.781 | 0.813 | 0.720 |
| 628 | 0.910 | 0.747 | 0.769 | 0.807 | 0.712 |
| 629 | 0.925 | 0.734 | 0.781 | 0.811 | 0.718 |
| 630 | 0.910 | 0.716 | 0.784 | 0.800 | 0.704 |
| 631 | 0.925 | 0.757 | 0.772 | 0.816 | 0.725 |
| 632 | 0.910 | 0.736 | 0.769 | 0.803 | 0.706 |
| 633 | 0.922 | 0.731 | 0.766 | 0.804 | 0.708 |
| 634 | 0.925 | 0.755 | 0.749 | 0.808 | 0.712 |
| 635 | 0.905 | 0.726 | 0.760 | 0.795 | 0.694 |
| 636 | 0.931 | 0.747 | 0.769 | 0.813 | 0.721 |
| 637 | 0.908 | 0.744 | 0.760 | 0.802 | 0.705 |
| 638 | 0.931 | 0.749 | 0.787 | 0.820 | 0.731 |
| 639 | 0.916 | 0.755 | 0.760 | 0.809 | 0.714 |
| 640 | 0.942 | 0.757 | 0.757 | 0.817 | 0.726 |
| 641 | 0.919 | 0.765 | 0.763 | 0.814 | 0.722 |
| 642 | 0.922 | 0.718 | 0.757 | 0.797 | 0.696 |
| 643 | 0.931 | 0.742 | 0.766 | 0.811 | 0.717 |
| 644 | 0.910 | 0.744 | 0.790 | 0.813 | 0.721 |
| 645 | 0.925 | 0.695 | 0.769 | 0.793 | 0.692 |
| 646 | 0.922 | 0.708 | 0.778 | 0.799 | 0.702 |
| 647 | 0.919 | 0.749 | 0.778 | 0.813 | 0.722 |
| 648 | 0.910 | 0.760 | 0.749 | 0.805 | 0.708 |



|     |       |       |       |       |       |
|-----|-------|-------|-------|-------|-------|
| 649 | 0.922 | 0.755 | 0.802 | 0.824 | 0.737 |
| 650 | 0.922 | 0.765 | 0.769 | 0.817 | 0.726 |
| 651 | 0.919 | 0.731 | 0.787 | 0.810 | 0.717 |
| 652 | 0.916 | 0.752 | 0.751 | 0.805 | 0.708 |
| 653 | 0.934 | 0.755 | 0.757 | 0.813 | 0.721 |
| 654 | 0.928 | 0.749 | 0.757 | 0.810 | 0.715 |
| 655 | 0.910 | 0.749 | 0.763 | 0.806 | 0.710 |
| 656 | 0.928 | 0.765 | 0.749 | 0.813 | 0.719 |
| 657 | 0.910 | 0.736 | 0.772 | 0.804 | 0.708 |
| 658 | 0.908 | 0.749 | 0.760 | 0.804 | 0.707 |
| 659 | 0.925 | 0.765 | 0.757 | 0.814 | 0.722 |
| 660 | 0.919 | 0.760 | 0.763 | 0.813 | 0.719 |
| 661 | 0.922 | 0.747 | 0.772 | 0.812 | 0.718 |
| 662 | 0.919 | 0.765 | 0.734 | 0.805 | 0.707 |
| 663 | 0.910 | 0.744 | 0.772 | 0.807 | 0.712 |
| 664 | 0.922 | 0.705 | 0.778 | 0.799 | 0.701 |
| 665 | 0.916 | 0.736 | 0.778 | 0.808 | 0.714 |
| 666 | 0.919 | 0.736 | 0.763 | 0.804 | 0.708 |
| 667 | 0.910 | 0.739 | 0.754 | 0.799 | 0.700 |
| 668 | 0.928 | 0.747 | 0.778 | 0.815 | 0.724 |
| 669 | 0.916 | 0.742 | 0.751 | 0.801 | 0.703 |
| 670 | 0.913 | 0.747 | 0.781 | 0.812 | 0.719 |
| 671 | 0.939 | 0.749 | 0.751 | 0.812 | 0.718 |
| 672 | 0.899 | 0.718 | 0.787 | 0.799 | 0.701 |
| 673 | 0.919 | 0.762 | 0.743 | 0.807 | 0.710 |
| 674 | 0.910 | 0.734 | 0.787 | 0.808 | 0.714 |
| 675 | 0.922 | 0.724 | 0.772 | 0.803 | 0.707 |
| 676 | 0.910 | 0.724 | 0.784 | 0.803 | 0.707 |
| 677 | 0.922 | 0.760 | 0.781 | 0.819 | 0.730 |
| 678 | 0.905 | 0.729 | 0.772 | 0.799 | 0.701 |
| 679 | 0.916 | 0.711 | 0.787 | 0.801 | 0.705 |
| 680 | 0.887 | 0.742 | 0.760 | 0.795 | 0.694 |
| 681 | 0.902 | 0.734 | 0.790 | 0.806 | 0.712 |
| 682 | 0.913 | 0.731 | 0.754 | 0.798 | 0.698 |
| 683 | 0.910 | 0.739 | 0.787 | 0.810 | 0.717 |
| 684 | 0.919 | 0.755 | 0.781 | 0.816 | 0.725 |
| 685 | 0.910 | 0.747 | 0.787 | 0.813 | 0.721 |
| 686 | 0.919 | 0.731 | 0.751 | 0.799 | 0.699 |
| 687 | 0.928 | 0.724 | 0.787 | 0.810 | 0.717 |
| 688 | 0.922 | 0.742 | 0.781 | 0.813 | 0.720 |
| 689 | 0.910 | 0.749 | 0.772 | 0.809 | 0.714 |
| 690 | 0.936 | 0.742 | 0.757 | 0.810 | 0.715 |

|     |       |       |       |       |       |
|-----|-------|-------|-------|-------|-------|
| 691 | 0.905 | 0.742 | 0.760 | 0.800 | 0.702 |
| 692 | 0.905 | 0.752 | 0.769 | 0.807 | 0.712 |
| 693 | 0.908 | 0.731 | 0.760 | 0.798 | 0.698 |
| 694 | 0.905 | 0.742 | 0.749 | 0.797 | 0.696 |
| 695 | 0.922 | 0.731 | 0.775 | 0.807 | 0.712 |
| 696 | 0.925 | 0.729 | 0.763 | 0.803 | 0.706 |
| 697 | 0.908 | 0.747 | 0.763 | 0.804 | 0.707 |
| 698 | 0.928 | 0.724 | 0.775 | 0.806 | 0.711 |
| 699 | 0.910 | 0.718 | 0.769 | 0.797 | 0.697 |
| 700 | 0.913 | 0.729 | 0.766 | 0.800 | 0.702 |
| 701 | 0.902 | 0.731 | 0.754 | 0.794 | 0.692 |
| 702 | 0.916 | 0.731 | 0.751 | 0.798 | 0.697 |
| 703 | 0.908 | 0.744 | 0.772 | 0.806 | 0.710 |
| 704 | 0.899 | 0.724 | 0.772 | 0.796 | 0.696 |
| 705 | 0.922 | 0.755 | 0.743 | 0.805 | 0.708 |
| 706 | 0.905 | 0.752 | 0.763 | 0.805 | 0.709 |
| 707 | 0.916 | 0.755 | 0.781 | 0.815 | 0.724 |
| 708 | 0.928 | 0.742 | 0.760 | 0.808 | 0.713 |
| 709 | 0.934 | 0.711 | 0.784 | 0.806 | 0.712 |
| 710 | 0.928 | 0.739 | 0.763 | 0.808 | 0.713 |
| 711 | 0.905 | 0.744 | 0.769 | 0.804 | 0.708 |
| 712 | 0.934 | 0.744 | 0.763 | 0.812 | 0.718 |
| 713 | 0.925 | 0.760 | 0.749 | 0.810 | 0.715 |
| 714 | 0.945 | 0.744 | 0.772 | 0.818 | 0.728 |
| 715 | 0.902 | 0.752 | 0.757 | 0.802 | 0.704 |
| 716 | 0.913 | 0.749 | 0.772 | 0.810 | 0.716 |
| 717 | 0.922 | 0.744 | 0.757 | 0.806 | 0.710 |
| 718 | 0.913 | 0.736 | 0.760 | 0.801 | 0.703 |
| 719 | 0.908 | 0.739 | 0.787 | 0.809 | 0.715 |
| 720 | 0.896 | 0.749 | 0.760 | 0.800 | 0.702 |
| 721 | 0.922 | 0.721 | 0.781 | 0.805 | 0.710 |
| 722 | 0.905 | 0.770 | 0.757 | 0.810 | 0.715 |
| 723 | 0.916 | 0.757 | 0.751 | 0.807 | 0.711 |
| 724 | 0.922 | 0.755 | 0.778 | 0.816 | 0.726 |
| 725 | 0.919 | 0.724 | 0.769 | 0.801 | 0.704 |
| 726 | 0.916 | 0.742 | 0.805 | 0.818 | 0.730 |
| 727 | 0.905 | 0.747 | 0.790 | 0.812 | 0.719 |
| 728 | 0.916 | 0.752 | 0.749 | 0.804 | 0.707 |
| 729 | 0.919 | 0.731 | 0.772 | 0.805 | 0.709 |
| 730 | 0.910 | 0.742 | 0.766 | 0.804 | 0.707 |
| 731 | 0.931 | 0.734 | 0.784 | 0.813 | 0.722 |
| 732 | 0.905 | 0.736 | 0.769 | 0.801 | 0.704 |

|     |       |       |       |       |       |
|-----|-------|-------|-------|-------|-------|
| 733 | 0.925 | 0.711 | 0.772 | 0.799 | 0.701 |
| 734 | 0.936 | 0.744 | 0.760 | 0.812 | 0.718 |
| 735 | 0.913 | 0.724 | 0.799 | 0.809 | 0.716 |
| 736 | 0.916 | 0.744 | 0.778 | 0.811 | 0.717 |
| 737 | 0.899 | 0.726 | 0.766 | 0.795 | 0.694 |
| 738 | 0.919 | 0.744 | 0.769 | 0.809 | 0.714 |
| 739 | 0.913 | 0.747 | 0.775 | 0.810 | 0.716 |
| 740 | 0.908 | 0.690 | 0.769 | 0.785 | 0.682 |
| 741 | 0.910 | 0.713 | 0.787 | 0.800 | 0.704 |
| 742 | 0.925 | 0.729 | 0.772 | 0.806 | 0.711 |
| 743 | 0.919 | 0.726 | 0.781 | 0.806 | 0.711 |
| 744 | 0.890 | 0.734 | 0.751 | 0.790 | 0.686 |
| 745 | 0.942 | 0.721 | 0.760 | 0.805 | 0.709 |
| 746 | 0.919 | 0.734 | 0.760 | 0.802 | 0.705 |
| 747 | 0.908 | 0.713 | 0.757 | 0.790 | 0.687 |
| 748 | 0.893 | 0.744 | 0.775 | 0.802 | 0.705 |
| 749 | 0.910 | 0.731 | 0.751 | 0.796 | 0.695 |
| 750 | 0.910 | 0.708 | 0.772 | 0.794 | 0.693 |
| 751 | 0.919 | 0.739 | 0.772 | 0.808 | 0.713 |
| 752 | 0.922 | 0.744 | 0.754 | 0.805 | 0.708 |
| 753 | 0.908 | 0.752 | 0.769 | 0.808 | 0.713 |
| 754 | 0.919 | 0.726 | 0.772 | 0.803 | 0.707 |
| 755 | 0.908 | 0.736 | 0.763 | 0.800 | 0.702 |
| 756 | 0.916 | 0.731 | 0.772 | 0.804 | 0.708 |
| 757 | 0.910 | 0.726 | 0.760 | 0.797 | 0.697 |
| 758 | 0.934 | 0.747 | 0.763 | 0.813 | 0.720 |
| 759 | 0.925 | 0.716 | 0.760 | 0.798 | 0.698 |
| 760 | 0.910 | 0.734 | 0.754 | 0.798 | 0.698 |
| 761 | 0.913 | 0.716 | 0.737 | 0.786 | 0.681 |
| 762 | 0.908 | 0.734 | 0.766 | 0.800 | 0.702 |
| 763 | 0.916 | 0.731 | 0.757 | 0.799 | 0.700 |
| 764 | 0.916 | 0.729 | 0.784 | 0.807 | 0.713 |
| 765 | 0.910 | 0.739 | 0.772 | 0.805 | 0.709 |
| 766 | 0.913 | 0.716 | 0.772 | 0.798 | 0.698 |
| 767 | 0.922 | 0.744 | 0.784 | 0.814 | 0.723 |
| 768 | 0.902 | 0.755 | 0.757 | 0.803 | 0.705 |
| 769 | 0.890 | 0.736 | 0.754 | 0.792 | 0.689 |
| 770 | 0.910 | 0.729 | 0.769 | 0.800 | 0.702 |
| 771 | 0.908 | 0.742 | 0.769 | 0.804 | 0.707 |
| 772 | 0.922 | 0.747 | 0.763 | 0.809 | 0.714 |
| 773 | 0.919 | 0.705 | 0.778 | 0.798 | 0.699 |
| 774 | 0.896 | 0.729 | 0.754 | 0.791 | 0.688 |

|                            |           |             |          |            |            |
|----------------------------|-----------|-------------|----------|------------|------------|
| 775                        | 0.922     | 0.736       | 0.763    | 0.805      | 0.709      |
| 776                        | 0.905     | 0.736       | 0.754    | 0.797      | 0.696      |
| 777                        | 0.928     | 0.721       | 0.793    | 0.811      | 0.719      |
| 778                        | 0.905     | 0.742       | 0.757    | 0.799      | 0.700      |
| 779                        | 0.928     | 0.739       | 0.760    | 0.807      | 0.711      |
| 780                        | 0.916     | 0.757       | 0.731    | 0.800      | 0.700      |
| 781                        | 0.925     | 0.677       | 0.766    | 0.785      | 0.682      |
| 782                        | 0.905     | 0.713       | 0.772    | 0.794      | 0.693      |
| 783                        | 0.922     | 0.718       | 0.766    | 0.799      | 0.701      |
| 784                        | 0.910     | 0.747       | 0.749    | 0.800      | 0.701      |
| 785                        | 0.893     | 0.729       | 0.775    | 0.797      | 0.697      |
| 786                        | 0.919     | 0.700       | 0.766    | 0.792      | 0.691      |
| 787                        | 0.908     | 0.731       | 0.754    | 0.796      | 0.695      |
| 788                        | 0.925     | 0.711       | 0.769    | 0.799      | 0.700      |
| <b>MCFS</b>                |           |             |          |            |            |
| <b>Numbers of features</b> | <b>G1</b> | <b>G2/M</b> | <b>S</b> | <b>ACC</b> | <b>MCC</b> |
| 1                          | 0.913     | 0.630       | 0.557    | 0.699      | 0.549      |
| 2                          | 0.908     | 0.729       | 0.650    | 0.762      | 0.643      |
| 3                          | 0.954     | 0.690       | 0.698    | 0.778      | 0.668      |
| 4                          | 0.948     | 0.690       | 0.716    | 0.782      | 0.674      |
| 5                          | 0.960     | 0.695       | 0.716    | 0.787      | 0.682      |
| 6                          | 0.954     | 0.700       | 0.707    | 0.784      | 0.678      |
| 7                          | 0.960     | 0.700       | 0.707    | 0.786      | 0.680      |
| 8                          | 0.957     | 0.716       | 0.704    | 0.790      | 0.685      |
| 9                          | 0.954     | 0.726       | 0.710    | 0.795      | 0.692      |
| 10                         | 0.960     | 0.729       | 0.713    | 0.799      | 0.698      |
| 11                         | 0.954     | 0.724       | 0.731    | 0.800      | 0.701      |
| 12                         | 0.960     | 0.788       | 0.781    | 0.842      | 0.763      |
| 13                         | 0.968     | 0.791       | 0.790    | 0.848      | 0.772      |
| 14                         | 0.968     | 0.791       | 0.790    | 0.848      | 0.772      |
| 15                         | 0.965     | 0.801       | 0.787    | 0.850      | 0.775      |
| 16                         | 0.954     | 0.798       | 0.790    | 0.846      | 0.769      |
| 17                         | 0.957     | 0.798       | 0.802    | 0.851      | 0.777      |
| 18                         | 0.960     | 0.778       | 0.787    | 0.840      | 0.760      |
| 19                         | 0.954     | 0.788       | 0.799    | 0.845      | 0.769      |
| 20                         | 0.960     | 0.806       | 0.811    | 0.858      | 0.787      |
| 21                         | 0.960     | 0.793       | 0.823    | 0.857      | 0.786      |
| 22                         | 0.960     | 0.793       | 0.799    | 0.849      | 0.774      |
| 23                         | 0.968     | 0.798       | 0.784    | 0.849      | 0.774      |
| 24                         | 0.951     | 0.775       | 0.787    | 0.836      | 0.755      |
| 25                         | 0.965     | 0.801       | 0.784    | 0.849      | 0.774      |
| 26                         | 0.960     | 0.778       | 0.796    | 0.843      | 0.764      |

|    |       |       |       |       |       |
|----|-------|-------|-------|-------|-------|
| 27 | 0.965 | 0.814 | 0.766 | 0.848 | 0.772 |
| 28 | 0.965 | 0.801 | 0.781 | 0.848 | 0.772 |
| 29 | 0.965 | 0.814 | 0.787 | 0.855 | 0.782 |
| 30 | 0.962 | 0.811 | 0.790 | 0.854 | 0.781 |
| 31 | 0.965 | 0.804 | 0.811 | 0.858 | 0.788 |
| 32 | 0.965 | 0.824 | 0.796 | 0.861 | 0.792 |
| 33 | 0.965 | 0.814 | 0.793 | 0.857 | 0.785 |
| 34 | 0.962 | 0.824 | 0.796 | 0.860 | 0.790 |
| 35 | 0.962 | 0.811 | 0.790 | 0.854 | 0.781 |
| 36 | 0.965 | 0.817 | 0.781 | 0.854 | 0.780 |
| 37 | 0.960 | 0.819 | 0.784 | 0.854 | 0.780 |
| 38 | 0.971 | 0.809 | 0.793 | 0.857 | 0.785 |
| 39 | 0.957 | 0.809 | 0.805 | 0.856 | 0.784 |
| 40 | 0.968 | 0.806 | 0.793 | 0.855 | 0.782 |
| 41 | 0.960 | 0.822 | 0.784 | 0.855 | 0.782 |
| 42 | 0.968 | 0.827 | 0.793 | 0.862 | 0.793 |
| 43 | 0.965 | 0.822 | 0.802 | 0.862 | 0.793 |
| 44 | 0.971 | 0.819 | 0.811 | 0.866 | 0.799 |
| 45 | 0.971 | 0.819 | 0.832 | 0.873 | 0.809 |
| 46 | 0.977 | 0.827 | 0.793 | 0.865 | 0.797 |
| 47 | 0.968 | 0.819 | 0.820 | 0.868 | 0.802 |
| 48 | 0.968 | 0.835 | 0.805 | 0.869 | 0.803 |
| 49 | 0.965 | 0.837 | 0.805 | 0.869 | 0.803 |
| 50 | 0.968 | 0.837 | 0.811 | 0.872 | 0.807 |
| 51 | 0.968 | 0.835 | 0.823 | 0.874 | 0.812 |
| 52 | 0.965 | 0.842 | 0.826 | 0.877 | 0.816 |
| 53 | 0.971 | 0.835 | 0.811 | 0.872 | 0.807 |
| 54 | 0.968 | 0.840 | 0.823 | 0.876 | 0.814 |
| 55 | 0.974 | 0.827 | 0.805 | 0.868 | 0.802 |
| 56 | 0.971 | 0.835 | 0.799 | 0.868 | 0.802 |
| 57 | 0.968 | 0.829 | 0.823 | 0.873 | 0.809 |
| 58 | 0.974 | 0.835 | 0.826 | 0.877 | 0.816 |
| 59 | 0.971 | 0.837 | 0.826 | 0.877 | 0.816 |
| 60 | 0.965 | 0.819 | 0.832 | 0.871 | 0.806 |
| 61 | 0.980 | 0.837 | 0.805 | 0.873 | 0.810 |
| 62 | 0.965 | 0.832 | 0.814 | 0.870 | 0.805 |
| 63 | 0.977 | 0.829 | 0.811 | 0.872 | 0.807 |
| 64 | 0.971 | 0.827 | 0.844 | 0.879 | 0.819 |
| 65 | 0.971 | 0.817 | 0.832 | 0.872 | 0.808 |
| 66 | 0.962 | 0.837 | 0.832 | 0.876 | 0.815 |
| 67 | 0.968 | 0.824 | 0.844 | 0.877 | 0.817 |
| 68 | 0.974 | 0.829 | 0.829 | 0.876 | 0.815 |

|     |       |       |       |       |       |
|-----|-------|-------|-------|-------|-------|
| 69  | 0.977 | 0.827 | 0.835 | 0.878 | 0.818 |
| 70  | 0.971 | 0.835 | 0.838 | 0.880 | 0.820 |
| 71  | 0.968 | 0.822 | 0.844 | 0.876 | 0.815 |
| 72  | 0.971 | 0.824 | 0.826 | 0.873 | 0.809 |
| 73  | 0.968 | 0.824 | 0.841 | 0.876 | 0.815 |
| 74  | 0.971 | 0.822 | 0.838 | 0.875 | 0.814 |
| 75  | 0.968 | 0.832 | 0.811 | 0.870 | 0.805 |
| 76  | 0.983 | 0.829 | 0.835 | 0.881 | 0.822 |
| 77  | 0.968 | 0.829 | 0.799 | 0.865 | 0.797 |
| 78  | 0.971 | 0.796 | 0.826 | 0.862 | 0.794 |
| 79  | 0.960 | 0.817 | 0.841 | 0.871 | 0.807 |
| 80  | 0.971 | 0.822 | 0.835 | 0.874 | 0.812 |
| 81  | 0.968 | 0.811 | 0.829 | 0.868 | 0.802 |
| 82  | 0.971 | 0.798 | 0.832 | 0.865 | 0.799 |
| 83  | 0.968 | 0.817 | 0.835 | 0.872 | 0.808 |
| 84  | 0.974 | 0.814 | 0.829 | 0.871 | 0.807 |
| 85  | 0.968 | 0.822 | 0.814 | 0.867 | 0.801 |
| 86  | 0.968 | 0.814 | 0.835 | 0.871 | 0.807 |
| 87  | 0.971 | 0.806 | 0.832 | 0.868 | 0.803 |
| 88  | 0.965 | 0.814 | 0.820 | 0.865 | 0.798 |
| 89  | 0.962 | 0.814 | 0.838 | 0.870 | 0.805 |
| 90  | 0.962 | 0.817 | 0.829 | 0.868 | 0.802 |
| 91  | 0.971 | 0.817 | 0.832 | 0.872 | 0.808 |
| 92  | 0.965 | 0.809 | 0.826 | 0.865 | 0.798 |
| 93  | 0.965 | 0.814 | 0.838 | 0.871 | 0.807 |
| 94  | 0.965 | 0.809 | 0.829 | 0.866 | 0.800 |
| 95  | 0.971 | 0.798 | 0.835 | 0.866 | 0.800 |
| 96  | 0.974 | 0.809 | 0.823 | 0.867 | 0.801 |
| 97  | 0.971 | 0.814 | 0.823 | 0.868 | 0.802 |
| 98  | 0.965 | 0.811 | 0.841 | 0.871 | 0.807 |
| 99  | 0.977 | 0.806 | 0.826 | 0.868 | 0.802 |
| 100 | 0.983 | 0.798 | 0.823 | 0.866 | 0.800 |
| 101 | 0.983 | 0.796 | 0.826 | 0.866 | 0.800 |
| 102 | 0.980 | 0.827 | 0.829 | 0.877 | 0.816 |
| 103 | 0.983 | 0.822 | 0.826 | 0.875 | 0.813 |
| 104 | 0.968 | 0.827 | 0.832 | 0.874 | 0.812 |
| 105 | 0.986 | 0.814 | 0.823 | 0.873 | 0.809 |
| 106 | 0.980 | 0.819 | 0.826 | 0.873 | 0.811 |
| 107 | 0.968 | 0.817 | 0.841 | 0.873 | 0.811 |
| 108 | 0.977 | 0.814 | 0.832 | 0.873 | 0.809 |
| 109 | 0.968 | 0.819 | 0.847 | 0.876 | 0.815 |
| 110 | 0.974 | 0.822 | 0.826 | 0.873 | 0.809 |

|     |       |       |       |       |       |
|-----|-------|-------|-------|-------|-------|
| 111 | 0.974 | 0.827 | 0.835 | 0.877 | 0.816 |
| 112 | 0.977 | 0.814 | 0.850 | 0.878 | 0.818 |
| 113 | 0.968 | 0.811 | 0.832 | 0.869 | 0.804 |
| 114 | 0.977 | 0.814 | 0.850 | 0.878 | 0.818 |
| 115 | 0.974 | 0.822 | 0.850 | 0.880 | 0.821 |
| 116 | 0.977 | 0.811 | 0.820 | 0.868 | 0.802 |
| 117 | 0.977 | 0.827 | 0.829 | 0.876 | 0.815 |
| 118 | 0.960 | 0.801 | 0.808 | 0.855 | 0.783 |
| 119 | 0.962 | 0.786 | 0.826 | 0.856 | 0.785 |
| 120 | 0.962 | 0.778 | 0.817 | 0.850 | 0.776 |
| 121 | 0.957 | 0.796 | 0.826 | 0.858 | 0.787 |
| 122 | 0.974 | 0.793 | 0.823 | 0.861 | 0.793 |
| 123 | 0.965 | 0.791 | 0.817 | 0.856 | 0.784 |
| 124 | 0.965 | 0.791 | 0.817 | 0.856 | 0.784 |
| 125 | 0.962 | 0.798 | 0.844 | 0.866 | 0.800 |
| 126 | 0.968 | 0.798 | 0.802 | 0.855 | 0.782 |
| 127 | 0.962 | 0.798 | 0.826 | 0.860 | 0.792 |
| 128 | 0.960 | 0.775 | 0.805 | 0.844 | 0.768 |
| 129 | 0.971 | 0.786 | 0.811 | 0.854 | 0.782 |
| 130 | 0.957 | 0.793 | 0.814 | 0.853 | 0.780 |
| 131 | 0.965 | 0.804 | 0.811 | 0.858 | 0.788 |
| 132 | 0.971 | 0.798 | 0.805 | 0.857 | 0.785 |
| 133 | 0.980 | 0.817 | 0.784 | 0.859 | 0.789 |
| 134 | 0.974 | 0.806 | 0.784 | 0.854 | 0.781 |
| 135 | 0.971 | 0.796 | 0.793 | 0.852 | 0.778 |
| 136 | 0.983 | 0.793 | 0.781 | 0.851 | 0.777 |
| 137 | 0.977 | 0.804 | 0.799 | 0.858 | 0.788 |
| 138 | 0.974 | 0.806 | 0.799 | 0.858 | 0.788 |
| 139 | 0.974 | 0.778 | 0.787 | 0.844 | 0.767 |
| 140 | 0.962 | 0.783 | 0.790 | 0.843 | 0.766 |
| 141 | 0.962 | 0.778 | 0.787 | 0.841 | 0.762 |
| 142 | 0.957 | 0.788 | 0.796 | 0.845 | 0.768 |
| 143 | 0.971 | 0.798 | 0.787 | 0.851 | 0.776 |
| 144 | 0.954 | 0.798 | 0.784 | 0.844 | 0.767 |
| 145 | 0.960 | 0.783 | 0.799 | 0.845 | 0.769 |
| 146 | 0.957 | 0.783 | 0.808 | 0.847 | 0.772 |
| 147 | 0.954 | 0.791 | 0.790 | 0.843 | 0.766 |
| 148 | 0.962 | 0.801 | 0.796 | 0.852 | 0.778 |
| 149 | 0.957 | 0.793 | 0.772 | 0.840 | 0.760 |
| 150 | 0.960 | 0.780 | 0.793 | 0.843 | 0.764 |
| 151 | 0.960 | 0.780 | 0.802 | 0.845 | 0.769 |
| 152 | 0.951 | 0.775 | 0.793 | 0.838 | 0.758 |

|     |       |       |       |       |       |
|-----|-------|-------|-------|-------|-------|
| 153 | 0.954 | 0.780 | 0.796 | 0.842 | 0.763 |
| 154 | 0.960 | 0.791 | 0.805 | 0.850 | 0.776 |
| 155 | 0.962 | 0.778 | 0.793 | 0.843 | 0.764 |
| 156 | 0.957 | 0.783 | 0.790 | 0.842 | 0.763 |
| 157 | 0.957 | 0.770 | 0.793 | 0.838 | 0.758 |
| 158 | 0.960 | 0.778 | 0.802 | 0.844 | 0.768 |
| 159 | 0.957 | 0.773 | 0.814 | 0.845 | 0.769 |
| 160 | 0.960 | 0.788 | 0.787 | 0.843 | 0.765 |
| 161 | 0.954 | 0.791 | 0.784 | 0.842 | 0.763 |
| 162 | 0.965 | 0.793 | 0.796 | 0.850 | 0.775 |
| 163 | 0.968 | 0.798 | 0.787 | 0.850 | 0.775 |
| 164 | 0.960 | 0.796 | 0.805 | 0.852 | 0.778 |
| 165 | 0.954 | 0.804 | 0.778 | 0.844 | 0.766 |
| 166 | 0.965 | 0.809 | 0.760 | 0.844 | 0.766 |
| 167 | 0.957 | 0.798 | 0.790 | 0.847 | 0.771 |
| 168 | 0.962 | 0.791 | 0.796 | 0.848 | 0.773 |
| 169 | 0.957 | 0.791 | 0.784 | 0.843 | 0.764 |
| 170 | 0.957 | 0.793 | 0.808 | 0.851 | 0.777 |
| 171 | 0.960 | 0.788 | 0.793 | 0.845 | 0.768 |
| 172 | 0.957 | 0.786 | 0.823 | 0.853 | 0.780 |
| 173 | 0.945 | 0.801 | 0.784 | 0.843 | 0.764 |
| 174 | 0.965 | 0.801 | 0.805 | 0.856 | 0.784 |
| 175 | 0.957 | 0.791 | 0.775 | 0.840 | 0.760 |
| 176 | 0.962 | 0.804 | 0.778 | 0.847 | 0.771 |
| 177 | 0.962 | 0.804 | 0.811 | 0.858 | 0.787 |
| 178 | 0.954 | 0.804 | 0.790 | 0.848 | 0.772 |
| 179 | 0.968 | 0.780 | 0.784 | 0.843 | 0.764 |
| 180 | 0.965 | 0.775 | 0.808 | 0.847 | 0.772 |
| 181 | 0.971 | 0.780 | 0.778 | 0.842 | 0.762 |
| 182 | 0.960 | 0.788 | 0.775 | 0.840 | 0.760 |
| 183 | 0.957 | 0.775 | 0.799 | 0.842 | 0.763 |
| 184 | 0.957 | 0.786 | 0.796 | 0.844 | 0.767 |
| 185 | 0.954 | 0.793 | 0.790 | 0.844 | 0.767 |
| 186 | 0.974 | 0.796 | 0.775 | 0.847 | 0.771 |
| 187 | 0.962 | 0.793 | 0.787 | 0.846 | 0.769 |
| 188 | 0.965 | 0.788 | 0.784 | 0.844 | 0.767 |
| 189 | 0.962 | 0.793 | 0.787 | 0.846 | 0.769 |
| 190 | 0.960 | 0.791 | 0.790 | 0.845 | 0.768 |
| 191 | 0.951 | 0.793 | 0.784 | 0.842 | 0.762 |
| 192 | 0.954 | 0.788 | 0.811 | 0.849 | 0.774 |
| 193 | 0.957 | 0.791 | 0.775 | 0.840 | 0.759 |
| 194 | 0.960 | 0.786 | 0.805 | 0.848 | 0.773 |



|     |       |       |       |       |       |
|-----|-------|-------|-------|-------|-------|
| 195 | 0.962 | 0.778 | 0.793 | 0.843 | 0.764 |
| 196 | 0.968 | 0.788 | 0.805 | 0.852 | 0.778 |
| 197 | 0.962 | 0.786 | 0.808 | 0.850 | 0.776 |
| 198 | 0.968 | 0.783 | 0.790 | 0.845 | 0.768 |
| 199 | 0.974 | 0.783 | 0.793 | 0.848 | 0.773 |
| 200 | 0.968 | 0.775 | 0.790 | 0.843 | 0.764 |
| 201 | 0.965 | 0.780 | 0.799 | 0.846 | 0.770 |
| 202 | 0.980 | 0.780 | 0.775 | 0.843 | 0.765 |
| 203 | 0.968 | 0.786 | 0.781 | 0.843 | 0.765 |
| 204 | 0.974 | 0.767 | 0.784 | 0.840 | 0.760 |
| 205 | 0.968 | 0.765 | 0.799 | 0.842 | 0.763 |
| 206 | 0.971 | 0.786 | 0.769 | 0.841 | 0.761 |
| 207 | 0.965 | 0.788 | 0.781 | 0.843 | 0.765 |
| 208 | 0.965 | 0.778 | 0.799 | 0.845 | 0.769 |
| 209 | 0.968 | 0.778 | 0.823 | 0.854 | 0.782 |
| 210 | 0.971 | 0.773 | 0.805 | 0.847 | 0.772 |
| 211 | 0.971 | 0.780 | 0.784 | 0.843 | 0.765 |
| 212 | 0.968 | 0.780 | 0.802 | 0.848 | 0.773 |
| 213 | 0.971 | 0.783 | 0.778 | 0.843 | 0.764 |
| 214 | 0.965 | 0.780 | 0.796 | 0.845 | 0.768 |
| 215 | 0.971 | 0.773 | 0.820 | 0.852 | 0.779 |
| 216 | 0.971 | 0.770 | 0.787 | 0.841 | 0.761 |
| 217 | 0.965 | 0.770 | 0.790 | 0.840 | 0.760 |
| 218 | 0.977 | 0.780 | 0.793 | 0.848 | 0.773 |
| 219 | 0.965 | 0.783 | 0.802 | 0.848 | 0.773 |
| 220 | 0.971 | 0.788 | 0.802 | 0.852 | 0.778 |
| 221 | 0.968 | 0.786 | 0.784 | 0.844 | 0.767 |
| 222 | 0.968 | 0.778 | 0.802 | 0.847 | 0.772 |
| 223 | 0.968 | 0.773 | 0.814 | 0.849 | 0.775 |
| 224 | 0.983 | 0.783 | 0.763 | 0.842 | 0.762 |
| 225 | 0.974 | 0.783 | 0.802 | 0.851 | 0.777 |
| 226 | 0.971 | 0.770 | 0.802 | 0.845 | 0.769 |
| 227 | 0.980 | 0.778 | 0.811 | 0.854 | 0.781 |
| 228 | 0.977 | 0.765 | 0.802 | 0.845 | 0.769 |
| 229 | 0.971 | 0.767 | 0.790 | 0.841 | 0.761 |
| 230 | 0.968 | 0.770 | 0.805 | 0.845 | 0.769 |
| 231 | 0.968 | 0.780 | 0.790 | 0.844 | 0.767 |
| 232 | 0.980 | 0.783 | 0.772 | 0.843 | 0.765 |
| 233 | 0.965 | 0.770 | 0.808 | 0.845 | 0.769 |
| 234 | 0.962 | 0.780 | 0.802 | 0.846 | 0.770 |
| 235 | 0.974 | 0.786 | 0.793 | 0.849 | 0.774 |
| 236 | 0.971 | 0.778 | 0.796 | 0.846 | 0.770 |

|     |       |       |       |       |       |
|-----|-------|-------|-------|-------|-------|
| 237 | 0.965 | 0.773 | 0.802 | 0.844 | 0.767 |
| 238 | 0.968 | 0.783 | 0.793 | 0.846 | 0.770 |
| 239 | 0.974 | 0.778 | 0.811 | 0.852 | 0.779 |
| 240 | 0.965 | 0.780 | 0.793 | 0.844 | 0.767 |
| 241 | 0.962 | 0.773 | 0.787 | 0.839 | 0.759 |
| 242 | 0.957 | 0.783 | 0.754 | 0.830 | 0.745 |
| 243 | 0.957 | 0.786 | 0.766 | 0.835 | 0.753 |
| 244 | 0.960 | 0.788 | 0.737 | 0.828 | 0.741 |
| 245 | 0.962 | 0.783 | 0.754 | 0.832 | 0.748 |
| 246 | 0.962 | 0.775 | 0.746 | 0.827 | 0.740 |
| 247 | 0.954 | 0.775 | 0.757 | 0.828 | 0.741 |
| 248 | 0.957 | 0.780 | 0.772 | 0.835 | 0.753 |
| 249 | 0.957 | 0.780 | 0.763 | 0.832 | 0.748 |
| 250 | 0.960 | 0.783 | 0.757 | 0.832 | 0.748 |
| 251 | 0.951 | 0.791 | 0.763 | 0.834 | 0.751 |
| 252 | 0.948 | 0.793 | 0.787 | 0.842 | 0.763 |
| 253 | 0.954 | 0.778 | 0.775 | 0.834 | 0.752 |
| 254 | 0.962 | 0.783 | 0.769 | 0.837 | 0.755 |
| 255 | 0.948 | 0.793 | 0.754 | 0.831 | 0.747 |
| 256 | 0.960 | 0.786 | 0.778 | 0.840 | 0.760 |
| 257 | 0.962 | 0.778 | 0.769 | 0.835 | 0.753 |
| 258 | 0.957 | 0.804 | 0.757 | 0.839 | 0.758 |
| 259 | 0.954 | 0.788 | 0.766 | 0.835 | 0.753 |
| 260 | 0.962 | 0.788 | 0.763 | 0.837 | 0.755 |
| 261 | 0.965 | 0.788 | 0.778 | 0.843 | 0.764 |
| 262 | 0.951 | 0.780 | 0.775 | 0.834 | 0.751 |
| 263 | 0.948 | 0.791 | 0.781 | 0.839 | 0.758 |
| 264 | 0.957 | 0.796 | 0.778 | 0.843 | 0.764 |
| 265 | 0.965 | 0.798 | 0.754 | 0.839 | 0.758 |
| 266 | 0.951 | 0.798 | 0.763 | 0.837 | 0.755 |
| 267 | 0.954 | 0.793 | 0.772 | 0.839 | 0.758 |
| 268 | 0.957 | 0.773 | 0.796 | 0.840 | 0.760 |
| 269 | 0.951 | 0.780 | 0.790 | 0.839 | 0.759 |
| 270 | 0.954 | 0.793 | 0.781 | 0.842 | 0.763 |
| 271 | 0.954 | 0.798 | 0.778 | 0.843 | 0.764 |
| 272 | 0.957 | 0.783 | 0.784 | 0.840 | 0.760 |
| 273 | 0.951 | 0.786 | 0.775 | 0.836 | 0.754 |
| 274 | 0.960 | 0.775 | 0.757 | 0.829 | 0.744 |
| 275 | 0.954 | 0.767 | 0.763 | 0.827 | 0.740 |
| 276 | 0.957 | 0.783 | 0.784 | 0.840 | 0.760 |
| 277 | 0.957 | 0.791 | 0.787 | 0.843 | 0.765 |
| 278 | 0.954 | 0.775 | 0.769 | 0.831 | 0.747 |

|     |       |       |       |       |       |
|-----|-------|-------|-------|-------|-------|
| 279 | 0.954 | 0.778 | 0.787 | 0.838 | 0.757 |
| 280 | 0.960 | 0.773 | 0.769 | 0.832 | 0.749 |
| 281 | 0.960 | 0.767 | 0.802 | 0.841 | 0.762 |
| 282 | 0.960 | 0.765 | 0.775 | 0.831 | 0.747 |
| 283 | 0.965 | 0.775 | 0.754 | 0.830 | 0.746 |
| 284 | 0.962 | 0.783 | 0.760 | 0.834 | 0.751 |
| 285 | 0.960 | 0.788 | 0.775 | 0.840 | 0.760 |
| 286 | 0.962 | 0.770 | 0.787 | 0.838 | 0.758 |
| 287 | 0.954 | 0.788 | 0.766 | 0.835 | 0.753 |
| 288 | 0.954 | 0.783 | 0.772 | 0.835 | 0.753 |
| 289 | 0.951 | 0.778 | 0.778 | 0.834 | 0.751 |
| 290 | 0.948 | 0.786 | 0.751 | 0.828 | 0.741 |
| 291 | 0.951 | 0.786 | 0.766 | 0.833 | 0.750 |
| 292 | 0.960 | 0.780 | 0.778 | 0.838 | 0.757 |
| 293 | 0.948 | 0.788 | 0.760 | 0.831 | 0.747 |
| 294 | 0.957 | 0.778 | 0.763 | 0.831 | 0.747 |
| 295 | 0.965 | 0.775 | 0.757 | 0.831 | 0.747 |
| 296 | 0.948 | 0.793 | 0.749 | 0.829 | 0.744 |
| 297 | 0.960 | 0.778 | 0.790 | 0.841 | 0.761 |
| 298 | 0.957 | 0.780 | 0.775 | 0.836 | 0.754 |
| 299 | 0.954 | 0.786 | 0.775 | 0.837 | 0.755 |
| 300 | 0.957 | 0.783 | 0.769 | 0.835 | 0.753 |
| 301 | 0.954 | 0.773 | 0.772 | 0.831 | 0.747 |
| 302 | 0.962 | 0.780 | 0.769 | 0.836 | 0.754 |
| 303 | 0.954 | 0.773 | 0.763 | 0.828 | 0.743 |
| 304 | 0.962 | 0.773 | 0.790 | 0.840 | 0.760 |
| 305 | 0.960 | 0.780 | 0.766 | 0.834 | 0.751 |
| 306 | 0.954 | 0.780 | 0.775 | 0.835 | 0.753 |
| 307 | 0.962 | 0.796 | 0.784 | 0.846 | 0.770 |
| 308 | 0.962 | 0.786 | 0.808 | 0.850 | 0.776 |
| 309 | 0.954 | 0.786 | 0.757 | 0.831 | 0.747 |
| 310 | 0.960 | 0.791 | 0.734 | 0.828 | 0.741 |
| 311 | 0.960 | 0.783 | 0.775 | 0.838 | 0.757 |
| 312 | 0.951 | 0.786 | 0.766 | 0.833 | 0.750 |
| 313 | 0.957 | 0.773 | 0.781 | 0.835 | 0.753 |
| 314 | 0.962 | 0.767 | 0.775 | 0.833 | 0.750 |
| 315 | 0.951 | 0.788 | 0.775 | 0.837 | 0.755 |
| 316 | 0.957 | 0.780 | 0.757 | 0.830 | 0.746 |
| 317 | 0.960 | 0.786 | 0.775 | 0.839 | 0.758 |
| 318 | 0.954 | 0.796 | 0.769 | 0.839 | 0.758 |
| 319 | 0.954 | 0.780 | 0.769 | 0.833 | 0.750 |
| 320 | 0.960 | 0.788 | 0.781 | 0.842 | 0.763 |

|     |       |       |       |       |       |
|-----|-------|-------|-------|-------|-------|
| 321 | 0.957 | 0.780 | 0.772 | 0.835 | 0.753 |
| 322 | 0.968 | 0.762 | 0.799 | 0.841 | 0.762 |
| 323 | 0.960 | 0.788 | 0.772 | 0.839 | 0.758 |
| 324 | 0.965 | 0.780 | 0.787 | 0.843 | 0.764 |
| 325 | 0.957 | 0.780 | 0.787 | 0.840 | 0.760 |
| 326 | 0.957 | 0.770 | 0.772 | 0.831 | 0.747 |
| 327 | 0.954 | 0.755 | 0.790 | 0.830 | 0.747 |
| 328 | 0.960 | 0.767 | 0.781 | 0.834 | 0.752 |
| 329 | 0.957 | 0.786 | 0.793 | 0.843 | 0.766 |
| 330 | 0.954 | 0.783 | 0.775 | 0.836 | 0.754 |
| 331 | 0.971 | 0.775 | 0.760 | 0.834 | 0.751 |
| 332 | 0.962 | 0.786 | 0.763 | 0.836 | 0.754 |
| 333 | 0.960 | 0.791 | 0.772 | 0.840 | 0.760 |
| 334 | 0.965 | 0.780 | 0.766 | 0.836 | 0.754 |
| 335 | 0.957 | 0.786 | 0.793 | 0.843 | 0.766 |
| 336 | 0.957 | 0.775 | 0.757 | 0.828 | 0.743 |
| 337 | 0.965 | 0.780 | 0.751 | 0.831 | 0.747 |
| 338 | 0.954 | 0.752 | 0.781 | 0.827 | 0.741 |
| 339 | 0.954 | 0.780 | 0.769 | 0.833 | 0.750 |
| 340 | 0.957 | 0.775 | 0.769 | 0.832 | 0.749 |
| 341 | 0.960 | 0.765 | 0.772 | 0.830 | 0.746 |
| 342 | 0.957 | 0.767 | 0.769 | 0.829 | 0.745 |
| 343 | 0.960 | 0.783 | 0.757 | 0.832 | 0.748 |
| 344 | 0.948 | 0.786 | 0.743 | 0.825 | 0.737 |
| 345 | 0.951 | 0.773 | 0.766 | 0.828 | 0.743 |
| 346 | 0.960 | 0.788 | 0.790 | 0.844 | 0.767 |
| 347 | 0.954 | 0.788 | 0.740 | 0.827 | 0.739 |
| 348 | 0.951 | 0.788 | 0.781 | 0.839 | 0.758 |
| 349 | 0.957 | 0.798 | 0.781 | 0.844 | 0.766 |
| 350 | 0.957 | 0.791 | 0.793 | 0.845 | 0.768 |
| 351 | 0.951 | 0.783 | 0.784 | 0.838 | 0.757 |
| 352 | 0.957 | 0.786 | 0.766 | 0.835 | 0.752 |
| 353 | 0.954 | 0.778 | 0.772 | 0.833 | 0.750 |
| 354 | 0.954 | 0.786 | 0.769 | 0.835 | 0.752 |
| 355 | 0.960 | 0.804 | 0.775 | 0.845 | 0.768 |
| 356 | 0.968 | 0.770 | 0.784 | 0.839 | 0.759 |
| 357 | 0.957 | 0.788 | 0.790 | 0.843 | 0.765 |
| 358 | 0.960 | 0.783 | 0.793 | 0.843 | 0.766 |
| 359 | 0.960 | 0.788 | 0.763 | 0.836 | 0.754 |
| 360 | 0.954 | 0.783 | 0.778 | 0.837 | 0.755 |
| 361 | 0.962 | 0.788 | 0.769 | 0.839 | 0.758 |
| 362 | 0.954 | 0.783 | 0.790 | 0.841 | 0.761 |

|     |       |       |       |       |       |
|-----|-------|-------|-------|-------|-------|
| 363 | 0.948 | 0.778 | 0.778 | 0.833 | 0.750 |
| 364 | 0.936 | 0.786 | 0.781 | 0.833 | 0.750 |
| 365 | 0.931 | 0.806 | 0.772 | 0.836 | 0.754 |
| 366 | 0.942 | 0.793 | 0.778 | 0.837 | 0.755 |
| 367 | 0.942 | 0.788 | 0.778 | 0.835 | 0.753 |
| 368 | 0.939 | 0.791 | 0.769 | 0.832 | 0.748 |
| 369 | 0.948 | 0.786 | 0.778 | 0.836 | 0.754 |
| 370 | 0.942 | 0.801 | 0.769 | 0.837 | 0.755 |
| 371 | 0.939 | 0.798 | 0.781 | 0.839 | 0.758 |
| 372 | 0.951 | 0.798 | 0.766 | 0.838 | 0.756 |
| 373 | 0.948 | 0.770 | 0.781 | 0.831 | 0.747 |
| 374 | 0.948 | 0.796 | 0.769 | 0.837 | 0.755 |
| 375 | 0.954 | 0.793 | 0.781 | 0.842 | 0.762 |
| 376 | 0.942 | 0.793 | 0.760 | 0.831 | 0.747 |
| 377 | 0.945 | 0.793 | 0.781 | 0.839 | 0.758 |
| 378 | 0.951 | 0.791 | 0.778 | 0.839 | 0.758 |
| 379 | 0.942 | 0.783 | 0.796 | 0.839 | 0.759 |
| 380 | 0.948 | 0.798 | 0.781 | 0.842 | 0.762 |
| 381 | 0.962 | 0.773 | 0.775 | 0.835 | 0.753 |
| 382 | 0.954 | 0.765 | 0.772 | 0.828 | 0.743 |
| 383 | 0.960 | 0.783 | 0.754 | 0.831 | 0.747 |
| 384 | 0.951 | 0.775 | 0.743 | 0.822 | 0.733 |
| 385 | 0.948 | 0.778 | 0.757 | 0.827 | 0.740 |
| 386 | 0.948 | 0.770 | 0.769 | 0.828 | 0.742 |
| 387 | 0.948 | 0.783 | 0.749 | 0.826 | 0.738 |
| 388 | 0.951 | 0.767 | 0.778 | 0.830 | 0.746 |
| 389 | 0.945 | 0.780 | 0.778 | 0.833 | 0.750 |
| 390 | 0.951 | 0.762 | 0.766 | 0.825 | 0.738 |
| 391 | 0.960 | 0.755 | 0.787 | 0.831 | 0.748 |
| 392 | 0.951 | 0.778 | 0.793 | 0.839 | 0.759 |
| 393 | 0.945 | 0.778 | 0.790 | 0.836 | 0.754 |
| 394 | 0.945 | 0.755 | 0.787 | 0.827 | 0.741 |
| 395 | 0.948 | 0.770 | 0.784 | 0.832 | 0.749 |
| 396 | 0.945 | 0.775 | 0.784 | 0.833 | 0.750 |
| 397 | 0.960 | 0.788 | 0.754 | 0.833 | 0.749 |
| 398 | 0.951 | 0.770 | 0.799 | 0.838 | 0.758 |
| 399 | 0.954 | 0.780 | 0.784 | 0.838 | 0.757 |
| 400 | 0.951 | 0.770 | 0.772 | 0.829 | 0.744 |
| 401 | 0.954 | 0.783 | 0.790 | 0.841 | 0.761 |
| 402 | 0.951 | 0.788 | 0.775 | 0.837 | 0.755 |
| 403 | 0.948 | 0.767 | 0.775 | 0.828 | 0.743 |
| 404 | 0.951 | 0.786 | 0.769 | 0.834 | 0.751 |

|     |       |       |       |       |       |
|-----|-------|-------|-------|-------|-------|
| 405 | 0.954 | 0.786 | 0.793 | 0.843 | 0.764 |
| 406 | 0.957 | 0.778 | 0.775 | 0.835 | 0.753 |
| 407 | 0.971 | 0.767 | 0.775 | 0.836 | 0.754 |
| 408 | 0.945 | 0.775 | 0.787 | 0.834 | 0.752 |
| 409 | 0.957 | 0.778 | 0.775 | 0.835 | 0.753 |
| 410 | 0.960 | 0.780 | 0.799 | 0.844 | 0.767 |
| 411 | 0.957 | 0.770 | 0.775 | 0.832 | 0.749 |
| 412 | 0.948 | 0.770 | 0.796 | 0.836 | 0.755 |
| 413 | 0.948 | 0.783 | 0.784 | 0.837 | 0.756 |
| 414 | 0.948 | 0.783 | 0.778 | 0.835 | 0.753 |
| 415 | 0.945 | 0.780 | 0.778 | 0.833 | 0.750 |
| 416 | 0.957 | 0.775 | 0.784 | 0.837 | 0.756 |
| 417 | 0.951 | 0.773 | 0.799 | 0.839 | 0.759 |
| 418 | 0.962 | 0.778 | 0.778 | 0.838 | 0.757 |
| 419 | 0.951 | 0.780 | 0.790 | 0.839 | 0.759 |
| 420 | 0.954 | 0.783 | 0.781 | 0.838 | 0.757 |
| 421 | 0.951 | 0.778 | 0.799 | 0.841 | 0.762 |
| 422 | 0.951 | 0.773 | 0.784 | 0.834 | 0.752 |
| 423 | 0.948 | 0.773 | 0.784 | 0.833 | 0.750 |
| 424 | 0.948 | 0.786 | 0.769 | 0.833 | 0.750 |
| 425 | 0.925 | 0.780 | 0.749 | 0.817 | 0.726 |
| 426 | 0.931 | 0.783 | 0.763 | 0.825 | 0.737 |
| 427 | 0.942 | 0.773 | 0.772 | 0.828 | 0.742 |
| 428 | 0.957 | 0.770 | 0.781 | 0.834 | 0.752 |
| 429 | 0.928 | 0.773 | 0.784 | 0.827 | 0.741 |
| 430 | 0.951 | 0.775 | 0.778 | 0.833 | 0.750 |
| 431 | 0.954 | 0.765 | 0.781 | 0.831 | 0.748 |
| 432 | 0.948 | 0.788 | 0.781 | 0.838 | 0.757 |
| 433 | 0.951 | 0.767 | 0.778 | 0.830 | 0.746 |
| 434 | 0.960 | 0.765 | 0.760 | 0.827 | 0.740 |
| 435 | 0.945 | 0.775 | 0.784 | 0.833 | 0.750 |
| 436 | 0.954 | 0.780 | 0.769 | 0.833 | 0.750 |
| 437 | 0.951 | 0.780 | 0.766 | 0.831 | 0.747 |
| 438 | 0.948 | 0.788 | 0.778 | 0.837 | 0.755 |
| 439 | 0.957 | 0.775 | 0.772 | 0.833 | 0.750 |
| 440 | 0.954 | 0.770 | 0.746 | 0.822 | 0.733 |
| 441 | 0.942 | 0.783 | 0.778 | 0.833 | 0.750 |
| 442 | 0.942 | 0.762 | 0.796 | 0.831 | 0.748 |
| 443 | 0.948 | 0.791 | 0.778 | 0.838 | 0.757 |
| 444 | 0.948 | 0.778 | 0.766 | 0.829 | 0.744 |
| 445 | 0.954 | 0.786 | 0.766 | 0.834 | 0.751 |
| 446 | 0.948 | 0.786 | 0.766 | 0.832 | 0.748 |

|     |       |       |       |       |       |
|-----|-------|-------|-------|-------|-------|
| 447 | 0.960 | 0.786 | 0.760 | 0.834 | 0.751 |
| 448 | 0.962 | 0.778 | 0.763 | 0.833 | 0.750 |
| 449 | 0.957 | 0.788 | 0.769 | 0.837 | 0.755 |
| 450 | 0.957 | 0.783 | 0.775 | 0.837 | 0.756 |
| 451 | 0.951 | 0.786 | 0.772 | 0.835 | 0.753 |
| 452 | 0.960 | 0.786 | 0.778 | 0.840 | 0.760 |
| 453 | 0.954 | 0.786 | 0.778 | 0.838 | 0.757 |
| 454 | 0.965 | 0.783 | 0.787 | 0.843 | 0.765 |
| 455 | 0.965 | 0.786 | 0.763 | 0.837 | 0.755 |
| 456 | 0.951 | 0.793 | 0.787 | 0.843 | 0.764 |
| 457 | 0.960 | 0.786 | 0.763 | 0.835 | 0.752 |
| 458 | 0.942 | 0.760 | 0.787 | 0.828 | 0.742 |
| 459 | 0.951 | 0.796 | 0.766 | 0.837 | 0.755 |
| 460 | 0.942 | 0.791 | 0.772 | 0.834 | 0.751 |
| 461 | 0.960 | 0.783 | 0.787 | 0.842 | 0.763 |
| 462 | 0.957 | 0.783 | 0.787 | 0.841 | 0.761 |
| 463 | 0.957 | 0.757 | 0.772 | 0.827 | 0.740 |
| 464 | 0.948 | 0.786 | 0.763 | 0.831 | 0.747 |
| 465 | 0.962 | 0.786 | 0.778 | 0.841 | 0.761 |
| 466 | 0.954 | 0.791 | 0.769 | 0.837 | 0.755 |
| 467 | 0.942 | 0.762 | 0.781 | 0.827 | 0.741 |
| 468 | 0.951 | 0.791 | 0.769 | 0.836 | 0.754 |
| 469 | 0.954 | 0.780 | 0.778 | 0.836 | 0.754 |
| 470 | 0.962 | 0.783 | 0.772 | 0.838 | 0.757 |
| 471 | 0.945 | 0.788 | 0.775 | 0.835 | 0.753 |
| 472 | 0.948 | 0.786 | 0.766 | 0.832 | 0.748 |
| 473 | 0.942 | 0.783 | 0.763 | 0.828 | 0.743 |
| 474 | 0.957 | 0.786 | 0.784 | 0.841 | 0.761 |
| 475 | 0.960 | 0.770 | 0.775 | 0.833 | 0.750 |
| 476 | 0.960 | 0.775 | 0.775 | 0.835 | 0.753 |
| 477 | 0.965 | 0.778 | 0.757 | 0.832 | 0.748 |
| 478 | 0.951 | 0.775 | 0.769 | 0.830 | 0.746 |
| 479 | 0.951 | 0.793 | 0.751 | 0.831 | 0.747 |
| 480 | 0.962 | 0.783 | 0.754 | 0.832 | 0.748 |
| 481 | 0.951 | 0.765 | 0.772 | 0.828 | 0.742 |
| 482 | 0.948 | 0.773 | 0.772 | 0.829 | 0.744 |
| 483 | 0.951 | 0.788 | 0.760 | 0.832 | 0.748 |
| 484 | 0.939 | 0.786 | 0.769 | 0.830 | 0.746 |
| 485 | 0.962 | 0.762 | 0.763 | 0.828 | 0.742 |
| 486 | 0.957 | 0.783 | 0.787 | 0.841 | 0.761 |
| 487 | 0.948 | 0.780 | 0.772 | 0.832 | 0.748 |
| 488 | 0.939 | 0.773 | 0.769 | 0.826 | 0.739 |

|     |       |       |       |       |       |
|-----|-------|-------|-------|-------|-------|
| 489 | 0.945 | 0.760 | 0.778 | 0.826 | 0.739 |
| 490 | 0.951 | 0.778 | 0.763 | 0.829 | 0.744 |
| 491 | 0.968 | 0.780 | 0.778 | 0.841 | 0.761 |
| 492 | 0.962 | 0.798 | 0.778 | 0.845 | 0.768 |
| 493 | 0.962 | 0.793 | 0.766 | 0.840 | 0.759 |
| 494 | 0.954 | 0.786 | 0.760 | 0.832 | 0.748 |
| 495 | 0.957 | 0.778 | 0.796 | 0.842 | 0.763 |
| 496 | 0.960 | 0.786 | 0.793 | 0.844 | 0.767 |
| 497 | 0.954 | 0.788 | 0.787 | 0.842 | 0.763 |
| 498 | 0.954 | 0.788 | 0.784 | 0.841 | 0.761 |
| 499 | 0.965 | 0.788 | 0.793 | 0.847 | 0.771 |
| 500 | 0.960 | 0.780 | 0.787 | 0.841 | 0.762 |
| 501 | 0.957 | 0.778 | 0.808 | 0.845 | 0.769 |
| 502 | 0.962 | 0.778 | 0.805 | 0.846 | 0.770 |
| 503 | 0.957 | 0.775 | 0.799 | 0.842 | 0.763 |
| 504 | 0.957 | 0.793 | 0.781 | 0.843 | 0.764 |
| 505 | 0.948 | 0.778 | 0.784 | 0.835 | 0.753 |
| 506 | 0.951 | 0.788 | 0.793 | 0.843 | 0.764 |
| 507 | 0.960 | 0.796 | 0.775 | 0.843 | 0.764 |
| 508 | 0.954 | 0.788 | 0.778 | 0.839 | 0.758 |
| 509 | 0.974 | 0.773 | 0.778 | 0.840 | 0.760 |
| 510 | 0.968 | 0.786 | 0.781 | 0.843 | 0.765 |
| 511 | 0.968 | 0.796 | 0.781 | 0.847 | 0.771 |
| 512 | 0.965 | 0.798 | 0.772 | 0.844 | 0.767 |
| 513 | 0.957 | 0.770 | 0.775 | 0.832 | 0.749 |
| 514 | 0.957 | 0.793 | 0.784 | 0.843 | 0.765 |
| 515 | 0.948 | 0.791 | 0.781 | 0.839 | 0.758 |
| 516 | 0.962 | 0.780 | 0.787 | 0.842 | 0.763 |
| 517 | 0.948 | 0.788 | 0.790 | 0.841 | 0.761 |
| 518 | 0.945 | 0.788 | 0.769 | 0.833 | 0.750 |
| 519 | 0.945 | 0.796 | 0.778 | 0.839 | 0.758 |
| 520 | 0.951 | 0.770 | 0.772 | 0.829 | 0.745 |
| 521 | 0.962 | 0.783 | 0.793 | 0.844 | 0.767 |
| 522 | 0.962 | 0.791 | 0.778 | 0.843 | 0.764 |
| 523 | 0.954 | 0.775 | 0.796 | 0.840 | 0.760 |
| 524 | 0.960 | 0.770 | 0.787 | 0.837 | 0.756 |
| 525 | 0.960 | 0.791 | 0.784 | 0.843 | 0.765 |
| 526 | 0.954 | 0.765 | 0.799 | 0.837 | 0.756 |
| 527 | 0.954 | 0.770 | 0.775 | 0.831 | 0.747 |
| 528 | 0.948 | 0.767 | 0.778 | 0.829 | 0.745 |
| 529 | 0.954 | 0.804 | 0.799 | 0.851 | 0.777 |
| 530 | 0.957 | 0.786 | 0.790 | 0.843 | 0.764 |



|     |       |       |       |       |       |
|-----|-------|-------|-------|-------|-------|
| 531 | 0.960 | 0.757 | 0.796 | 0.835 | 0.754 |
| 532 | 0.960 | 0.796 | 0.784 | 0.845 | 0.768 |
| 533 | 0.948 | 0.783 | 0.802 | 0.843 | 0.765 |
| 534 | 0.962 | 0.788 | 0.790 | 0.845 | 0.768 |
| 535 | 0.957 | 0.788 | 0.814 | 0.851 | 0.777 |
| 536 | 0.965 | 0.770 | 0.793 | 0.841 | 0.762 |
| 537 | 0.960 | 0.801 | 0.781 | 0.846 | 0.769 |
| 538 | 0.942 | 0.788 | 0.811 | 0.845 | 0.769 |
| 539 | 0.954 | 0.786 | 0.787 | 0.841 | 0.761 |
| 540 | 0.957 | 0.778 | 0.796 | 0.842 | 0.763 |
| 541 | 0.954 | 0.783 | 0.796 | 0.843 | 0.764 |
| 542 | 0.960 | 0.798 | 0.808 | 0.854 | 0.781 |
| 543 | 0.960 | 0.775 | 0.808 | 0.845 | 0.769 |
| 544 | 0.962 | 0.780 | 0.793 | 0.843 | 0.766 |
| 545 | 0.948 | 0.765 | 0.817 | 0.841 | 0.763 |
| 546 | 0.957 | 0.786 | 0.796 | 0.844 | 0.767 |
| 547 | 0.951 | 0.765 | 0.790 | 0.833 | 0.751 |
| 548 | 0.954 | 0.778 | 0.799 | 0.842 | 0.763 |
| 549 | 0.960 | 0.770 | 0.787 | 0.837 | 0.756 |
| 550 | 0.954 | 0.767 | 0.796 | 0.837 | 0.756 |
| 551 | 0.957 | 0.773 | 0.799 | 0.841 | 0.762 |
| 552 | 0.954 | 0.783 | 0.775 | 0.836 | 0.754 |
| 553 | 0.951 | 0.775 | 0.790 | 0.837 | 0.756 |
| 554 | 0.945 | 0.767 | 0.796 | 0.834 | 0.752 |
| 555 | 0.957 | 0.775 | 0.811 | 0.845 | 0.769 |
| 556 | 0.960 | 0.778 | 0.790 | 0.841 | 0.762 |
| 557 | 0.960 | 0.788 | 0.769 | 0.838 | 0.757 |
| 558 | 0.965 | 0.778 | 0.784 | 0.841 | 0.761 |
| 559 | 0.957 | 0.783 | 0.784 | 0.840 | 0.760 |
| 560 | 0.942 | 0.778 | 0.796 | 0.837 | 0.756 |
| 561 | 0.965 | 0.773 | 0.793 | 0.842 | 0.763 |
| 562 | 0.951 | 0.765 | 0.775 | 0.828 | 0.743 |
| 563 | 0.948 | 0.747 | 0.778 | 0.822 | 0.734 |
| 564 | 0.945 | 0.767 | 0.802 | 0.836 | 0.755 |
| 565 | 0.945 | 0.767 | 0.784 | 0.830 | 0.746 |
| 566 | 0.945 | 0.765 | 0.763 | 0.823 | 0.735 |
| 567 | 0.948 | 0.778 | 0.775 | 0.832 | 0.749 |
| 568 | 0.945 | 0.744 | 0.787 | 0.823 | 0.736 |
| 569 | 0.945 | 0.744 | 0.784 | 0.822 | 0.734 |
| 570 | 0.936 | 0.757 | 0.772 | 0.820 | 0.731 |
| 571 | 0.948 | 0.765 | 0.769 | 0.826 | 0.739 |
| 572 | 0.951 | 0.767 | 0.787 | 0.833 | 0.750 |

|     |       |       |       |       |       |
|-----|-------|-------|-------|-------|-------|
| 573 | 0.957 | 0.752 | 0.769 | 0.824 | 0.736 |
| 574 | 0.936 | 0.775 | 0.760 | 0.823 | 0.735 |
| 575 | 0.945 | 0.770 | 0.763 | 0.825 | 0.737 |
| 576 | 0.962 | 0.755 | 0.793 | 0.834 | 0.752 |
| 577 | 0.942 | 0.760 | 0.790 | 0.828 | 0.744 |
| 578 | 0.951 | 0.749 | 0.778 | 0.824 | 0.737 |
| 579 | 0.942 | 0.757 | 0.781 | 0.825 | 0.738 |
| 580 | 0.939 | 0.762 | 0.775 | 0.824 | 0.736 |
| 581 | 0.910 | 0.762 | 0.766 | 0.812 | 0.718 |
| 582 | 0.962 | 0.767 | 0.769 | 0.831 | 0.747 |
| 583 | 0.942 | 0.767 | 0.778 | 0.828 | 0.742 |
| 584 | 0.960 | 0.765 | 0.754 | 0.825 | 0.737 |
| 585 | 0.942 | 0.765 | 0.784 | 0.828 | 0.744 |
| 586 | 0.948 | 0.731 | 0.781 | 0.817 | 0.728 |
| 587 | 0.954 | 0.765 | 0.778 | 0.830 | 0.746 |
| 588 | 0.936 | 0.762 | 0.749 | 0.814 | 0.722 |
| 589 | 0.954 | 0.773 | 0.769 | 0.830 | 0.746 |
| 590 | 0.954 | 0.749 | 0.811 | 0.835 | 0.755 |
| 591 | 0.945 | 0.749 | 0.769 | 0.819 | 0.729 |
| 592 | 0.954 | 0.747 | 0.784 | 0.826 | 0.740 |
| 593 | 0.954 | 0.762 | 0.778 | 0.829 | 0.745 |
| 594 | 0.954 | 0.757 | 0.757 | 0.821 | 0.732 |
| 595 | 0.942 | 0.755 | 0.772 | 0.821 | 0.732 |
| 596 | 0.945 | 0.767 | 0.772 | 0.827 | 0.740 |
| 597 | 0.948 | 0.760 | 0.769 | 0.824 | 0.736 |
| 598 | 0.945 | 0.757 | 0.772 | 0.823 | 0.735 |
| 599 | 0.945 | 0.760 | 0.790 | 0.829 | 0.745 |
| 600 | 0.951 | 0.760 | 0.772 | 0.826 | 0.739 |
| 601 | 0.948 | 0.765 | 0.778 | 0.828 | 0.743 |
| 602 | 0.951 | 0.770 | 0.781 | 0.832 | 0.749 |
| 603 | 0.951 | 0.752 | 0.784 | 0.827 | 0.741 |
| 604 | 0.948 | 0.749 | 0.760 | 0.817 | 0.727 |
| 605 | 0.948 | 0.752 | 0.793 | 0.828 | 0.744 |
| 606 | 0.960 | 0.752 | 0.784 | 0.829 | 0.745 |
| 607 | 0.960 | 0.765 | 0.766 | 0.828 | 0.743 |
| 608 | 0.939 | 0.765 | 0.772 | 0.824 | 0.736 |
| 609 | 0.960 | 0.765 | 0.784 | 0.834 | 0.752 |
| 610 | 0.942 | 0.721 | 0.772 | 0.809 | 0.715 |
| 611 | 0.951 | 0.778 | 0.749 | 0.825 | 0.737 |
| 612 | 0.945 | 0.752 | 0.793 | 0.828 | 0.743 |
| 613 | 0.945 | 0.770 | 0.772 | 0.828 | 0.742 |
| 614 | 0.957 | 0.778 | 0.751 | 0.828 | 0.741 |

|     |       |       |       |       |       |
|-----|-------|-------|-------|-------|-------|
| 615 | 0.962 | 0.757 | 0.772 | 0.828 | 0.743 |
| 616 | 0.942 | 0.767 | 0.787 | 0.830 | 0.746 |
| 617 | 0.945 | 0.767 | 0.790 | 0.832 | 0.749 |
| 618 | 0.945 | 0.778 | 0.784 | 0.834 | 0.752 |
| 619 | 0.948 | 0.749 | 0.766 | 0.819 | 0.729 |
| 620 | 0.945 | 0.775 | 0.766 | 0.828 | 0.742 |
| 621 | 0.936 | 0.767 | 0.790 | 0.829 | 0.745 |
| 622 | 0.951 | 0.773 | 0.778 | 0.832 | 0.749 |
| 623 | 0.934 | 0.744 | 0.784 | 0.818 | 0.729 |
| 624 | 0.945 | 0.783 | 0.772 | 0.832 | 0.749 |
| 625 | 0.957 | 0.775 | 0.778 | 0.835 | 0.753 |
| 626 | 0.942 | 0.755 | 0.763 | 0.818 | 0.728 |
| 627 | 0.936 | 0.770 | 0.805 | 0.835 | 0.754 |
| 628 | 0.951 | 0.765 | 0.784 | 0.831 | 0.748 |
| 629 | 0.948 | 0.747 | 0.781 | 0.823 | 0.736 |
| 630 | 0.951 | 0.760 | 0.790 | 0.831 | 0.748 |
| 631 | 0.942 | 0.775 | 0.766 | 0.827 | 0.740 |
| 632 | 0.962 | 0.747 | 0.778 | 0.827 | 0.741 |
| 633 | 0.942 | 0.762 | 0.778 | 0.826 | 0.739 |
| 634 | 0.948 | 0.742 | 0.805 | 0.828 | 0.745 |
| 635 | 0.945 | 0.739 | 0.778 | 0.818 | 0.729 |
| 636 | 0.939 | 0.762 | 0.799 | 0.831 | 0.748 |
| 637 | 0.945 | 0.767 | 0.778 | 0.828 | 0.743 |
| 638 | 0.948 | 0.744 | 0.793 | 0.826 | 0.740 |
| 639 | 0.945 | 0.762 | 0.787 | 0.829 | 0.745 |
| 640 | 0.942 | 0.767 | 0.784 | 0.829 | 0.745 |
| 641 | 0.928 | 0.752 | 0.787 | 0.820 | 0.732 |
| 642 | 0.951 | 0.788 | 0.778 | 0.838 | 0.757 |
| 643 | 0.948 | 0.765 | 0.781 | 0.829 | 0.745 |
| 644 | 0.945 | 0.757 | 0.766 | 0.821 | 0.732 |
| 645 | 0.934 | 0.765 | 0.793 | 0.828 | 0.744 |
| 646 | 0.936 | 0.747 | 0.787 | 0.821 | 0.733 |
| 647 | 0.922 | 0.731 | 0.769 | 0.805 | 0.710 |
| 648 | 0.928 | 0.760 | 0.757 | 0.813 | 0.721 |
| 649 | 0.925 | 0.755 | 0.769 | 0.814 | 0.723 |
| 650 | 0.936 | 0.765 | 0.751 | 0.816 | 0.725 |
| 651 | 0.925 | 0.742 | 0.763 | 0.808 | 0.713 |
| 652 | 0.939 | 0.767 | 0.787 | 0.829 | 0.745 |
| 653 | 0.951 | 0.778 | 0.751 | 0.826 | 0.738 |
| 654 | 0.934 | 0.736 | 0.778 | 0.813 | 0.722 |
| 655 | 0.931 | 0.770 | 0.766 | 0.821 | 0.732 |
| 656 | 0.939 | 0.770 | 0.754 | 0.820 | 0.730 |

|     |       |       |       |       |       |
|-----|-------|-------|-------|-------|-------|
| 657 | 0.945 | 0.767 | 0.784 | 0.830 | 0.746 |
| 658 | 0.939 | 0.765 | 0.769 | 0.823 | 0.735 |
| 659 | 0.910 | 0.770 | 0.775 | 0.817 | 0.727 |
| 660 | 0.934 | 0.762 | 0.757 | 0.816 | 0.725 |
| 661 | 0.945 | 0.770 | 0.769 | 0.827 | 0.740 |
| 662 | 0.948 | 0.752 | 0.787 | 0.827 | 0.741 |
| 663 | 0.936 | 0.765 | 0.766 | 0.821 | 0.732 |
| 664 | 0.925 | 0.742 | 0.781 | 0.813 | 0.722 |
| 665 | 0.934 | 0.760 | 0.775 | 0.821 | 0.732 |
| 666 | 0.939 | 0.736 | 0.793 | 0.820 | 0.732 |
| 667 | 0.951 | 0.757 | 0.796 | 0.832 | 0.750 |
| 668 | 0.916 | 0.752 | 0.790 | 0.817 | 0.728 |
| 669 | 0.928 | 0.744 | 0.799 | 0.821 | 0.734 |
| 670 | 0.934 | 0.762 | 0.787 | 0.826 | 0.740 |
| 671 | 0.936 | 0.755 | 0.787 | 0.824 | 0.737 |
| 672 | 0.942 | 0.742 | 0.760 | 0.813 | 0.720 |
| 673 | 0.939 | 0.770 | 0.754 | 0.820 | 0.730 |
| 674 | 0.942 | 0.757 | 0.746 | 0.813 | 0.720 |
| 675 | 0.922 | 0.739 | 0.760 | 0.805 | 0.709 |
| 676 | 0.945 | 0.757 | 0.734 | 0.811 | 0.716 |
| 677 | 0.939 | 0.731 | 0.763 | 0.809 | 0.715 |
| 678 | 0.928 | 0.744 | 0.766 | 0.811 | 0.717 |
| 679 | 0.934 | 0.767 | 0.766 | 0.821 | 0.732 |
| 680 | 0.928 | 0.749 | 0.763 | 0.812 | 0.718 |
| 681 | 0.931 | 0.744 | 0.734 | 0.801 | 0.702 |
| 682 | 0.931 | 0.762 | 0.751 | 0.813 | 0.720 |
| 683 | 0.934 | 0.742 | 0.760 | 0.810 | 0.716 |
| 684 | 0.936 | 0.747 | 0.737 | 0.805 | 0.708 |
| 685 | 0.936 | 0.742 | 0.754 | 0.809 | 0.714 |
| 686 | 0.919 | 0.760 | 0.760 | 0.812 | 0.718 |
| 687 | 0.942 | 0.760 | 0.763 | 0.820 | 0.731 |
| 688 | 0.934 | 0.755 | 0.766 | 0.816 | 0.725 |
| 689 | 0.936 | 0.742 | 0.746 | 0.806 | 0.710 |
| 690 | 0.931 | 0.718 | 0.754 | 0.799 | 0.699 |
| 691 | 0.951 | 0.724 | 0.766 | 0.811 | 0.718 |
| 692 | 0.939 | 0.757 | 0.749 | 0.813 | 0.721 |
| 693 | 0.934 | 0.742 | 0.772 | 0.813 | 0.722 |
| 694 | 0.939 | 0.760 | 0.749 | 0.814 | 0.722 |
| 695 | 0.948 | 0.736 | 0.775 | 0.817 | 0.727 |
| 696 | 0.948 | 0.742 | 0.757 | 0.813 | 0.721 |
| 697 | 0.948 | 0.749 | 0.787 | 0.826 | 0.740 |
| 698 | 0.948 | 0.760 | 0.763 | 0.822 | 0.733 |

|     |       |       |       |       |       |
|-----|-------|-------|-------|-------|-------|
| 699 | 0.934 | 0.731 | 0.781 | 0.813 | 0.721 |
| 700 | 0.925 | 0.734 | 0.772 | 0.808 | 0.714 |
| 701 | 0.942 | 0.765 | 0.754 | 0.819 | 0.729 |
| 702 | 0.939 | 0.742 | 0.793 | 0.822 | 0.735 |
| 703 | 0.931 | 0.749 | 0.772 | 0.815 | 0.724 |
| 704 | 0.942 | 0.760 | 0.769 | 0.822 | 0.734 |
| 705 | 0.931 | 0.760 | 0.766 | 0.817 | 0.727 |
| 706 | 0.942 | 0.755 | 0.757 | 0.816 | 0.725 |
| 707 | 0.945 | 0.755 | 0.757 | 0.817 | 0.726 |
| 708 | 0.925 | 0.780 | 0.746 | 0.816 | 0.724 |
| 709 | 0.948 | 0.770 | 0.760 | 0.825 | 0.737 |
| 710 | 0.905 | 0.752 | 0.763 | 0.805 | 0.709 |
| 711 | 0.919 | 0.742 | 0.749 | 0.801 | 0.703 |
| 712 | 0.928 | 0.734 | 0.772 | 0.809 | 0.714 |
| 713 | 0.908 | 0.726 | 0.757 | 0.795 | 0.694 |
| 714 | 0.908 | 0.739 | 0.772 | 0.804 | 0.708 |
| 715 | 0.905 | 0.742 | 0.769 | 0.803 | 0.706 |
| 716 | 0.910 | 0.755 | 0.757 | 0.806 | 0.710 |
| 717 | 0.916 | 0.762 | 0.751 | 0.809 | 0.713 |
| 718 | 0.922 | 0.734 | 0.784 | 0.811 | 0.718 |
| 719 | 0.908 | 0.739 | 0.769 | 0.803 | 0.706 |
| 720 | 0.908 | 0.744 | 0.772 | 0.806 | 0.711 |
| 721 | 0.919 | 0.734 | 0.760 | 0.802 | 0.705 |
| 722 | 0.887 | 0.726 | 0.743 | 0.784 | 0.677 |
| 723 | 0.913 | 0.744 | 0.775 | 0.809 | 0.715 |
| 724 | 0.910 | 0.718 | 0.751 | 0.791 | 0.688 |
| 725 | 0.928 | 0.742 | 0.754 | 0.806 | 0.710 |
| 726 | 0.925 | 0.718 | 0.766 | 0.800 | 0.702 |
| 727 | 0.902 | 0.726 | 0.769 | 0.797 | 0.697 |
| 728 | 0.910 | 0.752 | 0.751 | 0.803 | 0.706 |
| 729 | 0.919 | 0.749 | 0.769 | 0.811 | 0.717 |
| 730 | 0.899 | 0.734 | 0.781 | 0.802 | 0.706 |
| 731 | 0.916 | 0.747 | 0.775 | 0.811 | 0.717 |
| 732 | 0.928 | 0.742 | 0.787 | 0.816 | 0.726 |
| 733 | 0.922 | 0.736 | 0.757 | 0.803 | 0.706 |
| 734 | 0.913 | 0.747 | 0.772 | 0.809 | 0.714 |
| 735 | 0.899 | 0.749 | 0.772 | 0.805 | 0.709 |
| 736 | 0.919 | 0.760 | 0.757 | 0.811 | 0.716 |
| 737 | 0.939 | 0.757 | 0.757 | 0.816 | 0.725 |
| 738 | 0.916 | 0.739 | 0.754 | 0.801 | 0.703 |
| 739 | 0.931 | 0.721 | 0.796 | 0.813 | 0.721 |
| 740 | 0.931 | 0.749 | 0.766 | 0.813 | 0.721 |

|     |       |       |       |       |       |
|-----|-------|-------|-------|-------|-------|
| 741 | 0.908 | 0.755 | 0.734 | 0.798 | 0.696 |
| 742 | 0.922 | 0.718 | 0.760 | 0.798 | 0.698 |
| 743 | 0.919 | 0.731 | 0.784 | 0.809 | 0.715 |
| 744 | 0.916 | 0.760 | 0.754 | 0.809 | 0.714 |
| 745 | 0.931 | 0.726 | 0.766 | 0.805 | 0.709 |
| 746 | 0.922 | 0.711 | 0.775 | 0.799 | 0.701 |
| 747 | 0.922 | 0.693 | 0.793 | 0.799 | 0.701 |
| 748 | 0.928 | 0.736 | 0.751 | 0.803 | 0.705 |
| 749 | 0.919 | 0.736 | 0.769 | 0.806 | 0.710 |
| 750 | 0.916 | 0.731 | 0.772 | 0.804 | 0.708 |
| 751 | 0.928 | 0.726 | 0.769 | 0.805 | 0.709 |
| 752 | 0.945 | 0.731 | 0.781 | 0.816 | 0.726 |
| 753 | 0.902 | 0.734 | 0.766 | 0.799 | 0.699 |
| 754 | 0.908 | 0.718 | 0.781 | 0.799 | 0.702 |
| 755 | 0.908 | 0.736 | 0.746 | 0.795 | 0.693 |
| 756 | 0.913 | 0.734 | 0.757 | 0.799 | 0.700 |
| 757 | 0.928 | 0.721 | 0.763 | 0.801 | 0.703 |
| 758 | 0.902 | 0.726 | 0.784 | 0.801 | 0.704 |
| 759 | 0.928 | 0.721 | 0.775 | 0.805 | 0.710 |
| 760 | 0.902 | 0.731 | 0.763 | 0.797 | 0.697 |
| 761 | 0.919 | 0.711 | 0.772 | 0.798 | 0.699 |
| 762 | 0.916 | 0.744 | 0.760 | 0.805 | 0.708 |
| 763 | 0.899 | 0.742 | 0.751 | 0.796 | 0.695 |
| 764 | 0.922 | 0.729 | 0.746 | 0.797 | 0.696 |
| 765 | 0.905 | 0.731 | 0.749 | 0.793 | 0.690 |
| 766 | 0.905 | 0.726 | 0.772 | 0.799 | 0.700 |
| 767 | 0.922 | 0.726 | 0.757 | 0.799 | 0.701 |
| 768 | 0.919 | 0.736 | 0.743 | 0.798 | 0.697 |
| 769 | 0.919 | 0.724 | 0.766 | 0.800 | 0.702 |
| 770 | 0.916 | 0.734 | 0.757 | 0.800 | 0.702 |
| 771 | 0.905 | 0.747 | 0.760 | 0.802 | 0.704 |
| 772 | 0.899 | 0.700 | 0.775 | 0.788 | 0.685 |
| 773 | 0.922 | 0.700 | 0.757 | 0.790 | 0.687 |
| 774 | 0.910 | 0.729 | 0.760 | 0.798 | 0.698 |
| 775 | 0.922 | 0.695 | 0.757 | 0.788 | 0.685 |
| 776 | 0.910 | 0.724 | 0.763 | 0.797 | 0.697 |
| 777 | 0.939 | 0.703 | 0.772 | 0.801 | 0.704 |
| 778 | 0.925 | 0.734 | 0.769 | 0.807 | 0.712 |
| 779 | 0.902 | 0.742 | 0.749 | 0.796 | 0.694 |
| 780 | 0.913 | 0.724 | 0.778 | 0.802 | 0.705 |
| 781 | 0.942 | 0.731 | 0.766 | 0.811 | 0.717 |
| 782 | 0.931 | 0.739 | 0.763 | 0.809 | 0.714 |

|                            |           |             |          |            |            |
|----------------------------|-----------|-------------|----------|------------|------------|
| 783                        | 0.919     | 0.713       | 0.763    | 0.796      | 0.695      |
| 784                        | 0.896     | 0.724       | 0.781    | 0.798      | 0.699      |
| 785                        | 0.908     | 0.736       | 0.763    | 0.800      | 0.702      |
| 786                        | 0.925     | 0.744       | 0.763    | 0.809      | 0.714      |
| 787                        | 0.916     | 0.731       | 0.760    | 0.800      | 0.702      |
| 788                        | 0.922     | 0.718       | 0.763    | 0.799      | 0.699      |
| <b>SHAP by lightGBM</b>    |           |             |          |            |            |
| <b>Numbers of features</b> | <b>G1</b> | <b>G2/M</b> | <b>S</b> | <b>ACC</b> | <b>MCC</b> |
| 1                          | 0.913     | 0.643       | 0.578    | 0.710      | 0.566      |
| 2                          | 0.942     | 0.693       | 0.671    | 0.767      | 0.650      |
| 3                          | 0.939     | 0.685       | 0.653    | 0.757      | 0.636      |
| 4                          | 0.942     | 0.695       | 0.710    | 0.780      | 0.670      |
| 5                          | 0.957     | 0.682       | 0.704    | 0.778      | 0.668      |
| 6                          | 0.957     | 0.685       | 0.728    | 0.786      | 0.682      |
| 7                          | 0.942     | 0.713       | 0.731    | 0.793      | 0.690      |
| 8                          | 0.962     | 0.749       | 0.751    | 0.819      | 0.729      |
| 9                          | 0.948     | 0.780       | 0.760    | 0.828      | 0.743      |
| 10                         | 0.960     | 0.793       | 0.802    | 0.850      | 0.775      |
| 11                         | 0.954     | 0.788       | 0.790    | 0.843      | 0.764      |
| 12                         | 0.965     | 0.811       | 0.778    | 0.851      | 0.776      |
| 13                         | 0.962     | 0.817       | 0.790    | 0.856      | 0.783      |
| 14                         | 0.962     | 0.824       | 0.790    | 0.858      | 0.788      |
| 15                         | 0.965     | 0.819       | 0.790    | 0.858      | 0.786      |
| 16                         | 0.960     | 0.809       | 0.802    | 0.856      | 0.784      |
| 17                         | 0.971     | 0.811       | 0.784    | 0.855      | 0.782      |
| 18                         | 0.977     | 0.804       | 0.823    | 0.866      | 0.800      |
| 19                         | 0.971     | 0.809       | 0.787    | 0.855      | 0.782      |
| 20                         | 0.971     | 0.806       | 0.808    | 0.860      | 0.791      |
| 21                         | 0.968     | 0.804       | 0.808    | 0.858      | 0.788      |
| 22                         | 0.983     | 0.804       | 0.811    | 0.864      | 0.797      |
| 23                         | 0.977     | 0.809       | 0.811    | 0.864      | 0.796      |
| 24                         | 0.977     | 0.801       | 0.814    | 0.862      | 0.794      |
| 25                         | 0.971     | 0.798       | 0.820    | 0.861      | 0.793      |
| 26                         | 0.960     | 0.806       | 0.814    | 0.858      | 0.788      |
| 27                         | 0.965     | 0.798       | 0.817    | 0.858      | 0.788      |
| 28                         | 0.971     | 0.806       | 0.817    | 0.863      | 0.795      |
| 29                         | 0.974     | 0.824       | 0.802    | 0.866      | 0.799      |
| 30                         | 0.965     | 0.811       | 0.799    | 0.858      | 0.786      |
| 31                         | 0.965     | 0.806       | 0.826    | 0.864      | 0.797      |
| 32                         | 0.965     | 0.817       | 0.805    | 0.861      | 0.792      |
| 33                         | 0.962     | 0.806       | 0.814    | 0.859      | 0.790      |
| 34                         | 0.965     | 0.783       | 0.805    | 0.849      | 0.775      |

|    |       |       |       |       |       |
|----|-------|-------|-------|-------|-------|
| 35 | 0.968 | 0.775 | 0.799 | 0.845 | 0.769 |
| 36 | 0.977 | 0.775 | 0.793 | 0.846 | 0.770 |
| 37 | 0.974 | 0.791 | 0.790 | 0.850 | 0.775 |
| 38 | 0.971 | 0.786 | 0.787 | 0.846 | 0.770 |
| 39 | 0.974 | 0.786 | 0.787 | 0.847 | 0.771 |
| 40 | 0.971 | 0.775 | 0.793 | 0.844 | 0.767 |
| 41 | 0.968 | 0.778 | 0.778 | 0.840 | 0.760 |
| 42 | 0.977 | 0.783 | 0.793 | 0.849 | 0.774 |
| 43 | 0.965 | 0.780 | 0.811 | 0.850 | 0.776 |
| 44 | 0.974 | 0.814 | 0.775 | 0.854 | 0.780 |
| 45 | 0.968 | 0.806 | 0.787 | 0.853 | 0.779 |
| 46 | 0.980 | 0.798 | 0.817 | 0.863 | 0.795 |
| 47 | 0.957 | 0.824 | 0.790 | 0.857 | 0.785 |
| 48 | 0.971 | 0.832 | 0.790 | 0.864 | 0.796 |
| 49 | 0.977 | 0.827 | 0.781 | 0.861 | 0.792 |
| 50 | 0.971 | 0.819 | 0.799 | 0.862 | 0.793 |
| 51 | 0.977 | 0.814 | 0.799 | 0.862 | 0.794 |
| 52 | 0.968 | 0.829 | 0.793 | 0.863 | 0.795 |
| 53 | 0.965 | 0.824 | 0.787 | 0.858 | 0.788 |
| 54 | 0.980 | 0.829 | 0.790 | 0.866 | 0.799 |
| 55 | 0.962 | 0.829 | 0.799 | 0.863 | 0.795 |
| 56 | 0.962 | 0.824 | 0.790 | 0.858 | 0.788 |
| 57 | 0.965 | 0.824 | 0.796 | 0.861 | 0.792 |
| 58 | 0.960 | 0.832 | 0.790 | 0.860 | 0.790 |
| 59 | 0.971 | 0.824 | 0.787 | 0.860 | 0.790 |
| 60 | 0.965 | 0.824 | 0.802 | 0.863 | 0.795 |
| 61 | 0.974 | 0.814 | 0.784 | 0.857 | 0.785 |
| 62 | 0.965 | 0.817 | 0.811 | 0.863 | 0.795 |
| 63 | 0.960 | 0.804 | 0.784 | 0.848 | 0.772 |
| 64 | 0.968 | 0.801 | 0.778 | 0.848 | 0.772 |
| 65 | 0.968 | 0.796 | 0.784 | 0.848 | 0.772 |
| 66 | 0.968 | 0.796 | 0.781 | 0.847 | 0.771 |
| 67 | 0.965 | 0.791 | 0.793 | 0.848 | 0.773 |
| 68 | 0.968 | 0.801 | 0.775 | 0.847 | 0.771 |
| 69 | 0.977 | 0.796 | 0.778 | 0.849 | 0.774 |
| 70 | 0.974 | 0.793 | 0.778 | 0.847 | 0.771 |
| 71 | 0.974 | 0.793 | 0.781 | 0.848 | 0.772 |
| 72 | 0.965 | 0.798 | 0.790 | 0.850 | 0.775 |
| 73 | 0.968 | 0.783 | 0.778 | 0.842 | 0.763 |
| 74 | 0.974 | 0.801 | 0.757 | 0.843 | 0.765 |
| 75 | 0.971 | 0.798 | 0.772 | 0.846 | 0.769 |
| 76 | 0.971 | 0.798 | 0.811 | 0.858 | 0.788 |



|     |       |       |       |       |       |
|-----|-------|-------|-------|-------|-------|
| 77  | 0.971 | 0.793 | 0.814 | 0.858 | 0.787 |
| 78  | 0.971 | 0.798 | 0.796 | 0.854 | 0.781 |
| 79  | 0.977 | 0.791 | 0.790 | 0.851 | 0.777 |
| 80  | 0.971 | 0.788 | 0.796 | 0.850 | 0.776 |
| 81  | 0.974 | 0.791 | 0.799 | 0.853 | 0.780 |
| 82  | 0.974 | 0.804 | 0.799 | 0.858 | 0.786 |
| 83  | 0.968 | 0.780 | 0.802 | 0.848 | 0.773 |
| 84  | 0.974 | 0.804 | 0.796 | 0.857 | 0.785 |
| 85  | 0.971 | 0.791 | 0.805 | 0.854 | 0.781 |
| 86  | 0.974 | 0.783 | 0.826 | 0.858 | 0.789 |
| 87  | 0.971 | 0.791 | 0.799 | 0.852 | 0.778 |
| 88  | 0.968 | 0.749 | 0.808 | 0.839 | 0.760 |
| 89  | 0.971 | 0.755 | 0.802 | 0.840 | 0.761 |
| 90  | 0.965 | 0.762 | 0.799 | 0.840 | 0.761 |
| 91  | 0.971 | 0.752 | 0.814 | 0.843 | 0.766 |
| 92  | 0.968 | 0.739 | 0.817 | 0.838 | 0.759 |
| 93  | 0.962 | 0.752 | 0.814 | 0.840 | 0.761 |
| 94  | 0.974 | 0.757 | 0.811 | 0.844 | 0.768 |
| 95  | 0.974 | 0.729 | 0.796 | 0.829 | 0.746 |
| 96  | 0.980 | 0.755 | 0.784 | 0.837 | 0.756 |
| 97  | 0.968 | 0.747 | 0.802 | 0.836 | 0.756 |
| 98  | 0.971 | 0.739 | 0.799 | 0.833 | 0.752 |
| 99  | 0.968 | 0.757 | 0.796 | 0.838 | 0.758 |
| 100 | 0.971 | 0.744 | 0.808 | 0.838 | 0.759 |
| 101 | 0.971 | 0.747 | 0.805 | 0.838 | 0.759 |
| 102 | 0.968 | 0.734 | 0.811 | 0.834 | 0.754 |
| 103 | 0.962 | 0.755 | 0.784 | 0.831 | 0.748 |
| 104 | 0.968 | 0.736 | 0.796 | 0.830 | 0.748 |
| 105 | 0.974 | 0.757 | 0.787 | 0.837 | 0.756 |
| 106 | 0.968 | 0.742 | 0.802 | 0.834 | 0.753 |
| 107 | 0.974 | 0.736 | 0.808 | 0.836 | 0.756 |
| 108 | 0.974 | 0.749 | 0.802 | 0.839 | 0.760 |
| 109 | 0.974 | 0.749 | 0.796 | 0.837 | 0.757 |
| 110 | 0.974 | 0.747 | 0.793 | 0.835 | 0.754 |
| 111 | 0.971 | 0.752 | 0.799 | 0.838 | 0.758 |
| 112 | 0.965 | 0.760 | 0.811 | 0.843 | 0.765 |
| 113 | 0.960 | 0.734 | 0.817 | 0.833 | 0.753 |
| 114 | 0.977 | 0.734 | 0.805 | 0.835 | 0.755 |
| 115 | 0.983 | 0.752 | 0.799 | 0.842 | 0.764 |
| 116 | 0.968 | 0.755 | 0.802 | 0.839 | 0.760 |
| 117 | 0.965 | 0.757 | 0.784 | 0.833 | 0.751 |
| 118 | 0.965 | 0.755 | 0.805 | 0.839 | 0.760 |

|     |       |       |       |       |       |
|-----|-------|-------|-------|-------|-------|
| 119 | 0.971 | 0.736 | 0.817 | 0.838 | 0.759 |
| 120 | 0.971 | 0.739 | 0.802 | 0.834 | 0.753 |
| 121 | 0.968 | 0.757 | 0.799 | 0.839 | 0.760 |
| 122 | 0.968 | 0.752 | 0.790 | 0.834 | 0.752 |
| 123 | 0.974 | 0.739 | 0.811 | 0.838 | 0.759 |
| 124 | 0.962 | 0.757 | 0.802 | 0.838 | 0.758 |
| 125 | 0.951 | 0.775 | 0.808 | 0.843 | 0.765 |
| 126 | 0.962 | 0.760 | 0.823 | 0.845 | 0.770 |
| 127 | 0.960 | 0.765 | 0.811 | 0.843 | 0.765 |
| 128 | 0.962 | 0.767 | 0.808 | 0.843 | 0.766 |
| 129 | 0.962 | 0.775 | 0.814 | 0.848 | 0.773 |
| 130 | 0.962 | 0.767 | 0.796 | 0.840 | 0.760 |
| 131 | 0.957 | 0.762 | 0.829 | 0.846 | 0.772 |
| 132 | 0.962 | 0.736 | 0.820 | 0.836 | 0.757 |
| 133 | 0.968 | 0.760 | 0.829 | 0.849 | 0.776 |
| 134 | 0.957 | 0.770 | 0.802 | 0.841 | 0.762 |
| 135 | 0.960 | 0.775 | 0.805 | 0.844 | 0.768 |
| 136 | 0.960 | 0.770 | 0.790 | 0.838 | 0.758 |
| 137 | 0.974 | 0.778 | 0.829 | 0.858 | 0.788 |
| 138 | 0.965 | 0.760 | 0.829 | 0.848 | 0.774 |
| 139 | 0.954 | 0.778 | 0.808 | 0.844 | 0.768 |
| 140 | 0.971 | 0.739 | 0.826 | 0.842 | 0.765 |
| 141 | 0.962 | 0.747 | 0.814 | 0.838 | 0.759 |
| 142 | 0.951 | 0.742 | 0.832 | 0.838 | 0.760 |
| 143 | 0.962 | 0.762 | 0.814 | 0.843 | 0.767 |
| 144 | 0.960 | 0.775 | 0.820 | 0.849 | 0.775 |
| 145 | 0.957 | 0.744 | 0.835 | 0.842 | 0.766 |
| 146 | 0.962 | 0.775 | 0.802 | 0.844 | 0.768 |
| 147 | 0.960 | 0.775 | 0.817 | 0.848 | 0.774 |
| 148 | 0.951 | 0.773 | 0.814 | 0.843 | 0.767 |
| 149 | 0.960 | 0.757 | 0.817 | 0.842 | 0.764 |
| 150 | 0.957 | 0.778 | 0.790 | 0.840 | 0.760 |
| 151 | 0.968 | 0.757 | 0.826 | 0.847 | 0.773 |
| 152 | 0.962 | 0.731 | 0.847 | 0.843 | 0.768 |
| 153 | 0.957 | 0.760 | 0.817 | 0.842 | 0.764 |
| 154 | 0.962 | 0.770 | 0.799 | 0.842 | 0.763 |
| 155 | 0.962 | 0.780 | 0.805 | 0.847 | 0.772 |
| 156 | 0.957 | 0.752 | 0.802 | 0.834 | 0.753 |
| 157 | 0.954 | 0.770 | 0.805 | 0.841 | 0.762 |
| 158 | 0.962 | 0.775 | 0.814 | 0.848 | 0.773 |
| 159 | 0.960 | 0.767 | 0.823 | 0.847 | 0.773 |
| 160 | 0.960 | 0.773 | 0.817 | 0.847 | 0.772 |

|     |       |       |       |       |       |
|-----|-------|-------|-------|-------|-------|
| 161 | 0.960 | 0.786 | 0.793 | 0.844 | 0.767 |
| 162 | 0.962 | 0.765 | 0.811 | 0.843 | 0.767 |
| 163 | 0.957 | 0.780 | 0.823 | 0.851 | 0.778 |
| 164 | 0.962 | 0.770 | 0.817 | 0.847 | 0.772 |
| 165 | 0.960 | 0.765 | 0.811 | 0.843 | 0.765 |
| 166 | 0.965 | 0.762 | 0.814 | 0.844 | 0.768 |
| 167 | 0.960 | 0.783 | 0.805 | 0.847 | 0.772 |
| 168 | 0.957 | 0.780 | 0.811 | 0.847 | 0.772 |
| 169 | 0.960 | 0.765 | 0.799 | 0.839 | 0.759 |
| 170 | 0.960 | 0.762 | 0.796 | 0.837 | 0.757 |
| 171 | 0.965 | 0.760 | 0.796 | 0.838 | 0.758 |
| 172 | 0.954 | 0.755 | 0.817 | 0.839 | 0.760 |
| 173 | 0.960 | 0.770 | 0.820 | 0.847 | 0.773 |
| 174 | 0.962 | 0.778 | 0.793 | 0.843 | 0.764 |
| 175 | 0.954 | 0.773 | 0.811 | 0.843 | 0.766 |
| 176 | 0.954 | 0.749 | 0.808 | 0.834 | 0.753 |
| 177 | 0.957 | 0.762 | 0.817 | 0.843 | 0.766 |
| 178 | 0.960 | 0.755 | 0.808 | 0.838 | 0.759 |
| 179 | 0.948 | 0.762 | 0.814 | 0.839 | 0.760 |
| 180 | 0.960 | 0.773 | 0.796 | 0.841 | 0.762 |
| 181 | 0.962 | 0.770 | 0.793 | 0.840 | 0.760 |
| 182 | 0.951 | 0.783 | 0.811 | 0.846 | 0.770 |
| 183 | 0.960 | 0.770 | 0.814 | 0.845 | 0.769 |
| 184 | 0.957 | 0.783 | 0.841 | 0.858 | 0.788 |
| 185 | 0.960 | 0.780 | 0.832 | 0.855 | 0.784 |
| 186 | 0.960 | 0.770 | 0.823 | 0.848 | 0.774 |
| 187 | 0.960 | 0.775 | 0.820 | 0.849 | 0.775 |
| 188 | 0.960 | 0.770 | 0.826 | 0.849 | 0.775 |
| 189 | 0.957 | 0.786 | 0.799 | 0.845 | 0.769 |
| 190 | 0.960 | 0.775 | 0.817 | 0.848 | 0.774 |
| 191 | 0.960 | 0.773 | 0.814 | 0.846 | 0.771 |
| 192 | 0.960 | 0.775 | 0.841 | 0.856 | 0.785 |
| 193 | 0.957 | 0.775 | 0.826 | 0.850 | 0.777 |
| 194 | 0.957 | 0.783 | 0.811 | 0.848 | 0.773 |
| 195 | 0.962 | 0.762 | 0.826 | 0.847 | 0.773 |
| 196 | 0.954 | 0.778 | 0.808 | 0.844 | 0.768 |
| 197 | 0.957 | 0.767 | 0.805 | 0.841 | 0.762 |
| 198 | 0.962 | 0.744 | 0.832 | 0.843 | 0.767 |
| 199 | 0.954 | 0.765 | 0.796 | 0.836 | 0.755 |
| 200 | 0.965 | 0.724 | 0.796 | 0.825 | 0.740 |
| 201 | 0.968 | 0.742 | 0.766 | 0.823 | 0.735 |
| 202 | 0.957 | 0.739 | 0.790 | 0.826 | 0.740 |

|     |       |       |       |       |       |
|-----|-------|-------|-------|-------|-------|
| 203 | 0.965 | 0.755 | 0.790 | 0.834 | 0.752 |
| 204 | 0.962 | 0.744 | 0.784 | 0.828 | 0.743 |
| 205 | 0.965 | 0.734 | 0.787 | 0.826 | 0.740 |
| 206 | 0.962 | 0.744 | 0.796 | 0.831 | 0.749 |
| 207 | 0.968 | 0.744 | 0.772 | 0.826 | 0.739 |
| 208 | 0.965 | 0.765 | 0.778 | 0.834 | 0.752 |
| 209 | 0.974 | 0.747 | 0.778 | 0.830 | 0.747 |
| 210 | 0.971 | 0.736 | 0.775 | 0.825 | 0.738 |
| 211 | 0.971 | 0.762 | 0.775 | 0.834 | 0.752 |
| 212 | 0.965 | 0.749 | 0.790 | 0.832 | 0.750 |
| 213 | 0.971 | 0.744 | 0.763 | 0.824 | 0.736 |
| 214 | 0.971 | 0.718 | 0.805 | 0.828 | 0.744 |
| 215 | 0.977 | 0.736 | 0.778 | 0.828 | 0.743 |
| 216 | 0.965 | 0.744 | 0.778 | 0.827 | 0.741 |
| 217 | 0.974 | 0.744 | 0.766 | 0.826 | 0.739 |
| 218 | 0.971 | 0.747 | 0.787 | 0.832 | 0.750 |
| 219 | 0.974 | 0.757 | 0.769 | 0.831 | 0.747 |
| 220 | 0.968 | 0.726 | 0.778 | 0.821 | 0.733 |
| 221 | 0.960 | 0.734 | 0.772 | 0.819 | 0.730 |
| 222 | 0.965 | 0.742 | 0.775 | 0.825 | 0.738 |
| 223 | 0.968 | 0.716 | 0.784 | 0.819 | 0.731 |
| 224 | 0.962 | 0.747 | 0.793 | 0.831 | 0.748 |
| 225 | 0.965 | 0.747 | 0.793 | 0.832 | 0.750 |
| 226 | 0.968 | 0.736 | 0.760 | 0.819 | 0.729 |
| 227 | 0.968 | 0.744 | 0.781 | 0.828 | 0.744 |
| 228 | 0.965 | 0.744 | 0.787 | 0.829 | 0.745 |
| 229 | 0.960 | 0.721 | 0.793 | 0.821 | 0.734 |
| 230 | 0.962 | 0.729 | 0.811 | 0.830 | 0.748 |
| 231 | 0.957 | 0.736 | 0.793 | 0.826 | 0.740 |
| 232 | 0.968 | 0.739 | 0.778 | 0.826 | 0.740 |
| 233 | 0.962 | 0.739 | 0.787 | 0.827 | 0.741 |
| 234 | 0.962 | 0.736 | 0.805 | 0.831 | 0.749 |
| 235 | 0.965 | 0.734 | 0.814 | 0.834 | 0.754 |
| 236 | 0.968 | 0.744 | 0.784 | 0.829 | 0.746 |
| 237 | 0.960 | 0.734 | 0.802 | 0.828 | 0.745 |
| 238 | 0.954 | 0.724 | 0.796 | 0.821 | 0.734 |
| 239 | 0.951 | 0.742 | 0.808 | 0.830 | 0.748 |
| 240 | 0.945 | 0.731 | 0.814 | 0.827 | 0.743 |
| 241 | 0.954 | 0.742 | 0.790 | 0.826 | 0.740 |
| 242 | 0.960 | 0.734 | 0.826 | 0.836 | 0.757 |
| 243 | 0.957 | 0.734 | 0.802 | 0.828 | 0.744 |
| 244 | 0.954 | 0.749 | 0.784 | 0.827 | 0.741 |

|     |       |       |       |       |       |
|-----|-------|-------|-------|-------|-------|
| 245 | 0.957 | 0.726 | 0.814 | 0.828 | 0.746 |
| 246 | 0.962 | 0.739 | 0.787 | 0.827 | 0.742 |
| 247 | 0.957 | 0.744 | 0.796 | 0.829 | 0.746 |
| 248 | 0.960 | 0.716 | 0.808 | 0.824 | 0.739 |
| 249 | 0.960 | 0.742 | 0.817 | 0.836 | 0.756 |
| 250 | 0.965 | 0.729 | 0.793 | 0.826 | 0.741 |
| 251 | 0.954 | 0.755 | 0.793 | 0.831 | 0.748 |
| 252 | 0.954 | 0.726 | 0.808 | 0.826 | 0.741 |
| 253 | 0.962 | 0.736 | 0.805 | 0.831 | 0.749 |
| 254 | 0.954 | 0.724 | 0.817 | 0.828 | 0.745 |
| 255 | 0.965 | 0.716 | 0.805 | 0.825 | 0.741 |
| 256 | 0.957 | 0.736 | 0.793 | 0.826 | 0.740 |
| 257 | 0.962 | 0.742 | 0.814 | 0.836 | 0.756 |
| 258 | 0.954 | 0.713 | 0.817 | 0.824 | 0.740 |
| 259 | 0.951 | 0.739 | 0.802 | 0.828 | 0.744 |
| 260 | 0.957 | 0.744 | 0.796 | 0.829 | 0.746 |
| 261 | 0.960 | 0.729 | 0.790 | 0.823 | 0.736 |
| 262 | 0.954 | 0.734 | 0.793 | 0.824 | 0.738 |
| 263 | 0.965 | 0.718 | 0.817 | 0.829 | 0.748 |
| 264 | 0.965 | 0.729 | 0.787 | 0.824 | 0.738 |
| 265 | 0.954 | 0.742 | 0.799 | 0.828 | 0.745 |
| 266 | 0.960 | 0.721 | 0.781 | 0.817 | 0.728 |
| 267 | 0.965 | 0.726 | 0.802 | 0.828 | 0.744 |
| 268 | 0.962 | 0.731 | 0.796 | 0.827 | 0.742 |
| 269 | 0.954 | 0.731 | 0.802 | 0.826 | 0.741 |
| 270 | 0.968 | 0.742 | 0.799 | 0.833 | 0.751 |
| 271 | 0.968 | 0.736 | 0.811 | 0.835 | 0.755 |
| 272 | 0.962 | 0.739 | 0.796 | 0.829 | 0.746 |
| 273 | 0.960 | 0.744 | 0.793 | 0.829 | 0.746 |
| 274 | 0.960 | 0.736 | 0.784 | 0.824 | 0.737 |
| 275 | 0.965 | 0.729 | 0.784 | 0.823 | 0.736 |
| 276 | 0.965 | 0.739 | 0.796 | 0.830 | 0.747 |
| 277 | 0.968 | 0.731 | 0.805 | 0.831 | 0.749 |
| 278 | 0.965 | 0.716 | 0.790 | 0.820 | 0.732 |
| 279 | 0.965 | 0.718 | 0.814 | 0.828 | 0.746 |
| 280 | 0.962 | 0.734 | 0.775 | 0.821 | 0.733 |
| 281 | 0.962 | 0.700 | 0.805 | 0.818 | 0.731 |
| 282 | 0.965 | 0.718 | 0.796 | 0.823 | 0.737 |
| 283 | 0.960 | 0.729 | 0.802 | 0.827 | 0.742 |
| 284 | 0.957 | 0.724 | 0.802 | 0.824 | 0.738 |
| 285 | 0.960 | 0.721 | 0.817 | 0.828 | 0.746 |
| 286 | 0.954 | 0.721 | 0.817 | 0.827 | 0.743 |

|     |       |       |       |       |       |
|-----|-------|-------|-------|-------|-------|
| 287 | 0.962 | 0.729 | 0.823 | 0.834 | 0.754 |
| 288 | 0.971 | 0.718 | 0.811 | 0.829 | 0.747 |
| 289 | 0.962 | 0.705 | 0.817 | 0.824 | 0.740 |
| 290 | 0.960 | 0.731 | 0.799 | 0.827 | 0.742 |
| 291 | 0.962 | 0.731 | 0.799 | 0.828 | 0.744 |
| 292 | 0.960 | 0.729 | 0.805 | 0.828 | 0.744 |
| 293 | 0.962 | 0.698 | 0.796 | 0.814 | 0.725 |
| 294 | 0.960 | 0.711 | 0.817 | 0.825 | 0.741 |
| 295 | 0.968 | 0.726 | 0.826 | 0.836 | 0.757 |
| 296 | 0.960 | 0.731 | 0.793 | 0.825 | 0.739 |
| 297 | 0.951 | 0.724 | 0.808 | 0.824 | 0.739 |
| 298 | 0.962 | 0.721 | 0.808 | 0.827 | 0.743 |
| 299 | 0.957 | 0.726 | 0.808 | 0.827 | 0.743 |
| 300 | 0.965 | 0.724 | 0.796 | 0.825 | 0.740 |
| 301 | 0.951 | 0.742 | 0.808 | 0.830 | 0.748 |
| 302 | 0.971 | 0.726 | 0.826 | 0.837 | 0.759 |
| 303 | 0.962 | 0.724 | 0.820 | 0.831 | 0.750 |
| 304 | 0.948 | 0.726 | 0.790 | 0.818 | 0.729 |
| 305 | 0.965 | 0.731 | 0.796 | 0.828 | 0.743 |
| 306 | 0.957 | 0.718 | 0.790 | 0.818 | 0.729 |
| 307 | 0.971 | 0.724 | 0.802 | 0.828 | 0.745 |
| 308 | 0.965 | 0.729 | 0.808 | 0.830 | 0.748 |
| 309 | 0.954 | 0.731 | 0.805 | 0.827 | 0.742 |
| 310 | 0.965 | 0.718 | 0.817 | 0.829 | 0.748 |
| 311 | 0.960 | 0.726 | 0.796 | 0.824 | 0.738 |
| 312 | 0.957 | 0.739 | 0.787 | 0.825 | 0.739 |
| 313 | 0.939 | 0.721 | 0.814 | 0.821 | 0.735 |
| 314 | 0.936 | 0.734 | 0.784 | 0.815 | 0.725 |
| 315 | 0.936 | 0.729 | 0.805 | 0.820 | 0.733 |
| 316 | 0.954 | 0.742 | 0.766 | 0.818 | 0.728 |
| 317 | 0.957 | 0.731 | 0.814 | 0.830 | 0.748 |
| 318 | 0.951 | 0.726 | 0.826 | 0.830 | 0.749 |
| 319 | 0.954 | 0.747 | 0.805 | 0.832 | 0.750 |
| 320 | 0.951 | 0.742 | 0.832 | 0.838 | 0.760 |
| 321 | 0.945 | 0.744 | 0.802 | 0.828 | 0.743 |
| 322 | 0.954 | 0.721 | 0.811 | 0.825 | 0.740 |
| 323 | 0.954 | 0.734 | 0.817 | 0.831 | 0.750 |
| 324 | 0.951 | 0.739 | 0.805 | 0.828 | 0.745 |
| 325 | 0.960 | 0.700 | 0.784 | 0.811 | 0.719 |
| 326 | 0.965 | 0.742 | 0.793 | 0.830 | 0.747 |
| 327 | 0.951 | 0.713 | 0.820 | 0.824 | 0.739 |
| 328 | 0.960 | 0.736 | 0.799 | 0.828 | 0.745 |

|     |       |       |       |       |       |
|-----|-------|-------|-------|-------|-------|
| 329 | 0.957 | 0.747 | 0.814 | 0.836 | 0.756 |
| 330 | 0.960 | 0.734 | 0.793 | 0.826 | 0.740 |
| 331 | 0.957 | 0.729 | 0.793 | 0.823 | 0.736 |
| 332 | 0.957 | 0.731 | 0.802 | 0.827 | 0.742 |
| 333 | 0.957 | 0.755 | 0.796 | 0.833 | 0.751 |
| 334 | 0.962 | 0.734 | 0.805 | 0.830 | 0.748 |
| 335 | 0.957 | 0.729 | 0.802 | 0.826 | 0.741 |
| 336 | 0.962 | 0.755 | 0.802 | 0.837 | 0.757 |
| 337 | 0.954 | 0.721 | 0.796 | 0.820 | 0.733 |
| 338 | 0.971 | 0.718 | 0.796 | 0.825 | 0.740 |
| 339 | 0.962 | 0.734 | 0.769 | 0.819 | 0.730 |
| 340 | 0.965 | 0.742 | 0.820 | 0.839 | 0.761 |
| 341 | 0.951 | 0.731 | 0.817 | 0.829 | 0.747 |
| 342 | 0.954 | 0.747 | 0.781 | 0.825 | 0.738 |
| 343 | 0.957 | 0.736 | 0.814 | 0.832 | 0.751 |
| 344 | 0.954 | 0.734 | 0.820 | 0.832 | 0.751 |
| 345 | 0.960 | 0.721 | 0.811 | 0.827 | 0.743 |
| 346 | 0.951 | 0.734 | 0.808 | 0.828 | 0.744 |
| 347 | 0.957 | 0.718 | 0.817 | 0.827 | 0.743 |
| 348 | 0.948 | 0.721 | 0.817 | 0.825 | 0.740 |
| 349 | 0.954 | 0.742 | 0.802 | 0.829 | 0.746 |
| 350 | 0.948 | 0.744 | 0.796 | 0.827 | 0.741 |
| 351 | 0.957 | 0.724 | 0.805 | 0.825 | 0.740 |
| 352 | 0.965 | 0.721 | 0.802 | 0.826 | 0.741 |
| 353 | 0.948 | 0.742 | 0.808 | 0.829 | 0.746 |
| 354 | 0.951 | 0.752 | 0.793 | 0.829 | 0.745 |
| 355 | 0.954 | 0.726 | 0.811 | 0.827 | 0.743 |
| 356 | 0.957 | 0.731 | 0.805 | 0.828 | 0.744 |
| 357 | 0.962 | 0.739 | 0.799 | 0.830 | 0.747 |
| 358 | 0.960 | 0.716 | 0.796 | 0.820 | 0.733 |
| 359 | 0.968 | 0.736 | 0.805 | 0.833 | 0.752 |
| 360 | 0.951 | 0.736 | 0.805 | 0.828 | 0.743 |
| 361 | 0.957 | 0.736 | 0.817 | 0.833 | 0.752 |
| 362 | 0.945 | 0.724 | 0.802 | 0.820 | 0.733 |
| 363 | 0.942 | 0.742 | 0.817 | 0.830 | 0.748 |
| 364 | 0.957 | 0.729 | 0.814 | 0.829 | 0.747 |
| 365 | 0.957 | 0.739 | 0.823 | 0.836 | 0.757 |
| 366 | 0.962 | 0.731 | 0.817 | 0.833 | 0.752 |
| 367 | 0.951 | 0.747 | 0.802 | 0.830 | 0.747 |
| 368 | 0.957 | 0.736 | 0.817 | 0.833 | 0.752 |
| 369 | 0.962 | 0.731 | 0.784 | 0.823 | 0.736 |
| 370 | 0.945 | 0.739 | 0.784 | 0.820 | 0.731 |

|     |       |       |       |       |       |
|-----|-------|-------|-------|-------|-------|
| 371 | 0.936 | 0.747 | 0.787 | 0.821 | 0.733 |
| 372 | 0.948 | 0.749 | 0.820 | 0.836 | 0.756 |
| 373 | 0.939 | 0.736 | 0.808 | 0.825 | 0.739 |
| 374 | 0.945 | 0.757 | 0.799 | 0.831 | 0.748 |
| 375 | 0.939 | 0.752 | 0.778 | 0.821 | 0.732 |
| 376 | 0.951 | 0.742 | 0.808 | 0.830 | 0.747 |
| 377 | 0.948 | 0.760 | 0.799 | 0.833 | 0.751 |
| 378 | 0.951 | 0.739 | 0.769 | 0.817 | 0.727 |
| 379 | 0.957 | 0.744 | 0.796 | 0.829 | 0.745 |
| 380 | 0.954 | 0.744 | 0.787 | 0.826 | 0.740 |
| 381 | 0.951 | 0.734 | 0.787 | 0.821 | 0.733 |
| 382 | 0.945 | 0.739 | 0.787 | 0.821 | 0.733 |
| 383 | 0.942 | 0.744 | 0.802 | 0.827 | 0.742 |
| 384 | 0.939 | 0.739 | 0.799 | 0.823 | 0.736 |
| 385 | 0.945 | 0.724 | 0.802 | 0.820 | 0.733 |
| 386 | 0.954 | 0.747 | 0.757 | 0.817 | 0.726 |
| 387 | 0.934 | 0.749 | 0.787 | 0.821 | 0.733 |
| 388 | 0.948 | 0.726 | 0.823 | 0.828 | 0.746 |
| 389 | 0.948 | 0.736 | 0.823 | 0.832 | 0.751 |
| 390 | 0.942 | 0.734 | 0.790 | 0.819 | 0.730 |
| 391 | 0.948 | 0.739 | 0.790 | 0.823 | 0.736 |
| 392 | 0.942 | 0.749 | 0.772 | 0.819 | 0.729 |
| 393 | 0.942 | 0.747 | 0.790 | 0.824 | 0.737 |
| 394 | 0.948 | 0.752 | 0.802 | 0.831 | 0.748 |
| 395 | 0.945 | 0.726 | 0.793 | 0.818 | 0.729 |
| 396 | 0.954 | 0.749 | 0.793 | 0.829 | 0.745 |
| 397 | 0.951 | 0.734 | 0.823 | 0.832 | 0.751 |
| 398 | 0.951 | 0.742 | 0.781 | 0.822 | 0.734 |
| 399 | 0.954 | 0.736 | 0.790 | 0.824 | 0.737 |
| 400 | 0.962 | 0.698 | 0.799 | 0.815 | 0.727 |
| 401 | 0.960 | 0.729 | 0.796 | 0.825 | 0.739 |
| 402 | 0.962 | 0.734 | 0.781 | 0.823 | 0.736 |
| 403 | 0.962 | 0.747 | 0.787 | 0.829 | 0.745 |
| 404 | 0.939 | 0.734 | 0.796 | 0.820 | 0.732 |
| 405 | 0.951 | 0.724 | 0.781 | 0.815 | 0.725 |
| 406 | 0.960 | 0.711 | 0.799 | 0.819 | 0.731 |
| 407 | 0.960 | 0.747 | 0.772 | 0.824 | 0.736 |
| 408 | 0.951 | 0.749 | 0.772 | 0.822 | 0.734 |
| 409 | 0.957 | 0.713 | 0.760 | 0.807 | 0.712 |
| 410 | 0.962 | 0.734 | 0.796 | 0.828 | 0.743 |
| 411 | 0.960 | 0.736 | 0.754 | 0.814 | 0.722 |
| 412 | 0.957 | 0.703 | 0.778 | 0.809 | 0.716 |



|     |       |       |       |       |       |
|-----|-------|-------|-------|-------|-------|
| 413 | 0.951 | 0.721 | 0.766 | 0.810 | 0.716 |
| 414 | 0.968 | 0.718 | 0.772 | 0.816 | 0.726 |
| 415 | 0.951 | 0.721 | 0.772 | 0.812 | 0.719 |
| 416 | 0.948 | 0.718 | 0.769 | 0.809 | 0.715 |
| 417 | 0.965 | 0.705 | 0.784 | 0.814 | 0.724 |
| 418 | 0.954 | 0.736 | 0.799 | 0.827 | 0.742 |
| 419 | 0.954 | 0.708 | 0.793 | 0.814 | 0.725 |
| 420 | 0.957 | 0.731 | 0.754 | 0.812 | 0.718 |
| 421 | 0.954 | 0.739 | 0.757 | 0.814 | 0.722 |
| 422 | 0.954 | 0.726 | 0.799 | 0.823 | 0.737 |
| 423 | 0.957 | 0.711 | 0.790 | 0.815 | 0.726 |
| 424 | 0.960 | 0.729 | 0.769 | 0.816 | 0.726 |
| 425 | 0.960 | 0.724 | 0.775 | 0.816 | 0.726 |
| 426 | 0.960 | 0.703 | 0.787 | 0.813 | 0.722 |
| 427 | 0.954 | 0.713 | 0.778 | 0.812 | 0.720 |
| 428 | 0.960 | 0.736 | 0.766 | 0.818 | 0.728 |
| 429 | 0.945 | 0.731 | 0.778 | 0.815 | 0.725 |
| 430 | 0.942 | 0.744 | 0.757 | 0.813 | 0.719 |
| 431 | 0.951 | 0.716 | 0.793 | 0.816 | 0.727 |
| 432 | 0.951 | 0.731 | 0.778 | 0.817 | 0.727 |
| 433 | 0.948 | 0.726 | 0.787 | 0.817 | 0.728 |
| 434 | 0.957 | 0.721 | 0.778 | 0.815 | 0.725 |
| 435 | 0.960 | 0.705 | 0.799 | 0.817 | 0.729 |
| 436 | 0.957 | 0.726 | 0.775 | 0.816 | 0.726 |
| 437 | 0.957 | 0.713 | 0.787 | 0.815 | 0.725 |
| 438 | 0.957 | 0.716 | 0.778 | 0.813 | 0.722 |
| 439 | 0.962 | 0.724 | 0.787 | 0.821 | 0.734 |
| 440 | 0.957 | 0.721 | 0.772 | 0.813 | 0.722 |
| 441 | 0.945 | 0.716 | 0.796 | 0.815 | 0.726 |
| 442 | 0.939 | 0.718 | 0.799 | 0.815 | 0.726 |
| 443 | 0.936 | 0.724 | 0.766 | 0.806 | 0.710 |
| 444 | 0.957 | 0.708 | 0.743 | 0.799 | 0.700 |
| 445 | 0.962 | 0.739 | 0.781 | 0.825 | 0.739 |
| 446 | 0.960 | 0.729 | 0.790 | 0.823 | 0.737 |
| 447 | 0.960 | 0.726 | 0.763 | 0.813 | 0.722 |
| 448 | 0.960 | 0.726 | 0.784 | 0.820 | 0.732 |
| 449 | 0.939 | 0.736 | 0.781 | 0.816 | 0.726 |
| 450 | 0.957 | 0.708 | 0.784 | 0.813 | 0.722 |
| 451 | 0.954 | 0.716 | 0.775 | 0.812 | 0.719 |
| 452 | 0.957 | 0.726 | 0.817 | 0.829 | 0.747 |
| 453 | 0.962 | 0.724 | 0.784 | 0.820 | 0.732 |
| 454 | 0.951 | 0.700 | 0.802 | 0.813 | 0.724 |

|     |       |       |       |       |       |
|-----|-------|-------|-------|-------|-------|
| 455 | 0.951 | 0.711 | 0.778 | 0.810 | 0.717 |
| 456 | 0.945 | 0.739 | 0.802 | 0.826 | 0.740 |
| 457 | 0.942 | 0.708 | 0.790 | 0.810 | 0.717 |
| 458 | 0.948 | 0.739 | 0.790 | 0.823 | 0.736 |
| 459 | 0.954 | 0.739 | 0.763 | 0.816 | 0.725 |
| 460 | 0.957 | 0.747 | 0.790 | 0.828 | 0.744 |
| 461 | 0.936 | 0.744 | 0.754 | 0.810 | 0.715 |
| 462 | 0.962 | 0.755 | 0.772 | 0.828 | 0.742 |
| 463 | 0.954 | 0.731 | 0.769 | 0.815 | 0.724 |
| 464 | 0.948 | 0.747 | 0.787 | 0.825 | 0.738 |
| 465 | 0.925 | 0.752 | 0.790 | 0.820 | 0.731 |
| 466 | 0.934 | 0.729 | 0.787 | 0.813 | 0.722 |
| 467 | 0.934 | 0.755 | 0.772 | 0.818 | 0.728 |
| 468 | 0.910 | 0.718 | 0.790 | 0.803 | 0.707 |
| 469 | 0.916 | 0.700 | 0.790 | 0.799 | 0.701 |
| 470 | 0.934 | 0.752 | 0.796 | 0.825 | 0.738 |
| 471 | 0.919 | 0.739 | 0.778 | 0.810 | 0.716 |
| 472 | 0.936 | 0.757 | 0.799 | 0.828 | 0.744 |
| 473 | 0.936 | 0.713 | 0.766 | 0.802 | 0.705 |
| 474 | 0.931 | 0.744 | 0.778 | 0.815 | 0.724 |
| 475 | 0.934 | 0.729 | 0.802 | 0.818 | 0.729 |
| 476 | 0.948 | 0.739 | 0.778 | 0.819 | 0.730 |
| 477 | 0.951 | 0.757 | 0.760 | 0.821 | 0.732 |
| 478 | 0.922 | 0.752 | 0.781 | 0.816 | 0.725 |
| 479 | 0.939 | 0.752 | 0.793 | 0.826 | 0.740 |
| 480 | 0.934 | 0.726 | 0.781 | 0.811 | 0.718 |
| 481 | 0.928 | 0.739 | 0.787 | 0.815 | 0.724 |
| 482 | 0.939 | 0.739 | 0.775 | 0.815 | 0.724 |
| 483 | 0.928 | 0.742 | 0.787 | 0.816 | 0.726 |
| 484 | 0.922 | 0.760 | 0.784 | 0.820 | 0.731 |
| 485 | 0.931 | 0.721 | 0.784 | 0.809 | 0.715 |
| 486 | 0.939 | 0.760 | 0.781 | 0.825 | 0.738 |
| 487 | 0.934 | 0.724 | 0.823 | 0.823 | 0.738 |
| 488 | 0.936 | 0.744 | 0.775 | 0.816 | 0.725 |
| 489 | 0.928 | 0.747 | 0.781 | 0.816 | 0.726 |
| 490 | 0.936 | 0.757 | 0.763 | 0.817 | 0.726 |
| 491 | 0.931 | 0.755 | 0.775 | 0.818 | 0.728 |
| 492 | 0.945 | 0.747 | 0.796 | 0.827 | 0.741 |
| 493 | 0.925 | 0.742 | 0.772 | 0.811 | 0.717 |
| 494 | 0.939 | 0.760 | 0.775 | 0.823 | 0.735 |
| 495 | 0.913 | 0.752 | 0.769 | 0.810 | 0.715 |
| 496 | 0.922 | 0.755 | 0.778 | 0.816 | 0.725 |

|     |       |       |       |       |       |
|-----|-------|-------|-------|-------|-------|
| 497 | 0.934 | 0.749 | 0.772 | 0.816 | 0.725 |
| 498 | 0.942 | 0.713 | 0.784 | 0.810 | 0.717 |
| 499 | 0.945 | 0.698 | 0.799 | 0.810 | 0.718 |
| 500 | 0.934 | 0.713 | 0.772 | 0.803 | 0.707 |
| 501 | 0.942 | 0.747 | 0.799 | 0.827 | 0.741 |
| 502 | 0.942 | 0.711 | 0.790 | 0.811 | 0.718 |
| 503 | 0.942 | 0.747 | 0.784 | 0.822 | 0.734 |
| 504 | 0.942 | 0.744 | 0.784 | 0.821 | 0.732 |
| 505 | 0.936 | 0.749 | 0.772 | 0.817 | 0.727 |
| 506 | 0.939 | 0.752 | 0.778 | 0.821 | 0.732 |
| 507 | 0.951 | 0.731 | 0.769 | 0.814 | 0.723 |
| 508 | 0.957 | 0.752 | 0.793 | 0.831 | 0.748 |
| 509 | 0.939 | 0.736 | 0.793 | 0.820 | 0.732 |
| 510 | 0.925 | 0.705 | 0.802 | 0.807 | 0.714 |
| 511 | 0.934 | 0.721 | 0.808 | 0.817 | 0.729 |
| 512 | 0.945 | 0.757 | 0.796 | 0.830 | 0.747 |
| 513 | 0.939 | 0.736 | 0.802 | 0.823 | 0.736 |
| 514 | 0.928 | 0.729 | 0.778 | 0.809 | 0.715 |
| 515 | 0.939 | 0.726 | 0.808 | 0.821 | 0.734 |
| 516 | 0.939 | 0.729 | 0.799 | 0.819 | 0.731 |
| 517 | 0.936 | 0.752 | 0.793 | 0.825 | 0.738 |
| 518 | 0.945 | 0.736 | 0.802 | 0.825 | 0.739 |
| 519 | 0.922 | 0.739 | 0.808 | 0.820 | 0.732 |
| 520 | 0.948 | 0.749 | 0.802 | 0.830 | 0.747 |
| 521 | 0.942 | 0.731 | 0.790 | 0.818 | 0.729 |
| 522 | 0.942 | 0.744 | 0.790 | 0.823 | 0.736 |
| 523 | 0.954 | 0.721 | 0.793 | 0.819 | 0.731 |
| 524 | 0.925 | 0.721 | 0.793 | 0.810 | 0.717 |
| 525 | 0.945 | 0.726 | 0.790 | 0.817 | 0.728 |
| 526 | 0.934 | 0.742 | 0.787 | 0.818 | 0.729 |
| 527 | 0.936 | 0.729 | 0.796 | 0.817 | 0.728 |
| 528 | 0.919 | 0.742 | 0.802 | 0.818 | 0.729 |
| 529 | 0.931 | 0.713 | 0.790 | 0.808 | 0.714 |
| 530 | 0.922 | 0.752 | 0.793 | 0.820 | 0.731 |
| 531 | 0.910 | 0.747 | 0.790 | 0.813 | 0.722 |
| 532 | 0.916 | 0.718 | 0.766 | 0.798 | 0.698 |
| 533 | 0.931 | 0.705 | 0.793 | 0.806 | 0.712 |
| 534 | 0.931 | 0.739 | 0.787 | 0.816 | 0.726 |
| 535 | 0.916 | 0.718 | 0.799 | 0.808 | 0.714 |
| 536 | 0.919 | 0.742 | 0.769 | 0.808 | 0.713 |
| 537 | 0.931 | 0.731 | 0.775 | 0.810 | 0.716 |
| 538 | 0.919 | 0.739 | 0.751 | 0.801 | 0.703 |

|     |       |       |       |       |       |
|-----|-------|-------|-------|-------|-------|
| 539 | 0.916 | 0.711 | 0.799 | 0.805 | 0.711 |
| 540 | 0.928 | 0.718 | 0.787 | 0.808 | 0.714 |
| 541 | 0.922 | 0.742 | 0.775 | 0.811 | 0.717 |
| 542 | 0.925 | 0.736 | 0.799 | 0.817 | 0.728 |
| 543 | 0.922 | 0.731 | 0.793 | 0.813 | 0.721 |
| 544 | 0.910 | 0.713 | 0.784 | 0.799 | 0.702 |
| 545 | 0.916 | 0.693 | 0.775 | 0.791 | 0.690 |
| 546 | 0.913 | 0.726 | 0.778 | 0.803 | 0.707 |
| 547 | 0.931 | 0.734 | 0.746 | 0.801 | 0.702 |
| 548 | 0.910 | 0.690 | 0.796 | 0.795 | 0.696 |
| 549 | 0.936 | 0.724 | 0.772 | 0.808 | 0.713 |
| 550 | 0.919 | 0.708 | 0.787 | 0.801 | 0.705 |
| 551 | 0.931 | 0.757 | 0.772 | 0.818 | 0.728 |
| 552 | 0.925 | 0.731 | 0.784 | 0.811 | 0.718 |
| 553 | 0.910 | 0.705 | 0.802 | 0.802 | 0.707 |
| 554 | 0.925 | 0.713 | 0.784 | 0.804 | 0.709 |
| 555 | 0.919 | 0.731 | 0.781 | 0.808 | 0.714 |
| 556 | 0.908 | 0.721 | 0.778 | 0.799 | 0.701 |
| 557 | 0.922 | 0.747 | 0.760 | 0.808 | 0.713 |
| 558 | 0.919 | 0.744 | 0.737 | 0.799 | 0.698 |
| 559 | 0.919 | 0.736 | 0.760 | 0.803 | 0.706 |
| 560 | 0.916 | 0.762 | 0.754 | 0.810 | 0.715 |
| 561 | 0.925 | 0.695 | 0.778 | 0.796 | 0.697 |
| 562 | 0.925 | 0.739 | 0.740 | 0.799 | 0.700 |
| 563 | 0.928 | 0.744 | 0.751 | 0.806 | 0.710 |
| 564 | 0.936 | 0.726 | 0.781 | 0.812 | 0.719 |
| 565 | 0.908 | 0.739 | 0.784 | 0.808 | 0.714 |
| 566 | 0.925 | 0.739 | 0.775 | 0.811 | 0.717 |
| 567 | 0.922 | 0.752 | 0.760 | 0.810 | 0.715 |
| 568 | 0.931 | 0.755 | 0.787 | 0.822 | 0.734 |
| 569 | 0.908 | 0.726 | 0.766 | 0.798 | 0.698 |
| 570 | 0.925 | 0.734 | 0.769 | 0.807 | 0.712 |
| 571 | 0.916 | 0.711 | 0.766 | 0.795 | 0.695 |
| 572 | 0.934 | 0.739 | 0.757 | 0.808 | 0.713 |
| 573 | 0.928 | 0.734 | 0.751 | 0.802 | 0.704 |
| 574 | 0.893 | 0.705 | 0.772 | 0.787 | 0.684 |
| 575 | 0.925 | 0.734 | 0.757 | 0.803 | 0.706 |
| 576 | 0.925 | 0.721 | 0.737 | 0.792 | 0.689 |
| 577 | 0.919 | 0.739 | 0.781 | 0.811 | 0.718 |
| 578 | 0.922 | 0.708 | 0.778 | 0.799 | 0.702 |
| 579 | 0.931 | 0.705 | 0.781 | 0.802 | 0.706 |
| 580 | 0.936 | 0.739 | 0.760 | 0.810 | 0.715 |

|     |       |       |       |       |       |
|-----|-------|-------|-------|-------|-------|
| 581 | 0.931 | 0.736 | 0.734 | 0.799 | 0.698 |
| 582 | 0.913 | 0.726 | 0.772 | 0.801 | 0.704 |
| 583 | 0.913 | 0.721 | 0.766 | 0.798 | 0.698 |
| 584 | 0.928 | 0.713 | 0.775 | 0.802 | 0.705 |
| 585 | 0.919 | 0.739 | 0.763 | 0.805 | 0.709 |
| 586 | 0.913 | 0.703 | 0.793 | 0.799 | 0.703 |
| 587 | 0.922 | 0.726 | 0.784 | 0.808 | 0.714 |
| 588 | 0.919 | 0.747 | 0.772 | 0.811 | 0.717 |
| 589 | 0.942 | 0.731 | 0.781 | 0.815 | 0.725 |
| 590 | 0.939 | 0.718 | 0.781 | 0.810 | 0.717 |
| 591 | 0.919 | 0.747 | 0.746 | 0.802 | 0.704 |
| 592 | 0.916 | 0.708 | 0.763 | 0.793 | 0.691 |
| 593 | 0.916 | 0.744 | 0.749 | 0.801 | 0.703 |
| 594 | 0.925 | 0.724 | 0.754 | 0.799 | 0.699 |
| 595 | 0.913 | 0.708 | 0.778 | 0.797 | 0.698 |
| 596 | 0.913 | 0.744 | 0.772 | 0.808 | 0.713 |
| 597 | 0.919 | 0.716 | 0.757 | 0.795 | 0.694 |
| 598 | 0.928 | 0.711 | 0.775 | 0.801 | 0.704 |
| 599 | 0.922 | 0.742 | 0.766 | 0.808 | 0.713 |
| 600 | 0.925 | 0.734 | 0.757 | 0.803 | 0.706 |
| 601 | 0.925 | 0.736 | 0.760 | 0.805 | 0.708 |
| 602 | 0.913 | 0.721 | 0.781 | 0.802 | 0.706 |
| 603 | 0.922 | 0.734 | 0.760 | 0.803 | 0.706 |
| 604 | 0.908 | 0.729 | 0.769 | 0.799 | 0.701 |
| 605 | 0.916 | 0.739 | 0.769 | 0.806 | 0.710 |
| 606 | 0.928 | 0.700 | 0.766 | 0.795 | 0.695 |
| 607 | 0.919 | 0.729 | 0.746 | 0.796 | 0.694 |
| 608 | 0.939 | 0.736 | 0.749 | 0.806 | 0.709 |
| 609 | 0.925 | 0.729 | 0.772 | 0.806 | 0.711 |
| 610 | 0.913 | 0.718 | 0.754 | 0.793 | 0.691 |
| 611 | 0.913 | 0.718 | 0.760 | 0.795 | 0.694 |
| 612 | 0.925 | 0.721 | 0.766 | 0.801 | 0.704 |
| 613 | 0.925 | 0.729 | 0.766 | 0.804 | 0.707 |
| 614 | 0.945 | 0.734 | 0.766 | 0.813 | 0.720 |
| 615 | 0.908 | 0.729 | 0.769 | 0.799 | 0.701 |
| 616 | 0.908 | 0.742 | 0.751 | 0.799 | 0.699 |
| 617 | 0.919 | 0.718 | 0.772 | 0.800 | 0.703 |
| 618 | 0.934 | 0.716 | 0.763 | 0.801 | 0.704 |
| 619 | 0.925 | 0.739 | 0.751 | 0.803 | 0.706 |
| 620 | 0.928 | 0.700 | 0.766 | 0.795 | 0.695 |
| 621 | 0.925 | 0.744 | 0.775 | 0.813 | 0.720 |
| 622 | 0.925 | 0.718 | 0.749 | 0.795 | 0.693 |

|     |       |       |       |       |       |
|-----|-------|-------|-------|-------|-------|
| 623 | 0.919 | 0.726 | 0.760 | 0.799 | 0.701 |
| 624 | 0.931 | 0.724 | 0.763 | 0.803 | 0.706 |
| 625 | 0.910 | 0.726 | 0.757 | 0.796 | 0.695 |
| 626 | 0.925 | 0.721 | 0.746 | 0.795 | 0.693 |
| 627 | 0.910 | 0.729 | 0.763 | 0.799 | 0.699 |
| 628 | 0.922 | 0.736 | 0.772 | 0.808 | 0.713 |
| 629 | 0.922 | 0.742 | 0.757 | 0.805 | 0.708 |
| 630 | 0.925 | 0.724 | 0.746 | 0.796 | 0.695 |
| 631 | 0.919 | 0.731 | 0.749 | 0.798 | 0.697 |
| 632 | 0.922 | 0.742 | 0.757 | 0.805 | 0.708 |
| 633 | 0.931 | 0.693 | 0.778 | 0.797 | 0.698 |
| 634 | 0.928 | 0.736 | 0.746 | 0.801 | 0.702 |
| 635 | 0.945 | 0.726 | 0.775 | 0.813 | 0.721 |
| 636 | 0.916 | 0.729 | 0.766 | 0.801 | 0.704 |
| 637 | 0.934 | 0.718 | 0.775 | 0.806 | 0.711 |
| 638 | 0.928 | 0.726 | 0.754 | 0.800 | 0.701 |
| 639 | 0.916 | 0.736 | 0.766 | 0.804 | 0.707 |
| 640 | 0.922 | 0.713 | 0.772 | 0.799 | 0.701 |
| 641 | 0.910 | 0.721 | 0.754 | 0.793 | 0.691 |
| 642 | 0.922 | 0.747 | 0.760 | 0.808 | 0.712 |
| 643 | 0.910 | 0.716 | 0.787 | 0.801 | 0.705 |
| 644 | 0.905 | 0.705 | 0.769 | 0.790 | 0.688 |
| 645 | 0.922 | 0.731 | 0.749 | 0.799 | 0.699 |
| 646 | 0.931 | 0.700 | 0.769 | 0.797 | 0.697 |
| 647 | 0.916 | 0.731 | 0.766 | 0.802 | 0.705 |
| 648 | 0.931 | 0.747 | 0.751 | 0.808 | 0.712 |
| 649 | 0.931 | 0.716 | 0.772 | 0.803 | 0.707 |
| 650 | 0.925 | 0.726 | 0.760 | 0.801 | 0.703 |
| 651 | 0.925 | 0.729 | 0.737 | 0.795 | 0.693 |
| 652 | 0.913 | 0.744 | 0.757 | 0.803 | 0.706 |
| 653 | 0.919 | 0.713 | 0.772 | 0.799 | 0.700 |
| 654 | 0.928 | 0.726 | 0.769 | 0.805 | 0.709 |
| 655 | 0.934 | 0.734 | 0.746 | 0.802 | 0.704 |
| 656 | 0.942 | 0.729 | 0.763 | 0.809 | 0.714 |
| 657 | 0.908 | 0.724 | 0.769 | 0.798 | 0.698 |
| 658 | 0.942 | 0.711 | 0.775 | 0.806 | 0.711 |
| 659 | 0.916 | 0.731 | 0.781 | 0.807 | 0.712 |
| 660 | 0.919 | 0.731 | 0.775 | 0.806 | 0.711 |
| 661 | 0.908 | 0.703 | 0.775 | 0.792 | 0.691 |
| 662 | 0.922 | 0.747 | 0.775 | 0.813 | 0.720 |
| 663 | 0.936 | 0.729 | 0.754 | 0.804 | 0.707 |
| 664 | 0.925 | 0.708 | 0.749 | 0.791 | 0.688 |

|     |       |       |       |       |       |
|-----|-------|-------|-------|-------|-------|
| 665 | 0.919 | 0.724 | 0.760 | 0.799 | 0.699 |
| 666 | 0.934 | 0.718 | 0.769 | 0.804 | 0.708 |
| 667 | 0.899 | 0.742 | 0.746 | 0.794 | 0.692 |
| 668 | 0.931 | 0.739 | 0.769 | 0.811 | 0.717 |
| 669 | 0.928 | 0.734 | 0.754 | 0.803 | 0.706 |
| 670 | 0.936 | 0.734 | 0.751 | 0.805 | 0.708 |
| 671 | 0.916 | 0.742 | 0.757 | 0.803 | 0.705 |
| 672 | 0.925 | 0.742 | 0.763 | 0.808 | 0.713 |
| 673 | 0.925 | 0.718 | 0.784 | 0.806 | 0.711 |
| 674 | 0.925 | 0.744 | 0.778 | 0.813 | 0.721 |
| 675 | 0.931 | 0.731 | 0.754 | 0.803 | 0.706 |
| 676 | 0.908 | 0.716 | 0.763 | 0.793 | 0.691 |
| 677 | 0.913 | 0.729 | 0.757 | 0.798 | 0.698 |
| 678 | 0.925 | 0.708 | 0.772 | 0.799 | 0.700 |
| 679 | 0.928 | 0.734 | 0.757 | 0.804 | 0.707 |
| 680 | 0.931 | 0.742 | 0.763 | 0.810 | 0.715 |
| 681 | 0.936 | 0.721 | 0.772 | 0.807 | 0.712 |
| 682 | 0.922 | 0.721 | 0.775 | 0.803 | 0.707 |
| 683 | 0.934 | 0.726 | 0.763 | 0.805 | 0.709 |
| 684 | 0.919 | 0.742 | 0.760 | 0.805 | 0.708 |
| 685 | 0.934 | 0.752 | 0.769 | 0.816 | 0.725 |
| 686 | 0.925 | 0.739 | 0.737 | 0.799 | 0.698 |
| 687 | 0.936 | 0.729 | 0.763 | 0.807 | 0.712 |
| 688 | 0.925 | 0.716 | 0.751 | 0.795 | 0.694 |
| 689 | 0.919 | 0.729 | 0.740 | 0.794 | 0.692 |
| 690 | 0.934 | 0.731 | 0.763 | 0.807 | 0.712 |
| 691 | 0.936 | 0.703 | 0.751 | 0.794 | 0.692 |
| 692 | 0.922 | 0.742 | 0.766 | 0.808 | 0.713 |
| 693 | 0.942 | 0.729 | 0.772 | 0.812 | 0.719 |
| 694 | 0.925 | 0.729 | 0.763 | 0.803 | 0.706 |
| 695 | 0.928 | 0.739 | 0.760 | 0.807 | 0.711 |
| 696 | 0.931 | 0.749 | 0.746 | 0.807 | 0.711 |
| 697 | 0.928 | 0.752 | 0.719 | 0.799 | 0.697 |
| 698 | 0.934 | 0.724 | 0.778 | 0.809 | 0.715 |
| 699 | 0.913 | 0.721 | 0.754 | 0.794 | 0.692 |
| 700 | 0.913 | 0.736 | 0.778 | 0.807 | 0.712 |
| 701 | 0.916 | 0.734 | 0.781 | 0.808 | 0.714 |
| 702 | 0.908 | 0.757 | 0.743 | 0.801 | 0.702 |
| 703 | 0.928 | 0.731 | 0.772 | 0.808 | 0.713 |
| 704 | 0.936 | 0.718 | 0.772 | 0.806 | 0.711 |
| 705 | 0.928 | 0.749 | 0.743 | 0.805 | 0.708 |
| 706 | 0.910 | 0.736 | 0.760 | 0.800 | 0.702 |

|     |       |       |       |       |       |
|-----|-------|-------|-------|-------|-------|
| 707 | 0.919 | 0.718 | 0.760 | 0.797 | 0.697 |
| 708 | 0.925 | 0.716 | 0.763 | 0.799 | 0.699 |
| 709 | 0.925 | 0.724 | 0.751 | 0.798 | 0.698 |
| 710 | 0.919 | 0.729 | 0.760 | 0.800 | 0.702 |
| 711 | 0.922 | 0.734 | 0.740 | 0.797 | 0.696 |
| 712 | 0.928 | 0.729 | 0.769 | 0.806 | 0.711 |
| 713 | 0.916 | 0.726 | 0.763 | 0.799 | 0.701 |
| 714 | 0.928 | 0.729 | 0.772 | 0.807 | 0.712 |
| 715 | 0.925 | 0.731 | 0.760 | 0.803 | 0.706 |
| 716 | 0.931 | 0.726 | 0.757 | 0.802 | 0.705 |
| 717 | 0.931 | 0.713 | 0.760 | 0.799 | 0.699 |
| 718 | 0.945 | 0.739 | 0.749 | 0.809 | 0.714 |
| 719 | 0.910 | 0.721 | 0.754 | 0.793 | 0.691 |
| 720 | 0.945 | 0.752 | 0.746 | 0.813 | 0.719 |
| 721 | 0.931 | 0.747 | 0.749 | 0.807 | 0.711 |
| 722 | 0.919 | 0.713 | 0.757 | 0.794 | 0.692 |
| 723 | 0.913 | 0.747 | 0.760 | 0.805 | 0.709 |
| 724 | 0.910 | 0.736 | 0.757 | 0.799 | 0.700 |
| 725 | 0.931 | 0.742 | 0.772 | 0.813 | 0.720 |
| 726 | 0.916 | 0.726 | 0.751 | 0.796 | 0.695 |
| 727 | 0.922 | 0.711 | 0.763 | 0.796 | 0.695 |
| 728 | 0.928 | 0.729 | 0.775 | 0.808 | 0.713 |
| 729 | 0.913 | 0.739 | 0.766 | 0.804 | 0.707 |
| 730 | 0.908 | 0.716 | 0.740 | 0.785 | 0.679 |
| 731 | 0.931 | 0.703 | 0.760 | 0.795 | 0.694 |
| 732 | 0.919 | 0.739 | 0.749 | 0.800 | 0.701 |
| 733 | 0.913 | 0.726 | 0.766 | 0.799 | 0.701 |
| 734 | 0.925 | 0.711 | 0.763 | 0.797 | 0.697 |
| 735 | 0.919 | 0.703 | 0.751 | 0.788 | 0.684 |
| 736 | 0.913 | 0.726 | 0.749 | 0.794 | 0.692 |
| 737 | 0.928 | 0.724 | 0.743 | 0.796 | 0.694 |
| 738 | 0.902 | 0.739 | 0.763 | 0.799 | 0.700 |
| 739 | 0.928 | 0.744 | 0.743 | 0.803 | 0.705 |
| 740 | 0.913 | 0.734 | 0.751 | 0.798 | 0.697 |
| 741 | 0.928 | 0.729 | 0.751 | 0.800 | 0.701 |
| 742 | 0.928 | 0.726 | 0.778 | 0.808 | 0.714 |
| 743 | 0.928 | 0.713 | 0.763 | 0.799 | 0.700 |
| 744 | 0.925 | 0.721 | 0.766 | 0.801 | 0.704 |
| 745 | 0.910 | 0.729 | 0.757 | 0.797 | 0.696 |
| 746 | 0.925 | 0.721 | 0.760 | 0.799 | 0.700 |
| 747 | 0.908 | 0.729 | 0.763 | 0.798 | 0.698 |
| 748 | 0.908 | 0.713 | 0.757 | 0.790 | 0.687 |



|     |       |       |       |       |       |
|-----|-------|-------|-------|-------|-------|
| 749 | 0.908 | 0.721 | 0.799 | 0.806 | 0.712 |
| 750 | 0.916 | 0.718 | 0.766 | 0.798 | 0.698 |
| 751 | 0.908 | 0.713 | 0.772 | 0.795 | 0.694 |
| 752 | 0.902 | 0.731 | 0.775 | 0.800 | 0.703 |
| 753 | 0.916 | 0.731 | 0.746 | 0.796 | 0.694 |
| 754 | 0.908 | 0.724 | 0.760 | 0.795 | 0.694 |
| 755 | 0.908 | 0.744 | 0.734 | 0.794 | 0.691 |
| 756 | 0.910 | 0.724 | 0.784 | 0.803 | 0.707 |
| 757 | 0.919 | 0.744 | 0.757 | 0.805 | 0.708 |
| 758 | 0.908 | 0.726 | 0.772 | 0.799 | 0.701 |
| 759 | 0.910 | 0.713 | 0.772 | 0.796 | 0.696 |
| 760 | 0.913 | 0.708 | 0.781 | 0.798 | 0.699 |
| 761 | 0.919 | 0.724 | 0.772 | 0.802 | 0.705 |
| 762 | 0.910 | 0.721 | 0.766 | 0.797 | 0.697 |
| 763 | 0.922 | 0.703 | 0.799 | 0.804 | 0.710 |
| 764 | 0.916 | 0.724 | 0.781 | 0.804 | 0.708 |
| 765 | 0.910 | 0.713 | 0.763 | 0.793 | 0.691 |
| 766 | 0.916 | 0.721 | 0.784 | 0.804 | 0.709 |
| 767 | 0.905 | 0.724 | 0.772 | 0.798 | 0.699 |
| 768 | 0.913 | 0.716 | 0.763 | 0.795 | 0.694 |
| 769 | 0.910 | 0.742 | 0.760 | 0.802 | 0.704 |
| 770 | 0.919 | 0.726 | 0.775 | 0.804 | 0.708 |
| 771 | 0.905 | 0.718 | 0.766 | 0.794 | 0.693 |
| 772 | 0.910 | 0.700 | 0.784 | 0.795 | 0.696 |
| 773 | 0.910 | 0.713 | 0.775 | 0.797 | 0.698 |
| 774 | 0.913 | 0.729 | 0.781 | 0.805 | 0.710 |
| 775 | 0.905 | 0.713 | 0.802 | 0.803 | 0.709 |
| 776 | 0.908 | 0.739 | 0.766 | 0.802 | 0.705 |
| 777 | 0.931 | 0.708 | 0.778 | 0.802 | 0.706 |
| 778 | 0.899 | 0.731 | 0.766 | 0.797 | 0.697 |
| 779 | 0.931 | 0.693 | 0.784 | 0.799 | 0.701 |
| 780 | 0.899 | 0.711 | 0.778 | 0.793 | 0.692 |
| 781 | 0.893 | 0.726 | 0.769 | 0.794 | 0.693 |
| 782 | 0.905 | 0.734 | 0.772 | 0.801 | 0.704 |
| 783 | 0.896 | 0.718 | 0.781 | 0.796 | 0.696 |
| 784 | 0.896 | 0.713 | 0.784 | 0.795 | 0.695 |
| 785 | 0.916 | 0.716 | 0.740 | 0.788 | 0.683 |
| 786 | 0.908 | 0.742 | 0.766 | 0.803 | 0.706 |
| 787 | 0.890 | 0.729 | 0.778 | 0.797 | 0.697 |
| 788 | 0.922 | 0.721 | 0.775 | 0.803 | 0.707 |

(3) Performance of RF on top features yielded by three feature selection methods

|             |
|-------------|
| <b>mRMR</b> |
|-------------|

| <b>Numbers of features</b> | <b>G1</b> | <b>G2/M</b> | <b>S</b> | <b>ACC</b> | <b>MCC</b> |
|----------------------------|-----------|-------------|----------|------------|------------|
| 1                          | 0.908     | 0.636       | 0.611    | 0.716      | 0.575      |
| 2                          | 0.945     | 0.829       | 0.722    | 0.833      | 0.749      |
| 3                          | 0.957     | 0.817       | 0.757    | 0.843      | 0.765      |
| 4                          | 0.954     | 0.855       | 0.740    | 0.851      | 0.776      |
| 5                          | 0.954     | 0.863       | 0.746    | 0.856      | 0.783      |
| 6                          | 0.942     | 0.858       | 0.751    | 0.852      | 0.777      |
| 7                          | 0.948     | 0.858       | 0.772    | 0.860      | 0.790      |
| 8                          | 0.942     | 0.850       | 0.757    | 0.851      | 0.776      |
| 9                          | 0.945     | 0.842       | 0.763    | 0.851      | 0.776      |
| 10                         | 0.951     | 0.840       | 0.743    | 0.845      | 0.768      |
| 11                         | 0.957     | 0.845       | 0.766    | 0.857      | 0.785      |
| 12                         | 0.954     | 0.848       | 0.760    | 0.855      | 0.782      |
| 13                         | 0.951     | 0.863       | 0.746    | 0.855      | 0.782      |
| 14                         | 0.951     | 0.855       | 0.757    | 0.856      | 0.783      |
| 15                         | 0.951     | 0.860       | 0.757    | 0.858      | 0.786      |
| 16                         | 0.951     | 0.858       | 0.769    | 0.860      | 0.790      |
| 17                         | 0.954     | 0.863       | 0.760    | 0.860      | 0.790      |
| 18                         | 0.951     | 0.858       | 0.778    | 0.863      | 0.794      |
| 19                         | 0.948     | 0.863       | 0.766    | 0.860      | 0.790      |
| 20                         | 0.951     | 0.850       | 0.772    | 0.858      | 0.787      |
| 21                         | 0.957     | 0.866       | 0.775    | 0.867      | 0.800      |
| 22                         | 0.945     | 0.863       | 0.778    | 0.863      | 0.794      |
| 23                         | 0.962     | 0.863       | 0.787    | 0.872      | 0.807      |
| 24                         | 0.960     | 0.868       | 0.796    | 0.875      | 0.813      |
| 25                         | 0.960     | 0.876       | 0.784    | 0.874      | 0.811      |
| 26                         | 0.965     | 0.873       | 0.784    | 0.875      | 0.813      |
| 27                         | 0.951     | 0.884       | 0.784    | 0.874      | 0.811      |
| 28                         | 0.960     | 0.879       | 0.778    | 0.873      | 0.810      |
| 29                         | 0.951     | 0.863       | 0.784    | 0.867      | 0.800      |
| 30                         | 0.968     | 0.866       | 0.796    | 0.877      | 0.816      |
| 31                         | 0.962     | 0.868       | 0.805    | 0.879      | 0.818      |
| 32                         | 0.971     | 0.871       | 0.799    | 0.881      | 0.821      |
| 33                         | 0.962     | 0.876       | 0.805    | 0.882      | 0.823      |
| 34                         | 0.957     | 0.866       | 0.802    | 0.875      | 0.813      |
| 35                         | 0.968     | 0.873       | 0.814    | 0.886      | 0.828      |
| 36                         | 0.965     | 0.881       | 0.799    | 0.883      | 0.824      |
| 37                         | 0.965     | 0.894       | 0.796    | 0.887      | 0.830      |
| 38                         | 0.965     | 0.886       | 0.787    | 0.881      | 0.821      |
| 39                         | 0.974     | 0.881       | 0.808    | 0.888      | 0.832      |
| 40                         | 0.962     | 0.889       | 0.802    | 0.886      | 0.828      |
| 41                         | 0.957     | 0.886       | 0.802    | 0.883      | 0.824      |

|    |       |       |       |       |       |
|----|-------|-------|-------|-------|-------|
| 42 | 0.974 | 0.881 | 0.796 | 0.885 | 0.827 |
| 43 | 0.965 | 0.886 | 0.796 | 0.884 | 0.826 |
| 44 | 0.965 | 0.886 | 0.790 | 0.882 | 0.823 |
| 45 | 0.962 | 0.881 | 0.805 | 0.884 | 0.825 |
| 46 | 0.968 | 0.886 | 0.799 | 0.886 | 0.828 |
| 47 | 0.960 | 0.886 | 0.811 | 0.887 | 0.830 |
| 48 | 0.968 | 0.876 | 0.817 | 0.888 | 0.831 |
| 49 | 0.957 | 0.886 | 0.793 | 0.880 | 0.820 |
| 50 | 0.962 | 0.891 | 0.802 | 0.887 | 0.830 |
| 51 | 0.960 | 0.879 | 0.817 | 0.886 | 0.828 |
| 52 | 0.965 | 0.881 | 0.805 | 0.885 | 0.827 |
| 53 | 0.965 | 0.899 | 0.811 | 0.893 | 0.840 |
| 54 | 0.960 | 0.889 | 0.802 | 0.885 | 0.827 |
| 55 | 0.960 | 0.891 | 0.814 | 0.889 | 0.834 |
| 56 | 0.957 | 0.891 | 0.814 | 0.888 | 0.832 |
| 57 | 0.960 | 0.894 | 0.817 | 0.891 | 0.837 |
| 58 | 0.960 | 0.886 | 0.820 | 0.889 | 0.834 |
| 59 | 0.962 | 0.894 | 0.823 | 0.894 | 0.841 |
| 60 | 0.965 | 0.904 | 0.808 | 0.894 | 0.841 |
| 61 | 0.957 | 0.902 | 0.820 | 0.894 | 0.841 |
| 62 | 0.965 | 0.899 | 0.823 | 0.897 | 0.845 |
| 63 | 0.965 | 0.881 | 0.832 | 0.893 | 0.839 |
| 64 | 0.965 | 0.902 | 0.823 | 0.898 | 0.847 |
| 65 | 0.968 | 0.894 | 0.832 | 0.899 | 0.848 |
| 66 | 0.960 | 0.886 | 0.817 | 0.888 | 0.832 |
| 67 | 0.971 | 0.894 | 0.814 | 0.894 | 0.841 |
| 68 | 0.968 | 0.907 | 0.817 | 0.899 | 0.848 |
| 69 | 0.977 | 0.897 | 0.814 | 0.897 | 0.845 |
| 70 | 0.971 | 0.891 | 0.820 | 0.895 | 0.842 |
| 71 | 0.974 | 0.904 | 0.817 | 0.900 | 0.849 |
| 72 | 0.968 | 0.899 | 0.829 | 0.900 | 0.849 |
| 73 | 0.965 | 0.904 | 0.817 | 0.897 | 0.845 |
| 74 | 0.968 | 0.904 | 0.823 | 0.900 | 0.849 |
| 75 | 0.971 | 0.889 | 0.811 | 0.891 | 0.837 |
| 76 | 0.962 | 0.899 | 0.811 | 0.892 | 0.838 |
| 77 | 0.965 | 0.894 | 0.805 | 0.889 | 0.834 |
| 78 | 0.974 | 0.891 | 0.826 | 0.898 | 0.847 |
| 79 | 0.971 | 0.894 | 0.826 | 0.898 | 0.847 |
| 80 | 0.962 | 0.904 | 0.823 | 0.898 | 0.847 |
| 81 | 0.968 | 0.897 | 0.823 | 0.897 | 0.845 |
| 82 | 0.968 | 0.894 | 0.826 | 0.897 | 0.845 |
| 83 | 0.971 | 0.891 | 0.817 | 0.894 | 0.841 |

|     |       |       |       |       |       |
|-----|-------|-------|-------|-------|-------|
| 84  | 0.965 | 0.891 | 0.820 | 0.893 | 0.839 |
| 85  | 0.962 | 0.894 | 0.823 | 0.894 | 0.841 |
| 86  | 0.965 | 0.894 | 0.826 | 0.896 | 0.844 |
| 87  | 0.968 | 0.902 | 0.823 | 0.899 | 0.848 |
| 88  | 0.974 | 0.899 | 0.826 | 0.901 | 0.851 |
| 89  | 0.965 | 0.899 | 0.829 | 0.899 | 0.848 |
| 90  | 0.962 | 0.889 | 0.826 | 0.893 | 0.839 |
| 91  | 0.974 | 0.889 | 0.814 | 0.893 | 0.840 |
| 92  | 0.968 | 0.899 | 0.832 | 0.901 | 0.851 |
| 93  | 0.974 | 0.897 | 0.832 | 0.902 | 0.852 |
| 94  | 0.971 | 0.894 | 0.838 | 0.902 | 0.852 |
| 95  | 0.974 | 0.894 | 0.808 | 0.893 | 0.840 |
| 96  | 0.965 | 0.904 | 0.832 | 0.902 | 0.852 |
| 97  | 0.977 | 0.891 | 0.826 | 0.899 | 0.848 |
| 98  | 0.965 | 0.891 | 0.823 | 0.894 | 0.841 |
| 99  | 0.957 | 0.897 | 0.817 | 0.891 | 0.837 |
| 100 | 0.962 | 0.894 | 0.817 | 0.892 | 0.838 |
| 101 | 0.965 | 0.897 | 0.823 | 0.896 | 0.844 |
| 102 | 0.965 | 0.891 | 0.805 | 0.888 | 0.833 |
| 103 | 0.968 | 0.897 | 0.820 | 0.896 | 0.844 |
| 104 | 0.968 | 0.891 | 0.832 | 0.898 | 0.847 |
| 105 | 0.962 | 0.891 | 0.826 | 0.894 | 0.841 |
| 106 | 0.965 | 0.891 | 0.811 | 0.890 | 0.835 |
| 107 | 0.968 | 0.902 | 0.832 | 0.902 | 0.852 |
| 108 | 0.968 | 0.889 | 0.829 | 0.896 | 0.844 |
| 109 | 0.962 | 0.897 | 0.817 | 0.893 | 0.840 |
| 110 | 0.971 | 0.886 | 0.823 | 0.894 | 0.841 |
| 111 | 0.971 | 0.891 | 0.823 | 0.896 | 0.844 |
| 112 | 0.962 | 0.899 | 0.835 | 0.900 | 0.849 |
| 113 | 0.971 | 0.894 | 0.826 | 0.898 | 0.847 |
| 114 | 0.957 | 0.894 | 0.805 | 0.887 | 0.830 |
| 115 | 0.968 | 0.889 | 0.844 | 0.901 | 0.851 |
| 116 | 0.960 | 0.889 | 0.814 | 0.888 | 0.832 |
| 117 | 0.965 | 0.873 | 0.832 | 0.890 | 0.835 |
| 118 | 0.968 | 0.884 | 0.835 | 0.896 | 0.844 |
| 119 | 0.960 | 0.884 | 0.820 | 0.888 | 0.832 |
| 120 | 0.965 | 0.904 | 0.841 | 0.904 | 0.856 |
| 121 | 0.968 | 0.899 | 0.829 | 0.900 | 0.849 |
| 122 | 0.960 | 0.897 | 0.832 | 0.897 | 0.845 |
| 123 | 0.962 | 0.889 | 0.820 | 0.891 | 0.837 |
| 124 | 0.974 | 0.899 | 0.823 | 0.900 | 0.849 |
| 125 | 0.962 | 0.891 | 0.823 | 0.893 | 0.839 |

|     |       |       |       |       |       |
|-----|-------|-------|-------|-------|-------|
| 126 | 0.965 | 0.897 | 0.829 | 0.898 | 0.847 |
| 127 | 0.965 | 0.899 | 0.832 | 0.900 | 0.849 |
| 128 | 0.960 | 0.899 | 0.832 | 0.898 | 0.847 |
| 129 | 0.957 | 0.889 | 0.829 | 0.892 | 0.838 |
| 130 | 0.960 | 0.894 | 0.841 | 0.899 | 0.848 |
| 131 | 0.965 | 0.894 | 0.829 | 0.897 | 0.845 |
| 132 | 0.965 | 0.889 | 0.820 | 0.892 | 0.838 |
| 133 | 0.968 | 0.881 | 0.832 | 0.894 | 0.841 |
| 134 | 0.962 | 0.884 | 0.817 | 0.888 | 0.832 |
| 135 | 0.962 | 0.889 | 0.838 | 0.897 | 0.845 |
| 136 | 0.960 | 0.889 | 0.829 | 0.893 | 0.839 |
| 137 | 0.971 | 0.881 | 0.820 | 0.891 | 0.837 |
| 138 | 0.962 | 0.891 | 0.814 | 0.890 | 0.835 |
| 139 | 0.965 | 0.894 | 0.829 | 0.897 | 0.845 |
| 140 | 0.965 | 0.891 | 0.823 | 0.894 | 0.841 |
| 141 | 0.971 | 0.884 | 0.826 | 0.894 | 0.841 |
| 142 | 0.965 | 0.886 | 0.826 | 0.893 | 0.839 |
| 143 | 0.962 | 0.886 | 0.838 | 0.896 | 0.844 |
| 144 | 0.965 | 0.894 | 0.823 | 0.895 | 0.842 |
| 145 | 0.960 | 0.884 | 0.796 | 0.881 | 0.821 |
| 146 | 0.968 | 0.902 | 0.805 | 0.893 | 0.840 |
| 147 | 0.962 | 0.884 | 0.820 | 0.889 | 0.834 |
| 148 | 0.962 | 0.886 | 0.820 | 0.890 | 0.835 |
| 149 | 0.960 | 0.891 | 0.814 | 0.889 | 0.834 |
| 150 | 0.974 | 0.897 | 0.811 | 0.895 | 0.843 |
| 151 | 0.965 | 0.884 | 0.802 | 0.885 | 0.827 |
| 152 | 0.971 | 0.886 | 0.817 | 0.892 | 0.838 |
| 153 | 0.957 | 0.891 | 0.814 | 0.888 | 0.832 |
| 154 | 0.968 | 0.894 | 0.817 | 0.894 | 0.841 |
| 155 | 0.965 | 0.897 | 0.832 | 0.899 | 0.848 |
| 156 | 0.960 | 0.886 | 0.817 | 0.888 | 0.832 |
| 157 | 0.960 | 0.889 | 0.823 | 0.891 | 0.837 |
| 158 | 0.962 | 0.902 | 0.817 | 0.895 | 0.842 |
| 159 | 0.962 | 0.894 | 0.799 | 0.887 | 0.830 |
| 160 | 0.965 | 0.876 | 0.823 | 0.888 | 0.832 |
| 161 | 0.971 | 0.891 | 0.820 | 0.895 | 0.842 |
| 162 | 0.965 | 0.891 | 0.820 | 0.893 | 0.839 |
| 163 | 0.971 | 0.889 | 0.826 | 0.896 | 0.844 |
| 164 | 0.977 | 0.886 | 0.817 | 0.894 | 0.841 |
| 165 | 0.968 | 0.876 | 0.826 | 0.890 | 0.835 |
| 166 | 0.971 | 0.873 | 0.820 | 0.888 | 0.832 |
| 167 | 0.968 | 0.891 | 0.826 | 0.896 | 0.844 |

|     |       |       |       |       |       |
|-----|-------|-------|-------|-------|-------|
| 168 | 0.977 | 0.897 | 0.823 | 0.900 | 0.849 |
| 169 | 0.962 | 0.897 | 0.820 | 0.894 | 0.841 |
| 170 | 0.962 | 0.889 | 0.826 | 0.893 | 0.839 |
| 171 | 0.965 | 0.879 | 0.826 | 0.890 | 0.835 |
| 172 | 0.965 | 0.897 | 0.823 | 0.896 | 0.844 |
| 173 | 0.974 | 0.897 | 0.835 | 0.903 | 0.854 |
| 174 | 0.971 | 0.884 | 0.826 | 0.894 | 0.841 |
| 175 | 0.965 | 0.894 | 0.808 | 0.890 | 0.835 |
| 176 | 0.971 | 0.894 | 0.805 | 0.891 | 0.837 |
| 177 | 0.968 | 0.894 | 0.826 | 0.897 | 0.845 |
| 178 | 0.968 | 0.894 | 0.826 | 0.897 | 0.845 |
| 179 | 0.960 | 0.889 | 0.838 | 0.896 | 0.844 |
| 180 | 0.960 | 0.894 | 0.832 | 0.896 | 0.844 |
| 181 | 0.965 | 0.889 | 0.826 | 0.894 | 0.841 |
| 182 | 0.962 | 0.879 | 0.835 | 0.892 | 0.838 |
| 183 | 0.977 | 0.886 | 0.835 | 0.900 | 0.849 |
| 184 | 0.962 | 0.884 | 0.823 | 0.890 | 0.835 |
| 185 | 0.962 | 0.886 | 0.823 | 0.891 | 0.837 |
| 186 | 0.965 | 0.884 | 0.829 | 0.893 | 0.839 |
| 187 | 0.968 | 0.897 | 0.814 | 0.894 | 0.841 |
| 188 | 0.971 | 0.889 | 0.829 | 0.897 | 0.845 |
| 189 | 0.957 | 0.879 | 0.826 | 0.888 | 0.831 |
| 190 | 0.962 | 0.884 | 0.826 | 0.891 | 0.837 |
| 191 | 0.971 | 0.889 | 0.838 | 0.900 | 0.849 |
| 192 | 0.968 | 0.891 | 0.841 | 0.901 | 0.851 |
| 193 | 0.965 | 0.897 | 0.817 | 0.894 | 0.841 |
| 194 | 0.974 | 0.894 | 0.835 | 0.902 | 0.852 |
| 195 | 0.971 | 0.897 | 0.850 | 0.906 | 0.859 |
| 196 | 0.971 | 0.881 | 0.820 | 0.891 | 0.837 |
| 197 | 0.968 | 0.884 | 0.832 | 0.895 | 0.842 |
| 198 | 0.965 | 0.884 | 0.823 | 0.891 | 0.837 |
| 199 | 0.971 | 0.886 | 0.835 | 0.898 | 0.846 |
| 200 | 0.962 | 0.879 | 0.838 | 0.893 | 0.839 |
| 201 | 0.968 | 0.884 | 0.832 | 0.895 | 0.842 |
| 202 | 0.977 | 0.886 | 0.838 | 0.901 | 0.851 |
| 203 | 0.960 | 0.886 | 0.829 | 0.892 | 0.838 |
| 204 | 0.965 | 0.876 | 0.826 | 0.889 | 0.834 |
| 205 | 0.962 | 0.881 | 0.829 | 0.891 | 0.837 |
| 206 | 0.962 | 0.884 | 0.817 | 0.888 | 0.832 |
| 207 | 0.968 | 0.884 | 0.838 | 0.897 | 0.845 |
| 208 | 0.965 | 0.889 | 0.835 | 0.897 | 0.845 |
| 209 | 0.962 | 0.889 | 0.823 | 0.892 | 0.838 |

|     |       |       |       |       |       |
|-----|-------|-------|-------|-------|-------|
| 210 | 0.965 | 0.886 | 0.832 | 0.895 | 0.842 |
| 211 | 0.968 | 0.884 | 0.829 | 0.894 | 0.841 |
| 212 | 0.971 | 0.894 | 0.826 | 0.898 | 0.847 |
| 213 | 0.974 | 0.889 | 0.838 | 0.901 | 0.851 |
| 214 | 0.962 | 0.889 | 0.823 | 0.892 | 0.838 |
| 215 | 0.968 | 0.884 | 0.826 | 0.893 | 0.839 |
| 216 | 0.968 | 0.884 | 0.820 | 0.891 | 0.837 |
| 217 | 0.957 | 0.894 | 0.823 | 0.892 | 0.838 |
| 218 | 0.968 | 0.886 | 0.844 | 0.900 | 0.849 |
| 219 | 0.965 | 0.879 | 0.811 | 0.886 | 0.828 |
| 220 | 0.960 | 0.876 | 0.835 | 0.890 | 0.835 |
| 221 | 0.965 | 0.884 | 0.835 | 0.895 | 0.842 |
| 222 | 0.971 | 0.881 | 0.823 | 0.892 | 0.838 |
| 223 | 0.965 | 0.876 | 0.826 | 0.889 | 0.834 |
| 224 | 0.962 | 0.894 | 0.832 | 0.897 | 0.845 |
| 225 | 0.962 | 0.884 | 0.829 | 0.892 | 0.838 |
| 226 | 0.960 | 0.881 | 0.820 | 0.888 | 0.831 |
| 227 | 0.962 | 0.879 | 0.823 | 0.888 | 0.832 |
| 228 | 0.962 | 0.876 | 0.835 | 0.891 | 0.837 |
| 229 | 0.960 | 0.886 | 0.832 | 0.893 | 0.839 |
| 230 | 0.962 | 0.889 | 0.829 | 0.894 | 0.841 |
| 231 | 0.971 | 0.889 | 0.823 | 0.895 | 0.842 |
| 232 | 0.968 | 0.881 | 0.820 | 0.890 | 0.835 |
| 233 | 0.968 | 0.884 | 0.826 | 0.893 | 0.839 |
| 234 | 0.962 | 0.886 | 0.826 | 0.892 | 0.838 |
| 235 | 0.962 | 0.881 | 0.835 | 0.893 | 0.839 |
| 236 | 0.965 | 0.873 | 0.835 | 0.891 | 0.837 |
| 237 | 0.965 | 0.886 | 0.820 | 0.891 | 0.837 |
| 238 | 0.971 | 0.886 | 0.835 | 0.898 | 0.847 |
| 239 | 0.968 | 0.884 | 0.832 | 0.895 | 0.842 |
| 240 | 0.971 | 0.884 | 0.838 | 0.898 | 0.846 |
| 241 | 0.962 | 0.894 | 0.835 | 0.898 | 0.846 |
| 242 | 0.968 | 0.886 | 0.820 | 0.892 | 0.838 |
| 243 | 0.971 | 0.897 | 0.826 | 0.899 | 0.848 |
| 244 | 0.968 | 0.897 | 0.835 | 0.901 | 0.851 |
| 245 | 0.968 | 0.884 | 0.829 | 0.894 | 0.841 |
| 246 | 0.971 | 0.884 | 0.826 | 0.894 | 0.841 |
| 247 | 0.960 | 0.873 | 0.823 | 0.886 | 0.828 |
| 248 | 0.965 | 0.884 | 0.832 | 0.894 | 0.841 |
| 249 | 0.968 | 0.886 | 0.829 | 0.895 | 0.842 |
| 250 | 0.974 | 0.876 | 0.829 | 0.893 | 0.839 |
| 251 | 0.962 | 0.884 | 0.847 | 0.898 | 0.846 |

|     |       |       |       |       |       |
|-----|-------|-------|-------|-------|-------|
| 252 | 0.971 | 0.897 | 0.844 | 0.904 | 0.856 |
| 253 | 0.971 | 0.881 | 0.850 | 0.901 | 0.851 |
| 254 | 0.962 | 0.884 | 0.835 | 0.894 | 0.841 |
| 255 | 0.968 | 0.884 | 0.835 | 0.896 | 0.844 |
| 256 | 0.965 | 0.881 | 0.829 | 0.892 | 0.838 |
| 257 | 0.965 | 0.855 | 0.850 | 0.889 | 0.834 |
| 258 | 0.965 | 0.879 | 0.838 | 0.894 | 0.841 |
| 259 | 0.971 | 0.886 | 0.823 | 0.894 | 0.841 |
| 260 | 0.971 | 0.873 | 0.838 | 0.894 | 0.841 |
| 261 | 0.968 | 0.879 | 0.823 | 0.890 | 0.835 |
| 262 | 0.965 | 0.881 | 0.838 | 0.895 | 0.842 |
| 263 | 0.960 | 0.881 | 0.838 | 0.893 | 0.839 |
| 264 | 0.971 | 0.881 | 0.838 | 0.897 | 0.845 |
| 265 | 0.965 | 0.889 | 0.838 | 0.898 | 0.846 |
| 266 | 0.957 | 0.876 | 0.820 | 0.885 | 0.827 |
| 267 | 0.968 | 0.891 | 0.838 | 0.900 | 0.849 |
| 268 | 0.962 | 0.876 | 0.829 | 0.889 | 0.834 |
| 269 | 0.968 | 0.889 | 0.829 | 0.896 | 0.844 |
| 270 | 0.962 | 0.897 | 0.829 | 0.897 | 0.845 |
| 271 | 0.965 | 0.876 | 0.838 | 0.893 | 0.839 |
| 272 | 0.968 | 0.879 | 0.838 | 0.895 | 0.842 |
| 273 | 0.965 | 0.886 | 0.829 | 0.894 | 0.841 |
| 274 | 0.968 | 0.881 | 0.838 | 0.896 | 0.844 |
| 275 | 0.977 | 0.889 | 0.820 | 0.896 | 0.844 |
| 276 | 0.968 | 0.886 | 0.829 | 0.895 | 0.842 |
| 277 | 0.968 | 0.881 | 0.826 | 0.892 | 0.838 |
| 278 | 0.968 | 0.881 | 0.838 | 0.896 | 0.844 |
| 279 | 0.965 | 0.884 | 0.826 | 0.892 | 0.838 |
| 280 | 0.968 | 0.886 | 0.817 | 0.891 | 0.837 |
| 281 | 0.965 | 0.889 | 0.838 | 0.898 | 0.846 |
| 282 | 0.962 | 0.886 | 0.838 | 0.896 | 0.844 |
| 283 | 0.965 | 0.886 | 0.832 | 0.895 | 0.842 |
| 284 | 0.965 | 0.881 | 0.829 | 0.892 | 0.838 |
| 285 | 0.962 | 0.889 | 0.829 | 0.894 | 0.841 |
| 286 | 0.974 | 0.876 | 0.841 | 0.897 | 0.845 |
| 287 | 0.960 | 0.876 | 0.838 | 0.891 | 0.837 |
| 288 | 0.960 | 0.886 | 0.823 | 0.890 | 0.835 |
| 289 | 0.968 | 0.889 | 0.823 | 0.894 | 0.841 |
| 290 | 0.968 | 0.891 | 0.829 | 0.897 | 0.845 |
| 291 | 0.965 | 0.884 | 0.826 | 0.892 | 0.838 |
| 292 | 0.965 | 0.899 | 0.838 | 0.902 | 0.852 |
| 293 | 0.968 | 0.884 | 0.823 | 0.892 | 0.838 |



|     |       |       |       |       |       |
|-----|-------|-------|-------|-------|-------|
| 294 | 0.974 | 0.879 | 0.829 | 0.894 | 0.841 |
| 295 | 0.957 | 0.886 | 0.838 | 0.894 | 0.841 |
| 296 | 0.962 | 0.873 | 0.832 | 0.889 | 0.834 |
| 297 | 0.965 | 0.881 | 0.841 | 0.896 | 0.844 |
| 298 | 0.957 | 0.891 | 0.838 | 0.896 | 0.844 |
| 299 | 0.965 | 0.881 | 0.850 | 0.899 | 0.848 |
| 300 | 0.962 | 0.881 | 0.829 | 0.891 | 0.837 |
| 301 | 0.974 | 0.873 | 0.835 | 0.894 | 0.841 |
| 302 | 0.962 | 0.879 | 0.838 | 0.893 | 0.839 |
| 303 | 0.957 | 0.876 | 0.832 | 0.888 | 0.832 |
| 304 | 0.962 | 0.879 | 0.832 | 0.891 | 0.837 |
| 305 | 0.968 | 0.858 | 0.826 | 0.884 | 0.825 |
| 306 | 0.974 | 0.868 | 0.838 | 0.893 | 0.840 |
| 307 | 0.971 | 0.871 | 0.832 | 0.891 | 0.837 |
| 308 | 0.962 | 0.884 | 0.847 | 0.898 | 0.846 |
| 309 | 0.968 | 0.881 | 0.826 | 0.892 | 0.838 |
| 310 | 0.965 | 0.891 | 0.835 | 0.898 | 0.846 |
| 311 | 0.968 | 0.871 | 0.844 | 0.894 | 0.841 |
| 312 | 0.962 | 0.879 | 0.850 | 0.897 | 0.845 |
| 313 | 0.954 | 0.891 | 0.844 | 0.897 | 0.845 |
| 314 | 0.968 | 0.879 | 0.838 | 0.895 | 0.842 |
| 315 | 0.960 | 0.871 | 0.847 | 0.892 | 0.838 |
| 316 | 0.962 | 0.881 | 0.841 | 0.895 | 0.842 |
| 317 | 0.962 | 0.889 | 0.838 | 0.897 | 0.845 |
| 318 | 0.968 | 0.873 | 0.841 | 0.894 | 0.841 |
| 319 | 0.968 | 0.871 | 0.850 | 0.896 | 0.844 |
| 320 | 0.968 | 0.879 | 0.841 | 0.896 | 0.844 |
| 321 | 0.965 | 0.879 | 0.844 | 0.896 | 0.844 |
| 322 | 0.962 | 0.886 | 0.835 | 0.895 | 0.842 |
| 323 | 0.965 | 0.889 | 0.841 | 0.899 | 0.848 |
| 324 | 0.965 | 0.876 | 0.841 | 0.894 | 0.841 |
| 325 | 0.962 | 0.881 | 0.832 | 0.892 | 0.838 |
| 326 | 0.960 | 0.881 | 0.835 | 0.892 | 0.838 |
| 327 | 0.968 | 0.884 | 0.826 | 0.893 | 0.839 |
| 328 | 0.960 | 0.886 | 0.829 | 0.892 | 0.838 |
| 329 | 0.965 | 0.879 | 0.847 | 0.897 | 0.845 |
| 330 | 0.960 | 0.873 | 0.832 | 0.888 | 0.832 |
| 331 | 0.954 | 0.884 | 0.835 | 0.891 | 0.837 |
| 332 | 0.960 | 0.871 | 0.838 | 0.889 | 0.834 |
| 333 | 0.960 | 0.881 | 0.832 | 0.891 | 0.837 |
| 334 | 0.968 | 0.884 | 0.844 | 0.899 | 0.848 |
| 335 | 0.965 | 0.881 | 0.832 | 0.893 | 0.839 |

|     |       |       |       |       |       |
|-----|-------|-------|-------|-------|-------|
| 336 | 0.971 | 0.879 | 0.823 | 0.891 | 0.837 |
| 337 | 0.951 | 0.873 | 0.844 | 0.889 | 0.834 |
| 338 | 0.965 | 0.894 | 0.832 | 0.898 | 0.846 |
| 339 | 0.965 | 0.886 | 0.826 | 0.893 | 0.839 |
| 340 | 0.962 | 0.889 | 0.826 | 0.893 | 0.839 |
| 341 | 0.962 | 0.889 | 0.847 | 0.900 | 0.849 |
| 342 | 0.960 | 0.891 | 0.826 | 0.893 | 0.839 |
| 343 | 0.968 | 0.876 | 0.835 | 0.893 | 0.839 |
| 344 | 0.971 | 0.876 | 0.844 | 0.897 | 0.845 |
| 345 | 0.962 | 0.871 | 0.835 | 0.889 | 0.834 |
| 346 | 0.957 | 0.873 | 0.838 | 0.889 | 0.834 |
| 347 | 0.962 | 0.879 | 0.838 | 0.893 | 0.839 |
| 348 | 0.957 | 0.866 | 0.838 | 0.887 | 0.830 |
| 349 | 0.965 | 0.884 | 0.838 | 0.896 | 0.844 |
| 350 | 0.957 | 0.871 | 0.835 | 0.888 | 0.831 |
| 351 | 0.960 | 0.879 | 0.835 | 0.891 | 0.837 |
| 352 | 0.957 | 0.868 | 0.817 | 0.881 | 0.821 |
| 353 | 0.977 | 0.886 | 0.823 | 0.896 | 0.844 |
| 354 | 0.968 | 0.879 | 0.832 | 0.893 | 0.839 |
| 355 | 0.960 | 0.868 | 0.832 | 0.887 | 0.830 |
| 356 | 0.962 | 0.889 | 0.838 | 0.897 | 0.845 |
| 357 | 0.971 | 0.884 | 0.832 | 0.896 | 0.844 |
| 358 | 0.962 | 0.873 | 0.838 | 0.891 | 0.837 |
| 359 | 0.962 | 0.871 | 0.838 | 0.890 | 0.835 |
| 360 | 0.960 | 0.868 | 0.823 | 0.884 | 0.825 |
| 361 | 0.962 | 0.881 | 0.826 | 0.890 | 0.835 |
| 362 | 0.968 | 0.876 | 0.832 | 0.892 | 0.838 |
| 363 | 0.977 | 0.889 | 0.844 | 0.903 | 0.855 |
| 364 | 0.971 | 0.881 | 0.844 | 0.899 | 0.848 |
| 365 | 0.965 | 0.871 | 0.850 | 0.895 | 0.842 |
| 366 | 0.965 | 0.879 | 0.823 | 0.889 | 0.834 |
| 367 | 0.962 | 0.886 | 0.850 | 0.900 | 0.849 |
| 368 | 0.965 | 0.881 | 0.841 | 0.896 | 0.844 |
| 369 | 0.965 | 0.881 | 0.838 | 0.895 | 0.842 |
| 370 | 0.965 | 0.879 | 0.823 | 0.889 | 0.834 |
| 371 | 0.965 | 0.873 | 0.841 | 0.893 | 0.839 |
| 372 | 0.965 | 0.873 | 0.853 | 0.897 | 0.845 |
| 373 | 0.962 | 0.886 | 0.832 | 0.894 | 0.841 |
| 374 | 0.962 | 0.886 | 0.826 | 0.892 | 0.838 |
| 375 | 0.957 | 0.876 | 0.838 | 0.890 | 0.835 |
| 376 | 0.968 | 0.868 | 0.844 | 0.893 | 0.839 |
| 377 | 0.965 | 0.881 | 0.847 | 0.898 | 0.846 |

|     |       |       |       |       |       |
|-----|-------|-------|-------|-------|-------|
| 378 | 0.968 | 0.873 | 0.841 | 0.894 | 0.841 |
| 379 | 0.974 | 0.873 | 0.847 | 0.898 | 0.847 |
| 380 | 0.974 | 0.879 | 0.850 | 0.901 | 0.851 |
| 381 | 0.965 | 0.873 | 0.847 | 0.895 | 0.842 |
| 382 | 0.957 | 0.884 | 0.838 | 0.893 | 0.839 |
| 383 | 0.968 | 0.884 | 0.829 | 0.894 | 0.841 |
| 384 | 0.962 | 0.876 | 0.832 | 0.890 | 0.835 |
| 385 | 0.960 | 0.876 | 0.847 | 0.894 | 0.841 |
| 386 | 0.962 | 0.876 | 0.844 | 0.894 | 0.841 |
| 387 | 0.957 | 0.876 | 0.832 | 0.888 | 0.832 |
| 388 | 0.968 | 0.860 | 0.838 | 0.888 | 0.832 |
| 389 | 0.971 | 0.871 | 0.844 | 0.895 | 0.842 |
| 390 | 0.965 | 0.884 | 0.841 | 0.897 | 0.845 |
| 391 | 0.968 | 0.879 | 0.844 | 0.897 | 0.845 |
| 392 | 0.974 | 0.876 | 0.835 | 0.895 | 0.842 |
| 393 | 0.971 | 0.868 | 0.838 | 0.892 | 0.838 |
| 394 | 0.962 | 0.884 | 0.838 | 0.895 | 0.842 |
| 395 | 0.971 | 0.873 | 0.841 | 0.895 | 0.842 |
| 396 | 0.957 | 0.881 | 0.841 | 0.893 | 0.839 |
| 397 | 0.962 | 0.884 | 0.853 | 0.900 | 0.849 |
| 398 | 0.965 | 0.876 | 0.832 | 0.891 | 0.837 |
| 399 | 0.962 | 0.879 | 0.829 | 0.890 | 0.835 |
| 400 | 0.968 | 0.891 | 0.850 | 0.903 | 0.855 |
| 401 | 0.957 | 0.863 | 0.844 | 0.888 | 0.831 |
| 402 | 0.962 | 0.889 | 0.835 | 0.896 | 0.844 |
| 403 | 0.968 | 0.876 | 0.844 | 0.896 | 0.844 |
| 404 | 0.971 | 0.881 | 0.838 | 0.897 | 0.845 |
| 405 | 0.960 | 0.879 | 0.847 | 0.895 | 0.842 |
| 406 | 0.957 | 0.881 | 0.850 | 0.896 | 0.844 |
| 407 | 0.960 | 0.884 | 0.844 | 0.896 | 0.844 |
| 408 | 0.962 | 0.873 | 0.838 | 0.891 | 0.837 |
| 409 | 0.968 | 0.876 | 0.844 | 0.896 | 0.844 |
| 410 | 0.957 | 0.873 | 0.847 | 0.892 | 0.838 |
| 411 | 0.960 | 0.879 | 0.844 | 0.894 | 0.841 |
| 412 | 0.962 | 0.884 | 0.847 | 0.898 | 0.846 |
| 413 | 0.962 | 0.886 | 0.850 | 0.900 | 0.849 |
| 414 | 0.965 | 0.868 | 0.832 | 0.888 | 0.832 |
| 415 | 0.960 | 0.873 | 0.841 | 0.891 | 0.837 |
| 416 | 0.957 | 0.884 | 0.838 | 0.893 | 0.839 |
| 417 | 0.962 | 0.881 | 0.838 | 0.894 | 0.841 |
| 418 | 0.965 | 0.889 | 0.850 | 0.902 | 0.852 |
| 419 | 0.968 | 0.871 | 0.847 | 0.895 | 0.842 |

|     |       |       |       |       |       |
|-----|-------|-------|-------|-------|-------|
| 420 | 0.960 | 0.886 | 0.838 | 0.895 | 0.842 |
| 421 | 0.962 | 0.881 | 0.850 | 0.898 | 0.846 |
| 422 | 0.968 | 0.860 | 0.853 | 0.893 | 0.840 |
| 423 | 0.962 | 0.884 | 0.847 | 0.898 | 0.846 |
| 424 | 0.962 | 0.873 | 0.826 | 0.888 | 0.831 |
| 425 | 0.971 | 0.871 | 0.838 | 0.893 | 0.839 |
| 426 | 0.968 | 0.881 | 0.838 | 0.896 | 0.844 |
| 427 | 0.965 | 0.879 | 0.835 | 0.893 | 0.839 |
| 428 | 0.965 | 0.876 | 0.835 | 0.892 | 0.838 |
| 429 | 0.965 | 0.881 | 0.844 | 0.897 | 0.845 |
| 430 | 0.977 | 0.884 | 0.844 | 0.902 | 0.852 |
| 431 | 0.954 | 0.881 | 0.832 | 0.889 | 0.834 |
| 432 | 0.968 | 0.876 | 0.838 | 0.894 | 0.841 |
| 433 | 0.965 | 0.858 | 0.844 | 0.888 | 0.832 |
| 434 | 0.977 | 0.876 | 0.838 | 0.897 | 0.845 |
| 435 | 0.971 | 0.873 | 0.847 | 0.897 | 0.845 |
| 436 | 0.968 | 0.871 | 0.835 | 0.891 | 0.837 |
| 437 | 0.968 | 0.886 | 0.850 | 0.902 | 0.852 |
| 438 | 0.968 | 0.884 | 0.844 | 0.899 | 0.848 |
| 439 | 0.968 | 0.876 | 0.853 | 0.899 | 0.848 |
| 440 | 0.960 | 0.879 | 0.838 | 0.892 | 0.838 |
| 441 | 0.965 | 0.881 | 0.847 | 0.898 | 0.846 |
| 442 | 0.965 | 0.871 | 0.847 | 0.894 | 0.841 |
| 443 | 0.974 | 0.871 | 0.847 | 0.897 | 0.845 |
| 444 | 0.965 | 0.884 | 0.838 | 0.896 | 0.844 |
| 445 | 0.962 | 0.879 | 0.856 | 0.899 | 0.848 |
| 446 | 0.962 | 0.881 | 0.841 | 0.895 | 0.842 |
| 447 | 0.965 | 0.871 | 0.832 | 0.889 | 0.834 |
| 448 | 0.974 | 0.876 | 0.841 | 0.897 | 0.845 |
| 449 | 0.971 | 0.871 | 0.844 | 0.895 | 0.842 |
| 450 | 0.968 | 0.873 | 0.832 | 0.891 | 0.837 |
| 451 | 0.960 | 0.879 | 0.841 | 0.893 | 0.839 |
| 452 | 0.971 | 0.886 | 0.859 | 0.905 | 0.858 |
| 453 | 0.971 | 0.871 | 0.847 | 0.896 | 0.844 |
| 454 | 0.971 | 0.879 | 0.856 | 0.902 | 0.852 |
| 455 | 0.968 | 0.879 | 0.841 | 0.896 | 0.844 |
| 456 | 0.968 | 0.881 | 0.853 | 0.901 | 0.851 |
| 457 | 0.965 | 0.884 | 0.844 | 0.898 | 0.846 |
| 458 | 0.968 | 0.881 | 0.853 | 0.901 | 0.851 |
| 459 | 0.968 | 0.873 | 0.850 | 0.897 | 0.845 |
| 460 | 0.971 | 0.879 | 0.850 | 0.900 | 0.849 |
| 461 | 0.962 | 0.873 | 0.838 | 0.891 | 0.837 |

|     |       |       |       |       |       |
|-----|-------|-------|-------|-------|-------|
| 462 | 0.971 | 0.879 | 0.844 | 0.898 | 0.846 |
| 463 | 0.971 | 0.884 | 0.847 | 0.901 | 0.851 |
| 464 | 0.968 | 0.871 | 0.841 | 0.893 | 0.840 |
| 465 | 0.971 | 0.879 | 0.829 | 0.893 | 0.839 |
| 466 | 0.962 | 0.868 | 0.844 | 0.891 | 0.837 |
| 467 | 0.968 | 0.863 | 0.844 | 0.891 | 0.837 |
| 468 | 0.965 | 0.868 | 0.856 | 0.896 | 0.844 |
| 469 | 0.962 | 0.879 | 0.844 | 0.895 | 0.842 |
| 470 | 0.960 | 0.879 | 0.847 | 0.895 | 0.842 |
| 471 | 0.965 | 0.886 | 0.850 | 0.901 | 0.851 |
| 472 | 0.960 | 0.884 | 0.850 | 0.898 | 0.846 |
| 473 | 0.968 | 0.868 | 0.841 | 0.892 | 0.838 |
| 474 | 0.968 | 0.884 | 0.838 | 0.897 | 0.845 |
| 475 | 0.965 | 0.884 | 0.844 | 0.898 | 0.846 |
| 476 | 0.965 | 0.876 | 0.844 | 0.895 | 0.842 |
| 477 | 0.965 | 0.871 | 0.841 | 0.892 | 0.838 |
| 478 | 0.962 | 0.879 | 0.859 | 0.900 | 0.849 |
| 479 | 0.971 | 0.881 | 0.856 | 0.903 | 0.854 |
| 480 | 0.965 | 0.871 | 0.844 | 0.893 | 0.839 |
| 481 | 0.962 | 0.871 | 0.853 | 0.895 | 0.842 |
| 482 | 0.962 | 0.873 | 0.847 | 0.894 | 0.841 |
| 483 | 0.962 | 0.866 | 0.856 | 0.894 | 0.841 |
| 484 | 0.965 | 0.886 | 0.838 | 0.897 | 0.845 |
| 485 | 0.968 | 0.879 | 0.850 | 0.899 | 0.848 |
| 486 | 0.954 | 0.868 | 0.847 | 0.889 | 0.834 |
| 487 | 0.962 | 0.886 | 0.826 | 0.892 | 0.838 |
| 488 | 0.962 | 0.866 | 0.841 | 0.889 | 0.834 |
| 489 | 0.968 | 0.879 | 0.856 | 0.901 | 0.851 |
| 490 | 0.957 | 0.871 | 0.850 | 0.892 | 0.838 |
| 491 | 0.960 | 0.866 | 0.841 | 0.888 | 0.832 |
| 492 | 0.968 | 0.871 | 0.844 | 0.894 | 0.841 |
| 493 | 0.962 | 0.873 | 0.838 | 0.891 | 0.837 |
| 494 | 0.965 | 0.866 | 0.850 | 0.893 | 0.840 |
| 495 | 0.962 | 0.884 | 0.841 | 0.896 | 0.844 |
| 496 | 0.968 | 0.891 | 0.838 | 0.900 | 0.849 |
| 497 | 0.962 | 0.868 | 0.841 | 0.890 | 0.835 |
| 498 | 0.954 | 0.876 | 0.841 | 0.890 | 0.835 |
| 499 | 0.965 | 0.881 | 0.847 | 0.898 | 0.846 |
| 500 | 0.971 | 0.868 | 0.832 | 0.890 | 0.835 |
| 501 | 0.960 | 0.881 | 0.850 | 0.897 | 0.845 |
| 502 | 0.962 | 0.879 | 0.829 | 0.890 | 0.835 |
| 503 | 0.977 | 0.873 | 0.844 | 0.898 | 0.847 |

|     |       |       |       |       |       |
|-----|-------|-------|-------|-------|-------|
| 504 | 0.968 | 0.879 | 0.841 | 0.896 | 0.844 |
| 505 | 0.968 | 0.871 | 0.841 | 0.893 | 0.839 |
| 506 | 0.965 | 0.868 | 0.841 | 0.891 | 0.837 |
| 507 | 0.965 | 0.873 | 0.850 | 0.896 | 0.844 |
| 508 | 0.965 | 0.873 | 0.823 | 0.888 | 0.831 |
| 509 | 0.962 | 0.889 | 0.850 | 0.901 | 0.851 |
| 510 | 0.962 | 0.868 | 0.841 | 0.890 | 0.835 |
| 511 | 0.968 | 0.873 | 0.826 | 0.889 | 0.834 |
| 512 | 0.968 | 0.879 | 0.826 | 0.891 | 0.837 |
| 513 | 0.965 | 0.879 | 0.844 | 0.896 | 0.844 |
| 514 | 0.968 | 0.886 | 0.829 | 0.895 | 0.842 |
| 515 | 0.968 | 0.868 | 0.844 | 0.893 | 0.839 |
| 516 | 0.965 | 0.879 | 0.835 | 0.893 | 0.839 |
| 517 | 0.965 | 0.879 | 0.841 | 0.895 | 0.842 |
| 518 | 0.971 | 0.886 | 0.835 | 0.898 | 0.847 |
| 519 | 0.960 | 0.876 | 0.820 | 0.886 | 0.828 |
| 520 | 0.971 | 0.879 | 0.838 | 0.896 | 0.844 |
| 521 | 0.965 | 0.868 | 0.826 | 0.887 | 0.830 |
| 522 | 0.971 | 0.876 | 0.835 | 0.894 | 0.841 |
| 523 | 0.968 | 0.881 | 0.832 | 0.894 | 0.841 |
| 524 | 0.960 | 0.879 | 0.838 | 0.892 | 0.838 |
| 525 | 0.971 | 0.868 | 0.823 | 0.888 | 0.831 |
| 526 | 0.974 | 0.871 | 0.847 | 0.897 | 0.845 |
| 527 | 0.965 | 0.881 | 0.847 | 0.898 | 0.846 |
| 528 | 0.965 | 0.876 | 0.847 | 0.896 | 0.844 |
| 529 | 0.965 | 0.873 | 0.829 | 0.889 | 0.834 |
| 530 | 0.968 | 0.881 | 0.826 | 0.892 | 0.838 |
| 531 | 0.968 | 0.881 | 0.841 | 0.897 | 0.845 |
| 532 | 0.962 | 0.879 | 0.844 | 0.895 | 0.842 |
| 533 | 0.971 | 0.876 | 0.832 | 0.893 | 0.839 |
| 534 | 0.974 | 0.873 | 0.832 | 0.893 | 0.839 |
| 535 | 0.968 | 0.871 | 0.832 | 0.890 | 0.835 |
| 536 | 0.968 | 0.873 | 0.835 | 0.892 | 0.838 |
| 537 | 0.962 | 0.873 | 0.832 | 0.889 | 0.834 |
| 538 | 0.957 | 0.863 | 0.841 | 0.887 | 0.830 |
| 539 | 0.968 | 0.879 | 0.844 | 0.897 | 0.845 |
| 540 | 0.965 | 0.871 | 0.829 | 0.888 | 0.832 |
| 541 | 0.971 | 0.879 | 0.832 | 0.894 | 0.841 |
| 542 | 0.965 | 0.881 | 0.832 | 0.893 | 0.839 |
| 543 | 0.968 | 0.881 | 0.850 | 0.900 | 0.849 |
| 544 | 0.968 | 0.876 | 0.838 | 0.894 | 0.841 |
| 545 | 0.962 | 0.863 | 0.823 | 0.883 | 0.824 |

|     |       |       |       |       |       |
|-----|-------|-------|-------|-------|-------|
| 546 | 0.974 | 0.881 | 0.823 | 0.893 | 0.839 |
| 547 | 0.965 | 0.873 | 0.838 | 0.892 | 0.838 |
| 548 | 0.962 | 0.871 | 0.823 | 0.886 | 0.828 |
| 549 | 0.968 | 0.881 | 0.841 | 0.897 | 0.845 |
| 550 | 0.965 | 0.860 | 0.844 | 0.889 | 0.834 |
| 551 | 0.960 | 0.876 | 0.814 | 0.884 | 0.825 |
| 552 | 0.957 | 0.886 | 0.841 | 0.895 | 0.842 |
| 553 | 0.968 | 0.879 | 0.832 | 0.893 | 0.839 |
| 554 | 0.965 | 0.884 | 0.844 | 0.898 | 0.846 |
| 555 | 0.962 | 0.879 | 0.844 | 0.895 | 0.842 |
| 556 | 0.968 | 0.873 | 0.844 | 0.895 | 0.842 |
| 557 | 0.962 | 0.871 | 0.829 | 0.888 | 0.831 |
| 558 | 0.968 | 0.884 | 0.841 | 0.898 | 0.846 |
| 559 | 0.965 | 0.881 | 0.847 | 0.898 | 0.846 |
| 560 | 0.968 | 0.873 | 0.838 | 0.893 | 0.839 |
| 561 | 0.960 | 0.884 | 0.829 | 0.891 | 0.837 |
| 562 | 0.968 | 0.871 | 0.826 | 0.888 | 0.832 |
| 563 | 0.968 | 0.868 | 0.835 | 0.890 | 0.835 |
| 564 | 0.971 | 0.879 | 0.844 | 0.898 | 0.846 |
| 565 | 0.960 | 0.871 | 0.826 | 0.886 | 0.828 |
| 566 | 0.962 | 0.879 | 0.841 | 0.894 | 0.841 |
| 567 | 0.968 | 0.879 | 0.826 | 0.891 | 0.837 |
| 568 | 0.962 | 0.876 | 0.832 | 0.890 | 0.835 |
| 569 | 0.957 | 0.876 | 0.835 | 0.889 | 0.834 |
| 570 | 0.965 | 0.879 | 0.835 | 0.893 | 0.839 |
| 571 | 0.965 | 0.879 | 0.826 | 0.890 | 0.835 |
| 572 | 0.965 | 0.881 | 0.832 | 0.893 | 0.839 |
| 573 | 0.968 | 0.868 | 0.832 | 0.889 | 0.834 |
| 574 | 0.968 | 0.873 | 0.838 | 0.893 | 0.839 |
| 575 | 0.968 | 0.873 | 0.832 | 0.891 | 0.837 |
| 576 | 0.965 | 0.866 | 0.853 | 0.894 | 0.841 |
| 577 | 0.960 | 0.873 | 0.832 | 0.888 | 0.832 |
| 578 | 0.962 | 0.873 | 0.841 | 0.892 | 0.838 |
| 579 | 0.971 | 0.868 | 0.844 | 0.894 | 0.841 |
| 580 | 0.962 | 0.876 | 0.835 | 0.891 | 0.837 |
| 581 | 0.960 | 0.863 | 0.838 | 0.887 | 0.830 |
| 582 | 0.962 | 0.881 | 0.835 | 0.893 | 0.839 |
| 583 | 0.965 | 0.873 | 0.835 | 0.891 | 0.837 |
| 584 | 0.962 | 0.868 | 0.835 | 0.888 | 0.832 |
| 585 | 0.962 | 0.871 | 0.841 | 0.891 | 0.837 |
| 586 | 0.968 | 0.879 | 0.832 | 0.893 | 0.839 |
| 587 | 0.968 | 0.881 | 0.826 | 0.892 | 0.838 |

|     |       |       |       |       |       |
|-----|-------|-------|-------|-------|-------|
| 588 | 0.965 | 0.879 | 0.841 | 0.895 | 0.842 |
| 589 | 0.962 | 0.881 | 0.832 | 0.892 | 0.838 |
| 590 | 0.962 | 0.879 | 0.841 | 0.894 | 0.841 |
| 591 | 0.962 | 0.884 | 0.844 | 0.897 | 0.845 |
| 592 | 0.974 | 0.873 | 0.844 | 0.897 | 0.845 |
| 593 | 0.968 | 0.868 | 0.835 | 0.890 | 0.835 |
| 594 | 0.974 | 0.886 | 0.844 | 0.902 | 0.852 |
| 595 | 0.965 | 0.881 | 0.832 | 0.893 | 0.839 |
| 596 | 0.968 | 0.889 | 0.829 | 0.896 | 0.844 |
| 597 | 0.960 | 0.866 | 0.829 | 0.885 | 0.827 |
| 598 | 0.957 | 0.881 | 0.844 | 0.894 | 0.841 |
| 599 | 0.962 | 0.871 | 0.829 | 0.888 | 0.831 |
| 600 | 0.968 | 0.873 | 0.835 | 0.892 | 0.838 |
| 601 | 0.971 | 0.876 | 0.847 | 0.898 | 0.846 |
| 602 | 0.962 | 0.886 | 0.835 | 0.895 | 0.842 |
| 603 | 0.965 | 0.873 | 0.844 | 0.894 | 0.841 |
| 604 | 0.965 | 0.879 | 0.838 | 0.894 | 0.841 |
| 605 | 0.965 | 0.881 | 0.838 | 0.895 | 0.842 |
| 606 | 0.965 | 0.876 | 0.838 | 0.893 | 0.839 |
| 607 | 0.965 | 0.873 | 0.823 | 0.888 | 0.831 |
| 608 | 0.960 | 0.873 | 0.838 | 0.890 | 0.835 |
| 609 | 0.965 | 0.860 | 0.838 | 0.888 | 0.831 |
| 610 | 0.965 | 0.876 | 0.826 | 0.889 | 0.834 |
| 611 | 0.974 | 0.873 | 0.832 | 0.893 | 0.839 |
| 612 | 0.968 | 0.881 | 0.835 | 0.895 | 0.842 |
| 613 | 0.968 | 0.871 | 0.841 | 0.893 | 0.839 |
| 614 | 0.960 | 0.881 | 0.829 | 0.890 | 0.835 |
| 615 | 0.962 | 0.876 | 0.829 | 0.889 | 0.834 |
| 616 | 0.965 | 0.884 | 0.829 | 0.893 | 0.839 |
| 617 | 0.965 | 0.866 | 0.844 | 0.891 | 0.837 |
| 618 | 0.968 | 0.889 | 0.838 | 0.899 | 0.848 |
| 619 | 0.960 | 0.866 | 0.832 | 0.886 | 0.828 |
| 620 | 0.974 | 0.886 | 0.841 | 0.901 | 0.851 |
| 621 | 0.965 | 0.876 | 0.844 | 0.895 | 0.842 |
| 622 | 0.960 | 0.881 | 0.829 | 0.890 | 0.835 |
| 623 | 0.960 | 0.873 | 0.835 | 0.889 | 0.834 |
| 624 | 0.974 | 0.866 | 0.844 | 0.894 | 0.841 |
| 625 | 0.962 | 0.863 | 0.838 | 0.888 | 0.831 |
| 626 | 0.968 | 0.868 | 0.838 | 0.891 | 0.837 |
| 627 | 0.968 | 0.886 | 0.829 | 0.895 | 0.842 |
| 628 | 0.962 | 0.886 | 0.841 | 0.897 | 0.845 |
| 629 | 0.960 | 0.871 | 0.823 | 0.885 | 0.827 |



|     |       |       |       |       |       |
|-----|-------|-------|-------|-------|-------|
| 630 | 0.971 | 0.868 | 0.838 | 0.892 | 0.838 |
| 631 | 0.965 | 0.868 | 0.823 | 0.886 | 0.828 |
| 632 | 0.957 | 0.863 | 0.859 | 0.892 | 0.838 |
| 633 | 0.965 | 0.871 | 0.838 | 0.891 | 0.837 |
| 634 | 0.960 | 0.866 | 0.832 | 0.886 | 0.828 |
| 635 | 0.962 | 0.873 | 0.838 | 0.891 | 0.837 |
| 636 | 0.974 | 0.868 | 0.829 | 0.890 | 0.835 |
| 637 | 0.977 | 0.881 | 0.820 | 0.893 | 0.839 |
| 638 | 0.971 | 0.879 | 0.844 | 0.898 | 0.846 |
| 639 | 0.968 | 0.876 | 0.835 | 0.893 | 0.839 |
| 640 | 0.965 | 0.863 | 0.832 | 0.887 | 0.830 |
| 641 | 0.968 | 0.871 | 0.841 | 0.893 | 0.839 |
| 642 | 0.957 | 0.873 | 0.832 | 0.888 | 0.831 |
| 643 | 0.962 | 0.876 | 0.829 | 0.889 | 0.834 |
| 644 | 0.968 | 0.873 | 0.823 | 0.888 | 0.832 |
| 645 | 0.971 | 0.884 | 0.832 | 0.896 | 0.844 |
| 646 | 0.965 | 0.881 | 0.841 | 0.896 | 0.844 |
| 647 | 0.968 | 0.889 | 0.835 | 0.898 | 0.846 |
| 648 | 0.965 | 0.871 | 0.823 | 0.887 | 0.830 |
| 649 | 0.968 | 0.881 | 0.838 | 0.896 | 0.844 |
| 650 | 0.968 | 0.876 | 0.826 | 0.890 | 0.835 |
| 651 | 0.965 | 0.868 | 0.841 | 0.891 | 0.837 |
| 652 | 0.968 | 0.871 | 0.850 | 0.896 | 0.844 |
| 653 | 0.954 | 0.876 | 0.835 | 0.888 | 0.832 |
| 654 | 0.965 | 0.860 | 0.838 | 0.888 | 0.831 |
| 655 | 0.971 | 0.876 | 0.826 | 0.891 | 0.837 |
| 656 | 0.968 | 0.871 | 0.835 | 0.891 | 0.837 |
| 657 | 0.968 | 0.876 | 0.832 | 0.892 | 0.838 |
| 658 | 0.954 | 0.881 | 0.841 | 0.892 | 0.838 |
| 659 | 0.968 | 0.881 | 0.835 | 0.895 | 0.842 |
| 660 | 0.974 | 0.866 | 0.826 | 0.888 | 0.832 |
| 661 | 0.974 | 0.879 | 0.835 | 0.896 | 0.844 |
| 662 | 0.965 | 0.873 | 0.847 | 0.895 | 0.842 |
| 663 | 0.965 | 0.868 | 0.835 | 0.889 | 0.834 |
| 664 | 0.965 | 0.866 | 0.823 | 0.885 | 0.827 |
| 665 | 0.968 | 0.876 | 0.814 | 0.887 | 0.830 |
| 666 | 0.974 | 0.879 | 0.838 | 0.897 | 0.845 |
| 667 | 0.957 | 0.886 | 0.844 | 0.896 | 0.844 |
| 668 | 0.965 | 0.876 | 0.826 | 0.889 | 0.834 |
| 669 | 0.974 | 0.873 | 0.829 | 0.892 | 0.838 |
| 670 | 0.962 | 0.881 | 0.841 | 0.895 | 0.842 |
| 671 | 0.968 | 0.871 | 0.835 | 0.891 | 0.837 |

|     |       |       |       |       |       |
|-----|-------|-------|-------|-------|-------|
| 672 | 0.962 | 0.891 | 0.844 | 0.900 | 0.849 |
| 673 | 0.965 | 0.871 | 0.826 | 0.888 | 0.831 |
| 674 | 0.974 | 0.873 | 0.835 | 0.894 | 0.841 |
| 675 | 0.960 | 0.866 | 0.829 | 0.885 | 0.827 |
| 676 | 0.968 | 0.879 | 0.841 | 0.896 | 0.844 |
| 677 | 0.962 | 0.876 | 0.838 | 0.892 | 0.838 |
| 678 | 0.968 | 0.873 | 0.835 | 0.892 | 0.838 |
| 679 | 0.962 | 0.873 | 0.841 | 0.892 | 0.838 |
| 680 | 0.965 | 0.871 | 0.832 | 0.889 | 0.834 |
| 681 | 0.965 | 0.876 | 0.844 | 0.895 | 0.842 |
| 682 | 0.962 | 0.868 | 0.829 | 0.887 | 0.830 |
| 683 | 0.971 | 0.868 | 0.829 | 0.889 | 0.834 |
| 684 | 0.962 | 0.873 | 0.841 | 0.892 | 0.838 |
| 685 | 0.971 | 0.866 | 0.835 | 0.890 | 0.835 |
| 686 | 0.971 | 0.866 | 0.838 | 0.891 | 0.837 |
| 687 | 0.968 | 0.881 | 0.826 | 0.892 | 0.838 |
| 688 | 0.968 | 0.873 | 0.844 | 0.895 | 0.842 |
| 689 | 0.971 | 0.884 | 0.829 | 0.895 | 0.842 |
| 690 | 0.971 | 0.876 | 0.832 | 0.893 | 0.839 |
| 691 | 0.971 | 0.876 | 0.832 | 0.893 | 0.839 |
| 692 | 0.962 | 0.858 | 0.844 | 0.888 | 0.831 |
| 693 | 0.968 | 0.881 | 0.835 | 0.895 | 0.842 |
| 694 | 0.957 | 0.876 | 0.829 | 0.888 | 0.831 |
| 695 | 0.968 | 0.889 | 0.829 | 0.896 | 0.844 |
| 696 | 0.971 | 0.879 | 0.835 | 0.895 | 0.842 |
| 697 | 0.962 | 0.884 | 0.844 | 0.897 | 0.845 |
| 698 | 0.957 | 0.860 | 0.841 | 0.886 | 0.828 |
| 699 | 0.962 | 0.879 | 0.844 | 0.895 | 0.842 |
| 700 | 0.962 | 0.868 | 0.829 | 0.887 | 0.830 |
| 701 | 0.965 | 0.879 | 0.826 | 0.890 | 0.835 |
| 702 | 0.965 | 0.873 | 0.820 | 0.887 | 0.830 |
| 703 | 0.965 | 0.876 | 0.838 | 0.893 | 0.839 |
| 704 | 0.968 | 0.866 | 0.835 | 0.889 | 0.834 |
| 705 | 0.960 | 0.871 | 0.829 | 0.887 | 0.830 |
| 706 | 0.960 | 0.886 | 0.838 | 0.895 | 0.842 |
| 707 | 0.974 | 0.871 | 0.841 | 0.895 | 0.842 |
| 708 | 0.968 | 0.879 | 0.841 | 0.896 | 0.844 |
| 709 | 0.965 | 0.876 | 0.832 | 0.891 | 0.837 |
| 710 | 0.962 | 0.879 | 0.838 | 0.893 | 0.839 |
| 711 | 0.960 | 0.879 | 0.835 | 0.891 | 0.837 |
| 712 | 0.965 | 0.891 | 0.832 | 0.897 | 0.845 |
| 713 | 0.954 | 0.876 | 0.832 | 0.888 | 0.831 |

|     |       |       |       |       |       |
|-----|-------|-------|-------|-------|-------|
| 714 | 0.965 | 0.863 | 0.832 | 0.887 | 0.830 |
| 715 | 0.962 | 0.866 | 0.829 | 0.886 | 0.828 |
| 716 | 0.968 | 0.868 | 0.820 | 0.886 | 0.828 |
| 717 | 0.968 | 0.873 | 0.847 | 0.896 | 0.844 |
| 718 | 0.960 | 0.876 | 0.838 | 0.891 | 0.837 |
| 719 | 0.957 | 0.863 | 0.835 | 0.885 | 0.827 |
| 720 | 0.954 | 0.879 | 0.841 | 0.891 | 0.837 |
| 721 | 0.957 | 0.866 | 0.856 | 0.892 | 0.838 |
| 722 | 0.957 | 0.873 | 0.847 | 0.892 | 0.838 |
| 723 | 0.968 | 0.876 | 0.841 | 0.895 | 0.842 |
| 724 | 0.960 | 0.876 | 0.850 | 0.895 | 0.842 |
| 725 | 0.965 | 0.873 | 0.844 | 0.894 | 0.841 |
| 726 | 0.957 | 0.873 | 0.844 | 0.891 | 0.837 |
| 727 | 0.971 | 0.863 | 0.838 | 0.890 | 0.835 |
| 728 | 0.965 | 0.879 | 0.838 | 0.894 | 0.841 |
| 729 | 0.965 | 0.879 | 0.838 | 0.894 | 0.841 |
| 730 | 0.971 | 0.871 | 0.835 | 0.892 | 0.838 |
| 731 | 0.971 | 0.873 | 0.844 | 0.896 | 0.844 |
| 732 | 0.962 | 0.866 | 0.838 | 0.888 | 0.832 |
| 733 | 0.962 | 0.879 | 0.841 | 0.894 | 0.841 |
| 734 | 0.965 | 0.873 | 0.829 | 0.889 | 0.834 |
| 735 | 0.960 | 0.876 | 0.823 | 0.887 | 0.830 |
| 736 | 0.960 | 0.886 | 0.817 | 0.888 | 0.832 |
| 737 | 0.962 | 0.868 | 0.835 | 0.888 | 0.832 |
| 738 | 0.968 | 0.866 | 0.835 | 0.889 | 0.834 |
| 739 | 0.971 | 0.873 | 0.832 | 0.892 | 0.838 |
| 740 | 0.962 | 0.881 | 0.838 | 0.894 | 0.841 |
| 741 | 0.974 | 0.863 | 0.847 | 0.894 | 0.841 |
| 742 | 0.962 | 0.886 | 0.838 | 0.896 | 0.844 |
| 743 | 0.965 | 0.884 | 0.850 | 0.900 | 0.849 |
| 744 | 0.971 | 0.871 | 0.823 | 0.888 | 0.832 |
| 745 | 0.960 | 0.873 | 0.838 | 0.890 | 0.835 |
| 746 | 0.957 | 0.884 | 0.841 | 0.894 | 0.841 |
| 747 | 0.968 | 0.871 | 0.823 | 0.888 | 0.831 |
| 748 | 0.971 | 0.863 | 0.841 | 0.891 | 0.837 |
| 749 | 0.960 | 0.863 | 0.832 | 0.885 | 0.827 |
| 750 | 0.971 | 0.871 | 0.838 | 0.893 | 0.839 |
| 751 | 0.962 | 0.876 | 0.850 | 0.896 | 0.844 |
| 752 | 0.977 | 0.879 | 0.838 | 0.898 | 0.846 |
| 753 | 0.962 | 0.863 | 0.841 | 0.888 | 0.832 |
| 754 | 0.965 | 0.871 | 0.826 | 0.888 | 0.831 |
| 755 | 0.954 | 0.876 | 0.829 | 0.887 | 0.830 |

|                            |           |             |          |            |            |
|----------------------------|-----------|-------------|----------|------------|------------|
| 756                        | 0.962     | 0.860       | 0.847    | 0.889      | 0.834      |
| 757                        | 0.962     | 0.876       | 0.841    | 0.893      | 0.839      |
| 758                        | 0.974     | 0.871       | 0.844    | 0.896      | 0.844      |
| 759                        | 0.954     | 0.868       | 0.838    | 0.887      | 0.830      |
| 760                        | 0.968     | 0.873       | 0.829    | 0.890      | 0.835      |
| 761                        | 0.965     | 0.866       | 0.841    | 0.890      | 0.835      |
| 762                        | 0.968     | 0.858       | 0.847    | 0.890      | 0.835      |
| 763                        | 0.965     | 0.881       | 0.832    | 0.893      | 0.839      |
| 764                        | 0.968     | 0.876       | 0.826    | 0.890      | 0.835      |
| 765                        | 0.962     | 0.879       | 0.826    | 0.889      | 0.834      |
| 766                        | 0.960     | 0.863       | 0.847    | 0.889      | 0.834      |
| 767                        | 0.971     | 0.876       | 0.853    | 0.900      | 0.849      |
| 768                        | 0.957     | 0.873       | 0.844    | 0.891      | 0.837      |
| 769                        | 0.968     | 0.884       | 0.850    | 0.901      | 0.851      |
| 770                        | 0.965     | 0.873       | 0.826    | 0.888      | 0.832      |
| 771                        | 0.968     | 0.876       | 0.826    | 0.890      | 0.835      |
| 772                        | 0.960     | 0.871       | 0.838    | 0.889      | 0.834      |
| 773                        | 0.974     | 0.881       | 0.820    | 0.892      | 0.838      |
| 774                        | 0.954     | 0.873       | 0.832    | 0.887      | 0.830      |
| 775                        | 0.962     | 0.873       | 0.838    | 0.891      | 0.837      |
| 776                        | 0.960     | 0.876       | 0.841    | 0.892      | 0.838      |
| 777                        | 0.971     | 0.860       | 0.832    | 0.888      | 0.831      |
| 778                        | 0.960     | 0.879       | 0.844    | 0.894      | 0.841      |
| 779                        | 0.965     | 0.871       | 0.832    | 0.889      | 0.834      |
| 780                        | 0.957     | 0.873       | 0.850    | 0.893      | 0.839      |
| 781                        | 0.962     | 0.876       | 0.841    | 0.893      | 0.839      |
| 782                        | 0.968     | 0.871       | 0.847    | 0.895      | 0.842      |
| 783                        | 0.965     | 0.881       | 0.847    | 0.898      | 0.846      |
| 784                        | 0.960     | 0.876       | 0.835    | 0.890      | 0.835      |
| 785                        | 0.960     | 0.873       | 0.847    | 0.893      | 0.839      |
| 786                        | 0.968     | 0.871       | 0.835    | 0.891      | 0.837      |
| 787                        | 0.965     | 0.860       | 0.844    | 0.889      | 0.834      |
| 788                        | 0.962     | 0.876       | 0.826    | 0.888      | 0.832      |
| <b>MCFS</b>                |           |             |          |            |            |
| <b>Numbers of features</b> | <b>G1</b> | <b>G2/M</b> | <b>S</b> | <b>ACC</b> | <b>MCC</b> |
| 1                          | 0.908     | 0.636       | 0.611    | 0.716      | 0.575      |
| 2                          | 0.931     | 0.716       | 0.713    | 0.784      | 0.678      |
| 3                          | 0.974     | 0.729       | 0.757    | 0.817      | 0.727      |
| 4                          | 0.977     | 0.747       | 0.740    | 0.819      | 0.729      |
| 5                          | 0.980     | 0.775       | 0.775    | 0.842      | 0.763      |
| 6                          | 0.980     | 0.773       | 0.775    | 0.841      | 0.762      |
| 7                          | 0.977     | 0.793       | 0.766    | 0.844      | 0.767      |

|    |       |       |       |       |       |
|----|-------|-------|-------|-------|-------|
| 8  | 0.983 | 0.814 | 0.781 | 0.858 | 0.788 |
| 9  | 0.968 | 0.814 | 0.778 | 0.853 | 0.779 |
| 10 | 0.965 | 0.786 | 0.784 | 0.843 | 0.766 |
| 11 | 0.971 | 0.829 | 0.799 | 0.866 | 0.799 |
| 12 | 0.965 | 0.840 | 0.787 | 0.864 | 0.796 |
| 13 | 0.968 | 0.827 | 0.790 | 0.861 | 0.792 |
| 14 | 0.968 | 0.837 | 0.805 | 0.870 | 0.804 |
| 15 | 0.962 | 0.855 | 0.787 | 0.869 | 0.803 |
| 16 | 0.965 | 0.868 | 0.793 | 0.876 | 0.814 |
| 17 | 0.965 | 0.863 | 0.799 | 0.876 | 0.814 |
| 18 | 0.968 | 0.858 | 0.805 | 0.877 | 0.815 |
| 19 | 0.965 | 0.866 | 0.802 | 0.878 | 0.817 |
| 20 | 0.965 | 0.871 | 0.802 | 0.880 | 0.820 |
| 21 | 0.965 | 0.881 | 0.796 | 0.882 | 0.823 |
| 22 | 0.965 | 0.868 | 0.790 | 0.875 | 0.813 |
| 23 | 0.971 | 0.873 | 0.802 | 0.883 | 0.824 |
| 24 | 0.974 | 0.871 | 0.814 | 0.887 | 0.830 |
| 25 | 0.977 | 0.868 | 0.802 | 0.883 | 0.824 |
| 26 | 0.968 | 0.868 | 0.811 | 0.883 | 0.824 |
| 27 | 0.968 | 0.868 | 0.802 | 0.880 | 0.820 |
| 28 | 0.977 | 0.866 | 0.799 | 0.881 | 0.821 |
| 29 | 0.968 | 0.868 | 0.814 | 0.884 | 0.825 |
| 30 | 0.968 | 0.871 | 0.796 | 0.879 | 0.818 |
| 31 | 0.968 | 0.871 | 0.793 | 0.878 | 0.817 |
| 32 | 0.974 | 0.860 | 0.814 | 0.883 | 0.824 |
| 33 | 0.971 | 0.860 | 0.805 | 0.879 | 0.818 |
| 34 | 0.965 | 0.863 | 0.802 | 0.877 | 0.815 |
| 35 | 0.968 | 0.873 | 0.811 | 0.885 | 0.827 |
| 36 | 0.971 | 0.876 | 0.793 | 0.881 | 0.821 |
| 37 | 0.962 | 0.873 | 0.802 | 0.880 | 0.820 |
| 38 | 0.965 | 0.879 | 0.805 | 0.884 | 0.825 |
| 39 | 0.965 | 0.879 | 0.808 | 0.885 | 0.827 |
| 40 | 0.977 | 0.879 | 0.814 | 0.890 | 0.835 |
| 41 | 0.965 | 0.881 | 0.826 | 0.891 | 0.837 |
| 42 | 0.965 | 0.881 | 0.820 | 0.889 | 0.834 |
| 43 | 0.977 | 0.884 | 0.814 | 0.892 | 0.838 |
| 44 | 0.968 | 0.868 | 0.832 | 0.889 | 0.834 |
| 45 | 0.968 | 0.871 | 0.814 | 0.885 | 0.827 |
| 46 | 0.983 | 0.868 | 0.835 | 0.895 | 0.842 |
| 47 | 0.977 | 0.879 | 0.817 | 0.891 | 0.837 |
| 48 | 0.974 | 0.868 | 0.826 | 0.889 | 0.834 |
| 49 | 0.977 | 0.879 | 0.829 | 0.895 | 0.842 |

|    |       |       |       |       |       |
|----|-------|-------|-------|-------|-------|
| 50 | 0.974 | 0.889 | 0.829 | 0.898 | 0.847 |
| 51 | 0.971 | 0.876 | 0.838 | 0.895 | 0.842 |
| 52 | 0.977 | 0.907 | 0.832 | 0.906 | 0.859 |
| 53 | 0.974 | 0.884 | 0.829 | 0.896 | 0.844 |
| 54 | 0.980 | 0.894 | 0.838 | 0.904 | 0.856 |
| 55 | 0.980 | 0.891 | 0.829 | 0.901 | 0.851 |
| 56 | 0.974 | 0.881 | 0.823 | 0.893 | 0.839 |
| 57 | 0.974 | 0.889 | 0.832 | 0.899 | 0.848 |
| 58 | 0.974 | 0.889 | 0.823 | 0.896 | 0.844 |
| 59 | 0.974 | 0.891 | 0.829 | 0.899 | 0.848 |
| 60 | 0.980 | 0.886 | 0.826 | 0.898 | 0.847 |
| 61 | 0.983 | 0.889 | 0.832 | 0.902 | 0.852 |
| 62 | 0.980 | 0.889 | 0.835 | 0.902 | 0.852 |
| 63 | 0.980 | 0.881 | 0.841 | 0.901 | 0.851 |
| 64 | 0.977 | 0.884 | 0.841 | 0.901 | 0.851 |
| 65 | 0.983 | 0.879 | 0.838 | 0.900 | 0.849 |
| 66 | 0.977 | 0.881 | 0.835 | 0.898 | 0.847 |
| 67 | 0.971 | 0.884 | 0.823 | 0.893 | 0.839 |
| 68 | 0.974 | 0.884 | 0.844 | 0.901 | 0.851 |
| 69 | 0.977 | 0.886 | 0.835 | 0.900 | 0.849 |
| 70 | 0.977 | 0.881 | 0.844 | 0.901 | 0.851 |
| 71 | 0.971 | 0.894 | 0.832 | 0.900 | 0.849 |
| 72 | 0.977 | 0.894 | 0.832 | 0.902 | 0.852 |
| 73 | 0.977 | 0.881 | 0.823 | 0.894 | 0.841 |
| 74 | 0.962 | 0.894 | 0.838 | 0.899 | 0.848 |
| 75 | 0.974 | 0.873 | 0.829 | 0.892 | 0.838 |
| 76 | 0.980 | 0.879 | 0.829 | 0.896 | 0.844 |
| 77 | 0.977 | 0.886 | 0.826 | 0.897 | 0.845 |
| 78 | 0.971 | 0.876 | 0.835 | 0.894 | 0.841 |
| 79 | 0.980 | 0.886 | 0.832 | 0.900 | 0.849 |
| 80 | 0.977 | 0.886 | 0.835 | 0.900 | 0.849 |
| 81 | 0.974 | 0.886 | 0.829 | 0.897 | 0.845 |
| 82 | 0.977 | 0.886 | 0.829 | 0.898 | 0.847 |
| 83 | 0.974 | 0.884 | 0.832 | 0.897 | 0.845 |
| 84 | 0.962 | 0.884 | 0.835 | 0.894 | 0.841 |
| 85 | 0.977 | 0.881 | 0.820 | 0.893 | 0.839 |
| 86 | 0.974 | 0.876 | 0.835 | 0.895 | 0.842 |
| 87 | 0.980 | 0.889 | 0.829 | 0.900 | 0.849 |
| 88 | 0.968 | 0.889 | 0.823 | 0.894 | 0.841 |
| 89 | 0.980 | 0.884 | 0.832 | 0.899 | 0.848 |
| 90 | 0.971 | 0.889 | 0.832 | 0.898 | 0.846 |
| 91 | 0.968 | 0.881 | 0.835 | 0.895 | 0.842 |

|     |       |       |       |       |       |
|-----|-------|-------|-------|-------|-------|
| 92  | 0.968 | 0.884 | 0.832 | 0.895 | 0.842 |
| 93  | 0.980 | 0.889 | 0.832 | 0.901 | 0.851 |
| 94  | 0.968 | 0.891 | 0.838 | 0.900 | 0.849 |
| 95  | 0.974 | 0.876 | 0.823 | 0.891 | 0.837 |
| 96  | 0.968 | 0.873 | 0.835 | 0.892 | 0.838 |
| 97  | 0.968 | 0.873 | 0.835 | 0.892 | 0.838 |
| 98  | 0.974 | 0.881 | 0.844 | 0.900 | 0.849 |
| 99  | 0.980 | 0.876 | 0.832 | 0.896 | 0.844 |
| 100 | 0.974 | 0.889 | 0.838 | 0.901 | 0.851 |
| 101 | 0.965 | 0.876 | 0.823 | 0.888 | 0.832 |
| 102 | 0.974 | 0.894 | 0.841 | 0.903 | 0.855 |
| 103 | 0.974 | 0.881 | 0.832 | 0.896 | 0.844 |
| 104 | 0.968 | 0.886 | 0.829 | 0.895 | 0.842 |
| 105 | 0.974 | 0.891 | 0.832 | 0.900 | 0.849 |
| 106 | 0.971 | 0.879 | 0.826 | 0.892 | 0.838 |
| 107 | 0.974 | 0.884 | 0.838 | 0.899 | 0.848 |
| 108 | 0.971 | 0.886 | 0.832 | 0.897 | 0.845 |
| 109 | 0.977 | 0.886 | 0.835 | 0.900 | 0.849 |
| 110 | 0.974 | 0.899 | 0.829 | 0.902 | 0.852 |
| 111 | 0.974 | 0.881 | 0.841 | 0.899 | 0.848 |
| 112 | 0.980 | 0.884 | 0.838 | 0.901 | 0.851 |
| 113 | 0.968 | 0.886 | 0.844 | 0.900 | 0.849 |
| 114 | 0.980 | 0.894 | 0.835 | 0.903 | 0.855 |
| 115 | 0.965 | 0.894 | 0.838 | 0.900 | 0.849 |
| 116 | 0.971 | 0.884 | 0.838 | 0.898 | 0.847 |
| 117 | 0.971 | 0.876 | 0.850 | 0.899 | 0.848 |
| 118 | 0.968 | 0.873 | 0.829 | 0.890 | 0.835 |
| 119 | 0.971 | 0.879 | 0.835 | 0.895 | 0.842 |
| 120 | 0.974 | 0.879 | 0.838 | 0.897 | 0.845 |
| 121 | 0.974 | 0.889 | 0.826 | 0.897 | 0.845 |
| 122 | 0.971 | 0.881 | 0.832 | 0.895 | 0.842 |
| 123 | 0.965 | 0.886 | 0.829 | 0.894 | 0.841 |
| 124 | 0.965 | 0.891 | 0.823 | 0.894 | 0.841 |
| 125 | 0.980 | 0.881 | 0.832 | 0.898 | 0.847 |
| 126 | 0.971 | 0.886 | 0.835 | 0.898 | 0.846 |
| 127 | 0.974 | 0.873 | 0.823 | 0.890 | 0.835 |
| 128 | 0.974 | 0.876 | 0.841 | 0.897 | 0.845 |
| 129 | 0.968 | 0.886 | 0.820 | 0.892 | 0.838 |
| 130 | 0.971 | 0.879 | 0.844 | 0.898 | 0.846 |
| 131 | 0.977 | 0.886 | 0.835 | 0.900 | 0.849 |
| 132 | 0.962 | 0.886 | 0.838 | 0.896 | 0.844 |
| 133 | 0.968 | 0.881 | 0.835 | 0.895 | 0.842 |

|     |       |       |       |       |       |
|-----|-------|-------|-------|-------|-------|
| 134 | 0.971 | 0.894 | 0.838 | 0.902 | 0.852 |
| 135 | 0.968 | 0.894 | 0.823 | 0.896 | 0.844 |
| 136 | 0.980 | 0.889 | 0.823 | 0.898 | 0.847 |
| 137 | 0.977 | 0.881 | 0.832 | 0.897 | 0.845 |
| 138 | 0.974 | 0.889 | 0.844 | 0.903 | 0.854 |
| 139 | 0.977 | 0.886 | 0.838 | 0.901 | 0.851 |
| 140 | 0.968 | 0.886 | 0.832 | 0.896 | 0.844 |
| 141 | 0.968 | 0.886 | 0.844 | 0.900 | 0.849 |
| 142 | 0.977 | 0.871 | 0.838 | 0.895 | 0.842 |
| 143 | 0.971 | 0.881 | 0.850 | 0.901 | 0.851 |
| 144 | 0.971 | 0.879 | 0.838 | 0.896 | 0.844 |
| 145 | 0.977 | 0.876 | 0.841 | 0.898 | 0.846 |
| 146 | 0.974 | 0.886 | 0.847 | 0.903 | 0.854 |
| 147 | 0.968 | 0.886 | 0.850 | 0.902 | 0.852 |
| 148 | 0.962 | 0.879 | 0.844 | 0.895 | 0.842 |
| 149 | 0.968 | 0.886 | 0.835 | 0.897 | 0.845 |
| 150 | 0.971 | 0.879 | 0.850 | 0.900 | 0.849 |
| 151 | 0.965 | 0.873 | 0.826 | 0.888 | 0.832 |
| 152 | 0.974 | 0.879 | 0.841 | 0.898 | 0.846 |
| 153 | 0.968 | 0.881 | 0.838 | 0.896 | 0.844 |
| 154 | 0.971 | 0.881 | 0.847 | 0.900 | 0.849 |
| 155 | 0.974 | 0.876 | 0.838 | 0.896 | 0.844 |
| 156 | 0.977 | 0.871 | 0.844 | 0.897 | 0.845 |
| 157 | 0.968 | 0.886 | 0.844 | 0.900 | 0.849 |
| 158 | 0.974 | 0.871 | 0.841 | 0.895 | 0.842 |
| 159 | 0.968 | 0.876 | 0.835 | 0.893 | 0.839 |
| 160 | 0.980 | 0.871 | 0.847 | 0.899 | 0.848 |
| 161 | 0.968 | 0.881 | 0.835 | 0.895 | 0.842 |
| 162 | 0.971 | 0.853 | 0.841 | 0.888 | 0.831 |
| 163 | 0.968 | 0.879 | 0.847 | 0.898 | 0.847 |
| 164 | 0.971 | 0.876 | 0.838 | 0.895 | 0.842 |
| 165 | 0.965 | 0.876 | 0.856 | 0.899 | 0.848 |
| 166 | 0.977 | 0.876 | 0.847 | 0.900 | 0.849 |
| 167 | 0.962 | 0.868 | 0.844 | 0.891 | 0.837 |
| 168 | 0.980 | 0.879 | 0.835 | 0.898 | 0.847 |
| 169 | 0.977 | 0.886 | 0.853 | 0.905 | 0.858 |
| 170 | 0.974 | 0.879 | 0.823 | 0.892 | 0.838 |
| 171 | 0.971 | 0.871 | 0.841 | 0.894 | 0.841 |
| 172 | 0.968 | 0.871 | 0.850 | 0.896 | 0.844 |
| 173 | 0.977 | 0.897 | 0.832 | 0.903 | 0.854 |
| 174 | 0.977 | 0.881 | 0.829 | 0.896 | 0.844 |
| 175 | 0.971 | 0.881 | 0.841 | 0.898 | 0.846 |



|     |       |       |       |       |       |
|-----|-------|-------|-------|-------|-------|
| 176 | 0.971 | 0.889 | 0.832 | 0.898 | 0.847 |
| 177 | 0.965 | 0.879 | 0.841 | 0.895 | 0.842 |
| 178 | 0.971 | 0.881 | 0.844 | 0.899 | 0.848 |
| 179 | 0.971 | 0.866 | 0.826 | 0.888 | 0.831 |
| 180 | 0.977 | 0.866 | 0.823 | 0.888 | 0.832 |
| 181 | 0.977 | 0.881 | 0.826 | 0.895 | 0.842 |
| 182 | 0.977 | 0.879 | 0.820 | 0.892 | 0.838 |
| 183 | 0.974 | 0.873 | 0.820 | 0.889 | 0.834 |
| 184 | 0.965 | 0.876 | 0.826 | 0.889 | 0.834 |
| 185 | 0.971 | 0.868 | 0.835 | 0.891 | 0.837 |
| 186 | 0.971 | 0.884 | 0.829 | 0.895 | 0.842 |
| 187 | 0.980 | 0.879 | 0.838 | 0.899 | 0.848 |
| 188 | 0.971 | 0.884 | 0.838 | 0.898 | 0.846 |
| 189 | 0.971 | 0.879 | 0.835 | 0.895 | 0.842 |
| 190 | 0.965 | 0.886 | 0.826 | 0.893 | 0.839 |
| 191 | 0.974 | 0.873 | 0.835 | 0.894 | 0.841 |
| 192 | 0.971 | 0.894 | 0.820 | 0.896 | 0.844 |
| 193 | 0.974 | 0.884 | 0.835 | 0.898 | 0.846 |
| 194 | 0.965 | 0.886 | 0.835 | 0.896 | 0.844 |
| 195 | 0.971 | 0.881 | 0.832 | 0.895 | 0.842 |
| 196 | 0.971 | 0.873 | 0.835 | 0.893 | 0.839 |
| 197 | 0.968 | 0.879 | 0.826 | 0.891 | 0.837 |
| 198 | 0.977 | 0.879 | 0.841 | 0.899 | 0.848 |
| 199 | 0.968 | 0.879 | 0.841 | 0.896 | 0.844 |
| 200 | 0.968 | 0.876 | 0.835 | 0.893 | 0.839 |
| 201 | 0.974 | 0.889 | 0.826 | 0.897 | 0.845 |
| 202 | 0.968 | 0.886 | 0.844 | 0.900 | 0.849 |
| 203 | 0.971 | 0.886 | 0.835 | 0.898 | 0.846 |
| 204 | 0.968 | 0.891 | 0.838 | 0.900 | 0.849 |
| 205 | 0.971 | 0.886 | 0.850 | 0.903 | 0.854 |
| 206 | 0.971 | 0.884 | 0.832 | 0.896 | 0.844 |
| 207 | 0.971 | 0.889 | 0.832 | 0.898 | 0.847 |
| 208 | 0.974 | 0.881 | 0.832 | 0.896 | 0.844 |
| 209 | 0.971 | 0.871 | 0.838 | 0.893 | 0.839 |
| 210 | 0.965 | 0.886 | 0.820 | 0.891 | 0.837 |
| 211 | 0.968 | 0.886 | 0.850 | 0.902 | 0.852 |
| 212 | 0.977 | 0.891 | 0.841 | 0.903 | 0.855 |
| 213 | 0.974 | 0.879 | 0.838 | 0.897 | 0.845 |
| 214 | 0.971 | 0.894 | 0.817 | 0.895 | 0.842 |
| 215 | 0.971 | 0.881 | 0.829 | 0.894 | 0.841 |
| 216 | 0.974 | 0.891 | 0.841 | 0.903 | 0.854 |
| 217 | 0.971 | 0.873 | 0.838 | 0.894 | 0.841 |

|     |       |       |       |       |       |
|-----|-------|-------|-------|-------|-------|
| 218 | 0.962 | 0.894 | 0.823 | 0.894 | 0.841 |
| 219 | 0.965 | 0.886 | 0.850 | 0.901 | 0.851 |
| 220 | 0.965 | 0.886 | 0.847 | 0.900 | 0.849 |
| 221 | 0.968 | 0.881 | 0.847 | 0.899 | 0.848 |
| 222 | 0.968 | 0.884 | 0.817 | 0.890 | 0.835 |
| 223 | 0.971 | 0.886 | 0.829 | 0.896 | 0.844 |
| 224 | 0.971 | 0.879 | 0.838 | 0.896 | 0.844 |
| 225 | 0.960 | 0.886 | 0.856 | 0.901 | 0.851 |
| 226 | 0.962 | 0.886 | 0.835 | 0.895 | 0.842 |
| 227 | 0.971 | 0.889 | 0.826 | 0.896 | 0.844 |
| 228 | 0.965 | 0.889 | 0.841 | 0.899 | 0.848 |
| 229 | 0.977 | 0.876 | 0.835 | 0.896 | 0.844 |
| 230 | 0.971 | 0.884 | 0.835 | 0.897 | 0.845 |
| 231 | 0.962 | 0.886 | 0.841 | 0.897 | 0.845 |
| 232 | 0.974 | 0.873 | 0.835 | 0.894 | 0.841 |
| 233 | 0.965 | 0.871 | 0.847 | 0.894 | 0.841 |
| 234 | 0.965 | 0.886 | 0.847 | 0.900 | 0.849 |
| 235 | 0.960 | 0.891 | 0.841 | 0.898 | 0.846 |
| 236 | 0.974 | 0.886 | 0.832 | 0.898 | 0.846 |
| 237 | 0.962 | 0.897 | 0.838 | 0.900 | 0.849 |
| 238 | 0.971 | 0.881 | 0.847 | 0.900 | 0.849 |
| 239 | 0.974 | 0.886 | 0.844 | 0.902 | 0.852 |
| 240 | 0.965 | 0.879 | 0.859 | 0.901 | 0.851 |
| 241 | 0.962 | 0.891 | 0.841 | 0.899 | 0.848 |
| 242 | 0.971 | 0.886 | 0.838 | 0.899 | 0.848 |
| 243 | 0.971 | 0.894 | 0.832 | 0.900 | 0.849 |
| 244 | 0.968 | 0.886 | 0.844 | 0.900 | 0.849 |
| 245 | 0.968 | 0.891 | 0.835 | 0.899 | 0.848 |
| 246 | 0.968 | 0.886 | 0.841 | 0.899 | 0.848 |
| 247 | 0.968 | 0.884 | 0.835 | 0.896 | 0.844 |
| 248 | 0.968 | 0.894 | 0.844 | 0.903 | 0.853 |
| 249 | 0.971 | 0.889 | 0.826 | 0.896 | 0.844 |
| 250 | 0.974 | 0.879 | 0.832 | 0.895 | 0.842 |
| 251 | 0.968 | 0.879 | 0.838 | 0.895 | 0.842 |
| 252 | 0.962 | 0.879 | 0.847 | 0.896 | 0.844 |
| 253 | 0.968 | 0.889 | 0.847 | 0.902 | 0.852 |
| 254 | 0.968 | 0.891 | 0.823 | 0.895 | 0.842 |
| 255 | 0.971 | 0.889 | 0.832 | 0.898 | 0.846 |
| 256 | 0.968 | 0.881 | 0.835 | 0.895 | 0.842 |
| 257 | 0.968 | 0.886 | 0.847 | 0.901 | 0.851 |
| 258 | 0.971 | 0.884 | 0.838 | 0.898 | 0.846 |
| 259 | 0.971 | 0.876 | 0.826 | 0.891 | 0.837 |

|     |       |       |       |       |       |
|-----|-------|-------|-------|-------|-------|
| 260 | 0.971 | 0.876 | 0.835 | 0.894 | 0.841 |
| 261 | 0.957 | 0.884 | 0.847 | 0.896 | 0.844 |
| 262 | 0.965 | 0.881 | 0.829 | 0.892 | 0.838 |
| 263 | 0.965 | 0.884 | 0.826 | 0.892 | 0.838 |
| 264 | 0.960 | 0.881 | 0.844 | 0.895 | 0.842 |
| 265 | 0.968 | 0.884 | 0.838 | 0.897 | 0.845 |
| 266 | 0.965 | 0.881 | 0.850 | 0.899 | 0.848 |
| 267 | 0.974 | 0.873 | 0.835 | 0.894 | 0.841 |
| 268 | 0.968 | 0.884 | 0.829 | 0.894 | 0.841 |
| 269 | 0.965 | 0.886 | 0.838 | 0.897 | 0.845 |
| 270 | 0.957 | 0.879 | 0.847 | 0.894 | 0.841 |
| 271 | 0.971 | 0.871 | 0.841 | 0.894 | 0.841 |
| 272 | 0.968 | 0.881 | 0.838 | 0.896 | 0.844 |
| 273 | 0.965 | 0.873 | 0.841 | 0.893 | 0.839 |
| 274 | 0.974 | 0.876 | 0.838 | 0.896 | 0.844 |
| 275 | 0.962 | 0.894 | 0.838 | 0.899 | 0.848 |
| 276 | 0.971 | 0.876 | 0.847 | 0.898 | 0.846 |
| 277 | 0.960 | 0.886 | 0.853 | 0.900 | 0.849 |
| 278 | 0.962 | 0.884 | 0.847 | 0.898 | 0.846 |
| 279 | 0.968 | 0.889 | 0.841 | 0.900 | 0.849 |
| 280 | 0.968 | 0.891 | 0.847 | 0.903 | 0.853 |
| 281 | 0.974 | 0.873 | 0.835 | 0.894 | 0.841 |
| 282 | 0.968 | 0.879 | 0.844 | 0.897 | 0.845 |
| 283 | 0.974 | 0.879 | 0.847 | 0.900 | 0.849 |
| 284 | 0.962 | 0.881 | 0.841 | 0.895 | 0.842 |
| 285 | 0.968 | 0.894 | 0.829 | 0.898 | 0.847 |
| 286 | 0.965 | 0.868 | 0.853 | 0.895 | 0.842 |
| 287 | 0.962 | 0.881 | 0.838 | 0.894 | 0.841 |
| 288 | 0.974 | 0.884 | 0.844 | 0.901 | 0.851 |
| 289 | 0.971 | 0.889 | 0.841 | 0.901 | 0.851 |
| 290 | 0.971 | 0.876 | 0.850 | 0.899 | 0.848 |
| 291 | 0.974 | 0.884 | 0.850 | 0.903 | 0.854 |
| 292 | 0.965 | 0.884 | 0.835 | 0.895 | 0.842 |
| 293 | 0.965 | 0.891 | 0.853 | 0.903 | 0.855 |
| 294 | 0.971 | 0.897 | 0.847 | 0.905 | 0.858 |
| 295 | 0.968 | 0.868 | 0.838 | 0.891 | 0.837 |
| 296 | 0.971 | 0.891 | 0.841 | 0.902 | 0.852 |
| 297 | 0.971 | 0.886 | 0.850 | 0.903 | 0.854 |
| 298 | 0.971 | 0.881 | 0.841 | 0.898 | 0.846 |
| 299 | 0.962 | 0.881 | 0.844 | 0.896 | 0.844 |
| 300 | 0.965 | 0.881 | 0.847 | 0.898 | 0.846 |
| 301 | 0.974 | 0.884 | 0.853 | 0.903 | 0.855 |

|     |       |       |       |       |       |
|-----|-------|-------|-------|-------|-------|
| 302 | 0.974 | 0.891 | 0.847 | 0.904 | 0.856 |
| 303 | 0.960 | 0.889 | 0.829 | 0.893 | 0.839 |
| 304 | 0.968 | 0.876 | 0.847 | 0.897 | 0.845 |
| 305 | 0.968 | 0.879 | 0.841 | 0.896 | 0.844 |
| 306 | 0.965 | 0.884 | 0.829 | 0.893 | 0.839 |
| 307 | 0.962 | 0.902 | 0.844 | 0.903 | 0.855 |
| 308 | 0.977 | 0.876 | 0.853 | 0.902 | 0.852 |
| 309 | 0.968 | 0.881 | 0.841 | 0.897 | 0.845 |
| 310 | 0.974 | 0.886 | 0.835 | 0.899 | 0.848 |
| 311 | 0.968 | 0.871 | 0.844 | 0.894 | 0.841 |
| 312 | 0.971 | 0.876 | 0.835 | 0.894 | 0.841 |
| 313 | 0.971 | 0.873 | 0.832 | 0.892 | 0.838 |
| 314 | 0.965 | 0.881 | 0.844 | 0.897 | 0.845 |
| 315 | 0.965 | 0.876 | 0.850 | 0.897 | 0.845 |
| 316 | 0.971 | 0.876 | 0.835 | 0.894 | 0.841 |
| 317 | 0.968 | 0.879 | 0.841 | 0.896 | 0.844 |
| 318 | 0.960 | 0.881 | 0.850 | 0.897 | 0.845 |
| 319 | 0.971 | 0.873 | 0.835 | 0.893 | 0.839 |
| 320 | 0.965 | 0.873 | 0.838 | 0.892 | 0.838 |
| 321 | 0.965 | 0.876 | 0.847 | 0.896 | 0.844 |
| 322 | 0.962 | 0.868 | 0.859 | 0.896 | 0.844 |
| 323 | 0.968 | 0.884 | 0.832 | 0.895 | 0.842 |
| 324 | 0.968 | 0.881 | 0.835 | 0.895 | 0.842 |
| 325 | 0.965 | 0.884 | 0.835 | 0.895 | 0.842 |
| 326 | 0.971 | 0.876 | 0.838 | 0.895 | 0.842 |
| 327 | 0.968 | 0.886 | 0.850 | 0.902 | 0.852 |
| 328 | 0.965 | 0.884 | 0.832 | 0.894 | 0.841 |
| 329 | 0.962 | 0.871 | 0.835 | 0.889 | 0.834 |
| 330 | 0.957 | 0.881 | 0.841 | 0.893 | 0.839 |
| 331 | 0.968 | 0.879 | 0.835 | 0.894 | 0.841 |
| 332 | 0.968 | 0.886 | 0.847 | 0.901 | 0.851 |
| 333 | 0.962 | 0.897 | 0.838 | 0.900 | 0.849 |
| 334 | 0.974 | 0.884 | 0.841 | 0.900 | 0.849 |
| 335 | 0.965 | 0.881 | 0.859 | 0.902 | 0.852 |
| 336 | 0.971 | 0.889 | 0.844 | 0.902 | 0.852 |
| 337 | 0.965 | 0.879 | 0.844 | 0.896 | 0.844 |
| 338 | 0.968 | 0.886 | 0.841 | 0.899 | 0.848 |
| 339 | 0.971 | 0.894 | 0.829 | 0.899 | 0.848 |
| 340 | 0.965 | 0.876 | 0.835 | 0.892 | 0.838 |
| 341 | 0.960 | 0.879 | 0.844 | 0.894 | 0.841 |
| 342 | 0.965 | 0.884 | 0.826 | 0.892 | 0.838 |
| 343 | 0.962 | 0.889 | 0.841 | 0.898 | 0.846 |

|     |       |       |       |       |       |
|-----|-------|-------|-------|-------|-------|
| 344 | 0.977 | 0.876 | 0.847 | 0.900 | 0.849 |
| 345 | 0.965 | 0.873 | 0.838 | 0.892 | 0.838 |
| 346 | 0.971 | 0.879 | 0.844 | 0.898 | 0.846 |
| 347 | 0.968 | 0.871 | 0.844 | 0.894 | 0.841 |
| 348 | 0.965 | 0.881 | 0.841 | 0.896 | 0.844 |
| 349 | 0.968 | 0.881 | 0.838 | 0.896 | 0.844 |
| 350 | 0.962 | 0.876 | 0.844 | 0.894 | 0.841 |
| 351 | 0.971 | 0.881 | 0.832 | 0.895 | 0.842 |
| 352 | 0.965 | 0.889 | 0.835 | 0.897 | 0.845 |
| 353 | 0.965 | 0.879 | 0.847 | 0.897 | 0.845 |
| 354 | 0.965 | 0.894 | 0.847 | 0.903 | 0.853 |
| 355 | 0.962 | 0.884 | 0.838 | 0.895 | 0.842 |
| 356 | 0.960 | 0.879 | 0.853 | 0.897 | 0.845 |
| 357 | 0.965 | 0.876 | 0.841 | 0.894 | 0.841 |
| 358 | 0.971 | 0.879 | 0.835 | 0.895 | 0.842 |
| 359 | 0.977 | 0.881 | 0.850 | 0.903 | 0.854 |
| 360 | 0.971 | 0.879 | 0.844 | 0.898 | 0.846 |
| 361 | 0.962 | 0.894 | 0.850 | 0.903 | 0.853 |
| 362 | 0.962 | 0.884 | 0.847 | 0.898 | 0.846 |
| 363 | 0.965 | 0.889 | 0.844 | 0.900 | 0.849 |
| 364 | 0.962 | 0.881 | 0.832 | 0.892 | 0.838 |
| 365 | 0.971 | 0.886 | 0.841 | 0.900 | 0.849 |
| 366 | 0.965 | 0.884 | 0.847 | 0.899 | 0.848 |
| 367 | 0.971 | 0.881 | 0.850 | 0.901 | 0.851 |
| 368 | 0.968 | 0.889 | 0.835 | 0.898 | 0.846 |
| 369 | 0.960 | 0.889 | 0.832 | 0.894 | 0.841 |
| 370 | 0.971 | 0.881 | 0.835 | 0.896 | 0.844 |
| 371 | 0.965 | 0.886 | 0.832 | 0.895 | 0.842 |
| 372 | 0.971 | 0.866 | 0.841 | 0.892 | 0.838 |
| 373 | 0.971 | 0.871 | 0.841 | 0.894 | 0.841 |
| 374 | 0.968 | 0.881 | 0.844 | 0.898 | 0.846 |
| 375 | 0.965 | 0.884 | 0.844 | 0.898 | 0.846 |
| 376 | 0.977 | 0.879 | 0.850 | 0.902 | 0.852 |
| 377 | 0.962 | 0.879 | 0.844 | 0.895 | 0.842 |
| 378 | 0.968 | 0.884 | 0.847 | 0.900 | 0.849 |
| 379 | 0.968 | 0.873 | 0.832 | 0.891 | 0.837 |
| 380 | 0.962 | 0.873 | 0.838 | 0.891 | 0.837 |
| 381 | 0.971 | 0.876 | 0.850 | 0.899 | 0.848 |
| 382 | 0.965 | 0.881 | 0.847 | 0.898 | 0.846 |
| 383 | 0.965 | 0.884 | 0.838 | 0.896 | 0.844 |
| 384 | 0.974 | 0.886 | 0.835 | 0.899 | 0.848 |
| 385 | 0.965 | 0.884 | 0.838 | 0.896 | 0.844 |

|     |       |       |       |       |       |
|-----|-------|-------|-------|-------|-------|
| 386 | 0.974 | 0.894 | 0.841 | 0.903 | 0.855 |
| 387 | 0.971 | 0.879 | 0.838 | 0.896 | 0.844 |
| 388 | 0.965 | 0.884 | 0.844 | 0.898 | 0.846 |
| 389 | 0.974 | 0.884 | 0.850 | 0.903 | 0.854 |
| 390 | 0.965 | 0.879 | 0.850 | 0.898 | 0.846 |
| 391 | 0.962 | 0.879 | 0.850 | 0.897 | 0.845 |
| 392 | 0.968 | 0.879 | 0.847 | 0.898 | 0.846 |
| 393 | 0.965 | 0.879 | 0.841 | 0.895 | 0.842 |
| 394 | 0.965 | 0.873 | 0.844 | 0.894 | 0.841 |
| 395 | 0.968 | 0.879 | 0.853 | 0.900 | 0.849 |
| 396 | 0.965 | 0.886 | 0.841 | 0.898 | 0.846 |
| 397 | 0.971 | 0.884 | 0.838 | 0.898 | 0.846 |
| 398 | 0.965 | 0.889 | 0.841 | 0.899 | 0.848 |
| 399 | 0.974 | 0.886 | 0.838 | 0.900 | 0.849 |
| 400 | 0.971 | 0.879 | 0.841 | 0.897 | 0.845 |
| 401 | 0.971 | 0.886 | 0.838 | 0.899 | 0.848 |
| 402 | 0.965 | 0.884 | 0.835 | 0.895 | 0.842 |
| 403 | 0.968 | 0.889 | 0.856 | 0.904 | 0.856 |
| 404 | 0.962 | 0.871 | 0.856 | 0.896 | 0.844 |
| 405 | 0.957 | 0.884 | 0.835 | 0.892 | 0.838 |
| 406 | 0.971 | 0.881 | 0.838 | 0.897 | 0.845 |
| 407 | 0.974 | 0.889 | 0.850 | 0.904 | 0.856 |
| 408 | 0.954 | 0.860 | 0.853 | 0.888 | 0.833 |
| 409 | 0.971 | 0.881 | 0.844 | 0.899 | 0.848 |
| 410 | 0.968 | 0.879 | 0.844 | 0.897 | 0.845 |
| 411 | 0.962 | 0.886 | 0.847 | 0.899 | 0.848 |
| 412 | 0.965 | 0.876 | 0.850 | 0.897 | 0.845 |
| 413 | 0.971 | 0.876 | 0.847 | 0.898 | 0.846 |
| 414 | 0.977 | 0.876 | 0.847 | 0.900 | 0.849 |
| 415 | 0.968 | 0.879 | 0.859 | 0.902 | 0.852 |
| 416 | 0.965 | 0.879 | 0.847 | 0.897 | 0.845 |
| 417 | 0.962 | 0.871 | 0.841 | 0.891 | 0.837 |
| 418 | 0.965 | 0.884 | 0.832 | 0.894 | 0.841 |
| 419 | 0.965 | 0.868 | 0.853 | 0.895 | 0.842 |
| 420 | 0.968 | 0.873 | 0.850 | 0.897 | 0.845 |
| 421 | 0.974 | 0.876 | 0.856 | 0.902 | 0.852 |
| 422 | 0.968 | 0.866 | 0.844 | 0.892 | 0.838 |
| 423 | 0.965 | 0.868 | 0.841 | 0.891 | 0.837 |
| 424 | 0.968 | 0.871 | 0.847 | 0.895 | 0.842 |
| 425 | 0.957 | 0.876 | 0.829 | 0.888 | 0.831 |
| 426 | 0.971 | 0.884 | 0.850 | 0.902 | 0.852 |
| 427 | 0.968 | 0.884 | 0.838 | 0.897 | 0.845 |

|     |       |       |       |       |       |
|-----|-------|-------|-------|-------|-------|
| 428 | 0.971 | 0.876 | 0.832 | 0.893 | 0.839 |
| 429 | 0.968 | 0.889 | 0.844 | 0.901 | 0.851 |
| 430 | 0.968 | 0.884 | 0.847 | 0.900 | 0.849 |
| 431 | 0.968 | 0.873 | 0.832 | 0.891 | 0.837 |
| 432 | 0.968 | 0.876 | 0.838 | 0.894 | 0.841 |
| 433 | 0.971 | 0.868 | 0.844 | 0.894 | 0.841 |
| 434 | 0.965 | 0.873 | 0.841 | 0.893 | 0.839 |
| 435 | 0.962 | 0.879 | 0.841 | 0.894 | 0.841 |
| 436 | 0.968 | 0.881 | 0.844 | 0.898 | 0.846 |
| 437 | 0.968 | 0.881 | 0.850 | 0.900 | 0.849 |
| 438 | 0.960 | 0.879 | 0.832 | 0.890 | 0.835 |
| 439 | 0.965 | 0.884 | 0.856 | 0.902 | 0.852 |
| 440 | 0.974 | 0.873 | 0.844 | 0.897 | 0.845 |
| 441 | 0.957 | 0.884 | 0.832 | 0.891 | 0.837 |
| 442 | 0.962 | 0.889 | 0.850 | 0.901 | 0.851 |
| 443 | 0.957 | 0.876 | 0.856 | 0.896 | 0.844 |
| 444 | 0.965 | 0.881 | 0.838 | 0.895 | 0.842 |
| 445 | 0.965 | 0.881 | 0.844 | 0.897 | 0.845 |
| 446 | 0.977 | 0.889 | 0.835 | 0.901 | 0.851 |
| 447 | 0.965 | 0.873 | 0.835 | 0.891 | 0.837 |
| 448 | 0.965 | 0.886 | 0.853 | 0.902 | 0.852 |
| 449 | 0.971 | 0.873 | 0.850 | 0.898 | 0.847 |
| 450 | 0.962 | 0.886 | 0.838 | 0.896 | 0.844 |
| 451 | 0.965 | 0.881 | 0.850 | 0.899 | 0.848 |
| 452 | 0.965 | 0.879 | 0.847 | 0.897 | 0.845 |
| 453 | 0.960 | 0.873 | 0.859 | 0.897 | 0.845 |
| 454 | 0.957 | 0.881 | 0.838 | 0.892 | 0.838 |
| 455 | 0.971 | 0.871 | 0.832 | 0.891 | 0.837 |
| 456 | 0.971 | 0.886 | 0.841 | 0.900 | 0.849 |
| 457 | 0.968 | 0.881 | 0.832 | 0.894 | 0.841 |
| 458 | 0.960 | 0.889 | 0.838 | 0.896 | 0.844 |
| 459 | 0.965 | 0.876 | 0.856 | 0.899 | 0.848 |
| 460 | 0.971 | 0.873 | 0.841 | 0.895 | 0.842 |
| 461 | 0.962 | 0.866 | 0.838 | 0.888 | 0.832 |
| 462 | 0.954 | 0.894 | 0.841 | 0.897 | 0.845 |
| 463 | 0.968 | 0.873 | 0.859 | 0.900 | 0.849 |
| 464 | 0.971 | 0.881 | 0.835 | 0.896 | 0.844 |
| 465 | 0.965 | 0.876 | 0.856 | 0.899 | 0.848 |
| 466 | 0.971 | 0.868 | 0.850 | 0.896 | 0.844 |
| 467 | 0.974 | 0.884 | 0.853 | 0.903 | 0.855 |
| 468 | 0.962 | 0.881 | 0.853 | 0.899 | 0.848 |
| 469 | 0.968 | 0.881 | 0.850 | 0.900 | 0.849 |

|     |       |       |       |       |       |
|-----|-------|-------|-------|-------|-------|
| 470 | 0.971 | 0.876 | 0.844 | 0.897 | 0.845 |
| 471 | 0.968 | 0.876 | 0.847 | 0.897 | 0.845 |
| 472 | 0.962 | 0.881 | 0.856 | 0.900 | 0.849 |
| 473 | 0.962 | 0.879 | 0.847 | 0.896 | 0.844 |
| 474 | 0.962 | 0.879 | 0.844 | 0.895 | 0.842 |
| 475 | 0.962 | 0.881 | 0.859 | 0.901 | 0.851 |
| 476 | 0.968 | 0.886 | 0.838 | 0.898 | 0.846 |
| 477 | 0.962 | 0.871 | 0.856 | 0.896 | 0.844 |
| 478 | 0.968 | 0.871 | 0.847 | 0.895 | 0.842 |
| 479 | 0.962 | 0.876 | 0.862 | 0.900 | 0.849 |
| 480 | 0.968 | 0.886 | 0.847 | 0.901 | 0.851 |
| 481 | 0.968 | 0.886 | 0.853 | 0.903 | 0.854 |
| 482 | 0.968 | 0.871 | 0.844 | 0.894 | 0.841 |
| 483 | 0.971 | 0.873 | 0.844 | 0.896 | 0.844 |
| 484 | 0.962 | 0.873 | 0.832 | 0.889 | 0.834 |
| 485 | 0.968 | 0.889 | 0.853 | 0.903 | 0.855 |
| 486 | 0.962 | 0.868 | 0.844 | 0.891 | 0.837 |
| 487 | 0.962 | 0.879 | 0.847 | 0.896 | 0.844 |
| 488 | 0.971 | 0.873 | 0.835 | 0.893 | 0.839 |
| 489 | 0.962 | 0.889 | 0.838 | 0.897 | 0.845 |
| 490 | 0.977 | 0.884 | 0.838 | 0.900 | 0.849 |
| 491 | 0.962 | 0.873 | 0.850 | 0.895 | 0.842 |
| 492 | 0.960 | 0.876 | 0.850 | 0.895 | 0.842 |
| 493 | 0.971 | 0.879 | 0.850 | 0.900 | 0.849 |
| 494 | 0.968 | 0.881 | 0.862 | 0.903 | 0.855 |
| 495 | 0.962 | 0.884 | 0.853 | 0.900 | 0.849 |
| 496 | 0.965 | 0.876 | 0.844 | 0.895 | 0.842 |
| 497 | 0.971 | 0.876 | 0.865 | 0.903 | 0.855 |
| 498 | 0.971 | 0.879 | 0.859 | 0.903 | 0.854 |
| 499 | 0.971 | 0.873 | 0.844 | 0.896 | 0.844 |
| 500 | 0.965 | 0.879 | 0.844 | 0.896 | 0.844 |
| 501 | 0.965 | 0.884 | 0.841 | 0.897 | 0.845 |
| 502 | 0.974 | 0.876 | 0.850 | 0.900 | 0.849 |
| 503 | 0.965 | 0.873 | 0.838 | 0.892 | 0.838 |
| 504 | 0.962 | 0.881 | 0.853 | 0.899 | 0.848 |
| 505 | 0.965 | 0.884 | 0.853 | 0.901 | 0.851 |
| 506 | 0.974 | 0.876 | 0.853 | 0.901 | 0.851 |
| 507 | 0.962 | 0.881 | 0.838 | 0.894 | 0.841 |
| 508 | 0.965 | 0.858 | 0.838 | 0.887 | 0.830 |
| 509 | 0.962 | 0.868 | 0.835 | 0.888 | 0.832 |
| 510 | 0.968 | 0.876 | 0.847 | 0.897 | 0.845 |
| 511 | 0.974 | 0.876 | 0.844 | 0.898 | 0.847 |



|     |       |       |       |       |       |
|-----|-------|-------|-------|-------|-------|
| 512 | 0.962 | 0.881 | 0.841 | 0.895 | 0.842 |
| 513 | 0.965 | 0.873 | 0.862 | 0.900 | 0.849 |
| 514 | 0.962 | 0.873 | 0.847 | 0.894 | 0.841 |
| 515 | 0.965 | 0.866 | 0.841 | 0.890 | 0.835 |
| 516 | 0.974 | 0.884 | 0.850 | 0.903 | 0.853 |
| 517 | 0.971 | 0.860 | 0.850 | 0.893 | 0.840 |
| 518 | 0.971 | 0.876 | 0.844 | 0.897 | 0.845 |
| 519 | 0.971 | 0.873 | 0.838 | 0.894 | 0.841 |
| 520 | 0.971 | 0.873 | 0.859 | 0.901 | 0.851 |
| 521 | 0.957 | 0.871 | 0.859 | 0.895 | 0.842 |
| 522 | 0.968 | 0.884 | 0.850 | 0.901 | 0.851 |
| 523 | 0.965 | 0.860 | 0.841 | 0.888 | 0.832 |
| 524 | 0.962 | 0.868 | 0.856 | 0.895 | 0.842 |
| 525 | 0.960 | 0.860 | 0.841 | 0.887 | 0.830 |
| 526 | 0.962 | 0.868 | 0.853 | 0.894 | 0.841 |
| 527 | 0.965 | 0.871 | 0.853 | 0.896 | 0.844 |
| 528 | 0.968 | 0.866 | 0.847 | 0.893 | 0.839 |
| 529 | 0.971 | 0.873 | 0.847 | 0.897 | 0.845 |
| 530 | 0.965 | 0.884 | 0.838 | 0.896 | 0.844 |
| 531 | 0.971 | 0.873 | 0.859 | 0.901 | 0.851 |
| 532 | 0.962 | 0.873 | 0.847 | 0.894 | 0.841 |
| 533 | 0.968 | 0.868 | 0.850 | 0.895 | 0.842 |
| 534 | 0.960 | 0.871 | 0.844 | 0.891 | 0.837 |
| 535 | 0.968 | 0.884 | 0.847 | 0.900 | 0.849 |
| 536 | 0.962 | 0.881 | 0.841 | 0.895 | 0.842 |
| 537 | 0.968 | 0.866 | 0.841 | 0.891 | 0.837 |
| 538 | 0.965 | 0.891 | 0.850 | 0.903 | 0.853 |
| 539 | 0.960 | 0.879 | 0.841 | 0.893 | 0.839 |
| 540 | 0.968 | 0.871 | 0.871 | 0.903 | 0.854 |
| 541 | 0.971 | 0.876 | 0.832 | 0.893 | 0.839 |
| 542 | 0.962 | 0.881 | 0.832 | 0.892 | 0.838 |
| 543 | 0.971 | 0.873 | 0.841 | 0.895 | 0.842 |
| 544 | 0.962 | 0.876 | 0.847 | 0.895 | 0.842 |
| 545 | 0.974 | 0.881 | 0.853 | 0.903 | 0.854 |
| 546 | 0.968 | 0.876 | 0.844 | 0.896 | 0.844 |
| 547 | 0.968 | 0.866 | 0.844 | 0.892 | 0.838 |
| 548 | 0.962 | 0.873 | 0.856 | 0.897 | 0.845 |
| 549 | 0.971 | 0.868 | 0.838 | 0.892 | 0.838 |
| 550 | 0.962 | 0.879 | 0.853 | 0.898 | 0.846 |
| 551 | 0.962 | 0.876 | 0.838 | 0.892 | 0.838 |
| 552 | 0.962 | 0.881 | 0.844 | 0.896 | 0.844 |
| 553 | 0.962 | 0.881 | 0.841 | 0.895 | 0.842 |

|     |       |       |       |       |       |
|-----|-------|-------|-------|-------|-------|
| 554 | 0.974 | 0.879 | 0.844 | 0.899 | 0.848 |
| 555 | 0.968 | 0.873 | 0.853 | 0.898 | 0.846 |
| 556 | 0.957 | 0.881 | 0.841 | 0.893 | 0.839 |
| 557 | 0.968 | 0.876 | 0.844 | 0.896 | 0.844 |
| 558 | 0.968 | 0.868 | 0.856 | 0.897 | 0.845 |
| 559 | 0.968 | 0.879 | 0.850 | 0.899 | 0.848 |
| 560 | 0.965 | 0.881 | 0.835 | 0.894 | 0.841 |
| 561 | 0.965 | 0.879 | 0.832 | 0.892 | 0.838 |
| 562 | 0.974 | 0.868 | 0.832 | 0.891 | 0.837 |
| 563 | 0.968 | 0.884 | 0.865 | 0.905 | 0.858 |
| 564 | 0.962 | 0.868 | 0.850 | 0.893 | 0.840 |
| 565 | 0.962 | 0.866 | 0.856 | 0.894 | 0.841 |
| 566 | 0.974 | 0.879 | 0.844 | 0.899 | 0.848 |
| 567 | 0.968 | 0.876 | 0.844 | 0.896 | 0.844 |
| 568 | 0.965 | 0.868 | 0.862 | 0.898 | 0.847 |
| 569 | 0.971 | 0.879 | 0.832 | 0.894 | 0.841 |
| 570 | 0.957 | 0.866 | 0.841 | 0.888 | 0.831 |
| 571 | 0.965 | 0.866 | 0.832 | 0.888 | 0.831 |
| 572 | 0.980 | 0.873 | 0.853 | 0.902 | 0.852 |
| 573 | 0.965 | 0.876 | 0.844 | 0.895 | 0.842 |
| 574 | 0.965 | 0.879 | 0.850 | 0.898 | 0.846 |
| 575 | 0.965 | 0.876 | 0.859 | 0.900 | 0.849 |
| 576 | 0.968 | 0.879 | 0.847 | 0.898 | 0.846 |
| 577 | 0.971 | 0.884 | 0.856 | 0.903 | 0.855 |
| 578 | 0.974 | 0.871 | 0.844 | 0.896 | 0.844 |
| 579 | 0.974 | 0.897 | 0.838 | 0.903 | 0.855 |
| 580 | 0.971 | 0.886 | 0.859 | 0.905 | 0.858 |
| 581 | 0.974 | 0.884 | 0.847 | 0.902 | 0.852 |
| 582 | 0.965 | 0.873 | 0.847 | 0.895 | 0.842 |
| 583 | 0.968 | 0.886 | 0.856 | 0.903 | 0.855 |
| 584 | 0.957 | 0.886 | 0.844 | 0.896 | 0.844 |
| 585 | 0.971 | 0.881 | 0.835 | 0.896 | 0.844 |
| 586 | 0.968 | 0.868 | 0.838 | 0.891 | 0.837 |
| 587 | 0.965 | 0.879 | 0.853 | 0.899 | 0.848 |
| 588 | 0.962 | 0.876 | 0.850 | 0.896 | 0.844 |
| 589 | 0.968 | 0.868 | 0.856 | 0.897 | 0.845 |
| 590 | 0.965 | 0.866 | 0.832 | 0.888 | 0.831 |
| 591 | 0.980 | 0.876 | 0.844 | 0.900 | 0.849 |
| 592 | 0.968 | 0.886 | 0.847 | 0.901 | 0.851 |
| 593 | 0.977 | 0.886 | 0.835 | 0.900 | 0.849 |
| 594 | 0.960 | 0.884 | 0.832 | 0.892 | 0.838 |
| 595 | 0.974 | 0.889 | 0.844 | 0.903 | 0.854 |

|     |       |       |       |       |       |
|-----|-------|-------|-------|-------|-------|
| 596 | 0.965 | 0.873 | 0.850 | 0.896 | 0.844 |
| 597 | 0.968 | 0.868 | 0.856 | 0.897 | 0.845 |
| 598 | 0.965 | 0.871 | 0.841 | 0.892 | 0.838 |
| 599 | 0.974 | 0.879 | 0.844 | 0.899 | 0.848 |
| 600 | 0.977 | 0.855 | 0.856 | 0.895 | 0.842 |
| 601 | 0.960 | 0.884 | 0.841 | 0.895 | 0.842 |
| 602 | 0.965 | 0.873 | 0.847 | 0.895 | 0.842 |
| 603 | 0.971 | 0.876 | 0.850 | 0.899 | 0.848 |
| 604 | 0.974 | 0.881 | 0.832 | 0.896 | 0.844 |
| 605 | 0.968 | 0.871 | 0.838 | 0.892 | 0.838 |
| 606 | 0.971 | 0.881 | 0.841 | 0.898 | 0.846 |
| 607 | 0.968 | 0.879 | 0.850 | 0.899 | 0.848 |
| 608 | 0.968 | 0.884 | 0.832 | 0.895 | 0.842 |
| 609 | 0.974 | 0.863 | 0.847 | 0.894 | 0.841 |
| 610 | 0.968 | 0.868 | 0.844 | 0.893 | 0.839 |
| 611 | 0.965 | 0.871 | 0.835 | 0.890 | 0.835 |
| 612 | 0.962 | 0.863 | 0.835 | 0.887 | 0.830 |
| 613 | 0.971 | 0.876 | 0.835 | 0.894 | 0.841 |
| 614 | 0.965 | 0.894 | 0.847 | 0.903 | 0.853 |
| 615 | 0.965 | 0.886 | 0.850 | 0.901 | 0.851 |
| 616 | 0.968 | 0.873 | 0.844 | 0.895 | 0.842 |
| 617 | 0.977 | 0.879 | 0.844 | 0.900 | 0.849 |
| 618 | 0.971 | 0.868 | 0.847 | 0.895 | 0.842 |
| 619 | 0.962 | 0.868 | 0.847 | 0.892 | 0.838 |
| 620 | 0.971 | 0.873 | 0.844 | 0.896 | 0.844 |
| 621 | 0.962 | 0.868 | 0.859 | 0.896 | 0.844 |
| 622 | 0.968 | 0.873 | 0.838 | 0.893 | 0.839 |
| 623 | 0.962 | 0.863 | 0.838 | 0.888 | 0.831 |
| 624 | 0.971 | 0.868 | 0.838 | 0.892 | 0.838 |
| 625 | 0.971 | 0.866 | 0.835 | 0.890 | 0.835 |
| 626 | 0.962 | 0.879 | 0.853 | 0.898 | 0.846 |
| 627 | 0.968 | 0.879 | 0.844 | 0.897 | 0.845 |
| 628 | 0.962 | 0.873 | 0.850 | 0.895 | 0.842 |
| 629 | 0.965 | 0.871 | 0.832 | 0.889 | 0.834 |
| 630 | 0.965 | 0.871 | 0.841 | 0.892 | 0.838 |
| 631 | 0.965 | 0.866 | 0.847 | 0.892 | 0.838 |
| 632 | 0.965 | 0.876 | 0.847 | 0.896 | 0.844 |
| 633 | 0.962 | 0.863 | 0.856 | 0.893 | 0.840 |
| 634 | 0.971 | 0.863 | 0.829 | 0.888 | 0.831 |
| 635 | 0.965 | 0.881 | 0.847 | 0.898 | 0.846 |
| 636 | 0.968 | 0.873 | 0.841 | 0.894 | 0.841 |
| 637 | 0.962 | 0.876 | 0.850 | 0.896 | 0.844 |

|     |       |       |       |       |       |
|-----|-------|-------|-------|-------|-------|
| 638 | 0.962 | 0.855 | 0.862 | 0.892 | 0.838 |
| 639 | 0.965 | 0.873 | 0.841 | 0.893 | 0.839 |
| 640 | 0.971 | 0.866 | 0.832 | 0.889 | 0.834 |
| 641 | 0.968 | 0.879 | 0.832 | 0.893 | 0.839 |
| 642 | 0.962 | 0.863 | 0.835 | 0.887 | 0.830 |
| 643 | 0.971 | 0.881 | 0.844 | 0.899 | 0.848 |
| 644 | 0.960 | 0.876 | 0.859 | 0.898 | 0.847 |
| 645 | 0.971 | 0.889 | 0.838 | 0.900 | 0.849 |
| 646 | 0.971 | 0.866 | 0.850 | 0.895 | 0.842 |
| 647 | 0.962 | 0.873 | 0.844 | 0.893 | 0.839 |
| 648 | 0.968 | 0.871 | 0.859 | 0.899 | 0.848 |
| 649 | 0.962 | 0.881 | 0.841 | 0.895 | 0.842 |
| 650 | 0.974 | 0.866 | 0.847 | 0.895 | 0.842 |
| 651 | 0.971 | 0.863 | 0.844 | 0.892 | 0.838 |
| 652 | 0.974 | 0.876 | 0.835 | 0.895 | 0.842 |
| 653 | 0.960 | 0.873 | 0.850 | 0.894 | 0.841 |
| 654 | 0.965 | 0.886 | 0.847 | 0.900 | 0.849 |
| 655 | 0.957 | 0.879 | 0.856 | 0.897 | 0.845 |
| 656 | 0.962 | 0.873 | 0.832 | 0.889 | 0.834 |
| 657 | 0.965 | 0.879 | 0.829 | 0.891 | 0.837 |
| 658 | 0.965 | 0.879 | 0.853 | 0.899 | 0.848 |
| 659 | 0.957 | 0.873 | 0.844 | 0.891 | 0.837 |
| 660 | 0.968 | 0.866 | 0.841 | 0.891 | 0.837 |
| 661 | 0.971 | 0.879 | 0.832 | 0.894 | 0.841 |
| 662 | 0.968 | 0.881 | 0.841 | 0.897 | 0.845 |
| 663 | 0.962 | 0.873 | 0.847 | 0.894 | 0.841 |
| 664 | 0.960 | 0.871 | 0.847 | 0.892 | 0.838 |
| 665 | 0.968 | 0.873 | 0.850 | 0.897 | 0.845 |
| 666 | 0.968 | 0.868 | 0.838 | 0.891 | 0.837 |
| 667 | 0.965 | 0.866 | 0.832 | 0.888 | 0.831 |
| 668 | 0.968 | 0.879 | 0.853 | 0.900 | 0.849 |
| 669 | 0.971 | 0.873 | 0.847 | 0.897 | 0.845 |
| 670 | 0.974 | 0.873 | 0.850 | 0.899 | 0.848 |
| 671 | 0.974 | 0.876 | 0.832 | 0.894 | 0.841 |
| 672 | 0.968 | 0.866 | 0.853 | 0.895 | 0.842 |
| 673 | 0.977 | 0.876 | 0.841 | 0.898 | 0.846 |
| 674 | 0.971 | 0.876 | 0.847 | 0.898 | 0.846 |
| 675 | 0.971 | 0.884 | 0.844 | 0.900 | 0.849 |
| 676 | 0.971 | 0.886 | 0.829 | 0.896 | 0.844 |
| 677 | 0.962 | 0.871 | 0.844 | 0.892 | 0.838 |
| 678 | 0.974 | 0.871 | 0.832 | 0.892 | 0.838 |
| 679 | 0.968 | 0.879 | 0.853 | 0.900 | 0.849 |

|     |       |       |       |       |       |
|-----|-------|-------|-------|-------|-------|
| 680 | 0.962 | 0.876 | 0.847 | 0.895 | 0.842 |
| 681 | 0.962 | 0.873 | 0.850 | 0.895 | 0.842 |
| 682 | 0.965 | 0.876 | 0.844 | 0.895 | 0.842 |
| 683 | 0.965 | 0.866 | 0.823 | 0.885 | 0.827 |
| 684 | 0.962 | 0.881 | 0.844 | 0.896 | 0.844 |
| 685 | 0.971 | 0.873 | 0.826 | 0.890 | 0.835 |
| 686 | 0.968 | 0.868 | 0.838 | 0.891 | 0.837 |
| 687 | 0.962 | 0.881 | 0.841 | 0.895 | 0.842 |
| 688 | 0.974 | 0.873 | 0.859 | 0.902 | 0.852 |
| 689 | 0.960 | 0.873 | 0.844 | 0.892 | 0.838 |
| 690 | 0.962 | 0.879 | 0.832 | 0.891 | 0.837 |
| 691 | 0.971 | 0.873 | 0.856 | 0.900 | 0.849 |
| 692 | 0.965 | 0.858 | 0.838 | 0.887 | 0.830 |
| 693 | 0.971 | 0.876 | 0.874 | 0.906 | 0.859 |
| 694 | 0.965 | 0.876 | 0.859 | 0.900 | 0.849 |
| 695 | 0.974 | 0.881 | 0.838 | 0.898 | 0.846 |
| 696 | 0.965 | 0.881 | 0.838 | 0.895 | 0.842 |
| 697 | 0.968 | 0.876 | 0.853 | 0.899 | 0.848 |
| 698 | 0.954 | 0.871 | 0.844 | 0.889 | 0.834 |
| 699 | 0.960 | 0.858 | 0.853 | 0.889 | 0.834 |
| 700 | 0.965 | 0.860 | 0.856 | 0.893 | 0.840 |
| 701 | 0.962 | 0.876 | 0.841 | 0.893 | 0.839 |
| 702 | 0.968 | 0.889 | 0.847 | 0.902 | 0.852 |
| 703 | 0.960 | 0.884 | 0.847 | 0.897 | 0.845 |
| 704 | 0.962 | 0.871 | 0.859 | 0.897 | 0.845 |
| 705 | 0.960 | 0.871 | 0.862 | 0.897 | 0.845 |
| 706 | 0.971 | 0.868 | 0.847 | 0.895 | 0.842 |
| 707 | 0.974 | 0.873 | 0.847 | 0.898 | 0.847 |
| 708 | 0.968 | 0.876 | 0.844 | 0.896 | 0.844 |
| 709 | 0.965 | 0.868 | 0.847 | 0.893 | 0.839 |
| 710 | 0.965 | 0.884 | 0.844 | 0.898 | 0.846 |
| 711 | 0.960 | 0.876 | 0.838 | 0.891 | 0.837 |
| 712 | 0.965 | 0.881 | 0.859 | 0.902 | 0.852 |
| 713 | 0.962 | 0.853 | 0.847 | 0.887 | 0.830 |
| 714 | 0.960 | 0.876 | 0.847 | 0.894 | 0.841 |
| 715 | 0.960 | 0.876 | 0.832 | 0.889 | 0.834 |
| 716 | 0.971 | 0.876 | 0.838 | 0.895 | 0.842 |
| 717 | 0.965 | 0.876 | 0.847 | 0.896 | 0.844 |
| 718 | 0.962 | 0.873 | 0.835 | 0.890 | 0.835 |
| 719 | 0.960 | 0.879 | 0.844 | 0.894 | 0.841 |
| 720 | 0.957 | 0.886 | 0.835 | 0.893 | 0.839 |
| 721 | 0.960 | 0.863 | 0.853 | 0.891 | 0.837 |

|     |       |       |       |       |       |
|-----|-------|-------|-------|-------|-------|
| 722 | 0.965 | 0.868 | 0.847 | 0.893 | 0.839 |
| 723 | 0.965 | 0.868 | 0.829 | 0.888 | 0.831 |
| 724 | 0.968 | 0.873 | 0.847 | 0.896 | 0.844 |
| 725 | 0.968 | 0.871 | 0.850 | 0.896 | 0.844 |
| 726 | 0.960 | 0.868 | 0.847 | 0.891 | 0.837 |
| 727 | 0.960 | 0.868 | 0.844 | 0.890 | 0.835 |
| 728 | 0.971 | 0.868 | 0.820 | 0.887 | 0.830 |
| 729 | 0.962 | 0.881 | 0.832 | 0.892 | 0.838 |
| 730 | 0.962 | 0.879 | 0.835 | 0.892 | 0.838 |
| 731 | 0.960 | 0.866 | 0.835 | 0.887 | 0.830 |
| 732 | 0.957 | 0.881 | 0.829 | 0.889 | 0.834 |
| 733 | 0.960 | 0.884 | 0.829 | 0.891 | 0.837 |
| 734 | 0.960 | 0.889 | 0.841 | 0.897 | 0.845 |
| 735 | 0.968 | 0.881 | 0.829 | 0.893 | 0.839 |
| 736 | 0.962 | 0.879 | 0.850 | 0.897 | 0.845 |
| 737 | 0.968 | 0.873 | 0.844 | 0.895 | 0.842 |
| 738 | 0.965 | 0.879 | 0.844 | 0.896 | 0.844 |
| 739 | 0.965 | 0.871 | 0.847 | 0.894 | 0.841 |
| 740 | 0.965 | 0.863 | 0.847 | 0.891 | 0.837 |
| 741 | 0.974 | 0.863 | 0.844 | 0.893 | 0.839 |
| 742 | 0.971 | 0.876 | 0.832 | 0.893 | 0.839 |
| 743 | 0.965 | 0.873 | 0.838 | 0.892 | 0.838 |
| 744 | 0.968 | 0.876 | 0.844 | 0.896 | 0.844 |
| 745 | 0.965 | 0.855 | 0.835 | 0.885 | 0.827 |
| 746 | 0.971 | 0.873 | 0.853 | 0.899 | 0.848 |
| 747 | 0.971 | 0.884 | 0.832 | 0.896 | 0.844 |
| 748 | 0.957 | 0.886 | 0.844 | 0.896 | 0.844 |
| 749 | 0.962 | 0.873 | 0.844 | 0.893 | 0.839 |
| 750 | 0.974 | 0.873 | 0.829 | 0.892 | 0.838 |
| 751 | 0.960 | 0.871 | 0.823 | 0.885 | 0.827 |
| 752 | 0.965 | 0.879 | 0.838 | 0.894 | 0.841 |
| 753 | 0.954 | 0.863 | 0.826 | 0.881 | 0.821 |
| 754 | 0.968 | 0.879 | 0.838 | 0.895 | 0.842 |
| 755 | 0.962 | 0.871 | 0.835 | 0.889 | 0.834 |
| 756 | 0.968 | 0.873 | 0.832 | 0.891 | 0.837 |
| 757 | 0.968 | 0.871 | 0.835 | 0.891 | 0.837 |
| 758 | 0.971 | 0.881 | 0.844 | 0.899 | 0.848 |
| 759 | 0.968 | 0.876 | 0.847 | 0.897 | 0.845 |
| 760 | 0.960 | 0.876 | 0.841 | 0.892 | 0.838 |
| 761 | 0.971 | 0.871 | 0.835 | 0.892 | 0.838 |
| 762 | 0.962 | 0.884 | 0.820 | 0.889 | 0.834 |
| 763 | 0.965 | 0.863 | 0.844 | 0.890 | 0.835 |

|     |       |       |       |       |       |
|-----|-------|-------|-------|-------|-------|
| 764 | 0.965 | 0.881 | 0.841 | 0.896 | 0.844 |
| 765 | 0.968 | 0.871 | 0.835 | 0.891 | 0.837 |
| 766 | 0.974 | 0.873 | 0.832 | 0.893 | 0.839 |
| 767 | 0.957 | 0.873 | 0.838 | 0.889 | 0.834 |
| 768 | 0.965 | 0.871 | 0.829 | 0.888 | 0.832 |
| 769 | 0.960 | 0.873 | 0.835 | 0.889 | 0.834 |
| 770 | 0.971 | 0.866 | 0.841 | 0.892 | 0.838 |
| 771 | 0.962 | 0.871 | 0.847 | 0.893 | 0.839 |
| 772 | 0.957 | 0.881 | 0.835 | 0.891 | 0.837 |
| 773 | 0.977 | 0.866 | 0.844 | 0.895 | 0.842 |
| 774 | 0.971 | 0.871 | 0.835 | 0.892 | 0.838 |
| 775 | 0.971 | 0.863 | 0.832 | 0.888 | 0.832 |
| 776 | 0.968 | 0.881 | 0.844 | 0.898 | 0.846 |
| 777 | 0.971 | 0.863 | 0.826 | 0.887 | 0.830 |
| 778 | 0.971 | 0.873 | 0.838 | 0.894 | 0.841 |
| 779 | 0.968 | 0.868 | 0.838 | 0.891 | 0.837 |
| 780 | 0.974 | 0.881 | 0.832 | 0.896 | 0.844 |
| 781 | 0.971 | 0.886 | 0.835 | 0.898 | 0.846 |
| 782 | 0.968 | 0.879 | 0.835 | 0.894 | 0.841 |
| 783 | 0.965 | 0.866 | 0.826 | 0.886 | 0.828 |
| 784 | 0.971 | 0.868 | 0.838 | 0.892 | 0.838 |
| 785 | 0.962 | 0.881 | 0.841 | 0.895 | 0.842 |
| 786 | 0.968 | 0.863 | 0.826 | 0.886 | 0.828 |
| 787 | 0.965 | 0.868 | 0.844 | 0.892 | 0.838 |
| 788 | 0.960 | 0.868 | 0.850 | 0.892 | 0.838 |

**SHAP by lightGBM**

| <b>Numbers of features</b> | <b>G1</b> | <b>G2/M</b> | <b>S</b> | <b>ACC</b> | <b>MCC</b> |
|----------------------------|-----------|-------------|----------|------------|------------|
| 1                          | 0.908     | 0.636       | 0.611    | 0.716      | 0.575      |
| 2                          | 0.977     | 0.690       | 0.743    | 0.799      | 0.701      |
| 3                          | 0.971     | 0.685       | 0.719    | 0.788      | 0.683      |
| 4                          | 0.971     | 0.783       | 0.793    | 0.847      | 0.771      |
| 5                          | 0.965     | 0.801       | 0.793    | 0.852      | 0.778      |
| 6                          | 0.971     | 0.837       | 0.802    | 0.870      | 0.804      |
| 7                          | 0.974     | 0.858       | 0.826    | 0.886      | 0.828      |
| 8                          | 0.965     | 0.891       | 0.814    | 0.891      | 0.837      |
| 9                          | 0.968     | 0.899       | 0.820    | 0.897      | 0.845      |
| 10                         | 0.965     | 0.891       | 0.808    | 0.889      | 0.834      |
| 11                         | 0.968     | 0.912       | 0.817    | 0.901      | 0.851      |
| 12                         | 0.974     | 0.907       | 0.823    | 0.903      | 0.854      |
| 13                         | 0.974     | 0.912       | 0.826    | 0.905      | 0.858      |
| 14                         | 0.968     | 0.910       | 0.835    | 0.905      | 0.858      |
| 15                         | 0.971     | 0.902       | 0.808    | 0.895      | 0.842      |

|    |       |       |       |       |       |
|----|-------|-------|-------|-------|-------|
| 16 | 0.962 | 0.907 | 0.823 | 0.899 | 0.848 |
| 17 | 0.968 | 0.912 | 0.823 | 0.903 | 0.854 |
| 18 | 0.968 | 0.902 | 0.805 | 0.893 | 0.840 |
| 19 | 0.980 | 0.907 | 0.814 | 0.902 | 0.852 |
| 20 | 0.977 | 0.897 | 0.823 | 0.900 | 0.849 |
| 21 | 0.977 | 0.910 | 0.808 | 0.900 | 0.850 |
| 22 | 0.977 | 0.910 | 0.817 | 0.903 | 0.854 |
| 23 | 0.980 | 0.912 | 0.826 | 0.907 | 0.861 |
| 24 | 0.980 | 0.910 | 0.817 | 0.903 | 0.855 |
| 25 | 0.980 | 0.894 | 0.826 | 0.901 | 0.851 |
| 26 | 0.974 | 0.910 | 0.844 | 0.910 | 0.865 |
| 27 | 0.980 | 0.904 | 0.826 | 0.904 | 0.857 |
| 28 | 0.977 | 0.902 | 0.835 | 0.905 | 0.858 |
| 29 | 0.977 | 0.915 | 0.823 | 0.906 | 0.859 |
| 30 | 0.977 | 0.922 | 0.829 | 0.911 | 0.867 |
| 31 | 0.980 | 0.910 | 0.835 | 0.909 | 0.864 |
| 32 | 0.983 | 0.917 | 0.838 | 0.914 | 0.871 |
| 33 | 0.971 | 0.904 | 0.817 | 0.899 | 0.848 |
| 34 | 0.974 | 0.904 | 0.820 | 0.901 | 0.851 |
| 35 | 0.980 | 0.907 | 0.832 | 0.907 | 0.861 |
| 36 | 0.974 | 0.915 | 0.838 | 0.910 | 0.865 |
| 37 | 0.971 | 0.897 | 0.844 | 0.904 | 0.856 |
| 38 | 0.971 | 0.904 | 0.835 | 0.904 | 0.856 |
| 39 | 0.971 | 0.904 | 0.844 | 0.907 | 0.861 |
| 40 | 0.977 | 0.907 | 0.826 | 0.904 | 0.856 |
| 41 | 0.974 | 0.902 | 0.826 | 0.902 | 0.852 |
| 42 | 0.971 | 0.904 | 0.838 | 0.905 | 0.858 |
| 43 | 0.974 | 0.904 | 0.826 | 0.903 | 0.854 |
| 44 | 0.974 | 0.907 | 0.838 | 0.907 | 0.861 |
| 45 | 0.971 | 0.915 | 0.844 | 0.911 | 0.866 |
| 46 | 0.980 | 0.910 | 0.841 | 0.911 | 0.866 |
| 47 | 0.977 | 0.899 | 0.832 | 0.903 | 0.855 |
| 48 | 0.980 | 0.917 | 0.841 | 0.914 | 0.871 |
| 49 | 0.980 | 0.912 | 0.838 | 0.911 | 0.866 |
| 50 | 0.971 | 0.917 | 0.832 | 0.908 | 0.862 |
| 51 | 0.977 | 0.912 | 0.835 | 0.909 | 0.864 |
| 52 | 0.974 | 0.904 | 0.844 | 0.908 | 0.862 |
| 53 | 0.977 | 0.910 | 0.832 | 0.907 | 0.861 |
| 54 | 0.977 | 0.897 | 0.847 | 0.907 | 0.861 |
| 55 | 0.968 | 0.899 | 0.844 | 0.904 | 0.856 |
| 56 | 0.968 | 0.907 | 0.844 | 0.907 | 0.861 |
| 57 | 0.980 | 0.910 | 0.829 | 0.907 | 0.861 |



|    |       |       |       |       |       |
|----|-------|-------|-------|-------|-------|
| 58 | 0.980 | 0.899 | 0.850 | 0.910 | 0.865 |
| 59 | 0.974 | 0.894 | 0.844 | 0.904 | 0.856 |
| 60 | 0.974 | 0.897 | 0.832 | 0.902 | 0.852 |
| 61 | 0.977 | 0.891 | 0.829 | 0.900 | 0.849 |
| 62 | 0.988 | 0.899 | 0.835 | 0.908 | 0.862 |
| 63 | 0.977 | 0.904 | 0.823 | 0.903 | 0.854 |
| 64 | 0.974 | 0.910 | 0.838 | 0.908 | 0.862 |
| 65 | 0.977 | 0.899 | 0.859 | 0.912 | 0.868 |
| 66 | 0.974 | 0.904 | 0.835 | 0.905 | 0.858 |
| 67 | 0.974 | 0.904 | 0.841 | 0.907 | 0.861 |
| 68 | 0.968 | 0.902 | 0.844 | 0.905 | 0.858 |
| 69 | 0.971 | 0.897 | 0.844 | 0.904 | 0.856 |
| 70 | 0.977 | 0.907 | 0.847 | 0.911 | 0.866 |
| 71 | 0.968 | 0.902 | 0.841 | 0.904 | 0.856 |
| 72 | 0.977 | 0.910 | 0.841 | 0.910 | 0.865 |
| 73 | 0.977 | 0.907 | 0.835 | 0.907 | 0.861 |
| 74 | 0.968 | 0.910 | 0.838 | 0.906 | 0.859 |
| 75 | 0.974 | 0.899 | 0.829 | 0.902 | 0.852 |
| 76 | 0.968 | 0.894 | 0.841 | 0.902 | 0.852 |
| 77 | 0.980 | 0.899 | 0.832 | 0.904 | 0.856 |
| 78 | 0.971 | 0.899 | 0.856 | 0.909 | 0.863 |
| 79 | 0.971 | 0.894 | 0.847 | 0.904 | 0.856 |
| 80 | 0.974 | 0.907 | 0.853 | 0.912 | 0.868 |
| 81 | 0.974 | 0.912 | 0.856 | 0.915 | 0.872 |
| 82 | 0.968 | 0.907 | 0.850 | 0.909 | 0.863 |
| 83 | 0.971 | 0.907 | 0.862 | 0.914 | 0.870 |
| 84 | 0.980 | 0.897 | 0.859 | 0.912 | 0.868 |
| 85 | 0.977 | 0.902 | 0.847 | 0.909 | 0.863 |
| 86 | 0.971 | 0.910 | 0.853 | 0.912 | 0.868 |
| 87 | 0.977 | 0.915 | 0.856 | 0.917 | 0.875 |
| 88 | 0.968 | 0.907 | 0.853 | 0.910 | 0.865 |
| 89 | 0.971 | 0.904 | 0.832 | 0.903 | 0.855 |
| 90 | 0.974 | 0.902 | 0.847 | 0.908 | 0.862 |
| 91 | 0.968 | 0.910 | 0.859 | 0.913 | 0.869 |
| 92 | 0.968 | 0.904 | 0.853 | 0.909 | 0.863 |
| 93 | 0.977 | 0.910 | 0.838 | 0.909 | 0.864 |
| 94 | 0.968 | 0.902 | 0.832 | 0.902 | 0.852 |
| 95 | 0.980 | 0.894 | 0.856 | 0.910 | 0.865 |
| 96 | 0.977 | 0.904 | 0.847 | 0.910 | 0.865 |
| 97 | 0.980 | 0.902 | 0.856 | 0.913 | 0.869 |
| 98 | 0.977 | 0.907 | 0.853 | 0.913 | 0.869 |
| 99 | 0.962 | 0.899 | 0.838 | 0.901 | 0.851 |

|     |       |       |       |       |       |
|-----|-------|-------|-------|-------|-------|
| 100 | 0.968 | 0.902 | 0.853 | 0.908 | 0.862 |
| 101 | 0.962 | 0.907 | 0.844 | 0.905 | 0.858 |
| 102 | 0.965 | 0.904 | 0.835 | 0.903 | 0.854 |
| 103 | 0.971 | 0.904 | 0.844 | 0.907 | 0.861 |
| 104 | 0.962 | 0.904 | 0.856 | 0.908 | 0.862 |
| 105 | 0.974 | 0.899 | 0.832 | 0.903 | 0.854 |
| 106 | 0.962 | 0.899 | 0.844 | 0.903 | 0.853 |
| 107 | 0.962 | 0.904 | 0.859 | 0.909 | 0.863 |
| 108 | 0.965 | 0.910 | 0.832 | 0.903 | 0.855 |
| 109 | 0.962 | 0.899 | 0.838 | 0.901 | 0.851 |
| 110 | 0.971 | 0.904 | 0.850 | 0.909 | 0.863 |
| 111 | 0.971 | 0.904 | 0.847 | 0.908 | 0.862 |
| 112 | 0.980 | 0.886 | 0.850 | 0.905 | 0.858 |
| 113 | 0.968 | 0.907 | 0.847 | 0.908 | 0.862 |
| 114 | 0.974 | 0.897 | 0.850 | 0.907 | 0.861 |
| 115 | 0.971 | 0.907 | 0.844 | 0.908 | 0.862 |
| 116 | 0.968 | 0.894 | 0.841 | 0.902 | 0.852 |
| 117 | 0.971 | 0.907 | 0.841 | 0.907 | 0.861 |
| 118 | 0.965 | 0.910 | 0.835 | 0.904 | 0.856 |
| 119 | 0.968 | 0.907 | 0.859 | 0.912 | 0.868 |
| 120 | 0.965 | 0.904 | 0.841 | 0.904 | 0.856 |
| 121 | 0.971 | 0.910 | 0.850 | 0.911 | 0.866 |
| 122 | 0.968 | 0.899 | 0.832 | 0.901 | 0.851 |
| 123 | 0.974 | 0.904 | 0.844 | 0.908 | 0.862 |
| 124 | 0.971 | 0.891 | 0.850 | 0.904 | 0.856 |
| 125 | 0.971 | 0.897 | 0.847 | 0.905 | 0.858 |
| 126 | 0.980 | 0.899 | 0.847 | 0.909 | 0.863 |
| 127 | 0.974 | 0.899 | 0.844 | 0.906 | 0.859 |
| 128 | 0.962 | 0.904 | 0.841 | 0.903 | 0.855 |
| 129 | 0.971 | 0.904 | 0.859 | 0.912 | 0.868 |
| 130 | 0.968 | 0.910 | 0.841 | 0.907 | 0.861 |
| 131 | 0.968 | 0.899 | 0.844 | 0.904 | 0.856 |
| 132 | 0.974 | 0.902 | 0.847 | 0.908 | 0.862 |
| 133 | 0.968 | 0.897 | 0.853 | 0.906 | 0.859 |
| 134 | 0.971 | 0.902 | 0.856 | 0.910 | 0.865 |
| 135 | 0.968 | 0.891 | 0.841 | 0.901 | 0.851 |
| 136 | 0.957 | 0.897 | 0.847 | 0.901 | 0.851 |
| 137 | 0.965 | 0.907 | 0.841 | 0.905 | 0.858 |
| 138 | 0.968 | 0.904 | 0.838 | 0.904 | 0.856 |
| 139 | 0.965 | 0.904 | 0.841 | 0.904 | 0.856 |
| 140 | 0.977 | 0.910 | 0.847 | 0.912 | 0.868 |
| 141 | 0.965 | 0.902 | 0.856 | 0.908 | 0.862 |

|     |       |       |       |       |       |
|-----|-------|-------|-------|-------|-------|
| 142 | 0.960 | 0.910 | 0.856 | 0.909 | 0.863 |
| 143 | 0.971 | 0.894 | 0.853 | 0.906 | 0.859 |
| 144 | 0.968 | 0.902 | 0.841 | 0.904 | 0.856 |
| 145 | 0.971 | 0.899 | 0.862 | 0.911 | 0.866 |
| 146 | 0.968 | 0.902 | 0.835 | 0.903 | 0.854 |
| 147 | 0.968 | 0.902 | 0.853 | 0.908 | 0.862 |
| 148 | 0.968 | 0.897 | 0.841 | 0.903 | 0.854 |
| 149 | 0.974 | 0.881 | 0.850 | 0.902 | 0.852 |
| 150 | 0.968 | 0.897 | 0.853 | 0.906 | 0.859 |
| 151 | 0.971 | 0.910 | 0.844 | 0.909 | 0.863 |
| 152 | 0.974 | 0.899 | 0.841 | 0.905 | 0.858 |
| 153 | 0.971 | 0.899 | 0.847 | 0.906 | 0.859 |
| 154 | 0.960 | 0.886 | 0.847 | 0.898 | 0.846 |
| 155 | 0.965 | 0.902 | 0.853 | 0.907 | 0.861 |
| 156 | 0.974 | 0.902 | 0.838 | 0.905 | 0.858 |
| 157 | 0.968 | 0.902 | 0.862 | 0.911 | 0.866 |
| 158 | 0.971 | 0.912 | 0.850 | 0.912 | 0.868 |
| 159 | 0.968 | 0.899 | 0.859 | 0.909 | 0.863 |
| 160 | 0.971 | 0.891 | 0.850 | 0.904 | 0.856 |
| 161 | 0.974 | 0.904 | 0.856 | 0.912 | 0.868 |
| 162 | 0.971 | 0.894 | 0.847 | 0.904 | 0.856 |
| 163 | 0.965 | 0.899 | 0.853 | 0.906 | 0.859 |
| 164 | 0.971 | 0.912 | 0.862 | 0.916 | 0.873 |
| 165 | 0.971 | 0.891 | 0.856 | 0.906 | 0.859 |
| 166 | 0.957 | 0.891 | 0.859 | 0.903 | 0.853 |
| 167 | 0.974 | 0.897 | 0.847 | 0.906 | 0.859 |
| 168 | 0.974 | 0.897 | 0.847 | 0.906 | 0.859 |
| 169 | 0.974 | 0.897 | 0.859 | 0.910 | 0.865 |
| 170 | 0.968 | 0.897 | 0.844 | 0.903 | 0.855 |
| 171 | 0.971 | 0.894 | 0.844 | 0.903 | 0.855 |
| 172 | 0.968 | 0.897 | 0.844 | 0.903 | 0.855 |
| 173 | 0.965 | 0.902 | 0.847 | 0.905 | 0.858 |
| 174 | 0.974 | 0.889 | 0.844 | 0.903 | 0.854 |
| 175 | 0.974 | 0.904 | 0.844 | 0.908 | 0.862 |
| 176 | 0.965 | 0.899 | 0.856 | 0.907 | 0.861 |
| 177 | 0.965 | 0.902 | 0.853 | 0.907 | 0.861 |
| 178 | 0.971 | 0.894 | 0.853 | 0.906 | 0.859 |
| 179 | 0.965 | 0.904 | 0.844 | 0.905 | 0.858 |
| 180 | 0.968 | 0.899 | 0.865 | 0.911 | 0.866 |
| 181 | 0.957 | 0.889 | 0.847 | 0.898 | 0.846 |
| 182 | 0.974 | 0.889 | 0.871 | 0.911 | 0.866 |
| 183 | 0.960 | 0.891 | 0.868 | 0.906 | 0.859 |

|     |       |       |       |       |       |
|-----|-------|-------|-------|-------|-------|
| 184 | 0.962 | 0.899 | 0.838 | 0.901 | 0.851 |
| 185 | 0.962 | 0.884 | 0.841 | 0.896 | 0.844 |
| 186 | 0.960 | 0.899 | 0.841 | 0.901 | 0.851 |
| 187 | 0.968 | 0.902 | 0.844 | 0.905 | 0.858 |
| 188 | 0.977 | 0.897 | 0.841 | 0.905 | 0.858 |
| 189 | 0.962 | 0.897 | 0.853 | 0.904 | 0.856 |
| 190 | 0.971 | 0.902 | 0.841 | 0.905 | 0.858 |
| 191 | 0.968 | 0.897 | 0.838 | 0.902 | 0.852 |
| 192 | 0.971 | 0.894 | 0.850 | 0.905 | 0.858 |
| 193 | 0.962 | 0.886 | 0.838 | 0.896 | 0.844 |
| 194 | 0.960 | 0.891 | 0.841 | 0.898 | 0.846 |
| 195 | 0.977 | 0.884 | 0.859 | 0.906 | 0.859 |
| 196 | 0.962 | 0.907 | 0.832 | 0.902 | 0.852 |
| 197 | 0.957 | 0.891 | 0.844 | 0.898 | 0.846 |
| 198 | 0.962 | 0.902 | 0.844 | 0.903 | 0.855 |
| 199 | 0.968 | 0.897 | 0.835 | 0.901 | 0.851 |
| 200 | 0.957 | 0.897 | 0.850 | 0.902 | 0.852 |
| 201 | 0.960 | 0.886 | 0.853 | 0.900 | 0.849 |
| 202 | 0.977 | 0.907 | 0.850 | 0.912 | 0.868 |
| 203 | 0.965 | 0.894 | 0.844 | 0.902 | 0.852 |
| 204 | 0.971 | 0.894 | 0.835 | 0.901 | 0.851 |
| 205 | 0.968 | 0.897 | 0.844 | 0.903 | 0.855 |
| 206 | 0.971 | 0.894 | 0.847 | 0.904 | 0.856 |
| 207 | 0.968 | 0.897 | 0.838 | 0.902 | 0.852 |
| 208 | 0.974 | 0.889 | 0.835 | 0.900 | 0.849 |
| 209 | 0.968 | 0.894 | 0.853 | 0.905 | 0.858 |
| 210 | 0.971 | 0.897 | 0.841 | 0.903 | 0.855 |
| 211 | 0.968 | 0.894 | 0.841 | 0.902 | 0.852 |
| 212 | 0.965 | 0.873 | 0.850 | 0.896 | 0.844 |
| 213 | 0.960 | 0.899 | 0.841 | 0.901 | 0.851 |
| 214 | 0.968 | 0.889 | 0.853 | 0.903 | 0.855 |
| 215 | 0.983 | 0.894 | 0.847 | 0.908 | 0.862 |
| 216 | 0.971 | 0.894 | 0.844 | 0.903 | 0.855 |
| 217 | 0.962 | 0.899 | 0.850 | 0.904 | 0.856 |
| 218 | 0.971 | 0.891 | 0.844 | 0.903 | 0.854 |
| 219 | 0.960 | 0.891 | 0.847 | 0.900 | 0.849 |
| 220 | 0.968 | 0.889 | 0.841 | 0.900 | 0.849 |
| 221 | 0.977 | 0.902 | 0.844 | 0.908 | 0.862 |
| 222 | 0.962 | 0.891 | 0.847 | 0.901 | 0.851 |
| 223 | 0.965 | 0.894 | 0.850 | 0.903 | 0.855 |
| 224 | 0.965 | 0.897 | 0.850 | 0.904 | 0.856 |
| 225 | 0.968 | 0.897 | 0.844 | 0.903 | 0.855 |

|     |       |       |       |       |       |
|-----|-------|-------|-------|-------|-------|
| 226 | 0.962 | 0.891 | 0.850 | 0.902 | 0.852 |
| 227 | 0.971 | 0.897 | 0.844 | 0.904 | 0.856 |
| 228 | 0.974 | 0.899 | 0.829 | 0.902 | 0.852 |
| 229 | 0.971 | 0.889 | 0.835 | 0.899 | 0.848 |
| 230 | 0.957 | 0.894 | 0.862 | 0.904 | 0.856 |
| 231 | 0.974 | 0.891 | 0.850 | 0.905 | 0.858 |
| 232 | 0.971 | 0.886 | 0.841 | 0.900 | 0.849 |
| 233 | 0.977 | 0.884 | 0.847 | 0.903 | 0.854 |
| 234 | 0.968 | 0.889 | 0.853 | 0.903 | 0.855 |
| 235 | 0.977 | 0.881 | 0.853 | 0.903 | 0.855 |
| 236 | 0.968 | 0.894 | 0.853 | 0.905 | 0.858 |
| 237 | 0.968 | 0.897 | 0.850 | 0.905 | 0.858 |
| 238 | 0.971 | 0.894 | 0.856 | 0.907 | 0.861 |
| 239 | 0.968 | 0.886 | 0.856 | 0.903 | 0.855 |
| 240 | 0.971 | 0.891 | 0.841 | 0.902 | 0.852 |
| 241 | 0.962 | 0.894 | 0.850 | 0.903 | 0.853 |
| 242 | 0.968 | 0.886 | 0.844 | 0.900 | 0.849 |
| 243 | 0.974 | 0.889 | 0.838 | 0.901 | 0.851 |
| 244 | 0.974 | 0.876 | 0.844 | 0.898 | 0.847 |
| 245 | 0.962 | 0.884 | 0.853 | 0.900 | 0.849 |
| 246 | 0.968 | 0.891 | 0.853 | 0.904 | 0.856 |
| 247 | 0.968 | 0.899 | 0.856 | 0.908 | 0.862 |
| 248 | 0.962 | 0.891 | 0.850 | 0.902 | 0.852 |
| 249 | 0.968 | 0.899 | 0.859 | 0.909 | 0.863 |
| 250 | 0.974 | 0.889 | 0.856 | 0.906 | 0.859 |
| 251 | 0.968 | 0.902 | 0.862 | 0.911 | 0.866 |
| 252 | 0.962 | 0.884 | 0.862 | 0.903 | 0.854 |
| 253 | 0.965 | 0.897 | 0.847 | 0.903 | 0.855 |
| 254 | 0.957 | 0.891 | 0.862 | 0.903 | 0.855 |
| 255 | 0.971 | 0.884 | 0.832 | 0.896 | 0.844 |
| 256 | 0.968 | 0.894 | 0.868 | 0.910 | 0.865 |
| 257 | 0.977 | 0.889 | 0.838 | 0.902 | 0.852 |
| 258 | 0.968 | 0.879 | 0.847 | 0.898 | 0.847 |
| 259 | 0.962 | 0.904 | 0.853 | 0.907 | 0.861 |
| 260 | 0.965 | 0.886 | 0.862 | 0.904 | 0.856 |
| 261 | 0.965 | 0.889 | 0.862 | 0.905 | 0.858 |
| 262 | 0.971 | 0.899 | 0.853 | 0.908 | 0.862 |
| 263 | 0.960 | 0.897 | 0.850 | 0.903 | 0.853 |
| 264 | 0.971 | 0.889 | 0.859 | 0.906 | 0.859 |
| 265 | 0.968 | 0.910 | 0.850 | 0.910 | 0.865 |
| 266 | 0.962 | 0.889 | 0.847 | 0.900 | 0.849 |
| 267 | 0.971 | 0.897 | 0.859 | 0.909 | 0.863 |

|     |       |       |       |       |       |
|-----|-------|-------|-------|-------|-------|
| 268 | 0.968 | 0.884 | 0.838 | 0.897 | 0.845 |
| 269 | 0.962 | 0.884 | 0.847 | 0.898 | 0.846 |
| 270 | 0.962 | 0.897 | 0.844 | 0.902 | 0.852 |
| 271 | 0.971 | 0.897 | 0.859 | 0.909 | 0.863 |
| 272 | 0.965 | 0.891 | 0.859 | 0.905 | 0.858 |
| 273 | 0.977 | 0.881 | 0.856 | 0.904 | 0.856 |
| 274 | 0.971 | 0.894 | 0.859 | 0.908 | 0.862 |
| 275 | 0.962 | 0.894 | 0.841 | 0.900 | 0.849 |
| 276 | 0.960 | 0.894 | 0.844 | 0.900 | 0.849 |
| 277 | 0.951 | 0.884 | 0.847 | 0.894 | 0.841 |
| 278 | 0.974 | 0.886 | 0.847 | 0.903 | 0.854 |
| 279 | 0.968 | 0.902 | 0.847 | 0.906 | 0.859 |
| 280 | 0.960 | 0.886 | 0.856 | 0.901 | 0.851 |
| 281 | 0.965 | 0.891 | 0.832 | 0.897 | 0.845 |
| 282 | 0.968 | 0.891 | 0.844 | 0.902 | 0.852 |
| 283 | 0.974 | 0.894 | 0.841 | 0.903 | 0.855 |
| 284 | 0.960 | 0.879 | 0.844 | 0.894 | 0.841 |
| 285 | 0.977 | 0.894 | 0.832 | 0.902 | 0.852 |
| 286 | 0.965 | 0.891 | 0.844 | 0.901 | 0.851 |
| 287 | 0.974 | 0.904 | 0.844 | 0.908 | 0.862 |
| 288 | 0.974 | 0.891 | 0.847 | 0.904 | 0.856 |
| 289 | 0.962 | 0.889 | 0.853 | 0.902 | 0.852 |
| 290 | 0.968 | 0.897 | 0.862 | 0.909 | 0.863 |
| 291 | 0.960 | 0.884 | 0.844 | 0.896 | 0.844 |
| 292 | 0.960 | 0.873 | 0.847 | 0.893 | 0.839 |
| 293 | 0.965 | 0.899 | 0.844 | 0.903 | 0.855 |
| 294 | 0.962 | 0.899 | 0.847 | 0.903 | 0.855 |
| 295 | 0.962 | 0.897 | 0.838 | 0.900 | 0.849 |
| 296 | 0.971 | 0.884 | 0.844 | 0.900 | 0.849 |
| 297 | 0.968 | 0.886 | 0.847 | 0.901 | 0.851 |
| 298 | 0.962 | 0.889 | 0.856 | 0.903 | 0.853 |
| 299 | 0.957 | 0.889 | 0.844 | 0.897 | 0.845 |
| 300 | 0.968 | 0.891 | 0.838 | 0.900 | 0.849 |
| 301 | 0.968 | 0.881 | 0.856 | 0.902 | 0.852 |
| 302 | 0.962 | 0.886 | 0.853 | 0.901 | 0.851 |
| 303 | 0.971 | 0.897 | 0.856 | 0.908 | 0.862 |
| 304 | 0.960 | 0.881 | 0.850 | 0.897 | 0.845 |
| 305 | 0.974 | 0.891 | 0.841 | 0.903 | 0.854 |
| 306 | 0.954 | 0.876 | 0.844 | 0.891 | 0.837 |
| 307 | 0.965 | 0.894 | 0.850 | 0.903 | 0.855 |
| 308 | 0.965 | 0.899 | 0.856 | 0.907 | 0.861 |
| 309 | 0.968 | 0.889 | 0.859 | 0.905 | 0.858 |

|     |       |       |       |       |       |
|-----|-------|-------|-------|-------|-------|
| 310 | 0.968 | 0.904 | 0.847 | 0.907 | 0.861 |
| 311 | 0.960 | 0.889 | 0.841 | 0.897 | 0.845 |
| 312 | 0.965 | 0.886 | 0.838 | 0.897 | 0.845 |
| 313 | 0.962 | 0.889 | 0.847 | 0.900 | 0.849 |
| 314 | 0.968 | 0.889 | 0.847 | 0.902 | 0.852 |
| 315 | 0.971 | 0.886 | 0.838 | 0.899 | 0.848 |
| 316 | 0.968 | 0.881 | 0.841 | 0.897 | 0.845 |
| 317 | 0.968 | 0.884 | 0.850 | 0.901 | 0.851 |
| 318 | 0.968 | 0.881 | 0.844 | 0.898 | 0.846 |
| 319 | 0.974 | 0.897 | 0.841 | 0.904 | 0.856 |
| 320 | 0.968 | 0.889 | 0.841 | 0.900 | 0.849 |
| 321 | 0.971 | 0.897 | 0.865 | 0.911 | 0.866 |
| 322 | 0.965 | 0.899 | 0.850 | 0.905 | 0.858 |
| 323 | 0.971 | 0.894 | 0.847 | 0.904 | 0.856 |
| 324 | 0.965 | 0.894 | 0.862 | 0.907 | 0.861 |
| 325 | 0.965 | 0.902 | 0.850 | 0.906 | 0.859 |
| 326 | 0.971 | 0.902 | 0.841 | 0.905 | 0.858 |
| 327 | 0.968 | 0.873 | 0.853 | 0.898 | 0.847 |
| 328 | 0.968 | 0.889 | 0.850 | 0.903 | 0.853 |
| 329 | 0.962 | 0.886 | 0.847 | 0.899 | 0.848 |
| 330 | 0.968 | 0.884 | 0.847 | 0.900 | 0.849 |
| 331 | 0.965 | 0.897 | 0.844 | 0.903 | 0.854 |
| 332 | 0.965 | 0.891 | 0.859 | 0.905 | 0.858 |
| 333 | 0.968 | 0.881 | 0.850 | 0.900 | 0.849 |
| 334 | 0.965 | 0.884 | 0.853 | 0.901 | 0.851 |
| 335 | 0.960 | 0.891 | 0.844 | 0.899 | 0.848 |
| 336 | 0.968 | 0.884 | 0.847 | 0.900 | 0.849 |
| 337 | 0.971 | 0.891 | 0.853 | 0.905 | 0.858 |
| 338 | 0.968 | 0.889 | 0.856 | 0.904 | 0.856 |
| 339 | 0.968 | 0.881 | 0.862 | 0.903 | 0.855 |
| 340 | 0.971 | 0.886 | 0.844 | 0.901 | 0.851 |
| 341 | 0.960 | 0.886 | 0.844 | 0.897 | 0.845 |
| 342 | 0.965 | 0.894 | 0.844 | 0.902 | 0.852 |
| 343 | 0.968 | 0.894 | 0.847 | 0.903 | 0.855 |
| 344 | 0.962 | 0.876 | 0.856 | 0.898 | 0.846 |
| 345 | 0.968 | 0.886 | 0.856 | 0.903 | 0.855 |
| 346 | 0.962 | 0.889 | 0.853 | 0.902 | 0.852 |
| 347 | 0.971 | 0.889 | 0.865 | 0.908 | 0.862 |
| 348 | 0.968 | 0.884 | 0.847 | 0.900 | 0.849 |
| 349 | 0.974 | 0.902 | 0.853 | 0.910 | 0.865 |
| 350 | 0.968 | 0.884 | 0.853 | 0.902 | 0.852 |
| 351 | 0.968 | 0.876 | 0.838 | 0.894 | 0.841 |

|     |       |       |       |       |       |
|-----|-------|-------|-------|-------|-------|
| 352 | 0.971 | 0.889 | 0.853 | 0.904 | 0.856 |
| 353 | 0.954 | 0.876 | 0.847 | 0.892 | 0.838 |
| 354 | 0.965 | 0.889 | 0.856 | 0.903 | 0.855 |
| 355 | 0.968 | 0.884 | 0.847 | 0.900 | 0.849 |
| 356 | 0.968 | 0.884 | 0.862 | 0.904 | 0.856 |
| 357 | 0.960 | 0.894 | 0.841 | 0.899 | 0.848 |
| 358 | 0.974 | 0.881 | 0.865 | 0.906 | 0.859 |
| 359 | 0.962 | 0.891 | 0.838 | 0.898 | 0.846 |
| 360 | 0.962 | 0.899 | 0.838 | 0.901 | 0.851 |
| 361 | 0.968 | 0.899 | 0.862 | 0.910 | 0.865 |
| 362 | 0.965 | 0.879 | 0.853 | 0.899 | 0.848 |
| 363 | 0.957 | 0.894 | 0.850 | 0.901 | 0.851 |
| 364 | 0.971 | 0.886 | 0.853 | 0.903 | 0.855 |
| 365 | 0.968 | 0.894 | 0.847 | 0.903 | 0.855 |
| 366 | 0.965 | 0.897 | 0.853 | 0.905 | 0.858 |
| 367 | 0.965 | 0.897 | 0.859 | 0.907 | 0.861 |
| 368 | 0.965 | 0.884 | 0.847 | 0.899 | 0.848 |
| 369 | 0.971 | 0.902 | 0.841 | 0.905 | 0.858 |
| 370 | 0.962 | 0.884 | 0.862 | 0.903 | 0.853 |
| 371 | 0.971 | 0.884 | 0.847 | 0.901 | 0.851 |
| 372 | 0.962 | 0.886 | 0.841 | 0.897 | 0.845 |
| 373 | 0.971 | 0.897 | 0.835 | 0.902 | 0.852 |
| 374 | 0.962 | 0.886 | 0.841 | 0.897 | 0.845 |
| 375 | 0.971 | 0.897 | 0.850 | 0.906 | 0.859 |
| 376 | 0.968 | 0.891 | 0.847 | 0.903 | 0.853 |
| 377 | 0.965 | 0.902 | 0.841 | 0.903 | 0.855 |
| 378 | 0.974 | 0.894 | 0.859 | 0.909 | 0.863 |
| 379 | 0.962 | 0.884 | 0.841 | 0.896 | 0.844 |
| 380 | 0.971 | 0.886 | 0.844 | 0.901 | 0.851 |
| 381 | 0.974 | 0.873 | 0.856 | 0.901 | 0.851 |
| 382 | 0.962 | 0.894 | 0.835 | 0.898 | 0.846 |
| 383 | 0.965 | 0.889 | 0.853 | 0.903 | 0.853 |
| 384 | 0.968 | 0.889 | 0.856 | 0.904 | 0.856 |
| 385 | 0.971 | 0.894 | 0.847 | 0.904 | 0.856 |
| 386 | 0.974 | 0.897 | 0.850 | 0.907 | 0.861 |
| 387 | 0.957 | 0.881 | 0.850 | 0.896 | 0.844 |
| 388 | 0.957 | 0.889 | 0.850 | 0.899 | 0.848 |
| 389 | 0.968 | 0.891 | 0.847 | 0.903 | 0.853 |
| 390 | 0.960 | 0.876 | 0.841 | 0.892 | 0.838 |
| 391 | 0.962 | 0.889 | 0.850 | 0.901 | 0.851 |
| 392 | 0.965 | 0.876 | 0.850 | 0.897 | 0.845 |
| 393 | 0.968 | 0.884 | 0.853 | 0.902 | 0.852 |



|     |       |       |       |       |       |
|-----|-------|-------|-------|-------|-------|
| 394 | 0.962 | 0.879 | 0.838 | 0.893 | 0.839 |
| 395 | 0.968 | 0.884 | 0.862 | 0.904 | 0.856 |
| 396 | 0.968 | 0.876 | 0.841 | 0.895 | 0.842 |
| 397 | 0.965 | 0.889 | 0.847 | 0.901 | 0.851 |
| 398 | 0.957 | 0.889 | 0.850 | 0.899 | 0.848 |
| 399 | 0.977 | 0.897 | 0.847 | 0.907 | 0.861 |
| 400 | 0.968 | 0.879 | 0.844 | 0.897 | 0.845 |
| 401 | 0.965 | 0.881 | 0.850 | 0.899 | 0.848 |
| 402 | 0.971 | 0.876 | 0.838 | 0.895 | 0.842 |
| 403 | 0.971 | 0.891 | 0.835 | 0.900 | 0.849 |
| 404 | 0.971 | 0.871 | 0.844 | 0.895 | 0.842 |
| 405 | 0.977 | 0.886 | 0.856 | 0.906 | 0.859 |
| 406 | 0.968 | 0.897 | 0.850 | 0.905 | 0.858 |
| 407 | 0.965 | 0.884 | 0.847 | 0.899 | 0.848 |
| 408 | 0.965 | 0.889 | 0.844 | 0.900 | 0.849 |
| 409 | 0.962 | 0.897 | 0.865 | 0.908 | 0.862 |
| 410 | 0.968 | 0.891 | 0.835 | 0.899 | 0.848 |
| 411 | 0.968 | 0.889 | 0.847 | 0.902 | 0.852 |
| 412 | 0.962 | 0.891 | 0.853 | 0.903 | 0.853 |
| 413 | 0.965 | 0.889 | 0.847 | 0.901 | 0.851 |
| 414 | 0.965 | 0.894 | 0.850 | 0.903 | 0.855 |
| 415 | 0.965 | 0.876 | 0.838 | 0.893 | 0.839 |
| 416 | 0.962 | 0.886 | 0.853 | 0.901 | 0.851 |
| 417 | 0.968 | 0.891 | 0.835 | 0.899 | 0.848 |
| 418 | 0.974 | 0.881 | 0.835 | 0.897 | 0.845 |
| 419 | 0.962 | 0.904 | 0.844 | 0.904 | 0.856 |
| 420 | 0.965 | 0.873 | 0.853 | 0.897 | 0.845 |
| 421 | 0.962 | 0.889 | 0.847 | 0.900 | 0.849 |
| 422 | 0.960 | 0.871 | 0.844 | 0.891 | 0.837 |
| 423 | 0.968 | 0.897 | 0.841 | 0.903 | 0.854 |
| 424 | 0.968 | 0.873 | 0.853 | 0.898 | 0.846 |
| 425 | 0.962 | 0.897 | 0.844 | 0.902 | 0.852 |
| 426 | 0.960 | 0.891 | 0.844 | 0.899 | 0.848 |
| 427 | 0.965 | 0.881 | 0.847 | 0.898 | 0.846 |
| 428 | 0.971 | 0.889 | 0.844 | 0.902 | 0.852 |
| 429 | 0.962 | 0.886 | 0.853 | 0.901 | 0.851 |
| 430 | 0.968 | 0.884 | 0.850 | 0.901 | 0.851 |
| 431 | 0.962 | 0.894 | 0.847 | 0.902 | 0.852 |
| 432 | 0.960 | 0.876 | 0.847 | 0.894 | 0.841 |
| 433 | 0.962 | 0.891 | 0.865 | 0.906 | 0.859 |
| 434 | 0.974 | 0.868 | 0.853 | 0.898 | 0.847 |
| 435 | 0.962 | 0.886 | 0.835 | 0.895 | 0.842 |

|     |       |       |       |       |       |
|-----|-------|-------|-------|-------|-------|
| 436 | 0.965 | 0.876 | 0.844 | 0.895 | 0.842 |
| 437 | 0.962 | 0.894 | 0.838 | 0.899 | 0.848 |
| 438 | 0.965 | 0.884 | 0.847 | 0.899 | 0.848 |
| 439 | 0.968 | 0.884 | 0.838 | 0.897 | 0.845 |
| 440 | 0.962 | 0.879 | 0.853 | 0.898 | 0.846 |
| 441 | 0.968 | 0.886 | 0.844 | 0.900 | 0.849 |
| 442 | 0.962 | 0.897 | 0.841 | 0.901 | 0.851 |
| 443 | 0.974 | 0.894 | 0.850 | 0.906 | 0.859 |
| 444 | 0.962 | 0.871 | 0.844 | 0.892 | 0.838 |
| 445 | 0.968 | 0.884 | 0.841 | 0.898 | 0.846 |
| 446 | 0.968 | 0.891 | 0.838 | 0.900 | 0.849 |
| 447 | 0.960 | 0.884 | 0.844 | 0.896 | 0.844 |
| 448 | 0.962 | 0.884 | 0.850 | 0.899 | 0.848 |
| 449 | 0.962 | 0.879 | 0.844 | 0.895 | 0.842 |
| 450 | 0.971 | 0.891 | 0.835 | 0.900 | 0.849 |
| 451 | 0.957 | 0.879 | 0.841 | 0.892 | 0.838 |
| 452 | 0.965 | 0.897 | 0.835 | 0.900 | 0.849 |
| 453 | 0.971 | 0.881 | 0.844 | 0.899 | 0.848 |
| 454 | 0.968 | 0.881 | 0.850 | 0.900 | 0.849 |
| 455 | 0.965 | 0.886 | 0.826 | 0.893 | 0.839 |
| 456 | 0.962 | 0.876 | 0.850 | 0.896 | 0.844 |
| 457 | 0.962 | 0.881 | 0.844 | 0.896 | 0.844 |
| 458 | 0.968 | 0.884 | 0.844 | 0.899 | 0.848 |
| 459 | 0.965 | 0.886 | 0.850 | 0.901 | 0.851 |
| 460 | 0.968 | 0.889 | 0.847 | 0.902 | 0.852 |
| 461 | 0.968 | 0.889 | 0.841 | 0.900 | 0.849 |
| 462 | 0.962 | 0.866 | 0.853 | 0.893 | 0.839 |
| 463 | 0.968 | 0.886 | 0.850 | 0.902 | 0.852 |
| 464 | 0.960 | 0.886 | 0.844 | 0.897 | 0.845 |
| 465 | 0.968 | 0.889 | 0.829 | 0.896 | 0.844 |
| 466 | 0.965 | 0.876 | 0.844 | 0.895 | 0.842 |
| 467 | 0.965 | 0.879 | 0.832 | 0.892 | 0.838 |
| 468 | 0.971 | 0.879 | 0.844 | 0.898 | 0.847 |
| 469 | 0.971 | 0.894 | 0.829 | 0.899 | 0.848 |
| 470 | 0.965 | 0.879 | 0.847 | 0.897 | 0.845 |
| 471 | 0.968 | 0.899 | 0.832 | 0.901 | 0.851 |
| 472 | 0.971 | 0.873 | 0.835 | 0.893 | 0.839 |
| 473 | 0.971 | 0.879 | 0.832 | 0.894 | 0.841 |
| 474 | 0.962 | 0.879 | 0.829 | 0.890 | 0.835 |
| 475 | 0.960 | 0.879 | 0.853 | 0.897 | 0.845 |
| 476 | 0.960 | 0.873 | 0.850 | 0.894 | 0.841 |
| 477 | 0.971 | 0.881 | 0.841 | 0.898 | 0.846 |

|     |       |       |       |       |       |
|-----|-------|-------|-------|-------|-------|
| 478 | 0.965 | 0.884 | 0.841 | 0.897 | 0.845 |
| 479 | 0.968 | 0.879 | 0.844 | 0.897 | 0.845 |
| 480 | 0.962 | 0.884 | 0.847 | 0.898 | 0.846 |
| 481 | 0.968 | 0.889 | 0.844 | 0.901 | 0.851 |
| 482 | 0.968 | 0.876 | 0.832 | 0.892 | 0.838 |
| 483 | 0.965 | 0.873 | 0.847 | 0.895 | 0.842 |
| 484 | 0.968 | 0.881 | 0.838 | 0.896 | 0.844 |
| 485 | 0.968 | 0.868 | 0.853 | 0.896 | 0.844 |
| 486 | 0.965 | 0.884 | 0.853 | 0.901 | 0.851 |
| 487 | 0.968 | 0.891 | 0.838 | 0.900 | 0.849 |
| 488 | 0.960 | 0.879 | 0.853 | 0.897 | 0.845 |
| 489 | 0.965 | 0.889 | 0.835 | 0.897 | 0.845 |
| 490 | 0.971 | 0.884 | 0.847 | 0.901 | 0.851 |
| 491 | 0.968 | 0.886 | 0.841 | 0.899 | 0.848 |
| 492 | 0.965 | 0.881 | 0.838 | 0.895 | 0.842 |
| 493 | 0.960 | 0.873 | 0.841 | 0.891 | 0.837 |
| 494 | 0.965 | 0.879 | 0.853 | 0.899 | 0.848 |
| 495 | 0.968 | 0.891 | 0.841 | 0.901 | 0.851 |
| 496 | 0.968 | 0.884 | 0.853 | 0.902 | 0.852 |
| 497 | 0.962 | 0.884 | 0.841 | 0.896 | 0.844 |
| 498 | 0.965 | 0.889 | 0.832 | 0.896 | 0.844 |
| 499 | 0.965 | 0.868 | 0.841 | 0.891 | 0.837 |
| 500 | 0.962 | 0.873 | 0.841 | 0.892 | 0.838 |
| 501 | 0.965 | 0.876 | 0.844 | 0.895 | 0.842 |
| 502 | 0.962 | 0.886 | 0.838 | 0.896 | 0.844 |
| 503 | 0.962 | 0.879 | 0.832 | 0.891 | 0.837 |
| 504 | 0.965 | 0.881 | 0.841 | 0.896 | 0.844 |
| 505 | 0.960 | 0.889 | 0.847 | 0.899 | 0.848 |
| 506 | 0.954 | 0.889 | 0.853 | 0.899 | 0.848 |
| 507 | 0.965 | 0.884 | 0.844 | 0.898 | 0.846 |
| 508 | 0.960 | 0.879 | 0.847 | 0.895 | 0.842 |
| 509 | 0.965 | 0.894 | 0.847 | 0.903 | 0.853 |
| 510 | 0.971 | 0.891 | 0.841 | 0.902 | 0.852 |
| 511 | 0.954 | 0.897 | 0.844 | 0.899 | 0.848 |
| 512 | 0.960 | 0.884 | 0.835 | 0.893 | 0.839 |
| 513 | 0.962 | 0.889 | 0.841 | 0.898 | 0.846 |
| 514 | 0.957 | 0.881 | 0.847 | 0.895 | 0.842 |
| 515 | 0.960 | 0.881 | 0.841 | 0.894 | 0.841 |
| 516 | 0.968 | 0.871 | 0.835 | 0.891 | 0.837 |
| 517 | 0.960 | 0.881 | 0.847 | 0.896 | 0.844 |
| 518 | 0.965 | 0.871 | 0.838 | 0.891 | 0.837 |
| 519 | 0.960 | 0.873 | 0.853 | 0.895 | 0.842 |

|     |       |       |       |       |       |
|-----|-------|-------|-------|-------|-------|
| 520 | 0.971 | 0.881 | 0.841 | 0.898 | 0.846 |
| 521 | 0.962 | 0.889 | 0.847 | 0.900 | 0.849 |
| 522 | 0.962 | 0.884 | 0.841 | 0.896 | 0.844 |
| 523 | 0.960 | 0.884 | 0.847 | 0.897 | 0.845 |
| 524 | 0.962 | 0.876 | 0.853 | 0.897 | 0.845 |
| 525 | 0.965 | 0.889 | 0.844 | 0.900 | 0.849 |
| 526 | 0.965 | 0.884 | 0.835 | 0.895 | 0.842 |
| 527 | 0.962 | 0.876 | 0.835 | 0.891 | 0.837 |
| 528 | 0.968 | 0.884 | 0.838 | 0.897 | 0.845 |
| 529 | 0.957 | 0.876 | 0.847 | 0.893 | 0.839 |
| 530 | 0.965 | 0.873 | 0.847 | 0.895 | 0.842 |
| 531 | 0.960 | 0.881 | 0.835 | 0.892 | 0.838 |
| 532 | 0.968 | 0.881 | 0.832 | 0.894 | 0.841 |
| 533 | 0.965 | 0.897 | 0.838 | 0.901 | 0.851 |
| 534 | 0.965 | 0.879 | 0.853 | 0.899 | 0.848 |
| 535 | 0.965 | 0.897 | 0.841 | 0.902 | 0.852 |
| 536 | 0.965 | 0.884 | 0.850 | 0.900 | 0.849 |
| 537 | 0.957 | 0.897 | 0.847 | 0.901 | 0.851 |
| 538 | 0.960 | 0.866 | 0.847 | 0.890 | 0.835 |
| 539 | 0.965 | 0.886 | 0.850 | 0.901 | 0.851 |
| 540 | 0.971 | 0.886 | 0.838 | 0.899 | 0.848 |
| 541 | 0.965 | 0.868 | 0.838 | 0.890 | 0.835 |
| 542 | 0.960 | 0.873 | 0.847 | 0.893 | 0.839 |
| 543 | 0.974 | 0.884 | 0.844 | 0.901 | 0.851 |
| 544 | 0.962 | 0.884 | 0.841 | 0.896 | 0.844 |
| 545 | 0.968 | 0.873 | 0.850 | 0.897 | 0.845 |
| 546 | 0.962 | 0.876 | 0.844 | 0.894 | 0.841 |
| 547 | 0.971 | 0.876 | 0.838 | 0.895 | 0.842 |
| 548 | 0.968 | 0.891 | 0.853 | 0.904 | 0.856 |
| 549 | 0.954 | 0.886 | 0.847 | 0.896 | 0.844 |
| 550 | 0.965 | 0.876 | 0.835 | 0.892 | 0.838 |
| 551 | 0.962 | 0.881 | 0.838 | 0.894 | 0.841 |
| 552 | 0.974 | 0.886 | 0.853 | 0.904 | 0.856 |
| 553 | 0.977 | 0.873 | 0.853 | 0.901 | 0.851 |
| 554 | 0.965 | 0.884 | 0.835 | 0.895 | 0.842 |
| 555 | 0.960 | 0.868 | 0.835 | 0.888 | 0.831 |
| 556 | 0.965 | 0.889 | 0.841 | 0.899 | 0.848 |
| 557 | 0.974 | 0.873 | 0.844 | 0.897 | 0.845 |
| 558 | 0.965 | 0.879 | 0.838 | 0.894 | 0.841 |
| 559 | 0.957 | 0.876 | 0.835 | 0.889 | 0.834 |
| 560 | 0.962 | 0.876 | 0.841 | 0.893 | 0.839 |
| 561 | 0.965 | 0.881 | 0.835 | 0.894 | 0.841 |

|     |       |       |       |       |       |
|-----|-------|-------|-------|-------|-------|
| 562 | 0.965 | 0.886 | 0.844 | 0.899 | 0.848 |
| 563 | 0.968 | 0.886 | 0.832 | 0.896 | 0.844 |
| 564 | 0.971 | 0.886 | 0.832 | 0.897 | 0.845 |
| 565 | 0.962 | 0.884 | 0.838 | 0.895 | 0.842 |
| 566 | 0.965 | 0.881 | 0.841 | 0.896 | 0.844 |
| 567 | 0.971 | 0.889 | 0.826 | 0.896 | 0.844 |
| 568 | 0.965 | 0.884 | 0.832 | 0.894 | 0.841 |
| 569 | 0.962 | 0.881 | 0.844 | 0.896 | 0.844 |
| 570 | 0.960 | 0.866 | 0.844 | 0.889 | 0.834 |
| 571 | 0.962 | 0.881 | 0.826 | 0.890 | 0.835 |
| 572 | 0.974 | 0.886 | 0.847 | 0.903 | 0.854 |
| 573 | 0.962 | 0.876 | 0.841 | 0.893 | 0.839 |
| 574 | 0.968 | 0.879 | 0.844 | 0.897 | 0.845 |
| 575 | 0.965 | 0.860 | 0.844 | 0.889 | 0.834 |
| 576 | 0.962 | 0.886 | 0.844 | 0.898 | 0.846 |
| 577 | 0.971 | 0.881 | 0.832 | 0.895 | 0.842 |
| 578 | 0.971 | 0.873 | 0.844 | 0.896 | 0.844 |
| 579 | 0.974 | 0.876 | 0.829 | 0.893 | 0.839 |
| 580 | 0.968 | 0.884 | 0.847 | 0.900 | 0.849 |
| 581 | 0.980 | 0.876 | 0.826 | 0.894 | 0.841 |
| 582 | 0.965 | 0.871 | 0.838 | 0.891 | 0.837 |
| 583 | 0.968 | 0.866 | 0.841 | 0.891 | 0.837 |
| 584 | 0.965 | 0.879 | 0.832 | 0.892 | 0.838 |
| 585 | 0.962 | 0.876 | 0.838 | 0.892 | 0.838 |
| 586 | 0.965 | 0.881 | 0.823 | 0.890 | 0.835 |
| 587 | 0.962 | 0.889 | 0.832 | 0.895 | 0.842 |
| 588 | 0.965 | 0.889 | 0.847 | 0.901 | 0.851 |
| 589 | 0.974 | 0.879 | 0.838 | 0.897 | 0.845 |
| 590 | 0.965 | 0.879 | 0.850 | 0.898 | 0.846 |
| 591 | 0.968 | 0.881 | 0.826 | 0.892 | 0.838 |
| 592 | 0.971 | 0.889 | 0.838 | 0.900 | 0.849 |
| 593 | 0.968 | 0.876 | 0.844 | 0.896 | 0.844 |
| 594 | 0.974 | 0.876 | 0.841 | 0.897 | 0.845 |
| 595 | 0.957 | 0.876 | 0.832 | 0.888 | 0.832 |
| 596 | 0.974 | 0.879 | 0.835 | 0.896 | 0.844 |
| 597 | 0.977 | 0.876 | 0.835 | 0.896 | 0.844 |
| 598 | 0.965 | 0.881 | 0.835 | 0.894 | 0.841 |
| 599 | 0.968 | 0.871 | 0.844 | 0.894 | 0.841 |
| 600 | 0.974 | 0.884 | 0.826 | 0.895 | 0.842 |
| 601 | 0.965 | 0.879 | 0.844 | 0.896 | 0.844 |
| 602 | 0.971 | 0.873 | 0.850 | 0.898 | 0.846 |
| 603 | 0.971 | 0.871 | 0.844 | 0.895 | 0.842 |

|     |       |       |       |       |       |
|-----|-------|-------|-------|-------|-------|
| 604 | 0.971 | 0.876 | 0.847 | 0.898 | 0.846 |
| 605 | 0.971 | 0.881 | 0.838 | 0.897 | 0.845 |
| 606 | 0.965 | 0.868 | 0.835 | 0.889 | 0.834 |
| 607 | 0.968 | 0.876 | 0.838 | 0.894 | 0.841 |
| 608 | 0.974 | 0.871 | 0.838 | 0.894 | 0.841 |
| 609 | 0.974 | 0.873 | 0.844 | 0.897 | 0.845 |
| 610 | 0.965 | 0.871 | 0.844 | 0.893 | 0.839 |
| 611 | 0.971 | 0.873 | 0.838 | 0.894 | 0.841 |
| 612 | 0.965 | 0.873 | 0.841 | 0.893 | 0.839 |
| 613 | 0.971 | 0.868 | 0.847 | 0.895 | 0.842 |
| 614 | 0.974 | 0.871 | 0.844 | 0.896 | 0.844 |
| 615 | 0.962 | 0.886 | 0.835 | 0.895 | 0.842 |
| 616 | 0.974 | 0.876 | 0.832 | 0.894 | 0.841 |
| 617 | 0.968 | 0.871 | 0.850 | 0.896 | 0.844 |
| 618 | 0.965 | 0.886 | 0.838 | 0.897 | 0.845 |
| 619 | 0.971 | 0.879 | 0.829 | 0.893 | 0.839 |
| 620 | 0.971 | 0.868 | 0.832 | 0.890 | 0.835 |
| 621 | 0.971 | 0.876 | 0.838 | 0.895 | 0.842 |
| 622 | 0.968 | 0.876 | 0.838 | 0.894 | 0.841 |
| 623 | 0.977 | 0.858 | 0.850 | 0.894 | 0.841 |
| 624 | 0.971 | 0.884 | 0.859 | 0.904 | 0.856 |
| 625 | 0.965 | 0.881 | 0.835 | 0.894 | 0.841 |
| 626 | 0.965 | 0.873 | 0.844 | 0.894 | 0.841 |
| 627 | 0.971 | 0.884 | 0.826 | 0.894 | 0.841 |
| 628 | 0.965 | 0.879 | 0.829 | 0.891 | 0.837 |
| 629 | 0.974 | 0.881 | 0.838 | 0.898 | 0.846 |
| 630 | 0.965 | 0.884 | 0.835 | 0.895 | 0.842 |
| 631 | 0.974 | 0.884 | 0.838 | 0.899 | 0.848 |
| 632 | 0.977 | 0.884 | 0.832 | 0.898 | 0.847 |
| 633 | 0.974 | 0.876 | 0.841 | 0.897 | 0.845 |
| 634 | 0.968 | 0.876 | 0.838 | 0.894 | 0.841 |
| 635 | 0.971 | 0.881 | 0.826 | 0.893 | 0.839 |
| 636 | 0.965 | 0.868 | 0.832 | 0.888 | 0.832 |
| 637 | 0.971 | 0.889 | 0.835 | 0.899 | 0.848 |
| 638 | 0.971 | 0.894 | 0.835 | 0.901 | 0.851 |
| 639 | 0.971 | 0.863 | 0.829 | 0.888 | 0.831 |
| 640 | 0.968 | 0.871 | 0.829 | 0.889 | 0.834 |
| 641 | 0.962 | 0.871 | 0.820 | 0.885 | 0.827 |
| 642 | 0.971 | 0.879 | 0.844 | 0.898 | 0.846 |
| 643 | 0.971 | 0.879 | 0.841 | 0.897 | 0.845 |
| 644 | 0.965 | 0.871 | 0.838 | 0.891 | 0.837 |
| 645 | 0.974 | 0.879 | 0.817 | 0.890 | 0.835 |

|     |       |       |       |       |       |
|-----|-------|-------|-------|-------|-------|
| 646 | 0.974 | 0.894 | 0.835 | 0.902 | 0.852 |
| 647 | 0.971 | 0.876 | 0.835 | 0.894 | 0.841 |
| 648 | 0.974 | 0.873 | 0.829 | 0.892 | 0.838 |
| 649 | 0.965 | 0.879 | 0.835 | 0.893 | 0.839 |
| 650 | 0.965 | 0.879 | 0.838 | 0.894 | 0.841 |
| 651 | 0.971 | 0.879 | 0.835 | 0.895 | 0.842 |
| 652 | 0.971 | 0.879 | 0.832 | 0.894 | 0.841 |
| 653 | 0.974 | 0.879 | 0.835 | 0.896 | 0.844 |
| 654 | 0.962 | 0.873 | 0.835 | 0.890 | 0.835 |
| 655 | 0.965 | 0.876 | 0.829 | 0.890 | 0.835 |
| 656 | 0.971 | 0.881 | 0.835 | 0.896 | 0.844 |
| 657 | 0.968 | 0.879 | 0.835 | 0.894 | 0.841 |
| 658 | 0.962 | 0.881 | 0.835 | 0.893 | 0.839 |
| 659 | 0.971 | 0.868 | 0.841 | 0.893 | 0.839 |
| 660 | 0.968 | 0.886 | 0.844 | 0.900 | 0.849 |
| 661 | 0.965 | 0.866 | 0.829 | 0.887 | 0.830 |
| 662 | 0.971 | 0.873 | 0.838 | 0.894 | 0.841 |
| 663 | 0.965 | 0.879 | 0.844 | 0.896 | 0.844 |
| 664 | 0.971 | 0.863 | 0.838 | 0.890 | 0.835 |
| 665 | 0.977 | 0.863 | 0.835 | 0.891 | 0.837 |
| 666 | 0.962 | 0.863 | 0.838 | 0.888 | 0.831 |
| 667 | 0.965 | 0.868 | 0.841 | 0.891 | 0.837 |
| 668 | 0.962 | 0.868 | 0.838 | 0.889 | 0.834 |
| 669 | 0.974 | 0.886 | 0.844 | 0.902 | 0.852 |
| 670 | 0.968 | 0.871 | 0.841 | 0.893 | 0.839 |
| 671 | 0.965 | 0.873 | 0.841 | 0.893 | 0.839 |
| 672 | 0.974 | 0.889 | 0.829 | 0.898 | 0.846 |
| 673 | 0.962 | 0.879 | 0.841 | 0.894 | 0.841 |
| 674 | 0.962 | 0.871 | 0.829 | 0.888 | 0.831 |
| 675 | 0.980 | 0.866 | 0.847 | 0.897 | 0.845 |
| 676 | 0.971 | 0.873 | 0.835 | 0.893 | 0.839 |
| 677 | 0.971 | 0.886 | 0.847 | 0.902 | 0.852 |
| 678 | 0.971 | 0.884 | 0.829 | 0.895 | 0.842 |
| 679 | 0.962 | 0.868 | 0.829 | 0.887 | 0.830 |
| 680 | 0.965 | 0.876 | 0.838 | 0.893 | 0.839 |
| 681 | 0.980 | 0.871 | 0.847 | 0.899 | 0.848 |
| 682 | 0.974 | 0.876 | 0.838 | 0.896 | 0.844 |
| 683 | 0.974 | 0.886 | 0.838 | 0.900 | 0.849 |
| 684 | 0.965 | 0.873 | 0.847 | 0.895 | 0.842 |
| 685 | 0.971 | 0.866 | 0.835 | 0.890 | 0.835 |
| 686 | 0.962 | 0.868 | 0.832 | 0.888 | 0.831 |
| 687 | 0.974 | 0.871 | 0.832 | 0.892 | 0.838 |

|     |       |       |       |       |       |
|-----|-------|-------|-------|-------|-------|
| 688 | 0.965 | 0.881 | 0.838 | 0.895 | 0.842 |
| 689 | 0.962 | 0.871 | 0.841 | 0.891 | 0.837 |
| 690 | 0.968 | 0.884 | 0.829 | 0.894 | 0.841 |
| 691 | 0.965 | 0.886 | 0.841 | 0.898 | 0.846 |
| 692 | 0.962 | 0.879 | 0.841 | 0.894 | 0.841 |
| 693 | 0.965 | 0.881 | 0.838 | 0.895 | 0.842 |
| 694 | 0.974 | 0.879 | 0.853 | 0.902 | 0.852 |
| 695 | 0.971 | 0.871 | 0.823 | 0.888 | 0.832 |
| 696 | 0.965 | 0.881 | 0.826 | 0.891 | 0.837 |
| 697 | 0.960 | 0.876 | 0.835 | 0.890 | 0.835 |
| 698 | 0.968 | 0.881 | 0.841 | 0.897 | 0.845 |
| 699 | 0.974 | 0.873 | 0.823 | 0.890 | 0.835 |
| 700 | 0.971 | 0.879 | 0.838 | 0.896 | 0.844 |
| 701 | 0.968 | 0.889 | 0.832 | 0.897 | 0.845 |
| 702 | 0.968 | 0.876 | 0.850 | 0.898 | 0.846 |
| 703 | 0.968 | 0.876 | 0.841 | 0.895 | 0.842 |
| 704 | 0.965 | 0.879 | 0.832 | 0.892 | 0.838 |
| 705 | 0.974 | 0.871 | 0.832 | 0.892 | 0.838 |
| 706 | 0.965 | 0.868 | 0.835 | 0.889 | 0.834 |
| 707 | 0.968 | 0.881 | 0.841 | 0.897 | 0.845 |
| 708 | 0.968 | 0.886 | 0.832 | 0.896 | 0.844 |
| 709 | 0.968 | 0.863 | 0.829 | 0.887 | 0.830 |
| 710 | 0.965 | 0.871 | 0.850 | 0.895 | 0.842 |
| 711 | 0.974 | 0.873 | 0.844 | 0.897 | 0.845 |
| 712 | 0.968 | 0.866 | 0.844 | 0.892 | 0.838 |
| 713 | 0.977 | 0.879 | 0.835 | 0.897 | 0.845 |
| 714 | 0.971 | 0.871 | 0.844 | 0.895 | 0.842 |
| 715 | 0.968 | 0.858 | 0.841 | 0.888 | 0.832 |
| 716 | 0.968 | 0.866 | 0.841 | 0.891 | 0.837 |
| 717 | 0.968 | 0.884 | 0.826 | 0.893 | 0.839 |
| 718 | 0.962 | 0.881 | 0.841 | 0.895 | 0.842 |
| 719 | 0.962 | 0.876 | 0.826 | 0.888 | 0.832 |
| 720 | 0.968 | 0.876 | 0.826 | 0.890 | 0.835 |
| 721 | 0.962 | 0.881 | 0.826 | 0.890 | 0.835 |
| 722 | 0.974 | 0.879 | 0.835 | 0.896 | 0.844 |
| 723 | 0.968 | 0.884 | 0.844 | 0.899 | 0.848 |
| 724 | 0.974 | 0.860 | 0.844 | 0.892 | 0.838 |
| 725 | 0.974 | 0.884 | 0.844 | 0.901 | 0.851 |
| 726 | 0.957 | 0.881 | 0.838 | 0.892 | 0.838 |
| 727 | 0.971 | 0.886 | 0.847 | 0.902 | 0.852 |
| 728 | 0.965 | 0.866 | 0.844 | 0.891 | 0.837 |
| 729 | 0.968 | 0.866 | 0.838 | 0.890 | 0.835 |



|     |       |       |       |       |       |
|-----|-------|-------|-------|-------|-------|
| 730 | 0.954 | 0.879 | 0.829 | 0.888 | 0.831 |
| 731 | 0.957 | 0.881 | 0.844 | 0.894 | 0.841 |
| 732 | 0.960 | 0.886 | 0.823 | 0.890 | 0.835 |
| 733 | 0.965 | 0.876 | 0.829 | 0.890 | 0.835 |
| 734 | 0.960 | 0.871 | 0.829 | 0.887 | 0.830 |
| 735 | 0.962 | 0.884 | 0.847 | 0.898 | 0.846 |
| 736 | 0.962 | 0.876 | 0.832 | 0.890 | 0.835 |
| 737 | 0.965 | 0.871 | 0.823 | 0.887 | 0.830 |
| 738 | 0.960 | 0.871 | 0.835 | 0.888 | 0.832 |
| 739 | 0.968 | 0.868 | 0.841 | 0.892 | 0.838 |
| 740 | 0.968 | 0.881 | 0.841 | 0.897 | 0.845 |
| 741 | 0.962 | 0.879 | 0.838 | 0.893 | 0.839 |
| 742 | 0.957 | 0.884 | 0.826 | 0.889 | 0.834 |
| 743 | 0.960 | 0.884 | 0.832 | 0.892 | 0.838 |
| 744 | 0.962 | 0.884 | 0.838 | 0.895 | 0.842 |
| 745 | 0.962 | 0.881 | 0.838 | 0.894 | 0.841 |
| 746 | 0.962 | 0.879 | 0.841 | 0.894 | 0.841 |
| 747 | 0.965 | 0.886 | 0.838 | 0.897 | 0.845 |
| 748 | 0.962 | 0.884 | 0.838 | 0.895 | 0.842 |
| 749 | 0.962 | 0.866 | 0.847 | 0.891 | 0.837 |
| 750 | 0.962 | 0.868 | 0.835 | 0.888 | 0.832 |
| 751 | 0.962 | 0.879 | 0.832 | 0.891 | 0.837 |
| 752 | 0.971 | 0.876 | 0.832 | 0.893 | 0.839 |
| 753 | 0.968 | 0.863 | 0.838 | 0.889 | 0.834 |
| 754 | 0.960 | 0.881 | 0.835 | 0.892 | 0.838 |
| 755 | 0.954 | 0.876 | 0.853 | 0.894 | 0.841 |
| 756 | 0.968 | 0.868 | 0.832 | 0.889 | 0.834 |
| 757 | 0.965 | 0.868 | 0.844 | 0.892 | 0.838 |
| 758 | 0.962 | 0.855 | 0.829 | 0.882 | 0.823 |
| 759 | 0.965 | 0.876 | 0.838 | 0.893 | 0.839 |
| 760 | 0.965 | 0.881 | 0.826 | 0.891 | 0.837 |
| 761 | 0.962 | 0.873 | 0.835 | 0.890 | 0.835 |
| 762 | 0.977 | 0.879 | 0.832 | 0.896 | 0.844 |
| 763 | 0.965 | 0.876 | 0.838 | 0.893 | 0.839 |
| 764 | 0.960 | 0.876 | 0.844 | 0.893 | 0.839 |
| 765 | 0.971 | 0.879 | 0.835 | 0.895 | 0.842 |
| 766 | 0.965 | 0.873 | 0.853 | 0.897 | 0.845 |
| 767 | 0.968 | 0.871 | 0.820 | 0.887 | 0.830 |
| 768 | 0.965 | 0.858 | 0.829 | 0.884 | 0.825 |
| 769 | 0.968 | 0.871 | 0.844 | 0.894 | 0.841 |
| 770 | 0.965 | 0.868 | 0.844 | 0.892 | 0.838 |
| 771 | 0.954 | 0.879 | 0.841 | 0.891 | 0.837 |

|     |       |       |       |       |       |
|-----|-------|-------|-------|-------|-------|
| 772 | 0.957 | 0.860 | 0.826 | 0.881 | 0.821 |
| 773 | 0.968 | 0.868 | 0.838 | 0.891 | 0.837 |
| 774 | 0.971 | 0.876 | 0.829 | 0.892 | 0.838 |
| 775 | 0.971 | 0.871 | 0.838 | 0.893 | 0.839 |
| 776 | 0.974 | 0.876 | 0.832 | 0.894 | 0.841 |
| 777 | 0.971 | 0.868 | 0.835 | 0.891 | 0.837 |
| 778 | 0.962 | 0.871 | 0.838 | 0.890 | 0.835 |
| 779 | 0.960 | 0.871 | 0.832 | 0.888 | 0.831 |
| 780 | 0.968 | 0.873 | 0.832 | 0.891 | 0.837 |
| 781 | 0.968 | 0.881 | 0.853 | 0.901 | 0.851 |
| 782 | 0.957 | 0.871 | 0.838 | 0.888 | 0.832 |
| 783 | 0.965 | 0.873 | 0.826 | 0.888 | 0.832 |
| 784 | 0.960 | 0.873 | 0.826 | 0.887 | 0.830 |
| 785 | 0.960 | 0.876 | 0.829 | 0.888 | 0.832 |
| 786 | 0.960 | 0.866 | 0.838 | 0.888 | 0.831 |
| 787 | 0.962 | 0.873 | 0.841 | 0.892 | 0.838 |
| 788 | 0.960 | 0.866 | 0.841 | 0.888 | 0.832 |

(4) Performance of SVM on top features yielded by three feature selection methods

| <b>mRMR</b>                |           |             |          |            |            |
|----------------------------|-----------|-------------|----------|------------|------------|
| <b>Numbers of features</b> | <b>G1</b> | <b>G2/M</b> | <b>S</b> | <b>ACC</b> | <b>MCC</b> |
| 1                          | 0.951     | 0.641       | 0.695    | 0.758      | 0.641      |
| 2                          | 0.957     | 0.879       | 0.659    | 0.835      | 0.754      |
| 3                          | 0.957     | 0.871       | 0.683    | 0.840      | 0.761      |
| 4                          | 0.954     | 0.876       | 0.692    | 0.843      | 0.766      |
| 5                          | 0.957     | 0.866       | 0.698    | 0.843      | 0.764      |
| 6                          | 0.957     | 0.863       | 0.713    | 0.846      | 0.770      |
| 7                          | 0.960     | 0.860       | 0.710    | 0.845      | 0.768      |
| 8                          | 0.957     | 0.840       | 0.710    | 0.837      | 0.755      |
| 9                          | 0.960     | 0.853       | 0.701    | 0.840      | 0.760      |
| 10                         | 0.962     | 0.824       | 0.740    | 0.843      | 0.763      |
| 11                         | 0.962     | 0.824       | 0.740    | 0.843      | 0.763      |
| 12                         | 0.962     | 0.835       | 0.751    | 0.850      | 0.775      |
| 13                         | 0.962     | 0.832       | 0.751    | 0.849      | 0.773      |
| 14                         | 0.962     | 0.835       | 0.757    | 0.852      | 0.778      |
| 15                         | 0.954     | 0.809       | 0.790    | 0.850      | 0.775      |
| 16                         | 0.954     | 0.804       | 0.787    | 0.847      | 0.771      |
| 17                         | 0.951     | 0.804       | 0.799    | 0.850      | 0.775      |
| 18                         | 0.954     | 0.804       | 0.796    | 0.850      | 0.775      |
| 19                         | 0.957     | 0.809       | 0.796    | 0.853      | 0.779      |
| 20                         | 0.960     | 0.811       | 0.793    | 0.854      | 0.781      |
| 21                         | 0.962     | 0.811       | 0.796    | 0.856      | 0.784      |
| 22                         | 0.960     | 0.814       | 0.805    | 0.858      | 0.788      |

|    |       |       |       |       |       |
|----|-------|-------|-------|-------|-------|
| 23 | 0.980 | 0.788 | 0.826 | 0.862 | 0.795 |
| 24 | 0.980 | 0.788 | 0.826 | 0.862 | 0.795 |
| 25 | 0.980 | 0.788 | 0.826 | 0.862 | 0.795 |
| 26 | 0.980 | 0.793 | 0.817 | 0.861 | 0.793 |
| 27 | 0.980 | 0.791 | 0.820 | 0.861 | 0.793 |
| 28 | 0.977 | 0.824 | 0.814 | 0.871 | 0.806 |
| 29 | 0.977 | 0.824 | 0.814 | 0.871 | 0.806 |
| 30 | 0.977 | 0.824 | 0.814 | 0.871 | 0.806 |
| 31 | 0.977 | 0.822 | 0.811 | 0.869 | 0.803 |
| 32 | 0.980 | 0.824 | 0.814 | 0.872 | 0.807 |
| 33 | 0.980 | 0.824 | 0.808 | 0.870 | 0.805 |
| 34 | 0.977 | 0.827 | 0.814 | 0.872 | 0.807 |
| 35 | 0.977 | 0.845 | 0.805 | 0.875 | 0.813 |
| 36 | 0.971 | 0.860 | 0.814 | 0.882 | 0.823 |
| 37 | 0.971 | 0.858 | 0.808 | 0.879 | 0.818 |
| 38 | 0.971 | 0.858 | 0.805 | 0.878 | 0.817 |
| 39 | 0.974 | 0.858 | 0.808 | 0.880 | 0.820 |
| 40 | 0.974 | 0.858 | 0.808 | 0.880 | 0.820 |
| 41 | 0.974 | 0.858 | 0.808 | 0.880 | 0.820 |
| 42 | 0.974 | 0.858 | 0.805 | 0.879 | 0.818 |
| 43 | 0.977 | 0.855 | 0.814 | 0.882 | 0.823 |
| 44 | 0.977 | 0.855 | 0.817 | 0.883 | 0.824 |
| 45 | 0.977 | 0.855 | 0.808 | 0.880 | 0.820 |
| 46 | 0.974 | 0.855 | 0.802 | 0.877 | 0.815 |
| 47 | 0.977 | 0.855 | 0.799 | 0.877 | 0.815 |
| 48 | 0.977 | 0.855 | 0.802 | 0.878 | 0.817 |
| 49 | 0.977 | 0.855 | 0.802 | 0.878 | 0.817 |
| 50 | 0.977 | 0.855 | 0.799 | 0.877 | 0.815 |
| 51 | 0.977 | 0.855 | 0.799 | 0.877 | 0.815 |
| 52 | 0.977 | 0.855 | 0.802 | 0.878 | 0.817 |
| 53 | 0.977 | 0.845 | 0.811 | 0.877 | 0.816 |
| 54 | 0.977 | 0.845 | 0.808 | 0.876 | 0.814 |
| 55 | 0.977 | 0.855 | 0.802 | 0.878 | 0.817 |
| 56 | 0.977 | 0.853 | 0.802 | 0.877 | 0.816 |
| 57 | 0.977 | 0.853 | 0.802 | 0.877 | 0.816 |
| 58 | 0.974 | 0.855 | 0.811 | 0.880 | 0.820 |
| 59 | 0.974 | 0.855 | 0.811 | 0.880 | 0.820 |
| 60 | 0.974 | 0.858 | 0.811 | 0.881 | 0.821 |
| 61 | 0.974 | 0.863 | 0.808 | 0.882 | 0.823 |
| 62 | 0.980 | 0.837 | 0.817 | 0.877 | 0.816 |
| 63 | 0.980 | 0.837 | 0.817 | 0.877 | 0.816 |
| 64 | 0.980 | 0.837 | 0.817 | 0.877 | 0.816 |

|     |       |       |       |       |       |
|-----|-------|-------|-------|-------|-------|
| 65  | 0.980 | 0.837 | 0.820 | 0.878 | 0.817 |
| 66  | 0.977 | 0.853 | 0.817 | 0.882 | 0.823 |
| 67  | 0.986 | 0.850 | 0.811 | 0.882 | 0.823 |
| 68  | 0.986 | 0.850 | 0.811 | 0.882 | 0.823 |
| 69  | 0.991 | 0.804 | 0.844 | 0.877 | 0.817 |
| 70  | 0.991 | 0.814 | 0.844 | 0.881 | 0.822 |
| 71  | 0.991 | 0.814 | 0.844 | 0.881 | 0.822 |
| 72  | 0.991 | 0.814 | 0.844 | 0.881 | 0.822 |
| 73  | 0.991 | 0.817 | 0.844 | 0.882 | 0.824 |
| 74  | 0.991 | 0.817 | 0.844 | 0.882 | 0.824 |
| 75  | 0.991 | 0.819 | 0.844 | 0.883 | 0.825 |
| 76  | 0.991 | 0.819 | 0.844 | 0.883 | 0.825 |
| 77  | 0.991 | 0.819 | 0.844 | 0.883 | 0.825 |
| 78  | 0.991 | 0.819 | 0.844 | 0.883 | 0.825 |
| 79  | 0.988 | 0.819 | 0.844 | 0.882 | 0.824 |
| 80  | 0.988 | 0.819 | 0.844 | 0.882 | 0.824 |
| 81  | 0.988 | 0.819 | 0.844 | 0.882 | 0.824 |
| 82  | 0.988 | 0.819 | 0.844 | 0.882 | 0.824 |
| 83  | 0.988 | 0.819 | 0.844 | 0.882 | 0.824 |
| 84  | 0.988 | 0.814 | 0.835 | 0.877 | 0.817 |
| 85  | 0.988 | 0.814 | 0.835 | 0.877 | 0.817 |
| 86  | 0.988 | 0.814 | 0.838 | 0.878 | 0.818 |
| 87  | 0.988 | 0.814 | 0.838 | 0.878 | 0.818 |
| 88  | 0.988 | 0.806 | 0.835 | 0.874 | 0.813 |
| 89  | 0.988 | 0.806 | 0.835 | 0.874 | 0.813 |
| 90  | 0.988 | 0.806 | 0.835 | 0.874 | 0.813 |
| 91  | 0.988 | 0.817 | 0.838 | 0.879 | 0.819 |
| 92  | 0.988 | 0.811 | 0.838 | 0.877 | 0.817 |
| 93  | 0.988 | 0.811 | 0.838 | 0.877 | 0.817 |
| 94  | 0.988 | 0.811 | 0.838 | 0.877 | 0.817 |
| 95  | 0.988 | 0.817 | 0.832 | 0.877 | 0.816 |
| 96  | 0.988 | 0.824 | 0.835 | 0.881 | 0.822 |
| 97  | 0.988 | 0.822 | 0.835 | 0.880 | 0.821 |
| 98  | 0.988 | 0.824 | 0.835 | 0.881 | 0.822 |
| 99  | 0.988 | 0.824 | 0.835 | 0.881 | 0.822 |
| 100 | 0.988 | 0.824 | 0.835 | 0.881 | 0.822 |
| 101 | 0.988 | 0.824 | 0.835 | 0.881 | 0.822 |
| 102 | 0.988 | 0.824 | 0.835 | 0.881 | 0.822 |
| 103 | 0.988 | 0.824 | 0.835 | 0.881 | 0.822 |
| 104 | 0.988 | 0.822 | 0.835 | 0.880 | 0.821 |
| 105 | 0.988 | 0.822 | 0.835 | 0.880 | 0.821 |
| 106 | 0.988 | 0.822 | 0.835 | 0.880 | 0.821 |

|     |       |       |       |       |       |
|-----|-------|-------|-------|-------|-------|
| 107 | 0.988 | 0.817 | 0.835 | 0.878 | 0.818 |
| 108 | 0.988 | 0.822 | 0.835 | 0.880 | 0.821 |
| 109 | 0.988 | 0.822 | 0.835 | 0.880 | 0.821 |
| 110 | 0.988 | 0.814 | 0.835 | 0.877 | 0.817 |
| 111 | 0.988 | 0.814 | 0.835 | 0.877 | 0.817 |
| 112 | 0.988 | 0.814 | 0.835 | 0.877 | 0.817 |
| 113 | 0.988 | 0.814 | 0.835 | 0.877 | 0.817 |
| 114 | 0.988 | 0.814 | 0.835 | 0.877 | 0.817 |
| 115 | 0.988 | 0.814 | 0.835 | 0.877 | 0.817 |
| 116 | 0.988 | 0.814 | 0.835 | 0.877 | 0.817 |
| 117 | 0.988 | 0.814 | 0.835 | 0.877 | 0.817 |
| 118 | 0.988 | 0.814 | 0.835 | 0.877 | 0.817 |
| 119 | 0.988 | 0.814 | 0.835 | 0.877 | 0.817 |
| 120 | 0.988 | 0.817 | 0.835 | 0.878 | 0.818 |
| 121 | 0.988 | 0.822 | 0.844 | 0.883 | 0.825 |
| 122 | 0.988 | 0.822 | 0.844 | 0.883 | 0.825 |
| 123 | 0.988 | 0.822 | 0.844 | 0.883 | 0.825 |
| 124 | 0.988 | 0.824 | 0.844 | 0.884 | 0.826 |
| 125 | 0.988 | 0.824 | 0.844 | 0.884 | 0.826 |
| 126 | 0.988 | 0.817 | 0.844 | 0.881 | 0.822 |
| 127 | 0.988 | 0.814 | 0.844 | 0.880 | 0.821 |
| 128 | 0.980 | 0.765 | 0.856 | 0.863 | 0.798 |
| 129 | 0.980 | 0.765 | 0.856 | 0.863 | 0.798 |
| 130 | 0.980 | 0.765 | 0.856 | 0.863 | 0.798 |
| 131 | 0.980 | 0.765 | 0.856 | 0.863 | 0.798 |
| 132 | 0.980 | 0.767 | 0.856 | 0.864 | 0.799 |
| 133 | 0.980 | 0.767 | 0.856 | 0.864 | 0.799 |
| 134 | 0.980 | 0.765 | 0.856 | 0.863 | 0.798 |
| 135 | 0.983 | 0.775 | 0.853 | 0.867 | 0.803 |
| 136 | 0.980 | 0.791 | 0.844 | 0.869 | 0.805 |
| 137 | 0.980 | 0.791 | 0.844 | 0.869 | 0.805 |
| 138 | 0.980 | 0.791 | 0.844 | 0.869 | 0.805 |
| 139 | 0.980 | 0.791 | 0.844 | 0.869 | 0.805 |
| 140 | 0.980 | 0.791 | 0.844 | 0.869 | 0.805 |
| 141 | 0.980 | 0.791 | 0.844 | 0.869 | 0.805 |
| 142 | 0.980 | 0.791 | 0.844 | 0.869 | 0.805 |
| 143 | 0.980 | 0.791 | 0.844 | 0.869 | 0.805 |
| 144 | 0.980 | 0.791 | 0.844 | 0.869 | 0.805 |
| 145 | 0.980 | 0.791 | 0.844 | 0.869 | 0.805 |
| 146 | 0.980 | 0.791 | 0.844 | 0.869 | 0.805 |
| 147 | 0.980 | 0.791 | 0.844 | 0.869 | 0.805 |
| 148 | 0.980 | 0.791 | 0.844 | 0.869 | 0.805 |

|     |       |       |       |       |       |
|-----|-------|-------|-------|-------|-------|
| 149 | 0.980 | 0.791 | 0.844 | 0.869 | 0.805 |
| 150 | 0.980 | 0.791 | 0.844 | 0.869 | 0.805 |
| 151 | 0.980 | 0.791 | 0.844 | 0.869 | 0.805 |
| 152 | 0.980 | 0.791 | 0.844 | 0.869 | 0.805 |
| 153 | 0.980 | 0.791 | 0.844 | 0.869 | 0.805 |
| 154 | 0.980 | 0.791 | 0.844 | 0.869 | 0.805 |
| 155 | 0.980 | 0.791 | 0.844 | 0.869 | 0.805 |
| 156 | 0.980 | 0.791 | 0.844 | 0.869 | 0.805 |
| 157 | 0.980 | 0.791 | 0.844 | 0.869 | 0.805 |
| 158 | 0.980 | 0.791 | 0.844 | 0.869 | 0.805 |
| 159 | 0.980 | 0.791 | 0.844 | 0.869 | 0.805 |
| 160 | 0.980 | 0.791 | 0.844 | 0.869 | 0.805 |
| 161 | 0.980 | 0.801 | 0.835 | 0.870 | 0.805 |
| 162 | 0.980 | 0.801 | 0.835 | 0.870 | 0.805 |
| 163 | 0.983 | 0.801 | 0.835 | 0.871 | 0.807 |
| 164 | 0.983 | 0.801 | 0.835 | 0.871 | 0.807 |
| 165 | 0.983 | 0.804 | 0.835 | 0.872 | 0.808 |
| 166 | 0.983 | 0.804 | 0.835 | 0.872 | 0.808 |
| 167 | 0.986 | 0.804 | 0.832 | 0.872 | 0.808 |
| 168 | 0.986 | 0.804 | 0.832 | 0.872 | 0.808 |
| 169 | 0.986 | 0.809 | 0.832 | 0.873 | 0.811 |
| 170 | 0.986 | 0.809 | 0.832 | 0.873 | 0.811 |
| 171 | 0.986 | 0.809 | 0.832 | 0.873 | 0.811 |
| 172 | 0.986 | 0.809 | 0.832 | 0.873 | 0.811 |
| 173 | 0.986 | 0.809 | 0.832 | 0.873 | 0.811 |
| 174 | 0.986 | 0.809 | 0.835 | 0.874 | 0.812 |
| 175 | 0.986 | 0.806 | 0.835 | 0.873 | 0.811 |
| 176 | 0.986 | 0.809 | 0.835 | 0.874 | 0.812 |
| 177 | 0.986 | 0.806 | 0.835 | 0.873 | 0.811 |
| 178 | 0.986 | 0.804 | 0.835 | 0.873 | 0.810 |
| 179 | 0.986 | 0.806 | 0.835 | 0.873 | 0.811 |
| 180 | 0.986 | 0.806 | 0.835 | 0.873 | 0.811 |
| 181 | 0.986 | 0.804 | 0.835 | 0.873 | 0.810 |
| 182 | 0.986 | 0.809 | 0.835 | 0.874 | 0.812 |
| 183 | 0.986 | 0.809 | 0.835 | 0.874 | 0.812 |
| 184 | 0.986 | 0.809 | 0.835 | 0.874 | 0.812 |
| 185 | 0.986 | 0.809 | 0.835 | 0.874 | 0.812 |
| 186 | 0.986 | 0.809 | 0.835 | 0.874 | 0.812 |
| 187 | 0.986 | 0.809 | 0.835 | 0.874 | 0.812 |
| 188 | 0.986 | 0.809 | 0.835 | 0.874 | 0.812 |
| 189 | 0.986 | 0.804 | 0.835 | 0.873 | 0.810 |
| 190 | 0.986 | 0.804 | 0.835 | 0.873 | 0.810 |

|     |       |       |       |       |       |
|-----|-------|-------|-------|-------|-------|
| 191 | 0.986 | 0.804 | 0.835 | 0.873 | 0.810 |
| 192 | 0.986 | 0.804 | 0.835 | 0.873 | 0.810 |
| 193 | 0.986 | 0.804 | 0.835 | 0.873 | 0.810 |
| 194 | 0.986 | 0.804 | 0.835 | 0.873 | 0.810 |
| 195 | 0.986 | 0.804 | 0.835 | 0.873 | 0.810 |
| 196 | 0.986 | 0.809 | 0.835 | 0.874 | 0.812 |
| 197 | 0.986 | 0.809 | 0.835 | 0.874 | 0.812 |
| 198 | 0.986 | 0.809 | 0.835 | 0.874 | 0.812 |
| 199 | 0.986 | 0.809 | 0.835 | 0.874 | 0.812 |
| 200 | 0.986 | 0.809 | 0.835 | 0.874 | 0.812 |
| 201 | 0.986 | 0.809 | 0.835 | 0.874 | 0.812 |
| 202 | 0.986 | 0.809 | 0.835 | 0.874 | 0.812 |
| 203 | 0.986 | 0.809 | 0.835 | 0.874 | 0.812 |
| 204 | 0.986 | 0.809 | 0.835 | 0.874 | 0.812 |
| 205 | 0.986 | 0.809 | 0.832 | 0.873 | 0.811 |
| 206 | 0.986 | 0.809 | 0.832 | 0.873 | 0.811 |
| 207 | 0.986 | 0.809 | 0.832 | 0.873 | 0.811 |
| 208 | 0.986 | 0.809 | 0.832 | 0.873 | 0.811 |
| 209 | 0.986 | 0.809 | 0.832 | 0.873 | 0.811 |
| 210 | 0.986 | 0.809 | 0.832 | 0.873 | 0.811 |
| 211 | 0.986 | 0.809 | 0.832 | 0.873 | 0.811 |
| 212 | 0.986 | 0.809 | 0.832 | 0.873 | 0.811 |
| 213 | 0.986 | 0.809 | 0.832 | 0.873 | 0.811 |
| 214 | 0.986 | 0.809 | 0.832 | 0.873 | 0.811 |
| 215 | 0.986 | 0.809 | 0.832 | 0.873 | 0.811 |
| 216 | 0.986 | 0.809 | 0.832 | 0.873 | 0.811 |
| 217 | 0.986 | 0.809 | 0.832 | 0.873 | 0.811 |
| 218 | 0.988 | 0.801 | 0.820 | 0.868 | 0.802 |
| 219 | 0.988 | 0.801 | 0.820 | 0.868 | 0.802 |
| 220 | 0.988 | 0.801 | 0.820 | 0.868 | 0.802 |
| 221 | 0.988 | 0.801 | 0.820 | 0.868 | 0.802 |
| 222 | 0.988 | 0.801 | 0.820 | 0.868 | 0.802 |
| 223 | 0.988 | 0.801 | 0.820 | 0.868 | 0.802 |
| 224 | 0.988 | 0.801 | 0.820 | 0.868 | 0.802 |
| 225 | 0.988 | 0.801 | 0.823 | 0.869 | 0.804 |
| 226 | 0.988 | 0.801 | 0.823 | 0.869 | 0.804 |
| 227 | 0.988 | 0.801 | 0.823 | 0.869 | 0.804 |
| 228 | 0.988 | 0.801 | 0.823 | 0.869 | 0.804 |
| 229 | 0.988 | 0.801 | 0.823 | 0.869 | 0.804 |
| 230 | 0.988 | 0.801 | 0.823 | 0.869 | 0.804 |
| 231 | 0.988 | 0.801 | 0.823 | 0.869 | 0.804 |
| 232 | 0.988 | 0.801 | 0.823 | 0.869 | 0.804 |

|     |       |       |       |       |       |
|-----|-------|-------|-------|-------|-------|
| 233 | 0.988 | 0.801 | 0.823 | 0.869 | 0.804 |
| 234 | 0.988 | 0.801 | 0.823 | 0.869 | 0.804 |
| 235 | 0.988 | 0.801 | 0.823 | 0.869 | 0.804 |
| 236 | 0.988 | 0.801 | 0.823 | 0.869 | 0.804 |
| 237 | 0.988 | 0.832 | 0.820 | 0.879 | 0.819 |
| 238 | 0.988 | 0.832 | 0.820 | 0.879 | 0.819 |
| 239 | 0.988 | 0.832 | 0.820 | 0.879 | 0.819 |
| 240 | 0.988 | 0.832 | 0.820 | 0.879 | 0.819 |
| 241 | 0.988 | 0.832 | 0.820 | 0.879 | 0.819 |
| 242 | 0.988 | 0.832 | 0.820 | 0.879 | 0.819 |
| 243 | 0.988 | 0.832 | 0.820 | 0.879 | 0.819 |
| 244 | 0.988 | 0.832 | 0.820 | 0.879 | 0.819 |
| 245 | 0.988 | 0.827 | 0.820 | 0.877 | 0.816 |
| 246 | 0.988 | 0.827 | 0.820 | 0.877 | 0.816 |
| 247 | 0.988 | 0.827 | 0.820 | 0.877 | 0.816 |
| 248 | 0.988 | 0.827 | 0.820 | 0.877 | 0.816 |
| 249 | 0.988 | 0.827 | 0.820 | 0.877 | 0.816 |
| 250 | 0.988 | 0.827 | 0.820 | 0.877 | 0.816 |
| 251 | 0.988 | 0.827 | 0.820 | 0.877 | 0.816 |
| 252 | 0.988 | 0.827 | 0.820 | 0.877 | 0.816 |
| 253 | 0.988 | 0.827 | 0.820 | 0.877 | 0.816 |
| 254 | 0.988 | 0.827 | 0.820 | 0.877 | 0.816 |
| 255 | 0.988 | 0.827 | 0.820 | 0.877 | 0.816 |
| 256 | 0.988 | 0.827 | 0.820 | 0.877 | 0.816 |
| 257 | 0.988 | 0.824 | 0.820 | 0.876 | 0.815 |
| 258 | 0.988 | 0.824 | 0.820 | 0.876 | 0.815 |
| 259 | 0.988 | 0.824 | 0.820 | 0.876 | 0.815 |
| 260 | 0.988 | 0.824 | 0.820 | 0.876 | 0.815 |
| 261 | 0.988 | 0.824 | 0.820 | 0.876 | 0.815 |
| 262 | 0.988 | 0.824 | 0.820 | 0.876 | 0.815 |
| 263 | 0.988 | 0.824 | 0.820 | 0.876 | 0.815 |
| 264 | 0.988 | 0.824 | 0.820 | 0.876 | 0.815 |
| 265 | 0.988 | 0.824 | 0.820 | 0.876 | 0.815 |
| 266 | 0.988 | 0.827 | 0.820 | 0.877 | 0.816 |
| 267 | 0.988 | 0.827 | 0.820 | 0.877 | 0.816 |
| 268 | 0.988 | 0.824 | 0.820 | 0.876 | 0.815 |
| 269 | 0.988 | 0.824 | 0.820 | 0.876 | 0.815 |
| 270 | 0.986 | 0.822 | 0.820 | 0.874 | 0.812 |
| 271 | 0.986 | 0.822 | 0.817 | 0.873 | 0.810 |
| 272 | 0.986 | 0.822 | 0.817 | 0.873 | 0.810 |
| 273 | 0.986 | 0.822 | 0.817 | 0.873 | 0.810 |
| 274 | 0.986 | 0.822 | 0.817 | 0.873 | 0.810 |



|     |       |       |       |       |       |
|-----|-------|-------|-------|-------|-------|
| 275 | 0.986 | 0.822 | 0.817 | 0.873 | 0.810 |
| 276 | 0.986 | 0.822 | 0.817 | 0.873 | 0.810 |
| 277 | 0.986 | 0.822 | 0.817 | 0.873 | 0.810 |
| 278 | 0.986 | 0.822 | 0.817 | 0.873 | 0.810 |
| 279 | 0.986 | 0.822 | 0.817 | 0.873 | 0.810 |
| 280 | 0.986 | 0.822 | 0.817 | 0.873 | 0.810 |
| 281 | 0.986 | 0.822 | 0.817 | 0.873 | 0.810 |
| 282 | 0.986 | 0.822 | 0.817 | 0.873 | 0.810 |
| 283 | 0.986 | 0.822 | 0.817 | 0.873 | 0.810 |
| 284 | 0.986 | 0.822 | 0.817 | 0.873 | 0.810 |
| 285 | 0.986 | 0.822 | 0.817 | 0.873 | 0.810 |
| 286 | 0.986 | 0.822 | 0.817 | 0.873 | 0.810 |
| 287 | 0.986 | 0.822 | 0.817 | 0.873 | 0.810 |
| 288 | 0.986 | 0.822 | 0.817 | 0.873 | 0.810 |
| 289 | 0.986 | 0.822 | 0.817 | 0.873 | 0.810 |
| 290 | 0.986 | 0.822 | 0.820 | 0.874 | 0.812 |
| 291 | 0.986 | 0.822 | 0.820 | 0.874 | 0.812 |
| 292 | 0.986 | 0.822 | 0.820 | 0.874 | 0.812 |
| 293 | 0.988 | 0.822 | 0.823 | 0.876 | 0.815 |
| 294 | 0.988 | 0.819 | 0.823 | 0.875 | 0.813 |
| 295 | 0.988 | 0.819 | 0.820 | 0.874 | 0.812 |
| 296 | 0.988 | 0.819 | 0.820 | 0.874 | 0.812 |
| 297 | 0.988 | 0.819 | 0.823 | 0.875 | 0.813 |
| 298 | 0.988 | 0.819 | 0.823 | 0.875 | 0.813 |
| 299 | 0.988 | 0.819 | 0.823 | 0.875 | 0.813 |
| 300 | 0.988 | 0.819 | 0.823 | 0.875 | 0.813 |
| 301 | 0.988 | 0.819 | 0.823 | 0.875 | 0.813 |
| 302 | 0.988 | 0.819 | 0.823 | 0.875 | 0.813 |
| 303 | 0.988 | 0.819 | 0.826 | 0.876 | 0.815 |
| 304 | 0.986 | 0.822 | 0.820 | 0.874 | 0.812 |
| 305 | 0.986 | 0.822 | 0.820 | 0.874 | 0.812 |
| 306 | 0.986 | 0.822 | 0.820 | 0.874 | 0.812 |
| 307 | 0.986 | 0.822 | 0.820 | 0.874 | 0.812 |
| 308 | 0.986 | 0.822 | 0.820 | 0.874 | 0.812 |
| 309 | 0.986 | 0.822 | 0.820 | 0.874 | 0.812 |
| 310 | 0.986 | 0.819 | 0.823 | 0.874 | 0.812 |
| 311 | 0.986 | 0.819 | 0.823 | 0.874 | 0.812 |
| 312 | 0.986 | 0.819 | 0.823 | 0.874 | 0.812 |
| 313 | 0.986 | 0.819 | 0.823 | 0.874 | 0.812 |
| 314 | 0.986 | 0.804 | 0.832 | 0.872 | 0.808 |
| 315 | 0.986 | 0.804 | 0.832 | 0.872 | 0.808 |
| 316 | 0.986 | 0.804 | 0.832 | 0.872 | 0.808 |

|     |       |       |       |       |       |
|-----|-------|-------|-------|-------|-------|
| 317 | 0.986 | 0.804 | 0.832 | 0.872 | 0.808 |
| 318 | 0.986 | 0.804 | 0.832 | 0.872 | 0.808 |
| 319 | 0.986 | 0.804 | 0.832 | 0.872 | 0.808 |
| 320 | 0.986 | 0.804 | 0.832 | 0.872 | 0.808 |
| 321 | 0.986 | 0.804 | 0.832 | 0.872 | 0.808 |
| 322 | 0.986 | 0.804 | 0.832 | 0.872 | 0.808 |
| 323 | 0.986 | 0.804 | 0.832 | 0.872 | 0.808 |
| 324 | 0.986 | 0.804 | 0.832 | 0.872 | 0.808 |
| 325 | 0.986 | 0.804 | 0.832 | 0.872 | 0.808 |
| 326 | 0.986 | 0.804 | 0.832 | 0.872 | 0.808 |
| 327 | 0.986 | 0.804 | 0.832 | 0.872 | 0.808 |
| 328 | 0.986 | 0.804 | 0.832 | 0.872 | 0.808 |
| 329 | 0.986 | 0.804 | 0.832 | 0.872 | 0.808 |
| 330 | 0.986 | 0.804 | 0.832 | 0.872 | 0.808 |
| 331 | 0.986 | 0.804 | 0.832 | 0.872 | 0.808 |
| 332 | 0.986 | 0.804 | 0.832 | 0.872 | 0.808 |
| 333 | 0.986 | 0.804 | 0.832 | 0.872 | 0.808 |
| 334 | 0.986 | 0.804 | 0.832 | 0.872 | 0.808 |
| 335 | 0.986 | 0.804 | 0.832 | 0.872 | 0.808 |
| 336 | 0.986 | 0.804 | 0.832 | 0.872 | 0.808 |
| 337 | 0.986 | 0.804 | 0.832 | 0.872 | 0.808 |
| 338 | 0.986 | 0.804 | 0.832 | 0.872 | 0.808 |
| 339 | 0.983 | 0.806 | 0.829 | 0.871 | 0.807 |
| 340 | 0.983 | 0.806 | 0.829 | 0.871 | 0.807 |
| 341 | 0.983 | 0.806 | 0.829 | 0.871 | 0.807 |
| 342 | 0.983 | 0.806 | 0.829 | 0.871 | 0.807 |
| 343 | 0.983 | 0.806 | 0.829 | 0.871 | 0.807 |
| 344 | 0.983 | 0.806 | 0.829 | 0.871 | 0.807 |
| 345 | 0.983 | 0.804 | 0.829 | 0.870 | 0.805 |
| 346 | 0.983 | 0.804 | 0.829 | 0.870 | 0.805 |
| 347 | 0.983 | 0.804 | 0.829 | 0.870 | 0.805 |
| 348 | 0.983 | 0.804 | 0.829 | 0.870 | 0.805 |
| 349 | 0.983 | 0.804 | 0.829 | 0.870 | 0.805 |
| 350 | 0.983 | 0.804 | 0.829 | 0.870 | 0.805 |
| 351 | 0.986 | 0.793 | 0.838 | 0.870 | 0.806 |
| 352 | 0.986 | 0.791 | 0.844 | 0.871 | 0.807 |
| 353 | 0.986 | 0.791 | 0.838 | 0.869 | 0.805 |
| 354 | 0.986 | 0.791 | 0.838 | 0.869 | 0.805 |
| 355 | 0.986 | 0.791 | 0.838 | 0.869 | 0.805 |
| 356 | 0.991 | 0.791 | 0.838 | 0.871 | 0.807 |
| 357 | 0.991 | 0.791 | 0.838 | 0.871 | 0.807 |
| 358 | 0.991 | 0.791 | 0.838 | 0.871 | 0.807 |

|     |       |       |       |       |       |
|-----|-------|-------|-------|-------|-------|
| 359 | 0.991 | 0.791 | 0.838 | 0.871 | 0.807 |
| 360 | 0.991 | 0.791 | 0.838 | 0.871 | 0.807 |
| 361 | 0.991 | 0.791 | 0.838 | 0.871 | 0.807 |
| 362 | 0.983 | 0.783 | 0.844 | 0.867 | 0.802 |
| 363 | 0.983 | 0.780 | 0.844 | 0.866 | 0.801 |
| 364 | 0.983 | 0.780 | 0.844 | 0.866 | 0.801 |
| 365 | 0.983 | 0.780 | 0.844 | 0.866 | 0.801 |
| 366 | 0.983 | 0.778 | 0.850 | 0.867 | 0.802 |
| 367 | 0.983 | 0.778 | 0.850 | 0.867 | 0.802 |
| 368 | 0.983 | 0.778 | 0.850 | 0.867 | 0.802 |
| 369 | 0.983 | 0.778 | 0.850 | 0.867 | 0.802 |
| 370 | 0.983 | 0.778 | 0.850 | 0.867 | 0.802 |
| 371 | 0.983 | 0.778 | 0.850 | 0.867 | 0.802 |
| 372 | 0.986 | 0.778 | 0.853 | 0.869 | 0.805 |
| 373 | 0.986 | 0.778 | 0.853 | 0.869 | 0.805 |
| 374 | 0.986 | 0.778 | 0.853 | 0.869 | 0.805 |
| 375 | 0.986 | 0.778 | 0.853 | 0.869 | 0.805 |
| 376 | 0.986 | 0.778 | 0.853 | 0.869 | 0.805 |
| 377 | 0.986 | 0.778 | 0.853 | 0.869 | 0.805 |
| 378 | 0.986 | 0.778 | 0.853 | 0.869 | 0.805 |
| 379 | 0.986 | 0.778 | 0.853 | 0.869 | 0.805 |
| 380 | 0.986 | 0.778 | 0.853 | 0.869 | 0.805 |
| 381 | 0.986 | 0.778 | 0.853 | 0.869 | 0.805 |
| 382 | 0.986 | 0.778 | 0.853 | 0.869 | 0.805 |
| 383 | 0.986 | 0.778 | 0.853 | 0.869 | 0.805 |
| 384 | 0.986 | 0.778 | 0.853 | 0.869 | 0.805 |
| 385 | 0.986 | 0.778 | 0.853 | 0.869 | 0.805 |
| 386 | 0.986 | 0.778 | 0.850 | 0.868 | 0.804 |
| 387 | 0.986 | 0.778 | 0.850 | 0.868 | 0.804 |
| 388 | 0.986 | 0.778 | 0.847 | 0.867 | 0.802 |
| 389 | 0.986 | 0.778 | 0.850 | 0.868 | 0.804 |
| 390 | 0.986 | 0.778 | 0.850 | 0.868 | 0.804 |
| 391 | 0.986 | 0.778 | 0.850 | 0.868 | 0.804 |
| 392 | 0.986 | 0.778 | 0.850 | 0.868 | 0.804 |
| 393 | 0.986 | 0.778 | 0.850 | 0.868 | 0.804 |
| 394 | 0.986 | 0.778 | 0.850 | 0.868 | 0.804 |
| 395 | 0.986 | 0.778 | 0.853 | 0.869 | 0.805 |
| 396 | 0.986 | 0.778 | 0.853 | 0.869 | 0.805 |
| 397 | 0.986 | 0.778 | 0.853 | 0.869 | 0.805 |
| 398 | 0.986 | 0.778 | 0.853 | 0.869 | 0.805 |
| 399 | 0.986 | 0.778 | 0.853 | 0.869 | 0.805 |
| 400 | 0.986 | 0.778 | 0.841 | 0.865 | 0.799 |

|     |       |       |       |       |       |
|-----|-------|-------|-------|-------|-------|
| 401 | 0.986 | 0.778 | 0.841 | 0.865 | 0.799 |
| 402 | 0.986 | 0.778 | 0.841 | 0.865 | 0.799 |
| 403 | 0.986 | 0.778 | 0.841 | 0.865 | 0.799 |
| 404 | 0.986 | 0.778 | 0.841 | 0.865 | 0.799 |
| 405 | 0.986 | 0.778 | 0.841 | 0.865 | 0.799 |
| 406 | 0.986 | 0.778 | 0.841 | 0.865 | 0.799 |
| 407 | 0.986 | 0.778 | 0.841 | 0.865 | 0.799 |
| 408 | 0.986 | 0.778 | 0.841 | 0.865 | 0.799 |
| 409 | 0.986 | 0.778 | 0.841 | 0.865 | 0.799 |
| 410 | 0.986 | 0.778 | 0.841 | 0.865 | 0.799 |
| 411 | 0.986 | 0.778 | 0.841 | 0.865 | 0.799 |
| 412 | 0.986 | 0.778 | 0.841 | 0.865 | 0.799 |
| 413 | 0.986 | 0.778 | 0.841 | 0.865 | 0.799 |
| 414 | 0.986 | 0.778 | 0.841 | 0.865 | 0.799 |
| 415 | 0.983 | 0.775 | 0.847 | 0.865 | 0.800 |
| 416 | 0.983 | 0.775 | 0.847 | 0.865 | 0.800 |
| 417 | 0.983 | 0.775 | 0.847 | 0.865 | 0.800 |
| 418 | 0.983 | 0.775 | 0.847 | 0.865 | 0.800 |
| 419 | 0.983 | 0.775 | 0.847 | 0.865 | 0.800 |
| 420 | 0.983 | 0.775 | 0.847 | 0.865 | 0.800 |
| 421 | 0.983 | 0.775 | 0.847 | 0.865 | 0.800 |
| 422 | 0.980 | 0.767 | 0.850 | 0.862 | 0.796 |
| 423 | 0.980 | 0.767 | 0.850 | 0.862 | 0.796 |
| 424 | 0.980 | 0.770 | 0.850 | 0.863 | 0.797 |
| 425 | 0.980 | 0.770 | 0.850 | 0.863 | 0.797 |
| 426 | 0.980 | 0.770 | 0.850 | 0.863 | 0.797 |
| 427 | 0.980 | 0.770 | 0.850 | 0.863 | 0.797 |
| 428 | 0.980 | 0.770 | 0.850 | 0.863 | 0.797 |
| 429 | 0.980 | 0.770 | 0.850 | 0.863 | 0.797 |
| 430 | 0.980 | 0.770 | 0.850 | 0.863 | 0.797 |
| 431 | 0.980 | 0.770 | 0.850 | 0.863 | 0.797 |
| 432 | 0.986 | 0.770 | 0.847 | 0.864 | 0.798 |
| 433 | 0.986 | 0.770 | 0.847 | 0.864 | 0.798 |
| 434 | 0.986 | 0.770 | 0.847 | 0.864 | 0.798 |
| 435 | 0.986 | 0.770 | 0.847 | 0.864 | 0.798 |
| 436 | 0.983 | 0.773 | 0.847 | 0.864 | 0.798 |
| 437 | 0.983 | 0.773 | 0.847 | 0.864 | 0.798 |
| 438 | 0.986 | 0.773 | 0.847 | 0.865 | 0.800 |
| 439 | 0.986 | 0.773 | 0.847 | 0.865 | 0.800 |
| 440 | 0.986 | 0.773 | 0.847 | 0.865 | 0.800 |
| 441 | 0.986 | 0.773 | 0.847 | 0.865 | 0.800 |
| 442 | 0.986 | 0.773 | 0.850 | 0.866 | 0.801 |

|     |       |       |       |       |       |
|-----|-------|-------|-------|-------|-------|
| 443 | 0.986 | 0.773 | 0.850 | 0.866 | 0.801 |
| 444 | 0.986 | 0.773 | 0.850 | 0.866 | 0.801 |
| 445 | 0.986 | 0.773 | 0.847 | 0.865 | 0.800 |
| 446 | 0.988 | 0.765 | 0.850 | 0.864 | 0.799 |
| 447 | 0.988 | 0.765 | 0.850 | 0.864 | 0.799 |
| 448 | 0.988 | 0.765 | 0.850 | 0.864 | 0.799 |
| 449 | 0.988 | 0.765 | 0.850 | 0.864 | 0.799 |
| 450 | 0.988 | 0.765 | 0.850 | 0.864 | 0.799 |
| 451 | 0.988 | 0.762 | 0.847 | 0.862 | 0.796 |
| 452 | 0.988 | 0.762 | 0.847 | 0.862 | 0.796 |
| 453 | 0.988 | 0.762 | 0.850 | 0.863 | 0.797 |
| 454 | 0.988 | 0.762 | 0.850 | 0.863 | 0.797 |
| 455 | 0.988 | 0.762 | 0.850 | 0.863 | 0.797 |
| 456 | 0.988 | 0.762 | 0.850 | 0.863 | 0.797 |
| 457 | 0.988 | 0.762 | 0.850 | 0.863 | 0.797 |
| 458 | 0.988 | 0.762 | 0.850 | 0.863 | 0.797 |
| 459 | 0.988 | 0.762 | 0.850 | 0.863 | 0.797 |
| 460 | 0.988 | 0.762 | 0.850 | 0.863 | 0.797 |
| 461 | 0.988 | 0.762 | 0.850 | 0.863 | 0.797 |
| 462 | 0.988 | 0.762 | 0.850 | 0.863 | 0.797 |
| 463 | 0.988 | 0.765 | 0.850 | 0.864 | 0.799 |
| 464 | 0.988 | 0.762 | 0.847 | 0.862 | 0.796 |
| 465 | 0.988 | 0.762 | 0.847 | 0.862 | 0.796 |
| 466 | 0.988 | 0.762 | 0.847 | 0.862 | 0.796 |
| 467 | 0.988 | 0.762 | 0.847 | 0.862 | 0.796 |
| 468 | 0.988 | 0.767 | 0.850 | 0.865 | 0.800 |
| 469 | 0.988 | 0.767 | 0.850 | 0.865 | 0.800 |
| 470 | 0.988 | 0.767 | 0.850 | 0.865 | 0.800 |
| 471 | 0.988 | 0.767 | 0.850 | 0.865 | 0.800 |
| 472 | 0.988 | 0.767 | 0.850 | 0.865 | 0.800 |
| 473 | 0.988 | 0.767 | 0.850 | 0.865 | 0.800 |
| 474 | 0.988 | 0.767 | 0.850 | 0.865 | 0.800 |
| 475 | 0.988 | 0.767 | 0.850 | 0.865 | 0.800 |
| 476 | 0.988 | 0.767 | 0.850 | 0.865 | 0.800 |
| 477 | 0.988 | 0.767 | 0.850 | 0.865 | 0.800 |
| 478 | 0.988 | 0.767 | 0.850 | 0.865 | 0.800 |
| 479 | 0.988 | 0.767 | 0.850 | 0.865 | 0.800 |
| 480 | 0.988 | 0.767 | 0.850 | 0.865 | 0.800 |
| 481 | 0.988 | 0.767 | 0.850 | 0.865 | 0.800 |
| 482 | 0.986 | 0.762 | 0.853 | 0.863 | 0.797 |
| 483 | 0.986 | 0.762 | 0.853 | 0.863 | 0.797 |
| 484 | 0.986 | 0.762 | 0.853 | 0.863 | 0.797 |

|     |       |       |       |       |       |
|-----|-------|-------|-------|-------|-------|
| 485 | 0.986 | 0.762 | 0.853 | 0.863 | 0.797 |
| 486 | 0.986 | 0.762 | 0.853 | 0.863 | 0.797 |
| 487 | 0.986 | 0.762 | 0.853 | 0.863 | 0.797 |
| 488 | 0.980 | 0.767 | 0.853 | 0.863 | 0.797 |
| 489 | 0.980 | 0.765 | 0.856 | 0.863 | 0.797 |
| 490 | 0.980 | 0.765 | 0.856 | 0.863 | 0.797 |
| 491 | 0.980 | 0.765 | 0.856 | 0.863 | 0.797 |
| 492 | 0.980 | 0.765 | 0.856 | 0.863 | 0.797 |
| 493 | 0.980 | 0.762 | 0.859 | 0.863 | 0.798 |
| 494 | 0.980 | 0.752 | 0.859 | 0.859 | 0.792 |
| 495 | 0.980 | 0.760 | 0.862 | 0.863 | 0.798 |
| 496 | 0.980 | 0.757 | 0.862 | 0.862 | 0.797 |
| 497 | 0.983 | 0.755 | 0.862 | 0.862 | 0.797 |
| 498 | 0.983 | 0.755 | 0.862 | 0.862 | 0.797 |
| 499 | 0.983 | 0.755 | 0.862 | 0.862 | 0.797 |
| 500 | 0.974 | 0.742 | 0.856 | 0.853 | 0.783 |
| 501 | 0.974 | 0.742 | 0.853 | 0.852 | 0.781 |
| 502 | 0.974 | 0.742 | 0.853 | 0.852 | 0.781 |
| 503 | 0.974 | 0.742 | 0.853 | 0.852 | 0.781 |
| 504 | 0.974 | 0.742 | 0.853 | 0.852 | 0.781 |
| 505 | 0.974 | 0.742 | 0.853 | 0.852 | 0.781 |
| 506 | 0.974 | 0.739 | 0.853 | 0.851 | 0.780 |
| 507 | 0.974 | 0.742 | 0.853 | 0.852 | 0.781 |
| 508 | 0.974 | 0.742 | 0.853 | 0.852 | 0.781 |
| 509 | 0.974 | 0.742 | 0.853 | 0.852 | 0.781 |
| 510 | 0.974 | 0.742 | 0.853 | 0.852 | 0.781 |
| 511 | 0.974 | 0.742 | 0.853 | 0.852 | 0.781 |
| 512 | 0.974 | 0.739 | 0.853 | 0.851 | 0.780 |
| 513 | 0.974 | 0.742 | 0.853 | 0.852 | 0.781 |
| 514 | 0.974 | 0.739 | 0.853 | 0.851 | 0.780 |
| 515 | 0.974 | 0.739 | 0.856 | 0.852 | 0.782 |
| 516 | 0.974 | 0.739 | 0.856 | 0.852 | 0.782 |
| 517 | 0.974 | 0.742 | 0.856 | 0.853 | 0.783 |
| 518 | 0.974 | 0.742 | 0.856 | 0.853 | 0.783 |
| 519 | 0.974 | 0.742 | 0.856 | 0.853 | 0.783 |
| 520 | 0.974 | 0.744 | 0.856 | 0.854 | 0.784 |
| 521 | 0.974 | 0.744 | 0.856 | 0.854 | 0.784 |
| 522 | 0.977 | 0.739 | 0.862 | 0.855 | 0.786 |
| 523 | 0.977 | 0.739 | 0.862 | 0.855 | 0.786 |
| 524 | 0.977 | 0.739 | 0.862 | 0.855 | 0.786 |
| 525 | 0.977 | 0.739 | 0.862 | 0.855 | 0.786 |
| 526 | 0.977 | 0.739 | 0.862 | 0.855 | 0.786 |

|     |       |       |       |       |       |
|-----|-------|-------|-------|-------|-------|
| 527 | 0.977 | 0.739 | 0.862 | 0.855 | 0.786 |
| 528 | 0.977 | 0.739 | 0.862 | 0.855 | 0.786 |
| 529 | 0.977 | 0.739 | 0.862 | 0.855 | 0.786 |
| 530 | 0.977 | 0.739 | 0.862 | 0.855 | 0.786 |
| 531 | 0.977 | 0.742 | 0.862 | 0.856 | 0.787 |
| 532 | 0.977 | 0.742 | 0.862 | 0.856 | 0.787 |
| 533 | 0.977 | 0.744 | 0.862 | 0.857 | 0.789 |
| 534 | 0.977 | 0.747 | 0.865 | 0.858 | 0.791 |
| 535 | 0.977 | 0.747 | 0.865 | 0.858 | 0.791 |
| 536 | 0.974 | 0.742 | 0.859 | 0.854 | 0.784 |
| 537 | 0.974 | 0.742 | 0.859 | 0.854 | 0.784 |
| 538 | 0.974 | 0.742 | 0.859 | 0.854 | 0.784 |
| 539 | 0.971 | 0.752 | 0.856 | 0.856 | 0.787 |
| 540 | 0.971 | 0.752 | 0.856 | 0.856 | 0.787 |
| 541 | 0.971 | 0.752 | 0.856 | 0.856 | 0.787 |
| 542 | 0.971 | 0.755 | 0.856 | 0.857 | 0.788 |
| 543 | 0.971 | 0.755 | 0.856 | 0.857 | 0.788 |
| 544 | 0.971 | 0.755 | 0.856 | 0.857 | 0.788 |
| 545 | 0.971 | 0.755 | 0.856 | 0.857 | 0.788 |
| 546 | 0.971 | 0.757 | 0.853 | 0.857 | 0.788 |
| 547 | 0.971 | 0.752 | 0.853 | 0.855 | 0.785 |
| 548 | 0.971 | 0.752 | 0.853 | 0.855 | 0.785 |
| 549 | 0.971 | 0.752 | 0.853 | 0.855 | 0.785 |
| 550 | 0.971 | 0.752 | 0.853 | 0.855 | 0.785 |
| 551 | 0.971 | 0.752 | 0.853 | 0.855 | 0.785 |
| 552 | 0.971 | 0.752 | 0.853 | 0.855 | 0.785 |
| 553 | 0.971 | 0.752 | 0.853 | 0.855 | 0.785 |
| 554 | 0.971 | 0.752 | 0.853 | 0.855 | 0.785 |
| 555 | 0.971 | 0.752 | 0.853 | 0.855 | 0.785 |
| 556 | 0.971 | 0.752 | 0.853 | 0.855 | 0.785 |
| 557 | 0.971 | 0.752 | 0.853 | 0.855 | 0.785 |
| 558 | 0.971 | 0.752 | 0.853 | 0.855 | 0.785 |
| 559 | 0.971 | 0.752 | 0.853 | 0.855 | 0.785 |
| 560 | 0.971 | 0.752 | 0.853 | 0.855 | 0.785 |
| 561 | 0.971 | 0.752 | 0.853 | 0.855 | 0.785 |
| 562 | 0.971 | 0.752 | 0.853 | 0.855 | 0.785 |
| 563 | 0.971 | 0.752 | 0.853 | 0.855 | 0.785 |
| 564 | 0.971 | 0.752 | 0.853 | 0.855 | 0.785 |
| 565 | 0.971 | 0.752 | 0.853 | 0.855 | 0.785 |
| 566 | 0.971 | 0.752 | 0.853 | 0.855 | 0.785 |
| 567 | 0.971 | 0.752 | 0.853 | 0.855 | 0.785 |
| 568 | 0.971 | 0.752 | 0.856 | 0.856 | 0.787 |

|     |       |       |       |       |       |
|-----|-------|-------|-------|-------|-------|
| 569 | 0.971 | 0.752 | 0.856 | 0.856 | 0.787 |
| 570 | 0.971 | 0.752 | 0.856 | 0.856 | 0.787 |
| 571 | 0.971 | 0.749 | 0.856 | 0.855 | 0.785 |
| 572 | 0.971 | 0.749 | 0.862 | 0.857 | 0.788 |
| 573 | 0.971 | 0.749 | 0.862 | 0.857 | 0.788 |
| 574 | 0.971 | 0.749 | 0.862 | 0.857 | 0.788 |
| 575 | 0.971 | 0.749 | 0.862 | 0.857 | 0.788 |
| 576 | 0.971 | 0.749 | 0.862 | 0.857 | 0.788 |
| 577 | 0.971 | 0.749 | 0.862 | 0.857 | 0.788 |
| 578 | 0.971 | 0.749 | 0.862 | 0.857 | 0.788 |
| 579 | 0.971 | 0.749 | 0.862 | 0.857 | 0.788 |
| 580 | 0.971 | 0.749 | 0.862 | 0.857 | 0.788 |
| 581 | 0.971 | 0.749 | 0.862 | 0.857 | 0.788 |
| 582 | 0.971 | 0.747 | 0.859 | 0.855 | 0.786 |
| 583 | 0.971 | 0.747 | 0.859 | 0.855 | 0.786 |
| 584 | 0.971 | 0.747 | 0.859 | 0.855 | 0.786 |
| 585 | 0.971 | 0.747 | 0.859 | 0.855 | 0.786 |
| 586 | 0.971 | 0.744 | 0.859 | 0.854 | 0.784 |
| 587 | 0.971 | 0.744 | 0.859 | 0.854 | 0.784 |
| 588 | 0.971 | 0.744 | 0.859 | 0.854 | 0.784 |
| 589 | 0.971 | 0.744 | 0.859 | 0.854 | 0.784 |
| 590 | 0.971 | 0.744 | 0.859 | 0.854 | 0.784 |
| 591 | 0.971 | 0.747 | 0.859 | 0.855 | 0.786 |
| 592 | 0.971 | 0.747 | 0.859 | 0.855 | 0.786 |
| 593 | 0.971 | 0.747 | 0.859 | 0.855 | 0.786 |
| 594 | 0.971 | 0.747 | 0.859 | 0.855 | 0.786 |
| 595 | 0.971 | 0.744 | 0.859 | 0.854 | 0.784 |
| 596 | 0.971 | 0.747 | 0.859 | 0.855 | 0.786 |
| 597 | 0.971 | 0.744 | 0.859 | 0.854 | 0.784 |
| 598 | 0.971 | 0.744 | 0.859 | 0.854 | 0.784 |
| 599 | 0.971 | 0.744 | 0.859 | 0.854 | 0.784 |
| 600 | 0.971 | 0.744 | 0.859 | 0.854 | 0.784 |
| 601 | 0.971 | 0.744 | 0.859 | 0.854 | 0.784 |
| 602 | 0.971 | 0.744 | 0.859 | 0.854 | 0.784 |
| 603 | 0.971 | 0.744 | 0.859 | 0.854 | 0.784 |
| 604 | 0.971 | 0.744 | 0.859 | 0.854 | 0.784 |
| 605 | 0.971 | 0.744 | 0.859 | 0.854 | 0.784 |
| 606 | 0.971 | 0.744 | 0.859 | 0.854 | 0.784 |
| 607 | 0.971 | 0.744 | 0.859 | 0.854 | 0.784 |
| 608 | 0.971 | 0.744 | 0.859 | 0.854 | 0.784 |
| 609 | 0.971 | 0.744 | 0.859 | 0.854 | 0.784 |
| 610 | 0.971 | 0.749 | 0.847 | 0.852 | 0.781 |



|     |       |       |       |       |       |
|-----|-------|-------|-------|-------|-------|
| 611 | 0.971 | 0.749 | 0.847 | 0.852 | 0.781 |
| 612 | 0.971 | 0.749 | 0.847 | 0.852 | 0.781 |
| 613 | 0.974 | 0.752 | 0.847 | 0.854 | 0.783 |
| 614 | 0.974 | 0.752 | 0.847 | 0.854 | 0.783 |
| 615 | 0.974 | 0.752 | 0.847 | 0.854 | 0.783 |
| 616 | 0.974 | 0.752 | 0.847 | 0.854 | 0.783 |
| 617 | 0.974 | 0.752 | 0.847 | 0.854 | 0.783 |
| 618 | 0.974 | 0.752 | 0.847 | 0.854 | 0.783 |
| 619 | 0.974 | 0.752 | 0.847 | 0.854 | 0.783 |
| 620 | 0.971 | 0.752 | 0.847 | 0.853 | 0.782 |
| 621 | 0.971 | 0.752 | 0.847 | 0.853 | 0.782 |
| 622 | 0.971 | 0.752 | 0.847 | 0.853 | 0.782 |
| 623 | 0.971 | 0.752 | 0.847 | 0.853 | 0.782 |
| 624 | 0.971 | 0.752 | 0.847 | 0.853 | 0.782 |
| 625 | 0.971 | 0.752 | 0.847 | 0.853 | 0.782 |
| 626 | 0.971 | 0.752 | 0.847 | 0.853 | 0.782 |
| 627 | 0.971 | 0.752 | 0.847 | 0.853 | 0.782 |
| 628 | 0.971 | 0.752 | 0.847 | 0.853 | 0.782 |
| 629 | 0.971 | 0.752 | 0.847 | 0.853 | 0.782 |
| 630 | 0.971 | 0.752 | 0.847 | 0.853 | 0.782 |
| 631 | 0.971 | 0.752 | 0.847 | 0.853 | 0.782 |
| 632 | 0.971 | 0.752 | 0.847 | 0.853 | 0.782 |
| 633 | 0.971 | 0.752 | 0.847 | 0.853 | 0.782 |
| 634 | 0.971 | 0.752 | 0.847 | 0.853 | 0.782 |
| 635 | 0.971 | 0.752 | 0.847 | 0.853 | 0.782 |
| 636 | 0.971 | 0.752 | 0.847 | 0.853 | 0.782 |
| 637 | 0.971 | 0.752 | 0.847 | 0.853 | 0.782 |
| 638 | 0.971 | 0.752 | 0.847 | 0.853 | 0.782 |
| 639 | 0.971 | 0.752 | 0.847 | 0.853 | 0.782 |
| 640 | 0.971 | 0.752 | 0.847 | 0.853 | 0.782 |
| 641 | 0.971 | 0.752 | 0.847 | 0.853 | 0.782 |
| 642 | 0.971 | 0.752 | 0.847 | 0.853 | 0.782 |
| 643 | 0.971 | 0.752 | 0.847 | 0.853 | 0.782 |
| 644 | 0.971 | 0.752 | 0.847 | 0.853 | 0.782 |
| 645 | 0.971 | 0.752 | 0.847 | 0.853 | 0.782 |
| 646 | 0.971 | 0.752 | 0.847 | 0.853 | 0.782 |
| 647 | 0.971 | 0.752 | 0.847 | 0.853 | 0.782 |
| 648 | 0.971 | 0.752 | 0.847 | 0.853 | 0.782 |
| 649 | 0.971 | 0.752 | 0.847 | 0.853 | 0.782 |
| 650 | 0.971 | 0.752 | 0.847 | 0.853 | 0.782 |
| 651 | 0.971 | 0.752 | 0.847 | 0.853 | 0.782 |
| 652 | 0.971 | 0.752 | 0.847 | 0.853 | 0.782 |

|     |       |       |       |       |       |
|-----|-------|-------|-------|-------|-------|
| 653 | 0.971 | 0.752 | 0.847 | 0.853 | 0.782 |
| 654 | 0.974 | 0.752 | 0.847 | 0.854 | 0.783 |
| 655 | 0.974 | 0.752 | 0.847 | 0.854 | 0.783 |
| 656 | 0.974 | 0.752 | 0.847 | 0.854 | 0.783 |
| 657 | 0.977 | 0.752 | 0.847 | 0.855 | 0.785 |
| 658 | 0.977 | 0.752 | 0.847 | 0.855 | 0.785 |
| 659 | 0.977 | 0.752 | 0.847 | 0.855 | 0.785 |
| 660 | 0.977 | 0.752 | 0.847 | 0.855 | 0.785 |
| 661 | 0.977 | 0.752 | 0.847 | 0.855 | 0.785 |
| 662 | 0.977 | 0.752 | 0.847 | 0.855 | 0.785 |
| 663 | 0.977 | 0.752 | 0.847 | 0.855 | 0.785 |
| 664 | 0.977 | 0.752 | 0.847 | 0.855 | 0.785 |
| 665 | 0.977 | 0.752 | 0.847 | 0.855 | 0.785 |
| 666 | 0.977 | 0.752 | 0.847 | 0.855 | 0.785 |
| 667 | 0.977 | 0.752 | 0.847 | 0.855 | 0.785 |
| 668 | 0.977 | 0.752 | 0.847 | 0.855 | 0.785 |
| 669 | 0.977 | 0.752 | 0.847 | 0.855 | 0.785 |
| 670 | 0.977 | 0.752 | 0.847 | 0.855 | 0.785 |
| 671 | 0.977 | 0.752 | 0.847 | 0.855 | 0.785 |
| 672 | 0.977 | 0.752 | 0.847 | 0.855 | 0.785 |
| 673 | 0.977 | 0.752 | 0.847 | 0.855 | 0.785 |
| 674 | 0.977 | 0.752 | 0.847 | 0.855 | 0.785 |
| 675 | 0.977 | 0.752 | 0.847 | 0.855 | 0.785 |
| 676 | 0.977 | 0.752 | 0.847 | 0.855 | 0.785 |
| 677 | 0.977 | 0.752 | 0.847 | 0.855 | 0.785 |
| 678 | 0.977 | 0.752 | 0.847 | 0.855 | 0.785 |
| 679 | 0.977 | 0.752 | 0.847 | 0.855 | 0.785 |
| 680 | 0.977 | 0.752 | 0.847 | 0.855 | 0.785 |
| 681 | 0.977 | 0.752 | 0.847 | 0.855 | 0.785 |
| 682 | 0.977 | 0.752 | 0.847 | 0.855 | 0.785 |
| 683 | 0.977 | 0.752 | 0.847 | 0.855 | 0.785 |
| 684 | 0.977 | 0.752 | 0.847 | 0.855 | 0.785 |
| 685 | 0.977 | 0.752 | 0.847 | 0.855 | 0.785 |
| 686 | 0.977 | 0.752 | 0.847 | 0.855 | 0.785 |
| 687 | 0.977 | 0.752 | 0.847 | 0.855 | 0.785 |
| 688 | 0.977 | 0.752 | 0.847 | 0.855 | 0.785 |
| 689 | 0.977 | 0.752 | 0.847 | 0.855 | 0.785 |
| 690 | 0.977 | 0.752 | 0.847 | 0.855 | 0.785 |
| 691 | 0.977 | 0.752 | 0.847 | 0.855 | 0.785 |
| 692 | 0.977 | 0.752 | 0.847 | 0.855 | 0.785 |
| 693 | 0.977 | 0.752 | 0.847 | 0.855 | 0.785 |
| 694 | 0.977 | 0.752 | 0.847 | 0.855 | 0.785 |

|     |       |       |       |       |       |
|-----|-------|-------|-------|-------|-------|
| 695 | 0.977 | 0.752 | 0.847 | 0.855 | 0.785 |
| 696 | 0.977 | 0.752 | 0.847 | 0.855 | 0.785 |
| 697 | 0.977 | 0.752 | 0.847 | 0.855 | 0.785 |
| 698 | 0.977 | 0.752 | 0.850 | 0.856 | 0.786 |
| 699 | 0.977 | 0.752 | 0.850 | 0.856 | 0.786 |
| 700 | 0.977 | 0.752 | 0.850 | 0.856 | 0.786 |
| 701 | 0.977 | 0.752 | 0.850 | 0.856 | 0.786 |
| 702 | 0.977 | 0.752 | 0.850 | 0.856 | 0.786 |
| 703 | 0.977 | 0.752 | 0.847 | 0.855 | 0.785 |
| 704 | 0.974 | 0.752 | 0.847 | 0.854 | 0.784 |
| 705 | 0.974 | 0.752 | 0.847 | 0.854 | 0.784 |
| 706 | 0.974 | 0.752 | 0.847 | 0.854 | 0.784 |
| 707 | 0.974 | 0.752 | 0.847 | 0.854 | 0.784 |
| 708 | 0.974 | 0.752 | 0.847 | 0.854 | 0.784 |
| 709 | 0.974 | 0.752 | 0.847 | 0.854 | 0.784 |
| 710 | 0.974 | 0.752 | 0.847 | 0.854 | 0.784 |
| 711 | 0.974 | 0.752 | 0.847 | 0.854 | 0.784 |
| 712 | 0.974 | 0.752 | 0.847 | 0.854 | 0.784 |
| 713 | 0.974 | 0.752 | 0.847 | 0.854 | 0.784 |
| 714 | 0.974 | 0.752 | 0.850 | 0.855 | 0.785 |
| 715 | 0.974 | 0.752 | 0.847 | 0.854 | 0.784 |
| 716 | 0.974 | 0.752 | 0.850 | 0.855 | 0.785 |
| 717 | 0.974 | 0.752 | 0.850 | 0.855 | 0.785 |
| 718 | 0.974 | 0.752 | 0.850 | 0.855 | 0.785 |
| 719 | 0.971 | 0.752 | 0.850 | 0.854 | 0.784 |
| 720 | 0.971 | 0.752 | 0.847 | 0.853 | 0.782 |
| 721 | 0.974 | 0.752 | 0.847 | 0.854 | 0.783 |
| 722 | 0.971 | 0.752 | 0.847 | 0.853 | 0.782 |
| 723 | 0.974 | 0.752 | 0.847 | 0.854 | 0.784 |
| 724 | 0.974 | 0.752 | 0.847 | 0.854 | 0.784 |
| 725 | 0.974 | 0.752 | 0.847 | 0.854 | 0.784 |
| 726 | 0.974 | 0.752 | 0.847 | 0.854 | 0.784 |
| 727 | 0.974 | 0.752 | 0.847 | 0.854 | 0.784 |
| 728 | 0.974 | 0.752 | 0.847 | 0.854 | 0.784 |
| 729 | 0.977 | 0.752 | 0.847 | 0.855 | 0.785 |
| 730 | 0.974 | 0.752 | 0.847 | 0.854 | 0.784 |
| 731 | 0.977 | 0.752 | 0.847 | 0.855 | 0.785 |
| 732 | 0.974 | 0.752 | 0.847 | 0.854 | 0.784 |
| 733 | 0.974 | 0.752 | 0.847 | 0.854 | 0.784 |
| 734 | 0.974 | 0.752 | 0.847 | 0.854 | 0.784 |
| 735 | 0.974 | 0.752 | 0.847 | 0.854 | 0.784 |
| 736 | 0.974 | 0.752 | 0.847 | 0.854 | 0.784 |

|     |       |       |       |       |       |
|-----|-------|-------|-------|-------|-------|
| 737 | 0.974 | 0.752 | 0.847 | 0.854 | 0.784 |
| 738 | 0.974 | 0.752 | 0.847 | 0.854 | 0.784 |
| 739 | 0.980 | 0.749 | 0.847 | 0.855 | 0.785 |
| 740 | 0.980 | 0.749 | 0.847 | 0.855 | 0.785 |
| 741 | 0.980 | 0.749 | 0.847 | 0.855 | 0.785 |
| 742 | 0.980 | 0.749 | 0.847 | 0.855 | 0.785 |
| 743 | 0.980 | 0.749 | 0.847 | 0.855 | 0.785 |
| 744 | 0.980 | 0.749 | 0.847 | 0.855 | 0.785 |
| 745 | 0.980 | 0.749 | 0.847 | 0.855 | 0.785 |
| 746 | 0.980 | 0.749 | 0.847 | 0.855 | 0.785 |
| 747 | 0.980 | 0.749 | 0.847 | 0.855 | 0.785 |
| 748 | 0.980 | 0.749 | 0.847 | 0.855 | 0.785 |
| 749 | 0.980 | 0.749 | 0.847 | 0.855 | 0.785 |
| 750 | 0.980 | 0.749 | 0.847 | 0.855 | 0.785 |
| 751 | 0.980 | 0.749 | 0.847 | 0.855 | 0.785 |
| 752 | 0.980 | 0.749 | 0.847 | 0.855 | 0.785 |
| 753 | 0.980 | 0.749 | 0.847 | 0.855 | 0.785 |
| 754 | 0.980 | 0.749 | 0.847 | 0.855 | 0.785 |
| 755 | 0.980 | 0.749 | 0.847 | 0.855 | 0.785 |
| 756 | 0.980 | 0.749 | 0.847 | 0.855 | 0.785 |
| 757 | 0.980 | 0.749 | 0.847 | 0.855 | 0.785 |
| 758 | 0.980 | 0.749 | 0.847 | 0.855 | 0.785 |
| 759 | 0.980 | 0.749 | 0.847 | 0.855 | 0.785 |
| 760 | 0.971 | 0.731 | 0.859 | 0.849 | 0.778 |
| 761 | 0.971 | 0.731 | 0.859 | 0.849 | 0.778 |
| 762 | 0.971 | 0.731 | 0.859 | 0.849 | 0.778 |
| 763 | 0.971 | 0.731 | 0.859 | 0.849 | 0.778 |
| 764 | 0.971 | 0.731 | 0.859 | 0.849 | 0.778 |
| 765 | 0.971 | 0.731 | 0.859 | 0.849 | 0.778 |
| 766 | 0.971 | 0.731 | 0.859 | 0.849 | 0.778 |
| 767 | 0.971 | 0.731 | 0.859 | 0.849 | 0.778 |
| 768 | 0.971 | 0.729 | 0.859 | 0.848 | 0.777 |
| 769 | 0.971 | 0.734 | 0.859 | 0.850 | 0.779 |
| 770 | 0.971 | 0.734 | 0.859 | 0.850 | 0.779 |
| 771 | 0.971 | 0.734 | 0.859 | 0.850 | 0.779 |
| 772 | 0.971 | 0.731 | 0.859 | 0.849 | 0.778 |
| 773 | 0.971 | 0.731 | 0.859 | 0.849 | 0.778 |
| 774 | 0.971 | 0.731 | 0.859 | 0.849 | 0.778 |
| 775 | 0.971 | 0.731 | 0.859 | 0.849 | 0.778 |
| 776 | 0.971 | 0.731 | 0.859 | 0.849 | 0.778 |
| 777 | 0.971 | 0.731 | 0.859 | 0.849 | 0.778 |
| 778 | 0.971 | 0.731 | 0.859 | 0.849 | 0.778 |

|                            |           |             |          |            |            |
|----------------------------|-----------|-------------|----------|------------|------------|
| 779                        | 0.971     | 0.736       | 0.859    | 0.851      | 0.780      |
| 780                        | 0.971     | 0.736       | 0.859    | 0.851      | 0.780      |
| 781                        | 0.971     | 0.734       | 0.859    | 0.850      | 0.779      |
| 782                        | 0.971     | 0.734       | 0.859    | 0.850      | 0.779      |
| 783                        | 0.971     | 0.734       | 0.859    | 0.850      | 0.779      |
| 784                        | 0.971     | 0.734       | 0.859    | 0.850      | 0.779      |
| 785                        | 0.971     | 0.731       | 0.859    | 0.849      | 0.778      |
| 786                        | 0.971     | 0.734       | 0.859    | 0.850      | 0.779      |
| 787                        | 0.971     | 0.736       | 0.859    | 0.851      | 0.780      |
| 788                        | 0.971     | 0.736       | 0.859    | 0.851      | 0.780      |
| <b>MCFS</b>                |           |             |          |            |            |
| <b>Numbers of features</b> | <b>G1</b> | <b>G2/M</b> | <b>S</b> | <b>ACC</b> | <b>MCC</b> |
| 1                          | 0.942     | 0.682       | 0.689    | 0.769      | 0.654      |
| 2                          | 0.951     | 0.677       | 0.775    | 0.797      | 0.701      |
| 3                          | 0.965     | 0.682       | 0.835    | 0.822      | 0.740      |
| 4                          | 0.965     | 0.711       | 0.811    | 0.825      | 0.741      |
| 5                          | 0.965     | 0.713       | 0.808    | 0.825      | 0.741      |
| 6                          | 0.965     | 0.734       | 0.778    | 0.823      | 0.736      |
| 7                          | 0.965     | 0.744       | 0.772    | 0.825      | 0.738      |
| 8                          | 0.965     | 0.767       | 0.772    | 0.833      | 0.750      |
| 9                          | 0.968     | 0.775       | 0.769    | 0.836      | 0.754      |
| 10                         | 0.968     | 0.801       | 0.772    | 0.846      | 0.770      |
| 11                         | 0.965     | 0.829       | 0.763    | 0.853      | 0.779      |
| 12                         | 0.960     | 0.809       | 0.766    | 0.844      | 0.767      |
| 13                         | 0.960     | 0.814       | 0.781    | 0.851      | 0.776      |
| 14                         | 0.962     | 0.796       | 0.775    | 0.843      | 0.765      |
| 15                         | 0.962     | 0.832       | 0.760    | 0.852      | 0.778      |
| 16                         | 0.960     | 0.832       | 0.766    | 0.853      | 0.779      |
| 17                         | 0.960     | 0.835       | 0.763    | 0.853      | 0.779      |
| 18                         | 0.968     | 0.817       | 0.763    | 0.849      | 0.773      |
| 19                         | 0.962     | 0.817       | 0.763    | 0.847      | 0.771      |
| 20                         | 0.962     | 0.840       | 0.787    | 0.863      | 0.794      |
| 21                         | 0.962     | 0.822       | 0.778    | 0.854      | 0.780      |
| 22                         | 0.965     | 0.814       | 0.775    | 0.851      | 0.776      |
| 23                         | 0.954     | 0.806       | 0.766    | 0.842      | 0.762      |
| 24                         | 0.965     | 0.806       | 0.763    | 0.844      | 0.766      |
| 25                         | 0.960     | 0.791       | 0.743    | 0.830      | 0.745      |
| 26                         | 0.962     | 0.786       | 0.772    | 0.839      | 0.758      |
| 27                         | 0.962     | 0.796       | 0.778    | 0.844      | 0.767      |
| 28                         | 0.960     | 0.778       | 0.787    | 0.840      | 0.760      |
| 29                         | 0.960     | 0.786       | 0.799    | 0.846      | 0.770      |
| 30                         | 0.960     | 0.773       | 0.784    | 0.837      | 0.756      |

|    |       |       |       |       |       |
|----|-------|-------|-------|-------|-------|
| 31 | 0.965 | 0.773 | 0.787 | 0.840 | 0.760 |
| 32 | 0.962 | 0.778 | 0.781 | 0.839 | 0.759 |
| 33 | 0.962 | 0.788 | 0.778 | 0.842 | 0.762 |
| 34 | 0.962 | 0.786 | 0.769 | 0.838 | 0.757 |
| 35 | 0.965 | 0.778 | 0.754 | 0.831 | 0.747 |
| 36 | 0.965 | 0.770 | 0.778 | 0.836 | 0.754 |
| 37 | 0.962 | 0.783 | 0.763 | 0.835 | 0.752 |
| 38 | 0.962 | 0.804 | 0.766 | 0.843 | 0.765 |
| 39 | 0.965 | 0.806 | 0.778 | 0.849 | 0.773 |
| 40 | 0.968 | 0.798 | 0.784 | 0.849 | 0.774 |
| 41 | 0.965 | 0.811 | 0.775 | 0.850 | 0.775 |
| 42 | 0.965 | 0.806 | 0.790 | 0.853 | 0.779 |
| 43 | 0.962 | 0.798 | 0.781 | 0.846 | 0.769 |
| 44 | 0.962 | 0.809 | 0.805 | 0.858 | 0.786 |
| 45 | 0.962 | 0.814 | 0.790 | 0.855 | 0.782 |
| 46 | 0.965 | 0.804 | 0.790 | 0.852 | 0.778 |
| 47 | 0.962 | 0.806 | 0.790 | 0.852 | 0.778 |
| 48 | 0.965 | 0.801 | 0.781 | 0.848 | 0.772 |
| 49 | 0.965 | 0.809 | 0.781 | 0.851 | 0.776 |
| 50 | 0.968 | 0.801 | 0.787 | 0.851 | 0.777 |
| 51 | 0.965 | 0.798 | 0.790 | 0.850 | 0.775 |
| 52 | 0.965 | 0.804 | 0.781 | 0.849 | 0.774 |
| 53 | 0.968 | 0.804 | 0.781 | 0.850 | 0.775 |
| 54 | 0.971 | 0.806 | 0.778 | 0.851 | 0.776 |
| 55 | 0.968 | 0.806 | 0.787 | 0.853 | 0.779 |
| 56 | 0.968 | 0.809 | 0.787 | 0.854 | 0.781 |
| 57 | 0.968 | 0.811 | 0.787 | 0.855 | 0.782 |
| 58 | 0.968 | 0.806 | 0.793 | 0.855 | 0.782 |
| 59 | 0.968 | 0.806 | 0.787 | 0.853 | 0.779 |
| 60 | 0.968 | 0.809 | 0.790 | 0.855 | 0.782 |
| 61 | 0.968 | 0.809 | 0.787 | 0.854 | 0.781 |
| 62 | 0.968 | 0.811 | 0.787 | 0.855 | 0.782 |
| 63 | 0.971 | 0.817 | 0.796 | 0.860 | 0.790 |
| 64 | 0.971 | 0.809 | 0.805 | 0.860 | 0.791 |
| 65 | 0.971 | 0.819 | 0.808 | 0.865 | 0.798 |
| 66 | 0.971 | 0.819 | 0.808 | 0.865 | 0.798 |
| 67 | 0.971 | 0.822 | 0.793 | 0.861 | 0.792 |
| 68 | 0.968 | 0.819 | 0.799 | 0.861 | 0.792 |
| 69 | 0.974 | 0.817 | 0.814 | 0.867 | 0.801 |
| 70 | 0.971 | 0.811 | 0.817 | 0.865 | 0.798 |
| 71 | 0.971 | 0.814 | 0.817 | 0.866 | 0.799 |
| 72 | 0.968 | 0.806 | 0.814 | 0.861 | 0.792 |

|     |       |       |       |       |       |
|-----|-------|-------|-------|-------|-------|
| 73  | 0.968 | 0.804 | 0.820 | 0.862 | 0.794 |
| 74  | 0.971 | 0.801 | 0.811 | 0.859 | 0.789 |
| 75  | 0.968 | 0.806 | 0.799 | 0.857 | 0.785 |
| 76  | 0.965 | 0.814 | 0.796 | 0.858 | 0.786 |
| 77  | 0.965 | 0.811 | 0.799 | 0.858 | 0.786 |
| 78  | 0.962 | 0.814 | 0.802 | 0.858 | 0.788 |
| 79  | 0.962 | 0.809 | 0.802 | 0.857 | 0.785 |
| 80  | 0.962 | 0.811 | 0.805 | 0.858 | 0.788 |
| 81  | 0.962 | 0.811 | 0.802 | 0.858 | 0.786 |
| 82  | 0.962 | 0.819 | 0.805 | 0.861 | 0.792 |
| 83  | 0.965 | 0.837 | 0.805 | 0.869 | 0.803 |
| 84  | 0.965 | 0.840 | 0.808 | 0.871 | 0.806 |
| 85  | 0.965 | 0.837 | 0.805 | 0.869 | 0.803 |
| 86  | 0.965 | 0.835 | 0.805 | 0.868 | 0.802 |
| 87  | 0.971 | 0.819 | 0.805 | 0.864 | 0.796 |
| 88  | 0.971 | 0.819 | 0.808 | 0.865 | 0.798 |
| 89  | 0.971 | 0.814 | 0.808 | 0.863 | 0.795 |
| 90  | 0.968 | 0.837 | 0.802 | 0.869 | 0.803 |
| 91  | 0.968 | 0.837 | 0.802 | 0.869 | 0.803 |
| 92  | 0.968 | 0.835 | 0.808 | 0.870 | 0.804 |
| 93  | 0.968 | 0.835 | 0.808 | 0.870 | 0.804 |
| 94  | 0.968 | 0.827 | 0.805 | 0.866 | 0.799 |
| 95  | 0.968 | 0.829 | 0.805 | 0.867 | 0.800 |
| 96  | 0.968 | 0.819 | 0.805 | 0.863 | 0.795 |
| 97  | 0.968 | 0.824 | 0.802 | 0.864 | 0.796 |
| 98  | 0.968 | 0.827 | 0.802 | 0.865 | 0.797 |
| 99  | 0.971 | 0.822 | 0.811 | 0.867 | 0.800 |
| 100 | 0.971 | 0.811 | 0.811 | 0.863 | 0.795 |
| 101 | 0.974 | 0.817 | 0.817 | 0.868 | 0.802 |
| 102 | 0.968 | 0.814 | 0.808 | 0.862 | 0.793 |
| 103 | 0.968 | 0.822 | 0.799 | 0.862 | 0.793 |
| 104 | 0.965 | 0.817 | 0.796 | 0.858 | 0.788 |
| 105 | 0.965 | 0.811 | 0.796 | 0.857 | 0.785 |
| 106 | 0.965 | 0.824 | 0.796 | 0.861 | 0.792 |
| 107 | 0.968 | 0.819 | 0.799 | 0.861 | 0.792 |
| 108 | 0.965 | 0.822 | 0.799 | 0.861 | 0.792 |
| 109 | 0.965 | 0.819 | 0.799 | 0.860 | 0.790 |
| 110 | 0.962 | 0.814 | 0.787 | 0.854 | 0.781 |
| 111 | 0.962 | 0.829 | 0.802 | 0.864 | 0.796 |
| 112 | 0.962 | 0.817 | 0.805 | 0.860 | 0.791 |
| 113 | 0.962 | 0.819 | 0.805 | 0.861 | 0.792 |
| 114 | 0.968 | 0.809 | 0.805 | 0.859 | 0.789 |

|     |       |       |       |       |       |
|-----|-------|-------|-------|-------|-------|
| 115 | 0.968 | 0.809 | 0.805 | 0.859 | 0.789 |
| 116 | 0.968 | 0.817 | 0.802 | 0.861 | 0.792 |
| 117 | 0.974 | 0.827 | 0.808 | 0.869 | 0.803 |
| 118 | 0.962 | 0.827 | 0.814 | 0.867 | 0.800 |
| 119 | 0.965 | 0.827 | 0.814 | 0.868 | 0.802 |
| 120 | 0.965 | 0.827 | 0.817 | 0.869 | 0.803 |
| 121 | 0.965 | 0.827 | 0.817 | 0.869 | 0.803 |
| 122 | 0.962 | 0.827 | 0.817 | 0.868 | 0.802 |
| 123 | 0.962 | 0.827 | 0.817 | 0.868 | 0.802 |
| 124 | 0.960 | 0.827 | 0.811 | 0.865 | 0.797 |
| 125 | 0.960 | 0.827 | 0.814 | 0.866 | 0.799 |
| 126 | 0.960 | 0.827 | 0.814 | 0.866 | 0.799 |
| 127 | 0.960 | 0.827 | 0.817 | 0.867 | 0.800 |
| 128 | 0.960 | 0.835 | 0.817 | 0.870 | 0.804 |
| 129 | 0.960 | 0.840 | 0.808 | 0.869 | 0.803 |
| 130 | 0.960 | 0.837 | 0.808 | 0.868 | 0.802 |
| 131 | 0.951 | 0.824 | 0.817 | 0.863 | 0.795 |
| 132 | 0.951 | 0.824 | 0.817 | 0.863 | 0.795 |
| 133 | 0.962 | 0.814 | 0.808 | 0.860 | 0.791 |
| 134 | 0.962 | 0.814 | 0.811 | 0.861 | 0.792 |
| 135 | 0.962 | 0.817 | 0.811 | 0.862 | 0.793 |
| 136 | 0.965 | 0.811 | 0.826 | 0.866 | 0.799 |
| 137 | 0.962 | 0.811 | 0.823 | 0.864 | 0.797 |
| 138 | 0.962 | 0.811 | 0.826 | 0.865 | 0.798 |
| 139 | 0.962 | 0.811 | 0.817 | 0.862 | 0.794 |
| 140 | 0.965 | 0.819 | 0.820 | 0.867 | 0.801 |
| 141 | 0.965 | 0.819 | 0.820 | 0.867 | 0.801 |
| 142 | 0.968 | 0.824 | 0.814 | 0.868 | 0.802 |
| 143 | 0.965 | 0.824 | 0.820 | 0.869 | 0.803 |
| 144 | 0.965 | 0.824 | 0.805 | 0.864 | 0.796 |
| 145 | 0.965 | 0.824 | 0.808 | 0.865 | 0.798 |
| 146 | 0.971 | 0.824 | 0.814 | 0.869 | 0.803 |
| 147 | 0.971 | 0.824 | 0.814 | 0.869 | 0.803 |
| 148 | 0.971 | 0.824 | 0.814 | 0.869 | 0.803 |
| 149 | 0.971 | 0.829 | 0.820 | 0.873 | 0.809 |
| 150 | 0.971 | 0.829 | 0.817 | 0.872 | 0.807 |
| 151 | 0.968 | 0.829 | 0.811 | 0.869 | 0.803 |
| 152 | 0.968 | 0.822 | 0.811 | 0.866 | 0.799 |
| 153 | 0.968 | 0.822 | 0.811 | 0.866 | 0.799 |
| 154 | 0.968 | 0.822 | 0.814 | 0.867 | 0.800 |
| 155 | 0.968 | 0.822 | 0.814 | 0.867 | 0.800 |
| 156 | 0.968 | 0.822 | 0.814 | 0.867 | 0.800 |



|     |       |       |       |       |       |
|-----|-------|-------|-------|-------|-------|
| 157 | 0.968 | 0.827 | 0.814 | 0.869 | 0.803 |
| 158 | 0.971 | 0.822 | 0.814 | 0.868 | 0.802 |
| 159 | 0.971 | 0.827 | 0.811 | 0.869 | 0.803 |
| 160 | 0.971 | 0.827 | 0.811 | 0.869 | 0.803 |
| 161 | 0.971 | 0.822 | 0.814 | 0.868 | 0.802 |
| 162 | 0.968 | 0.837 | 0.817 | 0.873 | 0.810 |
| 163 | 0.968 | 0.832 | 0.808 | 0.869 | 0.803 |
| 164 | 0.968 | 0.829 | 0.811 | 0.869 | 0.803 |
| 165 | 0.968 | 0.832 | 0.811 | 0.870 | 0.804 |
| 166 | 0.968 | 0.829 | 0.811 | 0.869 | 0.803 |
| 167 | 0.968 | 0.832 | 0.811 | 0.870 | 0.804 |
| 168 | 0.965 | 0.824 | 0.808 | 0.865 | 0.798 |
| 169 | 0.965 | 0.822 | 0.808 | 0.864 | 0.796 |
| 170 | 0.965 | 0.822 | 0.808 | 0.864 | 0.796 |
| 171 | 0.965 | 0.822 | 0.805 | 0.863 | 0.795 |
| 172 | 0.965 | 0.824 | 0.805 | 0.864 | 0.796 |
| 173 | 0.965 | 0.824 | 0.823 | 0.870 | 0.805 |
| 174 | 0.965 | 0.822 | 0.823 | 0.869 | 0.803 |
| 175 | 0.965 | 0.822 | 0.820 | 0.868 | 0.802 |
| 176 | 0.965 | 0.819 | 0.820 | 0.867 | 0.801 |
| 177 | 0.965 | 0.819 | 0.820 | 0.867 | 0.801 |
| 178 | 0.965 | 0.819 | 0.814 | 0.865 | 0.798 |
| 179 | 0.974 | 0.837 | 0.814 | 0.874 | 0.812 |
| 180 | 0.974 | 0.842 | 0.811 | 0.875 | 0.813 |
| 181 | 0.974 | 0.850 | 0.808 | 0.877 | 0.816 |
| 182 | 0.968 | 0.837 | 0.820 | 0.874 | 0.812 |
| 183 | 0.968 | 0.837 | 0.820 | 0.874 | 0.812 |
| 184 | 0.968 | 0.829 | 0.820 | 0.872 | 0.807 |
| 185 | 0.968 | 0.835 | 0.820 | 0.873 | 0.810 |
| 186 | 0.968 | 0.837 | 0.817 | 0.873 | 0.810 |
| 187 | 0.968 | 0.832 | 0.814 | 0.871 | 0.806 |
| 188 | 0.968 | 0.835 | 0.817 | 0.873 | 0.809 |
| 189 | 0.968 | 0.832 | 0.820 | 0.873 | 0.809 |
| 190 | 0.968 | 0.835 | 0.817 | 0.873 | 0.809 |
| 191 | 0.968 | 0.837 | 0.823 | 0.875 | 0.813 |
| 192 | 0.968 | 0.835 | 0.817 | 0.873 | 0.809 |
| 193 | 0.971 | 0.832 | 0.817 | 0.873 | 0.809 |
| 194 | 0.968 | 0.829 | 0.820 | 0.872 | 0.807 |
| 195 | 0.968 | 0.842 | 0.823 | 0.877 | 0.816 |
| 196 | 0.971 | 0.848 | 0.823 | 0.880 | 0.820 |
| 197 | 0.971 | 0.848 | 0.823 | 0.880 | 0.820 |
| 198 | 0.971 | 0.850 | 0.832 | 0.884 | 0.826 |

|     |       |       |       |       |       |
|-----|-------|-------|-------|-------|-------|
| 199 | 0.974 | 0.853 | 0.835 | 0.887 | 0.830 |
| 200 | 0.974 | 0.848 | 0.835 | 0.885 | 0.827 |
| 201 | 0.974 | 0.848 | 0.835 | 0.885 | 0.827 |
| 202 | 0.974 | 0.855 | 0.829 | 0.886 | 0.828 |
| 203 | 0.974 | 0.845 | 0.832 | 0.883 | 0.824 |
| 204 | 0.974 | 0.845 | 0.832 | 0.883 | 0.824 |
| 205 | 0.974 | 0.845 | 0.829 | 0.882 | 0.823 |
| 206 | 0.974 | 0.845 | 0.829 | 0.882 | 0.823 |
| 207 | 0.974 | 0.848 | 0.826 | 0.882 | 0.823 |
| 208 | 0.974 | 0.842 | 0.829 | 0.881 | 0.822 |
| 209 | 0.974 | 0.848 | 0.826 | 0.882 | 0.823 |
| 210 | 0.974 | 0.853 | 0.832 | 0.886 | 0.828 |
| 211 | 0.974 | 0.853 | 0.838 | 0.888 | 0.831 |
| 212 | 0.974 | 0.850 | 0.838 | 0.887 | 0.830 |
| 213 | 0.974 | 0.853 | 0.823 | 0.883 | 0.824 |
| 214 | 0.974 | 0.853 | 0.826 | 0.884 | 0.826 |
| 215 | 0.974 | 0.853 | 0.826 | 0.884 | 0.826 |
| 216 | 0.974 | 0.842 | 0.826 | 0.880 | 0.820 |
| 217 | 0.974 | 0.840 | 0.823 | 0.878 | 0.817 |
| 218 | 0.974 | 0.837 | 0.823 | 0.877 | 0.816 |
| 219 | 0.974 | 0.837 | 0.823 | 0.877 | 0.816 |
| 220 | 0.974 | 0.837 | 0.823 | 0.877 | 0.816 |
| 221 | 0.974 | 0.837 | 0.823 | 0.877 | 0.816 |
| 222 | 0.974 | 0.837 | 0.820 | 0.876 | 0.814 |
| 223 | 0.974 | 0.840 | 0.820 | 0.877 | 0.816 |
| 224 | 0.974 | 0.842 | 0.820 | 0.878 | 0.817 |
| 225 | 0.974 | 0.845 | 0.820 | 0.879 | 0.819 |
| 226 | 0.974 | 0.842 | 0.817 | 0.877 | 0.816 |
| 227 | 0.974 | 0.842 | 0.820 | 0.878 | 0.817 |
| 228 | 0.971 | 0.840 | 0.814 | 0.874 | 0.812 |
| 229 | 0.971 | 0.837 | 0.823 | 0.876 | 0.815 |
| 230 | 0.971 | 0.840 | 0.823 | 0.877 | 0.816 |
| 231 | 0.971 | 0.840 | 0.820 | 0.876 | 0.814 |
| 232 | 0.971 | 0.840 | 0.817 | 0.875 | 0.813 |
| 233 | 0.971 | 0.840 | 0.820 | 0.876 | 0.814 |
| 234 | 0.971 | 0.837 | 0.820 | 0.875 | 0.813 |
| 235 | 0.971 | 0.840 | 0.820 | 0.876 | 0.814 |
| 236 | 0.971 | 0.840 | 0.820 | 0.876 | 0.814 |
| 237 | 0.971 | 0.840 | 0.817 | 0.875 | 0.813 |
| 238 | 0.971 | 0.837 | 0.814 | 0.873 | 0.810 |
| 239 | 0.971 | 0.837 | 0.817 | 0.874 | 0.812 |
| 240 | 0.971 | 0.840 | 0.817 | 0.875 | 0.813 |

|     |       |       |       |       |       |
|-----|-------|-------|-------|-------|-------|
| 241 | 0.977 | 0.850 | 0.817 | 0.881 | 0.821 |
| 242 | 0.977 | 0.850 | 0.817 | 0.881 | 0.821 |
| 243 | 0.977 | 0.855 | 0.823 | 0.885 | 0.827 |
| 244 | 0.977 | 0.850 | 0.820 | 0.882 | 0.823 |
| 245 | 0.977 | 0.850 | 0.820 | 0.882 | 0.823 |
| 246 | 0.977 | 0.850 | 0.823 | 0.883 | 0.824 |
| 247 | 0.977 | 0.850 | 0.823 | 0.883 | 0.824 |
| 248 | 0.977 | 0.855 | 0.820 | 0.884 | 0.826 |
| 249 | 0.977 | 0.850 | 0.823 | 0.883 | 0.824 |
| 250 | 0.977 | 0.848 | 0.826 | 0.883 | 0.824 |
| 251 | 0.977 | 0.850 | 0.826 | 0.884 | 0.826 |
| 252 | 0.974 | 0.850 | 0.823 | 0.882 | 0.823 |
| 253 | 0.974 | 0.848 | 0.823 | 0.881 | 0.821 |
| 254 | 0.974 | 0.850 | 0.823 | 0.882 | 0.823 |
| 255 | 0.974 | 0.850 | 0.823 | 0.882 | 0.823 |
| 256 | 0.974 | 0.842 | 0.823 | 0.879 | 0.819 |
| 257 | 0.974 | 0.842 | 0.823 | 0.879 | 0.819 |
| 258 | 0.977 | 0.842 | 0.823 | 0.880 | 0.820 |
| 259 | 0.977 | 0.848 | 0.817 | 0.880 | 0.820 |
| 260 | 0.977 | 0.853 | 0.820 | 0.883 | 0.824 |
| 261 | 0.977 | 0.848 | 0.820 | 0.881 | 0.821 |
| 262 | 0.977 | 0.848 | 0.820 | 0.881 | 0.821 |
| 263 | 0.977 | 0.853 | 0.817 | 0.882 | 0.823 |
| 264 | 0.971 | 0.860 | 0.817 | 0.883 | 0.824 |
| 265 | 0.971 | 0.860 | 0.817 | 0.883 | 0.824 |
| 266 | 0.971 | 0.860 | 0.817 | 0.883 | 0.824 |
| 267 | 0.971 | 0.863 | 0.811 | 0.882 | 0.823 |
| 268 | 0.971 | 0.863 | 0.811 | 0.882 | 0.823 |
| 269 | 0.971 | 0.863 | 0.814 | 0.883 | 0.824 |
| 270 | 0.971 | 0.868 | 0.820 | 0.887 | 0.830 |
| 271 | 0.971 | 0.868 | 0.814 | 0.885 | 0.827 |
| 272 | 0.971 | 0.868 | 0.820 | 0.887 | 0.830 |
| 273 | 0.971 | 0.868 | 0.820 | 0.887 | 0.830 |
| 274 | 0.971 | 0.868 | 0.823 | 0.888 | 0.831 |
| 275 | 0.971 | 0.868 | 0.823 | 0.888 | 0.831 |
| 276 | 0.974 | 0.850 | 0.826 | 0.883 | 0.824 |
| 277 | 0.974 | 0.855 | 0.823 | 0.884 | 0.825 |
| 278 | 0.974 | 0.853 | 0.823 | 0.883 | 0.824 |
| 279 | 0.974 | 0.853 | 0.829 | 0.885 | 0.827 |
| 280 | 0.974 | 0.848 | 0.829 | 0.883 | 0.824 |
| 281 | 0.974 | 0.853 | 0.826 | 0.884 | 0.826 |
| 282 | 0.974 | 0.853 | 0.826 | 0.884 | 0.826 |

|     |       |       |       |       |       |
|-----|-------|-------|-------|-------|-------|
| 283 | 0.974 | 0.850 | 0.826 | 0.883 | 0.824 |
| 284 | 0.974 | 0.850 | 0.826 | 0.883 | 0.824 |
| 285 | 0.974 | 0.853 | 0.829 | 0.885 | 0.827 |
| 286 | 0.974 | 0.853 | 0.829 | 0.885 | 0.827 |
| 287 | 0.977 | 0.853 | 0.814 | 0.881 | 0.821 |
| 288 | 0.977 | 0.858 | 0.826 | 0.887 | 0.830 |
| 289 | 0.977 | 0.855 | 0.826 | 0.886 | 0.828 |
| 290 | 0.977 | 0.858 | 0.826 | 0.887 | 0.830 |
| 291 | 0.977 | 0.858 | 0.826 | 0.887 | 0.830 |
| 292 | 0.980 | 0.858 | 0.829 | 0.888 | 0.833 |
| 293 | 0.980 | 0.860 | 0.826 | 0.888 | 0.833 |
| 294 | 0.980 | 0.860 | 0.826 | 0.888 | 0.833 |
| 295 | 0.980 | 0.858 | 0.823 | 0.887 | 0.830 |
| 296 | 0.974 | 0.858 | 0.832 | 0.888 | 0.831 |
| 297 | 0.974 | 0.858 | 0.832 | 0.888 | 0.831 |
| 298 | 0.974 | 0.858 | 0.832 | 0.888 | 0.831 |
| 299 | 0.974 | 0.858 | 0.829 | 0.887 | 0.830 |
| 300 | 0.980 | 0.860 | 0.841 | 0.893 | 0.840 |
| 301 | 0.980 | 0.860 | 0.841 | 0.893 | 0.840 |
| 302 | 0.977 | 0.855 | 0.835 | 0.888 | 0.833 |
| 303 | 0.977 | 0.853 | 0.838 | 0.888 | 0.833 |
| 304 | 0.977 | 0.853 | 0.835 | 0.888 | 0.831 |
| 305 | 0.977 | 0.853 | 0.838 | 0.888 | 0.833 |
| 306 | 0.977 | 0.853 | 0.838 | 0.888 | 0.833 |
| 307 | 0.977 | 0.853 | 0.838 | 0.888 | 0.833 |
| 308 | 0.977 | 0.855 | 0.838 | 0.889 | 0.834 |
| 309 | 0.977 | 0.855 | 0.838 | 0.889 | 0.834 |
| 310 | 0.977 | 0.853 | 0.838 | 0.888 | 0.833 |
| 311 | 0.977 | 0.853 | 0.838 | 0.888 | 0.833 |
| 312 | 0.977 | 0.853 | 0.838 | 0.888 | 0.833 |
| 313 | 0.977 | 0.853 | 0.838 | 0.888 | 0.833 |
| 314 | 0.977 | 0.853 | 0.838 | 0.888 | 0.833 |
| 315 | 0.977 | 0.853 | 0.841 | 0.889 | 0.834 |
| 316 | 0.977 | 0.853 | 0.841 | 0.889 | 0.834 |
| 317 | 0.977 | 0.848 | 0.841 | 0.888 | 0.831 |
| 318 | 0.977 | 0.853 | 0.832 | 0.887 | 0.830 |
| 319 | 0.968 | 0.863 | 0.838 | 0.889 | 0.834 |
| 320 | 0.974 | 0.863 | 0.838 | 0.891 | 0.837 |
| 321 | 0.974 | 0.863 | 0.838 | 0.891 | 0.837 |
| 322 | 0.974 | 0.866 | 0.838 | 0.892 | 0.838 |
| 323 | 0.974 | 0.860 | 0.838 | 0.890 | 0.835 |
| 324 | 0.974 | 0.860 | 0.841 | 0.891 | 0.837 |

|     |       |       |       |       |       |
|-----|-------|-------|-------|-------|-------|
| 325 | 0.974 | 0.860 | 0.841 | 0.891 | 0.837 |
| 326 | 0.974 | 0.863 | 0.841 | 0.892 | 0.838 |
| 327 | 0.971 | 0.866 | 0.841 | 0.892 | 0.838 |
| 328 | 0.971 | 0.863 | 0.841 | 0.891 | 0.837 |
| 329 | 0.971 | 0.863 | 0.841 | 0.891 | 0.837 |
| 330 | 0.971 | 0.863 | 0.841 | 0.891 | 0.837 |
| 331 | 0.971 | 0.868 | 0.844 | 0.894 | 0.841 |
| 332 | 0.971 | 0.868 | 0.844 | 0.894 | 0.841 |
| 333 | 0.971 | 0.868 | 0.844 | 0.894 | 0.841 |
| 334 | 0.971 | 0.868 | 0.844 | 0.894 | 0.841 |
| 335 | 0.971 | 0.866 | 0.841 | 0.892 | 0.838 |
| 336 | 0.971 | 0.871 | 0.841 | 0.894 | 0.841 |
| 337 | 0.971 | 0.871 | 0.841 | 0.894 | 0.841 |
| 338 | 0.980 | 0.855 | 0.841 | 0.891 | 0.837 |
| 339 | 0.980 | 0.858 | 0.832 | 0.889 | 0.834 |
| 340 | 0.980 | 0.858 | 0.832 | 0.889 | 0.834 |
| 341 | 0.980 | 0.850 | 0.829 | 0.886 | 0.828 |
| 342 | 0.980 | 0.850 | 0.835 | 0.888 | 0.831 |
| 343 | 0.980 | 0.848 | 0.832 | 0.886 | 0.828 |
| 344 | 0.980 | 0.848 | 0.832 | 0.886 | 0.828 |
| 345 | 0.980 | 0.845 | 0.835 | 0.886 | 0.828 |
| 346 | 0.980 | 0.842 | 0.835 | 0.885 | 0.827 |
| 347 | 0.980 | 0.845 | 0.832 | 0.885 | 0.827 |
| 348 | 0.980 | 0.840 | 0.829 | 0.882 | 0.823 |
| 349 | 0.980 | 0.845 | 0.832 | 0.885 | 0.827 |
| 350 | 0.980 | 0.845 | 0.832 | 0.885 | 0.827 |
| 351 | 0.980 | 0.845 | 0.832 | 0.885 | 0.827 |
| 352 | 0.980 | 0.845 | 0.832 | 0.885 | 0.827 |
| 353 | 0.980 | 0.845 | 0.832 | 0.885 | 0.827 |
| 354 | 0.980 | 0.848 | 0.835 | 0.887 | 0.830 |
| 355 | 0.980 | 0.845 | 0.835 | 0.886 | 0.828 |
| 356 | 0.980 | 0.842 | 0.832 | 0.884 | 0.826 |
| 357 | 0.980 | 0.845 | 0.832 | 0.885 | 0.827 |
| 358 | 0.980 | 0.845 | 0.835 | 0.886 | 0.828 |
| 359 | 0.980 | 0.840 | 0.832 | 0.883 | 0.824 |
| 360 | 0.980 | 0.840 | 0.835 | 0.884 | 0.826 |
| 361 | 0.980 | 0.840 | 0.823 | 0.880 | 0.820 |
| 362 | 0.980 | 0.842 | 0.826 | 0.882 | 0.823 |
| 363 | 0.980 | 0.845 | 0.835 | 0.886 | 0.828 |
| 364 | 0.980 | 0.848 | 0.838 | 0.888 | 0.831 |
| 365 | 0.980 | 0.848 | 0.838 | 0.888 | 0.831 |
| 366 | 0.980 | 0.845 | 0.838 | 0.887 | 0.830 |

|     |       |       |       |       |       |
|-----|-------|-------|-------|-------|-------|
| 367 | 0.980 | 0.848 | 0.844 | 0.889 | 0.834 |
| 368 | 0.980 | 0.848 | 0.844 | 0.889 | 0.834 |
| 369 | 0.980 | 0.848 | 0.844 | 0.889 | 0.834 |
| 370 | 0.980 | 0.848 | 0.844 | 0.889 | 0.834 |
| 371 | 0.980 | 0.848 | 0.844 | 0.889 | 0.834 |
| 372 | 0.980 | 0.848 | 0.844 | 0.889 | 0.834 |
| 373 | 0.980 | 0.858 | 0.844 | 0.893 | 0.840 |
| 374 | 0.980 | 0.858 | 0.844 | 0.893 | 0.840 |
| 375 | 0.980 | 0.860 | 0.844 | 0.894 | 0.841 |
| 376 | 0.980 | 0.860 | 0.844 | 0.894 | 0.841 |
| 377 | 0.980 | 0.868 | 0.835 | 0.894 | 0.841 |
| 378 | 0.980 | 0.868 | 0.835 | 0.894 | 0.841 |
| 379 | 0.980 | 0.866 | 0.835 | 0.893 | 0.839 |
| 380 | 0.980 | 0.866 | 0.835 | 0.893 | 0.839 |
| 381 | 0.980 | 0.871 | 0.841 | 0.897 | 0.845 |
| 382 | 0.980 | 0.871 | 0.844 | 0.898 | 0.847 |
| 383 | 0.980 | 0.871 | 0.844 | 0.898 | 0.847 |
| 384 | 0.980 | 0.873 | 0.844 | 0.899 | 0.848 |
| 385 | 0.983 | 0.871 | 0.841 | 0.898 | 0.847 |
| 386 | 0.983 | 0.868 | 0.841 | 0.897 | 0.845 |
| 387 | 0.980 | 0.876 | 0.835 | 0.897 | 0.845 |
| 388 | 0.980 | 0.876 | 0.835 | 0.897 | 0.845 |
| 389 | 0.980 | 0.876 | 0.835 | 0.897 | 0.845 |
| 390 | 0.983 | 0.876 | 0.838 | 0.899 | 0.848 |
| 391 | 0.983 | 0.868 | 0.841 | 0.897 | 0.845 |
| 392 | 0.980 | 0.863 | 0.841 | 0.894 | 0.841 |
| 393 | 0.980 | 0.863 | 0.841 | 0.894 | 0.841 |
| 394 | 0.980 | 0.863 | 0.841 | 0.894 | 0.841 |
| 395 | 0.980 | 0.860 | 0.838 | 0.892 | 0.838 |
| 396 | 0.980 | 0.873 | 0.838 | 0.897 | 0.845 |
| 397 | 0.980 | 0.873 | 0.838 | 0.897 | 0.845 |
| 398 | 0.980 | 0.873 | 0.838 | 0.897 | 0.845 |
| 399 | 0.980 | 0.873 | 0.838 | 0.897 | 0.845 |
| 400 | 0.980 | 0.876 | 0.838 | 0.898 | 0.847 |
| 401 | 0.980 | 0.879 | 0.835 | 0.898 | 0.847 |
| 402 | 0.977 | 0.879 | 0.835 | 0.897 | 0.845 |
| 403 | 0.977 | 0.881 | 0.835 | 0.898 | 0.846 |
| 404 | 0.977 | 0.881 | 0.835 | 0.898 | 0.846 |
| 405 | 0.977 | 0.881 | 0.835 | 0.898 | 0.846 |
| 406 | 0.977 | 0.881 | 0.835 | 0.898 | 0.846 |
| 407 | 0.977 | 0.876 | 0.835 | 0.896 | 0.844 |
| 408 | 0.977 | 0.876 | 0.835 | 0.896 | 0.844 |

|     |       |       |       |       |       |
|-----|-------|-------|-------|-------|-------|
| 409 | 0.977 | 0.876 | 0.835 | 0.896 | 0.844 |
| 410 | 0.977 | 0.876 | 0.835 | 0.896 | 0.844 |
| 411 | 0.977 | 0.876 | 0.835 | 0.896 | 0.844 |
| 412 | 0.977 | 0.879 | 0.838 | 0.898 | 0.846 |
| 413 | 0.977 | 0.873 | 0.838 | 0.896 | 0.844 |
| 414 | 0.977 | 0.873 | 0.838 | 0.896 | 0.844 |
| 415 | 0.980 | 0.881 | 0.838 | 0.900 | 0.849 |
| 416 | 0.980 | 0.881 | 0.838 | 0.900 | 0.849 |
| 417 | 0.980 | 0.881 | 0.838 | 0.900 | 0.849 |
| 418 | 0.980 | 0.879 | 0.838 | 0.899 | 0.848 |
| 419 | 0.980 | 0.879 | 0.838 | 0.899 | 0.848 |
| 420 | 0.980 | 0.876 | 0.838 | 0.898 | 0.847 |
| 421 | 0.980 | 0.879 | 0.838 | 0.899 | 0.848 |
| 422 | 0.980 | 0.876 | 0.838 | 0.898 | 0.847 |
| 423 | 0.980 | 0.879 | 0.838 | 0.899 | 0.848 |
| 424 | 0.980 | 0.879 | 0.838 | 0.899 | 0.848 |
| 425 | 0.980 | 0.863 | 0.841 | 0.894 | 0.841 |
| 426 | 0.980 | 0.863 | 0.844 | 0.895 | 0.842 |
| 427 | 0.980 | 0.866 | 0.841 | 0.895 | 0.842 |
| 428 | 0.980 | 0.866 | 0.844 | 0.896 | 0.844 |
| 429 | 0.980 | 0.866 | 0.844 | 0.896 | 0.844 |
| 430 | 0.980 | 0.873 | 0.853 | 0.902 | 0.852 |
| 431 | 0.980 | 0.871 | 0.853 | 0.901 | 0.851 |
| 432 | 0.980 | 0.871 | 0.853 | 0.901 | 0.851 |
| 433 | 0.980 | 0.871 | 0.853 | 0.901 | 0.851 |
| 434 | 0.980 | 0.871 | 0.853 | 0.901 | 0.851 |
| 435 | 0.980 | 0.873 | 0.850 | 0.901 | 0.851 |
| 436 | 0.980 | 0.873 | 0.850 | 0.901 | 0.851 |
| 437 | 0.980 | 0.873 | 0.850 | 0.901 | 0.851 |
| 438 | 0.980 | 0.871 | 0.850 | 0.900 | 0.849 |
| 439 | 0.980 | 0.871 | 0.850 | 0.900 | 0.849 |
| 440 | 0.980 | 0.876 | 0.847 | 0.901 | 0.851 |
| 441 | 0.980 | 0.873 | 0.847 | 0.900 | 0.849 |
| 442 | 0.980 | 0.873 | 0.847 | 0.900 | 0.849 |
| 443 | 0.980 | 0.873 | 0.847 | 0.900 | 0.849 |
| 444 | 0.980 | 0.873 | 0.847 | 0.900 | 0.849 |
| 445 | 0.980 | 0.876 | 0.844 | 0.900 | 0.849 |
| 446 | 0.980 | 0.873 | 0.844 | 0.899 | 0.848 |
| 447 | 0.980 | 0.868 | 0.850 | 0.899 | 0.848 |
| 448 | 0.980 | 0.868 | 0.850 | 0.899 | 0.848 |
| 449 | 0.980 | 0.871 | 0.850 | 0.900 | 0.849 |
| 450 | 0.980 | 0.871 | 0.850 | 0.900 | 0.849 |

|     |       |       |       |       |       |
|-----|-------|-------|-------|-------|-------|
| 451 | 0.980 | 0.868 | 0.850 | 0.899 | 0.848 |
| 452 | 0.980 | 0.868 | 0.850 | 0.899 | 0.848 |
| 453 | 0.980 | 0.871 | 0.853 | 0.901 | 0.851 |
| 454 | 0.980 | 0.868 | 0.850 | 0.899 | 0.848 |
| 455 | 0.980 | 0.866 | 0.850 | 0.898 | 0.847 |
| 456 | 0.980 | 0.866 | 0.850 | 0.898 | 0.847 |
| 457 | 0.980 | 0.866 | 0.850 | 0.898 | 0.847 |
| 458 | 0.980 | 0.866 | 0.850 | 0.898 | 0.847 |
| 459 | 0.980 | 0.866 | 0.850 | 0.898 | 0.847 |
| 460 | 0.980 | 0.866 | 0.850 | 0.898 | 0.847 |
| 461 | 0.983 | 0.868 | 0.847 | 0.899 | 0.848 |
| 462 | 0.983 | 0.871 | 0.850 | 0.901 | 0.851 |
| 463 | 0.983 | 0.866 | 0.850 | 0.899 | 0.848 |
| 464 | 0.983 | 0.879 | 0.850 | 0.903 | 0.855 |
| 465 | 0.983 | 0.876 | 0.853 | 0.903 | 0.855 |
| 466 | 0.983 | 0.876 | 0.853 | 0.903 | 0.855 |
| 467 | 0.983 | 0.876 | 0.853 | 0.903 | 0.855 |
| 468 | 0.983 | 0.884 | 0.862 | 0.909 | 0.863 |
| 469 | 0.983 | 0.884 | 0.862 | 0.909 | 0.863 |
| 470 | 0.983 | 0.884 | 0.862 | 0.909 | 0.863 |
| 471 | 0.983 | 0.884 | 0.862 | 0.909 | 0.863 |
| 472 | 0.983 | 0.884 | 0.862 | 0.909 | 0.863 |
| 473 | 0.983 | 0.884 | 0.862 | 0.909 | 0.863 |
| 474 | 0.983 | 0.881 | 0.865 | 0.909 | 0.864 |
| 475 | 0.983 | 0.884 | 0.862 | 0.909 | 0.863 |
| 476 | 0.983 | 0.884 | 0.862 | 0.909 | 0.863 |
| 477 | 0.983 | 0.884 | 0.862 | 0.909 | 0.863 |
| 478 | 0.983 | 0.884 | 0.862 | 0.909 | 0.863 |
| 479 | 0.983 | 0.886 | 0.862 | 0.910 | 0.865 |
| 480 | 0.983 | 0.886 | 0.862 | 0.910 | 0.865 |
| 481 | 0.983 | 0.886 | 0.862 | 0.910 | 0.865 |
| 482 | 0.983 | 0.886 | 0.865 | 0.911 | 0.866 |
| 483 | 0.983 | 0.884 | 0.865 | 0.910 | 0.865 |
| 484 | 0.983 | 0.886 | 0.865 | 0.911 | 0.866 |
| 485 | 0.983 | 0.884 | 0.865 | 0.910 | 0.865 |
| 486 | 0.983 | 0.884 | 0.865 | 0.910 | 0.865 |
| 487 | 0.983 | 0.889 | 0.859 | 0.910 | 0.865 |
| 488 | 0.983 | 0.889 | 0.859 | 0.910 | 0.865 |
| 489 | 0.983 | 0.889 | 0.856 | 0.909 | 0.863 |
| 490 | 0.983 | 0.886 | 0.871 | 0.913 | 0.869 |
| 491 | 0.983 | 0.881 | 0.859 | 0.907 | 0.861 |
| 492 | 0.983 | 0.884 | 0.865 | 0.910 | 0.865 |



|     |       |       |       |       |       |
|-----|-------|-------|-------|-------|-------|
| 493 | 0.983 | 0.894 | 0.862 | 0.913 | 0.869 |
| 494 | 0.983 | 0.894 | 0.859 | 0.912 | 0.868 |
| 495 | 0.983 | 0.889 | 0.865 | 0.912 | 0.868 |
| 496 | 0.983 | 0.889 | 0.859 | 0.910 | 0.865 |
| 497 | 0.983 | 0.886 | 0.862 | 0.910 | 0.865 |
| 498 | 0.983 | 0.889 | 0.865 | 0.912 | 0.868 |
| 499 | 0.983 | 0.886 | 0.865 | 0.911 | 0.866 |
| 500 | 0.983 | 0.886 | 0.865 | 0.911 | 0.866 |
| 501 | 0.983 | 0.886 | 0.865 | 0.911 | 0.866 |
| 502 | 0.983 | 0.886 | 0.865 | 0.911 | 0.866 |
| 503 | 0.983 | 0.886 | 0.865 | 0.911 | 0.866 |
| 504 | 0.983 | 0.886 | 0.865 | 0.911 | 0.866 |
| 505 | 0.983 | 0.889 | 0.865 | 0.912 | 0.868 |
| 506 | 0.983 | 0.889 | 0.865 | 0.912 | 0.868 |
| 507 | 0.986 | 0.891 | 0.862 | 0.913 | 0.869 |
| 508 | 0.986 | 0.889 | 0.871 | 0.915 | 0.872 |
| 509 | 0.986 | 0.889 | 0.871 | 0.915 | 0.872 |
| 510 | 0.986 | 0.889 | 0.871 | 0.915 | 0.872 |
| 511 | 0.986 | 0.889 | 0.868 | 0.914 | 0.870 |
| 512 | 0.986 | 0.889 | 0.868 | 0.914 | 0.870 |
| 513 | 0.986 | 0.889 | 0.868 | 0.914 | 0.870 |
| 514 | 0.986 | 0.886 | 0.871 | 0.914 | 0.871 |
| 515 | 0.986 | 0.889 | 0.871 | 0.915 | 0.872 |
| 516 | 0.986 | 0.889 | 0.868 | 0.914 | 0.870 |
| 517 | 0.986 | 0.886 | 0.874 | 0.915 | 0.872 |
| 518 | 0.986 | 0.889 | 0.874 | 0.916 | 0.873 |
| 519 | 0.986 | 0.889 | 0.874 | 0.916 | 0.873 |
| 520 | 0.986 | 0.886 | 0.874 | 0.915 | 0.872 |
| 521 | 0.986 | 0.889 | 0.874 | 0.916 | 0.873 |
| 522 | 0.986 | 0.889 | 0.874 | 0.916 | 0.873 |
| 523 | 0.986 | 0.889 | 0.874 | 0.916 | 0.873 |
| 524 | 0.986 | 0.889 | 0.874 | 0.916 | 0.873 |
| 525 | 0.986 | 0.889 | 0.874 | 0.916 | 0.873 |
| 526 | 0.986 | 0.894 | 0.877 | 0.918 | 0.878 |
| 527 | 0.986 | 0.894 | 0.877 | 0.918 | 0.878 |
| 528 | 0.986 | 0.894 | 0.877 | 0.918 | 0.878 |
| 529 | 0.983 | 0.889 | 0.877 | 0.916 | 0.873 |
| 530 | 0.983 | 0.886 | 0.874 | 0.914 | 0.871 |
| 531 | 0.983 | 0.886 | 0.874 | 0.914 | 0.871 |
| 532 | 0.983 | 0.886 | 0.874 | 0.914 | 0.871 |
| 533 | 0.983 | 0.886 | 0.871 | 0.913 | 0.869 |
| 534 | 0.983 | 0.886 | 0.868 | 0.912 | 0.868 |

|     |       |       |       |       |       |
|-----|-------|-------|-------|-------|-------|
| 535 | 0.983 | 0.886 | 0.868 | 0.912 | 0.868 |
| 536 | 0.983 | 0.886 | 0.871 | 0.913 | 0.869 |
| 537 | 0.986 | 0.886 | 0.871 | 0.914 | 0.871 |
| 538 | 0.983 | 0.884 | 0.871 | 0.912 | 0.868 |
| 539 | 0.986 | 0.886 | 0.868 | 0.913 | 0.869 |
| 540 | 0.986 | 0.886 | 0.871 | 0.914 | 0.871 |
| 541 | 0.986 | 0.884 | 0.868 | 0.912 | 0.868 |
| 542 | 0.986 | 0.886 | 0.868 | 0.913 | 0.869 |
| 543 | 0.983 | 0.886 | 0.868 | 0.912 | 0.868 |
| 544 | 0.983 | 0.886 | 0.865 | 0.911 | 0.866 |
| 545 | 0.986 | 0.886 | 0.862 | 0.911 | 0.866 |
| 546 | 0.988 | 0.886 | 0.865 | 0.913 | 0.869 |
| 547 | 0.988 | 0.886 | 0.862 | 0.912 | 0.868 |
| 548 | 0.988 | 0.886 | 0.862 | 0.912 | 0.868 |
| 549 | 0.988 | 0.884 | 0.865 | 0.912 | 0.868 |
| 550 | 0.988 | 0.884 | 0.865 | 0.912 | 0.868 |
| 551 | 0.988 | 0.884 | 0.865 | 0.912 | 0.868 |
| 552 | 0.988 | 0.879 | 0.865 | 0.910 | 0.865 |
| 553 | 0.988 | 0.876 | 0.862 | 0.908 | 0.862 |
| 554 | 0.988 | 0.879 | 0.862 | 0.909 | 0.864 |
| 555 | 0.988 | 0.879 | 0.862 | 0.909 | 0.864 |
| 556 | 0.986 | 0.879 | 0.862 | 0.908 | 0.862 |
| 557 | 0.986 | 0.879 | 0.862 | 0.908 | 0.862 |
| 558 | 0.988 | 0.876 | 0.862 | 0.908 | 0.862 |
| 559 | 0.986 | 0.873 | 0.865 | 0.907 | 0.861 |
| 560 | 0.986 | 0.876 | 0.868 | 0.909 | 0.864 |
| 561 | 0.986 | 0.876 | 0.868 | 0.909 | 0.864 |
| 562 | 0.983 | 0.873 | 0.862 | 0.905 | 0.858 |
| 563 | 0.983 | 0.873 | 0.862 | 0.905 | 0.858 |
| 564 | 0.983 | 0.873 | 0.862 | 0.905 | 0.858 |
| 565 | 0.983 | 0.876 | 0.856 | 0.904 | 0.856 |
| 566 | 0.983 | 0.876 | 0.856 | 0.904 | 0.856 |
| 567 | 0.986 | 0.876 | 0.856 | 0.905 | 0.858 |
| 568 | 0.986 | 0.876 | 0.856 | 0.905 | 0.858 |
| 569 | 0.986 | 0.876 | 0.856 | 0.905 | 0.858 |
| 570 | 0.986 | 0.876 | 0.853 | 0.904 | 0.856 |
| 571 | 0.986 | 0.879 | 0.853 | 0.905 | 0.858 |
| 572 | 0.986 | 0.879 | 0.853 | 0.905 | 0.858 |
| 573 | 0.986 | 0.871 | 0.847 | 0.901 | 0.851 |
| 574 | 0.986 | 0.868 | 0.847 | 0.900 | 0.849 |
| 575 | 0.986 | 0.873 | 0.850 | 0.903 | 0.854 |
| 576 | 0.983 | 0.876 | 0.856 | 0.904 | 0.856 |

|     |       |       |       |       |       |
|-----|-------|-------|-------|-------|-------|
| 577 | 0.983 | 0.876 | 0.856 | 0.904 | 0.856 |
| 578 | 0.983 | 0.873 | 0.856 | 0.903 | 0.855 |
| 579 | 0.986 | 0.873 | 0.856 | 0.904 | 0.857 |
| 580 | 0.986 | 0.873 | 0.856 | 0.904 | 0.857 |
| 581 | 0.988 | 0.873 | 0.856 | 0.905 | 0.858 |
| 582 | 0.988 | 0.873 | 0.856 | 0.905 | 0.858 |
| 583 | 0.986 | 0.876 | 0.862 | 0.907 | 0.861 |
| 584 | 0.986 | 0.876 | 0.862 | 0.907 | 0.861 |
| 585 | 0.983 | 0.876 | 0.853 | 0.903 | 0.855 |
| 586 | 0.983 | 0.876 | 0.853 | 0.903 | 0.855 |
| 587 | 0.983 | 0.876 | 0.853 | 0.903 | 0.855 |
| 588 | 0.983 | 0.876 | 0.853 | 0.903 | 0.855 |
| 589 | 0.983 | 0.876 | 0.856 | 0.904 | 0.856 |
| 590 | 0.983 | 0.876 | 0.853 | 0.903 | 0.855 |
| 591 | 0.983 | 0.876 | 0.853 | 0.903 | 0.855 |
| 592 | 0.983 | 0.876 | 0.853 | 0.903 | 0.855 |
| 593 | 0.983 | 0.876 | 0.853 | 0.903 | 0.855 |
| 594 | 0.983 | 0.876 | 0.853 | 0.903 | 0.855 |
| 595 | 0.983 | 0.876 | 0.853 | 0.903 | 0.855 |
| 596 | 0.983 | 0.876 | 0.853 | 0.903 | 0.855 |
| 597 | 0.983 | 0.876 | 0.853 | 0.903 | 0.855 |
| 598 | 0.983 | 0.876 | 0.853 | 0.903 | 0.855 |
| 599 | 0.983 | 0.876 | 0.853 | 0.903 | 0.855 |
| 600 | 0.983 | 0.876 | 0.853 | 0.903 | 0.855 |
| 601 | 0.983 | 0.876 | 0.853 | 0.903 | 0.855 |
| 602 | 0.983 | 0.876 | 0.853 | 0.903 | 0.855 |
| 603 | 0.983 | 0.876 | 0.853 | 0.903 | 0.855 |
| 604 | 0.983 | 0.876 | 0.853 | 0.903 | 0.855 |
| 605 | 0.983 | 0.876 | 0.853 | 0.903 | 0.855 |
| 606 | 0.983 | 0.876 | 0.853 | 0.903 | 0.855 |
| 607 | 0.983 | 0.876 | 0.853 | 0.903 | 0.855 |
| 608 | 0.983 | 0.876 | 0.853 | 0.903 | 0.855 |
| 609 | 0.983 | 0.879 | 0.850 | 0.903 | 0.855 |
| 610 | 0.983 | 0.876 | 0.850 | 0.903 | 0.854 |
| 611 | 0.983 | 0.876 | 0.850 | 0.903 | 0.854 |
| 612 | 0.983 | 0.876 | 0.850 | 0.903 | 0.854 |
| 613 | 0.983 | 0.873 | 0.850 | 0.902 | 0.852 |
| 614 | 0.983 | 0.873 | 0.856 | 0.903 | 0.855 |
| 615 | 0.983 | 0.873 | 0.859 | 0.904 | 0.856 |
| 616 | 0.983 | 0.873 | 0.859 | 0.904 | 0.856 |
| 617 | 0.983 | 0.873 | 0.859 | 0.904 | 0.856 |
| 618 | 0.983 | 0.873 | 0.859 | 0.904 | 0.856 |

|     |       |       |       |       |       |
|-----|-------|-------|-------|-------|-------|
| 619 | 0.983 | 0.873 | 0.859 | 0.904 | 0.856 |
| 620 | 0.983 | 0.873 | 0.862 | 0.905 | 0.858 |
| 621 | 0.983 | 0.873 | 0.862 | 0.905 | 0.858 |
| 622 | 0.983 | 0.873 | 0.862 | 0.905 | 0.858 |
| 623 | 0.983 | 0.873 | 0.859 | 0.904 | 0.856 |
| 624 | 0.983 | 0.873 | 0.859 | 0.904 | 0.856 |
| 625 | 0.983 | 0.873 | 0.859 | 0.904 | 0.856 |
| 626 | 0.983 | 0.876 | 0.862 | 0.906 | 0.859 |
| 627 | 0.983 | 0.876 | 0.859 | 0.905 | 0.858 |
| 628 | 0.983 | 0.881 | 0.859 | 0.907 | 0.861 |
| 629 | 0.983 | 0.881 | 0.859 | 0.907 | 0.861 |
| 630 | 0.983 | 0.879 | 0.859 | 0.906 | 0.859 |
| 631 | 0.983 | 0.879 | 0.862 | 0.907 | 0.861 |
| 632 | 0.983 | 0.879 | 0.862 | 0.907 | 0.861 |
| 633 | 0.983 | 0.881 | 0.862 | 0.908 | 0.862 |
| 634 | 0.983 | 0.881 | 0.862 | 0.908 | 0.862 |
| 635 | 0.983 | 0.881 | 0.862 | 0.908 | 0.862 |
| 636 | 0.983 | 0.881 | 0.862 | 0.908 | 0.862 |
| 637 | 0.983 | 0.881 | 0.862 | 0.908 | 0.862 |
| 638 | 0.983 | 0.881 | 0.862 | 0.908 | 0.862 |
| 639 | 0.983 | 0.873 | 0.859 | 0.904 | 0.856 |
| 640 | 0.986 | 0.876 | 0.859 | 0.906 | 0.859 |
| 641 | 0.986 | 0.879 | 0.862 | 0.908 | 0.862 |
| 642 | 0.986 | 0.879 | 0.862 | 0.908 | 0.862 |
| 643 | 0.983 | 0.879 | 0.862 | 0.907 | 0.861 |
| 644 | 0.983 | 0.879 | 0.862 | 0.907 | 0.861 |
| 645 | 0.983 | 0.879 | 0.862 | 0.907 | 0.861 |
| 646 | 0.986 | 0.879 | 0.859 | 0.907 | 0.861 |
| 647 | 0.986 | 0.879 | 0.859 | 0.907 | 0.861 |
| 648 | 0.986 | 0.879 | 0.859 | 0.907 | 0.861 |
| 649 | 0.986 | 0.879 | 0.859 | 0.907 | 0.861 |
| 650 | 0.986 | 0.879 | 0.856 | 0.906 | 0.859 |
| 651 | 0.986 | 0.879 | 0.859 | 0.907 | 0.861 |
| 652 | 0.986 | 0.879 | 0.853 | 0.905 | 0.858 |
| 653 | 0.986 | 0.879 | 0.856 | 0.906 | 0.859 |
| 654 | 0.986 | 0.879 | 0.856 | 0.906 | 0.859 |
| 655 | 0.986 | 0.879 | 0.856 | 0.906 | 0.859 |
| 656 | 0.986 | 0.879 | 0.856 | 0.906 | 0.859 |
| 657 | 0.986 | 0.879 | 0.856 | 0.906 | 0.859 |
| 658 | 0.986 | 0.879 | 0.859 | 0.907 | 0.861 |
| 659 | 0.986 | 0.879 | 0.859 | 0.907 | 0.861 |
| 660 | 0.986 | 0.879 | 0.856 | 0.906 | 0.859 |

|     |       |       |       |       |       |
|-----|-------|-------|-------|-------|-------|
| 661 | 0.986 | 0.879 | 0.856 | 0.906 | 0.859 |
| 662 | 0.986 | 0.879 | 0.853 | 0.905 | 0.858 |
| 663 | 0.986 | 0.884 | 0.853 | 0.907 | 0.861 |
| 664 | 0.986 | 0.884 | 0.853 | 0.907 | 0.861 |
| 665 | 0.986 | 0.884 | 0.853 | 0.907 | 0.861 |
| 666 | 0.986 | 0.881 | 0.853 | 0.906 | 0.859 |
| 667 | 0.986 | 0.884 | 0.853 | 0.907 | 0.861 |
| 668 | 0.986 | 0.881 | 0.853 | 0.906 | 0.859 |
| 669 | 0.986 | 0.884 | 0.853 | 0.907 | 0.861 |
| 670 | 0.986 | 0.884 | 0.847 | 0.905 | 0.858 |
| 671 | 0.980 | 0.889 | 0.856 | 0.908 | 0.862 |
| 672 | 0.980 | 0.889 | 0.856 | 0.908 | 0.862 |
| 673 | 0.980 | 0.889 | 0.856 | 0.908 | 0.862 |
| 674 | 0.986 | 0.889 | 0.850 | 0.908 | 0.862 |
| 675 | 0.983 | 0.889 | 0.847 | 0.906 | 0.859 |
| 676 | 0.983 | 0.889 | 0.847 | 0.906 | 0.859 |
| 677 | 0.983 | 0.889 | 0.847 | 0.906 | 0.859 |
| 678 | 0.983 | 0.889 | 0.847 | 0.906 | 0.859 |
| 679 | 0.983 | 0.889 | 0.847 | 0.906 | 0.859 |
| 680 | 0.983 | 0.889 | 0.847 | 0.906 | 0.859 |
| 681 | 0.983 | 0.889 | 0.847 | 0.906 | 0.859 |
| 682 | 0.983 | 0.889 | 0.847 | 0.906 | 0.859 |
| 683 | 0.983 | 0.889 | 0.847 | 0.906 | 0.859 |
| 684 | 0.983 | 0.889 | 0.847 | 0.906 | 0.859 |
| 685 | 0.983 | 0.889 | 0.847 | 0.906 | 0.859 |
| 686 | 0.983 | 0.889 | 0.847 | 0.906 | 0.859 |
| 687 | 0.980 | 0.889 | 0.847 | 0.905 | 0.858 |
| 688 | 0.980 | 0.886 | 0.847 | 0.904 | 0.856 |
| 689 | 0.980 | 0.884 | 0.847 | 0.903 | 0.855 |
| 690 | 0.980 | 0.886 | 0.847 | 0.904 | 0.856 |
| 691 | 0.980 | 0.884 | 0.847 | 0.903 | 0.855 |
| 692 | 0.977 | 0.881 | 0.850 | 0.903 | 0.854 |
| 693 | 0.977 | 0.879 | 0.850 | 0.902 | 0.852 |
| 694 | 0.977 | 0.876 | 0.853 | 0.902 | 0.852 |
| 695 | 0.977 | 0.876 | 0.853 | 0.902 | 0.852 |
| 696 | 0.977 | 0.876 | 0.853 | 0.902 | 0.852 |
| 697 | 0.980 | 0.876 | 0.856 | 0.903 | 0.855 |
| 698 | 0.980 | 0.876 | 0.856 | 0.903 | 0.855 |
| 699 | 0.980 | 0.876 | 0.856 | 0.903 | 0.855 |
| 700 | 0.980 | 0.876 | 0.856 | 0.903 | 0.855 |
| 701 | 0.980 | 0.876 | 0.856 | 0.903 | 0.855 |
| 702 | 0.980 | 0.876 | 0.856 | 0.903 | 0.855 |

|     |       |       |       |       |       |
|-----|-------|-------|-------|-------|-------|
| 703 | 0.980 | 0.876 | 0.856 | 0.903 | 0.855 |
| 704 | 0.980 | 0.876 | 0.856 | 0.903 | 0.855 |
| 705 | 0.980 | 0.876 | 0.856 | 0.903 | 0.855 |
| 706 | 0.980 | 0.876 | 0.853 | 0.903 | 0.854 |
| 707 | 0.980 | 0.876 | 0.853 | 0.903 | 0.854 |
| 708 | 0.980 | 0.876 | 0.853 | 0.903 | 0.854 |
| 709 | 0.980 | 0.876 | 0.853 | 0.903 | 0.854 |
| 710 | 0.977 | 0.879 | 0.853 | 0.903 | 0.854 |
| 711 | 0.977 | 0.879 | 0.853 | 0.903 | 0.854 |
| 712 | 0.977 | 0.879 | 0.853 | 0.903 | 0.854 |
| 713 | 0.977 | 0.881 | 0.853 | 0.903 | 0.855 |
| 714 | 0.977 | 0.881 | 0.853 | 0.903 | 0.855 |
| 715 | 0.977 | 0.881 | 0.853 | 0.903 | 0.855 |
| 716 | 0.977 | 0.884 | 0.853 | 0.904 | 0.856 |
| 717 | 0.977 | 0.879 | 0.853 | 0.903 | 0.854 |
| 718 | 0.977 | 0.881 | 0.853 | 0.903 | 0.855 |
| 719 | 0.977 | 0.881 | 0.853 | 0.903 | 0.855 |
| 720 | 0.977 | 0.881 | 0.853 | 0.903 | 0.855 |
| 721 | 0.977 | 0.881 | 0.853 | 0.903 | 0.855 |
| 722 | 0.977 | 0.881 | 0.853 | 0.903 | 0.855 |
| 723 | 0.977 | 0.881 | 0.853 | 0.903 | 0.855 |
| 724 | 0.977 | 0.886 | 0.853 | 0.905 | 0.858 |
| 725 | 0.977 | 0.889 | 0.853 | 0.906 | 0.859 |
| 726 | 0.977 | 0.889 | 0.853 | 0.906 | 0.859 |
| 727 | 0.977 | 0.886 | 0.853 | 0.905 | 0.858 |
| 728 | 0.977 | 0.884 | 0.853 | 0.904 | 0.856 |
| 729 | 0.977 | 0.886 | 0.853 | 0.905 | 0.858 |
| 730 | 0.977 | 0.886 | 0.853 | 0.905 | 0.858 |
| 731 | 0.977 | 0.886 | 0.853 | 0.905 | 0.858 |
| 732 | 0.977 | 0.881 | 0.850 | 0.903 | 0.854 |
| 733 | 0.977 | 0.884 | 0.850 | 0.903 | 0.855 |
| 734 | 0.977 | 0.884 | 0.850 | 0.903 | 0.855 |
| 735 | 0.977 | 0.884 | 0.850 | 0.903 | 0.855 |
| 736 | 0.977 | 0.884 | 0.850 | 0.903 | 0.855 |
| 737 | 0.977 | 0.884 | 0.850 | 0.903 | 0.855 |
| 738 | 0.974 | 0.881 | 0.847 | 0.901 | 0.851 |
| 739 | 0.974 | 0.881 | 0.847 | 0.901 | 0.851 |
| 740 | 0.974 | 0.881 | 0.847 | 0.901 | 0.851 |
| 741 | 0.974 | 0.881 | 0.847 | 0.901 | 0.851 |
| 742 | 0.974 | 0.886 | 0.847 | 0.903 | 0.854 |
| 743 | 0.974 | 0.884 | 0.847 | 0.902 | 0.852 |
| 744 | 0.974 | 0.889 | 0.847 | 0.903 | 0.855 |

|     |       |       |       |       |       |
|-----|-------|-------|-------|-------|-------|
| 745 | 0.974 | 0.886 | 0.847 | 0.903 | 0.854 |
| 746 | 0.974 | 0.881 | 0.847 | 0.901 | 0.851 |
| 747 | 0.971 | 0.886 | 0.850 | 0.903 | 0.854 |
| 748 | 0.971 | 0.886 | 0.850 | 0.903 | 0.854 |
| 749 | 0.971 | 0.886 | 0.850 | 0.903 | 0.854 |
| 750 | 0.971 | 0.886 | 0.847 | 0.902 | 0.852 |
| 751 | 0.971 | 0.886 | 0.847 | 0.902 | 0.852 |
| 752 | 0.971 | 0.884 | 0.847 | 0.901 | 0.851 |
| 753 | 0.971 | 0.886 | 0.847 | 0.902 | 0.852 |
| 754 | 0.971 | 0.886 | 0.847 | 0.902 | 0.852 |
| 755 | 0.971 | 0.889 | 0.850 | 0.903 | 0.855 |
| 756 | 0.971 | 0.889 | 0.850 | 0.903 | 0.855 |
| 757 | 0.971 | 0.889 | 0.847 | 0.903 | 0.853 |
| 758 | 0.971 | 0.889 | 0.847 | 0.903 | 0.853 |
| 759 | 0.971 | 0.889 | 0.847 | 0.903 | 0.853 |
| 760 | 0.971 | 0.889 | 0.847 | 0.903 | 0.853 |
| 761 | 0.971 | 0.889 | 0.847 | 0.903 | 0.853 |
| 762 | 0.971 | 0.889 | 0.847 | 0.903 | 0.853 |
| 763 | 0.971 | 0.889 | 0.844 | 0.902 | 0.852 |
| 764 | 0.971 | 0.889 | 0.844 | 0.902 | 0.852 |
| 765 | 0.971 | 0.889 | 0.844 | 0.902 | 0.852 |
| 766 | 0.971 | 0.889 | 0.844 | 0.902 | 0.852 |
| 767 | 0.971 | 0.889 | 0.844 | 0.902 | 0.852 |
| 768 | 0.971 | 0.889 | 0.844 | 0.902 | 0.852 |
| 769 | 0.971 | 0.889 | 0.844 | 0.902 | 0.852 |
| 770 | 0.971 | 0.889 | 0.844 | 0.902 | 0.852 |
| 771 | 0.971 | 0.889 | 0.847 | 0.903 | 0.853 |
| 772 | 0.971 | 0.891 | 0.844 | 0.903 | 0.854 |
| 773 | 0.971 | 0.891 | 0.844 | 0.903 | 0.854 |
| 774 | 0.971 | 0.891 | 0.844 | 0.903 | 0.854 |
| 775 | 0.971 | 0.891 | 0.844 | 0.903 | 0.854 |
| 776 | 0.971 | 0.891 | 0.844 | 0.903 | 0.854 |
| 777 | 0.971 | 0.891 | 0.844 | 0.903 | 0.854 |
| 778 | 0.971 | 0.891 | 0.844 | 0.903 | 0.854 |
| 779 | 0.971 | 0.891 | 0.844 | 0.903 | 0.854 |
| 780 | 0.971 | 0.891 | 0.844 | 0.903 | 0.854 |
| 781 | 0.971 | 0.891 | 0.844 | 0.903 | 0.854 |
| 782 | 0.971 | 0.891 | 0.844 | 0.903 | 0.854 |
| 783 | 0.971 | 0.891 | 0.844 | 0.903 | 0.854 |
| 784 | 0.971 | 0.891 | 0.844 | 0.903 | 0.854 |
| 785 | 0.971 | 0.891 | 0.844 | 0.903 | 0.854 |
| 786 | 0.971 | 0.891 | 0.844 | 0.903 | 0.854 |

| 787                        | 0.971     | 0.889       | 0.844    | 0.902      | 0.852      |
|----------------------------|-----------|-------------|----------|------------|------------|
| 788                        | 0.974     | 0.889       | 0.847    | 0.903      | 0.855      |
| <b>SHAP by lightGBM</b>    |           |             |          |            |            |
| <b>Numbers of features</b> | <b>G1</b> | <b>G2/M</b> | <b>S</b> | <b>ACC</b> | <b>MCC</b> |
| 1                          | 0.942     | 0.682       | 0.689    | 0.769      | 0.654      |
| 2                          | 0.971     | 0.612       | 0.847    | 0.802      | 0.716      |
| 3                          | 0.971     | 0.628       | 0.838    | 0.805      | 0.718      |
| 4                          | 0.971     | 0.778       | 0.829    | 0.857      | 0.787      |
| 5                          | 0.965     | 0.780       | 0.829    | 0.856      | 0.785      |
| 6                          | 0.974     | 0.814       | 0.802    | 0.862      | 0.794      |
| 7                          | 0.960     | 0.832       | 0.799    | 0.863      | 0.795      |
| 8                          | 0.962     | 0.873       | 0.775    | 0.872      | 0.807      |
| 9                          | 0.962     | 0.876       | 0.778    | 0.873      | 0.810      |
| 10                         | 0.968     | 0.886       | 0.802    | 0.887      | 0.830      |
| 11                         | 0.968     | 0.868       | 0.805    | 0.881      | 0.821      |
| 12                         | 0.962     | 0.829       | 0.772    | 0.855      | 0.782      |
| 13                         | 0.960     | 0.837       | 0.766    | 0.855      | 0.782      |
| 14                         | 0.960     | 0.837       | 0.790    | 0.862      | 0.793      |
| 15                         | 0.960     | 0.850       | 0.784    | 0.865      | 0.797      |
| 16                         | 0.960     | 0.855       | 0.787    | 0.868      | 0.801      |
| 17                         | 0.968     | 0.889       | 0.781    | 0.881      | 0.821      |
| 18                         | 0.968     | 0.889       | 0.790    | 0.884      | 0.825      |
| 19                         | 0.974     | 0.879       | 0.784    | 0.880      | 0.820      |
| 20                         | 0.968     | 0.884       | 0.784    | 0.880      | 0.820      |
| 21                         | 0.974     | 0.884       | 0.796    | 0.886      | 0.828      |
| 22                         | 0.971     | 0.881       | 0.823    | 0.892      | 0.838      |
| 23                         | 0.971     | 0.881       | 0.826    | 0.893      | 0.839      |
| 24                         | 0.957     | 0.855       | 0.823    | 0.878      | 0.817      |
| 25                         | 0.974     | 0.868       | 0.835    | 0.892      | 0.838      |
| 26                         | 0.971     | 0.863       | 0.838    | 0.890      | 0.835      |
| 27                         | 0.968     | 0.863       | 0.835    | 0.888      | 0.832      |
| 28                         | 0.971     | 0.876       | 0.829    | 0.892      | 0.838      |
| 29                         | 0.968     | 0.868       | 0.811    | 0.883      | 0.824      |
| 30                         | 0.968     | 0.863       | 0.817    | 0.883      | 0.824      |
| 31                         | 0.974     | 0.866       | 0.832    | 0.890      | 0.835      |
| 32                         | 0.977     | 0.871       | 0.826    | 0.891      | 0.837      |
| 33                         | 0.974     | 0.873       | 0.829    | 0.892      | 0.838      |
| 34                         | 0.962     | 0.871       | 0.811    | 0.882      | 0.823      |
| 35                         | 0.960     | 0.871       | 0.826    | 0.886      | 0.828      |
| 36                         | 0.962     | 0.879       | 0.823    | 0.888      | 0.832      |
| 37                         | 0.968     | 0.871       | 0.835    | 0.891      | 0.837      |
| 38                         | 0.974     | 0.853       | 0.826    | 0.884      | 0.826      |



|    |       |       |       |       |       |
|----|-------|-------|-------|-------|-------|
| 39 | 0.971 | 0.863 | 0.832 | 0.888 | 0.833 |
| 40 | 0.974 | 0.866 | 0.826 | 0.888 | 0.832 |
| 41 | 0.974 | 0.860 | 0.823 | 0.886 | 0.828 |
| 42 | 0.971 | 0.860 | 0.835 | 0.888 | 0.833 |
| 43 | 0.974 | 0.860 | 0.826 | 0.887 | 0.830 |
| 44 | 0.974 | 0.858 | 0.847 | 0.892 | 0.838 |
| 45 | 0.974 | 0.858 | 0.850 | 0.893 | 0.840 |
| 46 | 0.974 | 0.863 | 0.850 | 0.895 | 0.843 |
| 47 | 0.965 | 0.860 | 0.823 | 0.883 | 0.824 |
| 48 | 0.968 | 0.858 | 0.832 | 0.886 | 0.828 |
| 49 | 0.965 | 0.860 | 0.841 | 0.888 | 0.833 |
| 50 | 0.968 | 0.855 | 0.829 | 0.884 | 0.826 |
| 51 | 0.968 | 0.850 | 0.832 | 0.883 | 0.824 |
| 52 | 0.968 | 0.855 | 0.829 | 0.884 | 0.826 |
| 53 | 0.974 | 0.850 | 0.835 | 0.886 | 0.828 |
| 54 | 0.974 | 0.850 | 0.835 | 0.886 | 0.828 |
| 55 | 0.965 | 0.860 | 0.841 | 0.888 | 0.833 |
| 56 | 0.971 | 0.866 | 0.838 | 0.891 | 0.837 |
| 57 | 0.968 | 0.855 | 0.844 | 0.888 | 0.833 |
| 58 | 0.968 | 0.863 | 0.841 | 0.890 | 0.835 |
| 59 | 0.977 | 0.853 | 0.829 | 0.886 | 0.828 |
| 60 | 0.977 | 0.855 | 0.832 | 0.888 | 0.831 |
| 61 | 0.977 | 0.866 | 0.820 | 0.888 | 0.831 |
| 62 | 0.977 | 0.868 | 0.820 | 0.888 | 0.833 |
| 63 | 0.965 | 0.863 | 0.841 | 0.889 | 0.834 |
| 64 | 0.965 | 0.863 | 0.841 | 0.889 | 0.834 |
| 65 | 0.965 | 0.868 | 0.841 | 0.891 | 0.837 |
| 66 | 0.965 | 0.871 | 0.838 | 0.891 | 0.837 |
| 67 | 0.965 | 0.873 | 0.841 | 0.893 | 0.839 |
| 68 | 0.962 | 0.871 | 0.847 | 0.893 | 0.840 |
| 69 | 0.962 | 0.871 | 0.847 | 0.893 | 0.840 |
| 70 | 0.980 | 0.871 | 0.847 | 0.899 | 0.848 |
| 71 | 0.974 | 0.868 | 0.835 | 0.892 | 0.838 |
| 72 | 0.980 | 0.866 | 0.838 | 0.894 | 0.841 |
| 73 | 0.977 | 0.868 | 0.832 | 0.892 | 0.838 |
| 74 | 0.977 | 0.871 | 0.838 | 0.895 | 0.842 |
| 75 | 0.977 | 0.871 | 0.856 | 0.901 | 0.851 |
| 76 | 0.977 | 0.868 | 0.850 | 0.898 | 0.847 |
| 77 | 0.980 | 0.868 | 0.856 | 0.901 | 0.851 |
| 78 | 0.977 | 0.868 | 0.865 | 0.903 | 0.854 |
| 79 | 0.977 | 0.873 | 0.859 | 0.903 | 0.854 |
| 80 | 0.977 | 0.876 | 0.853 | 0.902 | 0.852 |

|     |       |       |       |       |       |
|-----|-------|-------|-------|-------|-------|
| 81  | 0.977 | 0.868 | 0.859 | 0.901 | 0.851 |
| 82  | 0.971 | 0.863 | 0.856 | 0.896 | 0.844 |
| 83  | 0.974 | 0.866 | 0.859 | 0.899 | 0.848 |
| 84  | 0.974 | 0.866 | 0.859 | 0.899 | 0.848 |
| 85  | 0.971 | 0.866 | 0.859 | 0.898 | 0.847 |
| 86  | 0.974 | 0.871 | 0.865 | 0.903 | 0.854 |
| 87  | 0.974 | 0.876 | 0.865 | 0.904 | 0.857 |
| 88  | 0.968 | 0.858 | 0.832 | 0.886 | 0.828 |
| 89  | 0.968 | 0.858 | 0.832 | 0.886 | 0.828 |
| 90  | 0.968 | 0.860 | 0.826 | 0.885 | 0.827 |
| 91  | 0.968 | 0.860 | 0.826 | 0.885 | 0.827 |
| 92  | 0.968 | 0.866 | 0.823 | 0.886 | 0.828 |
| 93  | 0.968 | 0.863 | 0.823 | 0.885 | 0.827 |
| 94  | 0.971 | 0.863 | 0.820 | 0.885 | 0.827 |
| 95  | 0.971 | 0.863 | 0.826 | 0.887 | 0.830 |
| 96  | 0.971 | 0.860 | 0.823 | 0.885 | 0.827 |
| 97  | 0.971 | 0.863 | 0.829 | 0.888 | 0.831 |
| 98  | 0.971 | 0.866 | 0.829 | 0.888 | 0.832 |
| 99  | 0.971 | 0.866 | 0.829 | 0.888 | 0.832 |
| 100 | 0.971 | 0.858 | 0.829 | 0.886 | 0.828 |
| 101 | 0.971 | 0.855 | 0.841 | 0.888 | 0.833 |
| 102 | 0.974 | 0.853 | 0.838 | 0.888 | 0.831 |
| 103 | 0.971 | 0.858 | 0.844 | 0.890 | 0.835 |
| 104 | 0.974 | 0.860 | 0.844 | 0.892 | 0.838 |
| 105 | 0.974 | 0.855 | 0.835 | 0.888 | 0.831 |
| 106 | 0.974 | 0.850 | 0.850 | 0.890 | 0.836 |
| 107 | 0.974 | 0.850 | 0.850 | 0.890 | 0.836 |
| 108 | 0.974 | 0.848 | 0.847 | 0.888 | 0.833 |
| 109 | 0.974 | 0.848 | 0.847 | 0.888 | 0.833 |
| 110 | 0.977 | 0.858 | 0.844 | 0.892 | 0.838 |
| 111 | 0.977 | 0.863 | 0.856 | 0.898 | 0.847 |
| 112 | 0.977 | 0.855 | 0.856 | 0.895 | 0.843 |
| 113 | 0.974 | 0.858 | 0.856 | 0.895 | 0.843 |
| 114 | 0.974 | 0.858 | 0.853 | 0.894 | 0.841 |
| 115 | 0.974 | 0.860 | 0.856 | 0.896 | 0.844 |
| 116 | 0.977 | 0.871 | 0.859 | 0.902 | 0.852 |
| 117 | 0.977 | 0.871 | 0.859 | 0.902 | 0.852 |
| 118 | 0.974 | 0.876 | 0.853 | 0.901 | 0.851 |
| 119 | 0.971 | 0.884 | 0.850 | 0.902 | 0.852 |
| 120 | 0.971 | 0.884 | 0.853 | 0.903 | 0.854 |
| 121 | 0.971 | 0.879 | 0.853 | 0.901 | 0.851 |
| 122 | 0.971 | 0.879 | 0.853 | 0.901 | 0.851 |

|     |       |       |       |       |       |
|-----|-------|-------|-------|-------|-------|
| 123 | 0.971 | 0.876 | 0.859 | 0.902 | 0.852 |
| 124 | 0.968 | 0.868 | 0.868 | 0.901 | 0.851 |
| 125 | 0.968 | 0.866 | 0.868 | 0.900 | 0.850 |
| 126 | 0.968 | 0.868 | 0.868 | 0.901 | 0.851 |
| 127 | 0.968 | 0.866 | 0.862 | 0.898 | 0.847 |
| 128 | 0.968 | 0.873 | 0.862 | 0.901 | 0.851 |
| 129 | 0.968 | 0.879 | 0.850 | 0.899 | 0.848 |
| 130 | 0.968 | 0.876 | 0.856 | 0.900 | 0.849 |
| 131 | 0.968 | 0.873 | 0.859 | 0.900 | 0.849 |
| 132 | 0.968 | 0.873 | 0.859 | 0.900 | 0.849 |
| 133 | 0.971 | 0.886 | 0.859 | 0.905 | 0.858 |
| 134 | 0.968 | 0.879 | 0.862 | 0.903 | 0.854 |
| 135 | 0.974 | 0.879 | 0.859 | 0.903 | 0.855 |
| 136 | 0.974 | 0.881 | 0.862 | 0.905 | 0.858 |
| 137 | 0.974 | 0.881 | 0.859 | 0.904 | 0.856 |
| 138 | 0.974 | 0.884 | 0.856 | 0.904 | 0.856 |
| 139 | 0.974 | 0.884 | 0.862 | 0.906 | 0.859 |
| 140 | 0.974 | 0.889 | 0.862 | 0.908 | 0.862 |
| 141 | 0.974 | 0.886 | 0.862 | 0.907 | 0.861 |
| 142 | 0.974 | 0.889 | 0.862 | 0.908 | 0.862 |
| 143 | 0.971 | 0.891 | 0.862 | 0.908 | 0.862 |
| 144 | 0.971 | 0.894 | 0.865 | 0.910 | 0.865 |
| 145 | 0.971 | 0.884 | 0.859 | 0.904 | 0.856 |
| 146 | 0.971 | 0.881 | 0.856 | 0.903 | 0.854 |
| 147 | 0.971 | 0.881 | 0.856 | 0.903 | 0.854 |
| 148 | 0.971 | 0.881 | 0.856 | 0.903 | 0.854 |
| 149 | 0.968 | 0.881 | 0.862 | 0.903 | 0.855 |
| 150 | 0.968 | 0.881 | 0.862 | 0.903 | 0.855 |
| 151 | 0.974 | 0.884 | 0.868 | 0.908 | 0.862 |
| 152 | 0.974 | 0.886 | 0.868 | 0.909 | 0.863 |
| 153 | 0.974 | 0.884 | 0.868 | 0.908 | 0.862 |
| 154 | 0.971 | 0.884 | 0.868 | 0.907 | 0.861 |
| 155 | 0.965 | 0.886 | 0.868 | 0.906 | 0.859 |
| 156 | 0.968 | 0.884 | 0.868 | 0.906 | 0.859 |
| 157 | 0.965 | 0.884 | 0.868 | 0.905 | 0.858 |
| 158 | 0.971 | 0.881 | 0.877 | 0.909 | 0.864 |
| 159 | 0.968 | 0.879 | 0.877 | 0.907 | 0.861 |
| 160 | 0.965 | 0.881 | 0.877 | 0.907 | 0.861 |
| 161 | 0.965 | 0.886 | 0.874 | 0.908 | 0.862 |
| 162 | 0.965 | 0.884 | 0.871 | 0.906 | 0.859 |
| 163 | 0.962 | 0.891 | 0.874 | 0.909 | 0.863 |
| 164 | 0.962 | 0.891 | 0.874 | 0.909 | 0.863 |

|     |       |       |       |       |       |
|-----|-------|-------|-------|-------|-------|
| 165 | 0.962 | 0.886 | 0.874 | 0.907 | 0.861 |
| 166 | 0.962 | 0.884 | 0.874 | 0.906 | 0.859 |
| 167 | 0.965 | 0.886 | 0.859 | 0.903 | 0.855 |
| 168 | 0.965 | 0.886 | 0.859 | 0.903 | 0.855 |
| 169 | 0.965 | 0.886 | 0.859 | 0.903 | 0.855 |
| 170 | 0.965 | 0.886 | 0.859 | 0.903 | 0.855 |
| 171 | 0.968 | 0.897 | 0.868 | 0.911 | 0.866 |
| 172 | 0.968 | 0.899 | 0.865 | 0.911 | 0.866 |
| 173 | 0.968 | 0.904 | 0.862 | 0.912 | 0.868 |
| 174 | 0.968 | 0.904 | 0.859 | 0.911 | 0.866 |
| 175 | 0.968 | 0.902 | 0.868 | 0.913 | 0.869 |
| 176 | 0.968 | 0.902 | 0.868 | 0.913 | 0.869 |
| 177 | 0.968 | 0.902 | 0.868 | 0.913 | 0.869 |
| 178 | 0.968 | 0.897 | 0.859 | 0.908 | 0.862 |
| 179 | 0.968 | 0.894 | 0.853 | 0.905 | 0.858 |
| 180 | 0.965 | 0.897 | 0.853 | 0.905 | 0.858 |
| 181 | 0.962 | 0.899 | 0.859 | 0.907 | 0.861 |
| 182 | 0.962 | 0.899 | 0.865 | 0.909 | 0.863 |
| 183 | 0.962 | 0.899 | 0.865 | 0.909 | 0.863 |
| 184 | 0.962 | 0.899 | 0.859 | 0.907 | 0.861 |
| 185 | 0.962 | 0.902 | 0.868 | 0.911 | 0.866 |
| 186 | 0.962 | 0.902 | 0.865 | 0.910 | 0.865 |
| 187 | 0.962 | 0.902 | 0.865 | 0.910 | 0.865 |
| 188 | 0.962 | 0.899 | 0.862 | 0.908 | 0.862 |
| 189 | 0.962 | 0.899 | 0.862 | 0.908 | 0.862 |
| 190 | 0.965 | 0.894 | 0.862 | 0.907 | 0.861 |
| 191 | 0.962 | 0.894 | 0.862 | 0.906 | 0.859 |
| 192 | 0.962 | 0.894 | 0.862 | 0.906 | 0.859 |
| 193 | 0.965 | 0.894 | 0.859 | 0.906 | 0.859 |
| 194 | 0.965 | 0.894 | 0.859 | 0.906 | 0.859 |
| 195 | 0.965 | 0.894 | 0.862 | 0.907 | 0.861 |
| 196 | 0.962 | 0.894 | 0.868 | 0.908 | 0.862 |
| 197 | 0.962 | 0.894 | 0.868 | 0.908 | 0.862 |
| 198 | 0.968 | 0.884 | 0.871 | 0.907 | 0.861 |
| 199 | 0.968 | 0.881 | 0.871 | 0.906 | 0.859 |
| 200 | 0.971 | 0.879 | 0.865 | 0.904 | 0.857 |
| 201 | 0.971 | 0.879 | 0.865 | 0.904 | 0.857 |
| 202 | 0.968 | 0.884 | 0.859 | 0.903 | 0.855 |
| 203 | 0.974 | 0.873 | 0.865 | 0.903 | 0.855 |
| 204 | 0.974 | 0.873 | 0.865 | 0.903 | 0.855 |
| 205 | 0.974 | 0.873 | 0.865 | 0.903 | 0.855 |
| 206 | 0.974 | 0.876 | 0.868 | 0.905 | 0.858 |

|     |       |       |       |       |       |
|-----|-------|-------|-------|-------|-------|
| 207 | 0.974 | 0.876 | 0.868 | 0.905 | 0.858 |
| 208 | 0.974 | 0.876 | 0.868 | 0.905 | 0.858 |
| 209 | 0.974 | 0.876 | 0.868 | 0.905 | 0.858 |
| 210 | 0.974 | 0.873 | 0.877 | 0.907 | 0.861 |
| 211 | 0.974 | 0.876 | 0.877 | 0.908 | 0.862 |
| 212 | 0.974 | 0.876 | 0.877 | 0.908 | 0.862 |
| 213 | 0.974 | 0.873 | 0.874 | 0.906 | 0.859 |
| 214 | 0.974 | 0.873 | 0.874 | 0.906 | 0.859 |
| 215 | 0.974 | 0.871 | 0.871 | 0.904 | 0.857 |
| 216 | 0.974 | 0.873 | 0.871 | 0.905 | 0.858 |
| 217 | 0.974 | 0.873 | 0.874 | 0.906 | 0.859 |
| 218 | 0.974 | 0.879 | 0.877 | 0.909 | 0.864 |
| 219 | 0.974 | 0.881 | 0.877 | 0.910 | 0.865 |
| 220 | 0.980 | 0.884 | 0.883 | 0.915 | 0.872 |
| 221 | 0.980 | 0.884 | 0.880 | 0.914 | 0.871 |
| 222 | 0.980 | 0.886 | 0.886 | 0.917 | 0.875 |
| 223 | 0.980 | 0.886 | 0.886 | 0.917 | 0.875 |
| 224 | 0.980 | 0.886 | 0.886 | 0.917 | 0.875 |
| 225 | 0.977 | 0.881 | 0.871 | 0.909 | 0.864 |
| 226 | 0.977 | 0.881 | 0.865 | 0.907 | 0.861 |
| 227 | 0.977 | 0.881 | 0.865 | 0.907 | 0.861 |
| 228 | 0.977 | 0.881 | 0.868 | 0.908 | 0.862 |
| 229 | 0.977 | 0.881 | 0.868 | 0.908 | 0.862 |
| 230 | 0.977 | 0.881 | 0.868 | 0.908 | 0.862 |
| 231 | 0.977 | 0.884 | 0.868 | 0.909 | 0.863 |
| 232 | 0.977 | 0.879 | 0.868 | 0.907 | 0.861 |
| 233 | 0.977 | 0.879 | 0.868 | 0.907 | 0.861 |
| 234 | 0.965 | 0.871 | 0.865 | 0.900 | 0.849 |
| 235 | 0.965 | 0.879 | 0.865 | 0.903 | 0.854 |
| 236 | 0.962 | 0.879 | 0.865 | 0.902 | 0.852 |
| 237 | 0.965 | 0.876 | 0.868 | 0.903 | 0.854 |
| 238 | 0.965 | 0.876 | 0.868 | 0.903 | 0.854 |
| 239 | 0.965 | 0.876 | 0.868 | 0.903 | 0.854 |
| 240 | 0.968 | 0.879 | 0.862 | 0.903 | 0.854 |
| 241 | 0.968 | 0.884 | 0.862 | 0.904 | 0.856 |
| 242 | 0.968 | 0.881 | 0.862 | 0.903 | 0.855 |
| 243 | 0.968 | 0.881 | 0.862 | 0.903 | 0.855 |
| 244 | 0.968 | 0.881 | 0.862 | 0.903 | 0.855 |
| 245 | 0.968 | 0.881 | 0.862 | 0.903 | 0.855 |
| 246 | 0.968 | 0.881 | 0.862 | 0.903 | 0.855 |
| 247 | 0.968 | 0.881 | 0.862 | 0.903 | 0.855 |
| 248 | 0.968 | 0.876 | 0.865 | 0.903 | 0.854 |

|     |       |       |       |       |       |
|-----|-------|-------|-------|-------|-------|
| 249 | 0.968 | 0.876 | 0.865 | 0.903 | 0.854 |
| 250 | 0.968 | 0.876 | 0.868 | 0.903 | 0.855 |
| 251 | 0.968 | 0.876 | 0.868 | 0.903 | 0.855 |
| 252 | 0.968 | 0.876 | 0.868 | 0.903 | 0.855 |
| 253 | 0.968 | 0.873 | 0.868 | 0.903 | 0.854 |
| 254 | 0.968 | 0.873 | 0.865 | 0.902 | 0.852 |
| 255 | 0.968 | 0.876 | 0.868 | 0.903 | 0.855 |
| 256 | 0.968 | 0.873 | 0.868 | 0.903 | 0.854 |
| 257 | 0.968 | 0.873 | 0.868 | 0.903 | 0.854 |
| 258 | 0.971 | 0.876 | 0.865 | 0.903 | 0.855 |
| 259 | 0.974 | 0.879 | 0.862 | 0.904 | 0.856 |
| 260 | 0.971 | 0.871 | 0.862 | 0.901 | 0.851 |
| 261 | 0.971 | 0.871 | 0.862 | 0.901 | 0.851 |
| 262 | 0.971 | 0.871 | 0.862 | 0.901 | 0.851 |
| 263 | 0.971 | 0.868 | 0.862 | 0.900 | 0.849 |
| 264 | 0.971 | 0.866 | 0.862 | 0.899 | 0.848 |
| 265 | 0.971 | 0.868 | 0.862 | 0.900 | 0.849 |
| 266 | 0.971 | 0.868 | 0.862 | 0.900 | 0.849 |
| 267 | 0.971 | 0.868 | 0.862 | 0.900 | 0.849 |
| 268 | 0.971 | 0.866 | 0.862 | 0.899 | 0.848 |
| 269 | 0.971 | 0.866 | 0.862 | 0.899 | 0.848 |
| 270 | 0.968 | 0.871 | 0.862 | 0.900 | 0.849 |
| 271 | 0.968 | 0.871 | 0.856 | 0.898 | 0.847 |
| 272 | 0.968 | 0.876 | 0.856 | 0.900 | 0.849 |
| 273 | 0.968 | 0.876 | 0.853 | 0.899 | 0.848 |
| 274 | 0.965 | 0.876 | 0.877 | 0.905 | 0.858 |
| 275 | 0.965 | 0.873 | 0.877 | 0.904 | 0.857 |
| 276 | 0.965 | 0.873 | 0.877 | 0.904 | 0.857 |
| 277 | 0.971 | 0.881 | 0.877 | 0.909 | 0.864 |
| 278 | 0.971 | 0.879 | 0.877 | 0.908 | 0.862 |
| 279 | 0.971 | 0.879 | 0.877 | 0.908 | 0.862 |
| 280 | 0.971 | 0.879 | 0.877 | 0.908 | 0.862 |
| 281 | 0.971 | 0.879 | 0.877 | 0.908 | 0.862 |
| 282 | 0.971 | 0.876 | 0.877 | 0.907 | 0.861 |
| 283 | 0.971 | 0.879 | 0.877 | 0.908 | 0.862 |
| 284 | 0.971 | 0.879 | 0.877 | 0.908 | 0.862 |
| 285 | 0.971 | 0.879 | 0.877 | 0.908 | 0.862 |
| 286 | 0.971 | 0.879 | 0.877 | 0.908 | 0.862 |
| 287 | 0.971 | 0.876 | 0.877 | 0.907 | 0.861 |
| 288 | 0.971 | 0.881 | 0.880 | 0.910 | 0.865 |
| 289 | 0.971 | 0.881 | 0.880 | 0.910 | 0.865 |
| 290 | 0.983 | 0.879 | 0.877 | 0.912 | 0.868 |

|     |       |       |       |       |       |
|-----|-------|-------|-------|-------|-------|
| 291 | 0.983 | 0.879 | 0.877 | 0.912 | 0.868 |
| 292 | 0.980 | 0.876 | 0.874 | 0.909 | 0.864 |
| 293 | 0.980 | 0.879 | 0.877 | 0.911 | 0.866 |
| 294 | 0.980 | 0.879 | 0.877 | 0.911 | 0.866 |
| 295 | 0.980 | 0.879 | 0.877 | 0.911 | 0.866 |
| 296 | 0.980 | 0.873 | 0.871 | 0.907 | 0.861 |
| 297 | 0.977 | 0.876 | 0.871 | 0.907 | 0.861 |
| 298 | 0.977 | 0.873 | 0.871 | 0.906 | 0.859 |
| 299 | 0.977 | 0.873 | 0.871 | 0.906 | 0.859 |
| 300 | 0.977 | 0.873 | 0.871 | 0.906 | 0.859 |
| 301 | 0.977 | 0.873 | 0.871 | 0.906 | 0.859 |
| 302 | 0.974 | 0.873 | 0.871 | 0.905 | 0.858 |
| 303 | 0.974 | 0.876 | 0.871 | 0.906 | 0.859 |
| 304 | 0.974 | 0.876 | 0.871 | 0.906 | 0.859 |
| 305 | 0.974 | 0.876 | 0.874 | 0.907 | 0.861 |
| 306 | 0.974 | 0.876 | 0.874 | 0.907 | 0.861 |
| 307 | 0.971 | 0.879 | 0.874 | 0.907 | 0.861 |
| 308 | 0.971 | 0.879 | 0.874 | 0.907 | 0.861 |
| 309 | 0.971 | 0.876 | 0.874 | 0.906 | 0.859 |
| 310 | 0.971 | 0.879 | 0.874 | 0.907 | 0.861 |
| 311 | 0.971 | 0.879 | 0.874 | 0.907 | 0.861 |
| 312 | 0.971 | 0.879 | 0.874 | 0.907 | 0.861 |
| 313 | 0.971 | 0.879 | 0.859 | 0.903 | 0.854 |
| 314 | 0.971 | 0.879 | 0.859 | 0.903 | 0.854 |
| 315 | 0.971 | 0.879 | 0.859 | 0.903 | 0.854 |
| 316 | 0.971 | 0.881 | 0.859 | 0.903 | 0.855 |
| 317 | 0.971 | 0.879 | 0.856 | 0.902 | 0.852 |
| 318 | 0.971 | 0.884 | 0.865 | 0.906 | 0.859 |
| 319 | 0.971 | 0.884 | 0.862 | 0.905 | 0.858 |
| 320 | 0.971 | 0.884 | 0.862 | 0.905 | 0.858 |
| 321 | 0.971 | 0.886 | 0.862 | 0.906 | 0.859 |
| 322 | 0.974 | 0.881 | 0.865 | 0.906 | 0.859 |
| 323 | 0.974 | 0.884 | 0.865 | 0.907 | 0.861 |
| 324 | 0.986 | 0.884 | 0.865 | 0.911 | 0.866 |
| 325 | 0.986 | 0.884 | 0.865 | 0.911 | 0.866 |
| 326 | 0.986 | 0.884 | 0.862 | 0.910 | 0.865 |
| 327 | 0.986 | 0.889 | 0.862 | 0.912 | 0.868 |
| 328 | 0.986 | 0.889 | 0.862 | 0.912 | 0.868 |
| 329 | 0.986 | 0.889 | 0.862 | 0.912 | 0.868 |
| 330 | 0.986 | 0.886 | 0.862 | 0.911 | 0.866 |
| 331 | 0.986 | 0.886 | 0.862 | 0.911 | 0.866 |
| 332 | 0.983 | 0.889 | 0.862 | 0.911 | 0.866 |

|     |       |       |       |       |       |
|-----|-------|-------|-------|-------|-------|
| 333 | 0.983 | 0.889 | 0.862 | 0.911 | 0.866 |
| 334 | 0.983 | 0.889 | 0.862 | 0.911 | 0.866 |
| 335 | 0.983 | 0.886 | 0.856 | 0.908 | 0.862 |
| 336 | 0.983 | 0.884 | 0.856 | 0.907 | 0.861 |
| 337 | 0.983 | 0.886 | 0.859 | 0.909 | 0.863 |
| 338 | 0.983 | 0.884 | 0.859 | 0.908 | 0.862 |
| 339 | 0.983 | 0.884 | 0.859 | 0.908 | 0.862 |
| 340 | 0.983 | 0.876 | 0.859 | 0.905 | 0.858 |
| 341 | 0.983 | 0.873 | 0.856 | 0.903 | 0.855 |
| 342 | 0.983 | 0.879 | 0.856 | 0.905 | 0.858 |
| 343 | 0.983 | 0.881 | 0.862 | 0.908 | 0.862 |
| 344 | 0.983 | 0.876 | 0.862 | 0.906 | 0.859 |
| 345 | 0.986 | 0.873 | 0.859 | 0.905 | 0.858 |
| 346 | 0.986 | 0.871 | 0.859 | 0.904 | 0.857 |
| 347 | 0.986 | 0.881 | 0.859 | 0.908 | 0.862 |
| 348 | 0.986 | 0.881 | 0.868 | 0.911 | 0.866 |
| 349 | 0.986 | 0.881 | 0.868 | 0.911 | 0.866 |
| 350 | 0.986 | 0.884 | 0.868 | 0.912 | 0.868 |
| 351 | 0.986 | 0.884 | 0.868 | 0.912 | 0.868 |
| 352 | 0.986 | 0.884 | 0.868 | 0.912 | 0.868 |
| 353 | 0.986 | 0.881 | 0.868 | 0.911 | 0.866 |
| 354 | 0.986 | 0.879 | 0.865 | 0.909 | 0.864 |
| 355 | 0.986 | 0.881 | 0.865 | 0.910 | 0.865 |
| 356 | 0.986 | 0.881 | 0.865 | 0.910 | 0.865 |
| 357 | 0.986 | 0.884 | 0.865 | 0.911 | 0.866 |
| 358 | 0.986 | 0.879 | 0.859 | 0.907 | 0.861 |
| 359 | 0.986 | 0.876 | 0.859 | 0.906 | 0.859 |
| 360 | 0.986 | 0.876 | 0.859 | 0.906 | 0.859 |
| 361 | 0.986 | 0.876 | 0.862 | 0.907 | 0.861 |
| 362 | 0.986 | 0.876 | 0.862 | 0.907 | 0.861 |
| 363 | 0.986 | 0.873 | 0.865 | 0.907 | 0.861 |
| 364 | 0.986 | 0.873 | 0.862 | 0.906 | 0.859 |
| 365 | 0.986 | 0.871 | 0.862 | 0.905 | 0.858 |
| 366 | 0.986 | 0.871 | 0.862 | 0.905 | 0.858 |
| 367 | 0.986 | 0.871 | 0.862 | 0.905 | 0.858 |
| 368 | 0.986 | 0.868 | 0.862 | 0.904 | 0.857 |
| 369 | 0.986 | 0.871 | 0.862 | 0.905 | 0.858 |
| 370 | 0.986 | 0.876 | 0.868 | 0.909 | 0.864 |
| 371 | 0.986 | 0.876 | 0.868 | 0.909 | 0.864 |
| 372 | 0.986 | 0.873 | 0.868 | 0.908 | 0.862 |
| 373 | 0.986 | 0.873 | 0.868 | 0.908 | 0.862 |
| 374 | 0.986 | 0.873 | 0.868 | 0.908 | 0.862 |



|     |       |       |       |       |       |
|-----|-------|-------|-------|-------|-------|
| 375 | 0.986 | 0.873 | 0.868 | 0.908 | 0.862 |
| 376 | 0.986 | 0.873 | 0.868 | 0.908 | 0.862 |
| 377 | 0.986 | 0.873 | 0.868 | 0.908 | 0.862 |
| 378 | 0.986 | 0.873 | 0.868 | 0.908 | 0.862 |
| 379 | 0.986 | 0.873 | 0.868 | 0.908 | 0.862 |
| 380 | 0.986 | 0.871 | 0.874 | 0.909 | 0.864 |
| 381 | 0.986 | 0.871 | 0.874 | 0.909 | 0.864 |
| 382 | 0.986 | 0.871 | 0.874 | 0.909 | 0.864 |
| 383 | 0.986 | 0.871 | 0.874 | 0.909 | 0.864 |
| 384 | 0.986 | 0.871 | 0.874 | 0.909 | 0.864 |
| 385 | 0.986 | 0.871 | 0.871 | 0.908 | 0.862 |
| 386 | 0.986 | 0.871 | 0.871 | 0.908 | 0.862 |
| 387 | 0.986 | 0.871 | 0.871 | 0.908 | 0.862 |
| 388 | 0.986 | 0.873 | 0.871 | 0.909 | 0.864 |
| 389 | 0.986 | 0.868 | 0.871 | 0.907 | 0.861 |
| 390 | 0.986 | 0.868 | 0.871 | 0.907 | 0.861 |
| 391 | 0.986 | 0.868 | 0.871 | 0.907 | 0.861 |
| 392 | 0.986 | 0.868 | 0.871 | 0.907 | 0.861 |
| 393 | 0.986 | 0.868 | 0.871 | 0.907 | 0.861 |
| 394 | 0.986 | 0.868 | 0.871 | 0.907 | 0.861 |
| 395 | 0.986 | 0.868 | 0.871 | 0.907 | 0.861 |
| 396 | 0.986 | 0.868 | 0.871 | 0.907 | 0.861 |
| 397 | 0.986 | 0.868 | 0.871 | 0.907 | 0.861 |
| 398 | 0.983 | 0.894 | 0.856 | 0.911 | 0.866 |
| 399 | 0.983 | 0.886 | 0.862 | 0.910 | 0.865 |
| 400 | 0.983 | 0.886 | 0.862 | 0.910 | 0.865 |
| 401 | 0.983 | 0.889 | 0.862 | 0.911 | 0.866 |
| 402 | 0.983 | 0.889 | 0.862 | 0.911 | 0.866 |
| 403 | 0.983 | 0.891 | 0.862 | 0.912 | 0.868 |
| 404 | 0.983 | 0.889 | 0.862 | 0.911 | 0.866 |
| 405 | 0.983 | 0.889 | 0.862 | 0.911 | 0.866 |
| 406 | 0.986 | 0.886 | 0.859 | 0.910 | 0.865 |
| 407 | 0.986 | 0.886 | 0.859 | 0.910 | 0.865 |
| 408 | 0.986 | 0.886 | 0.859 | 0.910 | 0.865 |
| 409 | 0.986 | 0.886 | 0.865 | 0.912 | 0.868 |
| 410 | 0.986 | 0.886 | 0.865 | 0.912 | 0.868 |
| 411 | 0.986 | 0.886 | 0.865 | 0.912 | 0.868 |
| 412 | 0.986 | 0.886 | 0.865 | 0.912 | 0.868 |
| 413 | 0.986 | 0.886 | 0.865 | 0.912 | 0.868 |
| 414 | 0.986 | 0.886 | 0.862 | 0.911 | 0.866 |
| 415 | 0.986 | 0.886 | 0.862 | 0.911 | 0.866 |
| 416 | 0.986 | 0.886 | 0.862 | 0.911 | 0.866 |

|     |       |       |       |       |       |
|-----|-------|-------|-------|-------|-------|
| 417 | 0.986 | 0.886 | 0.868 | 0.913 | 0.869 |
| 418 | 0.986 | 0.886 | 0.868 | 0.913 | 0.869 |
| 419 | 0.986 | 0.886 | 0.865 | 0.912 | 0.868 |
| 420 | 0.986 | 0.891 | 0.868 | 0.915 | 0.872 |
| 421 | 0.986 | 0.891 | 0.865 | 0.914 | 0.871 |
| 422 | 0.986 | 0.889 | 0.865 | 0.913 | 0.869 |
| 423 | 0.986 | 0.889 | 0.865 | 0.913 | 0.869 |
| 424 | 0.986 | 0.889 | 0.865 | 0.913 | 0.869 |
| 425 | 0.986 | 0.889 | 0.865 | 0.913 | 0.869 |
| 426 | 0.986 | 0.886 | 0.865 | 0.912 | 0.868 |
| 427 | 0.986 | 0.884 | 0.865 | 0.911 | 0.866 |
| 428 | 0.986 | 0.881 | 0.862 | 0.909 | 0.864 |
| 429 | 0.986 | 0.881 | 0.862 | 0.909 | 0.864 |
| 430 | 0.986 | 0.873 | 0.862 | 0.906 | 0.859 |
| 431 | 0.986 | 0.873 | 0.862 | 0.906 | 0.859 |
| 432 | 0.986 | 0.873 | 0.862 | 0.906 | 0.859 |
| 433 | 0.986 | 0.873 | 0.862 | 0.906 | 0.859 |
| 434 | 0.986 | 0.873 | 0.862 | 0.906 | 0.859 |
| 435 | 0.986 | 0.873 | 0.862 | 0.906 | 0.859 |
| 436 | 0.986 | 0.873 | 0.862 | 0.906 | 0.859 |
| 437 | 0.986 | 0.873 | 0.862 | 0.906 | 0.859 |
| 438 | 0.986 | 0.873 | 0.862 | 0.906 | 0.859 |
| 439 | 0.986 | 0.873 | 0.862 | 0.906 | 0.859 |
| 440 | 0.986 | 0.873 | 0.862 | 0.906 | 0.859 |
| 441 | 0.986 | 0.873 | 0.859 | 0.905 | 0.858 |
| 442 | 0.986 | 0.873 | 0.859 | 0.905 | 0.858 |
| 443 | 0.986 | 0.873 | 0.859 | 0.905 | 0.858 |
| 444 | 0.986 | 0.876 | 0.859 | 0.906 | 0.859 |
| 445 | 0.983 | 0.881 | 0.859 | 0.907 | 0.861 |
| 446 | 0.983 | 0.881 | 0.856 | 0.906 | 0.859 |
| 447 | 0.986 | 0.884 | 0.853 | 0.907 | 0.861 |
| 448 | 0.986 | 0.884 | 0.850 | 0.906 | 0.859 |
| 449 | 0.986 | 0.884 | 0.850 | 0.906 | 0.859 |
| 450 | 0.986 | 0.884 | 0.850 | 0.906 | 0.859 |
| 451 | 0.986 | 0.884 | 0.850 | 0.906 | 0.859 |
| 452 | 0.986 | 0.884 | 0.853 | 0.907 | 0.861 |
| 453 | 0.986 | 0.884 | 0.853 | 0.907 | 0.861 |
| 454 | 0.986 | 0.884 | 0.853 | 0.907 | 0.861 |
| 455 | 0.986 | 0.884 | 0.853 | 0.907 | 0.861 |
| 456 | 0.986 | 0.884 | 0.853 | 0.907 | 0.861 |
| 457 | 0.986 | 0.879 | 0.859 | 0.907 | 0.861 |
| 458 | 0.986 | 0.879 | 0.859 | 0.907 | 0.861 |

|     |       |       |       |       |       |
|-----|-------|-------|-------|-------|-------|
| 459 | 0.983 | 0.881 | 0.862 | 0.908 | 0.862 |
| 460 | 0.983 | 0.884 | 0.865 | 0.910 | 0.865 |
| 461 | 0.983 | 0.884 | 0.865 | 0.910 | 0.865 |
| 462 | 0.983 | 0.886 | 0.862 | 0.910 | 0.865 |
| 463 | 0.983 | 0.886 | 0.865 | 0.911 | 0.866 |
| 464 | 0.983 | 0.886 | 0.865 | 0.911 | 0.866 |
| 465 | 0.980 | 0.881 | 0.862 | 0.907 | 0.861 |
| 466 | 0.980 | 0.881 | 0.862 | 0.907 | 0.861 |
| 467 | 0.983 | 0.884 | 0.862 | 0.909 | 0.863 |
| 468 | 0.983 | 0.884 | 0.859 | 0.908 | 0.862 |
| 469 | 0.983 | 0.884 | 0.859 | 0.908 | 0.862 |
| 470 | 0.983 | 0.884 | 0.859 | 0.908 | 0.862 |
| 471 | 0.983 | 0.884 | 0.859 | 0.908 | 0.862 |
| 472 | 0.983 | 0.884 | 0.862 | 0.909 | 0.863 |
| 473 | 0.983 | 0.886 | 0.862 | 0.910 | 0.865 |
| 474 | 0.983 | 0.886 | 0.862 | 0.910 | 0.865 |
| 475 | 0.983 | 0.886 | 0.862 | 0.910 | 0.865 |
| 476 | 0.983 | 0.886 | 0.865 | 0.911 | 0.866 |
| 477 | 0.980 | 0.876 | 0.862 | 0.905 | 0.858 |
| 478 | 0.980 | 0.879 | 0.871 | 0.909 | 0.864 |
| 479 | 0.980 | 0.879 | 0.868 | 0.908 | 0.862 |
| 480 | 0.980 | 0.881 | 0.868 | 0.909 | 0.864 |
| 481 | 0.980 | 0.884 | 0.868 | 0.910 | 0.865 |
| 482 | 0.980 | 0.884 | 0.868 | 0.910 | 0.865 |
| 483 | 0.980 | 0.884 | 0.868 | 0.910 | 0.865 |
| 484 | 0.980 | 0.884 | 0.868 | 0.910 | 0.865 |
| 485 | 0.980 | 0.889 | 0.859 | 0.909 | 0.863 |
| 486 | 0.980 | 0.889 | 0.859 | 0.909 | 0.863 |
| 487 | 0.980 | 0.889 | 0.859 | 0.909 | 0.863 |
| 488 | 0.980 | 0.886 | 0.856 | 0.907 | 0.861 |
| 489 | 0.980 | 0.886 | 0.856 | 0.907 | 0.861 |
| 490 | 0.980 | 0.886 | 0.859 | 0.908 | 0.862 |
| 491 | 0.980 | 0.886 | 0.859 | 0.908 | 0.862 |
| 492 | 0.980 | 0.884 | 0.859 | 0.907 | 0.861 |
| 493 | 0.980 | 0.884 | 0.859 | 0.907 | 0.861 |
| 494 | 0.980 | 0.884 | 0.859 | 0.907 | 0.861 |
| 495 | 0.980 | 0.884 | 0.856 | 0.906 | 0.859 |
| 496 | 0.980 | 0.884 | 0.856 | 0.906 | 0.859 |
| 497 | 0.980 | 0.886 | 0.856 | 0.907 | 0.861 |
| 498 | 0.980 | 0.886 | 0.856 | 0.907 | 0.861 |
| 499 | 0.980 | 0.879 | 0.856 | 0.904 | 0.856 |
| 500 | 0.980 | 0.884 | 0.856 | 0.906 | 0.859 |

|     |       |       |       |       |       |
|-----|-------|-------|-------|-------|-------|
| 501 | 0.980 | 0.884 | 0.856 | 0.906 | 0.859 |
| 502 | 0.980 | 0.881 | 0.856 | 0.905 | 0.858 |
| 503 | 0.983 | 0.884 | 0.856 | 0.907 | 0.861 |
| 504 | 0.983 | 0.884 | 0.856 | 0.907 | 0.861 |
| 505 | 0.980 | 0.884 | 0.856 | 0.906 | 0.859 |
| 506 | 0.980 | 0.886 | 0.856 | 0.907 | 0.861 |
| 507 | 0.986 | 0.884 | 0.847 | 0.905 | 0.858 |
| 508 | 0.986 | 0.884 | 0.847 | 0.905 | 0.858 |
| 509 | 0.986 | 0.884 | 0.847 | 0.905 | 0.858 |
| 510 | 0.986 | 0.879 | 0.847 | 0.903 | 0.855 |
| 511 | 0.986 | 0.889 | 0.844 | 0.906 | 0.859 |
| 512 | 0.986 | 0.889 | 0.847 | 0.907 | 0.861 |
| 513 | 0.986 | 0.886 | 0.847 | 0.906 | 0.859 |
| 514 | 0.986 | 0.886 | 0.847 | 0.906 | 0.859 |
| 515 | 0.986 | 0.886 | 0.844 | 0.905 | 0.858 |
| 516 | 0.986 | 0.884 | 0.844 | 0.904 | 0.856 |
| 517 | 0.986 | 0.884 | 0.847 | 0.905 | 0.858 |
| 518 | 0.986 | 0.884 | 0.847 | 0.905 | 0.858 |
| 519 | 0.986 | 0.884 | 0.847 | 0.905 | 0.858 |
| 520 | 0.986 | 0.884 | 0.847 | 0.905 | 0.858 |
| 521 | 0.986 | 0.884 | 0.847 | 0.905 | 0.858 |
| 522 | 0.986 | 0.884 | 0.847 | 0.905 | 0.858 |
| 523 | 0.986 | 0.884 | 0.844 | 0.904 | 0.856 |
| 524 | 0.986 | 0.886 | 0.841 | 0.904 | 0.856 |
| 525 | 0.986 | 0.886 | 0.844 | 0.905 | 0.858 |
| 526 | 0.986 | 0.886 | 0.847 | 0.906 | 0.859 |
| 527 | 0.986 | 0.886 | 0.844 | 0.905 | 0.858 |
| 528 | 0.986 | 0.886 | 0.844 | 0.905 | 0.858 |
| 529 | 0.986 | 0.886 | 0.847 | 0.906 | 0.859 |
| 530 | 0.986 | 0.886 | 0.847 | 0.906 | 0.859 |
| 531 | 0.986 | 0.884 | 0.844 | 0.904 | 0.856 |
| 532 | 0.986 | 0.884 | 0.844 | 0.904 | 0.856 |
| 533 | 0.986 | 0.884 | 0.844 | 0.904 | 0.856 |
| 534 | 0.983 | 0.884 | 0.844 | 0.903 | 0.855 |
| 535 | 0.986 | 0.881 | 0.850 | 0.905 | 0.858 |
| 536 | 0.986 | 0.881 | 0.847 | 0.904 | 0.856 |
| 537 | 0.986 | 0.884 | 0.847 | 0.905 | 0.858 |
| 538 | 0.986 | 0.879 | 0.844 | 0.903 | 0.854 |
| 539 | 0.986 | 0.879 | 0.844 | 0.903 | 0.854 |
| 540 | 0.986 | 0.879 | 0.844 | 0.903 | 0.854 |
| 541 | 0.986 | 0.879 | 0.847 | 0.903 | 0.855 |
| 542 | 0.986 | 0.879 | 0.847 | 0.903 | 0.855 |

|     |       |       |       |       |       |
|-----|-------|-------|-------|-------|-------|
| 543 | 0.986 | 0.879 | 0.844 | 0.903 | 0.854 |
| 544 | 0.986 | 0.879 | 0.844 | 0.903 | 0.854 |
| 545 | 0.983 | 0.881 | 0.850 | 0.904 | 0.856 |
| 546 | 0.983 | 0.886 | 0.850 | 0.906 | 0.859 |
| 547 | 0.983 | 0.886 | 0.850 | 0.906 | 0.859 |
| 548 | 0.983 | 0.886 | 0.850 | 0.906 | 0.859 |
| 549 | 0.983 | 0.886 | 0.850 | 0.906 | 0.859 |
| 550 | 0.983 | 0.886 | 0.847 | 0.905 | 0.858 |
| 551 | 0.980 | 0.884 | 0.841 | 0.902 | 0.852 |
| 552 | 0.977 | 0.881 | 0.844 | 0.901 | 0.851 |
| 553 | 0.977 | 0.884 | 0.841 | 0.901 | 0.851 |
| 554 | 0.977 | 0.881 | 0.841 | 0.900 | 0.849 |
| 555 | 0.977 | 0.884 | 0.841 | 0.901 | 0.851 |
| 556 | 0.977 | 0.881 | 0.841 | 0.900 | 0.849 |
| 557 | 0.977 | 0.886 | 0.838 | 0.901 | 0.851 |
| 558 | 0.977 | 0.889 | 0.835 | 0.901 | 0.851 |
| 559 | 0.977 | 0.886 | 0.832 | 0.899 | 0.848 |
| 560 | 0.977 | 0.889 | 0.835 | 0.901 | 0.851 |
| 561 | 0.977 | 0.886 | 0.838 | 0.901 | 0.851 |
| 562 | 0.977 | 0.886 | 0.838 | 0.901 | 0.851 |
| 563 | 0.977 | 0.886 | 0.835 | 0.900 | 0.849 |
| 564 | 0.977 | 0.886 | 0.835 | 0.900 | 0.849 |
| 565 | 0.977 | 0.886 | 0.835 | 0.900 | 0.849 |
| 566 | 0.977 | 0.886 | 0.835 | 0.900 | 0.849 |
| 567 | 0.977 | 0.886 | 0.835 | 0.900 | 0.849 |
| 568 | 0.977 | 0.886 | 0.835 | 0.900 | 0.849 |
| 569 | 0.971 | 0.886 | 0.847 | 0.902 | 0.852 |
| 570 | 0.971 | 0.886 | 0.847 | 0.902 | 0.852 |
| 571 | 0.971 | 0.889 | 0.847 | 0.903 | 0.854 |
| 572 | 0.971 | 0.889 | 0.844 | 0.902 | 0.852 |
| 573 | 0.971 | 0.889 | 0.844 | 0.902 | 0.852 |
| 574 | 0.971 | 0.889 | 0.844 | 0.902 | 0.852 |
| 575 | 0.971 | 0.889 | 0.844 | 0.902 | 0.852 |
| 576 | 0.971 | 0.889 | 0.844 | 0.902 | 0.852 |
| 577 | 0.971 | 0.889 | 0.841 | 0.901 | 0.851 |
| 578 | 0.971 | 0.889 | 0.841 | 0.901 | 0.851 |
| 579 | 0.971 | 0.889 | 0.841 | 0.901 | 0.851 |
| 580 | 0.971 | 0.886 | 0.841 | 0.900 | 0.849 |
| 581 | 0.971 | 0.889 | 0.841 | 0.901 | 0.851 |
| 582 | 0.971 | 0.889 | 0.841 | 0.901 | 0.851 |
| 583 | 0.971 | 0.886 | 0.841 | 0.900 | 0.849 |
| 584 | 0.971 | 0.886 | 0.844 | 0.901 | 0.851 |

|     |       |       |       |       |       |
|-----|-------|-------|-------|-------|-------|
| 585 | 0.971 | 0.886 | 0.844 | 0.901 | 0.851 |
| 586 | 0.971 | 0.886 | 0.844 | 0.901 | 0.851 |
| 587 | 0.971 | 0.886 | 0.844 | 0.901 | 0.851 |
| 588 | 0.971 | 0.886 | 0.844 | 0.901 | 0.851 |
| 589 | 0.971 | 0.886 | 0.844 | 0.901 | 0.851 |
| 590 | 0.971 | 0.886 | 0.844 | 0.901 | 0.851 |
| 591 | 0.971 | 0.886 | 0.844 | 0.901 | 0.851 |
| 592 | 0.971 | 0.886 | 0.844 | 0.901 | 0.851 |
| 593 | 0.971 | 0.886 | 0.844 | 0.901 | 0.851 |
| 594 | 0.971 | 0.886 | 0.847 | 0.902 | 0.852 |
| 595 | 0.971 | 0.886 | 0.841 | 0.900 | 0.849 |
| 596 | 0.971 | 0.886 | 0.841 | 0.900 | 0.849 |
| 597 | 0.971 | 0.886 | 0.841 | 0.900 | 0.849 |
| 598 | 0.971 | 0.886 | 0.841 | 0.900 | 0.849 |
| 599 | 0.971 | 0.886 | 0.841 | 0.900 | 0.849 |
| 600 | 0.971 | 0.884 | 0.841 | 0.899 | 0.848 |
| 601 | 0.971 | 0.897 | 0.847 | 0.905 | 0.858 |
| 602 | 0.971 | 0.899 | 0.847 | 0.906 | 0.859 |
| 603 | 0.971 | 0.899 | 0.847 | 0.906 | 0.859 |
| 604 | 0.971 | 0.902 | 0.847 | 0.907 | 0.861 |
| 605 | 0.971 | 0.902 | 0.847 | 0.907 | 0.861 |
| 606 | 0.971 | 0.902 | 0.847 | 0.907 | 0.861 |
| 607 | 0.971 | 0.902 | 0.847 | 0.907 | 0.861 |
| 608 | 0.971 | 0.904 | 0.850 | 0.909 | 0.863 |
| 609 | 0.971 | 0.904 | 0.850 | 0.909 | 0.863 |
| 610 | 0.971 | 0.904 | 0.850 | 0.909 | 0.863 |
| 611 | 0.974 | 0.902 | 0.850 | 0.909 | 0.863 |
| 612 | 0.974 | 0.902 | 0.850 | 0.909 | 0.863 |
| 613 | 0.974 | 0.902 | 0.850 | 0.909 | 0.863 |
| 614 | 0.974 | 0.902 | 0.847 | 0.908 | 0.862 |
| 615 | 0.974 | 0.902 | 0.850 | 0.909 | 0.863 |
| 616 | 0.974 | 0.899 | 0.850 | 0.908 | 0.862 |
| 617 | 0.974 | 0.899 | 0.850 | 0.908 | 0.862 |
| 618 | 0.974 | 0.899 | 0.853 | 0.909 | 0.863 |
| 619 | 0.974 | 0.897 | 0.850 | 0.907 | 0.861 |
| 620 | 0.974 | 0.897 | 0.850 | 0.907 | 0.861 |
| 621 | 0.974 | 0.897 | 0.850 | 0.907 | 0.861 |
| 622 | 0.974 | 0.897 | 0.850 | 0.907 | 0.861 |
| 623 | 0.974 | 0.897 | 0.850 | 0.907 | 0.861 |
| 624 | 0.974 | 0.889 | 0.844 | 0.903 | 0.854 |
| 625 | 0.974 | 0.889 | 0.844 | 0.903 | 0.854 |
| 626 | 0.974 | 0.889 | 0.844 | 0.903 | 0.854 |

|     |       |       |       |       |       |
|-----|-------|-------|-------|-------|-------|
| 627 | 0.974 | 0.894 | 0.844 | 0.904 | 0.856 |
| 628 | 0.974 | 0.891 | 0.844 | 0.903 | 0.855 |
| 629 | 0.974 | 0.891 | 0.844 | 0.903 | 0.855 |
| 630 | 0.974 | 0.891 | 0.844 | 0.903 | 0.855 |
| 631 | 0.974 | 0.889 | 0.844 | 0.903 | 0.854 |
| 632 | 0.974 | 0.889 | 0.844 | 0.903 | 0.854 |
| 633 | 0.974 | 0.889 | 0.844 | 0.903 | 0.854 |
| 634 | 0.974 | 0.889 | 0.844 | 0.903 | 0.854 |
| 635 | 0.974 | 0.889 | 0.844 | 0.903 | 0.854 |
| 636 | 0.974 | 0.889 | 0.844 | 0.903 | 0.854 |
| 637 | 0.974 | 0.889 | 0.844 | 0.903 | 0.854 |
| 638 | 0.974 | 0.891 | 0.844 | 0.903 | 0.855 |
| 639 | 0.974 | 0.889 | 0.841 | 0.902 | 0.852 |
| 640 | 0.974 | 0.889 | 0.841 | 0.902 | 0.852 |
| 641 | 0.974 | 0.886 | 0.841 | 0.901 | 0.851 |
| 642 | 0.974 | 0.886 | 0.838 | 0.900 | 0.849 |
| 643 | 0.974 | 0.886 | 0.841 | 0.901 | 0.851 |
| 644 | 0.974 | 0.886 | 0.841 | 0.901 | 0.851 |
| 645 | 0.974 | 0.886 | 0.841 | 0.901 | 0.851 |
| 646 | 0.974 | 0.886 | 0.844 | 0.902 | 0.852 |
| 647 | 0.974 | 0.886 | 0.841 | 0.901 | 0.851 |
| 648 | 0.974 | 0.886 | 0.841 | 0.901 | 0.851 |
| 649 | 0.974 | 0.886 | 0.841 | 0.901 | 0.851 |
| 650 | 0.974 | 0.886 | 0.844 | 0.902 | 0.852 |
| 651 | 0.974 | 0.886 | 0.844 | 0.902 | 0.852 |
| 652 | 0.974 | 0.886 | 0.844 | 0.902 | 0.852 |
| 653 | 0.974 | 0.889 | 0.844 | 0.903 | 0.854 |
| 654 | 0.974 | 0.889 | 0.841 | 0.902 | 0.852 |
| 655 | 0.974 | 0.889 | 0.844 | 0.903 | 0.854 |
| 656 | 0.974 | 0.889 | 0.844 | 0.903 | 0.854 |
| 657 | 0.974 | 0.897 | 0.847 | 0.906 | 0.859 |
| 658 | 0.974 | 0.899 | 0.850 | 0.908 | 0.862 |
| 659 | 0.974 | 0.894 | 0.841 | 0.903 | 0.855 |
| 660 | 0.974 | 0.894 | 0.841 | 0.903 | 0.855 |
| 661 | 0.974 | 0.894 | 0.841 | 0.903 | 0.855 |
| 662 | 0.974 | 0.894 | 0.841 | 0.903 | 0.855 |
| 663 | 0.974 | 0.894 | 0.841 | 0.903 | 0.855 |
| 664 | 0.974 | 0.894 | 0.841 | 0.903 | 0.855 |
| 665 | 0.974 | 0.894 | 0.841 | 0.903 | 0.855 |
| 666 | 0.974 | 0.894 | 0.841 | 0.903 | 0.855 |
| 667 | 0.974 | 0.894 | 0.841 | 0.903 | 0.855 |
| 668 | 0.974 | 0.894 | 0.841 | 0.903 | 0.855 |

|     |       |       |       |       |       |
|-----|-------|-------|-------|-------|-------|
| 669 | 0.974 | 0.894 | 0.841 | 0.903 | 0.855 |
| 670 | 0.974 | 0.894 | 0.841 | 0.903 | 0.855 |
| 671 | 0.974 | 0.894 | 0.841 | 0.903 | 0.855 |
| 672 | 0.974 | 0.894 | 0.841 | 0.903 | 0.855 |
| 673 | 0.974 | 0.894 | 0.841 | 0.903 | 0.855 |
| 674 | 0.971 | 0.894 | 0.841 | 0.903 | 0.854 |
| 675 | 0.971 | 0.894 | 0.841 | 0.903 | 0.854 |
| 676 | 0.974 | 0.894 | 0.841 | 0.903 | 0.855 |
| 677 | 0.974 | 0.894 | 0.841 | 0.903 | 0.855 |
| 678 | 0.971 | 0.894 | 0.841 | 0.903 | 0.854 |
| 679 | 0.971 | 0.894 | 0.841 | 0.903 | 0.854 |
| 680 | 0.971 | 0.891 | 0.847 | 0.903 | 0.855 |
| 681 | 0.971 | 0.891 | 0.847 | 0.903 | 0.855 |
| 682 | 0.974 | 0.891 | 0.850 | 0.905 | 0.858 |
| 683 | 0.974 | 0.891 | 0.850 | 0.905 | 0.858 |
| 684 | 0.974 | 0.891 | 0.850 | 0.905 | 0.858 |
| 685 | 0.971 | 0.889 | 0.850 | 0.903 | 0.855 |
| 686 | 0.971 | 0.889 | 0.850 | 0.903 | 0.855 |
| 687 | 0.971 | 0.886 | 0.850 | 0.903 | 0.854 |
| 688 | 0.974 | 0.886 | 0.850 | 0.903 | 0.855 |
| 689 | 0.971 | 0.886 | 0.850 | 0.903 | 0.854 |
| 690 | 0.974 | 0.889 | 0.850 | 0.904 | 0.856 |
| 691 | 0.974 | 0.889 | 0.850 | 0.904 | 0.856 |
| 692 | 0.974 | 0.889 | 0.850 | 0.904 | 0.856 |
| 693 | 0.974 | 0.889 | 0.850 | 0.904 | 0.856 |
| 694 | 0.974 | 0.889 | 0.850 | 0.904 | 0.856 |
| 695 | 0.974 | 0.889 | 0.853 | 0.905 | 0.858 |
| 696 | 0.974 | 0.889 | 0.853 | 0.905 | 0.858 |
| 697 | 0.974 | 0.889 | 0.853 | 0.905 | 0.858 |
| 698 | 0.977 | 0.886 | 0.850 | 0.904 | 0.856 |
| 699 | 0.977 | 0.889 | 0.853 | 0.906 | 0.859 |
| 700 | 0.977 | 0.889 | 0.853 | 0.906 | 0.859 |
| 701 | 0.977 | 0.889 | 0.853 | 0.906 | 0.859 |
| 702 | 0.977 | 0.889 | 0.853 | 0.906 | 0.859 |
| 703 | 0.977 | 0.889 | 0.853 | 0.906 | 0.859 |
| 704 | 0.974 | 0.886 | 0.853 | 0.904 | 0.856 |
| 705 | 0.974 | 0.886 | 0.853 | 0.904 | 0.856 |
| 706 | 0.971 | 0.886 | 0.853 | 0.903 | 0.855 |
| 707 | 0.971 | 0.886 | 0.853 | 0.903 | 0.855 |
| 708 | 0.974 | 0.891 | 0.856 | 0.907 | 0.861 |
| 709 | 0.974 | 0.891 | 0.856 | 0.907 | 0.861 |
| 710 | 0.974 | 0.891 | 0.856 | 0.907 | 0.861 |



|     |       |       |       |       |       |
|-----|-------|-------|-------|-------|-------|
| 711 | 0.974 | 0.891 | 0.856 | 0.907 | 0.861 |
| 712 | 0.974 | 0.891 | 0.856 | 0.907 | 0.861 |
| 713 | 0.974 | 0.891 | 0.856 | 0.907 | 0.861 |
| 714 | 0.974 | 0.891 | 0.856 | 0.907 | 0.861 |
| 715 | 0.974 | 0.891 | 0.856 | 0.907 | 0.861 |
| 716 | 0.974 | 0.889 | 0.856 | 0.906 | 0.859 |
| 717 | 0.974 | 0.889 | 0.856 | 0.906 | 0.859 |
| 718 | 0.974 | 0.889 | 0.856 | 0.906 | 0.859 |
| 719 | 0.974 | 0.891 | 0.850 | 0.905 | 0.858 |
| 720 | 0.974 | 0.891 | 0.850 | 0.905 | 0.858 |
| 721 | 0.974 | 0.891 | 0.850 | 0.905 | 0.858 |
| 722 | 0.974 | 0.891 | 0.850 | 0.905 | 0.858 |
| 723 | 0.974 | 0.891 | 0.850 | 0.905 | 0.858 |
| 724 | 0.974 | 0.891 | 0.850 | 0.905 | 0.858 |
| 725 | 0.974 | 0.891 | 0.853 | 0.906 | 0.859 |
| 726 | 0.974 | 0.891 | 0.853 | 0.906 | 0.859 |
| 727 | 0.974 | 0.891 | 0.853 | 0.906 | 0.859 |
| 728 | 0.974 | 0.891 | 0.853 | 0.906 | 0.859 |
| 729 | 0.974 | 0.891 | 0.853 | 0.906 | 0.859 |
| 730 | 0.974 | 0.891 | 0.853 | 0.906 | 0.859 |
| 731 | 0.974 | 0.891 | 0.853 | 0.906 | 0.859 |
| 732 | 0.974 | 0.891 | 0.853 | 0.906 | 0.859 |
| 733 | 0.974 | 0.891 | 0.853 | 0.906 | 0.859 |
| 734 | 0.974 | 0.891 | 0.853 | 0.906 | 0.859 |
| 735 | 0.974 | 0.891 | 0.853 | 0.906 | 0.859 |
| 736 | 0.974 | 0.891 | 0.853 | 0.906 | 0.859 |
| 737 | 0.974 | 0.891 | 0.853 | 0.906 | 0.859 |
| 738 | 0.974 | 0.891 | 0.853 | 0.906 | 0.859 |
| 739 | 0.974 | 0.891 | 0.853 | 0.906 | 0.859 |
| 740 | 0.974 | 0.889 | 0.853 | 0.905 | 0.858 |
| 741 | 0.974 | 0.889 | 0.850 | 0.904 | 0.856 |
| 742 | 0.974 | 0.889 | 0.850 | 0.904 | 0.856 |
| 743 | 0.974 | 0.889 | 0.850 | 0.904 | 0.856 |
| 744 | 0.974 | 0.889 | 0.850 | 0.904 | 0.856 |
| 745 | 0.974 | 0.889 | 0.850 | 0.904 | 0.856 |
| 746 | 0.974 | 0.889 | 0.853 | 0.905 | 0.858 |
| 747 | 0.974 | 0.889 | 0.853 | 0.905 | 0.858 |
| 748 | 0.971 | 0.886 | 0.856 | 0.904 | 0.856 |
| 749 | 0.971 | 0.886 | 0.856 | 0.904 | 0.856 |
| 750 | 0.971 | 0.886 | 0.856 | 0.904 | 0.856 |
| 751 | 0.971 | 0.886 | 0.856 | 0.904 | 0.856 |
| 752 | 0.971 | 0.886 | 0.856 | 0.904 | 0.856 |

|     |       |       |       |       |       |
|-----|-------|-------|-------|-------|-------|
| 753 | 0.971 | 0.886 | 0.856 | 0.904 | 0.856 |
| 754 | 0.971 | 0.886 | 0.856 | 0.904 | 0.856 |
| 755 | 0.974 | 0.889 | 0.850 | 0.904 | 0.856 |
| 756 | 0.974 | 0.889 | 0.850 | 0.904 | 0.856 |
| 757 | 0.974 | 0.889 | 0.850 | 0.904 | 0.856 |
| 758 | 0.974 | 0.889 | 0.850 | 0.904 | 0.856 |
| 759 | 0.974 | 0.889 | 0.850 | 0.904 | 0.856 |
| 760 | 0.974 | 0.889 | 0.850 | 0.904 | 0.856 |
| 761 | 0.974 | 0.889 | 0.850 | 0.904 | 0.856 |
| 762 | 0.974 | 0.886 | 0.850 | 0.903 | 0.855 |
| 763 | 0.974 | 0.889 | 0.850 | 0.904 | 0.856 |
| 764 | 0.974 | 0.889 | 0.850 | 0.904 | 0.856 |
| 765 | 0.974 | 0.889 | 0.850 | 0.904 | 0.856 |
| 766 | 0.974 | 0.889 | 0.850 | 0.904 | 0.856 |
| 767 | 0.974 | 0.889 | 0.850 | 0.904 | 0.856 |
| 768 | 0.974 | 0.889 | 0.850 | 0.904 | 0.856 |
| 769 | 0.974 | 0.889 | 0.850 | 0.904 | 0.856 |
| 770 | 0.974 | 0.889 | 0.850 | 0.904 | 0.856 |
| 771 | 0.974 | 0.889 | 0.850 | 0.904 | 0.856 |
| 772 | 0.974 | 0.889 | 0.850 | 0.904 | 0.856 |
| 773 | 0.974 | 0.889 | 0.850 | 0.904 | 0.856 |
| 774 | 0.974 | 0.886 | 0.850 | 0.903 | 0.855 |
| 775 | 0.974 | 0.889 | 0.850 | 0.904 | 0.856 |
| 776 | 0.974 | 0.889 | 0.850 | 0.904 | 0.856 |
| 777 | 0.974 | 0.889 | 0.850 | 0.904 | 0.856 |
| 778 | 0.974 | 0.889 | 0.850 | 0.904 | 0.856 |
| 779 | 0.974 | 0.889 | 0.850 | 0.904 | 0.856 |
| 780 | 0.974 | 0.886 | 0.850 | 0.903 | 0.855 |
| 781 | 0.974 | 0.886 | 0.850 | 0.903 | 0.855 |
| 782 | 0.974 | 0.886 | 0.850 | 0.903 | 0.855 |
| 783 | 0.974 | 0.886 | 0.850 | 0.903 | 0.855 |
| 784 | 0.974 | 0.886 | 0.850 | 0.903 | 0.855 |
| 785 | 0.974 | 0.889 | 0.847 | 0.903 | 0.855 |
| 786 | 0.974 | 0.889 | 0.847 | 0.903 | 0.855 |
| 787 | 0.974 | 0.889 | 0.847 | 0.903 | 0.855 |
| 788 | 0.974 | 0.889 | 0.847 | 0.903 | 0.855 |
