# Supplementary material for: Identification of Human Cell Cycle Phase Markers Based on Single‐Cell RNA‐Seq Data by Using Machine Learning Methods
Source: Hindawi journal article supplement (doi:10.1155/2022/2516653), 2022-01-01
Supplement: f3 [file 2516653.f3.pdf]

**Table S3.** Feasible feature subsets selected by three feature selection methods and their intersection.

(1) Feasible feature subsets selected by three feature selection methods

| <b>mRMR</b>              | <b>MCFS</b>              | <b>SHAP by LightGBM</b>     |
|--------------------------|--------------------------|-----------------------------|
| ENSG00000170312(CDK1)    | ENSG00000170312(CDK1)    | ENSG00000170312(CDK1)       |
| ENSG00000189057(FAM111B) | ENSG00000175063(UBE2C)   | ENSG00000197061(H4C3)       |
| ENSG00000112029(FBXO5)   | ENSG00000197061(H4C3)    | ENSG00000131652(THOC6)      |
| ENSG00000131747(TOP2A)   | ENSG00000123485(HJURP)   | ENSG00000140451(PIF1)       |
| ENSG00000166801(FAM111A) | ENSG00000131747(TOP2A)   | ENSG00000175063(UBE2C)      |
| ENSG00000115641(FHL2)    | ENSG00000112029(FBXO5)   | ENSG00000229089(ANKRD20A8P) |
| ENSG00000123485(HJURP)   | ENSG00000186185(KIF18B)  | ENSG00000150991(UBC)        |
| ENSG00000171320(ESCO2)   | ENSG00000101447(FAM83D)  | ENSG00000189057(FAM111B)    |
| ENSG00000131475(VPS25)   | ENSG00000146670(CDCA5)   | ENSG00000105173(CCNE1)      |
| ENSG00000175063(UBE2C)   | ENSG00000166801(FAM111A) | ENSG00000132646(PCNA)       |
| ENSG00000051341(POLQ)    | ENSG00000140451(PIF1)    | ENSG00000101447(FAM83D)     |
| ENSG00000112118(MCM3)    | ENSG00000182481(KPNA2)   |                             |
| ENSG00000178999(AURKB)   | ENSG00000274997(H2AC12)  |                             |
| ENSG00000198331(HYLS1)   | ENSG00000169607(CKAP2L)  |                             |
| ENSG00000171848(RRM2)    | ENSG00000189057(FAM111B) |                             |
| ENSG00000085999(RAD54L)  | ENSG00000171320(ESCO2)   |                             |
| ENSG00000184661(CDCA2)   | ENSG00000276368(H2AC14)  |                             |
| ENSG00000177943(MAMDC4)  | ENSG00000137807(KIF23)   |                             |
| ENSG00000156802(ATAD2)   | ENSG00000122952(ZWINT)   |                             |
| ENSG00000093009(CDC45)   | ENSG00000134057(CCNB1)   |                             |
| ENSG00000140451(PIF1)    | ENSG00000178999(AURKB)   |                             |

|                         |  |  |
|-------------------------|--|--|
| ENSG00000165304(MELK)   |  |  |
| ENSG00000197061(H4C3)   |  |  |
| ENSG00000186185(KIF18B) |  |  |
| ENSG00000076003(MCM6)   |  |  |
| ENSG00000076248(UNG)    |  |  |
| ENSG00000146670(CDCA5)  |  |  |
| ENSG00000173207(CKS1B)  |  |  |
| ENSG00000102384(CENPI)  |  |  |
| ENSG00000274997(H2AC12) |  |  |
| ENSG00000137807(KIF23)  |  |  |
| ENSG00000105011(ASF1B)  |  |  |

(2) Intersection of three feasible feature subsets

| <b>Features appear in 3 methods</b> | <b>Features appear in 2 methods</b> | <b>Features appear in 1 method</b> |
|-------------------------------------|-------------------------------------|------------------------------------|
| ENSG00000140451(PIF1)               | ENSG00000101447(FAM83D)             | ENSG00000051341(POLQ)              |
| ENSG00000170312(CDK1)               | ENSG00000112029(FBXO5)              | ENSG00000076003(MCM6)              |
| ENSG00000175063(UBE2C)              | ENSG00000123485(HJURP)              | ENSG00000076248(UNG)               |
| ENSG00000189057(FAM111B)            | ENSG00000131747(TOP2A)              | ENSG00000085999(RAD54L)            |
| ENSG00000197061(H4C3)               | ENSG00000137807(KIF23)              | ENSG00000093009(CDC45)             |
|                                     | ENSG00000146670(CDCA5)              | ENSG00000102384(CENPI)             |
|                                     | ENSG00000166801(FAM111A)            | ENSG00000105011(ASF1B)             |
|                                     | ENSG00000171320(ESCO2)              | ENSG00000105173(CCNE1)             |
|                                     | ENSG00000178999(AURKB)              | ENSG00000112118(MCM3)              |
|                                     | ENSG00000186185(KIF18B)             | ENSG00000115641(FHL2)              |
|                                     | ENSG00000274997(H2AC12)             | ENSG00000122952(ZWINT)             |

|  |  |                             |
|--|--|-----------------------------|
|  |  | ENSG00000131475(VPS25)      |
|  |  | ENSG00000131652(THOC6)      |
|  |  | ENSG00000132646(PCNA)       |
|  |  | ENSG00000134057(CCNB1)      |
|  |  | ENSG00000150991(UBC)        |
|  |  | ENSG00000156802(ATAD2)      |
|  |  | ENSG00000165304(MELK)       |
|  |  | ENSG00000169607(CKAP2L)     |
|  |  | ENSG00000171848(RRM2)       |
|  |  | ENSG00000173207(CKS1B)      |
|  |  | ENSG00000177943(MAMDC4)     |
|  |  | ENSG00000182481(KPNA2)      |
|  |  | ENSG00000184661(CDCA2)      |
|  |  | ENSG00000198331(HYLS1)      |
|  |  | ENSG00000229089(ANKRD20A8P) |
|  |  | ENSG00000276368(H2AC14)     |
