# Supplementary material for: Identification of Human Cell Cycle Phase Markers Based on Single‐Cell RNA‐Seq Data by Using Machine Learning Methods
Source: Hindawi journal article supplement (doi:10.1155/2022/2516653), 2022-01-01
Supplement: f4 [file 2516653.f4.pdf]

**Table S4.** Classification rules generated by the optimal DT classifier based on the feature lists generated by three feature ranking algorithms

(1) Rules on features selected by mRMR

|                                        |                                                      |
|----------------------------------------|------------------------------------------------------|
| Rules_0                                | passed counts:314                                    |
| node_0: feature_name=ENSG00000170312   | feature_id[0].value <= threshold=120.56500244140625  |
| node_1: feature_name=ENSG00000197061   | feature_id[22].value <= threshold=794.760009765625   |
| node_2: feature_name=ENSG00000091164   | feature_id[113].value > threshold=29.735000610351562 |
| node_10: feature_name=ENSG00000093009  | feature_id[19].value <= threshold=198.45000457763672 |
| node_11: feature_name=ENSG00000167553  | feature_id[135].value > threshold=88.50500106811523  |
| node_13: feature_name=ENSG00000025770  | feature_id[131].value <= threshold=154.4499969482422 |
| node_14: feature_name=ENSG00000007968  | feature_id[80].value <= threshold=20.079999923706055 |
| node_15: feature_name=ENSG00000105355  | feature_id[116].value > threshold=24.335000038146973 |
| Class: G1                              |                                                      |
|                                        |                                                      |
| Rules_1                                | passed counts:227                                    |
| node_0: feature_name=ENSG00000170312   | feature_id[0].value > threshold=120.56500244140625   |
| node_34: feature_name=ENSG00000140451  | feature_id[20].value > threshold=8.110000133514404   |
| node_92: feature_name=ENSG00000105173  | feature_id[67].value <= threshold=98.07999801635742  |
| node_93: feature_name=ENSG00000170312  | feature_id[0].value > threshold=160.83999633789062   |
| node_99: feature_name=ENSG00000070950  | feature_id[108].value <= threshold=74.7750015258789  |
| node_100: feature_name=ENSG00000175130 | feature_id[152].value <= threshold=103.5099983215332 |
| node_101: feature_name=ENSG00000117724 | feature_id[111].value > threshold=42.60000038146973  |
| node_115: feature_name=ENSG00000197061 | feature_id[22].value > threshold=144.55500030517578  |
| node_125: feature_name=ENSG00000122952 | feature_id[57].value <= threshold=716.2649841308594  |
| node_126: feature_name=ENSG00000198033 | feature_id[149].value <= threshold=456.3699951171875 |

|                                        |                                                      |
|----------------------------------------|------------------------------------------------------|
| node_127: feature_name=ENSG00000178074 | feature_id[96].value <= threshold=38.650001525878906 |
| node_128: feature_name=ENSG00000006327 | feature_id[95].value <= threshold=560.8050231933594  |
| node_129: feature_name=ENSG00000175305 | feature_id[49].value <= threshold=23.119999885559082 |
| Class: G2M                             |                                                      |
|                                        |                                                      |
| Rules_2                                | passed counts:187                                    |
| node_0: feature_name=ENSG00000170312   | feature_id[0].value > threshold=120.56500244140625   |
| node_34: feature_name=ENSG00000140451  | feature_id[20].value <= threshold=8.110000133514404  |
| node_35: feature_name=ENSG00000100297  | feature_id[54].value > threshold=111.95999908447266  |
| node_57: feature_name=ENSG00000197061  | feature_id[22].value > threshold=468.4400177001953   |
| node_61: feature_name=ENSG00000012048  | feature_id[36].value > threshold=23.5600004196167    |
| node_73: feature_name=ENSG00000229089  | feature_id[37].value <= threshold=106.125            |
| node_74: feature_name=ENSG00000182481  | feature_id[35].value <= threshold=505.8800048828125  |
| node_75: feature_name=ENSG00000088325  | feature_id[143].value > threshold=14.054999828338623 |
| node_77: feature_name=ENSG00000088986  | feature_id[83].value <= threshold=1100.9449768066406 |
| node_78: feature_name=ENSG00000154473  | feature_id[156].value > threshold=64.73999786376953  |
| Class: S                               |                                                      |
|                                        |                                                      |
| Rules_3                                | passed counts:34                                     |
| node_0: feature_name=ENSG00000170312   | feature_id[0].value > threshold=120.56500244140625   |
| node_34: feature_name=ENSG00000140451  | feature_id[20].value > threshold=8.110000133514404   |
| node_92: feature_name=ENSG00000105173  | feature_id[67].value <= threshold=98.07999801635742  |
| node_93: feature_name=ENSG00000170312  | feature_id[0].value > threshold=160.83999633789062   |
| node_99: feature_name=ENSG00000070950  | feature_id[108].value <= threshold=74.7750015258789  |
| node_100: feature_name=ENSG00000175130 | feature_id[152].value <= threshold=103.5099983215332 |

|                                        |                                                       |
|----------------------------------------|-------------------------------------------------------|
| node_101: feature_name=ENSG00000117724 | feature_id[111].value <= threshold=42.60000038146973  |
| node_102: feature_name=ENSG00000128951 | feature_id[123].value > threshold=160.25              |
| node_112: feature_name=ENSG00000118193 | feature_id[82].value > threshold=2.0850000381469727   |
| Class: G2M                             |                                                       |
|                                        |                                                       |
| Rules_4                                | passed counts:34                                      |
| node_0: feature_name=ENSG00000170312   | feature_id[0].value > threshold=120.56500244140625    |
| node_34: feature_name=ENSG00000140451  | feature_id[20].value <= threshold=8.110000133514404   |
| node_35: feature_name=ENSG00000100297  | feature_id[54].value <= threshold=111.95999908447266  |
| node_36: feature_name=ENSG00000102384  | feature_id[28].value <= threshold=15.289999961853027  |
| node_37: feature_name=ENSG00000123473  | feature_id[51].value <= threshold=74.30500030517578   |
| node_38: feature_name=ENSG00000102362  | feature_id[136].value <= threshold=11.420000076293945 |
| node_39: feature_name=ENSG00000205352  | feature_id[100].value <= threshold=243.77000427246094 |
| node_40: feature_name=ENSG00000031691  | feature_id[76].value <= threshold=47.04499912261963   |
| Class: G2M                             |                                                       |
|                                        |                                                       |
| Rules_5                                | passed counts:23                                      |
| node_0: feature_name=ENSG00000170312   | feature_id[0].value > threshold=120.56500244140625    |
| node_34: feature_name=ENSG00000140451  | feature_id[20].value <= threshold=8.110000133514404   |
| node_35: feature_name=ENSG00000100297  | feature_id[54].value <= threshold=111.95999908447266  |
| node_36: feature_name=ENSG00000102384  | feature_id[28].value > threshold=15.289999961853027   |
| node_46: feature_name=ENSG00000169242  | feature_id[155].value <= threshold=16.90499973297119  |
| node_47: feature_name=ENSG00000156802  | feature_id[18].value > threshold=32.334999084472656   |
| node_51: feature_name=ENSG00000276368  | feature_id[46].value <= threshold=156.26000213623047  |
| node_52: feature_name=ENSG00000175063  | feature_id[9].value > threshold=250.1449966430664     |

|                                        |                                                      |
|----------------------------------------|------------------------------------------------------|
| Class: S                               |                                                      |
| Rules_6                                | passed counts:20                                     |
| node_0: feature_name=ENSG00000170312   | feature_id[0].value > threshold=120.56500244140625   |
| node_34: feature_name=ENSG00000140451  | feature_id[20].value > threshold=8.110000133514404   |
| node_92: feature_name=ENSG00000105173  | feature_id[67].value > threshold=98.07999801635742   |
| node_142: feature_name=ENSG00000173207 | feature_id[27].value <= threshold=529.4750061035156  |
| node_143: feature_name=ENSG00000112118 | feature_id[11].value > threshold=74.27000045776367   |
| Class: S                               |                                                      |
| Rules_7                                | passed counts:18                                     |
| node_0: feature_name=ENSG00000170312   | feature_id[0].value > threshold=120.56500244140625   |
| node_34: feature_name=ENSG00000140451  | feature_id[20].value > threshold=8.110000133514404   |
| node_92: feature_name=ENSG00000105173  | feature_id[67].value <= threshold=98.07999801635742  |
| node_93: feature_name=ENSG00000170312  | feature_id[0].value > threshold=160.83999633789062   |
| node_99: feature_name=ENSG00000070950  | feature_id[108].value <= threshold=74.7750015258789  |
| node_100: feature_name=ENSG00000175130 | feature_id[152].value <= threshold=103.5099983215332 |
| node_101: feature_name=ENSG00000117724 | feature_id[111].value > threshold=42.60000038146973  |
| node_115: feature_name=ENSG00000197061 | feature_id[22].value <= threshold=144.55500030517578 |
| node_116: feature_name=ENSG00000235571 | feature_id[119].value <= threshold=12.9350004196167  |
| node_117: feature_name=ENSG00000112118 | feature_id[11].value > threshold=30.804999351501465  |
| Class: G2M                             |                                                      |
| Rules_8                                | passed counts:15                                     |
| node_0: feature_name=ENSG00000170312   | feature_id[0].value > threshold=120.56500244140625   |

|                                        |                                                      |
|----------------------------------------|------------------------------------------------------|
| node_34: feature_name=ENSG00000140451  | feature_id[20].value > threshold=8.110000133514404   |
| node_92: feature_name=ENSG00000105173  | feature_id[67].value > threshold=98.07999801635742   |
| node_142: feature_name=ENSG00000173207 | feature_id[27].value > threshold=529.4750061035156   |
| node_148: feature_name=ENSG00000106367 | feature_id[60].value > threshold=167.65499877929688  |
| Class: G2M                             |                                                      |
| Rules_9                                | passed counts:15                                     |
| node_0: feature_name=ENSG00000170312   | feature_id[0].value > threshold=120.56500244140625   |
| node_34: feature_name=ENSG00000140451  | feature_id[20].value > threshold=8.110000133514404   |
| node_92: feature_name=ENSG00000105173  | feature_id[67].value <= threshold=98.07999801635742  |
| node_93: feature_name=ENSG00000170312  | feature_id[0].value > threshold=160.83999633789062   |
| node_99: feature_name=ENSG00000070950  | feature_id[108].value <= threshold=74.7750015258789  |
| node_100: feature_name=ENSG00000175130 | feature_id[152].value <= threshold=103.5099983215332 |
| node_101: feature_name=ENSG00000117724 | feature_id[111].value <= threshold=42.60000038146973 |
| node_102: feature_name=ENSG00000128951 | feature_id[123].value <= threshold=160.25            |
| node_103: feature_name=ENSG00000105011 | feature_id[31].value <= threshold=61.09000015258789  |
| node_104: feature_name=ENSG00000163808 | feature_id[89].value <= threshold=9.610000133514404  |
| node_105: feature_name=ENSG00000123975 | feature_id[90].value <= threshold=1455.4949951171875 |
| Class: G2M                             |                                                      |
| Rules_10                               | passed counts:14                                     |
| node_0: feature_name=ENSG00000170312   | feature_id[0].value > threshold=120.56500244140625   |
| node_34: feature_name=ENSG00000140451  | feature_id[20].value <= threshold=8.110000133514404  |
| node_35: feature_name=ENSG00000100297  | feature_id[54].value > threshold=111.95999908447266  |
| node_57: feature_name=ENSG00000197061  | feature_id[22].value > threshold=468.4400177001953   |

|                                       |                                                      |
|---------------------------------------|------------------------------------------------------|
| node_61: feature_name=ENSG0000012048  | feature_id[36].value > threshold=23.560004196167     |
| node_73: feature_name=ENSG00000229089 | feature_id[37].value <= threshold=106.125            |
| node_74: feature_name=ENSG00000182481 | feature_id[35].value > threshold=505.8800048828125   |
| node_84: feature_name=ENSG00000146278 | feature_id[64].value > threshold=0.7649999856948853  |
| Class: S                              |                                                      |
| Rules_11                              | passed counts:11                                     |
| node_0: feature_name=ENSG00000170312  | feature_id[0].value > threshold=120.56500244140625   |
| node_34: feature_name=ENSG00000140451 | feature_id[20].value <= threshold=8.110000133514404  |
| node_35: feature_name=ENSG00000100297 | feature_id[54].value > threshold=111.95999908447266  |
| node_57: feature_name=ENSG00000197061 | feature_id[22].value > threshold=468.4400177001953   |
| node_61: feature_name=ENSG0000012048  | feature_id[36].value <= threshold=23.560004196167    |
| node_62: feature_name=ENSG00000135451 | feature_id[43].value > threshold=42.31999969482422   |
| node_66: feature_name=ENSG0000013573  | feature_id[92].value <= threshold=54.625             |
| node_67: feature_name=ENSG00000171793 | feature_id[58].value <= threshold=282.51499938964844 |
| Class: G2M                            |                                                      |
| Rules_12                              | passed counts:11                                     |
| node_0: feature_name=ENSG00000170312  | feature_id[0].value <= threshold=120.56500244140625  |
| node_1: feature_name=ENSG00000197061  | feature_id[22].value > threshold=794.760009765625    |
| node_29: feature_name=ENSG00000164104 | feature_id[50].value > threshold=51.71500015258789   |
| Class: S                              |                                                      |
| Rules_13                              | passed counts:10                                     |
| node_0: feature_name=ENSG00000170312  | feature_id[0].value > threshold=120.56500244140625   |

|                                        |                                                      |
|----------------------------------------|------------------------------------------------------|
| node_34: feature_name=ENSG00000140451  | feature_id[20].value > threshold=8.110000133514404   |
| node_92: feature_name=ENSG00000105173  | feature_id[67].value <= threshold=98.07999801635742  |
| node_93: feature_name=ENSG00000170312  | feature_id[0].value > threshold=160.83999633789062   |
| node_99: feature_name=ENSG00000070950  | feature_id[108].value <= threshold=74.7750015258789  |
| node_100: feature_name=ENSG00000175130 | feature_id[152].value <= threshold=103.5099983215332 |
| node_101: feature_name=ENSG00000117724 | feature_id[111].value <= threshold=42.60000038146973 |
| node_102: feature_name=ENSG00000128951 | feature_id[123].value <= threshold=160.25            |
| node_103: feature_name=ENSG00000105011 | feature_id[31].value > threshold=61.09000015258789   |
| node_109: feature_name=ENSG00000136982 | feature_id[112].value > threshold=17.335000038146973 |
| Class: S                               |                                                      |
|                                        |                                                      |
| Rules_14                               | passed counts:8                                      |
| node_0: feature_name=ENSG00000170312   | feature_id[0].value > threshold=120.56500244140625   |
| node_34: feature_name=ENSG00000140451  | feature_id[20].value <= threshold=8.110000133514404  |
| node_35: feature_name=ENSG00000100297  | feature_id[54].value > threshold=111.95999908447266  |
| node_57: feature_name=ENSG00000197061  | feature_id[22].value > threshold=468.4400177001953   |
| node_61: feature_name=ENSG00000012048  | feature_id[36].value <= threshold=23.5600004196167   |
| node_62: feature_name=ENSG00000135451  | feature_id[43].value <= threshold=42.31999969482422  |
| node_63: feature_name=ENSG00000148773  | feature_id[73].value > threshold=24.8149995803833    |
| Class: S                               |                                                      |
|                                        |                                                      |
| Rules_15                               | passed counts:7                                      |
| node_0: feature_name=ENSG00000170312   | feature_id[0].value > threshold=120.56500244140625   |
| node_34: feature_name=ENSG00000140451  | feature_id[20].value > threshold=8.110000133514404   |
| node_92: feature_name=ENSG00000105173  | feature_id[67].value <= threshold=98.07999801635742  |

|                                        |                                                      |
|----------------------------------------|------------------------------------------------------|
| node_93: feature_name=ENSG00000170312  | feature_id[0].value > threshold=160.83999633789062   |
| node_99: feature_name=ENSG00000070950  | feature_id[108].value <= threshold=74.7750015258789  |
| node_100: feature_name=ENSG00000175130 | feature_id[152].value <= threshold=103.5099983215332 |
| node_101: feature_name=ENSG00000117724 | feature_id[111].value > threshold=42.60000038146973  |
| node_115: feature_name=ENSG00000197061 | feature_id[22].value <= threshold=144.55500030517578 |
| node_116: feature_name=ENSG00000235571 | feature_id[119].value > threshold=12.9350004196167   |
| node_122: feature_name=ENSG00000142945 | feature_id[86].value > threshold=156.95000457763672  |
| Class: S                               |                                                      |
| Rules_16                               | passed counts:7                                      |
| node_0: feature_name=ENSG00000170312   | feature_id[0].value > threshold=120.56500244140625   |
| node_34: feature_name=ENSG00000140451  | feature_id[20].value <= threshold=8.110000133514404  |
| node_35: feature_name=ENSG00000100297  | feature_id[54].value > threshold=111.95999908447266  |
| node_57: feature_name=ENSG00000197061  | feature_id[22].value <= threshold=468.4400177001953  |
| node_58: feature_name=ENSG00000127922  | feature_id[94].value > threshold=402.9700012207031   |
| Class: G1                              |                                                      |
| Rules_17                               | passed counts:5                                      |
| node_0: feature_name=ENSG00000170312   | feature_id[0].value > threshold=120.56500244140625   |
| node_34: feature_name=ENSG00000140451  | feature_id[20].value > threshold=8.110000133514404   |
| node_92: feature_name=ENSG00000105173  | feature_id[67].value <= threshold=98.07999801635742  |
| node_93: feature_name=ENSG00000170312  | feature_id[0].value <= threshold=160.83999633789062  |
| node_94: feature_name=ENSG00000182481  | feature_id[35].value > threshold=678.3799743652344   |
| Class: G1                              |                                                      |



|                                        |                                                      |
|----------------------------------------|------------------------------------------------------|
| Rules_18                               | passed counts:5                                      |
| node_0: feature_name=ENSG00000170312   | feature_id[0].value > threshold=120.56500244140625   |
| node_34: feature_name=ENSG00000140451  | feature_id[20].value <= threshold=8.110000133514404  |
| node_35: feature_name=ENSG00000100297  | feature_id[54].value > threshold=111.95999908447266  |
| node_57: feature_name=ENSG00000197061  | feature_id[22].value > threshold=468.4400177001953   |
| node_61: feature_name=ENSG0000012048   | feature_id[36].value > threshold=23.5600004196167    |
| node_73: feature_name=ENSG00000229089  | feature_id[37].value <= threshold=106.125            |
| node_74: feature_name=ENSG00000182481  | feature_id[35].value > threshold=505.8800048828125   |
| node_84: feature_name=ENSG00000146278  | feature_id[64].value <= threshold=0.7649999856948853 |
| node_85: feature_name=ENSG00000025770  | feature_id[131].value > threshold=91.17000198364258  |
| Class: G2M                             |                                                      |
| Rules_19                               | passed counts:5                                      |
| node_0: feature_name=ENSG00000170312   | feature_id[0].value > threshold=120.56500244140625   |
| node_34: feature_name=ENSG00000140451  | feature_id[20].value <= threshold=8.110000133514404  |
| node_35: feature_name=ENSG00000100297  | feature_id[54].value <= threshold=111.95999908447266 |
| node_36: feature_name=ENSG00000102384  | feature_id[28].value > threshold=15.289999961853027  |
| node_46: feature_name=ENSG00000169242  | feature_id[155].value > threshold=16.90499973297119  |
| Class: G2M                             |                                                      |
| Rules_20                               | passed counts:4                                      |
| node_0: feature_name=ENSG00000170312   | feature_id[0].value > threshold=120.56500244140625   |
| node_34: feature_name=ENSG00000140451  | feature_id[20].value > threshold=8.110000133514404   |
| node_92: feature_name=ENSG00000105173  | feature_id[67].value > threshold=98.07999801635742   |
| node_142: feature_name=ENSG00000173207 | feature_id[27].value <= threshold=529.4750061035156  |

|                                        |                                                      |
|----------------------------------------|------------------------------------------------------|
| node_143: feature_name=ENSG00000112118 | feature_id[11].value <= threshold=74.27000045776367  |
| node_144: feature_name=ENSG00000106211 | feature_id[87].value > threshold=406.1999969482422   |
| Class: G2M                             |                                                      |
|                                        |                                                      |
| Rules_21                               | passed counts:4                                      |
| node_0: feature_name=ENSG00000170312   | feature_id[0].value <= threshold=120.56500244140625  |
| node_1: feature_name=ENSG00000197061   | feature_id[22].value > threshold=794.760009765625    |
| node_29: feature_name=ENSG00000164104  | feature_id[50].value <= threshold=51.71500015258789  |
| node_30: feature_name=ENSG00000103995  | feature_id[132].value > threshold=4.700000047683716  |
| Class: G1                              |                                                      |
|                                        |                                                      |
| Rules_22                               | passed counts:3                                      |
| node_0: feature_name=ENSG00000170312   | feature_id[0].value > threshold=120.56500244140625   |
| node_34: feature_name=ENSG00000140451  | feature_id[20].value > threshold=8.110000133514404   |
| node_92: feature_name=ENSG00000105173  | feature_id[67].value > threshold=98.07999801635742   |
| node_142: feature_name=ENSG00000173207 | feature_id[27].value > threshold=529.4750061035156   |
| node_148: feature_name=ENSG00000106367 | feature_id[60].value <= threshold=167.65499877929688 |
| Class: S                               |                                                      |
|                                        |                                                      |
| Rules_23                               | passed counts:3                                      |
| node_0: feature_name=ENSG00000170312   | feature_id[0].value > threshold=120.56500244140625   |
| node_34: feature_name=ENSG00000140451  | feature_id[20].value > threshold=8.110000133514404   |
| node_92: feature_name=ENSG00000105173  | feature_id[67].value <= threshold=98.07999801635742  |
| node_93: feature_name=ENSG00000170312  | feature_id[0].value > threshold=160.83999633789062   |
| node_99: feature_name=ENSG00000070950  | feature_id[108].value > threshold=74.7750015258789   |

|                                        |                                                      |
|----------------------------------------|------------------------------------------------------|
| Class: S                               |                                                      |
| Rules_24                               | passed counts:3                                      |
| node_0: feature_name=ENSG00000170312   | feature_id[0].value > threshold=120.56500244140625   |
| node_34: feature_name=ENSG00000140451  | feature_id[20].value > threshold=8.110000133514404   |
| node_92: feature_name=ENSG00000105173  | feature_id[67].value <= threshold=98.07999801635742  |
| node_93: feature_name=ENSG00000170312  | feature_id[0].value > threshold=160.83999633789062   |
| node_99: feature_name=ENSG00000070950  | feature_id[108].value <= threshold=74.7750015258789  |
| node_100: feature_name=ENSG00000175130 | feature_id[152].value > threshold=103.5099983215332  |
| node_138: feature_name=ENSG00000101447 | feature_id[32].value > threshold=154.69000244140625  |
| Class: S                               |                                                      |
| Rules_25                               | passed counts:3                                      |
| node_0: feature_name=ENSG00000170312   | feature_id[0].value > threshold=120.56500244140625   |
| node_34: feature_name=ENSG00000140451  | feature_id[20].value > threshold=8.110000133514404   |
| node_92: feature_name=ENSG00000105173  | feature_id[67].value <= threshold=98.07999801635742  |
| node_93: feature_name=ENSG00000170312  | feature_id[0].value > threshold=160.83999633789062   |
| node_99: feature_name=ENSG00000070950  | feature_id[108].value <= threshold=74.7750015258789  |
| node_100: feature_name=ENSG00000175130 | feature_id[152].value <= threshold=103.5099983215332 |
| node_101: feature_name=ENSG00000117724 | feature_id[111].value <= threshold=42.60000038146973 |
| node_102: feature_name=ENSG00000128951 | feature_id[123].value <= threshold=160.25            |
| node_103: feature_name=ENSG00000105011 | feature_id[31].value <= threshold=61.09000015258789  |
| node_104: feature_name=ENSG00000163808 | feature_id[89].value > threshold=9.610000133514404   |
| Class: S                               |                                                      |

|                                       |                                                      |
|---------------------------------------|------------------------------------------------------|
| Rules_26                              | passed counts:3                                      |
| node_0: feature_name=ENSG00000170312  | feature_id[0].value > threshold=120.56500244140625   |
| node_34: feature_name=ENSG00000140451 | feature_id[20].value > threshold=8.110000133514404   |
| node_92: feature_name=ENSG00000105173 | feature_id[67].value <= threshold=98.07999801635742  |
| node_93: feature_name=ENSG00000170312 | feature_id[0].value <= threshold=160.83999633789062  |
| node_94: feature_name=ENSG00000182481 | feature_id[35].value <= threshold=678.3799743652344  |
| node_95: feature_name=ENSG00000103995 | feature_id[132].value > threshold=9.0                |
| Class: S                              |                                                      |
| Rules_27                              | passed counts:3                                      |
| node_0: feature_name=ENSG00000170312  | feature_id[0].value > threshold=120.56500244140625   |
| node_34: feature_name=ENSG00000140451 | feature_id[20].value <= threshold=8.110000133514404  |
| node_35: feature_name=ENSG00000100297 | feature_id[54].value > threshold=111.95999908447266  |
| node_57: feature_name=ENSG00000197061 | feature_id[22].value > threshold=468.4400177001953   |
| node_61: feature_name=ENSG00000012048 | feature_id[36].value > threshold=23.5600004196167    |
| node_73: feature_name=ENSG00000229089 | feature_id[37].value <= threshold=106.125            |
| node_74: feature_name=ENSG00000182481 | feature_id[35].value > threshold=505.8800048828125   |
| node_84: feature_name=ENSG00000146278 | feature_id[64].value <= threshold=0.7649999856948853 |
| node_85: feature_name=ENSG00000025770 | feature_id[131].value <= threshold=91.17000198364258 |
| node_86: feature_name=ENSG00000229089 | feature_id[37].value > threshold=18.195000171661377  |
| Class: S                              |                                                      |
| Rules_28                              | passed counts:3                                      |
| node_0: feature_name=ENSG00000170312  | feature_id[0].value > threshold=120.56500244140625   |
| node_34: feature_name=ENSG00000140451 | feature_id[20].value <= threshold=8.110000133514404  |

|                                       |                                                       |
|---------------------------------------|-------------------------------------------------------|
| node_35: feature_name=ENSG00000100297 | feature_id[54].value > threshold=111.95999908447266   |
| node_57: feature_name=ENSG00000197061 | feature_id[22].value > threshold=468.4400177001953    |
| node_61: feature_name=ENSG00000012048 | feature_id[36].value <= threshold=23.5600004196167    |
| node_62: feature_name=ENSG00000135451 | feature_id[43].value > threshold=42.31999969482422    |
| node_66: feature_name=ENSG00000013573 | feature_id[92].value > threshold=54.625               |
| Class: S                              |                                                       |
|                                       |                                                       |
| Rules_29                              | passed counts:3                                       |
| node_0: feature_name=ENSG00000170312  | feature_id[0].value > threshold=120.56500244140625    |
| node_34: feature_name=ENSG00000140451 | feature_id[20].value <= threshold=8.110000133514404   |
| node_35: feature_name=ENSG00000100297 | feature_id[54].value <= threshold=111.95999908447266  |
| node_36: feature_name=ENSG00000102384 | feature_id[28].value <= threshold=15.289999961853027  |
| node_37: feature_name=ENSG00000123473 | feature_id[51].value > threshold=74.30500030517578    |
| Class: S                              |                                                       |
|                                       |                                                       |
| Rules_30                              | passed counts:3                                       |
| node_0: feature_name=ENSG00000170312  | feature_id[0].value <= threshold=120.56500244140625   |
| node_1: feature_name=ENSG00000197061  | feature_id[22].value <= threshold=794.760009765625    |
| node_2: feature_name=ENSG00000091164  | feature_id[113].value > threshold=29.735000610351562  |
| node_10: feature_name=ENSG00000093009 | feature_id[19].value <= threshold=198.45000457763672  |
| node_11: feature_name=ENSG00000167553 | feature_id[135].value > threshold=88.50500106811523   |
| node_13: feature_name=ENSG00000025770 | feature_id[131].value <= threshold=154.4499969482422  |
| node_14: feature_name=ENSG00000007968 | feature_id[80].value <= threshold=20.079999923706055  |
| node_15: feature_name=ENSG00000105355 | feature_id[116].value <= threshold=24.335000038146973 |
| node_16: feature_name=ENSG00000178999 | feature_id[12].value <= threshold=10.694999694824219  |

|                                      |                                                       |
|--------------------------------------|-------------------------------------------------------|
| Class: G1                            |                                                       |
| Rules_31                             | passed counts:3                                       |
| node_0: feature_name=ENSG00000170312 | feature_id[0].value <= threshold=120.56500244140625   |
| node_1: feature_name=ENSG00000197061 | feature_id[22].value <= threshold=794.760009765625    |
| node_2: feature_name=ENSG00000091164 | feature_id[113].value <= threshold=29.735000610351562 |
| node_3: feature_name=ENSG00000137310 | feature_id[71].value > threshold=4.164999961853027    |
| Class: S                             |                                                       |
| Rules_32                             | passed counts:3                                       |
| node_0: feature_name=ENSG00000170312 | feature_id[0].value <= threshold=120.56500244140625   |
| node_1: feature_name=ENSG00000197061 | feature_id[22].value <= threshold=794.760009765625    |
| node_2: feature_name=ENSG00000091164 | feature_id[113].value <= threshold=29.735000610351562 |
| node_3: feature_name=ENSG00000137310 | feature_id[71].value <= threshold=4.164999961853027   |
| node_4: feature_name=ENSG00000196230 | feature_id[61].value > threshold=1130.8150024414062   |
| Class: G1                            |                                                       |
| Rules_33                             | passed counts:3                                       |
| node_0: feature_name=ENSG00000170312 | feature_id[0].value <= threshold=120.56500244140625   |
| node_1: feature_name=ENSG00000197061 | feature_id[22].value <= threshold=794.760009765625    |
| node_2: feature_name=ENSG00000091164 | feature_id[113].value <= threshold=29.735000610351562 |
| node_3: feature_name=ENSG00000137310 | feature_id[71].value <= threshold=4.164999961853027   |
| node_4: feature_name=ENSG00000196230 | feature_id[61].value <= threshold=1130.8150024414062  |
| node_5: feature_name=ENSG00000100097 | feature_id[68].value <= threshold=13833.3251953125    |
| Class: G2M                           |                                                       |

|                                        |                                                      |
|----------------------------------------|------------------------------------------------------|
| Rules_34                               | passed counts:2                                      |
| node_0: feature_name=ENSG00000170312   | feature_id[0].value > threshold=120.56500244140625   |
| node_34: feature_name=ENSG00000140451  | feature_id[20].value > threshold=8.110000133514404   |
| node_92: feature_name=ENSG00000105173  | feature_id[67].value <= threshold=98.07999801635742  |
| node_93: feature_name=ENSG00000170312  | feature_id[0].value > threshold=160.83999633789062   |
| node_99: feature_name=ENSG00000070950  | feature_id[108].value <= threshold=74.7750015258789  |
| node_100: feature_name=ENSG00000175130 | feature_id[152].value <= threshold=103.5099983215332 |
| node_101: feature_name=ENSG00000117724 | feature_id[111].value > threshold=42.60000038146973  |
| node_115: feature_name=ENSG00000197061 | feature_id[22].value <= threshold=144.55500030517578 |
| node_116: feature_name=ENSG00000235571 | feature_id[119].value > threshold=12.9350004196167   |
| node_122: feature_name=ENSG00000142945 | feature_id[86].value <= threshold=156.95000457763672 |
| Class: G2M                             |                                                      |
| Rules_35                               | passed counts:2                                      |
| node_0: feature_name=ENSG00000170312   | feature_id[0].value > threshold=120.56500244140625   |
| node_34: feature_name=ENSG00000140451  | feature_id[20].value > threshold=8.110000133514404   |
| node_92: feature_name=ENSG00000105173  | feature_id[67].value <= threshold=98.07999801635742  |
| node_93: feature_name=ENSG00000170312  | feature_id[0].value > threshold=160.83999633789062   |
| node_99: feature_name=ENSG00000070950  | feature_id[108].value <= threshold=74.7750015258789  |
| node_100: feature_name=ENSG00000175130 | feature_id[152].value <= threshold=103.5099983215332 |
| node_101: feature_name=ENSG00000117724 | feature_id[111].value <= threshold=42.60000038146973 |
| node_102: feature_name=ENSG00000128951 | feature_id[123].value > threshold=160.25             |
| node_112: feature_name=ENSG00000118193 | feature_id[82].value <= threshold=2.0850000381469727 |
| Class: S                               |                                                      |

|                                       |                                                      |
|---------------------------------------|------------------------------------------------------|
| Rules_36                              | passed counts:2                                      |
| node_0: feature_name=ENSG00000170312  | feature_id[0].value > threshold=120.56500244140625   |
| node_34: feature_name=ENSG00000140451 | feature_id[20].value <= threshold=8.110000133514404  |
| node_35: feature_name=ENSG00000100297 | feature_id[54].value > threshold=111.95999908447266  |
| node_57: feature_name=ENSG00000197061 | feature_id[22].value > threshold=468.4400177001953   |
| node_61: feature_name=ENSG00000012048 | feature_id[36].value > threshold=23.5600004196167    |
| node_73: feature_name=ENSG00000229089 | feature_id[37].value > threshold=106.125             |
| Class: G2M                            |                                                      |
| Rules_37                              | passed counts:2                                      |
| node_0: feature_name=ENSG00000170312  | feature_id[0].value > threshold=120.56500244140625   |
| node_34: feature_name=ENSG00000140451 | feature_id[20].value <= threshold=8.110000133514404  |
| node_35: feature_name=ENSG00000100297 | feature_id[54].value > threshold=111.95999908447266  |
| node_57: feature_name=ENSG00000197061 | feature_id[22].value > threshold=468.4400177001953   |
| node_61: feature_name=ENSG00000012048 | feature_id[36].value <= threshold=23.5600004196167   |
| node_62: feature_name=ENSG00000135451 | feature_id[43].value > threshold=42.31999969482422   |
| node_66: feature_name=ENSG00000013573 | feature_id[92].value <= threshold=54.625             |
| node_67: feature_name=ENSG00000171793 | feature_id[58].value > threshold=282.51499938964844  |
| node_69: feature_name=ENSG00000152253 | feature_id[140].value <= threshold=84.25500106811523 |
| Class: S                              |                                                      |
| Rules_38                              | passed counts:2                                      |
| node_0: feature_name=ENSG00000170312  | feature_id[0].value > threshold=120.56500244140625   |
| node_34: feature_name=ENSG00000140451 | feature_id[20].value <= threshold=8.110000133514404  |



|                                       |                                                      |
|---------------------------------------|------------------------------------------------------|
| node_35: feature_name=ENSG00000100297 | feature_id[54].value > threshold=111.95999908447266  |
| node_57: feature_name=ENSG00000197061 | feature_id[22].value > threshold=468.4400177001953   |
| node_61: feature_name=ENSG00000012048 | feature_id[36].value <= threshold=23.5600004196167   |
| node_62: feature_name=ENSG00000135451 | feature_id[43].value <= threshold=42.31999969482422  |
| node_63: feature_name=ENSG00000148773 | feature_id[73].value <= threshold=24.8149995803833   |
| Class: G1                             |                                                      |
| Rules_39                              | passed counts:2                                      |
| node_0: feature_name=ENSG00000170312  | feature_id[0].value > threshold=120.56500244140625   |
| node_34: feature_name=ENSG00000140451 | feature_id[20].value <= threshold=8.110000133514404  |
| node_35: feature_name=ENSG00000100297 | feature_id[54].value > threshold=111.95999908447266  |
| node_57: feature_name=ENSG00000197061 | feature_id[22].value <= threshold=468.4400177001953  |
| node_58: feature_name=ENSG00000127922 | feature_id[94].value <= threshold=402.9700012207031  |
| Class: S                              |                                                      |
| Rules_40                              | passed counts:2                                      |
| node_0: feature_name=ENSG00000170312  | feature_id[0].value > threshold=120.56500244140625   |
| node_34: feature_name=ENSG00000140451 | feature_id[20].value <= threshold=8.110000133514404  |
| node_35: feature_name=ENSG00000100297 | feature_id[54].value <= threshold=111.95999908447266 |
| node_36: feature_name=ENSG00000102384 | feature_id[28].value > threshold=15.289999961853027  |
| node_46: feature_name=ENSG00000169242 | feature_id[155].value <= threshold=16.90499973297119 |
| node_47: feature_name=ENSG00000156802 | feature_id[18].value > threshold=32.334999084472656  |
| node_51: feature_name=ENSG00000276368 | feature_id[46].value > threshold=156.26000213623047  |
| Class: G2M                            |                                                      |

|                                       |                                                      |
|---------------------------------------|------------------------------------------------------|
| Rules_41                              | passed counts:2                                      |
| node_0: feature_name=ENSG00000170312  | feature_id[0].value > threshold=120.56500244140625   |
| node_34: feature_name=ENSG00000140451 | feature_id[20].value <= threshold=8.110000133514404  |
| node_35: feature_name=ENSG00000100297 | feature_id[54].value <= threshold=111.95999908447266 |
| node_36: feature_name=ENSG00000102384 | feature_id[28].value > threshold=15.289999961853027  |
| node_46: feature_name=ENSG00000169242 | feature_id[155].value <= threshold=16.90499973297119 |
| node_47: feature_name=ENSG00000156802 | feature_id[18].value <= threshold=32.334999084472656 |
| node_48: feature_name=ENSG00000175573 | feature_id[145].value <= threshold=92.84999656677246 |
| Class: G1                             |                                                      |
| Rules_42                              | passed counts:2                                      |
| node_0: feature_name=ENSG00000170312  | feature_id[0].value > threshold=120.56500244140625   |
| node_34: feature_name=ENSG00000140451 | feature_id[20].value <= threshold=8.110000133514404  |
| node_35: feature_name=ENSG00000100297 | feature_id[54].value <= threshold=111.95999908447266 |
| node_36: feature_name=ENSG00000102384 | feature_id[28].value <= threshold=15.289999961853027 |
| node_37: feature_name=ENSG00000123473 | feature_id[51].value <= threshold=74.30500030517578  |
| node_38: feature_name=ENSG00000102362 | feature_id[136].value > threshold=11.420000076293945 |
| Class: S                              |                                                      |
| Rules_43                              | passed counts:2                                      |
| node_0: feature_name=ENSG00000170312  | feature_id[0].value <= threshold=120.56500244140625  |
| node_1: feature_name=ENSG00000197061  | feature_id[22].value > threshold=794.760009765625    |
| node_29: feature_name=ENSG00000164104 | feature_id[50].value <= threshold=51.71500015258789  |
| node_30: feature_name=ENSG00000103995 | feature_id[132].value <= threshold=4.700000047683716 |
| Class: S                              |                                                      |

|                                        |                                                      |
|----------------------------------------|------------------------------------------------------|
| Rules_44                               | passed counts:2                                      |
| node_0: feature_name=ENSG00000170312   | feature_id[0].value <= threshold=120.56500244140625  |
| node_1: feature_name=ENSG00000197061   | feature_id[22].value <= threshold=794.760009765625   |
| node_2: feature_name=ENSG00000091164   | feature_id[113].value > threshold=29.735000610351562 |
| node_10: feature_name=ENSG00000093009  | feature_id[19].value > threshold=198.45000457763672  |
| Class: S                               |                                                      |
| Rules_45                               | passed counts:1                                      |
| node_0: feature_name=ENSG00000170312   | feature_id[0].value > threshold=120.56500244140625   |
| node_34: feature_name=ENSG00000140451  | feature_id[20].value > threshold=8.110000133514404   |
| node_92: feature_name=ENSG00000105173  | feature_id[67].value > threshold=98.07999801635742   |
| node_142: feature_name=ENSG00000173207 | feature_id[27].value <= threshold=529.4750061035156  |
| node_143: feature_name=ENSG00000112118 | feature_id[11].value <= threshold=74.27000045776367  |
| node_144: feature_name=ENSG00000106211 | feature_id[87].value <= threshold=406.1999969482422  |
| Class: S                               |                                                      |
| Rules_46                               | passed counts:1                                      |
| node_0: feature_name=ENSG00000170312   | feature_id[0].value > threshold=120.56500244140625   |
| node_34: feature_name=ENSG00000140451  | feature_id[20].value > threshold=8.110000133514404   |
| node_92: feature_name=ENSG00000105173  | feature_id[67].value <= threshold=98.07999801635742  |
| node_93: feature_name=ENSG00000170312  | feature_id[0].value > threshold=160.83999633789062   |
| node_99: feature_name=ENSG00000070950  | feature_id[108].value <= threshold=74.7750015258789  |
| node_100: feature_name=ENSG00000175130 | feature_id[152].value > threshold=103.5099983215332  |
| node_138: feature_name=ENSG00000101447 | feature_id[32].value <= threshold=154.69000244140625 |

|                                        |                                                      |
|----------------------------------------|------------------------------------------------------|
| Class: G2M                             |                                                      |
| Rules_47                               | passed counts: 1                                     |
| node_0: feature_name=ENSG00000170312   | feature_id[0].value > threshold=120.56500244140625   |
| node_34: feature_name=ENSG00000140451  | feature_id[20].value > threshold=8.110000133514404   |
| node_92: feature_name=ENSG00000105173  | feature_id[67].value <= threshold=98.07999801635742  |
| node_93: feature_name=ENSG00000170312  | feature_id[0].value > threshold=160.83999633789062   |
| node_99: feature_name=ENSG00000070950  | feature_id[108].value <= threshold=74.7750015258789  |
| node_100: feature_name=ENSG00000175130 | feature_id[152].value <= threshold=103.5099983215332 |
| node_101: feature_name=ENSG00000117724 | feature_id[111].value > threshold=42.60000038146973  |
| node_115: feature_name=ENSG00000197061 | feature_id[22].value > threshold=144.55500030517578  |
| node_125: feature_name=ENSG00000122952 | feature_id[57].value > threshold=716.2649841308594   |
| Class: S                               |                                                      |
| Rules_48                               | passed counts: 1                                     |
| node_0: feature_name=ENSG00000170312   | feature_id[0].value > threshold=120.56500244140625   |
| node_34: feature_name=ENSG00000140451  | feature_id[20].value > threshold=8.110000133514404   |
| node_92: feature_name=ENSG00000105173  | feature_id[67].value <= threshold=98.07999801635742  |
| node_93: feature_name=ENSG00000170312  | feature_id[0].value > threshold=160.83999633789062   |
| node_99: feature_name=ENSG00000070950  | feature_id[108].value <= threshold=74.7750015258789  |
| node_100: feature_name=ENSG00000175130 | feature_id[152].value <= threshold=103.5099983215332 |
| node_101: feature_name=ENSG00000117724 | feature_id[111].value > threshold=42.60000038146973  |
| node_115: feature_name=ENSG00000197061 | feature_id[22].value > threshold=144.55500030517578  |
| node_125: feature_name=ENSG00000122952 | feature_id[57].value <= threshold=716.2649841308594  |
| node_126: feature_name=ENSG00000198033 | feature_id[149].value > threshold=456.3699951171875  |

|                                        |                                                      |
|----------------------------------------|------------------------------------------------------|
| Class: S                               |                                                      |
| Rules_49                               | passed counts: 1                                     |
| node_0: feature_name=ENSG00000170312   | feature_id[0].value > threshold=120.56500244140625   |
| node_34: feature_name=ENSG00000140451  | feature_id[20].value > threshold=8.110000133514404   |
| node_92: feature_name=ENSG00000105173  | feature_id[67].value <= threshold=98.07999801635742  |
| node_93: feature_name=ENSG00000170312  | feature_id[0].value > threshold=160.83999633789062   |
| node_99: feature_name=ENSG00000070950  | feature_id[108].value <= threshold=74.7750015258789  |
| node_100: feature_name=ENSG00000175130 | feature_id[152].value <= threshold=103.5099983215332 |
| node_101: feature_name=ENSG00000117724 | feature_id[111].value > threshold=42.60000038146973  |
| node_115: feature_name=ENSG00000197061 | feature_id[22].value > threshold=144.55500030517578  |
| node_125: feature_name=ENSG00000122952 | feature_id[57].value <= threshold=716.2649841308594  |
| node_126: feature_name=ENSG00000198033 | feature_id[149].value <= threshold=456.3699951171875 |
| node_127: feature_name=ENSG00000178074 | feature_id[96].value > threshold=38.650001525878906  |
| Class: S                               |                                                      |
| Rules_50                               | passed counts: 1                                     |
| node_0: feature_name=ENSG00000170312   | feature_id[0].value > threshold=120.56500244140625   |
| node_34: feature_name=ENSG00000140451  | feature_id[20].value > threshold=8.110000133514404   |
| node_92: feature_name=ENSG00000105173  | feature_id[67].value <= threshold=98.07999801635742  |
| node_93: feature_name=ENSG00000170312  | feature_id[0].value > threshold=160.83999633789062   |
| node_99: feature_name=ENSG00000070950  | feature_id[108].value <= threshold=74.7750015258789  |
| node_100: feature_name=ENSG00000175130 | feature_id[152].value <= threshold=103.5099983215332 |
| node_101: feature_name=ENSG00000117724 | feature_id[111].value > threshold=42.60000038146973  |
| node_115: feature_name=ENSG00000197061 | feature_id[22].value > threshold=144.55500030517578  |

|                                        |                                                      |
|----------------------------------------|------------------------------------------------------|
| node_125: feature_name=ENSG00000122952 | feature_id[57].value <= threshold=716.2649841308594  |
| node_126: feature_name=ENSG00000198033 | feature_id[149].value <= threshold=456.3699951171875 |
| node_127: feature_name=ENSG00000178074 | feature_id[96].value <= threshold=38.650001525878906 |
| node_128: feature_name=ENSG00000006327 | feature_id[95].value > threshold=560.8050231933594   |
| Class: S                               |                                                      |
| Rules_51                               | passed counts: 1                                     |
| node_0: feature_name=ENSG00000170312   | feature_id[0].value > threshold=120.56500244140625   |
| node_34: feature_name=ENSG00000140451  | feature_id[20].value > threshold=8.110000133514404   |
| node_92: feature_name=ENSG00000105173  | feature_id[67].value <= threshold=98.07999801635742  |
| node_93: feature_name=ENSG00000170312  | feature_id[0].value > threshold=160.83999633789062   |
| node_99: feature_name=ENSG00000070950  | feature_id[108].value <= threshold=74.7750015258789  |
| node_100: feature_name=ENSG00000175130 | feature_id[152].value <= threshold=103.5099983215332 |
| node_101: feature_name=ENSG00000117724 | feature_id[111].value > threshold=42.60000038146973  |
| node_115: feature_name=ENSG00000197061 | feature_id[22].value > threshold=144.55500030517578  |
| node_125: feature_name=ENSG00000122952 | feature_id[57].value <= threshold=716.2649841308594  |
| node_126: feature_name=ENSG00000198033 | feature_id[149].value <= threshold=456.3699951171875 |
| node_127: feature_name=ENSG00000178074 | feature_id[96].value <= threshold=38.650001525878906 |
| node_128: feature_name=ENSG00000006327 | feature_id[95].value <= threshold=560.8050231933594  |
| node_129: feature_name=ENSG00000175305 | feature_id[49].value > threshold=23.119999885559082  |
| node_131: feature_name=ENSG00000115163 | feature_id[117].value > threshold=62.974998474121094 |
| Class: G2M                             |                                                      |
| Rules_52                               | passed counts: 1                                     |
| node_0: feature_name=ENSG00000170312   | feature_id[0].value > threshold=120.56500244140625   |

|                                        |                                                       |
|----------------------------------------|-------------------------------------------------------|
| node_34: feature_name=ENSG00000140451  | feature_id[20].value > threshold=8.110000133514404    |
| node_92: feature_name=ENSG00000105173  | feature_id[67].value <= threshold=98.07999801635742   |
| node_93: feature_name=ENSG00000170312  | feature_id[0].value > threshold=160.83999633789062    |
| node_99: feature_name=ENSG00000070950  | feature_id[108].value <= threshold=74.7750015258789   |
| node_100: feature_name=ENSG00000175130 | feature_id[152].value <= threshold=103.5099983215332  |
| node_101: feature_name=ENSG00000117724 | feature_id[111].value > threshold=42.60000038146973   |
| node_115: feature_name=ENSG00000197061 | feature_id[22].value > threshold=144.55500030517578   |
| node_125: feature_name=ENSG00000122952 | feature_id[57].value <= threshold=716.2649841308594   |
| node_126: feature_name=ENSG00000198033 | feature_id[149].value <= threshold=456.3699951171875  |
| node_127: feature_name=ENSG00000178074 | feature_id[96].value <= threshold=38.650001525878906  |
| node_128: feature_name=ENSG00000006327 | feature_id[95].value <= threshold=560.8050231933594   |
| node_129: feature_name=ENSG00000175305 | feature_id[49].value > threshold=23.119999885559082   |
| node_131: feature_name=ENSG00000115163 | feature_id[117].value <= threshold=62.974998474121094 |
| Class: S                               |                                                       |
|                                        |                                                       |
| Rules_53                               | passed counts:1                                       |
| node_0: feature_name=ENSG00000170312   | feature_id[0].value > threshold=120.56500244140625    |
| node_34: feature_name=ENSG00000140451  | feature_id[20].value > threshold=8.110000133514404    |
| node_92: feature_name=ENSG00000105173  | feature_id[67].value <= threshold=98.07999801635742   |
| node_93: feature_name=ENSG00000170312  | feature_id[0].value > threshold=160.83999633789062    |
| node_99: feature_name=ENSG00000070950  | feature_id[108].value <= threshold=74.7750015258789   |
| node_100: feature_name=ENSG00000175130 | feature_id[152].value <= threshold=103.5099983215332  |
| node_101: feature_name=ENSG00000117724 | feature_id[111].value > threshold=42.60000038146973   |
| node_115: feature_name=ENSG00000197061 | feature_id[22].value <= threshold=144.55500030517578  |
| node_116: feature_name=ENSG00000235571 | feature_id[119].value <= threshold=12.9350004196167   |

|                                        |                                                      |
|----------------------------------------|------------------------------------------------------|
| node_117: feature_name=ENSG00000112118 | feature_id[11].value <= threshold=30.804999351501465 |
| node_118: feature_name=ENSG00000229089 | feature_id[37].value > threshold=6.789999961853027   |
| Class: S                               |                                                      |
|                                        |                                                      |
| Rules_54                               | passed counts:1                                      |
| node_0: feature_name=ENSG00000170312   | feature_id[0].value > threshold=120.56500244140625   |
| node_34: feature_name=ENSG00000140451  | feature_id[20].value > threshold=8.110000133514404   |
| node_92: feature_name=ENSG00000105173  | feature_id[67].value <= threshold=98.07999801635742  |
| node_93: feature_name=ENSG00000170312  | feature_id[0].value > threshold=160.83999633789062   |
| node_99: feature_name=ENSG00000070950  | feature_id[108].value <= threshold=74.7750015258789  |
| node_100: feature_name=ENSG00000175130 | feature_id[152].value <= threshold=103.5099983215332 |
| node_101: feature_name=ENSG00000117724 | feature_id[111].value > threshold=42.60000038146973  |
| node_115: feature_name=ENSG00000197061 | feature_id[22].value <= threshold=144.55500030517578 |
| node_116: feature_name=ENSG00000235571 | feature_id[119].value <= threshold=12.9350004196167  |
| node_117: feature_name=ENSG00000112118 | feature_id[11].value <= threshold=30.804999351501465 |
| node_118: feature_name=ENSG00000229089 | feature_id[37].value <= threshold=6.789999961853027  |
| Class: G1                              |                                                      |
|                                        |                                                      |
| Rules_55                               | passed counts:1                                      |
| node_0: feature_name=ENSG00000170312   | feature_id[0].value > threshold=120.56500244140625   |
| node_34: feature_name=ENSG00000140451  | feature_id[20].value > threshold=8.110000133514404   |
| node_92: feature_name=ENSG00000105173  | feature_id[67].value <= threshold=98.07999801635742  |
| node_93: feature_name=ENSG00000170312  | feature_id[0].value > threshold=160.83999633789062   |
| node_99: feature_name=ENSG00000070950  | feature_id[108].value <= threshold=74.7750015258789  |
| node_100: feature_name=ENSG00000175130 | feature_id[152].value <= threshold=103.5099983215332 |



|                                        |                                                       |
|----------------------------------------|-------------------------------------------------------|
| node_101: feature_name=ENSG00000117724 | feature_id[111].value <= threshold=42.60000038146973  |
| node_102: feature_name=ENSG00000128951 | feature_id[123].value <= threshold=160.25             |
| node_103: feature_name=ENSG00000105011 | feature_id[31].value > threshold=61.09000015258789    |
| node_109: feature_name=ENSG00000136982 | feature_id[112].value <= threshold=17.335000038146973 |
| Class: G2M                             |                                                       |
| Rules_56                               | passed counts: 1                                      |
| node_0: feature_name=ENSG00000170312   | feature_id[0].value > threshold=120.56500244140625    |
| node_34: feature_name=ENSG00000140451  | feature_id[20].value > threshold=8.110000133514404    |
| node_92: feature_name=ENSG00000105173  | feature_id[67].value <= threshold=98.07999801635742   |
| node_93: feature_name=ENSG00000170312  | feature_id[0].value > threshold=160.83999633789062    |
| node_99: feature_name=ENSG00000070950  | feature_id[108].value <= threshold=74.7750015258789   |
| node_100: feature_name=ENSG00000175130 | feature_id[152].value <= threshold=103.5099983215332  |
| node_101: feature_name=ENSG00000117724 | feature_id[111].value <= threshold=42.60000038146973  |
| node_102: feature_name=ENSG00000128951 | feature_id[123].value <= threshold=160.25             |
| node_103: feature_name=ENSG00000105011 | feature_id[31].value <= threshold=61.09000015258789   |
| node_104: feature_name=ENSG00000163808 | feature_id[89].value <= threshold=9.610000133514404   |
| node_105: feature_name=ENSG00000123975 | feature_id[90].value > threshold=1455.4949951171875   |
| Class: S                               |                                                       |
| Rules_57                               | passed counts: 1                                      |
| node_0: feature_name=ENSG00000170312   | feature_id[0].value > threshold=120.56500244140625    |
| node_34: feature_name=ENSG00000140451  | feature_id[20].value > threshold=8.110000133514404    |
| node_92: feature_name=ENSG00000105173  | feature_id[67].value <= threshold=98.07999801635742   |
| node_93: feature_name=ENSG00000170312  | feature_id[0].value <= threshold=160.83999633789062   |

|                                       |                                                      |
|---------------------------------------|------------------------------------------------------|
| node_94: feature_name=ENSG00000182481 | feature_id[35].value <= threshold=678.3799743652344  |
| node_95: feature_name=ENSG00000103995 | feature_id[132].value <= threshold=9.0               |
| Class: G2M                            |                                                      |
|                                       |                                                      |
| Rules_58                              | passed counts: 1                                     |
| node_0: feature_name=ENSG00000170312  | feature_id[0].value > threshold=120.56500244140625   |
| node_34: feature_name=ENSG00000140451 | feature_id[20].value <= threshold=8.110000133514404  |
| node_35: feature_name=ENSG00000100297 | feature_id[54].value > threshold=111.95999908447266  |
| node_57: feature_name=ENSG00000197061 | feature_id[22].value > threshold=468.4400177001953   |
| node_61: feature_name=ENSG00000012048 | feature_id[36].value > threshold=23.5600004196167    |
| node_73: feature_name=ENSG00000229089 | feature_id[37].value <= threshold=106.125            |
| node_74: feature_name=ENSG00000182481 | feature_id[35].value > threshold=505.8800048828125   |
| node_84: feature_name=ENSG00000146278 | feature_id[64].value <= threshold=0.7649999856948853 |
| node_85: feature_name=ENSG00000025770 | feature_id[131].value <= threshold=91.17000198364258 |
| node_86: feature_name=ENSG00000229089 | feature_id[37].value <= threshold=18.195000171661377 |
| Class: G1                             |                                                      |
|                                       |                                                      |
| Rules_59                              | passed counts: 1                                     |
| node_0: feature_name=ENSG00000170312  | feature_id[0].value > threshold=120.56500244140625   |
| node_34: feature_name=ENSG00000140451 | feature_id[20].value <= threshold=8.110000133514404  |
| node_35: feature_name=ENSG00000100297 | feature_id[54].value > threshold=111.95999908447266  |
| node_57: feature_name=ENSG00000197061 | feature_id[22].value > threshold=468.4400177001953   |
| node_61: feature_name=ENSG00000012048 | feature_id[36].value > threshold=23.5600004196167    |
| node_73: feature_name=ENSG00000229089 | feature_id[37].value <= threshold=106.125            |
| node_74: feature_name=ENSG00000182481 | feature_id[35].value <= threshold=505.8800048828125  |

|                                       |                                                      |
|---------------------------------------|------------------------------------------------------|
| node_75: feature_name=ENSG00000088325 | feature_id[143].value > threshold=14.054999828338623 |
| node_77: feature_name=ENSG00000088986 | feature_id[83].value > threshold=1100.9449768066406  |
| Class: G2M                            |                                                      |
|                                       |                                                      |
| Rules_60                              | passed counts:1                                      |
| node_0: feature_name=ENSG00000170312  | feature_id[0].value > threshold=120.56500244140625   |
| node_34: feature_name=ENSG00000140451 | feature_id[20].value <= threshold=8.110000133514404  |
| node_35: feature_name=ENSG00000100297 | feature_id[54].value > threshold=111.95999908447266  |
| node_57: feature_name=ENSG00000197061 | feature_id[22].value > threshold=468.4400177001953   |
| node_61: feature_name=ENSG00000012048 | feature_id[36].value > threshold=23.5600004196167    |
| node_73: feature_name=ENSG00000229089 | feature_id[37].value <= threshold=106.125            |
| node_74: feature_name=ENSG00000182481 | feature_id[35].value <= threshold=505.8800048828125  |
| node_75: feature_name=ENSG00000088325 | feature_id[143].value > threshold=14.054999828338623 |
| node_77: feature_name=ENSG00000088986 | feature_id[83].value <= threshold=1100.9449768066406 |
| node_78: feature_name=ENSG00000154473 | feature_id[156].value <= threshold=64.73999786376953 |
| node_79: feature_name=ENSG00000198763 | feature_id[127].value > threshold=3568.635009765625  |
| Class: G2M                            |                                                      |
|                                       |                                                      |
| Rules_61                              | passed counts:1                                      |
| node_0: feature_name=ENSG00000170312  | feature_id[0].value > threshold=120.56500244140625   |
| node_34: feature_name=ENSG00000140451 | feature_id[20].value <= threshold=8.110000133514404  |
| node_35: feature_name=ENSG00000100297 | feature_id[54].value > threshold=111.95999908447266  |
| node_57: feature_name=ENSG00000197061 | feature_id[22].value > threshold=468.4400177001953   |
| node_61: feature_name=ENSG00000012048 | feature_id[36].value > threshold=23.5600004196167    |
| node_73: feature_name=ENSG00000229089 | feature_id[37].value <= threshold=106.125            |

|                                       |                                                       |
|---------------------------------------|-------------------------------------------------------|
| node_74: feature_name=ENSG00000182481 | feature_id[35].value <= threshold=505.8800048828125   |
| node_75: feature_name=ENSG00000088325 | feature_id[143].value > threshold=14.054999828338623  |
| node_77: feature_name=ENSG00000088986 | feature_id[83].value <= threshold=1100.9449768066406  |
| node_78: feature_name=ENSG00000154473 | feature_id[156].value <= threshold=64.73999786376953  |
| node_79: feature_name=ENSG00000198763 | feature_id[127].value <= threshold=3568.635009765625  |
| Class: S                              |                                                       |
| Rules_62                              | passed counts:1                                       |
| node_0: feature_name=ENSG00000170312  | feature_id[0].value > threshold=120.56500244140625    |
| node_34: feature_name=ENSG00000140451 | feature_id[20].value <= threshold=8.110000133514404   |
| node_35: feature_name=ENSG00000100297 | feature_id[54].value > threshold=111.95999908447266   |
| node_57: feature_name=ENSG00000197061 | feature_id[22].value > threshold=468.4400177001953    |
| node_61: feature_name=ENSG00000012048 | feature_id[36].value > threshold=23.5600004196167     |
| node_73: feature_name=ENSG00000229089 | feature_id[37].value <= threshold=106.125             |
| node_74: feature_name=ENSG00000182481 | feature_id[35].value <= threshold=505.8800048828125   |
| node_75: feature_name=ENSG00000088325 | feature_id[143].value <= threshold=14.054999828338623 |
| Class: G1                             |                                                       |
| Rules_63                              | passed counts:1                                       |
| node_0: feature_name=ENSG00000170312  | feature_id[0].value > threshold=120.56500244140625    |
| node_34: feature_name=ENSG00000140451 | feature_id[20].value <= threshold=8.110000133514404   |
| node_35: feature_name=ENSG00000100297 | feature_id[54].value > threshold=111.95999908447266   |
| node_57: feature_name=ENSG00000197061 | feature_id[22].value > threshold=468.4400177001953    |
| node_61: feature_name=ENSG00000012048 | feature_id[36].value <= threshold=23.5600004196167    |
| node_62: feature_name=ENSG00000135451 | feature_id[43].value > threshold=42.31999969482422    |

|                                       |                                                      |
|---------------------------------------|------------------------------------------------------|
| node_66: feature_name=ENSG0000013573  | feature_id[92].value <= threshold=54.625             |
| node_67: feature_name=ENSG00000171793 | feature_id[58].value > threshold=282.51499938964844  |
| node_69: feature_name=ENSG00000152253 | feature_id[140].value > threshold=84.25500106811523  |
| Class: G2M                            |                                                      |
|                                       |                                                      |
| Rules_64                              | passed counts: 1                                     |
| node_0: feature_name=ENSG00000170312  | feature_id[0].value > threshold=120.56500244140625   |
| node_34: feature_name=ENSG00000140451 | feature_id[20].value <= threshold=8.110000133514404  |
| node_35: feature_name=ENSG00000100297 | feature_id[54].value <= threshold=111.95999908447266 |
| node_36: feature_name=ENSG00000102384 | feature_id[28].value > threshold=15.289999961853027  |
| node_46: feature_name=ENSG00000169242 | feature_id[155].value <= threshold=16.90499973297119 |
| node_47: feature_name=ENSG00000156802 | feature_id[18].value > threshold=32.334999084472656  |
| node_51: feature_name=ENSG00000276368 | feature_id[46].value <= threshold=156.26000213623047 |
| node_52: feature_name=ENSG00000175063 | feature_id[9].value <= threshold=250.1449966430664   |
| Class: G2M                            |                                                      |
|                                       |                                                      |
| Rules_65                              | passed counts: 1                                     |
| node_0: feature_name=ENSG00000170312  | feature_id[0].value > threshold=120.56500244140625   |
| node_34: feature_name=ENSG00000140451 | feature_id[20].value <= threshold=8.110000133514404  |
| node_35: feature_name=ENSG00000100297 | feature_id[54].value <= threshold=111.95999908447266 |
| node_36: feature_name=ENSG00000102384 | feature_id[28].value > threshold=15.289999961853027  |
| node_46: feature_name=ENSG00000169242 | feature_id[155].value <= threshold=16.90499973297119 |
| node_47: feature_name=ENSG00000156802 | feature_id[18].value <= threshold=32.334999084472656 |
| node_48: feature_name=ENSG00000175573 | feature_id[145].value > threshold=92.84999656677246  |
| Class: G2M                            |                                                      |

|                                       |                                                       |
|---------------------------------------|-------------------------------------------------------|
| Rules_66                              | passed counts:1                                       |
| node_0: feature_name=ENSG00000170312  | feature_id[0].value > threshold=120.56500244140625    |
| node_34: feature_name=ENSG00000140451 | feature_id[20].value <= threshold=8.110000133514404   |
| node_35: feature_name=ENSG00000100297 | feature_id[54].value <= threshold=111.95999908447266  |
| node_36: feature_name=ENSG00000102384 | feature_id[28].value <= threshold=15.289999961853027  |
| node_37: feature_name=ENSG00000123473 | feature_id[51].value <= threshold=74.30500030517578   |
| node_38: feature_name=ENSG00000102362 | feature_id[136].value <= threshold=11.420000076293945 |
| node_39: feature_name=ENSG00000205352 | feature_id[100].value > threshold=243.77000427246094  |
| Class: S                              |                                                       |
| Rules_67                              | passed counts:1                                       |
| node_0: feature_name=ENSG00000170312  | feature_id[0].value > threshold=120.56500244140625    |
| node_34: feature_name=ENSG00000140451 | feature_id[20].value <= threshold=8.110000133514404   |
| node_35: feature_name=ENSG00000100297 | feature_id[54].value <= threshold=111.95999908447266  |
| node_36: feature_name=ENSG00000102384 | feature_id[28].value <= threshold=15.289999961853027  |
| node_37: feature_name=ENSG00000123473 | feature_id[51].value <= threshold=74.30500030517578   |
| node_38: feature_name=ENSG00000102362 | feature_id[136].value <= threshold=11.420000076293945 |
| node_39: feature_name=ENSG00000205352 | feature_id[100].value <= threshold=243.77000427246094 |
| node_40: feature_name=ENSG00000031691 | feature_id[76].value > threshold=47.04499912261963    |
| Class: S                              |                                                       |
| Rules_68                              | passed counts:1                                       |
| node_0: feature_name=ENSG00000170312  | feature_id[0].value <= threshold=120.56500244140625   |
| node_1: feature_name=ENSG00000197061  | feature_id[22].value <= threshold=794.760009765625    |

|                                       |                                                      |
|---------------------------------------|------------------------------------------------------|
| node_2: feature_name=ENSG00000091164  | feature_id[113].value > threshold=29.735000610351562 |
| node_10: feature_name=ENSG00000093009 | feature_id[19].value <= threshold=198.45000457763672 |
| node_11: feature_name=ENSG00000167553 | feature_id[135].value > threshold=88.50500106811523  |
| node_13: feature_name=ENSG00000025770 | feature_id[131].value > threshold=154.4499969482422  |
| node_23: feature_name=ENSG00000101104 | feature_id[40].value > threshold=13.899999618530273  |
| node_25: feature_name=ENSG00000121716 | feature_id[47].value > threshold=54.21500015258789   |
| Class: G2M                            |                                                      |
|                                       |                                                      |
| Rules_69                              | passed counts: 1                                     |
| node_0: feature_name=ENSG00000170312  | feature_id[0].value <= threshold=120.56500244140625  |
| node_1: feature_name=ENSG00000197061  | feature_id[22].value <= threshold=794.760009765625   |
| node_2: feature_name=ENSG00000091164  | feature_id[113].value > threshold=29.735000610351562 |
| node_10: feature_name=ENSG00000093009 | feature_id[19].value <= threshold=198.45000457763672 |
| node_11: feature_name=ENSG00000167553 | feature_id[135].value > threshold=88.50500106811523  |
| node_13: feature_name=ENSG00000025770 | feature_id[131].value > threshold=154.4499969482422  |
| node_23: feature_name=ENSG00000101104 | feature_id[40].value > threshold=13.899999618530273  |
| node_25: feature_name=ENSG00000121716 | feature_id[47].value <= threshold=54.21500015258789  |
| Class: S                              |                                                      |
|                                       |                                                      |
| Rules_70                              | passed counts: 1                                     |
| node_0: feature_name=ENSG00000170312  | feature_id[0].value <= threshold=120.56500244140625  |
| node_1: feature_name=ENSG00000197061  | feature_id[22].value <= threshold=794.760009765625   |
| node_2: feature_name=ENSG00000091164  | feature_id[113].value > threshold=29.735000610351562 |
| node_10: feature_name=ENSG00000093009 | feature_id[19].value <= threshold=198.45000457763672 |
| node_11: feature_name=ENSG00000167553 | feature_id[135].value > threshold=88.50500106811523  |

|                                       |                                                       |
|---------------------------------------|-------------------------------------------------------|
| node_13: feature_name=ENSG00000025770 | feature_id[131].value > threshold=154.4499969482422   |
| node_23: feature_name=ENSG00000101104 | feature_id[40].value <= threshold=13.899999618530273  |
| Class: G1                             |                                                       |
|                                       |                                                       |
| Rules_71                              | passed counts:1                                       |
| node_0: feature_name=ENSG00000170312  | feature_id[0].value <= threshold=120.56500244140625   |
| node_1: feature_name=ENSG00000197061  | feature_id[22].value <= threshold=794.760009765625    |
| node_2: feature_name=ENSG00000091164  | feature_id[113].value > threshold=29.735000610351562  |
| node_10: feature_name=ENSG00000093009 | feature_id[19].value <= threshold=198.45000457763672  |
| node_11: feature_name=ENSG00000167553 | feature_id[135].value > threshold=88.50500106811523   |
| node_13: feature_name=ENSG00000025770 | feature_id[131].value <= threshold=154.4499969482422  |
| node_14: feature_name=ENSG00000007968 | feature_id[80].value > threshold=20.079999923706055   |
| node_20: feature_name=ENSG00000198033 | feature_id[149].value > threshold=300.86499786376953  |
| Class: G1                             |                                                       |
|                                       |                                                       |
| Rules_72                              | passed counts:1                                       |
| node_0: feature_name=ENSG00000170312  | feature_id[0].value <= threshold=120.56500244140625   |
| node_1: feature_name=ENSG00000197061  | feature_id[22].value <= threshold=794.760009765625    |
| node_2: feature_name=ENSG00000091164  | feature_id[113].value > threshold=29.735000610351562  |
| node_10: feature_name=ENSG00000093009 | feature_id[19].value <= threshold=198.45000457763672  |
| node_11: feature_name=ENSG00000167553 | feature_id[135].value > threshold=88.50500106811523   |
| node_13: feature_name=ENSG00000025770 | feature_id[131].value <= threshold=154.4499969482422  |
| node_14: feature_name=ENSG00000007968 | feature_id[80].value > threshold=20.079999923706055   |
| node_20: feature_name=ENSG00000198033 | feature_id[149].value <= threshold=300.86499786376953 |
| Class: S                              |                                                       |



|                                       |                                                       |
|---------------------------------------|-------------------------------------------------------|
| Rules_73                              | passed counts: 1                                      |
| node_0: feature_name=ENSG00000170312  | feature_id[0].value <= threshold=120.56500244140625   |
| node_1: feature_name=ENSG00000197061  | feature_id[22].value <= threshold=794.760009765625    |
| node_2: feature_name=ENSG00000091164  | feature_id[113].value > threshold=29.735000610351562  |
| node_10: feature_name=ENSG00000093009 | feature_id[19].value <= threshold=198.45000457763672  |
| node_11: feature_name=ENSG00000167553 | feature_id[135].value > threshold=88.50500106811523   |
| node_13: feature_name=ENSG00000025770 | feature_id[131].value <= threshold=154.4499969482422  |
| node_14: feature_name=ENSG00000007968 | feature_id[80].value <= threshold=20.079999923706055  |
| node_15: feature_name=ENSG00000105355 | feature_id[116].value <= threshold=24.335000038146973 |
| node_16: feature_name=ENSG00000178999 | feature_id[12].value > threshold=10.694999694824219   |
| Class: S                              |                                                       |
| Rules_74                              | passed counts: 1                                      |
| node_0: feature_name=ENSG00000170312  | feature_id[0].value <= threshold=120.56500244140625   |
| node_1: feature_name=ENSG00000197061  | feature_id[22].value <= threshold=794.760009765625    |
| node_2: feature_name=ENSG00000091164  | feature_id[113].value > threshold=29.735000610351562  |
| node_10: feature_name=ENSG00000093009 | feature_id[19].value <= threshold=198.45000457763672  |
| node_11: feature_name=ENSG00000167553 | feature_id[135].value <= threshold=88.50500106811523  |
| Class: S                              |                                                       |
| Rules_75                              | passed counts: 1                                      |
| node_0: feature_name=ENSG00000170312  | feature_id[0].value <= threshold=120.56500244140625   |
| node_1: feature_name=ENSG00000197061  | feature_id[22].value <= threshold=794.760009765625    |
| node_2: feature_name=ENSG00000091164  | feature_id[113].value <= threshold=29.735000610351562 |

|                                      |                                                      |
|--------------------------------------|------------------------------------------------------|
| node_3: feature_name=ENSG00000137310 | feature_id[71].value <= threshold=4.164999961853027  |
| node_4: feature_name=ENSG00000196230 | feature_id[61].value <= threshold=1130.8150024414062 |
| node_5: feature_name=ENSG00000100097 | feature_id[68].value > threshold=13833.3251953125    |
| Class: G1                            |                                                      |

(2) Rules on features selected by MCFS

|                                       |                                                       |
|---------------------------------------|-------------------------------------------------------|
| Rules_0                               | passed counts:317                                     |
| node_0: feature_name=ENSG00000170312  | feature_id[0].value <= threshold=120.56500244140625   |
| node_1: feature_name=ENSG00000197061  | feature_id[2].value <= threshold=794.760009765625     |
| node_2: feature_name=ENSG00000091164  | feature_id[188].value > threshold=29.735000610351562  |
| node_10: feature_name=ENSG00000093009 | feature_id[59].value <= threshold=198.45000457763672  |
| node_11: feature_name=ENSG00000154640 | feature_id[353].value <= threshold=326.40999603271484 |
| node_12: feature_name=ENSG00000106462 | feature_id[284].value <= threshold=37.8650016784668   |
| node_13: feature_name=ENSG00000138376 | feature_id[137].value <= threshold=85.30999755859375  |
| node_14: feature_name=ENSG00000173207 | feature_id[26].value <= threshold=800.375             |
| node_15: feature_name=ENSG00000232388 | feature_id[360].value <= threshold=253.9800033569336  |
| Class: G1                             |                                                       |
| Rules_1                               | passed counts:239                                     |
| node_0: feature_name=ENSG00000170312  | feature_id[0].value > threshold=120.56500244140625    |
| node_32: feature_name=ENSG00000140451 | feature_id[10].value > threshold=8.110000133514404    |
| node_80: feature_name=ENSG00000105173 | feature_id[48].value <= threshold=98.07999801635742   |
| node_81: feature_name=ENSG00000170312 | feature_id[0].value > threshold=160.83999633789062    |
| node_87: feature_name=ENSG00000167978 | feature_id[187].value > threshold=37.79999923706055   |
| node_93: feature_name=ENSG00000137135 | feature_id[199].value > threshold=1.699999988079071   |

|                                        |                                                       |
|----------------------------------------|-------------------------------------------------------|
| node_97: feature_name=ENSG00000130429  | feature_id[361].value <= threshold=323.2150115966797  |
| node_98: feature_name=ENSG00000116717  | feature_id[135].value > threshold=13.164999961853027  |
| node_100: feature_name=ENSG00000117724 | feature_id[94].value > threshold=42.60000038146973    |
| node_114: feature_name=ENSG00000145604 | feature_id[390].value <= threshold=104.21000289916992 |
| node_115: feature_name=ENSG00000183741 | feature_id[331].value <= threshold=45.329999923706055 |
| node_116: feature_name=ENSG00000122565 | feature_id[346].value <= threshold=237.02999877929688 |
| Class: G2M                             |                                                       |
|                                        |                                                       |
| Rules_2                                | passed counts:205                                     |
| node_0: feature_name=ENSG00000170312   | feature_id[0].value > threshold=120.56500244140625    |
| node_32: feature_name=ENSG00000140451  | feature_id[10].value <= threshold=8.110000133514404   |
| node_33: feature_name=ENSG00000100297  | feature_id[51].value > threshold=111.95999908447266   |
| node_51: feature_name=ENSG00000197061  | feature_id[2].value > threshold=468.4400177001953     |
| node_55: feature_name=ENSG0000012048   | feature_id[99].value > threshold=23.5600004196167     |
| node_63: feature_name=ENSG00000127564  | feature_id[107].value > threshold=22.22499942779541   |
| node_67: feature_name=ENSG00000167601  | feature_id[242].value <= threshold=391.2899932861328  |
| node_68: feature_name=ENSG00000259848  | feature_id[68].value <= threshold=239.00499725341797  |
| node_69: feature_name=ENSG00000117650  | feature_id[84].value <= threshold=76.625              |
| node_70: feature_name=ENSG00000185361  | feature_id[58].value <= threshold=12.335000038146973  |
| node_71: feature_name=ENSG00000121152  | feature_id[33].value <= threshold=224.78500366210938  |
| node_72: feature_name=ENSG00000151503  | feature_id[451].value > threshold=0.26499998569488525 |
| Class: S                               |                                                       |
|                                        |                                                       |
| Rules_3                                | passed counts:45                                      |
| node_0: feature_name=ENSG00000170312   | feature_id[0].value > threshold=120.56500244140625    |

|                                        |                                                       |
|----------------------------------------|-------------------------------------------------------|
| node_32: feature_name=ENSG00000140451  | feature_id[10].value > threshold=8.110000133514404    |
| node_80: feature_name=ENSG00000105173  | feature_id[48].value <= threshold=98.07999801635742   |
| node_81: feature_name=ENSG00000170312  | feature_id[0].value > threshold=160.83999633789062    |
| node_87: feature_name=ENSG00000167978  | feature_id[187].value > threshold=37.79999923706055   |
| node_93: feature_name=ENSG00000137135  | feature_id[199].value > threshold=1.699999988079071   |
| node_97: feature_name=ENSG00000130429  | feature_id[361].value <= threshold=323.2150115966797  |
| node_98: feature_name=ENSG00000116717  | feature_id[135].value > threshold=13.164999961853027  |
| node_100: feature_name=ENSG00000117724 | feature_id[94].value <= threshold=42.60000038146973   |
| node_101: feature_name=ENSG00000101003 | feature_id[339].value <= threshold=18.390000343322754 |
| node_102: feature_name=ENSG00000278259 | feature_id[436].value <= threshold=66.98500061035156  |
| node_103: feature_name=ENSG00000237649 | feature_id[104].value > threshold=2.6549999713897705  |
| node_107: feature_name=ENSG00000183726 | feature_id[461].value > threshold=36.849998474121094  |
| Class: G2M                             |                                                       |
|                                        |                                                       |
| Rules_4                                | passed counts:37                                      |
| node_0: feature_name=ENSG00000170312   | feature_id[0].value > threshold=120.56500244140625    |
| node_32: feature_name=ENSG00000140451  | feature_id[10].value <= threshold=8.110000133514404   |
| node_33: feature_name=ENSG00000100297  | feature_id[51].value <= threshold=111.95999908447266  |
| node_34: feature_name=ENSG00000150991  | feature_id[194].value <= threshold=998.7099914550781  |
| node_35: feature_name=ENSG00000175305  | feature_id[38].value <= threshold=14.080000400543213  |
| node_36: feature_name=ENSG00000127483  | feature_id[191].value <= threshold=215.8800048828125  |
| node_37: feature_name=ENSG00000171793  | feature_id[183].value <= threshold=335.6300048828125  |
| node_38: feature_name=ENSG00000130429  | feature_id[361].value <= threshold=291.3249969482422  |
| Class: G2M                             |                                                       |
|                                        |                                                       |

|                                        |                                                      |
|----------------------------------------|------------------------------------------------------|
| Rules_5                                | passed counts:20                                     |
| node_0: feature_name=ENSG00000170312   | feature_id[0].value > threshold=120.56500244140625   |
| node_32: feature_name=ENSG00000140451  | feature_id[10].value > threshold=8.110000133514404   |
| node_80: feature_name=ENSG00000105173  | feature_id[48].value > threshold=98.07999801635742   |
| node_128: feature_name=ENSG00000173207 | feature_id[26].value <= threshold=529.4750061035156  |
| node_129: feature_name=ENSG00000112118 | feature_id[49].value > threshold=74.27000045776367   |
| Class: S                               |                                                      |
|                                        |                                                      |
| Rules_6                                | passed counts:17                                     |
| node_0: feature_name=ENSG00000170312   | feature_id[0].value > threshold=120.56500244140625   |
| node_32: feature_name=ENSG00000140451  | feature_id[10].value <= threshold=8.110000133514404  |
| node_33: feature_name=ENSG00000100297  | feature_id[51].value <= threshold=111.95999908447266 |
| node_34: feature_name=ENSG00000150991  | feature_id[194].value > threshold=998.7099914550781  |
| node_48: feature_name=ENSG00000205352  | feature_id[211].value > threshold=73.43000030517578  |
| Class: S                               |                                                      |
|                                        |                                                      |
| Rules_7                                | passed counts:15                                     |
| node_0: feature_name=ENSG00000170312   | feature_id[0].value > threshold=120.56500244140625   |
| node_32: feature_name=ENSG00000140451  | feature_id[10].value > threshold=8.110000133514404   |
| node_80: feature_name=ENSG00000105173  | feature_id[48].value > threshold=98.07999801635742   |
| node_128: feature_name=ENSG00000173207 | feature_id[26].value > threshold=529.4750061035156   |
| node_134: feature_name=ENSG00000106367 | feature_id[195].value > threshold=167.65499877929688 |
| Class: G2M                             |                                                      |
|                                        |                                                      |
| Rules_8                                | passed counts:13                                     |

|                                       |                                                       |
|---------------------------------------|-------------------------------------------------------|
| node_0: feature_name=ENSG00000170312  | feature_id[0].value <= threshold=120.56500244140625   |
| node_1: feature_name=ENSG00000197061  | feature_id[2].value > threshold=794.760009765625      |
| node_27: feature_name=ENSG00000168476 | feature_id[217].value <= threshold=39.849998474121094 |
| node_28: feature_name=ENSG00000034510 | feature_id[424].value <= threshold=9527.485107421875  |
| Class: S                              |                                                       |
| Rules_9                               | passed counts:12                                      |
| node_0: feature_name=ENSG00000170312  | feature_id[0].value > threshold=120.56500244140625    |
| node_32: feature_name=ENSG00000140451 | feature_id[10].value <= threshold=8.110000133514404   |
| node_33: feature_name=ENSG00000100297 | feature_id[51].value > threshold=111.95999908447266   |
| node_51: feature_name=ENSG00000197061 | feature_id[2].value > threshold=468.4400177001953     |
| node_55: feature_name=ENSG00000012048 | feature_id[99].value <= threshold=23.5600004196167    |
| node_56: feature_name=ENSG00000135451 | feature_id[93].value > threshold=42.31999969482422    |
| node_60: feature_name=ENSG00000130429 | feature_id[361].value <= threshold=215.33999633789062 |
| Class: G2M                            |                                                       |
| Rules_10                              | passed counts:9                                       |
| node_0: feature_name=ENSG00000170312  | feature_id[0].value > threshold=120.56500244140625    |
| node_32: feature_name=ENSG00000140451 | feature_id[10].value <= threshold=8.110000133514404   |
| node_33: feature_name=ENSG00000100297 | feature_id[51].value <= threshold=111.95999908447266  |
| node_34: feature_name=ENSG00000150991 | feature_id[194].value <= threshold=998.7099914550781  |
| node_35: feature_name=ENSG00000175305 | feature_id[38].value > threshold=14.080000400543213   |
| node_45: feature_name=ENSG00000198554 | feature_id[457].value <= threshold=40.564998626708984 |
| Class: S                              |                                                       |

|                                        |                                                      |
|----------------------------------------|------------------------------------------------------|
| Rules_11                               | passed counts:8                                      |
| node_0: feature_name=ENSG00000170312   | feature_id[0].value > threshold=120.56500244140625   |
| node_32: feature_name=ENSG00000140451  | feature_id[10].value > threshold=8.110000133514404   |
| node_80: feature_name=ENSG00000105173  | feature_id[48].value <= threshold=98.07999801635742  |
| node_81: feature_name=ENSG00000170312  | feature_id[0].value > threshold=160.83999633789062   |
| node_87: feature_name=ENSG00000167978  | feature_id[187].value > threshold=37.79999923706055  |
| node_93: feature_name=ENSG00000137135  | feature_id[199].value > threshold=1.699999988079071  |
| node_97: feature_name=ENSG00000130429  | feature_id[361].value <= threshold=323.2150115966797 |
| node_98: feature_name=ENSG00000116717  | feature_id[135].value > threshold=13.164999961853027 |
| node_100: feature_name=ENSG00000117724 | feature_id[94].value <= threshold=42.60000038146973  |
| node_101: feature_name=ENSG00000101003 | feature_id[339].value > threshold=18.390000343322754 |
| node_111: feature_name=ENSG00000198331 | feature_id[61].value > threshold=33.454999923706055  |
| Class: S                               |                                                      |
|                                        |                                                      |
| Rules_12                               | passed counts:8                                      |
| node_0: feature_name=ENSG00000170312   | feature_id[0].value > threshold=120.56500244140625   |
| node_32: feature_name=ENSG00000140451  | feature_id[10].value <= threshold=8.110000133514404  |
| node_33: feature_name=ENSG00000100297  | feature_id[51].value > threshold=111.95999908447266  |
| node_51: feature_name=ENSG00000197061  | feature_id[2].value > threshold=468.4400177001953    |
| node_55: feature_name=ENSG00000012048  | feature_id[99].value <= threshold=23.5600004196167   |
| node_56: feature_name=ENSG00000135451  | feature_id[93].value <= threshold=42.31999969482422  |
| node_57: feature_name=ENSG00000165502  | feature_id[258].value <= threshold=488.7150115966797 |
| Class: S                               |                                                      |
|                                        |                                                      |
| Rules_13                               | passed counts:7                                      |

|                                        |                                                       |
|----------------------------------------|-------------------------------------------------------|
| node_0: feature_name=ENSG00000170312   | feature_id[0].value > threshold=120.56500244140625    |
| node_32: feature_name=ENSG00000140451  | feature_id[10].value <= threshold=8.110000133514404   |
| node_33: feature_name=ENSG00000100297  | feature_id[51].value > threshold=111.95999908447266   |
| node_51: feature_name=ENSG00000197061  | feature_id[2].value <= threshold=468.4400177001953    |
| node_52: feature_name=ENSG00000125885  | feature_id[136].value <= threshold=14.849999904632568 |
| Class: G1                              |                                                       |
|                                        |                                                       |
| Rules_14                               | passed counts:5                                       |
| node_0: feature_name=ENSG00000170312   | feature_id[0].value > threshold=120.56500244140625    |
| node_32: feature_name=ENSG00000140451  | feature_id[10].value > threshold=8.110000133514404    |
| node_80: feature_name=ENSG00000105173  | feature_id[48].value <= threshold=98.07999801635742   |
| node_81: feature_name=ENSG00000170312  | feature_id[0].value > threshold=160.83999633789062    |
| node_87: feature_name=ENSG00000167978  | feature_id[187].value > threshold=37.79999923706055   |
| node_93: feature_name=ENSG00000137135  | feature_id[199].value > threshold=1.69999988079071    |
| node_97: feature_name=ENSG00000130429  | feature_id[361].value > threshold=323.2150115966797   |
| node_125: feature_name=ENSG00000011426 | feature_id[309].value > threshold=152.47500610351562  |
| Class: S                               |                                                       |
|                                        |                                                       |
| Rules_15                               | passed counts:5                                       |
| node_0: feature_name=ENSG00000170312   | feature_id[0].value > threshold=120.56500244140625    |
| node_32: feature_name=ENSG00000140451  | feature_id[10].value > threshold=8.110000133514404    |
| node_80: feature_name=ENSG00000105173  | feature_id[48].value <= threshold=98.07999801635742   |
| node_81: feature_name=ENSG00000170312  | feature_id[0].value > threshold=160.83999633789062    |
| node_87: feature_name=ENSG00000167978  | feature_id[187].value > threshold=37.79999923706055   |
| node_93: feature_name=ENSG00000137135  | feature_id[199].value > threshold=1.69999988079071    |



|                                        |                                                      |
|----------------------------------------|------------------------------------------------------|
| node_97: feature_name=ENSG00000130429  | feature_id[361].value <= threshold=323.2150115966797 |
| node_98: feature_name=ENSG00000116717  | feature_id[135].value > threshold=13.164999961853027 |
| node_100: feature_name=ENSG00000117724 | feature_id[94].value > threshold=42.60000038146973   |
| node_114: feature_name=ENSG00000145604 | feature_id[390].value > threshold=104.21000289916992 |
| node_122: feature_name=ENSG00000134291 | feature_id[338].value <= threshold=582.6800231933594 |
| Class: G2M                             |                                                      |
| Rules_16                               | passed counts:5                                      |
| node_0: feature_name=ENSG00000170312   | feature_id[0].value > threshold=120.56500244140625   |
| node_32: feature_name=ENSG00000140451  | feature_id[10].value > threshold=8.110000133514404   |
| node_80: feature_name=ENSG00000105173  | feature_id[48].value <= threshold=98.07999801635742  |
| node_81: feature_name=ENSG00000170312  | feature_id[0].value > threshold=160.83999633789062   |
| node_87: feature_name=ENSG00000167978  | feature_id[187].value > threshold=37.79999923706055  |
| node_93: feature_name=ENSG00000137135  | feature_id[199].value <= threshold=1.699999988079071 |
| node_94: feature_name=ENSG00000089693  | feature_id[453].value <= threshold=316.0400085449219 |
| Class: S                               |                                                      |
| Rules_17                               | passed counts:5                                      |
| node_0: feature_name=ENSG00000170312   | feature_id[0].value > threshold=120.56500244140625   |
| node_32: feature_name=ENSG00000140451  | feature_id[10].value > threshold=8.110000133514404   |
| node_80: feature_name=ENSG00000105173  | feature_id[48].value <= threshold=98.07999801635742  |
| node_81: feature_name=ENSG00000170312  | feature_id[0].value > threshold=160.83999633789062   |
| node_87: feature_name=ENSG00000167978  | feature_id[187].value <= threshold=37.79999923706055 |
| node_88: feature_name=ENSG00000169490  | feature_id[354].value > threshold=62.83999824523926  |
| Class: S                               |                                                      |

|                                        |                                                      |
|----------------------------------------|------------------------------------------------------|
| Rules_18                               | passed counts:5                                      |
| node_0: feature_name=ENSG00000170312   | feature_id[0].value > threshold=120.56500244140625   |
| node_32: feature_name=ENSG00000140451  | feature_id[10].value > threshold=8.110000133514404   |
| node_80: feature_name=ENSG00000105173  | feature_id[48].value <= threshold=98.07999801635742  |
| node_81: feature_name=ENSG00000170312  | feature_id[0].value <= threshold=160.83999633789062  |
| node_82: feature_name=ENSG00000145604  | feature_id[390].value <= threshold=68.21500015258789 |
| Class: G1                              |                                                      |
| Rules_19                               | passed counts:5                                      |
| node_0: feature_name=ENSG00000170312   | feature_id[0].value > threshold=120.56500244140625   |
| node_32: feature_name=ENSG00000140451  | feature_id[10].value <= threshold=8.110000133514404  |
| node_33: feature_name=ENSG00000100297  | feature_id[51].value > threshold=111.95999908447266  |
| node_51: feature_name=ENSG00000197061  | feature_id[2].value > threshold=468.4400177001953    |
| node_55: feature_name=ENSG00000012048  | feature_id[99].value <= threshold=23.5600004196167   |
| node_56: feature_name=ENSG00000135451  | feature_id[93].value > threshold=42.31999969482422   |
| node_60: feature_name=ENSG00000130429  | feature_id[361].value > threshold=215.33999633789062 |
| Class: S                               |                                                      |
| Rules_20                               | passed counts:4                                      |
| node_0: feature_name=ENSG00000170312   | feature_id[0].value > threshold=120.56500244140625   |
| node_32: feature_name=ENSG00000140451  | feature_id[10].value > threshold=8.110000133514404   |
| node_80: feature_name=ENSG00000105173  | feature_id[48].value > threshold=98.07999801635742   |
| node_128: feature_name=ENSG00000173207 | feature_id[26].value <= threshold=529.4750061035156  |
| node_129: feature_name=ENSG00000112118 | feature_id[49].value <= threshold=74.27000045776367  |

|                                        |                                                       |
|----------------------------------------|-------------------------------------------------------|
| node_130: feature_name=ENSG00000166803 | feature_id[98].value > threshold=474.2050018310547    |
| Class: G2M                             |                                                       |
| Rules_21                               | passed counts:4                                       |
| node_0: feature_name=ENSG00000170312   | feature_id[0].value > threshold=120.56500244140625    |
| node_32: feature_name=ENSG00000140451  | feature_id[10].value <= threshold=8.110000133514404   |
| node_33: feature_name=ENSG00000100297  | feature_id[51].value <= threshold=111.95999908447266  |
| node_34: feature_name=ENSG00000150991  | feature_id[194].value <= threshold=998.7099914550781  |
| node_35: feature_name=ENSG00000175305  | feature_id[38].value > threshold=14.080000400543213   |
| node_45: feature_name=ENSG00000198554  | feature_id[457].value > threshold=40.564998626708984  |
| Class: G2M                             |                                                       |
| Rules_22                               | passed counts:3                                       |
| node_0: feature_name=ENSG00000170312   | feature_id[0].value > threshold=120.56500244140625    |
| node_32: feature_name=ENSG00000140451  | feature_id[10].value > threshold=8.110000133514404    |
| node_80: feature_name=ENSG00000105173  | feature_id[48].value > threshold=98.07999801635742    |
| node_128: feature_name=ENSG00000173207 | feature_id[26].value > threshold=529.4750061035156    |
| node_134: feature_name=ENSG00000106367 | feature_id[195].value <= threshold=167.65499877929688 |
| Class: S                               |                                                       |
| Rules_23                               | passed counts:3                                       |
| node_0: feature_name=ENSG00000170312   | feature_id[0].value > threshold=120.56500244140625    |
| node_32: feature_name=ENSG00000140451  | feature_id[10].value > threshold=8.110000133514404    |
| node_80: feature_name=ENSG00000105173  | feature_id[48].value <= threshold=98.07999801635742   |
| node_81: feature_name=ENSG00000170312  | feature_id[0].value > threshold=160.83999633789062    |

|                                        |                                                       |
|----------------------------------------|-------------------------------------------------------|
| node_87: feature_name=ENSG00000167978  | feature_id[187].value > threshold=37.79999923706055   |
| node_93: feature_name=ENSG00000137135  | feature_id[199].value > threshold=1.699999988079071   |
| node_97: feature_name=ENSG00000130429  | feature_id[361].value > threshold=323.2150115966797   |
| node_125: feature_name=ENSG00000011426 | feature_id[309].value <= threshold=152.47500610351562 |
| Class: G2M                             |                                                       |
| Rules_24                               | passed counts:3                                       |
| node_0: feature_name=ENSG00000170312   | feature_id[0].value > threshold=120.56500244140625    |
| node_32: feature_name=ENSG00000140451  | feature_id[10].value > threshold=8.110000133514404    |
| node_80: feature_name=ENSG00000105173  | feature_id[48].value <= threshold=98.07999801635742   |
| node_81: feature_name=ENSG00000170312  | feature_id[0].value > threshold=160.83999633789062    |
| node_87: feature_name=ENSG00000167978  | feature_id[187].value > threshold=37.79999923706055   |
| node_93: feature_name=ENSG00000137135  | feature_id[199].value > threshold=1.699999988079071   |
| node_97: feature_name=ENSG00000130429  | feature_id[361].value <= threshold=323.2150115966797  |
| node_98: feature_name=ENSG00000116717  | feature_id[135].value > threshold=13.164999961853027  |
| node_100: feature_name=ENSG00000117724 | feature_id[94].value > threshold=42.60000038146973    |
| node_114: feature_name=ENSG00000145604 | feature_id[390].value > threshold=104.21000289916992  |
| node_122: feature_name=ENSG00000134291 | feature_id[338].value > threshold=582.6800231933594   |
| Class: S                               |                                                       |
| Rules_25                               | passed counts:3                                       |
| node_0: feature_name=ENSG00000170312   | feature_id[0].value > threshold=120.56500244140625    |
| node_32: feature_name=ENSG00000140451  | feature_id[10].value > threshold=8.110000133514404    |
| node_80: feature_name=ENSG00000105173  | feature_id[48].value <= threshold=98.07999801635742   |
| node_81: feature_name=ENSG00000170312  | feature_id[0].value > threshold=160.83999633789062    |

|                                        |                                                       |
|----------------------------------------|-------------------------------------------------------|
| node_87: feature_name=ENSG00000167978  | feature_id[187].value > threshold=37.79999923706055   |
| node_93: feature_name=ENSG00000137135  | feature_id[199].value > threshold=1.699999988079071   |
| node_97: feature_name=ENSG00000130429  | feature_id[361].value <= threshold=323.2150115966797  |
| node_98: feature_name=ENSG00000116717  | feature_id[135].value > threshold=13.164999961853027  |
| node_100: feature_name=ENSG00000117724 | feature_id[94].value <= threshold=42.60000038146973   |
| node_101: feature_name=ENSG00000101003 | feature_id[339].value > threshold=18.390000343322754  |
| node_111: feature_name=ENSG00000198331 | feature_id[61].value <= threshold=33.454999923706055  |
| Class: G2M                             |                                                       |
|                                        |                                                       |
| Rules_26                               | passed counts:3                                       |
| node_0: feature_name=ENSG00000170312   | feature_id[0].value > threshold=120.56500244140625    |
| node_32: feature_name=ENSG00000140451  | feature_id[10].value > threshold=8.110000133514404    |
| node_80: feature_name=ENSG00000105173  | feature_id[48].value <= threshold=98.07999801635742   |
| node_81: feature_name=ENSG00000170312  | feature_id[0].value <= threshold=160.83999633789062   |
| node_82: feature_name=ENSG00000145604  | feature_id[390].value > threshold=68.21500015258789   |
| node_84: feature_name=ENSG00000144554  | feature_id[224].value <= threshold=28.510000228881836 |
| Class: S                               |                                                       |
|                                        |                                                       |
| Rules_27                               | passed counts:3                                       |
| node_0: feature_name=ENSG00000170312   | feature_id[0].value <= threshold=120.56500244140625   |
| node_1: feature_name=ENSG00000197061   | feature_id[2].value > threshold=794.760009765625      |
| node_27: feature_name=ENSG00000168476  | feature_id[217].value > threshold=39.849998474121094  |
| Class: G1                              |                                                       |
|                                        |                                                       |
| Rules_28                               | passed counts:3                                       |

|                                      |                                                       |
|--------------------------------------|-------------------------------------------------------|
| node_0: feature_name=ENSG00000170312 | feature_id[0].value <= threshold=120.56500244140625   |
| node_1: feature_name=ENSG00000197061 | feature_id[2].value <= threshold=794.760009765625     |
| node_2: feature_name=ENSG00000091164 | feature_id[188].value <= threshold=29.735000610351562 |
| node_3: feature_name=ENSG00000205352 | feature_id[211].value > threshold=60.20000076293945   |
| Class: S                             |                                                       |
| Rules_29                             | passed counts:3                                       |
| node_0: feature_name=ENSG00000170312 | feature_id[0].value <= threshold=120.56500244140625   |
| node_1: feature_name=ENSG00000197061 | feature_id[2].value <= threshold=794.760009765625     |
| node_2: feature_name=ENSG00000091164 | feature_id[188].value <= threshold=29.735000610351562 |
| node_3: feature_name=ENSG00000205352 | feature_id[211].value <= threshold=60.20000076293945  |
| node_4: feature_name=ENSG00000256618 | feature_id[362].value > threshold=599.9349975585938   |
| Class: G1                            |                                                       |
| Rules_30                             | passed counts:3                                       |
| node_0: feature_name=ENSG00000170312 | feature_id[0].value <= threshold=120.56500244140625   |
| node_1: feature_name=ENSG00000197061 | feature_id[2].value <= threshold=794.760009765625     |
| node_2: feature_name=ENSG00000091164 | feature_id[188].value <= threshold=29.735000610351562 |
| node_3: feature_name=ENSG00000205352 | feature_id[211].value <= threshold=60.20000076293945  |
| node_4: feature_name=ENSG00000256618 | feature_id[362].value <= threshold=599.9349975585938  |
| node_5: feature_name=ENSG00000128294 | feature_id[299].value <= threshold=1429.8699951171875 |
| Class: G2M                           |                                                       |
| Rules_31                             | passed counts:2                                       |
| node_0: feature_name=ENSG00000170312 | feature_id[0].value > threshold=120.56500244140625    |

|                                        |                                                       |
|----------------------------------------|-------------------------------------------------------|
| node_32: feature_name=ENSG00000140451  | feature_id[10].value > threshold=8.110000133514404    |
| node_80: feature_name=ENSG00000105173  | feature_id[48].value <= threshold=98.07999801635742   |
| node_81: feature_name=ENSG00000170312  | feature_id[0].value > threshold=160.83999633789062    |
| node_87: feature_name=ENSG00000167978  | feature_id[187].value > threshold=37.79999923706055   |
| node_93: feature_name=ENSG00000137135  | feature_id[199].value > threshold=1.699999988079071   |
| node_97: feature_name=ENSG00000130429  | feature_id[361].value <= threshold=323.2150115966797  |
| node_98: feature_name=ENSG00000116717  | feature_id[135].value > threshold=13.164999961853027  |
| node_100: feature_name=ENSG00000117724 | feature_id[94].value <= threshold=42.60000038146973   |
| node_101: feature_name=ENSG00000101003 | feature_id[339].value <= threshold=18.390000343322754 |
| node_102: feature_name=ENSG00000278259 | feature_id[436].value > threshold=66.98500061035156   |
| Class: S                               |                                                       |
|                                        |                                                       |
| Rules_32                               | passed counts:2                                       |
| node_0: feature_name=ENSG00000170312   | feature_id[0].value > threshold=120.56500244140625    |
| node_32: feature_name=ENSG00000140451  | feature_id[10].value > threshold=8.110000133514404    |
| node_80: feature_name=ENSG00000105173  | feature_id[48].value <= threshold=98.07999801635742   |
| node_81: feature_name=ENSG00000170312  | feature_id[0].value > threshold=160.83999633789062    |
| node_87: feature_name=ENSG00000167978  | feature_id[187].value > threshold=37.79999923706055   |
| node_93: feature_name=ENSG00000137135  | feature_id[199].value > threshold=1.699999988079071   |
| node_97: feature_name=ENSG00000130429  | feature_id[361].value <= threshold=323.2150115966797  |
| node_98: feature_name=ENSG00000116717  | feature_id[135].value > threshold=13.164999961853027  |
| node_100: feature_name=ENSG00000117724 | feature_id[94].value <= threshold=42.60000038146973   |
| node_101: feature_name=ENSG00000101003 | feature_id[339].value <= threshold=18.390000343322754 |
| node_102: feature_name=ENSG00000278259 | feature_id[436].value <= threshold=66.98500061035156  |
| node_103: feature_name=ENSG00000237649 | feature_id[104].value <= threshold=2.6549999713897705 |

|                                        |                                                       |
|----------------------------------------|-------------------------------------------------------|
| node_104: feature_name=ENSG00000167553 | feature_id[101].value <= threshold=1953.925048828125  |
| Class: S                               |                                                       |
| Rules_33                               | passed counts:2                                       |
| node_0: feature_name=ENSG00000170312   | feature_id[0].value > threshold=120.56500244140625    |
| node_32: feature_name=ENSG00000140451  | feature_id[10].value > threshold=8.110000133514404    |
| node_80: feature_name=ENSG00000105173  | feature_id[48].value <= threshold=98.07999801635742   |
| node_81: feature_name=ENSG00000170312  | feature_id[0].value > threshold=160.83999633789062    |
| node_87: feature_name=ENSG00000167978  | feature_id[187].value > threshold=37.79999923706055   |
| node_93: feature_name=ENSG00000137135  | feature_id[199].value > threshold=1.699999988079071   |
| node_97: feature_name=ENSG00000130429  | feature_id[361].value <= threshold=323.2150115966797  |
| node_98: feature_name=ENSG00000116717  | feature_id[135].value <= threshold=13.164999961853027 |
| Class: S                               |                                                       |
| Rules_34                               | passed counts:2                                       |
| node_0: feature_name=ENSG00000170312   | feature_id[0].value > threshold=120.56500244140625    |
| node_32: feature_name=ENSG00000140451  | feature_id[10].value <= threshold=8.110000133514404   |
| node_33: feature_name=ENSG00000100297  | feature_id[51].value > threshold=111.95999908447266   |
| node_51: feature_name=ENSG00000197061  | feature_id[2].value > threshold=468.4400177001953     |
| node_55: feature_name=ENSG00000012048  | feature_id[99].value > threshold=23.5600004196167     |
| node_63: feature_name=ENSG00000127564  | feature_id[107].value > threshold=22.22499942779541   |
| node_67: feature_name=ENSG00000167601  | feature_id[242].value > threshold=391.2899932861328   |
| Class: G2M                             |                                                       |
| Rules_35                               | passed counts:2                                       |



|                                       |                                                      |
|---------------------------------------|------------------------------------------------------|
| node_0: feature_name=ENSG00000170312  | feature_id[0].value > threshold=120.56500244140625   |
| node_32: feature_name=ENSG00000140451 | feature_id[10].value <= threshold=8.110000133514404  |
| node_33: feature_name=ENSG00000100297 | feature_id[51].value > threshold=111.95999908447266  |
| node_51: feature_name=ENSG00000197061 | feature_id[2].value > threshold=468.4400177001953    |
| node_55: feature_name=ENSG00000012048 | feature_id[99].value > threshold=23.5600004196167    |
| node_63: feature_name=ENSG00000127564 | feature_id[107].value > threshold=22.22499942779541  |
| node_67: feature_name=ENSG00000167601 | feature_id[242].value <= threshold=391.2899932861328 |
| node_68: feature_name=ENSG00000259848 | feature_id[68].value > threshold=239.00499725341797  |
| Class: G2M                            |                                                      |
| Rules_36                              | passed counts:2                                      |
| node_0: feature_name=ENSG00000170312  | feature_id[0].value > threshold=120.56500244140625   |
| node_32: feature_name=ENSG00000140451 | feature_id[10].value <= threshold=8.110000133514404  |
| node_33: feature_name=ENSG00000100297 | feature_id[51].value > threshold=111.95999908447266  |
| node_51: feature_name=ENSG00000197061 | feature_id[2].value > threshold=468.4400177001953    |
| node_55: feature_name=ENSG00000012048 | feature_id[99].value > threshold=23.5600004196167    |
| node_63: feature_name=ENSG00000127564 | feature_id[107].value <= threshold=22.22499942779541 |
| node_64: feature_name=ENSG00000161800 | feature_id[368].value > threshold=25.505000114440918 |
| Class: G2M                            |                                                      |
| Rules_37                              | passed counts:2                                      |
| node_0: feature_name=ENSG00000170312  | feature_id[0].value > threshold=120.56500244140625   |
| node_32: feature_name=ENSG00000140451 | feature_id[10].value <= threshold=8.110000133514404  |
| node_33: feature_name=ENSG00000100297 | feature_id[51].value > threshold=111.95999908447266  |
| node_51: feature_name=ENSG00000197061 | feature_id[2].value > threshold=468.4400177001953    |

|                                       |                                                      |
|---------------------------------------|------------------------------------------------------|
| node_55: feature_name=ENSG0000012048  | feature_id[99].value <= threshold=23.5600004196167   |
| node_56: feature_name=ENSG00000135451 | feature_id[93].value <= threshold=42.31999969482422  |
| node_57: feature_name=ENSG00000165502 | feature_id[258].value > threshold=488.7150115966797  |
| Class: G1                             |                                                      |
|                                       |                                                      |
| Rules_38                              | passed counts:2                                      |
| node_0: feature_name=ENSG00000170312  | feature_id[0].value > threshold=120.56500244140625   |
| node_32: feature_name=ENSG00000140451 | feature_id[10].value <= threshold=8.110000133514404  |
| node_33: feature_name=ENSG00000100297 | feature_id[51].value > threshold=111.95999908447266  |
| node_51: feature_name=ENSG00000197061 | feature_id[2].value <= threshold=468.4400177001953   |
| node_52: feature_name=ENSG00000125885 | feature_id[136].value > threshold=14.849999904632568 |
| Class: S                              |                                                      |
|                                       |                                                      |
| Rules_39                              | passed counts:2                                      |
| node_0: feature_name=ENSG00000170312  | feature_id[0].value > threshold=120.56500244140625   |
| node_32: feature_name=ENSG00000140451 | feature_id[10].value <= threshold=8.110000133514404  |
| node_33: feature_name=ENSG00000100297 | feature_id[51].value <= threshold=111.95999908447266 |
| node_34: feature_name=ENSG00000150991 | feature_id[194].value > threshold=998.7099914550781  |
| node_48: feature_name=ENSG00000205352 | feature_id[211].value <= threshold=73.43000030517578 |
| Class: G2M                            |                                                      |
|                                       |                                                      |
| Rules_40                              | passed counts:2                                      |
| node_0: feature_name=ENSG00000170312  | feature_id[0].value > threshold=120.56500244140625   |
| node_32: feature_name=ENSG00000140451 | feature_id[10].value <= threshold=8.110000133514404  |
| node_33: feature_name=ENSG00000100297 | feature_id[51].value <= threshold=111.95999908447266 |

|                                       |                                                       |
|---------------------------------------|-------------------------------------------------------|
| node_34: feature_name=ENSG00000150991 | feature_id[194].value <= threshold=998.7099914550781  |
| node_35: feature_name=ENSG00000175305 | feature_id[38].value <= threshold=14.080000400543213  |
| node_36: feature_name=ENSG00000127483 | feature_id[191].value > threshold=215.8800048828125   |
| node_42: feature_name=ENSG00000135185 | feature_id[409].value <= threshold=32.945000648498535 |
| Class: G1                             |                                                       |
|                                       |                                                       |
| Rules_41                              | passed counts:2                                       |
| node_0: feature_name=ENSG00000170312  | feature_id[0].value > threshold=120.56500244140625    |
| node_32: feature_name=ENSG00000140451 | feature_id[10].value <= threshold=8.110000133514404   |
| node_33: feature_name=ENSG00000100297 | feature_id[51].value <= threshold=111.95999908447266  |
| node_34: feature_name=ENSG00000150991 | feature_id[194].value <= threshold=998.7099914550781  |
| node_35: feature_name=ENSG00000175305 | feature_id[38].value <= threshold=14.080000400543213  |
| node_36: feature_name=ENSG00000127483 | feature_id[191].value <= threshold=215.8800048828125  |
| node_37: feature_name=ENSG00000171793 | feature_id[183].value > threshold=335.6300048828125   |
| Class: S                              |                                                       |
|                                       |                                                       |
| Rules_42                              | passed counts:2                                       |
| node_0: feature_name=ENSG00000170312  | feature_id[0].value <= threshold=120.56500244140625   |
| node_1: feature_name=ENSG00000197061  | feature_id[2].value <= threshold=794.760009765625     |
| node_2: feature_name=ENSG00000091164  | feature_id[188].value > threshold=29.735000610351562  |
| node_10: feature_name=ENSG00000093009 | feature_id[59].value > threshold=198.45000457763672   |
| Class: S                              |                                                       |
|                                       |                                                       |
| Rules_43                              | passed counts:1                                       |
| node_0: feature_name=ENSG00000170312  | feature_id[0].value > threshold=120.56500244140625    |

|                                        |                                                       |
|----------------------------------------|-------------------------------------------------------|
| node_32: feature_name=ENSG00000140451  | feature_id[10].value > threshold=8.110000133514404    |
| node_80: feature_name=ENSG00000105173  | feature_id[48].value > threshold=98.07999801635742    |
| node_128: feature_name=ENSG00000173207 | feature_id[26].value <= threshold=529.4750061035156   |
| node_129: feature_name=ENSG00000112118 | feature_id[49].value <= threshold=74.27000045776367   |
| node_130: feature_name=ENSG00000166803 | feature_id[98].value <= threshold=474.2050018310547   |
| Class: S                               |                                                       |
|                                        |                                                       |
| Rules_44                               | passed counts:1                                       |
| node_0: feature_name=ENSG00000170312   | feature_id[0].value > threshold=120.56500244140625    |
| node_32: feature_name=ENSG00000140451  | feature_id[10].value > threshold=8.110000133514404    |
| node_80: feature_name=ENSG00000105173  | feature_id[48].value <= threshold=98.07999801635742   |
| node_81: feature_name=ENSG00000170312  | feature_id[0].value > threshold=160.83999633789062    |
| node_87: feature_name=ENSG00000167978  | feature_id[187].value > threshold=37.79999923706055   |
| node_93: feature_name=ENSG00000137135  | feature_id[199].value > threshold=1.69999988079071    |
| node_97: feature_name=ENSG00000130429  | feature_id[361].value <= threshold=323.2150115966797  |
| node_98: feature_name=ENSG00000116717  | feature_id[135].value > threshold=13.164999961853027  |
| node_100: feature_name=ENSG00000117724 | feature_id[94].value > threshold=42.60000038146973    |
| node_114: feature_name=ENSG00000145604 | feature_id[390].value <= threshold=104.21000289916992 |
| node_115: feature_name=ENSG00000183741 | feature_id[331].value > threshold=45.329999923706055  |
| Class: S                               |                                                       |
|                                        |                                                       |
| Rules_45                               | passed counts:1                                       |
| node_0: feature_name=ENSG00000170312   | feature_id[0].value > threshold=120.56500244140625    |
| node_32: feature_name=ENSG00000140451  | feature_id[10].value > threshold=8.110000133514404    |
| node_80: feature_name=ENSG00000105173  | feature_id[48].value <= threshold=98.07999801635742   |

|                                        |                                                       |
|----------------------------------------|-------------------------------------------------------|
| node_81: feature_name=ENSG00000170312  | feature_id[0].value > threshold=160.83999633789062    |
| node_87: feature_name=ENSG00000167978  | feature_id[187].value > threshold=37.79999923706055   |
| node_93: feature_name=ENSG00000137135  | feature_id[199].value > threshold=1.699999988079071   |
| node_97: feature_name=ENSG00000130429  | feature_id[361].value <= threshold=323.2150115966797  |
| node_98: feature_name=ENSG00000116717  | feature_id[135].value > threshold=13.164999961853027  |
| node_100: feature_name=ENSG00000117724 | feature_id[94].value > threshold=42.60000038146973    |
| node_114: feature_name=ENSG00000145604 | feature_id[390].value <= threshold=104.21000289916992 |
| node_115: feature_name=ENSG00000183741 | feature_id[331].value <= threshold=45.329999923706055 |
| node_116: feature_name=ENSG00000122565 | feature_id[346].value > threshold=237.02999877929688  |
| node_118: feature_name=ENSG00000111859 | feature_id[246].value > threshold=4.139999866485596   |
| Class: G2M                             |                                                       |
|                                        |                                                       |
| Rules_46                               | passed counts:1                                       |
| node_0: feature_name=ENSG00000170312   | feature_id[0].value > threshold=120.56500244140625    |
| node_32: feature_name=ENSG00000140451  | feature_id[10].value > threshold=8.110000133514404    |
| node_80: feature_name=ENSG00000105173  | feature_id[48].value <= threshold=98.07999801635742   |
| node_81: feature_name=ENSG00000170312  | feature_id[0].value > threshold=160.83999633789062    |
| node_87: feature_name=ENSG00000167978  | feature_id[187].value > threshold=37.79999923706055   |
| node_93: feature_name=ENSG00000137135  | feature_id[199].value > threshold=1.699999988079071   |
| node_97: feature_name=ENSG00000130429  | feature_id[361].value <= threshold=323.2150115966797  |
| node_98: feature_name=ENSG00000116717  | feature_id[135].value > threshold=13.164999961853027  |
| node_100: feature_name=ENSG00000117724 | feature_id[94].value > threshold=42.60000038146973    |
| node_114: feature_name=ENSG00000145604 | feature_id[390].value <= threshold=104.21000289916992 |
| node_115: feature_name=ENSG00000183741 | feature_id[331].value <= threshold=45.329999923706055 |
| node_116: feature_name=ENSG00000122565 | feature_id[346].value > threshold=237.02999877929688  |

|                                        |                                                       |
|----------------------------------------|-------------------------------------------------------|
| node_118: feature_name=ENSG00000111859 | feature_id[246].value <= threshold=4.139999866485596  |
| Class: S                               |                                                       |
|                                        |                                                       |
| Rules_47                               | passed counts:1                                       |
| node_0: feature_name=ENSG00000170312   | feature_id[0].value > threshold=120.56500244140625    |
| node_32: feature_name=ENSG00000140451  | feature_id[10].value > threshold=8.110000133514404    |
| node_80: feature_name=ENSG00000105173  | feature_id[48].value <= threshold=98.07999801635742   |
| node_81: feature_name=ENSG00000170312  | feature_id[0].value > threshold=160.83999633789062    |
| node_87: feature_name=ENSG00000167978  | feature_id[187].value > threshold=37.79999923706055   |
| node_93: feature_name=ENSG00000137135  | feature_id[199].value > threshold=1.699999988079071   |
| node_97: feature_name=ENSG00000130429  | feature_id[361].value <= threshold=323.2150115966797  |
| node_98: feature_name=ENSG00000116717  | feature_id[135].value > threshold=13.164999961853027  |
| node_100: feature_name=ENSG00000117724 | feature_id[94].value <= threshold=42.60000038146973   |
| node_101: feature_name=ENSG00000101003 | feature_id[339].value <= threshold=18.390000343322754 |
| node_102: feature_name=ENSG00000278259 | feature_id[436].value <= threshold=66.98500061035156  |
| node_103: feature_name=ENSG00000237649 | feature_id[104].value > threshold=2.6549999713897705  |
| node_107: feature_name=ENSG00000183726 | feature_id[461].value <= threshold=36.849998474121094 |
| Class: S                               |                                                       |
|                                        |                                                       |
| Rules_48                               | passed counts:1                                       |
| node_0: feature_name=ENSG00000170312   | feature_id[0].value > threshold=120.56500244140625    |
| node_32: feature_name=ENSG00000140451  | feature_id[10].value > threshold=8.110000133514404    |
| node_80: feature_name=ENSG00000105173  | feature_id[48].value <= threshold=98.07999801635742   |
| node_81: feature_name=ENSG00000170312  | feature_id[0].value > threshold=160.83999633789062    |
| node_87: feature_name=ENSG00000167978  | feature_id[187].value > threshold=37.79999923706055   |

|                                        |                                                       |
|----------------------------------------|-------------------------------------------------------|
| node_93: feature_name=ENSG00000137135  | feature_id[199].value > threshold=1.69999988079071    |
| node_97: feature_name=ENSG00000130429  | feature_id[361].value <= threshold=323.2150115966797  |
| node_98: feature_name=ENSG00000116717  | feature_id[135].value > threshold=13.164999961853027  |
| node_100: feature_name=ENSG00000117724 | feature_id[94].value <= threshold=42.60000038146973   |
| node_101: feature_name=ENSG00000101003 | feature_id[339].value <= threshold=18.390000343322754 |
| node_102: feature_name=ENSG00000278259 | feature_id[436].value <= threshold=66.98500061035156  |
| node_103: feature_name=ENSG00000237649 | feature_id[104].value <= threshold=2.6549999713897705 |
| node_104: feature_name=ENSG00000167553 | feature_id[101].value > threshold=1953.925048828125   |
| Class: G2M                             |                                                       |
| Rules_49                               | passed counts:1                                       |
| node_0: feature_name=ENSG00000170312   | feature_id[0].value > threshold=120.56500244140625    |
| node_32: feature_name=ENSG00000140451  | feature_id[10].value > threshold=8.110000133514404    |
| node_80: feature_name=ENSG00000105173  | feature_id[48].value <= threshold=98.07999801635742   |
| node_81: feature_name=ENSG00000170312  | feature_id[0].value > threshold=160.83999633789062    |
| node_87: feature_name=ENSG00000167978  | feature_id[187].value > threshold=37.79999923706055   |
| node_93: feature_name=ENSG00000137135  | feature_id[199].value <= threshold=1.69999988079071   |
| node_94: feature_name=ENSG00000089693  | feature_id[453].value > threshold=316.0400085449219   |
| Class: G2M                             |                                                       |
| Rules_50                               | passed counts:1                                       |
| node_0: feature_name=ENSG00000170312   | feature_id[0].value > threshold=120.56500244140625    |
| node_32: feature_name=ENSG00000140451  | feature_id[10].value > threshold=8.110000133514404    |
| node_80: feature_name=ENSG00000105173  | feature_id[48].value <= threshold=98.07999801635742   |
| node_81: feature_name=ENSG00000170312  | feature_id[0].value > threshold=160.83999633789062    |

|                                       |                                                      |
|---------------------------------------|------------------------------------------------------|
| node_87: feature_name=ENSG00000167978 | feature_id[187].value <= threshold=37.79999923706055 |
| node_88: feature_name=ENSG00000169490 | feature_id[354].value <= threshold=62.83999824523926 |
| node_89: feature_name=ENSG00000135476 | feature_id[129].value > threshold=13.0               |
| Class: G1                             |                                                      |
|                                       |                                                      |
| Rules_51                              | passed counts:1                                      |
| node_0: feature_name=ENSG00000170312  | feature_id[0].value > threshold=120.56500244140625   |
| node_32: feature_name=ENSG00000140451 | feature_id[10].value > threshold=8.110000133514404   |
| node_80: feature_name=ENSG00000105173 | feature_id[48].value <= threshold=98.07999801635742  |
| node_81: feature_name=ENSG00000170312 | feature_id[0].value > threshold=160.83999633789062   |
| node_87: feature_name=ENSG00000167978 | feature_id[187].value <= threshold=37.79999923706055 |
| node_88: feature_name=ENSG00000169490 | feature_id[354].value <= threshold=62.83999824523926 |
| node_89: feature_name=ENSG00000135476 | feature_id[129].value <= threshold=13.0              |
| Class: G2M                            |                                                      |
|                                       |                                                      |
| Rules_52                              | passed counts:1                                      |
| node_0: feature_name=ENSG00000170312  | feature_id[0].value > threshold=120.56500244140625   |
| node_32: feature_name=ENSG00000140451 | feature_id[10].value > threshold=8.110000133514404   |
| node_80: feature_name=ENSG00000105173 | feature_id[48].value <= threshold=98.07999801635742  |
| node_81: feature_name=ENSG00000170312 | feature_id[0].value <= threshold=160.83999633789062  |
| node_82: feature_name=ENSG00000145604 | feature_id[390].value > threshold=68.21500015258789  |
| node_84: feature_name=ENSG00000144554 | feature_id[224].value > threshold=28.510000228881836 |
| Class: G2M                            |                                                      |
|                                       |                                                      |
| Rules_53                              | passed counts:1                                      |



|                                       |                                                      |
|---------------------------------------|------------------------------------------------------|
| node_0: feature_name=ENSG00000170312  | feature_id[0].value > threshold=120.56500244140625   |
| node_32: feature_name=ENSG00000140451 | feature_id[10].value <= threshold=8.110000133514404  |
| node_33: feature_name=ENSG00000100297 | feature_id[51].value > threshold=111.95999908447266  |
| node_51: feature_name=ENSG00000197061 | feature_id[2].value > threshold=468.4400177001953    |
| node_55: feature_name=ENSG00000012048 | feature_id[99].value > threshold=23.5600004196167    |
| node_63: feature_name=ENSG00000127564 | feature_id[107].value > threshold=22.22499942779541  |
| node_67: feature_name=ENSG00000167601 | feature_id[242].value <= threshold=391.2899932861328 |
| node_68: feature_name=ENSG00000259848 | feature_id[68].value <= threshold=239.00499725341797 |
| node_69: feature_name=ENSG00000117650 | feature_id[84].value > threshold=76.625              |
| Class: G1                             |                                                      |
|                                       |                                                      |
| Rules_54                              | passed counts:1                                      |
| node_0: feature_name=ENSG00000170312  | feature_id[0].value > threshold=120.56500244140625   |
| node_32: feature_name=ENSG00000140451 | feature_id[10].value <= threshold=8.110000133514404  |
| node_33: feature_name=ENSG00000100297 | feature_id[51].value > threshold=111.95999908447266  |
| node_51: feature_name=ENSG00000197061 | feature_id[2].value > threshold=468.4400177001953    |
| node_55: feature_name=ENSG00000012048 | feature_id[99].value > threshold=23.5600004196167    |
| node_63: feature_name=ENSG00000127564 | feature_id[107].value > threshold=22.22499942779541  |
| node_67: feature_name=ENSG00000167601 | feature_id[242].value <= threshold=391.2899932861328 |
| node_68: feature_name=ENSG00000259848 | feature_id[68].value <= threshold=239.00499725341797 |
| node_69: feature_name=ENSG00000117650 | feature_id[84].value <= threshold=76.625             |
| node_70: feature_name=ENSG00000185361 | feature_id[58].value > threshold=12.335000038146973  |
| Class: G2M                            |                                                      |
|                                       |                                                      |
| Rules_55                              | passed counts:1                                      |

|                                       |                                                      |
|---------------------------------------|------------------------------------------------------|
| node_0: feature_name=ENSG00000170312  | feature_id[0].value > threshold=120.56500244140625   |
| node_32: feature_name=ENSG00000140451 | feature_id[10].value <= threshold=8.110000133514404  |
| node_33: feature_name=ENSG00000100297 | feature_id[51].value > threshold=111.95999908447266  |
| node_51: feature_name=ENSG00000197061 | feature_id[2].value > threshold=468.4400177001953    |
| node_55: feature_name=ENSG00000012048 | feature_id[99].value > threshold=23.5600004196167    |
| node_63: feature_name=ENSG00000127564 | feature_id[107].value > threshold=22.22499942779541  |
| node_67: feature_name=ENSG00000167601 | feature_id[242].value <= threshold=391.2899932861328 |
| node_68: feature_name=ENSG00000259848 | feature_id[68].value <= threshold=239.00499725341797 |
| node_69: feature_name=ENSG00000117650 | feature_id[84].value <= threshold=76.625             |
| node_70: feature_name=ENSG00000185361 | feature_id[58].value <= threshold=12.335000038146973 |
| node_71: feature_name=ENSG00000121152 | feature_id[33].value > threshold=224.78500366210938  |
| Class: G2M                            |                                                      |
|                                       |                                                      |
| Rules_56                              | passed counts:1                                      |
| node_0: feature_name=ENSG00000170312  | feature_id[0].value > threshold=120.56500244140625   |
| node_32: feature_name=ENSG00000140451 | feature_id[10].value <= threshold=8.110000133514404  |
| node_33: feature_name=ENSG00000100297 | feature_id[51].value > threshold=111.95999908447266  |
| node_51: feature_name=ENSG00000197061 | feature_id[2].value > threshold=468.4400177001953    |
| node_55: feature_name=ENSG00000012048 | feature_id[99].value > threshold=23.5600004196167    |
| node_63: feature_name=ENSG00000127564 | feature_id[107].value > threshold=22.22499942779541  |
| node_67: feature_name=ENSG00000167601 | feature_id[242].value <= threshold=391.2899932861328 |
| node_68: feature_name=ENSG00000259848 | feature_id[68].value <= threshold=239.00499725341797 |
| node_69: feature_name=ENSG00000117650 | feature_id[84].value <= threshold=76.625             |
| node_70: feature_name=ENSG00000185361 | feature_id[58].value <= threshold=12.335000038146973 |
| node_71: feature_name=ENSG00000121152 | feature_id[33].value <= threshold=224.78500366210938 |

|                                       |                                                        |
|---------------------------------------|--------------------------------------------------------|
| node_72: feature_name=ENSG00000151503 | feature_id[451].value <= threshold=0.26499998569488525 |
| Class: G2M                            |                                                        |
| Rules_57                              | passed counts:1                                        |
| node_0: feature_name=ENSG00000170312  | feature_id[0].value > threshold=120.56500244140625     |
| node_32: feature_name=ENSG00000140451 | feature_id[10].value <= threshold=8.110000133514404    |
| node_33: feature_name=ENSG00000100297 | feature_id[51].value > threshold=111.95999908447266    |
| node_51: feature_name=ENSG00000197061 | feature_id[2].value > threshold=468.4400177001953      |
| node_55: feature_name=ENSG0000012048  | feature_id[99].value > threshold=23.5600004196167      |
| node_63: feature_name=ENSG00000127564 | feature_id[107].value <= threshold=22.22499942779541   |
| node_64: feature_name=ENSG00000161800 | feature_id[368].value <= threshold=25.505000114440918  |
| Class: G1                             |                                                        |
| Rules_58                              | passed counts:1                                        |
| node_0: feature_name=ENSG00000170312  | feature_id[0].value > threshold=120.56500244140625     |
| node_32: feature_name=ENSG00000140451 | feature_id[10].value <= threshold=8.110000133514404    |
| node_33: feature_name=ENSG00000100297 | feature_id[51].value <= threshold=111.95999908447266   |
| node_34: feature_name=ENSG00000150991 | feature_id[194].value <= threshold=998.7099914550781   |
| node_35: feature_name=ENSG00000175305 | feature_id[38].value <= threshold=14.080000400543213   |
| node_36: feature_name=ENSG00000127483 | feature_id[191].value > threshold=215.8800048828125    |
| node_42: feature_name=ENSG00000135185 | feature_id[409].value > threshold=32.945000648498535   |
| Class: S                              |                                                        |
| Rules_59                              | passed counts:1                                        |
| node_0: feature_name=ENSG00000170312  | feature_id[0].value > threshold=120.56500244140625     |

|                                       |                                                       |
|---------------------------------------|-------------------------------------------------------|
| node_32: feature_name=ENSG00000140451 | feature_id[10].value <= threshold=8.110000133514404   |
| node_33: feature_name=ENSG00000100297 | feature_id[51].value <= threshold=111.95999908447266  |
| node_34: feature_name=ENSG00000150991 | feature_id[194].value <= threshold=998.7099914550781  |
| node_35: feature_name=ENSG00000175305 | feature_id[38].value <= threshold=14.080000400543213  |
| node_36: feature_name=ENSG00000127483 | feature_id[191].value <= threshold=215.8800048828125  |
| node_37: feature_name=ENSG00000171793 | feature_id[183].value <= threshold=335.6300048828125  |
| node_38: feature_name=ENSG00000130429 | feature_id[361].value > threshold=291.3249969482422   |
| Class: S                              |                                                       |
|                                       |                                                       |
| Rules_60                              | passed counts:1                                       |
| node_0: feature_name=ENSG00000170312  | feature_id[0].value <= threshold=120.56500244140625   |
| node_1: feature_name=ENSG00000197061  | feature_id[2].value > threshold=794.760009765625      |
| node_27: feature_name=ENSG00000168476 | feature_id[217].value <= threshold=39.849998474121094 |
| node_28: feature_name=ENSG00000034510 | feature_id[424].value > threshold=9527.485107421875   |
| Class: G1                             |                                                       |
|                                       |                                                       |
| Rules_61                              | passed counts:1                                       |
| node_0: feature_name=ENSG00000170312  | feature_id[0].value <= threshold=120.56500244140625   |
| node_1: feature_name=ENSG00000197061  | feature_id[2].value <= threshold=794.760009765625     |
| node_2: feature_name=ENSG00000091164  | feature_id[188].value > threshold=29.735000610351562  |
| node_10: feature_name=ENSG00000093009 | feature_id[59].value <= threshold=198.45000457763672  |
| node_11: feature_name=ENSG00000154640 | feature_id[353].value > threshold=326.40999603271484  |
| Class: S                              |                                                       |
|                                       |                                                       |
| Rules_62                              | passed counts:1                                       |

|                                       |                                                       |
|---------------------------------------|-------------------------------------------------------|
| node_0: feature_name=ENSG00000170312  | feature_id[0].value <= threshold=120.56500244140625   |
| node_1: feature_name=ENSG00000197061  | feature_id[2].value <= threshold=794.760009765625     |
| node_2: feature_name=ENSG00000091164  | feature_id[188].value > threshold=29.735000610351562  |
| node_10: feature_name=ENSG00000093009 | feature_id[59].value <= threshold=198.45000457763672  |
| node_11: feature_name=ENSG00000154640 | feature_id[353].value <= threshold=326.40999603271484 |
| node_12: feature_name=ENSG00000106462 | feature_id[284].value > threshold=37.8650016784668    |
| Class: S                              |                                                       |
|                                       |                                                       |
| Rules_63                              | passed counts:1                                       |
| node_0: feature_name=ENSG00000170312  | feature_id[0].value <= threshold=120.56500244140625   |
| node_1: feature_name=ENSG00000197061  | feature_id[2].value <= threshold=794.760009765625     |
| node_2: feature_name=ENSG00000091164  | feature_id[188].value > threshold=29.735000610351562  |
| node_10: feature_name=ENSG00000093009 | feature_id[59].value <= threshold=198.45000457763672  |
| node_11: feature_name=ENSG00000154640 | feature_id[353].value <= threshold=326.40999603271484 |
| node_12: feature_name=ENSG00000106462 | feature_id[284].value <= threshold=37.8650016784668   |
| node_13: feature_name=ENSG00000138376 | feature_id[137].value > threshold=85.30999755859375   |
| Class: S                              |                                                       |
|                                       |                                                       |
| Rules_64                              | passed counts:1                                       |
| node_0: feature_name=ENSG00000170312  | feature_id[0].value <= threshold=120.56500244140625   |
| node_1: feature_name=ENSG00000197061  | feature_id[2].value <= threshold=794.760009765625     |
| node_2: feature_name=ENSG00000091164  | feature_id[188].value > threshold=29.735000610351562  |
| node_10: feature_name=ENSG00000093009 | feature_id[59].value <= threshold=198.45000457763672  |
| node_11: feature_name=ENSG00000154640 | feature_id[353].value <= threshold=326.40999603271484 |
| node_12: feature_name=ENSG00000106462 | feature_id[284].value <= threshold=37.8650016784668   |

|                                       |                                                       |
|---------------------------------------|-------------------------------------------------------|
| node_13: feature_name=ENSG00000138376 | feature_id[137].value <= threshold=85.30999755859375  |
| node_14: feature_name=ENSG00000173207 | feature_id[26].value > threshold=800.375              |
| node_20: feature_name=ENSG00000186871 | feature_id[455].value > threshold=14.990000247955322  |
| Class: G1                             |                                                       |
|                                       |                                                       |
| Rules_65                              | passed counts:1                                       |
| node_0: feature_name=ENSG00000170312  | feature_id[0].value <= threshold=120.56500244140625   |
| node_1: feature_name=ENSG00000197061  | feature_id[2].value <= threshold=794.760009765625     |
| node_2: feature_name=ENSG00000091164  | feature_id[188].value > threshold=29.735000610351562  |
| node_10: feature_name=ENSG00000093009 | feature_id[59].value <= threshold=198.45000457763672  |
| node_11: feature_name=ENSG00000154640 | feature_id[353].value <= threshold=326.40999603271484 |
| node_12: feature_name=ENSG00000106462 | feature_id[284].value <= threshold=37.8650016784668   |
| node_13: feature_name=ENSG00000138376 | feature_id[137].value <= threshold=85.30999755859375  |
| node_14: feature_name=ENSG00000173207 | feature_id[26].value > threshold=800.375              |
| node_20: feature_name=ENSG00000186871 | feature_id[455].value <= threshold=14.990000247955322 |
| Class: G2M                            |                                                       |
|                                       |                                                       |
| Rules_66                              | passed counts:1                                       |
| node_0: feature_name=ENSG00000170312  | feature_id[0].value <= threshold=120.56500244140625   |
| node_1: feature_name=ENSG00000197061  | feature_id[2].value <= threshold=794.760009765625     |
| node_2: feature_name=ENSG00000091164  | feature_id[188].value > threshold=29.735000610351562  |
| node_10: feature_name=ENSG00000093009 | feature_id[59].value <= threshold=198.45000457763672  |
| node_11: feature_name=ENSG00000154640 | feature_id[353].value <= threshold=326.40999603271484 |
| node_12: feature_name=ENSG00000106462 | feature_id[284].value <= threshold=37.8650016784668   |
| node_13: feature_name=ENSG00000138376 | feature_id[137].value <= threshold=85.30999755859375  |

|                                       |                                                       |
|---------------------------------------|-------------------------------------------------------|
| node_14: feature_name=ENSG00000173207 | feature_id[26].value <= threshold=800.375             |
| node_15: feature_name=ENSG00000232388 | feature_id[360].value > threshold=253.9800033569336   |
| node_17: feature_name=ENSG00000101608 | feature_id[330].value > threshold=883.2449951171875   |
| Class: S                              |                                                       |
|                                       |                                                       |
| Rules_67                              | passed counts:1                                       |
| node_0: feature_name=ENSG00000170312  | feature_id[0].value <= threshold=120.56500244140625   |
| node_1: feature_name=ENSG00000197061  | feature_id[2].value <= threshold=794.760009765625     |
| node_2: feature_name=ENSG00000091164  | feature_id[188].value > threshold=29.735000610351562  |
| node_10: feature_name=ENSG00000093009 | feature_id[59].value <= threshold=198.45000457763672  |
| node_11: feature_name=ENSG00000154640 | feature_id[353].value <= threshold=326.40999603271484 |
| node_12: feature_name=ENSG00000106462 | feature_id[284].value <= threshold=37.8650016784668   |
| node_13: feature_name=ENSG00000138376 | feature_id[137].value <= threshold=85.30999755859375  |
| node_14: feature_name=ENSG00000173207 | feature_id[26].value <= threshold=800.375             |
| node_15: feature_name=ENSG00000232388 | feature_id[360].value > threshold=253.9800033569336   |
| node_17: feature_name=ENSG00000101608 | feature_id[330].value <= threshold=883.2449951171875  |
| Class: G1                             |                                                       |
|                                       |                                                       |
| Rules_68                              | passed counts:1                                       |
| node_0: feature_name=ENSG00000170312  | feature_id[0].value <= threshold=120.56500244140625   |
| node_1: feature_name=ENSG00000197061  | feature_id[2].value <= threshold=794.760009765625     |
| node_2: feature_name=ENSG00000091164  | feature_id[188].value <= threshold=29.735000610351562 |
| node_3: feature_name=ENSG00000205352  | feature_id[211].value <= threshold=60.20000076293945  |
| node_4: feature_name=ENSG00000256618  | feature_id[362].value <= threshold=599.9349975585938  |
| node_5: feature_name=ENSG00000128294  | feature_id[299].value > threshold=1429.8699951171875  |

Class: G1

(3) Rules on features selected by SHAP by LightGBM

|                                        |                                                      |
|----------------------------------------|------------------------------------------------------|
| Rules_0                                | passed counts:311                                    |
| node_0: feature_name=ENSG00000170312   | feature_id[0].value <= threshold=120.56500244140625  |
| node_1: feature_name=ENSG00000197061   | feature_id[1].value <= threshold=794.760009765625    |
| node_2: feature_name=ENSG00000145425   | feature_id[46].value <= threshold=4353.8848876953125 |
| node_3: feature_name=ENSG00000127948   | feature_id[39].value > threshold=4.385000109672546   |
| node_9: feature_name=ENSG00000150991   | feature_id[6].value > threshold=72.85999965667725    |
| node_11: feature_name=ENSG00000014138  | feature_id[17].value <= threshold=102.51499938964844 |
| node_12: feature_name=ENSG00000087077  | feature_id[71].value > threshold=35.76500129699707   |
| node_16: feature_name=ENSG00000007968  | feature_id[68].value <= threshold=20.079999923706055 |
| Class: G1                              |                                                      |
|                                        |                                                      |
| Rules_1                                | passed counts:233                                    |
| node_0: feature_name=ENSG00000170312   | feature_id[0].value > threshold=120.56500244140625   |
| node_30: feature_name=ENSG00000140451  | feature_id[3].value > threshold=8.110000133514404    |
| node_88: feature_name=ENSG00000105173  | feature_id[8].value <= threshold=98.07999801635742   |
| node_89: feature_name=ENSG00000170312  | feature_id[0].value > threshold=160.83999633789062   |
| node_95: feature_name=ENSG00000167978  | feature_id[48].value > threshold=37.79999923706055   |
| node_101: feature_name=ENSG00000130429 | feature_id[93].value <= threshold=323.2150115966797  |
| node_102: feature_name=ENSG00000117724 | feature_id[61].value > threshold=42.60000038146973   |
| node_118: feature_name=ENSG00000276368 | feature_id[29].value <= threshold=333.0249938964844  |
| node_119: feature_name=ENSG00000122952 | feature_id[54].value <= threshold=716.2649841308594  |
| node_120: feature_name=ENSG00000092853 | feature_id[75].value <= threshold=40.64500045776367  |



|                                        |                                                       |
|----------------------------------------|-------------------------------------------------------|
| node_121: feature_name=ENSG00000177426 | feature_id[37].value > threshold=32.579999923706055   |
| node_125: feature_name=ENSG00000178913 | feature_id[76].value <= threshold=114.549999923706055 |
| node_126: feature_name=ENSG00000146670 | feature_id[66].value > threshold=33.939998626708984   |
| Class: G2M                             |                                                       |
|                                        |                                                       |
| Rules_2                                | passed counts:201                                     |
| node_0: feature_name=ENSG00000170312   | feature_id[0].value > threshold=120.56500244140625    |
| node_30: feature_name=ENSG00000140451  | feature_id[3].value <= threshold=8.110000133514404    |
| node_31: feature_name=ENSG00000100297  | feature_id[28].value > threshold=111.95999908447266   |
| node_51: feature_name=ENSG00000197061  | feature_id[1].value > threshold=468.4400177001953     |
| node_55: feature_name=ENSG00000012048  | feature_id[12].value > threshold=23.5600004196167     |
| node_67: feature_name=ENSG00000127564  | feature_id[86].value > threshold=22.22499942779541    |
| node_71: feature_name=ENSG00000167601  | feature_id[30].value <= threshold=391.2899932861328   |
| node_72: feature_name=ENSG00000229089  | feature_id[5].value <= threshold=106.125              |
| node_73: feature_name=ENSG00000117399  | feature_id[21].value <= threshold=510.64500427246094  |
| node_74: feature_name=ENSG00000185361  | feature_id[97].value <= threshold=12.335000038146973  |
| node_75: feature_name=ENSG00000146670  | feature_id[66].value > threshold=38.46000099182129    |
| node_79: feature_name=ENSG00000173207  | feature_id[27].value <= threshold=653.6899719238281   |
| Class: S                               |                                                       |
|                                        |                                                       |
| Rules_3                                | passed counts:46                                      |
| node_0: feature_name=ENSG00000170312   | feature_id[0].value > threshold=120.56500244140625    |
| node_30: feature_name=ENSG00000140451  | feature_id[3].value > threshold=8.110000133514404     |
| node_88: feature_name=ENSG00000105173  | feature_id[8].value <= threshold=98.07999801635742    |
| node_89: feature_name=ENSG00000170312  | feature_id[0].value > threshold=160.83999633789062    |

|                                        |                                                      |
|----------------------------------------|------------------------------------------------------|
| node_95: feature_name=ENSG00000167978  | feature_id[48].value > threshold=37.79999923706055   |
| node_101: feature_name=ENSG00000130429 | feature_id[93].value <= threshold=323.2150115966797  |
| node_102: feature_name=ENSG00000117724 | feature_id[61].value <= threshold=42.60000038146973  |
| node_103: feature_name=ENSG00000101003 | feature_id[65].value <= threshold=18.390000343322754 |
| node_104: feature_name=ENSG00000112029 | feature_id[18].value <= threshold=93.15499877929688  |
| node_105: feature_name=ENSG00000114346 | feature_id[74].value > threshold=8.815000057220459   |
| node_107: feature_name=ENSG00000149548 | feature_id[83].value <= threshold=6.200000047683716  |
| node_108: feature_name=ENSG00000128340 | feature_id[85].value > threshold=5.1000001430511475  |
| Class: G2M                             |                                                      |
|                                        |                                                      |
| Rules_4                                | passed counts:36                                     |
| node_0: feature_name=ENSG00000170312   | feature_id[0].value > threshold=120.56500244140625   |
| node_30: feature_name=ENSG00000140451  | feature_id[3].value <= threshold=8.110000133514404   |
| node_31: feature_name=ENSG00000100297  | feature_id[28].value <= threshold=111.95999908447266 |
| node_32: feature_name=ENSG00000150991  | feature_id[6].value <= threshold=998.7099914550781   |
| node_33: feature_name=ENSG00000175305  | feature_id[35].value <= threshold=14.080000400543213 |
| node_34: feature_name=ENSG00000186767  | feature_id[89].value <= threshold=22.6850004196167   |
| node_35: feature_name=ENSG00000185361  | feature_id[97].value <= threshold=16.954999923706055 |
| node_36: feature_name=ENSG00000177426  | feature_id[37].value <= threshold=286.0399932861328  |
| Class: G2M                             |                                                      |
|                                        |                                                      |
| Rules_5                                | passed counts:21                                     |
| node_0: feature_name=ENSG00000170312   | feature_id[0].value > threshold=120.56500244140625   |
| node_30: feature_name=ENSG00000140451  | feature_id[3].value > threshold=8.110000133514404    |
| node_88: feature_name=ENSG00000105173  | feature_id[8].value > threshold=98.07999801635742    |

|                                        |                                                      |
|----------------------------------------|------------------------------------------------------|
| node_140: feature_name=ENSG00000173207 | feature_id[27].value <= threshold=529.4750061035156  |
| node_141: feature_name=ENSG00000185361 | feature_id[97].value <= threshold=7.180000066757202  |
| node_142: feature_name=ENSG00000128340 | feature_id[85].value > threshold=16.95500087738037   |
| Class: S                               |                                                      |
|                                        |                                                      |
| Rules_6                                | passed counts:17                                     |
| node_0: feature_name=ENSG00000170312   | feature_id[0].value > threshold=120.56500244140625   |
| node_30: feature_name=ENSG00000140451  | feature_id[3].value <= threshold=8.110000133514404   |
| node_31: feature_name=ENSG00000100297  | feature_id[28].value <= threshold=111.95999908447266 |
| node_32: feature_name=ENSG00000150991  | feature_id[6].value > threshold=998.7099914550781    |
| node_48: feature_name=ENSG00000205352  | feature_id[88].value > threshold=73.43000030517578   |
| Class: S                               |                                                      |
|                                        |                                                      |
| Rules_7                                | passed counts:15                                     |
| node_0: feature_name=ENSG00000170312   | feature_id[0].value > threshold=120.56500244140625   |
| node_30: feature_name=ENSG00000140451  | feature_id[3].value > threshold=8.110000133514404    |
| node_88: feature_name=ENSG00000105173  | feature_id[8].value > threshold=98.07999801635742    |
| node_140: feature_name=ENSG00000173207 | feature_id[27].value > threshold=529.4750061035156   |
| node_146: feature_name=ENSG00000170540 | feature_id[57].value > threshold=46.05500030517578   |
| node_148: feature_name=ENSG00000087586 | feature_id[47].value <= threshold=302.0350036621094  |
| Class: G2M                             |                                                      |
|                                        |                                                      |
| Rules_8                                | passed counts:13                                     |
| node_0: feature_name=ENSG00000170312   | feature_id[0].value <= threshold=120.56500244140625  |
| node_1: feature_name=ENSG00000197061   | feature_id[1].value > threshold=794.760009765625     |

|                                        |                                                      |
|----------------------------------------|------------------------------------------------------|
| node_25: feature_name=ENSG00000128340  | feature_id[85].value <= threshold=131.6999969482422  |
| node_26: feature_name=ENSG00000167978  | feature_id[48].value <= threshold=178.33999633789062 |
| Class: S                               |                                                      |
|                                        |                                                      |
| Rules_9                                | passed counts:10                                     |
| node_0: feature_name=ENSG00000170312   | feature_id[0].value > threshold=120.56500244140625   |
| node_30: feature_name=ENSG00000140451  | feature_id[3].value > threshold=8.110000133514404    |
| node_88: feature_name=ENSG00000105173  | feature_id[8].value <= threshold=98.07999801635742   |
| node_89: feature_name=ENSG00000170312  | feature_id[0].value > threshold=160.83999633789062   |
| node_95: feature_name=ENSG00000167978  | feature_id[48].value > threshold=37.79999923706055   |
| node_101: feature_name=ENSG00000130429 | feature_id[93].value <= threshold=323.2150115966797  |
| node_102: feature_name=ENSG00000117724 | feature_id[61].value <= threshold=42.60000038146973  |
| node_103: feature_name=ENSG00000101003 | feature_id[65].value > threshold=18.390000343322754  |
| node_115: feature_name=ENSG00000171421 | feature_id[70].value <= threshold=163.31999969482422 |
| Class: S                               |                                                      |
|                                        |                                                      |
| Rules_10                               | passed counts:10                                     |
| node_0: feature_name=ENSG00000170312   | feature_id[0].value > threshold=120.56500244140625   |
| node_30: feature_name=ENSG00000140451  | feature_id[3].value <= threshold=8.110000133514404   |
| node_31: feature_name=ENSG00000100297  | feature_id[28].value > threshold=111.95999908447266  |
| node_51: feature_name=ENSG00000197061  | feature_id[1].value > threshold=468.4400177001953    |
| node_55: feature_name=ENSG00000012048  | feature_id[12].value <= threshold=23.5600004196167   |
| node_56: feature_name=ENSG00000167978  | feature_id[48].value > threshold=66.39500045776367   |
| node_64: feature_name=ENSG00000189057  | feature_id[7].value <= threshold=166.1999969482422   |
| Class: G2M                             |                                                      |

|                                       |                                                      |
|---------------------------------------|------------------------------------------------------|
| Rules_11                              | passed counts:10                                     |
| node_0: feature_name=ENSG00000170312  | feature_id[0].value > threshold=120.56500244140625   |
| node_30: feature_name=ENSG00000140451 | feature_id[3].value <= threshold=8.110000133514404   |
| node_31: feature_name=ENSG00000100297 | feature_id[28].value > threshold=111.95999908447266  |
| node_51: feature_name=ENSG00000197061 | feature_id[1].value > threshold=468.4400177001953    |
| node_55: feature_name=ENSG00000012048 | feature_id[12].value <= threshold=23.5600004196167   |
| node_56: feature_name=ENSG00000167978 | feature_id[48].value <= threshold=66.39500045776367  |
| node_57: feature_name=ENSG00000007968 | feature_id[68].value <= threshold=11.649999618530273 |
| node_58: feature_name=ENSG00000124172 | feature_id[95].value <= threshold=285.64500427246094 |
| Class: S                              |                                                      |
| Rules_12                              | passed counts:8                                      |
| node_0: feature_name=ENSG00000170312  | feature_id[0].value > threshold=120.56500244140625   |
| node_30: feature_name=ENSG00000140451 | feature_id[3].value <= threshold=8.110000133514404   |
| node_31: feature_name=ENSG00000100297 | feature_id[28].value <= threshold=111.95999908447266 |
| node_32: feature_name=ENSG00000150991 | feature_id[6].value <= threshold=998.7099914550781   |
| node_33: feature_name=ENSG00000175305 | feature_id[35].value > threshold=14.080000400543213  |
| node_43: feature_name=ENSG00000124172 | feature_id[95].value > threshold=191.47000122070312  |
| Class: S                              |                                                      |
| Rules_13                              | passed counts:8                                      |
| node_0: feature_name=ENSG00000170312  | feature_id[0].value <= threshold=120.56500244140625  |
| node_1: feature_name=ENSG00000197061  | feature_id[1].value <= threshold=794.760009765625    |
| node_2: feature_name=ENSG00000145425  | feature_id[46].value <= threshold=4353.8848876953125 |

|                                        |                                                      |
|----------------------------------------|------------------------------------------------------|
| node_3: feature_name=ENSG00000127948   | feature_id[39].value <= threshold=4.385000109672546  |
| node_4: feature_name=ENSG00000012048   | feature_id[12].value <= threshold=37.64999961853027  |
| node_5: feature_name=ENSG00000124172   | feature_id[95].value <= threshold=544.1550140380859  |
| Class: G1                              |                                                      |
|                                        |                                                      |
| Rules_14                               | passed counts:7                                      |
| node_0: feature_name=ENSG00000170312   | feature_id[0].value > threshold=120.56500244140625   |
| node_30: feature_name=ENSG00000140451  | feature_id[3].value > threshold=8.110000133514404    |
| node_88: feature_name=ENSG00000105173  | feature_id[8].value <= threshold=98.07999801635742   |
| node_89: feature_name=ENSG00000170312  | feature_id[0].value > threshold=160.83999633789062   |
| node_95: feature_name=ENSG00000167978  | feature_id[48].value > threshold=37.79999923706055   |
| node_101: feature_name=ENSG00000130429 | feature_id[93].value <= threshold=323.2150115966797  |
| node_102: feature_name=ENSG00000117724 | feature_id[61].value > threshold=42.60000038146973   |
| node_118: feature_name=ENSG00000276368 | feature_id[29].value <= threshold=333.0249938964844  |
| node_119: feature_name=ENSG00000122952 | feature_id[54].value <= threshold=716.2649841308594  |
| node_120: feature_name=ENSG00000092853 | feature_id[75].value <= threshold=40.64500045776367  |
| node_121: feature_name=ENSG00000177426 | feature_id[37].value <= threshold=32.579999923706055 |
| node_122: feature_name=ENSG00000160957 | feature_id[77].value <= threshold=85.9000015258789   |
| Class: G2M                             |                                                      |
|                                        |                                                      |
| Rules_15                               | passed counts:7                                      |
| node_0: feature_name=ENSG00000170312   | feature_id[0].value > threshold=120.56500244140625   |
| node_30: feature_name=ENSG00000140451  | feature_id[3].value <= threshold=8.110000133514404   |
| node_31: feature_name=ENSG00000100297  | feature_id[28].value > threshold=111.95999908447266  |
| node_51: feature_name=ENSG00000197061  | feature_id[1].value <= threshold=468.4400177001953   |

|                                        |                                                      |
|----------------------------------------|------------------------------------------------------|
| node_52: feature_name=ENSG00000176890  | feature_id[80].value <= threshold=1332.7100219726562 |
| Class: G1                              |                                                      |
| Rules_16                               | passed counts:5                                      |
| node_0: feature_name=ENSG00000170312   | feature_id[0].value > threshold=120.56500244140625   |
| node_30: feature_name=ENSG00000140451  | feature_id[3].value > threshold=8.110000133514404    |
| node_88: feature_name=ENSG00000105173  | feature_id[8].value <= threshold=98.07999801635742   |
| node_89: feature_name=ENSG00000170312  | feature_id[0].value > threshold=160.83999633789062   |
| node_95: feature_name=ENSG00000167978  | feature_id[48].value > threshold=37.79999923706055   |
| node_101: feature_name=ENSG00000130429 | feature_id[93].value > threshold=323.2150115966797   |
| node_137: feature_name=ENSG00000118680 | feature_id[16].value <= threshold=2694.409912109375  |
| Class: S                               |                                                      |
| Rules_17                               | passed counts:5                                      |
| node_0: feature_name=ENSG00000170312   | feature_id[0].value > threshold=120.56500244140625   |
| node_30: feature_name=ENSG00000140451  | feature_id[3].value > threshold=8.110000133514404    |
| node_88: feature_name=ENSG00000105173  | feature_id[8].value <= threshold=98.07999801635742   |
| node_89: feature_name=ENSG00000170312  | feature_id[0].value > threshold=160.83999633789062   |
| node_95: feature_name=ENSG00000167978  | feature_id[48].value <= threshold=37.79999923706055  |
| node_96: feature_name=ENSG00000163918  | feature_id[100].value > threshold=34.13000011444092  |
| Class: S                               |                                                      |
| Rules_18                               | passed counts:5                                      |
| node_0: feature_name=ENSG00000170312   | feature_id[0].value > threshold=120.56500244140625   |
| node_30: feature_name=ENSG00000140451  | feature_id[3].value > threshold=8.110000133514404    |

|                                       |                                                      |
|---------------------------------------|------------------------------------------------------|
| node_88: feature_name=ENSG00000105173 | feature_id[8].value <= threshold=98.07999801635742   |
| node_89: feature_name=ENSG00000170312 | feature_id[0].value <= threshold=160.83999633789062  |
| node_90: feature_name=ENSG00000164924 | feature_id[58].value > threshold=637.7749938964844   |
| Class: G1                             |                                                      |
|                                       |                                                      |
| Rules_19                              | passed counts:4                                      |
| node_0: feature_name=ENSG00000170312  | feature_id[0].value > threshold=120.56500244140625   |
| node_30: feature_name=ENSG00000140451 | feature_id[3].value <= threshold=8.110000133514404   |
| node_31: feature_name=ENSG00000100297 | feature_id[28].value <= threshold=111.95999908447266 |
| node_32: feature_name=ENSG00000150991 | feature_id[6].value <= threshold=998.7099914550781   |
| node_33: feature_name=ENSG00000175305 | feature_id[35].value > threshold=14.080000400543213  |
| node_43: feature_name=ENSG00000124172 | feature_id[95].value <= threshold=191.47000122070312 |
| node_44: feature_name=ENSG00000101447 | feature_id[10].value > threshold=25.724998950958252  |
| Class: G2M                            |                                                      |
|                                       |                                                      |
| Rules_20                              | passed counts:4                                      |
| node_0: feature_name=ENSG00000170312  | feature_id[0].value <= threshold=120.56500244140625  |
| node_1: feature_name=ENSG00000197061  | feature_id[1].value <= threshold=794.760009765625    |
| node_2: feature_name=ENSG00000145425  | feature_id[46].value <= threshold=4353.8848876953125 |
| node_3: feature_name=ENSG00000127948  | feature_id[39].value <= threshold=4.385000109672546  |
| node_4: feature_name=ENSG0000012048   | feature_id[12].value > threshold=37.64999961853027   |
| Class: S                              |                                                      |
|                                       |                                                      |
| Rules_21                              | passed counts:3                                      |
| node_0: feature_name=ENSG00000170312  | feature_id[0].value > threshold=120.56500244140625   |



|                                        |                                                     |
|----------------------------------------|-----------------------------------------------------|
| node_30: feature_name=ENSG00000140451  | feature_id[3].value > threshold=8.110000133514404   |
| node_88: feature_name=ENSG00000105173  | feature_id[8].value > threshold=98.07999801635742   |
| node_140: feature_name=ENSG00000173207 | feature_id[27].value <= threshold=529.4750061035156 |
| node_141: feature_name=ENSG00000185361 | feature_id[97].value > threshold=7.180000066757202  |
| Class: G2M                             |                                                     |
| Rules_22                               | passed counts:3                                     |
| node_0: feature_name=ENSG00000170312   | feature_id[0].value > threshold=120.56500244140625  |
| node_30: feature_name=ENSG00000140451  | feature_id[3].value > threshold=8.110000133514404   |
| node_88: feature_name=ENSG00000105173  | feature_id[8].value <= threshold=98.07999801635742  |
| node_89: feature_name=ENSG00000170312  | feature_id[0].value > threshold=160.83999633789062  |
| node_95: feature_name=ENSG00000167978  | feature_id[48].value > threshold=37.79999923706055  |
| node_101: feature_name=ENSG00000130429 | feature_id[93].value > threshold=323.2150115966797  |
| node_137: feature_name=ENSG00000118680 | feature_id[16].value > threshold=2694.409912109375  |
| Class: G2M                             |                                                     |
| Rules_23                               | passed counts:3                                     |
| node_0: feature_name=ENSG00000170312   | feature_id[0].value > threshold=120.56500244140625  |
| node_30: feature_name=ENSG00000140451  | feature_id[3].value > threshold=8.110000133514404   |
| node_88: feature_name=ENSG00000105173  | feature_id[8].value <= threshold=98.07999801635742  |
| node_89: feature_name=ENSG00000170312  | feature_id[0].value > threshold=160.83999633789062  |
| node_95: feature_name=ENSG00000167978  | feature_id[48].value > threshold=37.79999923706055  |
| node_101: feature_name=ENSG00000130429 | feature_id[93].value <= threshold=323.2150115966797 |
| node_102: feature_name=ENSG00000117724 | feature_id[61].value > threshold=42.60000038146973  |
| node_118: feature_name=ENSG00000276368 | feature_id[29].value <= threshold=333.0249938964844 |

|                                        |                                                      |
|----------------------------------------|------------------------------------------------------|
| node_119: feature_name=ENSG00000122952 | feature_id[54].value <= threshold=716.2649841308594  |
| node_120: feature_name=ENSG00000092853 | feature_id[75].value <= threshold=40.64500045776367  |
| node_121: feature_name=ENSG00000177426 | feature_id[37].value > threshold=32.579999923706055  |
| node_125: feature_name=ENSG00000178913 | feature_id[76].value <= threshold=114.54999923706055 |
| node_126: feature_name=ENSG00000146670 | feature_id[66].value <= threshold=33.939998626708984 |
| node_127: feature_name=ENSG00000130429 | feature_id[93].value > threshold=175.65499877929688  |
| Class: G2M                             |                                                      |
|                                        |                                                      |
| Rules_24                               | passed counts:3                                      |
| node_0: feature_name=ENSG00000170312   | feature_id[0].value > threshold=120.56500244140625   |
| node_30: feature_name=ENSG00000140451  | feature_id[3].value > threshold=8.110000133514404    |
| node_88: feature_name=ENSG00000105173  | feature_id[8].value <= threshold=98.07999801635742   |
| node_89: feature_name=ENSG00000170312  | feature_id[0].value > threshold=160.83999633789062   |
| node_95: feature_name=ENSG00000167978  | feature_id[48].value > threshold=37.79999923706055   |
| node_101: feature_name=ENSG00000130429 | feature_id[93].value <= threshold=323.2150115966797  |
| node_102: feature_name=ENSG00000117724 | feature_id[61].value > threshold=42.60000038146973   |
| node_118: feature_name=ENSG00000276368 | feature_id[29].value <= threshold=333.0249938964844  |
| node_119: feature_name=ENSG00000122952 | feature_id[54].value <= threshold=716.2649841308594  |
| node_120: feature_name=ENSG00000092853 | feature_id[75].value <= threshold=40.64500045776367  |
| node_121: feature_name=ENSG00000177426 | feature_id[37].value <= threshold=32.579999923706055 |
| node_122: feature_name=ENSG00000160957 | feature_id[77].value > threshold=85.9000015258789    |
| Class: S                               |                                                      |
|                                        |                                                      |
| Rules_25                               | passed counts:3                                      |
| node_0: feature_name=ENSG00000170312   | feature_id[0].value > threshold=120.56500244140625   |

|                                        |                                                     |
|----------------------------------------|-----------------------------------------------------|
| node_30: feature_name=ENSG00000140451  | feature_id[3].value > threshold=8.110000133514404   |
| node_88: feature_name=ENSG00000105173  | feature_id[8].value <= threshold=98.07999801635742  |
| node_89: feature_name=ENSG00000170312  | feature_id[0].value > threshold=160.83999633789062  |
| node_95: feature_name=ENSG00000167978  | feature_id[48].value > threshold=37.79999923706055  |
| node_101: feature_name=ENSG00000130429 | feature_id[93].value <= threshold=323.2150115966797 |
| node_102: feature_name=ENSG00000117724 | feature_id[61].value <= threshold=42.60000038146973 |
| node_103: feature_name=ENSG00000101003 | feature_id[65].value > threshold=18.390000343322754 |
| node_115: feature_name=ENSG00000171421 | feature_id[70].value > threshold=163.31999969482422 |
| Class: G2M                             |                                                     |
|                                        |                                                     |
| Rules_26                               | passed counts:3                                     |
| node_0: feature_name=ENSG00000170312   | feature_id[0].value > threshold=120.56500244140625  |
| node_30: feature_name=ENSG00000140451  | feature_id[3].value > threshold=8.110000133514404   |
| node_88: feature_name=ENSG00000105173  | feature_id[8].value <= threshold=98.07999801635742  |
| node_89: feature_name=ENSG00000170312  | feature_id[0].value <= threshold=160.83999633789062 |
| node_90: feature_name=ENSG00000164924  | feature_id[58].value <= threshold=637.7749938964844 |
| node_91: feature_name=ENSG00000145425  | feature_id[46].value > threshold=1300.0050048828125 |
| Class: S                               |                                                     |
|                                        |                                                     |
| Rules_27                               | passed counts:3                                     |
| node_0: feature_name=ENSG00000170312   | feature_id[0].value > threshold=120.56500244140625  |
| node_30: feature_name=ENSG00000140451  | feature_id[3].value <= threshold=8.110000133514404  |
| node_31: feature_name=ENSG00000100297  | feature_id[28].value > threshold=111.95999908447266 |
| node_51: feature_name=ENSG00000197061  | feature_id[1].value > threshold=468.4400177001953   |
| node_55: feature_name=ENSG0000012048   | feature_id[12].value > threshold=23.5600004196167   |

|                                       |                                                      |
|---------------------------------------|------------------------------------------------------|
| node_67: feature_name=ENSG00000127564 | feature_id[86].value > threshold=22.22499942779541   |
| node_71: feature_name=ENSG00000167601 | feature_id[30].value <= threshold=391.2899932861328  |
| node_72: feature_name=ENSG00000229089 | feature_id[5].value <= threshold=106.125             |
| node_73: feature_name=ENSG00000117399 | feature_id[21].value <= threshold=510.64500427246094 |
| node_74: feature_name=ENSG00000185361 | feature_id[97].value <= threshold=12.335000038146973 |
| node_75: feature_name=ENSG00000146670 | feature_id[66].value > threshold=38.46000099182129   |
| node_79: feature_name=ENSG00000173207 | feature_id[27].value > threshold=653.6899719238281   |
| node_81: feature_name=ENSG00000170540 | feature_id[57].value > threshold=37.79999923706055   |
| Class: S                              |                                                      |
|                                       |                                                      |
| Rules_28                              | passed counts:3                                      |
| node_0: feature_name=ENSG00000170312  | feature_id[0].value > threshold=120.56500244140625   |
| node_30: feature_name=ENSG00000140451 | feature_id[3].value <= threshold=8.110000133514404   |
| node_31: feature_name=ENSG00000100297 | feature_id[28].value > threshold=111.95999908447266  |
| node_51: feature_name=ENSG00000197061 | feature_id[1].value > threshold=468.4400177001953    |
| node_55: feature_name=ENSG00000012048 | feature_id[12].value <= threshold=23.5600004196167   |
| node_56: feature_name=ENSG00000167978 | feature_id[48].value > threshold=66.39500045776367   |
| node_64: feature_name=ENSG00000189057 | feature_id[7].value > threshold=166.1999969482422    |
| Class: S                              |                                                      |
|                                       |                                                      |
| Rules_29                              | passed counts:3                                      |
| node_0: feature_name=ENSG00000170312  | feature_id[0].value > threshold=120.56500244140625   |
| node_30: feature_name=ENSG00000140451 | feature_id[3].value <= threshold=8.110000133514404   |
| node_31: feature_name=ENSG00000100297 | feature_id[28].value <= threshold=111.95999908447266 |
| node_32: feature_name=ENSG00000150991 | feature_id[6].value <= threshold=998.7099914550781   |

|                                        |                                                      |
|----------------------------------------|------------------------------------------------------|
| node_33: feature_name=ENSG00000175305  | feature_id[35].value <= threshold=14.080000400543213 |
| node_34: feature_name=ENSG00000186767  | feature_id[89].value > threshold=22.6850004196167    |
| node_40: feature_name=ENSG00000223564  | feature_id[26].value > threshold=12.195000171661377  |
| Class: S                               |                                                      |
| Rules_30                               | passed counts:3                                      |
| node_0: feature_name=ENSG00000170312   | feature_id[0].value <= threshold=120.56500244140625  |
| node_1: feature_name=ENSG00000197061   | feature_id[1].value > threshold=794.760009765625     |
| node_25: feature_name=ENSG00000128340  | feature_id[85].value > threshold=131.6999969482422   |
| Class: G1                              |                                                      |
| Rules_31                               | passed counts:3                                      |
| node_0: feature_name=ENSG00000170312   | feature_id[0].value <= threshold=120.56500244140625  |
| node_1: feature_name=ENSG00000197061   | feature_id[1].value <= threshold=794.760009765625    |
| node_2: feature_name=ENSG00000145425   | feature_id[46].value > threshold=4353.8848876953125  |
| Class: G2M                             |                                                      |
| Rules_32                               | passed counts:2                                      |
| node_0: feature_name=ENSG00000170312   | feature_id[0].value > threshold=120.56500244140625   |
| node_30: feature_name=ENSG00000140451  | feature_id[3].value > threshold=8.110000133514404    |
| node_88: feature_name=ENSG00000105173  | feature_id[8].value > threshold=98.07999801635742    |
| node_140: feature_name=ENSG00000173207 | feature_id[27].value > threshold=529.4750061035156   |
| node_146: feature_name=ENSG00000170540 | feature_id[57].value <= threshold=46.05500030517578  |
| Class: S                               |                                                      |

|                                        |                                                      |
|----------------------------------------|------------------------------------------------------|
| Rules_33                               | passed counts:2                                      |
| node_0: feature_name=ENSG00000170312   | feature_id[0].value > threshold=120.56500244140625   |
| node_30: feature_name=ENSG00000140451  | feature_id[3].value > threshold=8.110000133514404    |
| node_88: feature_name=ENSG00000105173  | feature_id[8].value <= threshold=98.07999801635742   |
| node_89: feature_name=ENSG00000170312  | feature_id[0].value > threshold=160.83999633789062   |
| node_95: feature_name=ENSG00000167978  | feature_id[48].value > threshold=37.79999923706055   |
| node_101: feature_name=ENSG00000130429 | feature_id[93].value <= threshold=323.2150115966797  |
| node_102: feature_name=ENSG00000117724 | feature_id[61].value > threshold=42.60000038146973   |
| node_118: feature_name=ENSG00000276368 | feature_id[29].value <= threshold=333.0249938964844  |
| node_119: feature_name=ENSG00000122952 | feature_id[54].value <= threshold=716.2649841308594  |
| node_120: feature_name=ENSG00000092853 | feature_id[75].value <= threshold=40.64500045776367  |
| node_121: feature_name=ENSG00000177426 | feature_id[37].value > threshold=32.579999923706055  |
| node_125: feature_name=ENSG00000178913 | feature_id[76].value > threshold=114.54999923706055  |
| node_131: feature_name=ENSG00000117724 | feature_id[61].value > threshold=76.71999740600586   |
| Class: G2M                             |                                                      |
|                                        |                                                      |
| Rules_34                               | passed counts:2                                      |
| node_0: feature_name=ENSG00000170312   | feature_id[0].value > threshold=120.56500244140625   |
| node_30: feature_name=ENSG00000140451  | feature_id[3].value > threshold=8.110000133514404    |
| node_88: feature_name=ENSG00000105173  | feature_id[8].value <= threshold=98.07999801635742   |
| node_89: feature_name=ENSG00000170312  | feature_id[0].value > threshold=160.83999633789062   |
| node_95: feature_name=ENSG00000167978  | feature_id[48].value > threshold=37.79999923706055   |
| node_101: feature_name=ENSG00000130429 | feature_id[93].value <= threshold=323.2150115966797  |
| node_102: feature_name=ENSG00000117724 | feature_id[61].value <= threshold=42.60000038146973  |
| node_103: feature_name=ENSG00000101003 | feature_id[65].value <= threshold=18.390000343322754 |

|                                        |                                                      |
|----------------------------------------|------------------------------------------------------|
| node_104: feature_name=ENSG00000112029 | feature_id[18].value > threshold=93.15499877929688   |
| Class: S                               |                                                      |
| Rules_35                               | passed counts:2                                      |
| node_0: feature_name=ENSG00000170312   | feature_id[0].value > threshold=120.56500244140625   |
| node_30: feature_name=ENSG00000140451  | feature_id[3].value > threshold=8.110000133514404    |
| node_88: feature_name=ENSG00000105173  | feature_id[8].value <= threshold=98.07999801635742   |
| node_89: feature_name=ENSG00000170312  | feature_id[0].value > threshold=160.83999633789062   |
| node_95: feature_name=ENSG00000167978  | feature_id[48].value > threshold=37.79999923706055   |
| node_101: feature_name=ENSG00000130429 | feature_id[93].value <= threshold=323.2150115966797  |
| node_102: feature_name=ENSG00000117724 | feature_id[61].value <= threshold=42.60000038146973  |
| node_103: feature_name=ENSG00000101003 | feature_id[65].value <= threshold=18.390000343322754 |
| node_104: feature_name=ENSG00000112029 | feature_id[18].value <= threshold=93.15499877929688  |
| node_105: feature_name=ENSG00000114346 | feature_id[74].value > threshold=8.815000057220459   |
| node_107: feature_name=ENSG00000149548 | feature_id[83].value > threshold=6.200000047683716   |
| node_111: feature_name=ENSG00000144354 | feature_id[59].value <= threshold=6.335000157356262  |
| Class: S                               |                                                      |
| Rules_36                               | passed counts:2                                      |
| node_0: feature_name=ENSG00000170312   | feature_id[0].value > threshold=120.56500244140625   |
| node_30: feature_name=ENSG00000140451  | feature_id[3].value > threshold=8.110000133514404    |
| node_88: feature_name=ENSG00000105173  | feature_id[8].value <= threshold=98.07999801635742   |
| node_89: feature_name=ENSG00000170312  | feature_id[0].value > threshold=160.83999633789062   |
| node_95: feature_name=ENSG00000167978  | feature_id[48].value > threshold=37.79999923706055   |
| node_101: feature_name=ENSG00000130429 | feature_id[93].value <= threshold=323.2150115966797  |

|                                        |                                                      |
|----------------------------------------|------------------------------------------------------|
| node_102: feature_name=ENSG00000117724 | feature_id[61].value <= threshold=42.60000038146973  |
| node_103: feature_name=ENSG00000101003 | feature_id[65].value <= threshold=18.390000343322754 |
| node_104: feature_name=ENSG00000112029 | feature_id[18].value <= threshold=93.15499877929688  |
| node_105: feature_name=ENSG00000114346 | feature_id[74].value <= threshold=8.815000057220459  |
| Class: S                               |                                                      |
| Rules_37                               | passed counts:2                                      |
| node_0: feature_name=ENSG00000170312   | feature_id[0].value > threshold=120.56500244140625   |
| node_30: feature_name=ENSG00000140451  | feature_id[3].value <= threshold=8.110000133514404   |
| node_31: feature_name=ENSG00000100297  | feature_id[28].value > threshold=111.95999908447266  |
| node_51: feature_name=ENSG00000197061  | feature_id[1].value > threshold=468.4400177001953    |
| node_55: feature_name=ENSG0000012048   | feature_id[12].value > threshold=23.5600004196167    |
| node_67: feature_name=ENSG00000127564  | feature_id[86].value > threshold=22.22499942779541   |
| node_71: feature_name=ENSG00000167601  | feature_id[30].value > threshold=391.2899932861328   |
| Class: G2M                             |                                                      |
| Rules_38                               | passed counts:2                                      |
| node_0: feature_name=ENSG00000170312   | feature_id[0].value > threshold=120.56500244140625   |
| node_30: feature_name=ENSG00000140451  | feature_id[3].value <= threshold=8.110000133514404   |
| node_31: feature_name=ENSG00000100297  | feature_id[28].value > threshold=111.95999908447266  |
| node_51: feature_name=ENSG00000197061  | feature_id[1].value > threshold=468.4400177001953    |
| node_55: feature_name=ENSG0000012048   | feature_id[12].value > threshold=23.5600004196167    |
| node_67: feature_name=ENSG00000127564  | feature_id[86].value > threshold=22.22499942779541   |
| node_71: feature_name=ENSG00000167601  | feature_id[30].value <= threshold=391.2899932861328  |
| node_72: feature_name=ENSG00000229089  | feature_id[5].value > threshold=106.125              |



|                                       |                                                      |
|---------------------------------------|------------------------------------------------------|
| Class: G2M                            |                                                      |
| Rules_39                              | passed counts:2                                      |
| node_0: feature_name=ENSG00000170312  | feature_id[0].value > threshold=120.56500244140625   |
| node_30: feature_name=ENSG00000140451 | feature_id[3].value <= threshold=8.110000133514404   |
| node_31: feature_name=ENSG00000100297 | feature_id[28].value > threshold=111.95999908447266  |
| node_51: feature_name=ENSG00000197061 | feature_id[1].value > threshold=468.4400177001953    |
| node_55: feature_name=ENSG00000012048 | feature_id[12].value > threshold=23.5600004196167    |
| node_67: feature_name=ENSG00000127564 | feature_id[86].value <= threshold=22.22499942779541  |
| node_68: feature_name=ENSG00000186767 | feature_id[89].value <= threshold=19.394999504089355 |
| Class: G2M                            |                                                      |
| Rules_40                              | passed counts:2                                      |
| node_0: feature_name=ENSG00000170312  | feature_id[0].value > threshold=120.56500244140625   |
| node_30: feature_name=ENSG00000140451 | feature_id[3].value <= threshold=8.110000133514404   |
| node_31: feature_name=ENSG00000100297 | feature_id[28].value > threshold=111.95999908447266  |
| node_51: feature_name=ENSG00000197061 | feature_id[1].value > threshold=468.4400177001953    |
| node_55: feature_name=ENSG00000012048 | feature_id[12].value <= threshold=23.5600004196167   |
| node_56: feature_name=ENSG00000167978 | feature_id[48].value <= threshold=66.39500045776367  |
| node_57: feature_name=ENSG00000007968 | feature_id[68].value > threshold=11.649999618530273  |
| node_61: feature_name=ENSG00000171848 | feature_id[45].value <= threshold=863.9649963378906  |
| Class: G1                             |                                                      |
| Rules_41                              | passed counts:2                                      |
| node_0: feature_name=ENSG00000170312  | feature_id[0].value > threshold=120.56500244140625   |

|                                       |                                                      |
|---------------------------------------|------------------------------------------------------|
| node_30: feature_name=ENSG00000140451 | feature_id[3].value <= threshold=8.110000133514404   |
| node_31: feature_name=ENSG00000100297 | feature_id[28].value > threshold=111.95999908447266  |
| node_51: feature_name=ENSG00000197061 | feature_id[1].value <= threshold=468.4400177001953   |
| node_52: feature_name=ENSG00000176890 | feature_id[80].value > threshold=1332.7100219726562  |
| Class: S                              |                                                      |
| Rules_42                              | passed counts:2                                      |
| node_0: feature_name=ENSG00000170312  | feature_id[0].value > threshold=120.56500244140625   |
| node_30: feature_name=ENSG00000140451 | feature_id[3].value <= threshold=8.110000133514404   |
| node_31: feature_name=ENSG00000100297 | feature_id[28].value <= threshold=111.95999908447266 |
| node_32: feature_name=ENSG00000150991 | feature_id[6].value > threshold=998.7099914550781    |
| node_48: feature_name=ENSG00000205352 | feature_id[88].value <= threshold=73.43000030517578  |
| Class: G2M                            |                                                      |
| Rules_43                              | passed counts:2                                      |
| node_0: feature_name=ENSG00000170312  | feature_id[0].value > threshold=120.56500244140625   |
| node_30: feature_name=ENSG00000140451 | feature_id[3].value <= threshold=8.110000133514404   |
| node_31: feature_name=ENSG00000100297 | feature_id[28].value <= threshold=111.95999908447266 |
| node_32: feature_name=ENSG00000150991 | feature_id[6].value <= threshold=998.7099914550781   |
| node_33: feature_name=ENSG00000175305 | feature_id[35].value <= threshold=14.080000400543213 |
| node_34: feature_name=ENSG00000186767 | feature_id[89].value <= threshold=22.6850004196167   |
| node_35: feature_name=ENSG00000185361 | feature_id[97].value > threshold=16.954999923706055  |
| Class: G1                             |                                                      |
| Rules_44                              | passed counts:2                                      |

|                                        |                                                      |
|----------------------------------------|------------------------------------------------------|
| node_0: feature_name=ENSG00000170312   | feature_id[0].value <= threshold=120.56500244140625  |
| node_1: feature_name=ENSG00000197061   | feature_id[1].value <= threshold=794.760009765625    |
| node_2: feature_name=ENSG00000145425   | feature_id[46].value <= threshold=4353.8848876953125 |
| node_3: feature_name=ENSG00000127948   | feature_id[39].value > threshold=4.385000109672546   |
| node_9: feature_name=ENSG00000150991   | feature_id[6].value > threshold=72.85999965667725    |
| node_11: feature_name=ENSG00000014138  | feature_id[17].value > threshold=102.51499938964844  |
| node_21: feature_name=ENSG00000170425  | feature_id[22].value > threshold=54.829999923706055  |
| Class: G1                              |                                                      |
|                                        |                                                      |
| Rules_45                               | passed counts:2                                      |
| node_0: feature_name=ENSG00000170312   | feature_id[0].value <= threshold=120.56500244140625  |
| node_1: feature_name=ENSG00000197061   | feature_id[1].value <= threshold=794.760009765625    |
| node_2: feature_name=ENSG00000145425   | feature_id[46].value <= threshold=4353.8848876953125 |
| node_3: feature_name=ENSG00000127948   | feature_id[39].value > threshold=4.385000109672546   |
| node_9: feature_name=ENSG00000150991   | feature_id[6].value > threshold=72.85999965667725    |
| node_11: feature_name=ENSG00000014138  | feature_id[17].value > threshold=102.51499938964844  |
| node_21: feature_name=ENSG00000170425  | feature_id[22].value <= threshold=54.829999923706055 |
| Class: S                               |                                                      |
|                                        |                                                      |
| Rules_46                               | passed counts:1                                      |
| node_0: feature_name=ENSG00000170312   | feature_id[0].value > threshold=120.56500244140625   |
| node_30: feature_name=ENSG00000140451  | feature_id[3].value > threshold=8.110000133514404    |
| node_88: feature_name=ENSG00000105173  | feature_id[8].value > threshold=98.07999801635742    |
| node_140: feature_name=ENSG00000173207 | feature_id[27].value > threshold=529.4750061035156   |
| node_146: feature_name=ENSG00000170540 | feature_id[57].value > threshold=46.05500030517578   |

|                                        |                                                     |
|----------------------------------------|-----------------------------------------------------|
| node_148: feature_name=ENSG00000087586 | feature_id[47].value > threshold=302.0350036621094  |
| Class: S                               |                                                     |
| Rules_47                               | passed counts: 1                                    |
| node_0: feature_name=ENSG00000170312   | feature_id[0].value > threshold=120.56500244140625  |
| node_30: feature_name=ENSG00000140451  | feature_id[3].value > threshold=8.110000133514404   |
| node_88: feature_name=ENSG00000105173  | feature_id[8].value > threshold=98.07999801635742   |
| node_140: feature_name=ENSG00000173207 | feature_id[27].value <= threshold=529.4750061035156 |
| node_141: feature_name=ENSG00000185361 | feature_id[97].value <= threshold=7.180000066757202 |
| node_142: feature_name=ENSG00000128340 | feature_id[85].value <= threshold=16.95500087738037 |
| Class: G2M                             |                                                     |
| Rules_48                               | passed counts: 1                                    |
| node_0: feature_name=ENSG00000170312   | feature_id[0].value > threshold=120.56500244140625  |
| node_30: feature_name=ENSG00000140451  | feature_id[3].value > threshold=8.110000133514404   |
| node_88: feature_name=ENSG00000105173  | feature_id[8].value <= threshold=98.07999801635742  |
| node_89: feature_name=ENSG00000170312  | feature_id[0].value > threshold=160.83999633789062  |
| node_95: feature_name=ENSG00000167978  | feature_id[48].value > threshold=37.79999923706055  |
| node_101: feature_name=ENSG00000130429 | feature_id[93].value <= threshold=323.2150115966797 |
| node_102: feature_name=ENSG00000117724 | feature_id[61].value > threshold=42.60000038146973  |
| node_118: feature_name=ENSG00000276368 | feature_id[29].value > threshold=333.0249938964844  |
| Class: S                               |                                                     |
| Rules_49                               | passed counts: 1                                    |
| node_0: feature_name=ENSG00000170312   | feature_id[0].value > threshold=120.56500244140625  |

|                                        |                                                     |
|----------------------------------------|-----------------------------------------------------|
| node_30: feature_name=ENSG00000140451  | feature_id[3].value > threshold=8.110000133514404   |
| node_88: feature_name=ENSG00000105173  | feature_id[8].value <= threshold=98.07999801635742  |
| node_89: feature_name=ENSG00000170312  | feature_id[0].value > threshold=160.83999633789062  |
| node_95: feature_name=ENSG00000167978  | feature_id[48].value > threshold=37.79999923706055  |
| node_101: feature_name=ENSG00000130429 | feature_id[93].value <= threshold=323.2150115966797 |
| node_102: feature_name=ENSG00000117724 | feature_id[61].value > threshold=42.60000038146973  |
| node_118: feature_name=ENSG00000276368 | feature_id[29].value <= threshold=333.0249938964844 |
| node_119: feature_name=ENSG00000122952 | feature_id[54].value > threshold=716.2649841308594  |
| Class: S                               |                                                     |
|                                        |                                                     |
| Rules_50                               | passed counts:1                                     |
| node_0: feature_name=ENSG00000170312   | feature_id[0].value > threshold=120.56500244140625  |
| node_30: feature_name=ENSG00000140451  | feature_id[3].value > threshold=8.110000133514404   |
| node_88: feature_name=ENSG00000105173  | feature_id[8].value <= threshold=98.07999801635742  |
| node_89: feature_name=ENSG00000170312  | feature_id[0].value > threshold=160.83999633789062  |
| node_95: feature_name=ENSG00000167978  | feature_id[48].value > threshold=37.79999923706055  |
| node_101: feature_name=ENSG00000130429 | feature_id[93].value <= threshold=323.2150115966797 |
| node_102: feature_name=ENSG00000117724 | feature_id[61].value > threshold=42.60000038146973  |
| node_118: feature_name=ENSG00000276368 | feature_id[29].value <= threshold=333.0249938964844 |
| node_119: feature_name=ENSG00000122952 | feature_id[54].value <= threshold=716.2649841308594 |
| node_120: feature_name=ENSG00000092853 | feature_id[75].value > threshold=40.64500045776367  |
| Class: S                               |                                                     |
|                                        |                                                     |
| Rules_51                               | passed counts:1                                     |
| node_0: feature_name=ENSG00000170312   | feature_id[0].value > threshold=120.56500244140625  |

|                                        |                                                     |
|----------------------------------------|-----------------------------------------------------|
| node_30: feature_name=ENSG00000140451  | feature_id[3].value > threshold=8.110000133514404   |
| node_88: feature_name=ENSG00000105173  | feature_id[8].value <= threshold=98.07999801635742  |
| node_89: feature_name=ENSG00000170312  | feature_id[0].value > threshold=160.83999633789062  |
| node_95: feature_name=ENSG00000167978  | feature_id[48].value > threshold=37.79999923706055  |
| node_101: feature_name=ENSG00000130429 | feature_id[93].value <= threshold=323.2150115966797 |
| node_102: feature_name=ENSG00000117724 | feature_id[61].value > threshold=42.60000038146973  |
| node_118: feature_name=ENSG00000276368 | feature_id[29].value <= threshold=333.0249938964844 |
| node_119: feature_name=ENSG00000122952 | feature_id[54].value <= threshold=716.2649841308594 |
| node_120: feature_name=ENSG00000092853 | feature_id[75].value <= threshold=40.64500045776367 |
| node_121: feature_name=ENSG00000177426 | feature_id[37].value > threshold=32.579999923706055 |
| node_125: feature_name=ENSG00000178913 | feature_id[76].value > threshold=114.54999923706055 |
| node_131: feature_name=ENSG00000117724 | feature_id[61].value <= threshold=76.71999740600586 |
| Class: S                               |                                                     |
|                                        |                                                     |
| Rules_52                               | passed counts:1                                     |
| node_0: feature_name=ENSG00000170312   | feature_id[0].value > threshold=120.56500244140625  |
| node_30: feature_name=ENSG00000140451  | feature_id[3].value > threshold=8.110000133514404   |
| node_88: feature_name=ENSG00000105173  | feature_id[8].value <= threshold=98.07999801635742  |
| node_89: feature_name=ENSG00000170312  | feature_id[0].value > threshold=160.83999633789062  |
| node_95: feature_name=ENSG00000167978  | feature_id[48].value > threshold=37.79999923706055  |
| node_101: feature_name=ENSG00000130429 | feature_id[93].value <= threshold=323.2150115966797 |
| node_102: feature_name=ENSG00000117724 | feature_id[61].value > threshold=42.60000038146973  |
| node_118: feature_name=ENSG00000276368 | feature_id[29].value <= threshold=333.0249938964844 |
| node_119: feature_name=ENSG00000122952 | feature_id[54].value <= threshold=716.2649841308594 |
| node_120: feature_name=ENSG00000092853 | feature_id[75].value <= threshold=40.64500045776367 |

|                                        |                                                      |
|----------------------------------------|------------------------------------------------------|
| node_121: feature_name=ENSG00000177426 | feature_id[37].value > threshold=32.57999923706055   |
| node_125: feature_name=ENSG00000178913 | feature_id[76].value <= threshold=114.54999923706055 |
| node_126: feature_name=ENSG00000146670 | feature_id[66].value <= threshold=33.939998626708984 |
| node_127: feature_name=ENSG00000130429 | feature_id[93].value <= threshold=175.65499877929688 |
| Class: S                               |                                                      |
| Rules_53                               | passed counts:1                                      |
| node_0: feature_name=ENSG00000170312   | feature_id[0].value > threshold=120.56500244140625   |
| node_30: feature_name=ENSG00000140451  | feature_id[3].value > threshold=8.110000133514404    |
| node_88: feature_name=ENSG00000105173  | feature_id[8].value <= threshold=98.07999801635742   |
| node_89: feature_name=ENSG00000170312  | feature_id[0].value > threshold=160.83999633789062   |
| node_95: feature_name=ENSG00000167978  | feature_id[48].value > threshold=37.79999923706055   |
| node_101: feature_name=ENSG00000130429 | feature_id[93].value <= threshold=323.2150115966797  |
| node_102: feature_name=ENSG00000117724 | feature_id[61].value <= threshold=42.60000038146973  |
| node_103: feature_name=ENSG00000101003 | feature_id[65].value <= threshold=18.390000343322754 |
| node_104: feature_name=ENSG00000112029 | feature_id[18].value <= threshold=93.15499877929688  |
| node_105: feature_name=ENSG00000114346 | feature_id[74].value > threshold=8.815000057220459   |
| node_107: feature_name=ENSG00000149548 | feature_id[83].value > threshold=6.200000047683716   |
| node_111: feature_name=ENSG00000144354 | feature_id[59].value > threshold=6.335000157356262   |
| Class: G2M                             |                                                      |
| Rules_54                               | passed counts:1                                      |
| node_0: feature_name=ENSG00000170312   | feature_id[0].value > threshold=120.56500244140625   |
| node_30: feature_name=ENSG00000140451  | feature_id[3].value > threshold=8.110000133514404    |
| node_88: feature_name=ENSG00000105173  | feature_id[8].value <= threshold=98.07999801635742   |

|                                        |                                                      |
|----------------------------------------|------------------------------------------------------|
| node_89: feature_name=ENSG00000170312  | feature_id[0].value > threshold=160.83999633789062   |
| node_95: feature_name=ENSG00000167978  | feature_id[48].value > threshold=37.79999923706055   |
| node_101: feature_name=ENSG00000130429 | feature_id[93].value <= threshold=323.2150115966797  |
| node_102: feature_name=ENSG00000117724 | feature_id[61].value <= threshold=42.60000038146973  |
| node_103: feature_name=ENSG00000101003 | feature_id[65].value <= threshold=18.390000343322754 |
| node_104: feature_name=ENSG00000112029 | feature_id[18].value <= threshold=93.15499877929688  |
| node_105: feature_name=ENSG00000114346 | feature_id[74].value > threshold=8.815000057220459   |
| node_107: feature_name=ENSG00000149548 | feature_id[83].value <= threshold=6.200000047683716  |
| node_108: feature_name=ENSG00000128340 | feature_id[85].value <= threshold=5.1000001430511475 |
| Class: S                               |                                                      |
|                                        |                                                      |
| Rules_55                               | passed counts:1                                      |
| node_0: feature_name=ENSG00000170312   | feature_id[0].value > threshold=120.56500244140625   |
| node_30: feature_name=ENSG00000140451  | feature_id[3].value > threshold=8.110000133514404    |
| node_88: feature_name=ENSG00000105173  | feature_id[8].value <= threshold=98.07999801635742   |
| node_89: feature_name=ENSG00000170312  | feature_id[0].value > threshold=160.83999633789062   |
| node_95: feature_name=ENSG00000167978  | feature_id[48].value <= threshold=37.79999923706055  |
| node_96: feature_name=ENSG00000163918  | feature_id[100].value <= threshold=34.13000011444092 |
| node_97: feature_name=ENSG00000158246  | feature_id[63].value > threshold=4.670000076293945   |
| Class: G2M                             |                                                      |
|                                        |                                                      |
| Rules_56                               | passed counts:1                                      |
| node_0: feature_name=ENSG00000170312   | feature_id[0].value > threshold=120.56500244140625   |
| node_30: feature_name=ENSG00000140451  | feature_id[3].value > threshold=8.110000133514404    |
| node_88: feature_name=ENSG00000105173  | feature_id[8].value <= threshold=98.07999801635742   |



|                                       |                                                      |
|---------------------------------------|------------------------------------------------------|
| node_89: feature_name=ENSG00000170312 | feature_id[0].value > threshold=160.83999633789062   |
| node_95: feature_name=ENSG00000167978 | feature_id[48].value <= threshold=37.79999923706055  |
| node_96: feature_name=ENSG00000163918 | feature_id[100].value <= threshold=34.13000011444092 |
| node_97: feature_name=ENSG00000158246 | feature_id[63].value <= threshold=4.670000076293945  |
| Class: G1                             |                                                      |
| Rules_57                              | passed counts:1                                      |
| node_0: feature_name=ENSG00000170312  | feature_id[0].value > threshold=120.56500244140625   |
| node_30: feature_name=ENSG00000140451 | feature_id[3].value > threshold=8.110000133514404    |
| node_88: feature_name=ENSG00000105173 | feature_id[8].value <= threshold=98.07999801635742   |
| node_89: feature_name=ENSG00000170312 | feature_id[0].value <= threshold=160.83999633789062  |
| node_90: feature_name=ENSG00000164924 | feature_id[58].value <= threshold=637.7749938964844  |
| node_91: feature_name=ENSG00000145425 | feature_id[46].value <= threshold=1300.0050048828125 |
| Class: G2M                            |                                                      |
| Rules_58                              | passed counts:1                                      |
| node_0: feature_name=ENSG00000170312  | feature_id[0].value > threshold=120.56500244140625   |
| node_30: feature_name=ENSG00000140451 | feature_id[3].value <= threshold=8.110000133514404   |
| node_31: feature_name=ENSG00000100297 | feature_id[28].value > threshold=111.95999908447266  |
| node_51: feature_name=ENSG00000197061 | feature_id[1].value > threshold=468.4400177001953    |
| node_55: feature_name=ENSG00000012048 | feature_id[12].value > threshold=23.5600004196167    |
| node_67: feature_name=ENSG00000127564 | feature_id[86].value > threshold=22.22499942779541   |
| node_71: feature_name=ENSG00000167601 | feature_id[30].value <= threshold=391.2899932861328  |
| node_72: feature_name=ENSG00000229089 | feature_id[5].value <= threshold=106.125             |
| node_73: feature_name=ENSG00000117399 | feature_id[21].value > threshold=510.64500427246094  |

|                                       |                                                      |
|---------------------------------------|------------------------------------------------------|
| Class: G1                             |                                                      |
| Rules_59                              | passed counts:1                                      |
| node_0: feature_name=ENSG00000170312  | feature_id[0].value > threshold=120.56500244140625   |
| node_30: feature_name=ENSG00000140451 | feature_id[3].value <= threshold=8.110000133514404   |
| node_31: feature_name=ENSG00000100297 | feature_id[28].value > threshold=111.95999908447266  |
| node_51: feature_name=ENSG00000197061 | feature_id[1].value > threshold=468.4400177001953    |
| node_55: feature_name=ENSG00000012048 | feature_id[12].value > threshold=23.5600004196167    |
| node_67: feature_name=ENSG00000127564 | feature_id[86].value > threshold=22.22499942779541   |
| node_71: feature_name=ENSG00000167601 | feature_id[30].value <= threshold=391.2899932861328  |
| node_72: feature_name=ENSG00000229089 | feature_id[5].value <= threshold=106.125             |
| node_73: feature_name=ENSG00000117399 | feature_id[21].value <= threshold=510.64500427246094 |
| node_74: feature_name=ENSG00000185361 | feature_id[97].value > threshold=12.335000038146973  |
| Class: G2M                            |                                                      |
| Rules_60                              | passed counts:1                                      |
| node_0: feature_name=ENSG00000170312  | feature_id[0].value > threshold=120.56500244140625   |
| node_30: feature_name=ENSG00000140451 | feature_id[3].value <= threshold=8.110000133514404   |
| node_31: feature_name=ENSG00000100297 | feature_id[28].value > threshold=111.95999908447266  |
| node_51: feature_name=ENSG00000197061 | feature_id[1].value > threshold=468.4400177001953    |
| node_55: feature_name=ENSG00000012048 | feature_id[12].value > threshold=23.5600004196167    |
| node_67: feature_name=ENSG00000127564 | feature_id[86].value > threshold=22.22499942779541   |
| node_71: feature_name=ENSG00000167601 | feature_id[30].value <= threshold=391.2899932861328  |
| node_72: feature_name=ENSG00000229089 | feature_id[5].value <= threshold=106.125             |
| node_73: feature_name=ENSG00000117399 | feature_id[21].value <= threshold=510.64500427246094 |

|                                       |                                                      |
|---------------------------------------|------------------------------------------------------|
| node_74: feature_name=ENSG00000185361 | feature_id[97].value <= threshold=12.335000038146973 |
| node_75: feature_name=ENSG00000146670 | feature_id[66].value > threshold=38.46000099182129   |
| node_79: feature_name=ENSG00000173207 | feature_id[27].value > threshold=653.6899719238281   |
| node_81: feature_name=ENSG00000170540 | feature_id[57].value <= threshold=37.79999923706055  |
| Class: G2M                            |                                                      |
| Rules_61                              | passed counts:1                                      |
| node_0: feature_name=ENSG00000170312  | feature_id[0].value > threshold=120.56500244140625   |
| node_30: feature_name=ENSG00000140451 | feature_id[3].value <= threshold=8.110000133514404   |
| node_31: feature_name=ENSG00000100297 | feature_id[28].value > threshold=111.95999908447266  |
| node_51: feature_name=ENSG00000197061 | feature_id[1].value > threshold=468.4400177001953    |
| node_55: feature_name=ENSG0000012048  | feature_id[12].value > threshold=23.5600004196167    |
| node_67: feature_name=ENSG00000127564 | feature_id[86].value > threshold=22.22499942779541   |
| node_71: feature_name=ENSG00000167601 | feature_id[30].value <= threshold=391.2899932861328  |
| node_72: feature_name=ENSG00000229089 | feature_id[5].value <= threshold=106.125             |
| node_73: feature_name=ENSG00000117399 | feature_id[21].value <= threshold=510.64500427246094 |
| node_74: feature_name=ENSG00000185361 | feature_id[97].value <= threshold=12.335000038146973 |
| node_75: feature_name=ENSG00000146670 | feature_id[66].value <= threshold=38.46000099182129  |
| node_76: feature_name=ENSG00000259848 | feature_id[13].value > threshold=17.149999618530273  |
| Class: G2M                            |                                                      |
| Rules_62                              | passed counts:1                                      |
| node_0: feature_name=ENSG00000170312  | feature_id[0].value > threshold=120.56500244140625   |
| node_30: feature_name=ENSG00000140451 | feature_id[3].value <= threshold=8.110000133514404   |
| node_31: feature_name=ENSG00000100297 | feature_id[28].value > threshold=111.95999908447266  |

|                                       |                                                      |
|---------------------------------------|------------------------------------------------------|
| node_51: feature_name=ENSG00000197061 | feature_id[1].value > threshold=468.4400177001953    |
| node_55: feature_name=ENSG00000012048 | feature_id[12].value > threshold=23.5600004196167    |
| node_67: feature_name=ENSG00000127564 | feature_id[86].value > threshold=22.22499942779541   |
| node_71: feature_name=ENSG00000167601 | feature_id[30].value <= threshold=391.2899932861328  |
| node_72: feature_name=ENSG00000229089 | feature_id[5].value <= threshold=106.125             |
| node_73: feature_name=ENSG00000117399 | feature_id[21].value <= threshold=510.64500427246094 |
| node_74: feature_name=ENSG00000185361 | feature_id[97].value <= threshold=12.335000038146973 |
| node_75: feature_name=ENSG00000146670 | feature_id[66].value <= threshold=38.46000099182129  |
| node_76: feature_name=ENSG00000259848 | feature_id[13].value <= threshold=17.149999618530273 |
| Class: S                              |                                                      |
|                                       |                                                      |
| Rules_63                              | passed counts:1                                      |
| node_0: feature_name=ENSG00000170312  | feature_id[0].value > threshold=120.56500244140625   |
| node_30: feature_name=ENSG00000140451 | feature_id[3].value <= threshold=8.110000133514404   |
| node_31: feature_name=ENSG00000100297 | feature_id[28].value > threshold=111.95999908447266  |
| node_51: feature_name=ENSG00000197061 | feature_id[1].value > threshold=468.4400177001953    |
| node_55: feature_name=ENSG00000012048 | feature_id[12].value > threshold=23.5600004196167    |
| node_67: feature_name=ENSG00000127564 | feature_id[86].value <= threshold=22.22499942779541  |
| node_68: feature_name=ENSG00000186767 | feature_id[89].value > threshold=19.394999504089355  |
| Class: G1                             |                                                      |
|                                       |                                                      |
| Rules_64                              | passed counts:1                                      |
| node_0: feature_name=ENSG00000170312  | feature_id[0].value > threshold=120.56500244140625   |
| node_30: feature_name=ENSG00000140451 | feature_id[3].value <= threshold=8.110000133514404   |
| node_31: feature_name=ENSG00000100297 | feature_id[28].value > threshold=111.95999908447266  |

|                                       |                                                      |
|---------------------------------------|------------------------------------------------------|
| node_51: feature_name=ENSG00000197061 | feature_id[1].value > threshold=468.4400177001953    |
| node_55: feature_name=ENSG00000012048 | feature_id[12].value <= threshold=23.5600004196167   |
| node_56: feature_name=ENSG00000167978 | feature_id[48].value <= threshold=66.39500045776367  |
| node_57: feature_name=ENSG00000007968 | feature_id[68].value > threshold=11.649999618530273  |
| node_61: feature_name=ENSG00000171848 | feature_id[45].value > threshold=863.9649963378906   |
| Class: G2M                            |                                                      |
|                                       |                                                      |
| Rules_65                              | passed counts: 1                                     |
| node_0: feature_name=ENSG00000170312  | feature_id[0].value > threshold=120.56500244140625   |
| node_30: feature_name=ENSG00000140451 | feature_id[3].value <= threshold=8.110000133514404   |
| node_31: feature_name=ENSG00000100297 | feature_id[28].value > threshold=111.95999908447266  |
| node_51: feature_name=ENSG00000197061 | feature_id[1].value > threshold=468.4400177001953    |
| node_55: feature_name=ENSG00000012048 | feature_id[12].value <= threshold=23.5600004196167   |
| node_56: feature_name=ENSG00000167978 | feature_id[48].value <= threshold=66.39500045776367  |
| node_57: feature_name=ENSG00000007968 | feature_id[68].value <= threshold=11.649999618530273 |
| node_58: feature_name=ENSG00000124172 | feature_id[95].value > threshold=285.64500427246094  |
| Class: G2M                            |                                                      |
|                                       |                                                      |
| Rules_66                              | passed counts: 1                                     |
| node_0: feature_name=ENSG00000170312  | feature_id[0].value > threshold=120.56500244140625   |
| node_30: feature_name=ENSG00000140451 | feature_id[3].value <= threshold=8.110000133514404   |
| node_31: feature_name=ENSG00000100297 | feature_id[28].value <= threshold=111.95999908447266 |
| node_32: feature_name=ENSG00000150991 | feature_id[6].value <= threshold=998.7099914550781   |
| node_33: feature_name=ENSG00000175305 | feature_id[35].value > threshold=14.080000400543213  |
| node_43: feature_name=ENSG00000124172 | feature_id[95].value <= threshold=191.47000122070312 |

|                                       |                                                      |
|---------------------------------------|------------------------------------------------------|
| node_44: feature_name=ENSG00000101447 | feature_id[10].value <= threshold=25.724998950958252 |
| Class: S                              |                                                      |
| Rules_67                              | passed counts: 1                                     |
| node_0: feature_name=ENSG00000170312  | feature_id[0].value > threshold=120.56500244140625   |
| node_30: feature_name=ENSG00000140451 | feature_id[3].value <= threshold=8.110000133514404   |
| node_31: feature_name=ENSG00000100297 | feature_id[28].value <= threshold=111.95999908447266 |
| node_32: feature_name=ENSG00000150991 | feature_id[6].value <= threshold=998.7099914550781   |
| node_33: feature_name=ENSG00000175305 | feature_id[35].value <= threshold=14.080000400543213 |
| node_34: feature_name=ENSG00000186767 | feature_id[89].value > threshold=22.6850004196167    |
| node_40: feature_name=ENSG00000223564 | feature_id[26].value <= threshold=12.195000171661377 |
| Class: G2M                            |                                                      |
| Rules_68                              | passed counts: 1                                     |
| node_0: feature_name=ENSG00000170312  | feature_id[0].value > threshold=120.56500244140625   |
| node_30: feature_name=ENSG00000140451 | feature_id[3].value <= threshold=8.110000133514404   |
| node_31: feature_name=ENSG00000100297 | feature_id[28].value <= threshold=111.95999908447266 |
| node_32: feature_name=ENSG00000150991 | feature_id[6].value <= threshold=998.7099914550781   |
| node_33: feature_name=ENSG00000175305 | feature_id[35].value <= threshold=14.080000400543213 |
| node_34: feature_name=ENSG00000186767 | feature_id[89].value <= threshold=22.6850004196167   |
| node_35: feature_name=ENSG00000185361 | feature_id[97].value <= threshold=16.954999923706055 |
| node_36: feature_name=ENSG00000177426 | feature_id[37].value > threshold=286.0399932861328   |
| Class: S                              |                                                      |
| Rules_69                              | passed counts: 1                                     |

|                                       |                                                      |
|---------------------------------------|------------------------------------------------------|
| node_0: feature_name=ENSG00000170312  | feature_id[0].value <= threshold=120.56500244140625  |
| node_1: feature_name=ENSG00000197061  | feature_id[1].value > threshold=794.760009765625     |
| node_25: feature_name=ENSG00000128340 | feature_id[85].value <= threshold=131.6999969482422  |
| node_26: feature_name=ENSG00000167978 | feature_id[48].value > threshold=178.33999633789062  |
| Class: G1                             |                                                      |
| Rules_70                              | passed counts:1                                      |
| node_0: feature_name=ENSG00000170312  | feature_id[0].value <= threshold=120.56500244140625  |
| node_1: feature_name=ENSG00000197061  | feature_id[1].value <= threshold=794.760009765625    |
| node_2: feature_name=ENSG00000145425  | feature_id[46].value <= threshold=4353.8848876953125 |
| node_3: feature_name=ENSG00000127948  | feature_id[39].value > threshold=4.385000109672546   |
| node_9: feature_name=ENSG00000150991  | feature_id[6].value > threshold=72.85999965667725    |
| node_11: feature_name=ENSG00000014138 | feature_id[17].value <= threshold=102.51499938964844 |
| node_12: feature_name=ENSG00000087077 | feature_id[71].value > threshold=35.76500129699707   |
| node_16: feature_name=ENSG00000007968 | feature_id[68].value > threshold=20.079999923706055  |
| node_18: feature_name=ENSG00000167513 | feature_id[73].value > threshold=23.320000648498535  |
| Class: S                              |                                                      |
| Rules_71                              | passed counts:1                                      |
| node_0: feature_name=ENSG00000170312  | feature_id[0].value <= threshold=120.56500244140625  |
| node_1: feature_name=ENSG00000197061  | feature_id[1].value <= threshold=794.760009765625    |
| node_2: feature_name=ENSG00000145425  | feature_id[46].value <= threshold=4353.8848876953125 |
| node_3: feature_name=ENSG00000127948  | feature_id[39].value > threshold=4.385000109672546   |
| node_9: feature_name=ENSG00000150991  | feature_id[6].value > threshold=72.85999965667725    |
| node_11: feature_name=ENSG00000014138 | feature_id[17].value <= threshold=102.51499938964844 |

|                                       |                                                      |
|---------------------------------------|------------------------------------------------------|
| node_12: feature_name=ENSG00000087077 | feature_id[71].value > threshold=35.76500129699707   |
| node_16: feature_name=ENSG00000007968 | feature_id[68].value > threshold=20.079999923706055  |
| node_18: feature_name=ENSG00000167513 | feature_id[73].value <= threshold=23.320000648498535 |
| Class: G1                             |                                                      |
|                                       |                                                      |
| Rules_72                              | passed counts: 1                                     |
| node_0: feature_name=ENSG00000170312  | feature_id[0].value <= threshold=120.56500244140625  |
| node_1: feature_name=ENSG00000197061  | feature_id[1].value <= threshold=794.760009765625    |
| node_2: feature_name=ENSG00000145425  | feature_id[46].value <= threshold=4353.8848876953125 |
| node_3: feature_name=ENSG00000127948  | feature_id[39].value > threshold=4.385000109672546   |
| node_9: feature_name=ENSG00000150991  | feature_id[6].value > threshold=72.85999965667725    |
| node_11: feature_name=ENSG00000014138 | feature_id[17].value <= threshold=102.51499938964844 |
| node_12: feature_name=ENSG00000087077 | feature_id[71].value <= threshold=35.76500129699707  |
| node_13: feature_name=ENSG00000131747 | feature_id[19].value > threshold=50.72500038146973   |
| Class: G1                             |                                                      |
|                                       |                                                      |
| Rules_73                              | passed counts: 1                                     |
| node_0: feature_name=ENSG00000170312  | feature_id[0].value <= threshold=120.56500244140625  |
| node_1: feature_name=ENSG00000197061  | feature_id[1].value <= threshold=794.760009765625    |
| node_2: feature_name=ENSG00000145425  | feature_id[46].value <= threshold=4353.8848876953125 |
| node_3: feature_name=ENSG00000127948  | feature_id[39].value > threshold=4.385000109672546   |
| node_9: feature_name=ENSG00000150991  | feature_id[6].value > threshold=72.85999965667725    |
| node_11: feature_name=ENSG00000014138 | feature_id[17].value <= threshold=102.51499938964844 |
| node_12: feature_name=ENSG00000087077 | feature_id[71].value <= threshold=35.76500129699707  |
| node_13: feature_name=ENSG00000131747 | feature_id[19].value <= threshold=50.72500038146973  |



|                                      |                                                      |
|--------------------------------------|------------------------------------------------------|
| Class: G2M                           |                                                      |
| Rules_74                             | passed counts: 1                                     |
| node_0: feature_name=ENSG00000170312 | feature_id[0].value <= threshold=120.56500244140625  |
| node_1: feature_name=ENSG00000197061 | feature_id[1].value <= threshold=794.760009765625    |
| node_2: feature_name=ENSG00000145425 | feature_id[46].value <= threshold=4353.8848876953125 |
| node_3: feature_name=ENSG00000127948 | feature_id[39].value > threshold=4.385000109672546   |
| node_9: feature_name=ENSG00000150991 | feature_id[6].value <= threshold=72.85999965667725   |
| Class: S                             |                                                      |
| Rules_75                             | passed counts: 1                                     |
| node_0: feature_name=ENSG00000170312 | feature_id[0].value <= threshold=120.56500244140625  |
| node_1: feature_name=ENSG00000197061 | feature_id[1].value <= threshold=794.760009765625    |
| node_2: feature_name=ENSG00000145425 | feature_id[46].value <= threshold=4353.8848876953125 |
| node_3: feature_name=ENSG00000127948 | feature_id[39].value <= threshold=4.385000109672546  |
| node_4: feature_name=ENSG00000012048 | feature_id[12].value <= threshold=37.64999961853027  |
| node_5: feature_name=ENSG00000124172 | feature_id[95].value > threshold=544.1550140380859   |
| Class: S                             |                                                      |
